# Supplementary material for: Tandem Repeats in Bacillus: Unique Features and Taxonomic Distribution
Source: MDPI journal article supplement (doi:10.3390/ijms22105373), 2021-05-20
Supplement: s1 [file s1]

Table S5

**EXAMPLES OF COMPLETE TANDEM REPEAT SEQUENCES IN FIVE GENOMES***B.coagulans**B.alkalitelluris**B.mesonae**B.cellulosilyticus**B.weihaensis**B.coagulans*. NCBI code: NZ\_CP026649.1.

All tandem repeats with repeat 52

The CG sequence is highlighted to demonstrate the irregular sequence of each repeat, while its size is constant with a very few exceptions. There are two types of tandem repeats, with characteristic signals either **TCTAYG** or **AARGACA** (or reverse). In practically all cases the direct and reverse sequence are present in the same repeat, which may indicate that they form an RNA hairpin. There is only one exception, a short tandem repeat at position 2867866.

```
> TTAAGGAAGC Con:1 reps=11 [16146,16780] l-int=635 l-seq = 52
TTAAGGAAGCGTGGAAAAAAGAAGGCCTTTCTTTACATAGAGCCCCCTCTATG
TTAAGGAAGCAACAAAAAGAAGGTCTTCCTTCAATAGAGTGTGTCTACG
TTAAGGAAGCGCGAAAAAAGAAGGTCTTTCTTTACCTAGAGCGCGTCTACG
TTAAGGAAGCAACAAAAAGAAGATCTTCCTTCACTTAGAGCGCATCTACG
TTAAGGAAGCGCGAAAAAAGGCGGTCTTTCTTTACCTAGAGCGCGTCTACG
TTAAGGAAGCAAGCAAAAAACAAGGTCTTCCTTAACATAGGGCGCATCTACA
TTAAGGAAGCGCGAAAAAAGGCGGTCTTTCTTTACCTAGAGCGCGTCTACG
TTAAGGAAGCAAGCAAAAAACAAGGTCTTCCTTAACATAGGGCGCATCTACA
TTAAGGAAGCGCGAAAAAAGGCGGTCTTTCTTTACCTAGAGCGCGTCTATG
TTAAGGAATCAACAAAAACAAGGTCTTCCTTAACATAGGGCGCGTCTACG
TTAAGGAAGCAACAAAAAGAAGGTCTTCCTTCACTTAGAGCCCGTCTATG
TTAAGGAAGCAAGCAAAAAACAAGGTCTTCCTTAACATAGGGCGCGTCTACGTTAAGGAAGC
> TTTGTCCTTT Con:1 reps=5 [91213,91536] l-int=324 l-seq = 52
TTTGTCTTTTGGCAGGTTCAAAGAAGACATTTGGGACCAGGATGCAGCTTGT
TTTGTCTTTTGCAGGTTCAAAGAAGACATTTTGGGGCCAGGTGCGGTATGT
TTTGTCTTTTGAAGGCTTCAAAGAAGACATTTGGAACCGGATGCAATCGTGT
TTTGTCTTTTGAAGGCTTCAAAGGGACATTTGGGGCCAGGATGCAACGTGT
TTTGTCTTTTGGCAGGTTCAAGAAGACATTTTGGGGCCAGGTGCAGTTTGA
TTTGTCTTTTGGGCGTTTCAAAGACATTTGAGCCAGGTGCGTCTTGTGTTTGTCTTT
> CTACGTTAAG Con:1 reps=13 [246661,247295] l-int=635 l-seq = 52
CTACGTTAAGGAAGCGAGCCAAAACCGCGTGTATCTTAAATAGAGAGCGCT
CTACGTTAAGGAAGCAGCTGAAATTTTCCGTGTATCTTAAATAGAGAGGCT
CTACGTTAAGGAAGCAAGTCAAATCTGCGTGTATCTTAAATAGAGAGGCT
CTACGTTAAGGAAGCAAGTCAAATCTGCGTGTATCTTAAATAGAGAGGCT
CTACGTTAAGGAAGCAGCGAAATCTGTCTGTATCTTAAATAGAGAGGCC
CTACGTTAAGGAAGCGAACCATAATCCGCGCGTATCTTAAATAGAGAGGCT
CTACGTTAAGGAAGCAGTCAAAACTGCTGTGTATCTTAAATAGAGAGGCT
CTACGTTAAGGAAGCAGCTGAAATTTTCCGTGTATCTTAAATAGAGAGGCT
CTACGTTAAGGAAGCAGTCAAAACTGCTGTATATCTTAAATAGAGAGGCT
CTACGTTAAGGAAGCAAGCCAAACCTTCCGCGTATCTTAAATAGAGAGGCT
CTACGTTAAGGAAGCAGCTGAAATCCGTCGCGTATCTTAAATAGAGAGTGCT
CTACGTTAAGGAAGCAGTCAAAACAGCGGTGTATCTTAAATAGAGAGGGCTCTACGTTAAG
> CTATGTGAAG Con:1 reps=4 [272402,272568] l-int=167 l-seq = 52
CTATGTGAAGGAAGATCTTCATTTTCCGTTCTTCCTTAAATAGAGTGGGCT
CTATGTGAAGAAAGCCCTTCATTTTCCAGCTTTCTTAACATAGCCGGGCT
CTATGTGAAGAAAGACCTTCTTTTTTCCATGCTCCCTTAAATAGCCGGGTCTATGTGAAG
> AAAAGACA Con:1 reps=9 [304761,305189] l-int=429 l-seq = 52
AAAAGACA AAAAGGAATGATTCCACCTGAAATGTCCCTAGAACACTTCA
AAAAGACA AAAAGGAGGTGGGACCGAGTCCAAAATGTCCTTTTAAAAAGTTCA
AAAAGACA AAAAGGATCCGCGGAGGTCCAAAATGTCCTTTTAGAGACCTTCA
AAAAGACA AAAAGGCAATGATTCTCGCCCCAAGATGTCCCTAGACCGCCTTCA
AAAAGACA AAAAGGAGTGGGGATCGAGCCAAAATGTCCTTTTAAAGATGCTCA
AAAAGACA AAAAGGATCTGGGTAGTGGTCCAAGTGTCTTTTAAAGACCTTCA
AAAAGACA AAAAGGGGTGGGACTGAGTCCAAAATGTCCTTTTAAAAAGTTCA
```

AAAGACA AAAAAGGATC **CGTAC** **CGATGGTCCCAATGTTTTTTAGAGGTCTTTAA** **AAAGACA** AA  
 > CTTAA **CGTAG** Con:1 reps=17 [312592,313642] 1-int=1051 1-seq = 52  
 CTTAA **CGTAGACGGGC** **TCTATG** TTAAGAAAGGC **CGTCAATTTTT** **CGTACTTC**  
 CTTAA **CGTAGACGGCC** **TCTATG** TGAAGAAAGACCTTCAATTTTC **CGTGCTTC**  
 CTTAA **CATAGACGGGC** **TCTATG** TGAAGAAAGGTCATCTTTTTTT **CGTGCTTC**  
 CTTAA **CGTAGACGGGC** **TCTATG** TTAAGAAAGGC **CGTCAATTTTT** CATGCTTT  
 CTTAA **CGTAGACGGC** CCCTAAGTGAAGGAAGGTCTT **CGATTTTT** **CGTGCTTT**  
 CTTAA **CGTAGACGGGC** **TCTATG** TCAAGGAAGGTCTT **CGTTTT** **CGTGCTTT**  
 CTTAA **CGTAGACACCC** **TCTATG** TGAAGAAAGACCTTCAATTTTCCTTGCTTT  
 CTTAA **CATAGACGGGC** **TCTATG** TTAAGAAAGGC **CGTCAATTTTT** CATGCTTT  
 CTTAA **CGTAGACGGC** CCCTATGTGAAGGAAGGC **CGTCAATTTTT** CATGCTTT  
 CTTAA **CGTAGACGGCC** **TCTATG** TGAAGAAAGACCTTCAATTTTC **CGCG** CTTTC  
 CTTAA **CATAGACGGCC** CCCTATGTGAAGGAAGGTCTT **CGTTTT** TGCTTGCTTT  
 CTTAA **CGTAGACGGC** **TCTATG** TTAAGAAAGGC **CGTCAATTTTT** **CGTACTTC**  
 CTTAA **CGTAGACGGCC** **TCTATG** TGAAGAAAGACCTTCAATTTTC **CGTGCTTC**  
 CTTCA **CATAGACGGAC** **TCTATG** TGAAGAAAGGTCATCTTTTTTT **CGTGCTAT**  
 CTTAA **CGTAGACGGC** CCCTATGTAAAGGAAGGTCTT **CGTTTT** **CGTGCTTT**  
 CTTAA **CGTAGACGGGC** **TCTATG** TTAAGGAAGGCCATCTTTTTTT **CGTGCTTT**  
 CTTAA **CGTAGACGGC** **TCTATG** TGAAGAAAGGC **CGTCAATTTTT** CATGCTTC  
 CTTAA **CGTAGACGGC** CCCTATGTGAAGGAAGGCCATCTTTTTTTTGCTTT  
 CTTAA **CGTAGACGGCC** **TCTATG** TGAAGGAAGGC **CGCCAATTTTC** **CGCG** CTTCTCTTAA **CGTAG**  
 > TCGAAATGTC Con:1 reps=9 [374204,374914] 1-int=711 1-seq = 52  
 TCGAAA **TGTCCTTT** TGGGGGTTTGAAGGCCAAAG **CGCCTTG** GTTGTTGGTGT  
 TCGAAA **TGTCCTTT** TGGAGGTTACAA **AAGGACA** AAAGTGGCTTGGGTAGTGT  
 TCGAAATGCCTTTTGGAGAGCTCAA **AAGGACA** AAAGGAACCC **CGGGCAGTGA**  
 TCGAAA **TGTCCTTT** TGGAGGGCTCAA **AAGGACA** AAAGGAATC **CGGGTAGCGA**  
 TCGAAA **TGTCCTTT** TGGAGGGTTCAAAGGCCAAAAGTGGCTTGGGTAGTGT  
 TCGAAA **TGTCCTTT** TGGAGGTTTGAAGGCCAAAAGTGGCCTGGTTGGTGT  
 TCGAA **TGTCCTTT** TGGAGGCTT **CGAGGCCACTGAAGAAGT** **CGAAATAATC**  
 TCGCTAAACACTGTATTAGATGTATT **TACCGG** TTTTATCATACTATATATTGTGTTAGTGAATCTATTCAAAAAG  
 TTTTTCAGTGGCCT **CGGAGGCTTCAA** **AAGGACA** AAAG **CGCCTTG** GTTGTTGGTGT  
 TCGAAA **TGTCCTTT** TGGAGAGTTCAA **AAGGACA** AAAGGAATC **CGGGCAGTGA**  
 TCGAAA **TGTCCTTT** TGGAGGCTTCAA **AAGGACA** AAAGGACCC **CGGGTAGCGA**  
 TCGAAA **TGTCCTTT** TGGAGGTTTCAA **AAGGACA** AAAGTGGCCTGGTTGGTGT  
 TCAAAA **TGTCCTTT** TGGAGGTTTCAAAGGCCAAAAG **CGGCTTG** GTTAGTGT **CGAAATGTC**  
 > TCTAAGTTAA Con:1 reps=4 [378507,378725] 1-int=219 1-seq = 52  
 TCTAAGTTAAGGAAG **CGCAG** AAAAAAGGAGGTCTTCTTCA **CGTAGAGCCCG**  
 TCTAAGTTAAGGAAG **CGAAG** CAAAAATAAAGGCCCTTCTTAA **CATAGAGCCCG**  
 TCTAAGTTAAGGAAG **CGAGG** AAAAAAGAGGTCTTCTTCA **CGTAGAGCCCG**  
 TCTAAGTGAAGGAAG **CGTGG** AAAAAAG **CGGCCTTCTTCA** **CATAGAGCCATCTAAGTTAA**  
 > **AAAGACA** AAA Con:1 reps=5 [419590,419808] 1-int=219 1-seq = 52  
**AAAGACA** AAAGTGAAGTGCC **CGCG** CAG **CGAATTG** TCTTTCATCAAGGTGATG  
**AAAGACA** AAAGGGGTTGCCCA **CGCAG** CAAAATGTCTTTCAT **CGGAGTTATG**  
**AAAGACA** AAAGAGAGCTGGAATC **CGAG** CAAAT **TGTCCTTT** TGGGGGATTCAA  
**AAAGACA** AAAGAAAGC **CGGACC** **CGGGTGAAT** **TGTCCTTT** TGGAGGTTCAA **AAAGACA** AAA  
 > TCAAAAAGAC Con:1 reps=7 [421586,421908] 1-int=323 1-seq = 52  
 TCAA **AAAGACA** AAAGAGAGCTGGAATC **CGAG** CAAATTGTCATTTGGAGGTC  
 TCAA **AAAGACA** AAAGAAAGT **CGGACC** CAGAGGCAAAC **TGTCCTTT** TGGAGGTC  
 TCAA **AAAGACA** AAAGAAAGC **CGGACC** **CGGGCAAAT** **TGTCCTTT** TGAAGGTC  
 TCAA **AAAGACA** AAAGAGAGCTGGGATC **CGTAC** AAAT **TGTCCTTT** TGAAGGTC  
 TCAA **AAAGACA** AAAGAGAGCTGGAATC **CGGGCAAAC** **TGTCCTTT** TGGAGGTT  
 TCAA **AAAGACA** AAAGAAAGC **CGGACC** **CGGGCAAAT** **TGTCCTTT** TGGGGGTTCAAAAAGAC  
 > TTTCAAAGGA Con:1 reps=6 [430682,430952] 1-int=271 1-seq = 52  
 TTTCAA **AAGGACA** TTT **CGGGCC** **CGGATGCAGCT** **CGTTT** **TGTCCTTT** TGA **CGGC**  
 TTTCAA **AAGGACA** TTT **CGGGCC** **CGGATGCAACTCCTTT** **TGTCCTTT** TGACAGG  
 TTTCAA **AAGGACA** TTT **CGTTACCTGATGCAGCT** **CGTTT** **TGTCCTTT** TGA **CGGC**  
 TTTCAA **AAGGACA** TTTTGGGCC **CGGATGCAATTCCTTT** **TGTCCTTT** TGACAGG  
 TTTCAA **AAGGACA** TTTTCATTCC **CGGATG** **CGGCA** **CGTTT** **TGTCCTTT** TGACAGGTTCAAAAGGA  
 > GCTCAAAAAG Con:1 reps=5 [447227,447445] 1-int=219 1-seq = 52  
 GCTCAA **AAAGACA** AAAGAGAGCTGGACCAGGAGCAAAT **TGTCCTTT** TGGAGA  
 GCTCAA **AAAGACA** AAAGAGAGT **CGGATCAGGGG** **CGAAT** **TGTCCTTT** TGGAGG  
 GCTCAA **AAAGACA** AAAGAAAGC **CGGACCAAGAGCAAAT** **TGTCCTTT** TGAATG  
 GCTCAA **AAAGACA** AAAGAGAGT **CGGATCAGGGG** **CGAAT** **TGTCCTTT** TGGAGAGCTCAAAAAG  
 > GT **TCTACG** TT Con:1 reps=9 [795794,796220] 1-int=427 1-seq = 52  
 GT **TCTACG** TTAAGGAACAGA **CGAAAAA** ATTGGTCAAAAGTTCA **CATAGAA** TG  
 GT **TCTACG** TTAAGGAACAGACAAAAATC **CGGT** CAAAAGTTCA **CGTAAAGTG**  
 GT **TCTACG** TTAAGGAACAGA **CGAAAAA** AT **CGGT** CAAAAGTTCA **CATAGAA** **CG**  
 GT **TCTACG** TTAAGGAACAGA **CGAAAAA** AT **CGGT** CAAAAGTTCA **CATAGAA** TG  
 GT **TCTACG** TTAAGGAACAGACAAAAATC **CGGT** CAAAAGTTCA **CATAGAG** **CG**  
 GT **TCTACG** TTAAGGAACAGACAAAAATC **CGGT** CAAAAGTTCA **CATAGAG** **CG**  
 GT **TCTACG** TTAAGGAAC **CGGA** **CGAAAAA** AT **CGGT** CATAAGTTCA **CATAGAGTG**  
 GT **TCTACG** TTAAGGAACATGCAAAAAATC **CGGCCATAAGTTCA** **CATAGAGCAGT** **TCTACGTT**  
 > TGTTCCTTAA Con:1 reps=4 [814905,815123] 1-int=219 1-seq = 52  
 TGTTCCTTAA **CATAGAGCGCG** **TCTATG** TGAAGGAAG **CGAGG** AAAAAATGCCT

TGTTCCCTTAA~~CGTAGA~~GTG~~CGTCTACG~~TGAAGGAAGCA~~CG~~CAAAAAAAT~~CGC~~  
 TGTTCCCTTAA~~CGTAGA~~GTG~~CGTCTATG~~TGAAGGAAA~~CGCG~~CACAAAAAT~~CGA~~  
 TATTCCTTAA~~CATAGA~~GTG~~CGTCTACG~~TGAAGGAAAC~~CG~~CAAGAAAT~~CG~~CTGTTCCCTTAA  
 > CTTAA~~CGTAG~~ Con:1 reps=8 [859087,859513] l-int=427 l-seq = 52  
 CTTAA~~CGTAGA~~~~CGGGTCTAAGTGAAGGAAG~~~~CGCG~~GAAAAAATTATTGTTT  
 CTTAA~~CGTAGGA~~~~CGCG~~CCTATGTGAAGGAAG~~CGGG~~~~CG~~AAAAATT~~CG~~TTGTTC  
 CTTAA~~CGTAGA~~~~CGCG~~CCTA~~CG~~TTAAGGAAG~~CGAG~~CAAAAA~~CG~~CAGTGTTC  
 CTTAA~~CATAGA~~GTG~~CGTCTATG~~TTAAGGAAG~~CGGG~~~~CG~~CAAAAGA~~CG~~TTGTTC  
 CTTAA~~CGTAGA~~~~CGGGTCTAAGTGAAGGAAG~~~~CGCG~~GAAAAA~~CG~~~~CG~~GTGTTT  
 CTTAA~~CGTAGA~~~~CGGGTCTACG~~TTAAGGAAG~~CGGG~~~~CG~~AAAAATT~~CG~~TTGTTC  
 CTTAA~~CGTAGA~~~~CGGGTCTGAGTGAAGGAAG~~~~CGCG~~GAAAAA~~CGCG~~TTGTTT  
 CTTAA~~CGTAGGATG~~~~CGTCTAAGTGAAGGAAG~~~~CGAG~~~~CG~~AAAAATCTGGTGTACCTTAA~~CGTAG~~  
 > CTTCCCTAAC Con:1 reps=6 [880079,880505] l-int=427 l-seq = 52  
 CTTCCCTTAA~~CATAGA~~~~CGGGTCTACG~~TTAAGATATCCATAAAAAATTC~~CGCGT~~  
 CTTCCCTTAA~~CGTAGA~~~~AGCGTCTATG~~TTAAGATACC~~CGG~~CAAAAC~~CGAGGGT~~  
 CTCCTTAACCTAGAG~~CGCG~~ACTA~~CG~~TTAAGATATC~~CG~~CAAAATTTTCT~~CG~~  
 CTTCCCTTAA~~CATAGA~~GTG~~CGTCTACG~~TTAAGATACC~~CGG~~CAAAATTGAGAGT  
 CTTTCCTTAA~~CATAGA~~GCA~~CGTCTACG~~TTAAGATATCCATAAAAAATTC~~CGCGT~~  
 CTTCCCTTAA~~CGTAGA~~GTGCT~~CTATG~~TTAAGATATC~~CGG~~CAAAAT~~CGAAGGT~~  
 CTTTCCTTAACTAGAG~~CGCG~~ACTA~~CG~~TTCAAGATACC~~CGT~~AAAAATTC~~CGCGT~~  
 CTTCCCTTAA~~CATAGA~~~~AGCGTCTATG~~TTAAGATACC~~CGG~~CAAAAT~~CGAGGGT~~CTTCCCTAAC  
 > TTCATAAG~~CG~~ Con:1 reps=4 [942373,942540] l-int=168 l-seq = 52  
 TTCATAAG~~CGGGATG~~~~AAAGACA~~AAAAAGCAAGAGCTG~~CGGAC~~~~CG~~AAATGTCC  
 TTCATAAG~~CGGGATG~~~~AAGGACA~~AAAGGAGG~~CGAACC~~~~CG~~CAGGCTGAAATGTCC  
 TTCATAAG~~CGGGATG~~~~AAAGGACA~~ATAGGGGG~~CGA~~ACTGCAGTCAAGAAATGTCCTTCATAAG~~CGG~~  
 > ATG~~AAAGACA~~ Con:1 reps=5 [975899,976117] l-int=219 l-seq = 52  
 ATG~~AAAGACA~~TTTTAAAGGGTGG~~CGGG~~~~CG~~CCTATTTGTCTTCAC~~CGG~~TTTG  
 ATG~~AAAGACA~~AAACAAAG~~CGCG~~ACTGCTTGCCATTTGTCCCTCAT~~CGATGCG~~  
 ATG~~AAAGACA~~AAACAAAGGTATGA~~CGGGTATCG~~ATTTGTCTTCATCACCC~~CG~~  
 ATG~~AAAGACA~~TTTTATAAGATGGCTGCCAGTATTCTGTCTTCAC~~CGGCATAATG~~~~AAAGACA~~  
 > ~~AAGGACA~~AAA Con:1 reps=10 [1089498,1090080] l-int=583 l-seq = 52  
~~AAGGACA~~AAATGTATG~~CGTGTGAC~~~~CGGGG~~AAATGTCCTTCATTG~~CGG~~~~CGGGA~~  
 TGAACAAGAGGTATG~~CGTGTGAGG~~~~CGGCGA~~AC~~TGTCCTTT~~TGAACCTGTCAA  
~~AAGGACA~~AAACAGGATGCACC~~CGGGCC~~~~CG~~AAA~~TGTCTTTT~~TAAAGC~~CGCCAA~~  
~~AAGGACA~~AAAGGAGTGG~~CGATTGGGCTCG~~AAA~~TGTCTTTT~~TGGGGCTGTCAA  
~~AAGGACA~~AAACAGGCTGCATT~~CGGGCTCG~~AAA~~TGTCTTTT~~TGAGCTTGTCAA  
~~AAGGACA~~AAACAGGCTGGATCAGGGGTCAAAC~~TGTCTTTT~~TGAAGC~~CGTCAA~~  
~~AAGGACA~~AAAGGAGT~~CGCG~~ATTGGGCT~~CGA~~AC~~TGTCTTTT~~TGGGGCTGTCAA  
~~AAGGACA~~AAACATGTTG~~CGTCCGGGGCC~~AAAC~~TGTCTTTT~~TGAACCTGTCAA  
~~AAAGACA~~AAACAGGCTG~~CGTCCGGGTT~~CAAAC~~TGTCTTTT~~TGATGCC~~CGCCAA~~  
~~AAGGACA~~AAAGGAGTGA~~CGTTTGAGCC~~~~CG~~AAA~~TGTCTTTT~~TGAGCTTGTCAA  
~~AAGGACA~~AAACAGGCTGGATCAGGGGTCAAAC~~TGTCTTTT~~TGAAGC~~CGTCAA~~~~AAGGACA~~AAA  
 > ~~AAGGACA~~AAA Con:1 reps=14 [1091587,1092481] l-int=895 l-seq = 52  
~~AAGGACA~~AAACATGTTG~~CGTCCGGGGCC~~AAAC~~TGTCTTTT~~TGAACCTGTCAA  
~~AAAGACA~~AAACAGGCTG~~CGTCCGGGTT~~CAAAC~~TGTCTTTT~~TGATGCC~~CGCCAA~~  
~~AAGGACA~~AAAGGAGTGA~~CGTTTGAGCC~~~~CG~~AAA~~TGTCTTTT~~TGAACCTGTCAA  
~~AAGGACA~~GAACAC~~CGCTGC~~ATACAGGCC~~CG~~AAA~~CGTCC~~TTTGAATCTGTAAA  
 AGGGAAAAAA~~CGCATGCC~~~~CG~~AAAC~~CGT~~TGAAATGTCTTCAT~~CGGGGTGATG~~  
~~AAGGACA~~AAAGTGAGC~~CGCCAA~~ACATTGAAATGTCTTTCAT~~CGGGCAAATG~~  
~~AAGGACA~~AAATGCAGGCC~~CGAGAC~~~~CGT~~GAAAATGTCCTTCAC~~CGGGTTGATG~~  
~~AAGGACA~~AAA~~CGCGAGCC~~~~CGAGAC~~~~CGT~~GAAAATGTCTTTCAC~~CGGGTTGATG~~  
~~AAGGACA~~AAA~~CGCGGGC~~~~CGCCA~~ACCATGAAA~~CGTCC~~TTTCAT~~CGGGCAAATG~~  
~~AAGGACA~~AAA~~CGCATGCC~~~~CGAAAC~~~~CGT~~TGAAATGTCTTTCATA~~CGGCAAATG~~  
~~AAGGACA~~AAA~~CGCGAGCC~~~~CGAGAC~~~~CGT~~GAAAATGTCTTTCAC~~CGGGTTGATG~~  
~~AAGGACA~~AAA~~CGCATGCC~~~~CGAGAC~~CATGAAAATGTCTTTCAT~~CGAGGTAATG~~  
~~AAGGACA~~AAA~~CGCG~~TGCCACCACACATTAAAATGTCTTTCATTGGGTTAATG  
~~AAGGACA~~AAA~~CGCGT~~GGCCACCACACATTAAAATGTCTTTCATTGGGTTAATG  
~~AAGGACA~~AAA~~CGCATGCC~~ACCAACCATTGAAATGTCTTAAATAGGGCAGATG  
~~AAAGACA~~AAA~~CGCAGGCC~~~~CGAGAC~~~~CGGG~~AAAATGTCTTTCAC~~CGGGTTGATG~~  
~~AAGGACA~~AAACAC~~CGAGCTCG~~AAAC~~CGTAGA~~AATGTCTTTCAT~~CGAGGTAATG~~~~AAGGACA~~AAA  
 > TGTTTTGTGCC Con:1 reps=10 [1107902,1108435] l-int=534 l-seq = 52  
 TGTTTT~~TGTCCTTT~~TAA~~CGGCTTCAT~~~~AAAGACA~~TTTCAGACCCAGT~~CGTGACT~~  
 CCTTTTGTGCTTTTGG~~CGGCAGGTTCAA~~~~AAGGACA~~TTTCAGGCC~~CGGAAGCAGCG~~  
 TGTTTTGTCT~~CGTGTGGCA~~ACTTCAA~~AAAGACA~~TTTTGGACC~~CGGAAGCAGCG~~  
 TGTTTT~~TGTCCTTT~~TGA~~CGGTTACAA~~~~AAGGACA~~TTT~~CGGGCC~~~~CGGAAGCAGCG~~  
 TGTTTT~~TGTCCTTT~~TGGCAGGTTCAA~~AAAGACA~~TTT~~CGAGCC~~~~CGGATGCAACA~~  
 TGTTTT~~TGTCCTTT~~TGA~~CGGCTTCAA~~~~AAGGACA~~TTT~~CGAGCC~~~~CGGATGCAACA~~  
 TGTTTT~~TGTCCTTT~~TGA~~CGGCTTCAA~~~~AAGGACA~~TTT~~CGGGCC~~~~CGGATACATCG~~  
 TGTTTT~~TGTCCTTT~~TGA~~CGGTTACAA~~~~AAGGACA~~TTT~~CGGGCC~~~~CGGATACATCG~~  
 TGTTTT~~TGTCCTTT~~TGA~~CGGCTTCAA~~~~AAGGACA~~TTT~~CGGATCCAGAC~~~~CGTAACG~~  
 TGTTTT~~TGTCCTTT~~TGA~~CGGCTTCAA~~~~AAAGACA~~TTT~~CGAGCTCGGATGAAA~~~~CGT~~TTTTGTCC  
 > ~~CGTCTATGT~~ Con:1 reps=5 [1175303,1175521] l-int=219 l-seq = 52  
~~CGTCTATGT~~TTAAGGAAGCACAGAAAAATGAAGTCTTTCTTCAC~~CGTATGGG~~  
~~CGTCTATGT~~TTAAGGAAGCATGGAAAAAGA~~CGGTCTTCTTCATGTATGGG~~  
~~CGTCTATGT~~TTAAGGAAGCATGGAAAAATGAGTTTCTTCTTCAC~~CGTAGAGG~~

GCGTCTATGTTAAGGAAGCGCGAAAAAACGACAGTCTTCTTAACGTAGGGAGCGTCTATG  
 > GTTAAGGAAG Con:1 reps=5 [1179203,1179473] l-int=271 l-seq = 52  
 GTTAAGGAAGCACGAAAAAAGATGGTCTTCTTCATCTAGAGGTCGTCTAC  
 GTTAAGGAAGCAAGCAAAAAAGGCGGCCTTCTTTACGTAGAGGTCGTCTAT  
 GTTAAGGAAGCATGGAAAAAAGAAGTCTTCTTCACGTATGGGGCGTCTAT  
 GTTAAGGAAGCGCGAAAAAACGACAGTCTTCTTAACGTAGGGAGCGTCTAT  
 GTTAAGAAAGCAAGCAAAAACGAGGTTCTTCTTCACATAGAGCCCGCCTACGTTAAGGAAG  
 > CAAAAGGACA Con:1 reps=11 [1310475,1311005] l-int=531 l-seq = 52  
 CAAAAGGACAAAACACCGTCGCATCCGGGCCCGAAATGTCCTTTTGAAGCTGC  
 CAAAAGGACAAAACACCGTTGCATCTGGTCTCGGAATGTCCTTTTGAAGCTGC  
 CAAAAGGACAAAACCGCTTGTCATCTGGGATCGGAATGTCCTTTTGAAGCAGT  
 CAAAAGGACAAAAGGAGCCGTGAACCTGAAACAAAATGTCCTTTTGAAGCTGT  
 CAAAAGGACAAAAGGAGCCGTGGACCGGAGCAAAAAGTCCTTTTGGAGTATT  
 CAAAAGGACAAAAGGAGCCGTGGACCGGAGCAAAAAGTCCTTTTGGAGTATT  
 CAAAAGGACAAAAGGAGCCGTGAACCAGAGCAAAAAGTCCTTTTGGAGTATT  
 CAAAAGGACAAAAGGAGCCGTGAACCTGAAACAAAATGTCCTTTTGAAGCTGT  
 CAAAAGGACAAAAGGAGCCGTGGACCGGAGCAAATTGTTCTTTTGGAGCATC  
 CAAAAGGACAAAAGGAGCCATTGACCGGAACAAAATGTCCTTTTGGAGTGTTCAAAAGGACA  
 > GTCTACGTTA Con:1 reps=5 [1334998,1335268] l-int=271 l-seq = 52  
GTCTACGTTAAGAAAGCAAGCAAAAACGAAGGCCTTCTTAACATAGAATGC  
 ATCTATATTAAAGTAAGCGTGAAAAAACGAAGTCCTTCTTCACATAGAGGAC  
GTCTACGTTAAGGAAGTGCGGAAAAAAGCACGGCCTTTTTCACCTAGAGGGC  
GTCTACGTTAAGGAAGCAAGCAAAAACAAAGTCCTTCTTCACTAGAGCCC  
GTCTACGTTAAGGAAGCGTGAAAAAACAAAGTCCTTCTTCACTAGAGCCTGTCTACGTTA  
 > GTTAAGGAAG Con:1 reps=5 [1568001,1568271] l-int=271 l-seq = 52  
 GTTAAGGAAGCAAGCAAAAACGAGGCTCTTCTTGACATAGAGCCCGTCTAT  
 GTTAAGGAAGCGTGGAATTTGGTGGCCTTCTTAAACATAGGGCGCATCTAC  
 GTTAAGGAAGCACGAAAAAACGAGGCTCTTCTTCACATAGACGCGTATAT  
 GTTAAGGAAGCGCGAAAAATGACGGCCTTTCTTCACATAGACGCGTCTAC  
 GTTAAGAAAGCGTGAAAAAACGAGGTTTTCTTTCATATAGAGCCTGTCTACGTTAAGGAAG  
 > GATGTTTCTT Con:1 reps=5 [1642950,1643272] l-int=323 l-seq = 52  
 GATGTTTCTTAAATGTAGAGTGCGTCTCCGTTAAGGAAGCGCGTGAAAAAAC  
 GATGTTTCTTAACGTAGAGTGCGTCTAGGTGAAGGAAGCTGGGGCAAAAGTC  
 GGTATTTCTTAACGTAGAAGGCGTCTACGTGAAAGAAGCGCGGAAAAAAGAC  
 GATGTTCTTAAATAGAGTGCGTCTACGTTAAGAAAGCAGGCGCAAAAGAC  
 GATGTTTCTTAACGTAGAAGGTGTCTACGTTAAGGAAACGCGTGAAAAAAC  
 GATGTTTCTTAACGTAGAGTGCGTCTATGTTAAGGAAGGAGCGAAAAAATTGATGTTTCTT  
 > CTTAACGTAG Con:1 reps=6 [2233857,2234179] l-int=323 l-seq = 52  
 CTTAACGTAGACCGGGGGCTATGGGAAGGAGGACTTCGTTTTTGCTTGCTTC  
 CTTAACGTAGACCGAGCTCTATGTTAAGAAAGACCTTCATTTTTTCGTGCTTC  
 CTTAACGTAGACCGAGCTCTATGTTAAGGAAGACCTTCATTTTTGCGCGCTTT  
 CTTAACTTAGACGCGTCTATGTGAAGGAAGGCCTTCGTTTTTCCAAGCTTC  
 CTTAACGTAGACACCCTCTATGTTAAGGAAGGCCTTCGTTTTTCCAAGCTTC  
 CTTAACGTAGATGGGCTCTATGTTAAGAAAGGCCTTCGTTTTTCGTGCTTCCTTAACGTAG  
 > GCTTCCTTAA Con:1 reps=9 [2251337,2251815] l-int=479 l-seq = 52  
 GCTTCCTTAACGTAGACGCGTCTACGTGAAGATAGACCGTCTTTTTTCGC  
 GCTTCCTTAACATAGACAGCTCTATGTTAAGGAACAACCTCAATTTCTTC  
 GCTTCCTTAACGTAGACGCACTCTATGTGAAGATAGACCGACTTTTTTCGC  
 GCTTCCTTAACATAGACACGTCTATGTTAAGGAACAACCTCAATTTCTTC  
 GCTTCCTTAACGTAGACGCACTCTATGTGAAGATAGACCGACTTTTTTCGC  
 GCTTCCTTAACATAGACACGTCTATGTTAAGGAACAACCTCAATTTCTTC  
 GCTTCCTTAACATAGACGCGTCTATGTAAAGAAAGGACTCATTTTTTCCAC  
 GCTTTCTTAACGTAGACGGGCTCTAGGTTAAAGAAGAGGACCATTTTCTTC  
 GCTTCCTTAACATAGACGCGCCCTATGTGAAGAAAGGCTGCCTTTTTTCCACGCTTCCTTAA  
 > GCTTCCTTAA Con:1 reps=6 [2366309,2366944] l-int=636 l-seq = 52  
 GCTTCCTTAACGTAGACGGGCTCTAGGTGAAAAAAGGCTTTCGTTTTTGCGC  
 GCTTCCTTCACGTAGACGCCCTCTAGGTGAAGGAAGAACCTCATTTTTGCGT  
 GCTTCCTTCACGTAGACGCGCCCTATGTGAAGGAAGGCCGTCTTTTTTCGC  
 GCTTTCTTAACGTAGACGCCCTCTAGGTTAAGGAAGACCTCAATTTTCGC  
 GCTTCCTTAACGTAGACGGGCTCTATGTGAAGAAAGACCTTCGTTTTTCGT  
 GCTTCCTTAACGTAGACGGGCTCTATGTGAAGAAAGACCTTCGTTTTTCGC  
 GCTTCCTTAACATAGACGGGTTCTATGTTAAGAAAGGCCTTCGTTTTTCCAT  
 CCTTCCTTAATGTAGACCGCCCTCTATGTAAAGCAAGAGCCTCGTTTTTGCTT  
 GCTTCCTTAACGTAAAGCGCCCTCTATGTAAAGAAAGGCCGTCTTTTTTCGC  
 GCTTTCTTAACGTAGACGCACTCTAGGTTAAGGAAGATCCTCAATTTTTCGC  
 GTTTCCTTAGCGTAGACAGGCTCTAGATTAAGAAAGCGCCTTGTTTTTGCTT  
 GCTTTCTTAATGTAGACAGGCTCTAGGTGAAGAAAGGCCATCTTTTTTCGTGCTTCCTTAA  
 > GATGAAGGAC Con:1 reps=4 [2375388,2375659] l-int=272 l-seq = 52  
 GATGAAGGACAAAACATAGGTCGGGGAAGCGGCATATTGTCTTTCATCGGCGG  
 GATGAAGGACAAAACAAAGGTCGACAAGCGGAATATTGTCTTCATAGGCGT  
 GATGAAGGACAAAACACCGGGCCGGCAACGGCGAATTGTCTTTCATAACTAT  
 GATGAAGGACAAAACATGGGCCCGCAACGGCGAATTGTCTTTCATAACTAT  
 GATGAAGGACAAATCACCTCCCAGCAAATAGCTAAATGTCTTTCATCGGCATGATGAAGGAC  
 > CTTAACGTAG Con:1 reps=6 [2399253,2399523] l-int=271 l-seq = 52  
 CTTAACGTAGACCGCGTCTATGTGAAGAAAGAGACTCGTTTTTGCTTGCTTC

CTTAACGTAGACGCGCTCTATGTGAAGAAAGGCCTTCATTTTTTCCGTGCTTC  
CTTAACGTAGACGCTCTCTATGTGAAGGAAGCGCCTCGTTTTTCCACCGCTTC  
CTTAACGTAGATGCACTCTATGTAAAGGAAGCGCCTCGTTTTTCCCGCGCTTC  
CTTAACGTAGATACTCTCTATGTGACCGGAAGACCTTCATTTTTTCCGCGCTTCCTTAACGTAG  
> GCTTCCTTAA Con:1 reps=6 [2405830,2406100] l-int=271 l-seq = 52  
GCTTCCTTAACGTAGACGCACCCTATGTAAAGATACGCCTTCTTTTTTCCAT  
GCTTCCTTAAATGTAGACCGTGCTCTATGTAAAGGAACCGTCTTTTTTTCAC  
GCTTCCTTAACGTAGACGCATCCTATGTAAAGAAACATTTCTTTTTTTCAC  
GCTTCCTTAACGTAGACACGCCCTATGTAAAAAAACAATGTCTTTTTTGCTC  
GCTTCCTTAACATAGACGCGCCCTATGTGAAGGAACATCTTCTTTTTTTCACCGCTTCCTTAA  
> TGTCCTTTTG Con:1 reps=6 [2412501,2412771] l-int=271 l-seq = 52  
TGTCCTTTTGAACCTCTTTAAAGGACAATTTGTGCTTTGTTTTCTCCCTGAAA  
TGTCCTTTTGAATCCCTGTAAAGGACAGTTTACGCTTCGTTTCTACCTGAAT  
TGTCCTTTTGAACCTTCTAAAGGACATTTTGCTTTTTGTCTCTCCCTGAAT  
TGTCCTTTTGGAACACGCTAAAGGACAATTTGACCTTTGTCAGTTGCCGAAA  
TGTCCTTTTGAATCCCTGTAAAGGACAATTTGCTCTTCGGCTTTCCCTAAATTGTCCTTTTG  
> TTTTCATCGGC Con:1 reps=4 [2493743,2493909] l-int=167 l-seq = 52  
TTTCATCGGCTCTATGAAGGGCAGTTCACTGTTTCCCGGCCAGTCTTTTGTT  
TTTCATCGGCTCTATGAAGGACAATTCGTCGTTTCCCGGCCAGTCTTTTGTT  
TTTCATCGGCTCTATGAAGGACAGTTTACCGTTTCATGGCCCGGTGTTTTGTCTTTTCATCGGC  
> TGTCCTTCAT Con:1 reps=7 [2511339,2511869] l-int=531 l-seq = 52  
TGTCCTTCATCGGCTGTATGAAGGACAAAATCAATGGCTCCGTGCTCCGAAT  
TGTCCTTCATCAATCCGATGAAGGACAAAATTTCAAATCCCAGAACGGCGAAA  
TGTCCTTCATAGCTGAATGAAGGACAAAATCAATGGATCCGTACCCAGAA  
TGTCCTTCATAAGCTGTATGAAGGACAAAATCAATGGCTCCATAACCACGATT  
TGTCCTGCATCAACCCGATGAAGGACAAAATTCAGATCCCAGGACGGCGAAA  
TGTCCTTCATAAAGTGAATGAAGGACAAAATCAAGGACTCCTTACCCCAAAT  
TGTCCTTCATAAGCTGTATGAAGGACAAAAACAAAGGCTCCGTGCTCCGAAT  
TGTCCTTCATCAACCCGATGAAGGACAAAATTTCAAATCCCAGAACGGCGAAA  
TGTCCTTCATAGCTGAATGAAGGATAAAATCAAGGACTCCTTACCCCAAAT  
TGTCCTTCATCGTTTTGTATGAAGGACAAAAACGTGGGCGCGCTCCCCAAATTGTCCTTCAT  
> TGAAGGACAT Con:1 reps=4 [2533354,2533520] l-int=167 l-seq = 52  
TGAAGGACATTTTATGCTTTTCAGGCACAGTGGTTTGTCTTTTCATGATCTGGA  
TGAAGGACATTTTCGCTGTTCTCGGCTCATGTTTTGTCTTTTCATCGCCCTGA  
TGAAGGACATTTTCGCCGGTTCTCGGCACGCGTTTTTGTCTTTTCATTACCTCGATGAAGGACAT  
> TTAACCGTAGA Con:1 reps=5 [2557529,2557747] l-int=219 l-seq = 52  
TTAACGTAGACGCGCTCTATGTGAAGGAAGGCCTTCGTTTTTCCACCGCTTCC  
TTAACGTAGACGCGCTCTATGTGAAGGAAGGCCTTCGTTTTTCCACCGCTTCC  
TTAACGTAGACGTGCCCTATGTGAAGGAAGACCCTCGTTTTTGCTTGCTTCC  
TTAACGTAGACGGGGTCTATGTTAAGGAAGGCCTTCGTTTTTCCATGCTTCCTTAACGTAGA  
> TTTGTCCTTT Con:1 reps=8 [2559923,2560297] l-int=375 l-seq = 52  
TTTGTCCTTTTGACGGCTTCAAAAGGACATTTTCGGGCTCGGATGCAACGTGT  
TTTGTCCTTTTGACGCTTCAAAGGGACATTTCGAGCCCGGATGCTGCTCCT  
TTTGTCCTTTTGATAGCTTCAAAAGGACATTTCAGACCCGGATGCTGCTCCT  
TTTGTCCTTTTGATAGCTTCAAAAGGACATTTTCGAGCCCGGCTGAAGCTCCT  
TTTGTCCTTTTGGCAGTTTCAAAAGGACATTTTCGGGCTGCGATGCAACGTGT  
TTTGTCCTTTTGACAGCTTCAAAAGGACATTTTTGGGCCCGGGTGAGGTCAA  
TTTGTCCTTTTGACGGCTTCAAAAGGACATTTCAGACCCGGATGCAACGTGTTTTGTCCTTT  
> TTTTGTCTTT Con:1 reps=11 [2601680,2602405] l-int=726 l-seq = 52  
TTTTGTCTTTCATAGATCCAATGAAGGACATTTCTTTCGCCCTGGTGCTCA  
TTTTGTCTTTTATAAGCTTGATGAAGGACACTTCTCTGTTATCGGTCCCTG  
TTTTGTCTTTTATAACCTTATTGAAGGACATTTCCTTGTTTCTCAGCCCGTG  
TTTTGTCTTTTCATGAACCTATGAAGGACATTTCCTTCGTCCCGGCGCCTCT  
TTTTGTCTTTTCATGAACCTATGAAGGACATTTCCTTCGTCCCGGCGCCTCG  
TTTTGTCTTTTCATGGAACCGATGAAGGACATTTCTTTCGTCTCGACTCCCCG  
TTTTGTCTTTTCATGAACCTATGAAGGACATTTCCTTCGTTCCAGAGCTTCG  
TTTTGTCTTTTATAAGCTCGATGAAGGACATTTCTTCATCCAGGCGCCTCG  
TTTTGTCTTTTATAAGCCAGTGAAGGACATTTTCTTCGTCCCGACTCCCCG  
TTTTGTCTTTTCATGAACCTATGAAGGACATTTCTTTACCTCGGCCCCTCGTTTTGTCTTT  
> GATGAAGGAC Con:1 reps=9 [2756365,2756895] l-int=531 l-seq = 52  
GATGAAGGACAAAAGGAGACGCACCCCAAGCTGAAATGTCTTCATAAACGG  
GATGAAGGACAAAAGGGAACGAACCGCGGGATGAAATGTCTTCATAAACGG  
GATGAAGGACAAAAGGGGCGAACTGCAAGCTGAAATGTCTTCATAAACGG  
GATGAAGGACAAAAGGAGGCGATCCGCGGGATGAAATGTCTTCATAACTGG  
GATGAAGGACAAAAGGGAACGAACCGCGGGATGAAATGTCTTCATAAACGG  
GATGAAGGACAAAAGGGGCGAACTGCAAGCTGAAATGTCTTCATAACAG  
GATGAAGGACAAAAGGGGCGATCCGCGGGATGAAATGTCTTCATAACAGG  
GATGAAGGACAAAAGGAGACGCACCCCAAGCTGAAATGTCTTCATAACAC  
GATGAAGGACAAAAGGGGCGATCCGCGGGATGAAATGTCTTCATAACAG  
GATGAAGGACAAAAGGAGACGCACCCCAAGCTGAAATGTCTTCATAACAG  
> AAAAGACATT Con:1 reps=18 [2756984,2757881] l-int=898 l-seq = 52  
AAAAGACATTTCAACATGGGACGGGCATGCTTTTGTCCTTTTGCGCCTTTGT  
AAAAGACATTTCAACCAGCATCGTGCACCCTTTTGTCCTTTTAAACCTCTAT  
AAAAGACATTTCGACCGGCATCGTGCACCCTTTTGTCCTTTTGAACCTTGT  
AAAAGACATTTCAACCGGCCACATGCACCCTTTTGTCCTTTTGAACCTCTGT



AAAGACA TTTCAACCGGCCACATGCACCCTTTTGTCTTTTGCGCCCTCT  
 AAAGACA TTTCAACCGGCAAAGTGCCTCTTTTGTCTTTTGAGCCTTGT  
 AAAGACA TTTCAACCGGCCAAGTGCACCCTTTTGTCTTTTGAACCTCTGT  
 AAAGACA TTTCAACCGGCCACATGCACCCTTTTGTCTTTTGAACCTCTGT  
 AAAGACA TTTCAACCGGCCACATGCACCCTTTTGTCTTTTAAACCTCTAT  
 AAAGACA TTTGACCGGCATCGTGCACCCTTTTGTCTTTTGTGCCCTATAA  
 AAAGACA TTTGACCGGCATCGTGCACCCTTTTGTCTTTTGAACCTTGT  
 AAAGACA TTTCAACCGGCAAAGTGTCCCTTTTGTCTTTTGCGCCATTGT  
 AAAGACA TTTGACCGGCCAAGTGTCCCTTTTGTCTTTTGCGCCCTCT  
 AAAGACA TTTCAACAGCTTGTGCACCCTTTTGTCTTTTGAACCTCTGT  
 AAAGACA TTTCAACCGGCCACATGCACCCTTTTGTCTTTTGTGCCCTATAA  
 AAAGACA TTTGACCGGCATCGTGCACCCTTTTGTCTTTTGCGCCATTGT  
 AAAGACA TTTGACCGGCCAAGTGTCCCTTTTGTCTTTTGCGCCCTCTAAAGACA TT  
 > TAAGACA T Con:1 reps=7 [2759662,2759984] l-int=323 l-seq = 52  
 TAAGACA TTTCAACAGCTTGTGCACCCTTTTGTCTTTTGAGCCTCTA  
 TAAGACA TTTCAACAGCTTGTGCACCCTTTTGTCTTTTGAGCCTCTA  
 TAAGACA TTTCAACCGGCCAAGTGTCCCTTTTGTCTTTTGCGCTCTA  
 TAAGACA TTTCAACCGGCCACATGCCCTTTTGTCTTTTGAACCTTG  
 TAAGACA TTTCAACCGGCAAAGTGTCCCTTTTGTCTTTTGACCTTTG  
 TAAGACA TTTCAACAGCATCGTGCACCCTTTTGTCTTTTGAGCCTATAAGACA T  
 > GTCTAATTAG Con:1 reps=5 [2867866,2868084] l-int=219 l-seq = 52  
 GTCTAATTAGCTTTTCAATTAGATAAAGCAGATGAGTGCCAAGATCATTT  
 GTCTAATTAGCGTTTCCAATTAGACAATTGCAGATGAGCGCGTGGTTCATTT  
 GTCTAATTAGAACCGCAATTGGACATTTGCAGGAGGACTGCACGCTCATTC  
 GTCTAATTAGCGTTTCTAATTAGACAATTGCAGGTGGGCGCGCGCCTTTTGTCTAATTAG  
 > CTATGTTAAG Con:1 reps=9 [2952075,2952501] l-int=427 l-seq = 52  
 CTATGTTAAGGAACAAGCAATTTTGTCTCGCTTCTTTAAGTAGACGGCT  
 CTATGTTAAGGAACAACGCTTTTGTACCTCGCTTCTCTAAAGTAGACGGCT  
 CTATGTTAAGGAACAACGCTTTTGTCTCGCTTCTTAAAGTAGACGGCT  
 CTATGTTAAGGAACAACACTTTTGTCTCGCTTCTTAAAGTAGACGCTGCA  
 CTATGTTAAGGAACAAGTCTTTTACCTCGCTTCTTTAAGTAGACGCT  
 CTATGTTAAGGAACAACACTTTTGTCTCGCTTCTTCAAGTAGACGCTACT  
 CTATGTTAAGGAACAACGCAATTTTCTCGCTTCTTAAAGTAGACGCT  
 CTATGTTAAGGAACAAGCTATTTTCTCGCTTCTTAAAGTAGACGCTCTATGTTAAG  
 > CTTAAAGTAG Con:1 reps=7 [2987594,2988175] l-int=582 l-seq = 52  
 CTTAAAGTAGCGCTTCTATGTGAAGGAAGCCTTCTTTTTCGCGCTTT  
 CTTAAAGTAGACGCTCTATGTGAAGGAAGACGCTCATTTTTCACGCTTC  
 CTTAAAGTAGACGCTCTATGTGAAGGAACAACGCACTTTTGTCTCGCTTC  
 CTTAAAGTAGGCGCACTCTATATTAAGGAAGACCTTCATTTTTCACGCTTC  
 CTTAAAGTAGACGCTCTATGTGAAGGAAGACCTCGCTTTTATCGTGCTTT  
 CTTAAAGTAGACGCTCTATATGAAGGAAGGACGCTCATTTTCTATGATTC  
 CTTAACATGACAGGCTCTATGTGAAGGAACAACGCACTTTTCTCGATTC  
 CTTAAAGTAGACGCTCTATGTGAAGGAAGACCTTCATTTTTCACGCTTC  
 CTTAAAGTAGACGCTCTATGTGAAGGAAGACCTCGTTTATCGTGCTTC  
 CTTAAAGTAGACGCTCTATGTGAAGGAAGCCTTCATTTTTCACGCTTT  
 CTTAAAGTAGACGCTCTATGTGAAGGAAGCTCTTCTTTTTCGCTTTCTTAAAGTAG  
 > TCTACGTTAA Con:1 reps=15 [3137925,3138715] l-int=791 l-seq = 52  
 TCTACGTTAAGGAAGCGTGCGAAATGCGCTTGTTCCTTAAAGTAGAGGCTA  
 TCTACGTTAAGGAAGCATGGAATAATGTCTTGTTCCTGAAAGTAGAGGCG  
 TCTACGTTAAGGAAGCATGAAAAATGGCCTCATTCTTTCGATGAAGCATG  
 TCTACGTTAAGGAAGCGTGGAATAATGGCCTCGTTTCTTAAAGTAGAGCATG  
 TCTACGTTAAGGAAGCATGAAAAATGGCCTCGTTTCTTCAAGTAGAGCATG  
 TCTACGTTAAGGAAGCGTGCGAAATGGCCTCGTTTCTTCAAGTAGAGCATG  
 TCTACGTTAAGGAAGCGTGCGAAATGGCCTCGTTTCTTCAAGTAGAGGCG  
 TCTACGTTAAGGAAGCATGAAAAATGGCCTTGTTCCTTCAAGTAGAGGCG  
 TCTACGTTAAGGAAGCATGAAAAATGGCCTCGTTTCTTCAAGTAGAGCATG  
 TCTACGTTAAGGAAGCGTGCGAAATGGCCTCGTTTCTTAAAGTAGAGGCG  
 TCTACGTTAAGGAAGCATGAAAAATGGCCTTGTTCCTTCAAGTAGAGGCG  
 TCTACGTTAAGGAAGCGCGCAAAATGGCCTTGTTCCTTCAAGTAGAGGCGTCTACGTTAA  
 > TTTTGTCTT Con:1 reps=4 [3150825,3150991] l-int=167 l-seq = 52  
 TTTTGTCTTCTTACTTCTCGATGAAAGACA TTTCCGAGCGCGAGCAAACTG  
 TTTTGTCTTCTTACTTCTGAAAGACA TTTCCGACTCAACCAACCGCC  
 TTTTGTCTTCTTACTTCTCGATGAAAGACA TTTCCAGGCTTCTTCTTCT  
 > TCGCTTCTT Con:1 reps=5 [3159024,3159294] l-int=271 l-seq = 52  
 TCGCTTCTTAAAGTAGACGCTTCTAGTTAAGATAGAGCGCAATTTCTT  
 TCGCTTCTTAAAGTAGACGCTTCTATGTGAAGGAAGACCCGATTTGCT  
 TGTCTTCTTAAAGTAGACGCTTCTATGTGAAGATAGCTGCGATTTTCT  
 TCGCTTCTTAAAGTAGACGCTTCTATGTGAAGATAGAACACAGTTTCTT  
 TCGCTTCTTAAAGTAGACGCTTCTACGTTAAGGAAGACCTGCAATTTTCTCGCTTCTT  
 > GTGAAGGAAC Con:1 reps=4 [3165204,3165422] l-int=219 l-seq = 52  
 GTGAAGGAACAACGCGCTTTTCTACTCTTCTTAAAGTAGACGCTTCTAT  
 GTGAAGGAACAACGCGCTTTTGTATGCTTCTTAAAGTAGACGCTCTAC

GTGAAGGAACAAGGCAATTTTGTCTCGCTTCCTTAACGTAGATGGCCTCTAT  
GTGAAGGAACAGCGACTTTTTTACCTCGCTTCCTTAACGTAGACAACCTCTATGTGAAGGAAC  
> TTTTGTCTTT Con:1 reps=9 [3215264,3215690] l-int=427 l-seq = 52  
TTTTGTCTTTTTGAACCTCCAAAAGGACAATTGGCCCCCGGGTCTGGCTCTC  
TTTTGTCTTTTTGAAGCCCCCAAAAGGACAATTCGAACGGATTCCAGTTCCC  
TTTTGTCTTTTTAAACCTCCAAAAGGACAATTCACCTCGGATTACAGCTCTC  
TTTTGTCTTTTTGAACCTTCAAAAGGACAATTGGCCCCAGGTCTGGCTCTC  
TTTTGTCTTTTTGAGGACTCAAAAGGACAATTCGACCGGATTCCAGTTCCC  
TTTTGTCTTTTTGAACCTCCAAAAGGACAGTTCGACCGGATTTCAATCCCC  
TTTTGTCTTTTTGAACCTCCAAAAGGACAATTCGACCGGATTCCAGCTTC  
TTTTGTCTTTTTAAAGCTCCAAAAGGACAATTGGCCCCCGGGTCTGGCTCTCTTTTGTCTTT  
> CTTAACGTAG Con:1 reps=8 [3382355,3382833] l-int=479 l-seq = 52  
CTTAACGTAGATGCGGCTATGTGAAGAAAGGCCGGCTTTTTCCCCCGCTTG  
CTTCACTTAGAGGTAGTCTATGTGAAGGAAGAGATCCTTTTTGGCTCGGTTT  
CTTAATGTGGACGCGTCTATGTTAAGAAACAAGCTCATTTTCCTCCGCTTC  
CTTAACGTAGACGCGTCTATGTTAAGAACTATCTCATTTTCCCTCGCTTC  
CTTAACGTAGACGCGTCTATGTTAAGAAACAAGCCATTTTCCTCCGCTTC  
CTTAACGTAGACGCGCTTAAGTTAAGAAACAAGCCCATTTTCCTCCGCTTC  
CTTAACGTAGACGCGTCTATGTGAAGGAAGCACCTCATTTTCCCTCGCTTC  
CTTAACGTAGACGGTCTCATGTGAAGAACTATCTCATTTTCCCTCGCTTC  
CTTAACGTAGACGCGTCTATGTTAAGAAACAAGCTCATTTTCCTCCGCTTCCTTAACGTAG  
> TTTTGGCTTT Con:1 reps=11 [3474529,3475266] l-int=738 l-seq = 52  
TTTTGGCTTTTAAAGATGTTCTAAAAGGACAGTTTGTGTTGATTACAGGCGCT  
TTTTGGCTTTTGAAGATGTTCTAAAAGGACAGTTTGGACCGCTGTCAAGGTGTC  
TTTTGGCTTTTGAAGATGTTCTAAAAGGACAATTGGCACGTTTCCCAGCACC  
TTTTGGCTTTTGAAGATGTTCTAAAAGGACAGTTTGGATGATTTCCAGGTGCA  
TTTTGGCTTTTGAAGATGTTCTAAAAGGACAGTTTGGACCGCTACCAAGGTGTC  
TTTTGGCTTTTGAAGATGTTCTAAAAGGACAATTGAACGCTGCCTAGGTTTC  
TTTTGGCTTTTGAAGATGTTCTAAAAGGACAGTTTGGATGATTTCCAGGTGCA  
TTTCGCTTTTTTGAAGATGTTCTAAAAGGACAATTGGACGCTGCCTAGGTGTC  
TTTTGGCTTTTGAAGATGTTCTAAAAGGACAATTGGCACGTTTCCCAGCATC  
TTTTGTCTTTTTGAAGATGTTCTAAAAGGACAATTGGGCTGATTTCCAGGTGCG  
TTTTGGCTTTTGAAGATGTTCTAAAAGGACAGTTTGGACCGCTACCAAGGTGTC  
TTTTGGCTTTTGAAGATGTTCTAAAAGGACAATTGAACGCTGCCTAGGTTTC  
TTTTGGCTTTTGAAGATGTTCTAAAAGGACAGTTTGGATGATTTCCAGGTGCA  
TTTCGCTTTTTTGAAGATGTTCTAAAAGGACAATTGGACGCTGCCTAGGTTTC  
> ATGAAGGACA Con:1 reps=7 [3475558,3475933] l-int=376 l-seq = 52  
ATGAAGGACAAAACAGAGACCATCTCCCGACCCCAAATGTCTTTCATCCCGCTCC  
ATGAAGGACAAAACAACTCGCCATAACCTAAAATGTCTTTCATTCACCCCG  
ATGAAGGACAAAATCAAGGACATTACAGACCCCAAATGTCTTTCATCTGCCCA  
ATGAAGGACAAAACAACTCACCATAACCTAAAATGTCTTTCATTCACCCA  
ATGAAGGACAAAATCAAGGACATCACAGAGCCCAAATGTCTTTCATCTGCCCC  
ATGAAGGACAAAATAAAGTCGCCACAACCCCAAATGTCTTTCATGCGCCAG  
> CTATGTGAAG Con:1 reps=6 [3502875,3503248] l-int=374 l-seq = 52  
CTATGTGAAGGAAGACCTTCATTTTTCCGTGCTTCCTAACGTAGACAGCCT  
CTATGTGAAGGAAGGCCGTCAATTTTTTGTCTTCCTTAACATAGACACGCC  
CTAGGTTAAGGAAGGCCTTCATTTTCTGCGCTTCCTTAACGTAGACGCCT  
CTATGTGAAGGAAGGCCTTCGTTTTTTCGTGTTTCCTTAACGTAGACAGCCT  
CTATGTAAAGGAACACGTCATTTTTTCACGCTTCCTTAACTTAGACGCGAC  
CTATGTGAAGGAAGGCCTTCAATTTTCGCGCTTCCTTAACGTAGACGGGCT  
CTATGTGAAGGAAGACCTTCATTTTTCCGTGCTTCCTTAGCGTAGACGCGCCCTATGTGAAG  
> GTTAAGGAAG Con:1 reps=6 [3514468,3514791] l-int=324 l-seq = 52  
GTTAAGGAAGAGACTCATTTTTCACCGCGTTCTTAACGTAGACGCGTTCTAA  
GTTAAGGAAGGAACCCATTTTCCTCCGTTTCCTTAACGTAGACGCGTTCTAG  
GTTAAGGAAGGAACCCATTTTCCTTCGCTTCTTAACGTAGAAGCACTCTAG  
GTTAAGGAAGAGACCCATTTTCCTTCGCTTCCTTAACGTAGGCGCACTCTAG  
GTTAAGGAAGACCTCATTTTTCCTTCGCTTCCTTAAATGTAGACGCGCTCTAG  
> GCTTCCTTAA Con:1 reps=8 [3567366,3567793] l-int=428 l-seq = 52  
GCTTCCTTAACGTAGACAGGCTCTAGGTTGAAGAAAGCGCCTCGTTTTTGTCTT  
GCTTCCTTAACGTAGACGCACTCTATGTGAAGGAAGACCTTCGTTTTTCTAC  
GCTTCCTTAACGTAGACGCACTCTATGTGAAGGAAGACCTTCGTTTTTCCGC  
GCTTCCTTAACGTAGACGCACTCTATGTGAAGGAAGACCTTCGTTTTTCTAC  
GCTTCCTTAACATAGACGAGCTCTACGTGAAGGAAGGTCGCCTTTTTTCCAC  
GCTTCCTTAACATAGACAGGCTCTACGTGAAGGAAGACCTTCATTTTCCAC  
GCTTCCTTAACATAGACGGGCTCTAGGTGAAGAAAGCGCCTCGTTTTTGTCTT  
GCTTCCTTAACGTAGACGGGCTCTACGTGAAGGAAGGCCTTCGTTTTTCTGCGCTTCCTTAA

***B.alkalitelluris* (NZ KV917374.1). All tandem repeats with repeat 51-52**

Practically all tandem repeats have two short palindromic signals in each 52 nt repeat. There are three main signals, shown in different colors:

AAAqGGAAT, AAAGCTGTC, AATCATAG

Only part of the repeat is highlighted.

```
> GCTGTCCGAA Con:1 reps=14 [115528,116213] l-int=686 l-seq = 52
```

**GCTGTC**CGAAGTTGGTTGAGGTTCA**GACAGC**TTGAGGATCAAAGAGAGAAA  
**GCTGTC**CGAACTTGGCTGAGGTTCA**GACAGC**TTGGGAGACACAAGAGAGAAA  
**GCTGTC**CGAACTTGGCTGAGGTTCA**GACAGC**TTGAGGATCAAAGAAAGAAA  
**GCTGTC**CGAATTAGCTAAGGTTCA**GACAGC**TTAAGGATCAAAGAGGGAAA  
**GCTGTC**CGAACTTGGATGAGGTTCAAACAGCTTGAGGGGAGAAACAGATAAA  
**GCTGTC**CGAACTTAGCTTAGGTTCA**GACAGC**TTGAGGGGAGAAAACAGATAAA  
**GCTGTC**CGAACTTGGCTTAGGTTCA**GACAGC**TTGGGAGACAAAAGAGAGAAA  
**GCTGTC**CGAACTTGGCTGAGGTTCA**GACAGC**TTGGGAGACACAAGAGAGAAA  
**GCTGTC**CGAACTTGGCTGAGGTTCA**GACAGC**TTAAGGATCAAAGAGGGAAA  
**GCTGTC**CGAACTTAGCTTAGGTTCA**GACAGC**TTGAGGGAGAACACAGAGAAA  
**GCTGTC**CGAACTTGGCTGAGGTTCA**GACAGC**TTAAGGCTCAAAGAGGGAAA  
**GCTGTC**CGAACTTAGCTTAGGTTCA**GACAGC**TTGAGAAAGAAAACAGATAAA  
**GCTGTC**CGAACTTGGCTGAATTCA**GACAGC**TTGAACGAGAAAACATGTAAT**GCTGTC**CGAA

```
> ACTTCAGACA Con:1 reps=8 [123004,123378] l-int=375 l-seq = 52
```

ACTTCAGACAACTTCTGCAACCAAGAACCTAAAGCTGTCTCGAAGCTCTTGCCCT  
ACTTCAGACAACTTCTGTGCGCAATTGCTTAAACCTGTCCGAAGCTCTTGCCCT  
ACTTCAGACAACTTCTGCCGCCAATTGCTTAAACCTGTCCGAAGCTCTTGCCCT  
ACTTCAGACAACTTCTGCCGCCAATTACTTAAACCTGTCCGAAGCTCTTGCCCT  
ACTTCAGACAACTTCTGCCGCCAATTACTTAAACCTGTCCGAAGCTCTTAACT  
ACTTCAGACAGCTTTACCAGACCAATTACCTAAAGCTGTCTCGAAGCTCTTGCCCT  
ACTTCAGACAACTTCTCAGCAACCAAGAACCTAAAGCTGTCTCGAAGCTCTTGCCCTACTTCAGACA

```
> GAGCAACTTG Con:1 reps=9 [208479,209009] l-int=531 l-seq = 52
```

GAGCAACTTGATCGTAGAACTCCTATGATTCACTTCCCTACAATTAATGTGC  
GAGCAACTTGATGATAGACCTACTATGATTGACTTCCCTTCAAATCATGTGC  
GAGCAACTTGATGATAGACCTACTATGATTGACTTCCCTTCAAATCATGTGC  
GAGCAACTTGATCGTAGACCTCCTATGATTCACTTCCCTACAATTCATGTGC  
GAGCAACTTGATCATAGAACCTCTTGATTCACTTCCCTACAATTCATGTGT  
GAGCAACTTGATCATAGAACCTCCTATGATTCACTTCCCTACAATTAATGTGC  
GAGCAACTTGATCATAGACCTCCTATGATTCACTTCCCTACAATTAATGTGC  
GAGCAACTTGGTCATAGACCTCCTATGATTCACTTACCTATAATTAATGTGC  
AAGCAACTTGATCATAGACCTCCTATGATTCACTTCCCTACAATTAATGTGC  
GAACAACCTTGATCATAGACCTCCTATGATTCACTTCCCTACAATTCATGTGCGAGCAACTTG

```
> CTTTCGGACAG Con:1 reps=14 [287166,287852] l-int=687 l-seq = 52
```

CTTTCGGACAGCTTTAAAGGCTTGGCTCCTCAACCTGTCTGAACCTACTCTGA  
CTTTCGGACAGCCTTAACCGCTGGACTCCTCAACCGGTCTGAACCTACTCTAT  
CTTTCGGACAGCTTTTCCCGTGTGGCTCCTCAACCTGTCTGAACCTACTCTGA  
CTTTCGGACAGCTTTAACCGCTGGACTCCTCAACCTGTCTGAACCTACTCTAT  
CTTTCGGACAGCTTTTCCCGTGTGGCTCCTCAACCTGTCTGAACCTACTCTAT  
CTTTCGGACAGCTTTTCCCGTTTGGCTCCTCAACCTGTCTGTACTTACTCTGA  
CTTTCGGACAGCTTTAACCGCTGGACTCCTCAACCTGTCTGAACCTACTCTGA  
CTTTCGGACAGCTTTAACCGCTTGGCTCCTCAACCTGTCTGAACCTACTCTGA  
CTTTCGGACAGCCTTAACCGCTGGACTCCTCAACCGGTCTGAACCTACTCTAT  
CTTTCGGACAGCTTTTCCCGTGTGGCTCCTCAACCTGTCTGAACCTACTCTGA  
CTTTCGGACAGCCTTAACCGCTGGACTCCTCAACCGGTCTGAACCTACTCTAT  
CTTTCGGACAGCTTTTCCCGTGTGGCTCCTCAACCTGTCTGTACTTACTCTGA  
CTTTCGGACAGCCTTAACCGCTGGACTCCTCAACCGGTCTGAACCTACTCTGA

```
> TGTTTGATTC Con:1 reps=11 [341445,341974] l-int=530 l-seq = 52
```

TGTTTGATT CCCTTT CTCATGCCAAAGCCCAAC AAAGGG AATGAAAGGCAC  
TGTTTGATT CCCTTT CTCATGCAAAAATCCAAC AAAGGG AATGAAAGGCAT  
TGTTTGATT CCCTTT CTCATGCCAAAAGCCCAAC AAAGGG AATGAAAGGCAT  
TGTTTGATT CCCTTT CTCATGTCAAAAGCCCAAC AAAGGG AATGAAAGGCAT  
TGTTTGATT CCCTTT CTCATGCCAAAAGCCCAAC AAAGGG AATGAAAGGCAT



[illegible]

AAGGGAATCAGACAGCGTCTTTCGTTCCCTTTCTTCGACTTTTGGCATCAA  
AAGGGAATCAGACAGCGCCTTTCGTTCCCTTTCTTCGACTTTTGGCACCAA  
AAGGGAATCAGACAGCGTCTTTCGTTCCCTTTCTTTGACTTTTGGCATCAA  
AAGGGAATCAGACAGCGTCTTTCGTTCCCTTTCTTTGACTTTTGGCACCAA  
AAGGGAATCAGACAGCGCCTTTCGTTCCCTTTCTTCGACTTTTGGCACCAA  
AAGGGAATCAGACAGCGTCTTTCGTTCCCTTTCTTCGACTTTTGGCATCAA  
AAGGGAATCAGACAGCGCCTTTCGTTCCCTTTCTTCGACTTTTGGCATCAA  
AAGGGAATCAGACAGCGCCTTTCGTTCCCTTTCTTTGACTTTTTCGCACCACT  
AAGGGAATCAGACAGCGCCTTTCGTTCCCTTTCTTCGACTTTTGGCACCAA  
AAGGGAATCAGACAGCGTCTTTCGTTCTGCTTTCTTCGACTTTTGGCATCAA  
AAGGGAATCAGACAGCGTCTTTCGTTCCCTTTCTTTGACTATTGGCACCAA  
AAGGGAATCAAACAGCGCCTTTCGTTCCCTTTCTTTGACTTTTGGCACCAA  
AAGGGAATCAGACAGCGCCTTTCGTTCCCTTTCTTTGAATTTTGGCATCAA  
AAGGGAATCAGACAGCGTCTTTCGTTCCCTTTCTTCGACTTTTGGCATCAA  
AAGGGAATCAGACAGCGCCTTTCGTTCCCTTTCTTCGACTTTTGGCATCAA  
AAGGGAATCAGACAGCGCCTTTCGTTCCCTTTCTTCGACTTTTGGCATCAA  
AAGGGAATCAGACAGCGTCTTTCGTTCCCTTTCTTCGACTTTTGGCATCAA  
AAGGGAATCAGACAGCGTCTTTCGTTCCCTTTCTTCGACTTTTGGCACCAA  
AAGGGAATCAAACAGCGTCTTTCGTTCCCTTTCTTTGACTTTTGGCATCAAAAGGGAATCA  
> AGGGAATCAA Con:1 reps=5 [991762,991980] l-int=219 l-seq = 52  
AGGGAATCAAAGAGTGTGTCTGATTCCCTTTTTGAAGCCAAAAGCCTTGAA  
AGGGAATCAAAGAGTGTCTGATTCTTTCTGATGCCAGAAGCCTGAGAA  
AGGGAATCAAAGAGTGTGTCTGATTCTTTCTGATGCCAGAAGCCTGAGAA  
AGGGAATCAAAGAGTGTGTCTGATTCTTTCTGATGCCAGAAGCCTGGAAAAGGGAATCAA  
> AAGGTTTCGGA Con:1 reps=17 [995262,996156] l-int=895 l-seq = 52  
AAGGTTTCGGACAGCTTTTGTTCGAAGGCTCATGAAGTTGTCCGAAGTCGCTT  
AAGGTTTCGACAAATTTTGCTTGATGGCCCTCGAAGTTGTCCGAAGAGGGCA  
AAGGTTTCGGACAGCTTTAGCTCGAAGGCCCTCGAAGTTGTCCGAAGTCGCTC  
AAGGTTCAGACAGCTTAAGCTTGAAGGCCCTCGAAGTTGTCCGAAGATGCCC  
AAGGTTTCGGACAGCTTTTGCTCAATGGCCCTTGAAGTTATCCGAAGAGGGCA  
AAGGTTTCGGACAGCTTTAGCTTGATGGCCCTCGAAGTTGTCCGAAGTCGCTC  
AAGGTTTCGGACAGCTTTTGCTTGAAGGCCCTCGAAGTTGTCCGAAGAGGCC  
AAGGTTTCGGACAGCTTTTGCTCGAAGGCTCATGAAGTTGTCCGAAGTCGTCC  
AAGGTTTCGGACAGCTTTTGTTTGAAGGCTCATGAAGTTGTCCGAAGTTGCTC  
AAGGTTTCGGACAGCTTTAGCTTGATGGCCCTCGAAGTTGTCCGAAGAGGGCA  
AAGGTTTCGGACAGCTTTAGCTCGAAGGCCCTCGAAGTTGTCCGAAGTCGCTC  
AAGGTTTCGGACAGCTTAAGCTTGAAGGCCCTCGAAGTTGTCCGAAGATGCCC  
AAGGTTTCGGACAGCTTTTGCTCAATGGCCCTTGAAGTTATCCGAAGTCGTCC  
AAGGTTTCGGACAGCTTTAGCTTGATGGCCCTCGAAGTTGTCCGAAGAGGCC  
AAGGTTTCGGACAGCTTTTGCTCGAAGGCTCATGAAGTTGTCCGAAGTCGCCC  
AAGGTTTCGGACAGCTTTTGCTCGGAGGCTCATGAAGTTGTCCGAAGTCGTCC  
AAGGTTTCGGACAGCTTTTGCTCGAAGGCTCATGAAGTTGTCCGAAGTGGTTCAAGGTTTCGGA  
> TGTCCGAAGT Con:1 reps=13 [1098526,1099160] l-int=635 l-seq = 52  
TGTCCGAAGTTGGCTGGAGTTCAGACAGCTTTAAGGTTTGGCAGCAGAAGC  
TGTCCGAAGTTGATTAGAGTTCAGACAGCTTTAAGTGTTTGGAAGCAGAAGC  
TGTCCGAAGTTGGTTAGAGTTTCAGACGGCTTTAGGGGTTTGGGAAGCAAAAGT  
TGTCCGAAGTTGCTCTGAGTTTCAGACAGGTTTAGGGGTTTGGGAAGCAAAAGC  
TGTCCGAAGTTGCTCTGAGTTTCAGACAGGTTTAGGGGTTTGGGAAGCAAAAGC  
TGTCCGAAGTTGCTCTGAGTTTCAGACAGGTTTAGGGGTTTGGGAGCAAAAGC  
TGTCCGAAGTTGCTCTGAGTTTCAGACAGGTTTAGGGGTTTGGGAAGCAAAAGC  
TGTCCGAAGTTGCTCTGAGTTTCAGACAGGTTTAGGGGTTTGGGAAGCAAAAGC  
TGTCCGAAGTTGCTCTGAGTTTCAGACAGGTTTAGGGGTTTGGGAAGCAAAAGC  
TGTCCGAAGTTGCTCTGAGTTTCAGACAGGTTTAGGGGTTTGGGAAGTAAAAGC  
TGTCCGAAGTTGCTCTGAGTTTCAGACAGGTTTAGGGATTGTGAAGTAAAACC  
TGTCCGAAGTTGGCTAGAGTTTCAGACAGTTTAAGTGTTTGGTCCCAAAAGCCTGTCCGAAGT  
> TGTCTGAAGT Con:1 reps=13 [1309331,1310018] l-int=688 l-seq = 52  
TGTCTGAAGTTGAGAGGCCTTCGGACAGGTTAGAAGCCACAAATGAAAAGC  
TGTCTGAAGTTGGGTAGCCTTTGGACAGGTTAGAAGCCTACAGAGTAAAAGC  
TGTCTGAAGTTGAGCAGCCTTTGGACAGGTTAGAAGCCTACAGAGTAAAAGT  
TGTCTGAAGTTGAGCAGCCTTTGGACAGGTTAGAAGCCTACAGAGTAAAAGT  
TGTCTGAAGTTGAGCAGCCTTCGGACAGGTTAGAAGCCTACAGAGTAAAAGC  
TGTCTGAAGTTGGGTAGCCTTCGGACAGGTTAGAAGCCTACAGAGTAAAAGC  
TGTCTGAAGTTGAGAGGCCTTCGGACAGGTTTCATAGCCTACAGAGTAAAAGT

TGTCTGAAGTTGGGTAGCCTTCGGACAGGTTAGAAGCCTACAGAGTAAAAGC  
 TGTCTGAAGTTGAGAGGCCCTTCGGACAGGTTAGAAGCCTACAGAGTAAAAGC  
 TGTCTGAAGTTGAGAGGCCCTTCGGACAGGTTAGAAGCCTACAGAGTAAAAGT  
 TGTCTGAAGTTGAGAGGCCCTTCGGACAGGTT**CATAG**CCCTACAGAGTAAGAGT  
 TGTCCGAAGTTGAGCAGCCTTCGGACAGGTTAGAAGCCTACAGAGTAAAAGTTGTCTGAAGT  
 > TGTTTGATT Con:1 reps=5 [1336769,1336987] l-int=219 l-seq = 52  
 TGTTTGATTCCCTTACTAATGCCCAAAGCCCAAC**AAAGGG**AATGAAAGGCAC  
 TGTTTGATT**CCCTTT**CTCATGCCCAAAGCCCAAC**AAAGGG**AATGAAAGGCAC  
 TGTTTGATT**CCCTTT**CTCATGCCCAAAGCCCAAC**AAAGGG**AATGAAAGGCAT  
 TGTTTGATT**CCCTTT**CTCATGCCCAAAGCCCAAC**AAAGGG**AATGAAAGGCATTGTTTGATT  
 > **CAAAGGG**AAT Con:1 reps=5 [1400861,1401079] l-int=219 l-seq = 52  
**CAAAGGG**AATAAAAAGCGTTGTTTCATT**CCCTTT**CTCATGCACAAAGCTCAA  
**CAAAGGG**AATGAAAAGCATTGTTTCATTCTTTTCTCATGCCAAAAGCTATC  
**CAAAGGG**AATGAAAACCATTGTTTCATTCTTTTCTCATGCCAAAAGCTATC  
**CAAAGGG**AATGAAAAGCATTGTTTCATTCTTTTCTCATGCCAAAAGCTATCC**AAAGGG**AAT  
 > TTTGGCATGA Con:1 reps=10 [1412262,1412738] l-int=477 l-seq = 52  
 TTTGGCATGAG**AAAGGG**AATGAAACAATGCTTTTCATT**CCCTTT**GGTAGGCT  
 TTTGGCATGAG**AAAGGG**AATCAGACAACCTCTTTCATT**CCCTTT**GTTGGGCT  
 TTTGGCATGAG**AAAGGG**AATCAGACAACCTCTTTCATT**CCCTTT**GTTGGGCT  
 TTTGGCATGAG**AAAGGG**AATCAAACAAGCTTTTCATT**CCCTTT****CATAG**GCT  
 TTTGGCATGAG**AAAGGG**AATCAAACAAGCTTTTCATT**CCCTTT**GTTAGGCT  
 TTTGGCATGAG**AAAGGG**AATCAAACAACCTCTTTCATTCCCTG**TCATAG**GCT  
 TTTGGCATGAG**AAAGGG**AATCAAACAATGCTTTTTCATT**CCCTTT**GTTGGGCT  
 TTTGGCATGAG**AAAGGG**AATCAGACAACCTCTTTCATT**CCCTTT**GTTGGGCT  
 TTTGGCATGAG**AAAGGG**AATCAAACAATGCTTTTTCATT**CCCTTT**GTTGGGCTTTGGCATGA  
 > AAG**GCTGTC**CG Con:1 reps=20 [1511589,1512587] l-int=999 l-seq = 52  
 AAG**GCTGTC**CGAAGAGAGCTCAGGTT**CAGACAGGTTTGCTCTGGTTAAGTAGA**  
 AAG**GCTGTC**CGAAGAGAGTTCAGGTT**CAGACAGGTTTGCTCTGGTTAAGTAGA**  
 AAG**GCTGTC**CGAAGAGAGTTCAGGTT**CAGACAGGTTTGCTCTGGTTT**AGTGGA  
 AAG**GCTGTC**CGAAGAGAGCTCAGGTT**CAGACAGGTTTGCTCAGGTTGAGTGGA**  
 AAG**GCTGTC**CGAAGAGAGTTCAGGTT**CAGACAGGTTTGCTCTGGTTAAGTAGA**  
 AAG**GCTGTC**CGAAGAGAGCTCAGGTT**CAGACAGGTTTGCTCAGGTTGAGTAGA**  
 AAG**GCTGTC**CGAAGAGAGTTCAGGTT**CAGACAGGTTTGCTCAGGTTGAGTGGA**  
 AAG**GCTGTC**CGAAGAGAGCTCAGGTT**CAGACAGGTTTGCTCAGGTTGAGTAGA**  
 AAG**GCTGTC**CGAAGAGAGCGCAGGTT**CAGACAGGTTTGCTCTGGTTAAGTAGA**  
 AAG**GCTGTC**CGAAGAGAGCTCAGGTT**CAGACAGGTTTGCTCAGGTTGAGTAGA**  
 AAG**GCTGTC**CGAAGAGAGTTCAGGTT**CAGACAGGTTTGCTCAGGTTAAGTAGA**  
 AAG**GCTGTC**CGAAGAGAGCTCAGGTT**CAGACAGGTTTGCTCAGGTTGAGTAGA**  
 AAG**GCTGTC**CGAAGAGAGCGCAGGTT**CAGACAGGTTTGCTCTGGTTAAGTAGA**  
 AAG**GCTGTC**CGAAGAGAGCTCAGGTT**CAGACAGGTTTGCTCAGGTTGAGTAGA**  
 AAG**GCTGTC**CGAAGAGAGCGCAGGTT**CAGACAGGTTTGCTCTGGTTAAGTAGA**  
 AAG**GCTGTC**CGAAGAGAGCTCAGGTT**CAGACAGGTTTGCTCAGGTTGAGTAGA**  
 AAG**GCTGTC**CGAAGAGAGCGCAGGTT**CAGACAGGTTTGCTCTGGTTAAGTAGA**  
 AAG**GCTGTC**CGAAGAGAGCTCAGGTT**CAGACAGGTTTGCTCAGGTTGAGCGGG**  
 AAG**GCTGTC**CGAAGAGAGTTCAGGTT**CAGACAGGTTTGCTCAGGTTGAGTGGA**  
 AAG**GCTGTC**CGAAGAGAGCTCAGGTT**CAGACAGGTTAGCTCAGGTTGAGTGGA****AAGCTGTCCG**  
 > TTTCGTTCCC Con:1 reps=26 [1602707,1604017] l-int=1311 l-seq = 52  
 TTTCGTT**CCCTTT**CATGGGCTATTGGTGTGGG**AAAGGG**AATCAGAGAACAGC  
 TTTCGTT**CCCTTT**CATGGGCTATTGGTGTGGG**AAAGGG**AATCAGAGAACAGC  
 TTTCGTT**CCCTTT**CATGGGCTTTGGGTATGAG**AAAGGG**AATCAGAGAACAGC  
 TTTCGTT**CCCTTT**CATGGGCTATTGGTGTGGG**AAAGGG**AATCAGAGAACAGC  
 TTTCGTT**CCCTTT**CATGGGCTATTGTGTGGG**AAAGGG**AATCAGAGAACAGC  
 TTTCGTT**CCCTTT**CATGGGCAATTGGTATGGG**AAAGGG**AATCAGCCAGCATC  
 TTTCGTT**CCCTTT**CATGGGCTTTGGGTGTGGG**AAAGGG**AATCAGAGAACAGC  
 TTTCGTT**CCCTTT**CATGGGCTATTGGTGTGGG**AAAGGG**AATCAGAGAACATC  
 TTTCGTT**CCCTTT**CATGGGCTTTGTGTGTGGG**AAAGGG**AATCAGAGAACATC  
 TTTCGTT**CCCTTT**CATGGGCTATTGGTGTGGG**AAAGGG**AATCAAACACGACC  
 TTTCGTT**CCCTTT**CATGGGCTTTGTGTGTGGG**AAAGGG**AATCAGAGAACATC  
 TTTCGTT**CCCTTT**CATGGGCTTTGGGTGTGGG**AAAGGG**AATCAGAGAACATT  
 TTTCGTT**CCCTTT**CATGGGCTATTGGTGTGGG**AAAGGG**AATCAGAGAACATC  
 TTTCGTT**CCCTTT**CATGGGCTTTGTGTGTGGG**AAAGGG**AATCAGAGAACATC  
 TTTCGTT**CCCTTT**CATGGGCAATTGGTGTGGG**AAAGGG**AATCAAACACGACC  
 TTTCGTT**CCCTTT**CATGGGCTTTGGGTATGGG**AAAGGG**AATCAGAGAACATC  
 TTTCGTT**CCCTTT**CCGGGGCGATTGGTGTGGG**AAAGGG**AATGAAAACACGACC  
 TTTCGTT**CCCTTT**CATGGGCGTTGGGTATGGG**AAAGGG**AATCAGAGAACATC

TTTCGTTCCCTTTCCGGGCGATTGGTGTGGGAAGGGGAATGAAACACGACC  
TTTCGTTCCCTTTTCATGGGCGTTGGGTATGGGAAGGGGAATCAGAGAACATC  
TTTCGTTCCCTTTTCATGGGCTTTGGGGGTGGGAAGGGGAATCAGAGAACATC  
TTTCGTTCCCTTTTCATGGGCTTTGTGTGTGGGAAGGGGAATCAGAGAACATC  
TTTCGTTCCCTTTTCATGGGCTATTGGTGTGGGAAGGGGAATCAAACACGACC  
TTTCGTTCCCTTTTCATGGGCTTTGGGTATGGGAAGGGGAATCAGAGAACATCTTTCGTTCCC  
> GAGAAAGGGA Con:1 reps=9 [1747684,1748108] l-int=425 l-seq = 52  
GAGAAAGGGGAATCAAACAACGTCTTTCGTTCCCTTGCACCGGTGTTTGGCGG  
GAGAAAGGGGAATCAAACAACGTCTTTCGTTCCCTTGCACCGGCTTTTGGCGA  
GAGAAAGGGGAATGAAACAGCGCCTTTTCGTTCCCTTGCACCGGCTTTTGGCAA  
GAGAAAGGGGAATGAAACAGCGCCTTTTCGTTCCCTTGCACCGGCTTTTGGCAA  
GAGAAAGGGGAATGAAACAGCGCCTTTTCGTTCCCTTGCACCGGCTTTTGGCAA  
GAGAAAGGGGAATCAGACACCGCCTTTTCGTTCCCTTGCACCGGCTTTTGGCGA  
GAGAAAGGGGAATCAAACAACGTCTTTCGTTCCCTTCCGACGGCTTTTGGCAAGAGAAAGGGA  
> CTTCTATGAT Con:1 reps=4 [1932894,1933060] l-int=167 l-seq = 52  
CTTCTATGATCCAGTTGTCTGAGGCGAAAAACAAGAAGGAAGTGAAATCATAGTC  
CTTCTATGATCCAGTTGCCGAAGTGAAAAACAAGAAGGAAGTGAAATCATAGGC  
CTTCTATGATCCAGTTGCCGAAGTGAAAAATAAGGAGGAAATGTAATCATAGGGCTTCTATGAT  
> GACAGCTTTG Con:1 reps=20 [1958292,1959394] l-int=1103 l-seq = 52  
GACAGCTTTTGGTTAGATCTAATAGAAAGTTGTCCGAACCTGGGCAGACTTCG  
GACAGCTTTTGGTTAGATTTACGAGATAGCTGTCCGAACCTGGGTAGACTTCG  
GACAGCTTTTGGTTAGATCTAATAGAAAGTTGTCCGAACCTAAGTAGACTTCG  
GACAGCTTTTGGTTAGATCTAATAGAAAGTTGTCCGAACCTAAGTAGACTTCGG  
ACAGCTTTTAGTCTATACAACAAAAAGCTGTCCGAACACAGGTGTACTTCA  
GACAGCTTTTGTGTCTAACAACAAGAAAGCTGTCCGAACCTAGGTAGACTTCG  
GACAGCTTTTGGCAATATCAACAAGAAAGCTGTCCGAACCCAGGCGCACTTCA  
GACAGCTTTTGGCTAGATCAACAAGAAAGCTGTCCGAACCAAGGTAGACTTCA  
GACAGCTTTTGGCTCATAACAACAAAAAGCTGTCCGAACCTAGGTAGACTTCG  
GACAGCTTTTGGCTCATAACAACAAAAAGCTGTCCGAACACAGGTGTACTTCA  
GACAGCTTTTGTGTCTAACAACAAGAAAGCTGTCCGAACCTAGGTAGACTTCG  
GACAGCTTTTGGCTAATCAACAAGAAAGCTGTCCGAACCTAGGTAGACTTCG  
GACAGCTTTTGGCAATAACAACAAGAAAGCTGTCCGAACCTAGGTAGACTTCG  
GACAGCTTTTGGCAATAACAACAAGAAAGCTGTCCGAACCTAGGTAGACTTCG  
GACAGCTTTTGGTAATAACAACAAGAAAGCTGTCCGAACCTAGGTAGACTTCG  
GACAGCTTTTGGCAATATCAACAAGAAAGCTGTCCGAACCTAGGCGCACTTCA  
GACAGCTTTTGGCTAAATCAACAAGAAAGCTGTCCGAACCTAGGTAGACTTCG  
GACAGCTTTTGGCTAGATCAACAAGAAAGCTGTCCGAACCCAGGCGCACTTCA  
GACAGCTTTTGGCTAAATCAACAAGAAAGCTGTCCGAACCCAGGCGCACTTCA  
GACAGCTTTTGGCTAAATCAACAAGAAAGCTGTCCGAACCAAGGTAGGCTTCG  
GACAGCTTTTGGCTCATAACAACAAAAAGCTGTCCGAACACAGGTGTACTTCA  
GACAGCTTTTGTGTCTAACAACAAGAAAGCTGTCCGAACCCAGGCGCACTTCAAGACAGCTTTG  
> AAGCTGTCCG Con:1 reps=6 [1960889,1961159] l-int=271 l-seq = 52  
AAGCTGTCCGAACCTAGGTAGACTTCGAGACAGCTTTTGGCAATATCAACAAGA  
AAGCTGTCCGAACCTAGGCGCACTTCAAGACAGCTTTTGGCTAAATCAACAAGA  
AAGCTGTCCGAACCTAGGTAGACTTCGAGACAGCTTTTGGCTAGATCAACAAGA  
AAGCTGTCCGAACCAAGGTAGACTTCGAGACAGCTTTTGGCTATATCAACAAGA  
AAGCTGTCCGAACCCAGGCGCACTTTAGACAGCTTTTGGCTAAATCAACTAAGAAAGCTGTCCG  
> AAGCTGTCCG Con:1 reps=19 [1988468,1989414] l-int=947 l-seq = 52  
AAGCTGTCCGAACCCAAGGTGACTTCAAGACAGCTTTTAGCGAGAAATGAAGTC  
AAGCTGTCCGAACCCAAGGTGACTTCAAGACAGCTTTTAGCGAGAAAGCGATAA  
AAGCTGTCCGAACCCAAGGCAACTTCAGACAGGTTTAGCAAGAAATGAAGTC  
AAGCTGTCCGAACCCAGGGCAACTTCGGACAACCTTTAGCAAGAAATGAAGTC  
AAGCTGTCCGAACCCAAGGCAACTTCAGACAGCTTTTAGCGAGAAAGCGATAA  
AAGCTGTCCGAACCCAAGGCAACTTCAGACAGGTTTAGCGAGAAATGAAGTC  
AAGCTGTCCGAACCCAGGGCAACTTCGGACAACCTTTAGCAAGAAATGAAGAC  
AAGCTGTCCGAACCCAGGGCAACTTCGGACAACCTTTAGCAAGAAATGAAGAC  
AAGCTGTCCGAACCCAGGGCAACTTCAGACAGATTTAGCAGAGAAAGCGATAA  
AAGCTGTCCGAACCCAAGGCAACTTCAGACAGGTTTAGCAAGAAATGAAGTC  
AAGCTGTCCGAACCCAAGGTGACTTCAAGACAGCTTTTAGCGAGAAATGAAGTC  
AAGCTGTCCGAACCCAAGGCAACTTCAGACAGGTTTAGCAAGAAATGAAGTC  
AAGCTGTCCGAACCCAAGGTGACTTCAAGACAGCTTTTAGCGAGAAATGAAGTC

AAGCTGTC CGAACCCAGGGCAACTTCAGACAGATTTAGCGAGAAAGCGATAAAA GCTGTCCG  
 > GTTCAGACAG Con:1 reps=21 [2030290,2031340] l-int=1051 l-seq = 52  
 GTTCAGACAGCTTTTAGCGTTTGTAGTTGAGAA GCTGTCCGAAGTAGAGCAAG  
 GTTCAGACAGCTTTTAGCTGTGTTGAGTTGAGAA GCTGTCCGAAGTAGAGCAAG  
 GTTCAGACAGCTTTTAGCGTCTGAGTTGAAAA GCTGTCCGAAGTAGAGCAAG  
 GTTCAGACAGCTTTTAGTGTGTTGGCTCCGAAA GCTGTCCGAAGTAGAGCAAG  
 GTTCAGACAGCTTTTAGCGTTTGTAGTTGAAAA GCTGTCCGAAGTAGAGCAAG  
 GTTCAGACAGCTTTTAGTGTGTTGGCTCCGAAA GCTGTCCGAAGTAGAGCAAG  
 GTTCAGACAGCTTTTAGCGTCTGGCTCGAAAA GCTGTCCGAAGTCGTGCGAG  
 GTTCAGACAGCTTTTAGCGTCTGAGTTGAGAA GCTGTCCGAAGTCGTGCGAG  
 GTTCAGACAGCTTTTAGCGTCTGGCTCCGAAA GCTGTCCGAAGTGGATCAAG  
 GTTCAGACAGCTTTTAGCGTCTGGCTCCGAAA GCTGTCCGAAGTGGATCAAG  
 GTTCAGACAGCTTTTAGTGTGTTGGCTCCGAAA GCTGTCCGAAGTCGTGTGAG  
 GTTCAGACAGCTTTTAGCGTCTGGCTCGAAAA GCTGTCCGAAGTCGTGTGAG  
 GTTCAGACAGCTTTTAGCGTCTGAGTTGAGAA GCTGTCCGAAGTGGATCAAG  
 GTTCAGACAGCTTTTAGCGTTTGTAGTTGAGAA GCTGTCCGAAGTAGAGCAAG  
 GTTCAGACAGCTTTTAGCGTTTGTAGTTGAGAA GCTGTCCGAAGTCGTGTGAG  
 GTTCAGACAGCTTTTAGCGTCTGAGTTGAGAA GCTGTCCGAAGTCGTGCGAG  
 GTTCAGACAGCTTTTAGCGTCTGGCTCCGAAA GCTGTCCGAAGTGGATCAAG  
 GTTCAGACAGCTTTTAGCGTCTGGCTCCGAAA GCTGTCCGAAGTGGATCAAG  
 GTTCAGACAGCTTTTAGTGTGTTAGGTGAAAA GCTGTCCGAAGTAGAGCAAGTTTCAGACAG  
 > TTCAGACAGC Con:1 reps=10 [2086406,2086936] l-int=531 l-seq = 52  
 TTCAGACAGCTTTATCTCAAAACCTGTCAAAGTTGTCCGAAGTGGAGGTAAC  
 TTCAGACAGCTTTTGGCCGAGCCCGAAGCAAAGTTGTCCAAAGACGCTGGAAG  
 TTCAGACAGCTTTTGGCTCAAAACCTGTCAAAGCTGTCCGAAGTGGTTGGAAG  
 TTCAGACAGCTTTTGGCTCAGAAGGAAGCAAA GCTGTCCGAAGAGGTTGGAAG  
 TTCAGACAGCTTTTGGCCGAGAACGAATCAAA GCTGTCCGAAGTGGAGGTAAC  
 TTCAGGACAGCTTTTGGCCGAGAACAAAACAAAGTTGTCCGAAGTGAAGGTAAC  
 TTCAGACAGCTTTTGGCCGAGAACGAATCAAA GCTGTCCGAAGGGGTTGGAAG  
 TTCAGACAGCTTTTGGCTCAGAAGAAAGCAAA GCTGTCCGAAGAGGTTGGAAG  
 TTCAGACAGCTTTTGGCCGAGAACGAATCAAA GCTGTCCGAAGTGGAGGTAAC  
 TTCAGACAGCTTTTGGCCGAGAACAAAACAAAGTTGTCCGAAGTGAAGGTAAC  
 TTCAGACAGCTTTTGGCCGAGAACAAAACAAAGTTGTCCGAAGTGAAGGTAAC  
 TTCAGACAGCTTTTGGCCGAGAACAAAACAAAGTTGTCCGAAGTGAAGGTAAC  
 > GAAAGCTGTC Con:1 reps=10 [2116675,2117153] l-int=479 l-seq = 52  
 GAAAGCTGTCCGAAGTAGGTCTGGGTTCA GACAGCTTTTAACGTCCAAGCACC  
 GAAAGCTGTCCGAATGTGGACCGGGTTCA GACAGCTTTTCCGTCTGAGCACC  
 GAAAGCTGTCCGAAGTTGGTCTAGGTTCA GACAGCTTTTCCGTCCGAGCACC  
 GAAAGCTGTCCGAAGTTGGTCTAGGTTCA GACAGCTTTTCCGTCCGAGCGCG  
 GAAAGCTGTCCGAAGTAGGTCTGGGTTCA GACAGCTTTTCCGCCGAGCACG  
 GAAAGCTGTCCGAAGTTGCCCCGGGTTCA GACAGCTTTCAACGCCGAGCGCG  
 GAAAGCTGTCCGAAGTTGCCCCGGGTTCA GACAGCTTTCAACGCCGAGCACG  
 GAAAGCTGTCCGAAGTTGCCCCGGGTTCA GACAGCTTTCAACGCCGAGCACG  
 GAAAGCTGTCCGAAGTTGCCCCGGGTTCA GACAGCTTTCAACGCCGAGCACG  
 GAAAGCTGTCCGAAGTTGCCCCGGGTTCA GACAGCTTTCAACGCCGAGCACG  
 > TCTGATTCCC Con:1 reps=23 [2149247,2150397] l-int=1151 l-seq = 52  
 TCTGATTCCCTTT CAGTAGTGTATTGGGGTAGAAGGGAATGAAAGAGCGAG  
 TCTGATTCCCTTT CAGTAGTGTATTGGGGTAGAAGGGAATGAAAGAGCGAT  
 TCTGATTCCCTTT CAATAGTGAATCGAGATAA AAAGGG AACGAAAGAGCAAG  
 TCTGATTCCCTTT CAATAGTGAATCGGGGTAG AAAGGG AACGAAAGAGCAAG  
 TCTGATTCCCTTT CAATAGTGTATCGGGTAG AAAGGG AACGAAAGAGCGAG  
 TCTGATTCCCTTT CAATAGTGTATCGGGTAG AAAGGG AACGAAAGAGCGAG  
 TCTGATTCCCTTT CAATAGTGAATCGGGGTAG AAAGGG AACGAAAGAGCAAG  
 TCTGATTCCCTTT CAATAGTGTATCGGGGTAG AAAGGG AACGAAAGAGCAAG  
 TCTGATTCCCTTT CAGTAGTGCATCGGAGGAG AAAGGG AACGAAAGAGCAAG  
 TCTGATTCCCTTT CAGTAGTGAATCGGAGGAG AAAGGG AACGAAAGAGCAAG  
 TCTGATTCCCTTT CAGTAGTGCATCGGAGGAG AAAGGG AACGAAAGAGCAAG  
 TCTGATTCCCTTT CAGTAGTGCATCGGGGTAG AAAGGG AATGAAAGAGCGAG  
 TCTGATTCCCTTT CAGTAGTGAATCGGGGTAG AAAGGG AACGAAAGAGCAAG  
 TCTGATTCCCTTT CAGTAGTGTATCGGGGTAG AAAGGG AATGAAAGAGCAAG  
 TCTGATTCCCTTT CAGTAGTGCATCGGAGGAG AAAGGG AACGAAAGAGCAAG  
 TCTGATTCCCTTT CAGTAGTGAATCGAGGTAG AAAGGG AATGAAAGAGCAAG  
 TCTGATTCCCTTT CAGTAGTGCATCGGGGTAG AAAGGG AATGAAAGAGCGAG  
 TCTGATTCCCTTT CGGTAGTGCATCGGGGAG AAAGGG AATGAAAGAGCGAG

TCTGATTCCCTTTCAGTAGTTAATTGGGGTAGAAAAGGAATGAAAGAACGAGTCTGATTCCC  
> GCTACTTCAG Con:1 reps=7 [2223040,2223414] l-int=375 l-seq = 52  
GCTACTTCAGGACAGCTTTTGCTTTAAAAACAATTAAAGTTGTCTGAACCCGAG  
GCTATTTCAGACAGCTTTTGCTTTAAAAACAATTAAAGGCTGTCCGAACCCGAA  
GCTACTTCAGGACAGCTTTTGCTTTAAAAACAATCAAAGGCTGTCCGAACCCGAA  
GCTACTTCAGGACAGCTTTTGATTAAAAACAATCAAAGGCTGTCCGAACCTGAG  
GCTACTTCAGACATCTTTTGCTTTAAAAACAATCAAAGGCTGTCCGAACCCGAA  
GCTACTTCAGGACAGCTTTTGATTAAAAACAATCAAAGGCTGTCCGAACCCGAG  
GCTACTTCAGGACAGCTTTTGCTTTAAAAACAATCAAAGGCTGTCCGAACCCGAGGCTACTTCAG  
> GCATGAGAAA Con:1 reps=5 [2268253,2268471] l-int=219 l-seq = 52  
GCATGAGAAAGGGAATCAAACAACGCTTTTCATTCCCTTTGGATAGCTTTTG  
GCATGAGAAAAGGAATGAAACAATGCTTTTCATTCCCTTTGGATAGCTTTTG  
GCATGAGAAAAGGAATGAAACAACGCTTTTTATTCCCTTTGTAGGGCTTTGG  
GCATGAGAAAGGGAATGAAACAACACTTTTCATTCCCTTTGTTGAGCTTTGTGCATGAGAAA  
> AGATTCCCTT Con:1 reps=5 [2283102,2283320] l-int=219 l-seq = 52  
AGATTCCCTTACTAGGC AAAAATGAGGTGCAAAGGGAACGAAAGGTAGTCAC  
AGATTCCCTTACTAGGC AAAAATGAGGTGCAAAGGGAACGAAAGGTAGTCAC  
AGATTCCCTTACTAGGTAAAAATGAAGCGAGAAGGGAACGAAAGGTAGTCAC  
AGATTCCCTTACTAGGC AAAAATGAAGTGCAAAGGGAACGAAAGGTAGTGTAGATTCCCTT  
> TCAGACAACC Con:1 reps=7 [2379685,2380007] l-int=323 l-seq = 52  
TCAGACAACCACCTTCCGTTCCCTTTCTCGCGCTCTTGCCATTAGAAAGGGAA  
TCAGACAACCACCTTCCGTTCCCTTTCTCGCGCTCTTGCCACTAGAAAGGGAT  
TCAGACAACCACCTTCCGTTCCCTTTCTCGCGCTCTTGTTACCAGAAAGGGAA  
TCAGACAACCACCTTCCGTTCCCTTTCTCGCGCTCTTGTTACCAGAAAGGGAA  
TCAGACAACCACCTTCCGTTCCCTTTCTCGCGCTCTTGTTACCAGAAAGGGAA  
TCAGACAACCACCTTCCGTTCCCTTTCTCGCGCTCTTGCCACTAGAAAGGGATTCAGACAACC  
> CATAGGCCTT Con:1 reps=5 [2495463,2495733] l-int=271 l-seq = 52  
CATAGGCCTTCTATGATTTAGTTGCTTGAGCGAAAACAAGGAGAAAGTGAAT  
CATAATCCTCCTATGATCCAGTTGTCTGAGCGAAAACAGGGAGAAAGTAAAT  
CATAGGCCTTCTATGATTTAGTTGCTTGAGCGAAAACAAGGAGAAAGTGAAT  
CATAGGCCTTCTATGATCCAGTTGTCTGAGCGAAAAGAAGGAGAAAGTAAAT  
CATAGGCCTTCTATGATTTAGTTGTCTGAGCGAGAACAGGTAGGAAGTAAACCATAGGCCTT  
> GGGTTGTCAG Con:1 reps=8 [2516063,2516488] l-int=426 l-seq = 52  
GGGTTGTCAGATTTTCTATCTGTATGCCAAAAGCCCAAGAAAGGGAACGAAAG  
GGGTTGTCAGATTCCCTTTCTGGCACCAAAAAGCCCGAGAAAGGGAACGAAAG  
GGGTTGTCAGATTCCCTTTCTGGCACCAAAAAGCCCGAGAAAGGGAACAAAAG  
GGGTTGTCAGATTCCCTTTCTGGCACCAAAAAGCCCGAGAAAGGGAACGAAAG  
GGGCTGTCAGATTCCCTTTCTGGCACCAAAAAGCCCGAGAAAGGGAACAAAA  
GGGTTGTCAGATTCCTTTTCTGGCACCAAAAAGCCCGAGAAAGGGAACGAAAG  
GGGTTGTCAGATTCCCTTTCTGGCACCAAAAAGCCCGAGAAAGGGAACGAAAG  
GGGTTGTCAGATTCCTTTTCTGGCACCAAAAAGCCCGAAAAAGGGAACGAAAGGGTTGTCAG  
> AAGAGGAAAA Con:1 reps=6 [2536105,2536375] l-int=271 l-seq = 52  
AAGAGGAAAAGCTGTCCGAAGTGGAGTGAGGTTTCCAGACAGGTTGGGGGTGAG  
AAGAGGAAAAGCTGTCCGAAGTGGAGTAAAGTTTCCAGACAGGTTGAGGGTGAG  
AAGAGGAAAAGCTGTCCGAAGTGGAGTGAGGTTTCCAGACAGGTTGGGGGTGAG  
AAGAGGAAAAGCTGTCCGAAGTGGAGTGAGGTTTCCAGACAGGTTGAGGGTGAG  
AAGAGGAAAAGCTGTCCGAAGTGGAGTGAGGTTTCCAGACAGGTTGAGGGTGTAAGAGGAAAA  
> CCAAGAAAGG Con:1 reps=7 [2696032,2696348] l-int=317 l-seq = 52  
CCAAGAAAGGGAATCAAAGGTGTTGTCTGATTCCCTTACTGTTGCCAAAAG  
CCAAGAAAGGGAATCAAAGCTGTTGTCTGATTCCCTTACTGTTGCCAAAAGC  
CCAAGAAAGGGAATCAAAGGCGTTGTCTGATTCCCTTATTGTTGTCAAAGC  
CCAAGAAAGGGAATCAAAGGCGTTGTCTGATTCCCTTATTGTTGTCAAAGC  
CCAAGAAAGGGAATCAAAGGCGTGATTCCCTTACTGTTGTCAAAGC  
CCAAGAAAGGGAATCAAAGGCGTTGTCTGATTCCCTTACTGTTGTCAAAGCCCAAGAAAGG  
> AAGGAGGAAG Con:1 reps=7 [2741337,2741711] l-int=375 l-seq = 52  
AAGGAGGAAGTGAATCATACGCCTTCTATGATTTCAAGTTGCCGAGGCGAAACC  
AAGGAGGAAGTGAATCATACACACTCTATGATCCAGTTGCCAAGGCGAAGCC  
AAGGAGGAAGTGAATCATACACACTCTATGATCCAGTTGCCAAGGCGAAAAAT  
AAGGAGGAAGTGAATCATACGCCTTCTATGATCCAGTTGCCGAGGCGAAACC  
AAGGAGGAAGTGAATCATACGCCTTCTACGATCCAGTTGGCAAGGCGAAAAAT  
AAGGAGGAAGTGAATTCATAGCCCCCTCTATGATACAGTTGCCGAGGCGAAGCC  
AAGGAGGAATAAATCATAGCCCCCTCTATGATCCAGTTGCCGAGGCGAAACCAAGGAGGAAG  
> CAAAGGGAAT Con:1 reps=12 [2767735,2768316] l-int=582 l-seq = 52  
CAAAGGGAATGAAAAGCGTTGTTTGATTCCCTTTCTCATGCCAAAAGCTCAA  
CAAAGGGAATGAAAAGCGTTGTTTGATTCCCTTTCTCATCCAAAAGCTCAA



CAAAGGGAATGAAAAGCGTTGTTTGATTCCCTTTCTCAGGCCAAAAGCTCAA  
CAAAGGGAATGAAAAGCGTTGTTTCATTCCCTTTCTCAGGCCAAAAGCCATC  
CAAAGGGAATGAAAAGCATTGTTTGATTCCCTTTCTCAGGCCAAAAGCTCAA  
CAAAGGGAATGAAAAGCGTTGTTTCATTCCCTTTCTCAGGCCAAAAGCCATC  
CAAAGGGAATGAAAAGCATTGTTTGATTCCCTTTCTCAGGCCAAAAGCTCAA  
CAAAGGGAATGAAAAGCGTTGTTTGATTCCCTTTCTCATGCCAAAAGCCATC  
CAAAGGGAATGAAAAGCATTGTTTGATTCCCTTTCTCAGGCCAAAAGCCATC  
CAAAGGGAATGAAAAGCGTTGTTTCATTCCCTTTCTCATGCCAAAAGCCATC  
CAAAGGGAATGAAAAGCATTGTTTGATTCCCTTTCTCATGCCAAAAGCCATCCAAAGGGAAT  
> AAAGGGAATG Con:1 reps=7 [2792762,2793084] l-int=323 l-seq = 52  
AAAGGGAATGAAAAGAGTTGTTTGATTCCCTTTCTCATGCCCAGAGCCCAAC  
AAAGGGAATGAAAAGCGTTGTTTCATCCCCTTTCTCATGACCAAAGCCCAAC  
AAAGGGAATGAAAAGAGTTGTTTGATTCCCTTTCTCATGCCCGAAGCCCAAC  
AAAGGGAATGAAAAGAGTTGTTTGATTCCCTTTCTCATGCCCAAAGCCCAAC  
AAAGGGAATGAAAAGCATTGTTTGATTCCCTTTCTCATGCCCAAAGCCCAAC  
AAAGGGAATGAAAAGCATTGTTTGATTCCCTTTCTCATGCCCAGAGCCTATGAAAAGGGAATG  
> AATCATAGGC Con:1 reps=4 [2999947,3000113] l-int=167 l-seq = 52  
AATCATAGGCTCTCTATGATTTAGTTGACAAGGCGAAAGCAAGGAGGAAGTG  
AATCATAGGCTCTCTATGATTTAGTTGCCAAGGCAAAAACAAGGAAGAAGTG  
AATCATAGGCCTTCTATGATTTAGTTGCCAAGGCGAAAGCAAGGAGGAAGTAATCATAGGC  
> TTTTCATTCCC Con:1 reps=7 [3095308,3095632] l-int=325 l-seq = 52  
TTTCATTCCCTTTCTATAGGCTTTGTGTATGAGAAAGGGAATCAAACAACGCT  
TTTCATTCCCTTTGGATGGCTTTTGGCATAAGAAAGGGAATCAAACAACGCT  
TTTCATTCCCTTTGGATGGCTTTTGGCATGAGAAAGGGAATCAAACAATGCT  
TTTCATTCCCTTTGGATGGCTTTTGGCATGAGAAAGGGAATCAAACAATGCT  
TTTCATTCCCTTTGGATGGCTTTTGGCATGAGAAAGGGAATCAAACAATGCT  
TTTCATTCCCTTTGATAGCTTTGTGCATGAGAAAGGGAATCAAACAACGCGCTTTTCATTCCC  
> TGTCTGATTC Con:1 reps=6 [3491116,3491382] l-int=267 l-seq = 52  
TGTCTGATTCCTTTACTAATAACAAAAGCCCAACAAAGGGAATTAAGAGGT  
TGTCTGATTCCCTTTTTGATGCCAGAAGCCCAACAAAGGGAATCAAAGCGGT  
TGTCTGATTCCCTTTCTGATGCCAAGTGCCCTAGAAAGGGAACCAAAGGGGC  
TGTCTGATTCCCTTTCTGATGCCAAGTGCCCTAGGAAGGGAACAAAAGGC  
TGTCTGATTCCCTTTCTGATGCCAGAGCCCAAAAGAGAATCAAAGCGTTGTCTGATTC  
> ATCAAACAAC Con:1 reps=7 [3630624,3630945] l-int=322 l-seq = 52  
ATCAAACAACCTCTTTTCATTCCCTTTGCTGGTCTTATGGCATGAGAAAGGGA  
ATCAAACAACCTCTTTTCATTCCCTTTGTTGGGCTTATGGCATGAGAAAGGG  
ATCAAACAACCTCTTTTCATTCCCTTTGTTGGGCTTATGGCATGAGAAAGGGA  
ATCAAACAACCTCTTTTCATTCCCTTTGTTGGGCTTATGGCATGAGAAAGGGA  
ATCAAACAACCTCTTTTCATTCCCTTTGTTGGGCTTATGGCATGGGAAAGGGA  
ATCAAACAACCTCTTTTCATTCCCTTTGTTGGGCTTATGGCATGGGAAAGGGAATCAAACAAC  
> TTTCTCCTTG Con:1 reps=6 [3790499,3790820] l-int=322 l-seq = 52  
TTTCTCCTTGTTTTTCGCGACGGGAACATAATTATAGAAGCTTATGATTTAC  
TTTCTCCTTGTTTTTGCCTCAGCAACTGAATCATAGAGAGCCTATGATTTAC  
TTTCTCCTTGTTTTTGCAGCGGAACATAATCATAGAGAGCCTATGATTTAC  
TTTCTCCTTGTTTTTCCCCCGCCAACATAATCATAGAGAGCCTTTGATTTAC  
TTTCTCCTTGTTTTTGCCTCATCAACTGAATCATAGAGAGCCTTTGATTTAC  
TTTCTCCTTGTTTTTCTCAGCAACTGAATCATAGAGAGCCTATGATTCACTTTCTCCTTG  
> GAAAGGCTGTC Con:1 reps=10 [3845277,3845755] l-int=479 l-seq = 52  
GAAAGGCTGTCCGAACTTCACTTGGGTTCTGACTACTTTTCCTTTACGACCAC  
GAAAGGCTGTCCGAACTTCACTTGGGTTCTGGACTACTTTCCCTTTACGACCAC  
GAAAGGCTGTCCGAACTTCACTTGGGTTCTGGACTACTTTCCCTTTACGACCAC  
GAAAGGCTGTCCGAACTTCACTTGGGTTCTGGACTACTTTTCCTTTTGACCGC  
GAAAGGCTGTCCGAACTTCACTTGGGTTCTGGACTACTTTTCCTTTACGACCAC  
GAAAGGCTGTCCGAACTTCACTTGGGTTCTGGACTACTTTCCCTTTACGACCAC  
GAAAGGCTGTCCGAACTTCACTTGGGTTCTGGACTACTTTTCCTTTACGACCAT  
GAAAGGCTGTCCAAACCTTCACTTGGGTTCTGGACTACTTTTCCTTTACGACCAC  
GAAAGGCTGTCCGAACTTCACTTGGGTTCTGGACTACTTTCCCTTTACGACCACGAAAGGCTGTC  
> AAAGGGAATG Con:1 reps=4 [3876626,3876792] l-int=167 l-seq = 52  
AAAGGGAATGAAAAGAGTTGTTTGATTCCCTTTCTCATGCCCAAAGCCCAAC  
AAAGGGAATGAAAAGCGTTGTTTCATCCCCTTTCTCATGACCAAAGCCCAAC  
AAAGGGAATGAAAAGAGTTGTTTGATTCCCTTTCTCATGCCCAGAGCCTATGAAAAGGGAATG  
> TTGGCATGAG Con:1 reps=5 [3924084,3924302] l-int=219 l-seq = 52  
TTGGCATGAGAAAGGGTATGAAACAACGCTTTTCATTTCTTCTTGAGCTC  
TTGGCATGAGAAAGGGAATGAAACAATGCTTTTATTCCCTTTGTTGAGCTT  
TTGGCATGAGAAAGGGAATGAAACAACGCTTTTCATTCGTTTGTGAGCTT

TTGGCATGAGAAAGGGAATGAAACAATGCTTTTTATTCCCTTTGTTGAGCTTTTGGCATGAG  
> GCCTATGATT Con:1 reps=8 [3938951,3939325] l-int=375 l-seq = 52  
GCCTATGATTTAGTTCTCTCTTGTCTCGCTTCGGCAACTGACTCATAGAAG  
GCCTATGATTCACCTCCTCCTTGTTCGCTTCAGCAACTGACTCATAGAAG  
GCCTATGATTCACCTCCTCCTTGTTCGCTTCAGCAACTGAAATCATAGAAG  
GCCTATGATTCACCTCCTCCTTGTCTTCGCTTCGGCAACTGACTCATAGAAG  
GCCTATGATTTAGTTCTCTCTTGTTCGCTTCGGCAACTGAAATCATAGAAG  
GCCTATGATTCACCTCCTCCTTGTCTTCGCTTCGGCAACTGACTCATAGAAG  
GCCTATGATTTAGTTCTCTCTTGTTCGCTTCAGCAACTGAATCATTAAAGAGCCTATGATT  
> ACTTCGGACA Con:1 reps=20 [3948839,3949836] l-int=998 l-seq = 52  
ACTTCGGACAGCTTTTACCCAGTTTTAGTGCAAAAGCTGTCTGAACTCTGGCCT  
ACTTCGGACAGCTTTTACCCAGTTTTAAAGCAAAGCTGTTTGAACCTCTGGCAA  
ACTTCGGACAGCTTTAGCTTGTTTAGAGCAAAAGCTGTCTGAACTCATACCT  
ACTTCGGACAGCTTTTACCTATTTTTAGAGCAAAAGCTGTCTGAACTCTGGCAA  
ACTTCGGACAGCTTTAGCTTGTTTAGAGCAAAAGCTGTCTGAACTCTGGCCT  
ACTTCGGACAGCTTTAGCTTGTTTAGAGCAAAAGCTGTCTGCGCTCTTGCCA  
ACTTCGGACAGCTTTAGCGTGTTTAGAGCAAGCTGTCTGGAACCTCTGGCCT  
ACTTCGGACAACCTTTAGCTTGTTTAGAGCAAGCTGTCTGAACTCTAGCCT  
ACTTCGGACAACCTTTAGCTTGTTTAGAGCAAGCTGTCTGGAACCTCTGGCCT  
ACTTCGGACAACCTTTAGCTTGTTTAGAGCAAGCTGTCTGGAACCTCTAGCCT  
ACTTCGGACAACCTTTAGCTTGTTTAGAGCAAGCTGTCTGGAACCTCTAGCCT  
ACTTCGGACAACCTTTAGCTTGTTTAGAGCAAGCTGTCTGGAACCTCTAGCCT  
ACTTCGGACAACCTTTAGCTTGTTTAGAGCAAGCTGTCTGGAACCTCTAGCCT  
ACTTCGGACAACCTTTAGCTTGTTTAGAGCAAAAGCTGTCTGAACTCTGGCCT  
ACTTCGGACAGCTTTTACCTATTTTTAGAGCAAAAGCTGTCTGAACTCTGGCAA  
ACTTCGGACAACCTTTACCTAGTTTTAAAGCAAAGCTGTCTGAACTCTGGCCT  
ACTTCGGACAGCTTTTACCTAGTTTTAGAGCAAAAGCTGTCTGAACTCACACCTACTTCGGACA  
> GGAATGAAAA Con:1 reps=8 [3983763,3984137] l-int=375 l-seq = 52  
GGAATGAAAAGAGTTGTTTCATTCCCTTTCTCATGCCCAAAGCCCAACAAAG  
GGAATGAAAAGAGTTGTTTCATTCCCTTTCTCATGCCCAAAGCCCAACAAAG  
GGAATGAAAAGCGTTGGTTCGTTCCCTTTCTCATGCCCAAAGCCCAACAAAG  
GGAATGAAAAGCATTGTTTCGTTCCCTTTCTCATGCCCAAAGCTCAACAAAG  
GGAATGAAAAGAGTTGTTTCATTCCCTTTCTCATGCCCAAAGCCCAACAAAG  
GGAATGAAAAGCAGTGTTCATTCCCTTTCTCATGCCGAAAGCCCAACAAAG  
GGAATGAAAAGCATTGTTTGATTCCCTTTCTCATGCCCAAAGCCCAACAAAGGAATGAAAA  
> TTTCTCATGC Con:1 reps=6 [4004918,4005188] l-int=271 l-seq = 52  
TTTCTCATGCACAAAGCTCAACAAGGGAATGAAAAGCATTGTTTCATTCTCT  
TTTCTCATGCCCAAAGCTATCCAAAGGTAATGAAAAGCATTGTTTCATTCTCT  
TTTCTCATGCCCAAAGCTATCCAAAGGGAATGAAAAGCGTTGTTTGATTCCC  
TTTCTCATGCCCAAAGCTATCCAAAGGGAATGAAAAGCATTGTTTCATTCTCT  
TTTCTCATGCCCAAAGCTATCCAAAGGGAATGAAAAGCGTTGTTTGATTCCCTTCATGC  
> TTTCAATCCC Con:1 reps=8 [4016265,4016639] l-int=375 l-seq = 52  
TTTCAATTCCCTTTCATAGGCTTTGTGCATGAGAAAGGGAATCAAACAACGCT  
TTTCAATTCCCTTTGGATGGCTTTTGGCATGAGAAAGGGAATCAAACAATGCT  
TTTCAATTCCCTTTGTTGAGCTTTTGGCATAAGAAAGGGAATCAAACAATGCT  
TTTCAATTCCCTTTGGATGGCTTTTGCATGAGAAAGGGAATGAAACAATGCT  
TTTCAATTCCCTTTGGATGGCTTTTGGCATGAGAAAGGGAATCAAACAATGCT  
TTTCAATTCCCTTTGGATGGCTTTTGCATGAGAAAGGGAATGAAACAATGCT  
TTTCAATTCCCTTTGGATGGCTTTTGGCATGAGAAAGGGAATCAAACAACGCGCTTTTCATTCCC  
> ACTTCGGACA Con:1 reps=25 [4106739,4108001] l-int=1263 l-seq = 52  
ACTTCGGACAACCTTCGAGAGGCACGAAGCAAAAGCTGTCTCGAACCTTGAGTG  
ACTTCGGACAACCTTCAGTGTCGGAAAGCAAAAGCTGTCTCGAACCTTGAGTG  
ACTTCGGACAACCTTCAGTGTCGGAAAGCAAAAGCTGTCTCGAACCTTGAGTG  
ACTTCGGACAACCTTCGAGTGCCCGGAAGCAAAAGCTGTCTCGAACCTTGAGCG  
ACTTCGGACAACCTTCGAATGCCCGGAAGCTAAAGCTGTCTCGAACCTTGAGCA  
ACTTCGGACAACCTTCGAATACCCGGAAGCTAAAGCTGTCTCGAACCTTGAGCA  
ACTTCGGACAACCTTCGAGTGCCCGGAAGCTAAAGCTGTCTCGAACCTTGAGCG  
ACTTCGGACAACCTTCGAATGCCCGGAAGCAAAAGCTGTCTCGAACCTTGAGCA  
ACTTCGGACAACCTTCGAATGCCCGGAAGCTAAAGCTGTCTCGAACCTTGAGCG  
ACTTCGGACAACCTTCGAATGCCCGGAAGCTAAAGCTGTCTCGAACCTTGAGCG  
ACTTCGGACAACCTTCGAATGCCCGGAAGCTAAAGCTGTCTCGAACCTTGAGCG  
ACTTCGGACAACCTTCGAGTGCCCGGAAGCTAAAGCTGTCTCGAACCTTGAGCA

[illegible]

CTCTCTTCGGACAGCTTTGGCTCTTTTCTAGACATAAAGCTGTCTGAACCTGGA  
CTCTCTTCGGACAGCTTTAGCTCTTTTGGCTTCAAAGGCTGTCTGAACCCAGA  
CTCTCTTCGACAACTTTTGGCTCTTTTCTAGCCTTAAAGGCTGTCTGAACCTGGA  
CTCTCTTCGGACAGCTTTAGCTCTTTTGGCTTCAAAGGCTGTCTGAACCTGGA  
CTCTCTTCGACAACTTTTGGCTCTTTTCTAGACATAAAGCTGTCTGAACCTGGA  
CTCTCTTCGACAACTTTTGGCTCTTTTCTAGACATAAAGCTGTCTGAACCTAGG  
CTCTCTTCGACAACTTTTGGCTCTTTTCTAGCCTTAAAGGCTGTCTGAACCTGGACTCTCTTCGG  
> AGTTCGGACA Con:1 reps=13 [4385482,4386323] l-int=842 l-seq = 52  
AGTTCGGACAGCTTTTTGGCACTTGGTAGCTTAAAGGCTGTCTAAAGTTACTCCG  
AGTTCGGACAACTTTTCACTCCCTGACTCTCAAAGGCTGTCCGAGGTTGCTCCG  
AGTTCGGACAGCTTTCACTCTCTGACTCTCGAAGTTGTCCGAAGTTACTCCA  
AGTTCGGACAACTTTTCACTCCTTTGGCCCTCAAAGGCTGTCCGAAGTTGCTCCG  
AGTTCGGACAACTTTTGGCACTTGGCTACTAAAGGCTGTCTGAACTTGGCTAA  
GGTTCGGATAGCTTTTCTCCTTGGACCTCGAAGTTGTCCGAAGTTACTCCA  
AGTTCGGACAGCTTTACTCTCTGACTCTCGAAGTTGTCCGAAGTTACTCCA  
AGTTCGGACAGCTTTCACTCTCTGACTCTCGAAGTTGTCCGAAGTTACTCCA  
AGTTCGGACAACTTTTCACTCCTTGGCCCTCAAAGGCTGTCCGAAGTTGCTCCG  
AGTTCGGACAACTTTTGGCACTTGGCTACTAAAGGCTGTCTGAACTTGGCTAA  
GGTTCGGACAGCTTTTTGTCTCCTTGGCCCTCAAAGTTGTCCGAAGTTACTCCG  
AGTTCAGGACAGCTTTACTCTCTGACTCTCGAAGTTGTCCGAAGTTACTCCA  
AGTTCGGACAACTTTTCACTCCTTGGCCCTCAAAGGCTGTCCGAAGTTGCTCCG  
AGTTCGGACAACTTTTGGCACTTGGCTACTAAAGGCTGTCTGAACTTGGCTAA  
GGTTCGGACAGCTTTTTCTCCTTGGACCTCGAAGTTGTCCAATGTTACTCCA  
AGTTCGGACAACTTTTGTCTCCTTGGCCCTCAAAGGCTGTCCGAAGTTGCTCCAAGTTCCGACA  
> ACTTCGGACA Con:1 reps=13 [4426732,4427366] l-int=635 l-seq = 52  
ACTTCGGACAAGTTTCGATCCTCTTAGACTAAAAGCTGTCCGAACCCGAGCA  
ACTTCGGACAACTTCAATCCTCTGAGACCAAAAGCTGTCCGAACCCGAGCA  
ACTTCGGACAACTTCAATCCTCTGAGACCAAAAGCTGTCCGAACCCAGCAGC  
ACTTCGGACAACTTCGATTCTCTGTGACCAAAAGCTGTCCGAACCCAGCAGC  
ACTTCGGACAACTTCGATCCTCTGAGACCAAAAGCTGTCCGAACCCAGCAGC  
ACTTCGGACAACTTCGATCCTCTTAGACTAAAAGCTGTCCGAACCCTGAACA  
ACTTCGGACAGGTTTCGACCTCTGTGACCTAAAGTTGTCCGAACCCGAGCA  
ACTTCGGACAGCTTTCAATCTTCTGAGACCAAAAGCTGTCCGAACCCTGAACA  
ACTTCGGACAGGTTTCGACCTCTGTGACCTAAAGTTGTCCGAACCCGAGCA  
ACTTCGGACAGCTTTCAATCTTCTGAGACCAAAAGCTGTCCGAACCCTGAACA  
ACTTCGGACAGGTTTCGACCTCTGTGACCTAAAGTTGTCCGAACCCGAGCA  
ACTTCGGACAGCTTTCAATCTTCTGAGACCAAAAGCTGTCCGAACCCTGAACA  
ACTTCGGACAGGTTTCGATCCTCTTAGACCAAAAGCTGTCCGAACCCGACAGC  
ACTTCGGACAGGTTTCGATCCTCTTAGACCAAAAGCTGTCCGAACCCGACAGC  
ACTTCGGACAGGTTTCGATCCTCTTAGACCAAAAGCTGTCCGAACCCGACAGC  
> TACTTCAGAC Con:1 reps=27 [4437435,4438792] l-int=1358 l-seq = 52  
TACTTCAGACAACCTTGGCCTTGTAAGCACGAAAGCTGTCCGAACACAGAGC  
TACTTCAGACAACCTTTGCTTTGCTATCCAAAACTGTCCGAACACAGAGC  
TACTTCAGACAACCTTTTCTTGTAAAGCACGAAAGCTGTCCGAACACAGAGA  
TACTTCAGACAACCTTGGCCTTGTAAGCACGAAAGCTGTCCGAACACAGAGA  
TACTTCAGACAACCTTTGCTTTGCTATCCAAAAAGTTGTCCGAACACAGAGA  
TACTTCAGACAACCTTGGCCTTGTAATTCCTAAAGTTGTCCGAACACAGGC  
TACTTCAGACAACCTTTTCTTGTAAAGCACGAAAGCTGTCCGAACACTAGGC  
TACTTCAGACAACCTTGGCCTTGTAATTCCTAAAGTTGTCCGAACACCCGGC  
TACTTCAGACAACCTTTTCTTGTAAAGCACAAAAGCTGTCCGAACACAGGC  
TACTTCAGACAACCTTTTCTTGTAAAGCACGAAAGCTGTCCGAACACTAGGC  
TACTTCAGACAACCTTGGCCTTGTAAGCACGAAAGCTGTCCGAACACAGAGC  
TACTTCAGACAACCTTTGCTTTGCTATCCAAAACTGTCCGAACACAGAGC  
TACTTCAGACAACCTTTTCTTGTAAAGCACGAAAGCTGTCCGAACACTAGGC  
TACTTCAGACAACCTTGGCCTTGTAATTCCTAAAGTTGTCCGAACACTGGGC  
TACTTCAGACAACCTTGGCCTTGTAATTCCTGAAAGTTGTCCGAACACTGGGC  
TACTTCAGACAACCTTGGCCTTGTAAGCACGAAAGCTGTCCGAACACAGAGC  
TACTTCAGACAACCTTTGCTTTGCTATCCAAAAGCTGTCCGAACACAGAGA  
TACTTCAGACAACCTTTTCTTGTAAAGCACGAAAGCTGTCCGTACACAGGC  
TACTTCAGACAACCTTGGCCTTGTAATTCCTAAAGTTGTCCGAACACAGGC  
TACTTCAGACAACCTTTTCTTGTAAAGCACGAAAGCTGTCCGAACACTAGGC  
TACTTCAGACAACCTTGGCCTTGTAATTCCTGAAAGTTGTCCACTGGGC  
TACTTCAGACAACCTTGGCCTTGTAAGCACGAAACTGTCCGAACACAGAGC  
TACTTCAGACAACCTTTGCTTTGCTATCCAAAAGCTGTCCGAACACAGAGC  
TACTTCAGACAACCTTTTCTTGTAGAGCACGAAACTGTCCGAACACAGAGC  
TACTTCAGACAACCTTTGCTTTGCTATCCAAAAGCTGTCCGAACACAGAGC  
TACTTCAGACAACCTTTTCTTGTAAAGCACGAAAATGTCCGAACACAGAGATACTTCAGAC  
> GTTCAGACAG Con:1 reps=13 [4452843,4453477] l-int=635 l-seq = 52

GTTTCAGACAGCTTTTGCTCTCTAGGACCTGAACCTGTCCAACCTTGACTCGT  
GTTTCAGACAGCTTTTGCTTCTCTCGCTCATGAACCTGTCCGAACCTTGACTCGG  
GTTTCAGACAGCTTTTGCCTCCTAGGACCTGAACCTGTCCAAACCTTGACTCGG  
GTTTCAGACAGCTTTTGCCTCCTGGCCCCCGAAGCTGTCCGAACCTTAGCTCAG  
GTTTCAGACAGCTTTTGCTTTCTGGCCACCGAAGCTGTCCGAACCTTAGCTCGG  
GTTTCAGACAGCTTTTGCCTCCTGGCCCCCGAAGCTGTCCGAACCTTAGCTCGG  
GTTTCAGACAGCTTTTGCCTCCTAGCCACCGATCCTGTCCGAACCTTGACTCGG  
GTTTCAGACAGCTTTTGCCTCCTGGCCACCGAAGCTGTCCGAACCTTAGCTCGA  
GTTTCAGACAGCTTTTGCCTCCTAGGACCTGAACCTGTCCAACCTTGACTCGG  
GTTTCAGACAGCTTTTGCTTTCTGGCCACCGATCCTGTCCGAACCTTGACTCGG  
GTTTCAGACAGCTTTTGCCCCTAGCCACTGAACCTGTCCGAACCTTGACTCGG  
GTTTCAGACAGCTTTTGCCTCCTAGCCACCGTACCTGTCCGAACCTTGACTCGGGTTCAGACAG  
> AATGCTTTTC Con:1 reps=8 [4471530,4471903] l-int=374 l-seq = 52  
AATGCTTTTCATTCCCTTTGTTGGGCTTTGGGCATGTGAAAGGGAATGAAAC  
AATGCTTTTCATTCCCTTTGTTGGGCTTTGGGCATGTGAAAGGGAATCAAAC  
AATGCTTTTCATTCCCTTTGTTGGGCTTTGGGCATGTGAAAGGGAATGAAAC  
AATGCTTTTCATTCTTTTGTGGGCTTTGGGCATGTGAAAGGGAATCAAAC  
AATGCTTTTCATTCCCTTTGTTAGGCTTTGGGCATGTGAAAGGGAATGAAAC  
AATGCTTTTCATTCTTTTGTGGGCTTTGGGCATGAGTAAGGGAATCAAAC  
AATGCTTTTCATTCTTTTGTGGGCTTTGGGCATGTGAAAGGGAATCAAACAATGCTTTTC  
> GTTCGGACAG Con:1 reps=23 [4520185,4521337] l-int=1153 l-seq = 52  
GTTTCGGACAGCTATGGGACCAAAAGATCAAAACCTGTCTGAAGTCAGATCAG  
GTTTCGGACAGCTATGGGACCAAAAGATCAAAACCTGTCTGAAGTCAGAGCAG  
GTTTCGGACAGCTATGGGACCAAAAGATCAAAAGCTGTCTGAAGTCGGAGCAG  
GTTTCGGACAGCTTGGACCCCAAAAGATCAAAAGCTGTCCGAAGTCAAGGTAA  
GTTTCGGACAGCTTGGACCCCAAAAGTTCAAAAGCTGTCCGAAGTCAAGGTAA  
GTTTCGGACAGCTTGGACCCCAATAAATCAAAAGCTGTCCGAAGTCAAGGTAA  
GTTTCGGACAGCTTGGACCCCAATAAATCAAAAGCTGTCCGAAGTCAAGGTAA  
GTTTCGGACAGCTTGGACCCCAATAAATCAAAAGCTGTCCGAAGTCAAGGTAA  
GTTTCGGACAGCTTAGGGACCAATAGATCAAAAGCTGTCTGAAGTCGGAGCAG  
GTTTCGGACAGCTTGGACCCCAATAAATCAAAAGCTGTCCGAAGTCAAGGTAA  
GTTTCGGACAGCTTAGGGACCAATAGATCAAAAACCTGTCTGAAGTCGGAGCAA  
GTTTCGGACAGCTATGGGACCAAAAGATCAAAAGCTGTCCGAAGTCGGAGCAG  
GTTTCGGACAGCTTGGACCCCAATAAATCAAAAGCTGTCCGAAGTCGGAGCAA  
GTTTCGGACAGCTATGGGACCAAAAGATCAAAAACCTGTCTGAAGTCAGATCAG  
GTTTCGGACAGCTATGGGACCAAAAGATCAAAAGCTGTCCGAAGTTGGAGCAG  
GTTTCGGACAGCTTGGACCCCAAAAGATCAAAAGCTGTCCGAAGTCAAGGTAA  
GTTTCGGACAGCTTGGACCCCTATAAATCAAAAGCTGTCCGAAGTCAAGGTAA  
GTTTCGGACAGCTCGGACCCCAATAAATCAAAAGCTGTCCGAAGTCAAGGTAA  
GTTTCGGACAGCTTAGGGACCAATAGATCAAAAGCTGTCTGAAGTCGGAGCAG  
GTTTCGGACAGCTTGGACCCCAATAGATCAAAAGCTGTCTGAAGTCGGAGCAG  
GTTTCGGACAGCTTGGACCCCAATAAATCAAAAGCTGTCCGAAGTCAAGGTAA  
GTTTCGGACAGCTTAGGGACCAATAGATCAAAAGCTGTCCGAAGTCGGAGCAAGTTCGGACAG  
> CAGGCAACTT Con:1 reps=4 [4542766,4542983] l-int=218 l-seq = 52  
CAGGCAACTTGATTATAGAAAGCCTATGATTCACTTACACCATATTTTCGCT  
CAGGCAACTTGATCATAGAAGGTCTATGATTTACTTCTCCTCGTTTTTCGT  
CAGGCAACTGAATCATAGAAGGCCATGGTTTACTTTCTCCTCGTTTTTCGT  
CAGGCAACTTGATCATAGAAGGCCATGGTTTACTTGTCTCCTCGTTTTTCGTCCAGGCAACTT  
> ATTCCCTTTG Con:1 reps=10 [4572662,4573194] l-int=533 l-seq = 52  
ATTCCCTTTGTCGGAGAAATTACACAGGAAAGGGAACGAAAGGAGCGCTTTG  
ATTCCCTTTGTCGGAGAAAATACACAGGAAAGGGAACGAAAGGAGCGCTTTG  
ATTCCCTTTGTCGGAGGAAATACACAGGAAAGGGAACGAAAGGAGTGCCTTTG  
ATTCCCTTTGTCGGAGGAAATACACAGGAAAGGGAACGAAAGGAGCGCTTTG  
ATTCCCTTTGTTGGAGAAAATACACAGGAAAGGGAACGAAAGGAGTGCCTTTCA  
ATTCCCTTAGTCGGAGAAAATACACAGGAAAGGGAACGAAAGGAACGCTTTG  
ATTCCCTTTGTCGGAGAAAATACACTGGAAGGTAACGAAAGATGTGCTTTG  
ATTCCCTTTGTCGGAGAAAATACACTGGAAAGGGCACGAAAGGAGCGCTTTCA  
ATTCCCTTTGTCGGAGAAAATACACAGGAAAGGGAACGAAAGGAGCGCTTTG  
ATTCCCTTTGTCGGAGAAAATACACTGGAAAGGGAACGAAAGGAGCGCTTTGATTCCCTTTG  
> TGAACCTGTCTGAACCTTACCTTCACTTCAGACAGCTTTTGGCTTCTGGCACA  
TGAACCTGTCTCGAACTTGCCTTCACTTTGGACAGCTTTTCGGCTCCTGGCGCT  
TGAACCTGTCCGAACCTTGTCTCCACTTCGGACAGCTTTTCGGCTTCTGGCGCT  
TGAACCTGTCCGAAGTTGAGCACTCTTCGGACAACCTTTCGGCTTCTAACGCA  
TGAACCTGTCTCAAGTTGCGCACTCTTCGGACAGCTTTTCGGCTCCTGGCGCA

[illegible]



AAGTGAATCATCATCAAGTCTTCTCTATGATCCAGATTGCCTGAGTGAAGAAACAAGAGA  
AGGTGAATCATTGGCTCTTTATGATCCAGTTGCCTGAGCGGAAACAAGGAGA  
AAGTGAATCATTGGCTCTCTATGATTTTCAGTTGCTAAAGCGGAAACAAGGAGA  
AAGTGAATCATTGGCTCTCTATGATTTTCAGTTGCTAAAGCGGAAACAAGGAGAAAGTGAATCA  
> AAAAGCTGTCT Con:1 reps=15 [5152559,5153297] l-int=739 l-seq = 52  
AAAAGCTGTCTGAACTTGAGCCTACTTCGGACAACCTTAGGAGCCATGCGGC  
AAAAGCTGTCTGAACTTGAGCCTACTTCGGACAGCTTTAGGAGCCATGCGGC  
AAAAGCTGTCTGAACTTGAGCCTACTTCGGACAGCTTTAGGAGCCATGCGGC  
AAAAGCTGTCTGAACTTGAGCCTACTTCGGACAGCTTTAGGAGCCATGAGGT  
AAAAGCTGTCTGAACTTGAGCCTACTTCGGACAGCTTTAGGAGCCATGAGGT  
AAAAGCTGTCTGAACTTGAGCCTACTTCGGACAGCTTTAGGAGCCATGCGGC  
AAAAGCTGTCTGAACTTGAGCCTACTTCGGACAGCTTTAGGAGCCATGCGGC  
AAAAGCTGTCTGAACTTGAGCCTACTTCGGACAGCTTTAGGAGCCATGCGGT  
AAAAGCTGTCTGAACTTGAGCCTACTTCGGACAGCTTTAGGAGCCATGAGGT  
AAAAGCTGTCTGAACTTGAGCCTACTTCGGACAACCTTAGGAGCCATGCGGC  
AAAAGCTGTCTGAACTTGAGCCTACTTCGGACAGCTTTAGGAGCCATGAGGT  
AAAAGCTGTCTGAACTTGAGCCTACTTCGGACAACCTTAGGAGCCATGCGGC  
AAAAGCTGTCTGAACTTGAGCCTACTTCGGACAGCTTTAGGAGCCATGAGGT  
AAAAGCTGTCTGAACTTGAGCCTACTTCGGACAGCTTTGGAGAGACAAACGACAAAAGCTGTCT  
> CTGTTTCAGAC Con:1 reps=10 [5249431,5249908] l-int=478 l-seq = 52  
CTGTTTCAGACATCTTGCCCTCTTTTCCGACTGAAGTTGTCCGAAGTTGCGCT  
CTGTTTCAGACAGCTTCTCTCTTTTCTAGCTAAATCTGTCCGAAGTTGCGCT  
CTGTTTCAGACATCTTGCCCTCTTTTCCGACTGAAGTTGTCCGAAGTTGCGCT  
CTGTTTCAGACAGCTTTCTCTCTTTTCTAGCTAAGGCTGTCCGAAGATAGGCT  
CTGTTTCAGACAGCTTTCTCTCTTTTCTAACTAAAGCTGTCTGAAGATCGGCC  
CTGTTTCAGACAGCTTTCTCTCTTTTCTAGCTAAAGCTGTCCGAAGATAGGCT  
CTGTTTCAGACAGCTTCTCTCTTTTCTAGCTAAATCTGTCCGAAGTTGCGTT  
CTGTTTCAGACAGCTTCTCTCTTTTCTAGCTAAGGCTGTCCGAAGTTGCGTT  
CTGTTTCAGACAGCTTCTCTCTTTTCTAGCTAAGGCTGTCCGAAGTTGCGTTCTGTTTCAGAC  
> ACTTCGGACA Con:1 reps=10 [5267087,5267720] l-int=634 l-seq = 52  
ACTTCGGAGTCTTCAAGCTCCAGACAGGGAAAAGCTGTCTCGAACACAAGCCG  
ACTTCGGACAGCTTTAGGACTCAGACAGAGAAAACCGTCCGAACACAAGCTA  
ACTTCGGACAGCTTTCAGCACTCAAACGGAGAAAAGCTGTCTCGAACACAAGCCA  
ACTTCGGACACCTTCAGCCTCCTTACAGAGAAAAGTGTCCGAACACAAGCCA  
ACTTTGGACACCTTCGCGCTCAAACGGAGAAAAGCTGTCTGAACACAAGGCC  
ACTTCGGACACCTTCAGCGCTCAAACGAGTCAAAGCTGTCTCGAACCTATGCTA  
ACTTCGGACAGCTTTAGGACTCAGACAGAGAAAAGTGTCCGAACATAAGTTA  
ACTTCGGACAGCTTTCAGCACTCAAACGGAGAAAAGCTGTCTCGAACACAAGCCA  
ACTTCGGACACCTTCAGCCTCCTTACAGAAAAAGCTGTCTCGAACACAACCA  
ACTTTGACAGCTTTCAGCGCTCAAACGAGGAAAAGCTGTCTCGAACCTATGCCA  
ACTTCGGACAGCTTCAAGCTCCAGACAGGGAAAAGCTGTCTCGAACACAAGCCAACTTCGGACA  
> AAGCTGTCTTG Con:1 reps=33 [5404130,5406169] l-int=2040 l-seq = 52  
AAGCTGTCTGAAGTTACCTTAAGTTCGAACAGCCTGACTCCGAAAAACCTTA  
AAGCTGTCTGAACCTACCCACCTTCGGACAGCTTGACTCCCTAAAACCCAA  
AAGCTGTCTGAACCTACTCCACCTTCGGACAGCTTGACTCCCTAAAACCCAA  
AAGCTGTCTGAACCTACCCACCTTCGGACAACCTTGACTCCGAAAAACCCAA  
AAGCTGTCTGAACCTACTCCACCTTTGGACAACCTTGACTCCGAAAAACCCAA  
AAGCTGTCTGAACCTACTCCACCTTTGGACAACCTTGACTCCGAAAAACCCAA  
AAGCTGTCTGAACCTACCTTGACTTCGGACAACCTTGACTCCGAAAAATCCAA  
AAGCTGTCTGAACCTACCTTGACTTCGGACAACCTTGACTCCGAAAAATCCAA  
AAGCTGTCTGAACCTACTCCACCTTCGGACAACCTTGACTCCGAAAAACCCAA  
AAGCTGTCTGAACCTACCCACCTTCGGACAGCTTGACTCCTAAAACCCAA  
AAGCTGTCTGAACCTACTCCACCTTCGGACAGCTTGACTCCCTAAAACCCAA  
AAGCTGTCTCGAACCTACTCCACCTTCGGACAGCTTGACTCCCTAAAACCCAA  
AAGCTGTCTGAACCTACCCACCTTCGGACAGCTTGACTCCCTAAAACCCAA  
AAGCTGTCTCGAACCTACTCCACCTTTGACAGCTTGACTCCCTAAAACCCAA  
AAGCTGTCTCGAACCTTCCACCTTCGGACAGCTTGACTCCCTAAAACCCAA  
AAGCTGTCTCGAACCTACCCACCTTCGGACAACCTTGACTCCCTAAAACCCAA  
AAGCTGTCTGAACCTAATCCACCTTTGGACAACCTTGACTCCGAAAAACCCAA  
AAGCTGTCTGAACCTACTCCACCTTTGGACAACCTTGACTCCGAAAAACCCAA  
AAGCTGTCTGAACCTACTCCACCTTTGGACAACCTTGACTCCGAAAAACCCAA

AAGCTGTCGAACCTACCCTGACTTCGGACAACCTTGACTCCGAAAAATCCAA  
AAGCTATCTGAACCTACTCCACCTTCGGACAACCTTGACTCCGAAAAACCCAA  
AAGCTGTCGAACCTACTCCACCTTTGGACAACCTTGACTCCGAAAAACCCAA  
AAGCTGTCGAACCTACCCTGACTTCGGACAACCTTGACTCCGAAAAATCCAA  
AAGCTATCTGAACCTACTCCACCTTCGGACAACCTTGACTCCGAAAAACCCAA  
AAGCTGTCGAACCTACCCACCTTCGGACAGCTTGACTCCTAAAAACCCAA  
AAGCTGTCGAACCTAATCCACCTTCGGACAGCTTGACTCCCTAAAAACCCAA  
AAGCTGTCGAACCTACTCCACCTTCGGACAACCTTGACTCCGAAAAACCCAA  
AAGCTGTCGAACCTTCCCCACCTTCGGACAGCTTGACTCCCTAAAAACCCAA  
AAGCTGTCGAACCTACCCTGACTTCGGACAACCTTGACTCCGAAAAACCCAA  
AAGCTGTCGAACCTACCCTGACTTCGGACAGCTTCACTCCTAAAAACCCATA  
AAGCTGTCGAACATTACTCGACTTCGGACAGCTTCACTCCTAAAAACCCATA  
AAGCTGTCGAACATTACTCGACTTCGGACAGCTTGACTCCTAAAAACCCATA  
AAGCTGTCGAACCTTCCCCACCTTCGGACAGCTTCACTCCTAAAAACCCATA  
AAGCTGTCGAACCTACCCTGACTTCGGACAGCTTCACTCCTAAAAACCCATT  
AAGCTGTCGAACCTTCCCGACTTCGGACAGCTTGACCGCTCAAATCAAA  
AAGCTGTCGAACCTACCTCACCTTCGGACAGCTTGACTCCCAAGAAAGCTAAAAAGCTGTC

**B. mesonae (NZ KV440949.1).** All tandem repeats with repeat 52-53

Signal sequences: **TTTTC** and **TTCAT**

```
> TTTTTACCGC Con:1 reps=7 [69909,70770] l-int=862 l-seq = 53
TTTTTACCGCTTAACCCCTGGTTGAGGCGCTGCCCGGGCAAAATCAAGACTTCT
TTTTTACCGCTGACCTGGAATTGTGGTGCTGATCGGCAGAATCATGCCACTA
.....
TTTTTACCGGGTGACCCCTTCTCAGCACACCGCGGTAATAGAACTTTTTC
TTTTTACCGCTTGACCTCCTTCTAAGCACTCCGCGGGCAATAGAACCCTCTTC
TTTTTACCGCCTGACCCCTACTCAGCACTCCTCGGGCAATAGAACCATTTTC
TTTTTACCGCCTAACCCATACTCAGCACTCCTCGGGCAATAGAACCCTCTTC
TTTTTACCGCCTCACACCCTTCAAAGGACCCAGCGGGCAATAGAACCATCTAC
TTTTTACCACCTTACCCTTCCGAGACCCAGCGGGCAATAGACCCTCTTCTTTTTACCGC
> TCTACGTTAC Con:1 reps=9 [122623,123151] l-int=529 l-seq = 52
TCTACGTTACATTACAGTCTTTTTTTCGCTCTTTTCGGTCACGTAGACCCCT
TCTACGTTACCCTACTGCCTTTTTTTCACTCTTTTCAGTCACCTAGACCCCT
TGTACGTTACCCTACTGCCTTTTTTTCACCTCTTCGGTCACGTTGACCCTT
TCTACGTTACCTTACATGCTTCCTTTTCATTCTTTTGTACGTAGACCCCT
TCTACGTTACCCTACAGCCTGGCTTTTCACTCTTTTCGGTCACGTAGACCCCT
TCTACGTTACCCTACAGCCTGGCTTTTCACTCTTTTCGGTCACGTAGACCCCT
TCTACGTTACCCTAATGCCTTTTTTTCACCTCTTCGGTCACGTAGACCCCT
CCTATGTTACCCTAATGCCTTTTTTTCACCTCTTCGGTCACGTAGACCCCT
TCTACGTTACCTACAACCTTTTTTTCACCTTTTCGGTCACGTAGACATCC
TCTACGTTACCTACAACCTTTTTTTCACCTTTTCGGTCACATAGACATCCTCTACGTTAC
> AACCTCTCTA Con:1 reps=6 [247094,247364] l-int=271 l-seq = 52
AACCTCTCTACGTGACCCCTACGACCACATTTTCATCCGGTTCGGTCACGTAT
AACCTCTCTACGTGACCACACGATCACTTTTTCATCCGGTTCGGTCACGTAT
AACCTCTCTACGTGACCACACGATCACTTTTTCATCCGGTTCGGTCACGTAG
AACCTCTCTACGTGACCCTACGACCACATTTTCATCCGGTTCGGTCACGTAG
AACCTCTCTACGCGACCACACGACCACATTTTCATCCGGTTCGGTCACGTAGAACCTCTCTA
> ACCTTTTTCT Con:1 reps=9 [263113,263539] l-int=427 l-seq = 52
ACCTTTTTCTTTCAGCTACGGTCGCGTAGAACCTCTCTATGTGACCCAACATC
ACCTTTTTCTTCTGCTACGGTCGCGTAGAACCTCTCTACGTGACCCAACATC
ACCTTTTTCTTTCGTCTACGGTCGCGTAGAACCTCTCTATGTGACCCAACATC
ACCTTTTTCTTCTGCTGCGGTCACTTAGAACCTCTCTATGTGACCCAACATC
ACCTTTTTCTTTCGTCTACGGTCACTTAGAACCTCCCTACGTGACCGAACATC
ACCTTTTTCTTTCGGCTACGGTCACGTAGAACCTCCCTACGTGACCCAACATT
ACCTTTTTCTTTCAGCTACGGTCGCGTAGAACCTCTCTATGTGACCCAACATC
ACCTTTTTCTTTCAGCTACGGTCACGTAGAACCTCTTTACGTGACCGAACATCACCTTTTTCT
> AAGACAGTTT Con:1 reps=4 [309597,309763] l-int=167 l-seq = 52
AAGACAGTTTGGAGATATTATTACTGATTTTGTCTAAACAAGACTTATTA
AAGACAGTTTATTAGATTTTTCAAACTGTTTGTCTCAAGAAGCCTTATTG
AAGACAGTTTATATGATTTTTCAAACTGTATTGTCTCAAGAAGCCTTATTGAAGACAGTTT
> CCTCTATGTG Con:1 reps=5 [379346,379564] l-int=219 l-seq = 52
CCTCTATGTGCACTTACCGAGCTTTTTCCATCGATTTAGTGTTCATTGAGAC
CCTCTATGTGCACTTCACAAGCTTTTTCAATCGGTTTCATTTCATTGAGAT
CCTCTATGTGCACTTACCGAGCTTTTTCCATCGATTTTGTGTTCATTGAGAC
CCTCTATGTGCACTTCACAAGCTTTTTCAAAACCGTTCCGTGTTCATTGAGACCCCTCTATGTG
> TATCGAAGAC Con:1 reps=4 [512977,513195] l-int=219 l-seq = 52
TATCGAAGACATTTTCCGATGCTTCTACCTTCGTTTTTTCCTCAAGATGCCT
TATCGAAGACAAATTCTACCACTTCCACCCGCGTTTTGTCTCAAGGACCC
TATCGAAGACATTTTTCGCCGCTTCTACCTTCGTTTTGTCTCAAGATGCCT
TATCAAAGACAAATTCTACCGCTTTCCACAGGTTTTGTCTCAAGACGCCTTATCGAAGAC
> AAAGTGTTTC Con:1 reps=8 [834005,834379] l-int=375 l-seq = 52
AAAGTGTTTCTAATCGAGGCTGTTGGCGACATAACTCAGTGTAATAAATGAGT
AAAGTGTTTCCAATCAAGGCTATTGGCGACATAACTCAGTGTAATAAATGAGT
AAAGTGTTTCCAATCAAGGCTATTGACGACATAGCTTGGTGTAATAAATGAGT
AAAGTGTTTCCAATCTGGGCTATTGGTGACATAACTCGGTACATAAATGAGT
AAAGTGTTTCCAATCGAGGCTATTGGCGACATAGCTCAGTATAAATACTGA
AAAGTGTTTCCAATCAAGGCTGTTGGCGACATAACTCAGTGTAATAAAGCTGA
AAAGTGTTTCCAATCAAGGCTATTGGCGACATAACTCGGTACATAAATGAGGAAAGTGTTTC
> GGGCACGTTAG Con:1 reps=7 [972202,972524] l-int=323 l-seq = 52
```

[illegible]

CTTTATTTTGACCGGTGACCTCCTTCTTGCTACCTTTGCGGGAAGAATTACGC  
 CTTTATTTTGACCGACGACCTTCTTCTTGGTACCTTCACGGAAGAATCAGAC  
 CTTTATTTTGACCGGTGACCTCCTTCTTGGTACCTTTGCGGGAAGAATCGGAC  
 CTTTATTTTGACCGGTGACCTCCTTCTTGATACCTTTGCGGGAAGAATTACGC  
 CTTTATTTTGACCGGCGACCTCCTTCTTGTTACCTTTGCGGAAAGAATCAGACTTTATTTTG  
 > ACCTTTTTCA Con:1 reps=5 [1916684,1916902] l-int=219 l-seq = 52  
 ACCTTTTTCATAGAGCTTCCTCTTTTTCGGGCAATGCACCCCACTCTCATCG  
 ACCTTTTTCATAGAGTTCCCTCTTTTTTGGGCAATGCAACCCCACTCTCATTT  
 ACCTTTTTCATAGAGTTCCCTCTTTTTCGGGCAATGCAACCCCGCTTGCATTT  
 ACCTTTTTCATTGAGTTTCCTCTTTTTTtaggCAATGCAACCCCACTTTTCATTTACCTTTTTCA  
 > TTTTGTCTT Con:1 reps=11 [1920272,1920905] l-int=634 l-seq = 52  
 TTTTGTCTTTTTCATCGGGCTTATGAAGGACATTCCGGACCTGGATCCCGCCTG  
 TTTTGTCTTTTTCATCGACTCTATGAAGACCATTTTGGACTTGACCCACGCCTG  
 TTTTGTCTTTTTCATCAGCCTTATGAAGACCATTTTGAAGTAGCTCCCGGCTA  
 TTTTGTCTTTTTCATCTGCCTTATGAAGACCATTTTGGACTTAACCCACGCCTG  
 TTTTGTCTTTTTCATCGACCCTATGAAGACCATTTTGGCCTTGACCCACGACTG  
 TTTTGTCTTTTTCATCAGCCTTATGAAGACCATTTTGAACCTGGCTCCCGCCTA  
 TTTTGTCTTTTTCATCAGCCTTATGAAGACCATTTTGAACCTGGCTCACGCCTG  
 TTTTGTCTTTTTCATCAACTTATGAAGACCATTTTGGTCTGGTTCCCGGCTA  
 TTTTGGCTTTTTCATCGACCTTATGAAGACCATTTCCGACTTAACCCACGCCTG  
 TTTTGTCTTTTTCATCGACCCTATGAAGACCA  
 TTTTGGCTTGACCCACGACTG  
 TTTTGTCTTTTTCATCGACCCTATGAAGACCATTTTAGCCTTGACCCACGCCTG  
 TTTTGTCTTCTCGACCCTATGAGGACCATTTTGGACCTGGCTCCCGCCTGTTTTGTCTT  
 > AAGTGTCTCC Con:1 reps=7 [1939675,1940049] l-int=375 l-seq = 52  
 AAGTGTCTCCAATAAGCTTTTCATTGGAGACAAAACCTCTCTTTTTTAACGAG  
 AAGTGTCTCCAATAAGCTCCATTGAAGACAAAATCCGCTTCCTTTTCACGAA  
 AACTGTCTTTAATAAGCTTTTCATTGAAGACAAAATCCACTCTTTTTTCACGAA  
 AAGTGTCTCCAATAAGCTTTTCATTCAAGACAAAACCCGCTCCATGTTTCACGAG  
 AAGTGTCTCCAATAAGCTCCATTGAAGACAAAATCCGCTCTTTTTTCACGAG  
 AAGTGTCTCCAATAAGCTCCATTGGAGACAAAACCCACTCTTTTTTCACGAA  
 AAGTGTCTCCAATAAGCTTTTCATTGGAGACAAAACCTCTCTATTTTTTACGAAAAGTGTCTCC  
 > TATGAAGGAC Con:1 reps=6 [1954829,1955099] l-int=271 l-seq = 52  
TATGAAGGACATTTTGAACCTGGTTCCCAGCTATTTTGGCTTTTTCATCGGATT  
TATGAAGGACATTTTGAACCCGGGTCCCAGCTATTTTGGTCTTTTCATCGGGTT  
TATGAAGGACATTTTGAACCCGGGTCCCAGCTATTTTGGTCTTTTCATCGGGCT  
TATGAAGGACATTTTGAACCCGGGTCCCAGCTATTTTGGTCTTTTCATCGGGCT  
TATGAAGGACATTTTGAACCCGGGTCCCAGCTATTTTGATCTTTTCATCGGGCTTATGAAGGAC  
 > TTGACCAAAA Con:1 reps=4 [1966100,1966266] l-int=167 l-seq = 52  
 TTGACCAAAAATAGTGATAAATCCTCTAAAAAGGGTAATGCAATATGGTTCTT  
 TTGACCAAAAATAGTGATAAATCCTCTAAAAAGGGTAATGCAATATGGTTCTT  
 TTGACCAAAAATAGTGAAAAATCCTCTAAAAAGGGTAATGCAACGGGCTTCTTTGACCAAAA  
 > CAAAATGGTC Con:1 reps=10 [2290722,2291200] l-int=479 l-seq = 52  
 CAAAATGGTCTTTTCATCAACCTTATGAAGACCAGTTCTCTTCGGCTTTTTCATC  
 CAAAATGGTCTTTTCATCAACCTTATGAAGACCAGTTCTCTTCGGCTTTTTCTTT  
 CAAAATGGTCTTTTCATCAACCTTATGAAGACCAGTTCCCTTCGGCTTTTTCATC  
 CAAAATGGTCTTTTCATCACACTTATGAAGACCATTTCTCTTCGGCTTTTTCGTT  
 CAAAATGGTCTTTTCATCACACTTATGAAGACCATTTCTCTTCGGCTTTTTCATC  
 CAAAATGGTCTTTTCATCACACTTATGAAGACCATTTCTCTTCGGCTTTTTCATC  
 CAAAATGGTCTTTTCATCACCTTTATGAAGACCATTTCCCTTCGGCTTTTTCGTT  
 CAAAATGGTCTTTTCATCACACTTATGAAGACCATTTCTCTTTGGCTTTTTCATC  
 CAAAATGGTCTTCAACAACCTTATGAAGACCATTTCTCTTTGGCTTTTTCATCCAAAATGGTC  
 > GGTTCGTGT Con:1 reps=9 [2299724,2300151] l-int=428 l-seq = 52  
 GGTTCGTGTTTTCATTGAAGCCCTCTATGTGCACCTTTTCATCGTTTTTTTCATT  
 GGTTCGTGTTTTCATTGAAATCCTCTATGTGCACTTTCCCTCGCCTTTTTCATC  
 GGTTCGTGTTTTCATTGAAGACCTCTATGTGCACTTTCCCTCGCTTTTTTCATT  
 GGTTCGTGTTTTCATTGAAGACCTCTATGTGCACTTGCCCTCCCTTTTTTCATT  
 GGTTCGTGTTTTCATTGAAGACCTCTATGTGCACTTTCCCTCGTTTTTTTCATT  
 GGTTCGTGTTTTCATTGAAGACCTCTATGTGCACTTTCCCTCGCTTTTTTCATC  
 GGTTCGTGTTTTCATTGAAGCTCTCTATGTGCACTTGCCCTCGCTTTTTTTATC  
 GGTTCGTGTTTTCATTAAAGACCTCTATGTGCACTTTCAAACGTTTTCTCATTGGTTTCGTGT  
 > CACGTAGAAC Con:1 reps=5 [2317829,2318047] l-int=219 l-seq = 52  
 CACGTAGAACCTTTTTACGTTACCCATCTGCTTGATTTTTCGACCTTTTCGGG  
 CACGTAGAACCCTCTACGTTACCCATCTGCTTGATTTTTCGATCTTTTGGG  
 CACGTAGAACCCTTCTACGTTACCTATCTGCTTGGTTTTTCGTCCTTTTCGGG

CACGTAGAACCTTTCTACGTTACCCATTGACTTGGTTTTTCAGCCTTTTCGGACACGTAGAAC  
> AAAGTCACGT Con:1 reps=8 [2327343,2327770] l-int=428 l-seq = 52  
AAAGTCACGTAGTAACCTTCTACGTGACCGTACTTCCTTTTTTCCCTGCTCT  
AAAGTCACGTAGAAACCTTATACGCGACCGTACCTCCCTTTTTTCTGCTCT  
AAAGTCACGTAGAAACCTTATACAGACCTTACCTCCCTTTTTTCTGCTCT  
AAAGTCACGTAGAAACCTTCTACGTGACCTTACCTCCCTTTTTTCTGCTCT  
AAAGTCACGTAGAAACCTTCTACGTGACCGTACTTTCCTTTTTTCCCTGCTCT  
AAAGTCACGTAGAACTTCTCTACGTGACCGAATTTCCCTTTTTCCCTGCTCC  
AAAGTCACGTAGAACTCCTCTACGTGACCTTACCTCCCTTTTTTCCTTGCCCA  
AAAGGCACGTTGAAACCTTCTACAAGACCAAACCACTCTTTTTCCTTGCTCCAAAGTCACGT  
> CTCATGAACC Con:1 reps=4 [2333462,2333680] l-int=219 l-seq = 52  
CTCATGAACCCTTTATGAGAACAAATTGCAGCACTTTCCTTACCAGTCTGTT  
CTCATGAACCCTTCTATGAGAACTGGCCAGACCCCGCTTGATCCCTTTCTGTC  
CTCACGAACCTTTATGAGAACAAATTGCAGCACTTTCCTTACCAGTCTGTC  
CTCATGAACCCTTCCATGAGAACTCGCTTGGCCCTGCTTGACCCTTTTCTGTTCTCATGAACC  
> GATGAAGGAC Con:1 reps=7 [2344320,2344642] l-int=323 l-seq = 52  
GATGAAGGACATTTTCCATGGGAAACCTGCTTCGTTTGGTCTCCATCACGCC  
GATGAAGGACATTTTGCATGGGAAGCTGCTTCGTTTGGTCTTTCATCACGCT  
GATGAAGGACATTTTGCATGCGAAACCTGCTTCGTTTGGTCTTTCATCACGCC  
GATGAAGGACATTTTGCATGGGAAGCTGCTTCGTTTGGTCTTTCATCACGCC  
GATGAAGGACATTTTGCATGCGAAACCTGCTTCGTTTGGTCTTTCATCACGCC  
GATGAAGGACATTTTGCATGGGAAACCTACTTCGTTTGGTCTCCATCACGCCGATGAAGGAC  
> TGGAACTACT Con:1 reps=13 [2347811,2348444] l-int=634 l-seq = 52  
TGGAACTACTTCTCGCGGTTTTCTGCAAGTTTTGTTTCCAATGACCCTGAT  
TGGAACTACTTCTCATGTTTTTTCTCCGAGTTTGTTCCTCAATGACCCTGAT  
TGGAACTACTTCTCTCTTTTTTCTCCAAGTTTTGTTTCCAATGACCCTGAT  
TGGAACTCACTTTTCGTGGGTTTTCTCCGAGTTTGTTCCTCAATGACCCTGAT  
TGGAACTCACTTTTCTCTTTTTTCCTCTCAGTTTTGTTTCCAATGACCCTGAT  
TGGAACTACTTCTCTCTTTTTTCTCCAAGTTTTGTTTCCAATGACCCTGAT  
TGGAACTCACTTTTCGTGGGTTTTCTCCGAGTTTGTTCCTCAATAACCCTGAT  
TGGAACTCACTTTTCTCTTTTTTCCTCTCAGTTTTGTTTCCAATGACCCTGAT  
TGGAACTACTTCTCTCTGTTTTTTCTCCGAGTTTGTTCCTCAATAACCCTGAT  
TGGAACTCACTTTTCTCTTTTTTCCTCTCAGTTTTGTTTCCAATGACCCCGAT  
TGGAACTCACTTTTCTCTCTTTTTCTCCGAGTTTGTTCCTCAATAACCCTGAT  
TGGAACTCACTTTTCTCTCTTTTTCCTCTCAGTTTTGTTTCCAATGACCTCGAATGGAATCACT  
> AAAATGGTCT Con:1 reps=11 [2363645,2364175] l-int=531 l-seq = 52  
AAAATGGTCTTTCATCATCCTTATGAAGGACATTTCTCTTGGCTTTTCTTTC  
AAAATGGTCTTTCATCTCCCTTATGAAGGACTTTTCTCTTCGGCTTTTCATTC  
AAAATGGTCTTTCATCAACCTTATGAAGGACTTTTCTCCTCGGCTTTTCATCC  
AAAATGGTCTTTCATCAACCTTATGAAGGACATTTCTCTTGGCTTTTCATCC  
AAAATGGTCTTTCATCTCCCTTATGAAGGACTTTTCTCTCAGATTTTTCATCC  
AAAATGGTCTTTCATCTCCCTTATGAAGGACATTTCTCTCAGATTTTTCATTC  
AAAATGGTCTTTCATCATCCTTATGAAGGACATTTCTCTCAGATTTTTCATCC  
AAAATGGTCTTTCATCATCCTTATGAAGGACATTTCTCTTGGTTTTTCATCC  
AAAATGGTCTTTCATCAACCTTATGAAGGACATTTCTCTTGGCTCTTTCATCC  
AAAATGGTCTTTCATCAACCTTATGAAGGACATTTCTCTTGGTTTTTCATCCAAAATGGTCT  
> TCTACGTTAC Con:1 reps=5 [2367649,2367868] l-int=220 l-seq = 52  
TCTACGTTACCTAAGCTCTTTTTTTTCTCCCACTCGGGCACGTAGAAACCCC  
TCTACGTTACCCAAGCTTCTATTTTTCCTCCGATTCGGGCACCTAGACCCCC  
TCTACGTTACCTCAAGCCCTATTTTCCTATCGTTCGGGCACGTAGAACCTC  
TCTACGTTACCCAAGCCCTGATTTTTCCTCCGTTTCGGGCATCTAGAACCTTCTACGTTAC  
> CTTATTGAAG Con:1 reps=5 [2472381,2472599] l-int=219 l-seq = 52  
CTTATTGAAGACAGTTTTAGTAGTTTTCGTAGCGATTTTGTCCCCAAGAGGC  
CTTATTGAAGACAGTTTTAGTAGTTTTCGCAGCGGTTTTGTCTCCAAGAGGC  
CTTATTGAAGACAGTTTTAGTAGTTTTCGCAGCGGTTTTGTCTCCTAGAGGC  
CTTATTGAAGACAGTTTTAGTAGTTTTAACAGCAGGTTTTGTCTCCAAGAGGCCTTATTGAAG  
> TCTACGTTAC Con:1 reps=15 [2481435,2482171] l-int=737 l-seq = 52  
TCTACGTTACCTTGACCCTTATTTTTTGTCTGGGTGGGCACCGTAGACACCT  
TCTACGTTACCTTAAACCTTATTTTTTGTCTGGGTGGGCACGTAGACACCC  
TCTACGTTACCTTAAACCTTATTTTTTGTCTGGGTGGGCACGTAGACACCC  
TCTACGTTACCTTGACCCTTATTTTTTACCTGATTGGGCACGTAGACACCC  
TCTACGTTACCTTGACTCTTATTTTTTGTCTGGGTGGGCACGTAGACACCT  
TCTACGTTACCTTAGAACCTTATTTTTTGTCTGGGTGGGCACGTAGACACCC  
TCTACGTTACCTTGACCCTTATTTTTTGTCTGGGTGGGCACGTAGACGCT  
TCTACGTTACCTTAGAACCTTATTTTTTACCTGATCGGGCACGTAGACACCC



TCTACGTTACCCCTTAACCCCTTATTTTTTAGCTGGGTGGGCACGTAGACACCT  
 TCTACGTTACCCCTTAACCCGTATTTTTTAGCTGATCGGGCACGTAGACACCC  
 TCTACGTTACCCCTTGACCCTTATTTTTTGCCCTGATCGGGCACGTAGACGCCT  
 TCTACGTTACCTTAGAACCTTATTTTTTACCTGATCGGGCACGTAGACACCC  
 TCTACGTTACCCCTTAAACCTTATTTTTTACATGATCGGGCACGTAGACGCCT  
 TCTACGTTACCCCTTGACCCGTATTTTTTAGCTGGGCGGGCACGTAGACACCCCTCTACGTTAC  
 > TTATGAAGAC Con:1 reps=7 [2583930,2584252] l-int=323 l-seq = 52  
 TTATGAAGACCAAAATTCTCTTCTGATTCCTCCAAAATGGCCTTCATCCTTC  
 TTATGAAGACCATTTTCCTCTTCTGTCTCCTCCAAAATGGTCTTCATCCTTT  
 TTATGAAGACCAAAATTCTCTTCTGACTCCTCCAAAATGGTCTTCATCCTTC  
 TTATGAAGACCAATATTCTCTTCTGATTCCTCTAAAATGGTCTTCATCCTTC  
 TTATGAAGACCATTTTCCTCTTCTGACTCCTCCAAAATGGTCTTCATCCTTC  
 TTATGAAGACCAAAATTCTCTTCCGAATCCTCCAAAATGGTCTTCATCCTTCTTATGAAGAC  
 > TGCTGTCTGA Con:1 reps=15 [2650478,2651320] l-int=843 l-seq = 52  
 TGCTGTCTGAAAAGGAAATTTGAATGTAGAGAACAAGTAGAGAGGCTCTAGG  
 TGCTGTCTGAGAAGGAAAATTGAGTATAGAGAGCAAGTAGAAAGGTTCTAGC  
 CGCTGTCTGAAAAGAAAATAGGGTTTAGAGGGCAAGTAGAAAGGTTCTAGCT  
 GCTGTCTTGAAGGGAAAATTGAGTATAGAGAGCAAGTAGAAAGACGCTAGG  
 TGCTGTCTGAAAAGAAAAATTGGGTTTCAAGAGCAAGTAGAAAGGCCCTAGG  
 TGCTGTCTGAAAAGAAAATTGAGTATAGAGAGCAAGTAGAAAGACGCTAGG  
 TGCTGTCTGAAAAGAAAATTGAGTATAGAGAGCAAGTAGAAAGACGCTAGG  
 TGCTGTCTGAAAAGAAAAATTGGGTTTCAAGAGGAAATAGAAAGGCCCTAGC  
 TGCTGTCTGAAAAGAAAATTGAGTATAGAGAGCAAGTAGAAAGACGCTAGG  
 TGCTGTCTGAAAAGAAAATTGAGTATAGAGAGCAAGTAGAAAGACGCTAGG  
 TGCTGTCTGAAAAGAAAATTGGGTTTCAAGAGCAAGTAGAAAGGCCCTAGC  
 TGCTGTCTGAAAAGGAAATTTGAATGTAGAGAACAAGTAGAGAGGCTCTAGG  
 TGCTGTCTGAGAAGGAAAATTGAGTATAGAGAGCAAGTAGAAAGGCGCTAGG  
 TGCTGTCTGAAAAGAAAATTGAGTATAGAGAGCAAGTAGAAAGACGCTAGG  
 TGCTGTCTGAAAAGAAAATTGGGTTTCAAGAGCAAGTAGAAAGGCCCTAGC  
 TGCTGTCTGAAAAGGAAATTTGAATGTAGAGAACAAGTAGAGAGGCTCTAGCTGCTGTCTGA  
 > GCATAAAAAA Con:1 reps=7 [2851663,2851985] l-int=323 l-seq = 52  
 GCATAAAAAATCATCGAAACTGTCTTCAATAAGCCGTCTTGATACAAAACG  
 GCATAAAAAATCATCGAAACTGTCTTCAATAAGCCGTCTTGAAGACAAACCA  
 GCATAAAAAATCATCGAAACTGTCTTCAATAAGCCGTCTTGATACAAAACG  
 GCATAAAAAATCATCGAAACTGTCTTCAATAAGCCGTCTTGATACAAAACG  
 GCATAAAAAATCATCGAAACTGTCTTCAATAAGCCGTCTTGAAGACAAACCA  
 GCATAAAAAATCATCGAAACTGTCTTCAATAAGCCGTCTTGAAGACAAACCAGCATAAAAAA  
 > ATGAGAACTG Con:1 reps=7 [2907285,2907659] l-int=375 l-seq = 52  
 ATGAGAACTGGAATCACGAAAAGCAAGGCCATTTTGTCTCATGAAGCGTTC  
 ATGAGAACTGGAACCAAGAAAAGCGCGGTAGTTTTGTCTTTCATGAAGCGTTC  
 ATGAGAACTGAAACCAAGAAAAGACGCGCGTCTTGTCTCATGAAGCGTTC  
 ATGAGAACTGAAACCAGGAAAAGCGCGCGGTCTTGTCTCATAAAGCGTTC  
 ATGAGAACTGAAACCAGGAAAAGCGTGCGGTCTTGTCTCATGAAGCGTTC  
 ATGAGAACAGATACCAAGAAAAGAGCGACGTCCTTGTCTCATGAAGCGTTT  
 ATGAGAACTGGAACCACGGAAAACGAGGCCGTTTTGTCTCATGAAGTTTCATGAGAACTG  
 > TGCATTGCC Con:1 reps=6 [2912216,2912485] l-int=270 l-seq = 52  
 TGCATTGCCCAAAACCGGGAGAGCGCAATTTTGGTCAAAGGAAGAGGG  
 TGCATTGCCCAAAATCGTGAGAGCGGCTATTTTGGTCAAAGGAATGGGA  
 TGCATTGCCGAAAAACGGGAAGAGCCACTAATTTGGTCAAAGGAAGAGGGA  
 TGCATTGCCCAAAACCGGAAGAGCCACTAATTTGTCTCAAAGGAAGAGGGA  
 TGCATTGCCGAAAAACGGGAAGAGCCACTAATTTGGTCAAAGGAAGAGAGTTGCATTGCC  
 > ATGAAGACCA Con:1 reps=14 [2922406,2923195] l-int=790 l-seq = 52  
ATGAAGACCAAAATAGCCAGGCGCAGATAAGAAATGGTCTTCATAAAGCGGG  
ATGAAGACCAAAACAGTCGTGGTGCAGGTAAGAAAAGGTCTTCATAAGCGGG  
ATGAAGACCAAAACAGTCGTGGTGCAGGTAAAGAAATGGTCTTCATAAGCGGG  
ATGAAGACCAAAATAGCTGTGGTGCAGGTGCGAAATGGTCTTCATAAAGCGGG  
ATGAAGACCAAAACAGCCGTGGCCGAGGTGCGAAATGGTCTTCATAAAGCGGG  
ATGAAGACCAAAACAGCCGGTTGTAGGTAAAGAAATGGTCTTCATAAAGCCGA  
ATGAAGACCAAAACAGCTGTGGCCGAGGTAAAGAAATGGTCCTTCAAGCAGG  
ATGAAGACCAAAACAGCTGTGGCCGAGGTAAAGAAATGGTCTTCATAAAGCGGG  
ATGAAGACCAAAACAGCCGTGCCGAGGAACGAAAAGGTCTTCATAAAGCGGG  
ATGAAGACCAAAACAGCTGTGGCCGAGGTAAAGAAATGGTCCTTTATAAGCCGA  
ATGAAGGCCAAACAGCTGTGGCCGAGGTAAAGAAATGGTCCTTTATAAGCCGA  
ATGAAGACCAAAACAGCCGTGGCCGAGGAACGAAAAGGTCTTCATAAAGCCGA  
ATGAAGACCAAAACAGCCGTGCCGAGGAACGAAAAGGTCCTTAATAAACCGA

ATGAAGACCAAAACAGCCGTGGCCGAGGAACGAAATGATCTTCACAAGCAGG  
ATGAAGATCAAAACAGCTGTGGCCGAGGAATGAAATGGTCTTCATAAGCCGAATGAAGACCA  
 > GATGAAGGAC Con:1 reps=8 [2936759,2937132] l-int=374 l-seq = 52  
GATGAAGGACAAAACAGGCGGGATCCAGGTCCAAATGGTCTTCATAAGGCT  
GATGAAGGACAAAACAGGCGGGAGCCAAGTTCAAAATGGTCTTCATAAGGCT  
GATGAAGGACAAAACAGGCGGGATCCAGGTTCAAAATGGTCTTCATAAGGCT  
GATGAAGGACAAAACAGGCGGGATCCAGGTTCAAAATGGTCTTCATAAGGCT  
GATGAAGGACAAAACAGGCGGGATCCAGGTTCAAAATGGTCTTCATAAGGCT  
GATGAAGGACAAAACAGGCGGAATCCAGGTCTAAAATGGTCTTCATAAGGCT  
GATGAAGGACAAAACAGGCGGGAGCCAAGTTCAAAATGGTCTTCATAAGGCTGATGAAGGAC  
 > AAAGTGTCTT Con:1 reps=4 [2942377,2942598] l-int=222 l-seq = 52  
 AAAGTGTCTTTAATAAGGAATCTTGGAGACAAACCGCCCTACAGAAATTGAG  
 AAAGTGTCTTCAAAAAGGTTCTTCTTGTAGACAAACGGCCCTACAAAATGGAG  
 AAAGTGTCTTCAAAAAGGTTCTTGGAGACAAACCGCCCTACAAAATGGAG  
 AAAGTGTCTTCAATAAGGCTTCTTAAGGACAAAATGCCTTACAAAATAGTGAAAACTGTCTT  
 > GACCGAGCAG Con:1 reps=12 [3080314,3080998] l-int=685 l-seq = 52  
 GACCGAGCAGCAGGAAAAATAGTCGAAAGGGTCGCATAGAGAGGTTATATCC  
 GACCGAGCAGCTGGAAAAATAGTCGGTAGGGTCGCATAGAGAGGTTCTAGGC  
 GACCGAGCAGCTGGAAAAATAGTCGGTAGGGTCGCATAGAGAGGTTCTAGGC  
 GACCGAGCAGCTGGAAAATAGGAAGAAGGGTCGCGTAGAGAGGCCCTACGC  
 GACCGAGCGGCTGAAAAATTAGGAAGAAGAGTCGCGTAGAGAGATTCTACGT  
 GACCGAGCAGGTGGAAAAATAGGAAGAAGGGTCGCGTAGAGAGGTTCTAGGC  
 GACCGAGCAGCTGGAAAAAATAGGAAGAAGAGTCGCGTAAAGAGGTTCTATGC  
 GACCGAGCAGCTGGAAAAAAAGAAAGAAGAGTCGCGTAGAGAGATTCTACGT  
 GACCGAGCAGCTGGAAAAATAGAAAGAAGAGTCGCGTAGAGAGGTTCTATGC  
 GACCGAGCAGGTGGAAAAATAGGAAGAAGAGTCGCGTAGAGAGGTTCTATGC  
 GACTGAGCAGCTGGAAAAATAGGAAGAAGAGTCGCGTAGAGAGGTTCTAAGC  
 GACCGAGCAGCAGGAAAAAAAGAAGAAGAGTAGCGTAAAGAGGTTCTATGC  
 GACCGAGCAGCAGGAAAAAAAGGAAGAAGAGTAGCGTAGAGAGGTTCTAAGCGACCGAGCAG  
 > CAAGTAGAAG Con:1 reps=4 [3094934,3095152] l-int=219 l-seq = 52  
 CAAGTAGAAGCTCTCTAGCTGCTGTCCAAAGTCAAAAATCCAATTTAGAGAT  
 CAAGTAGAAGCCCTCTAGTTGCTGTCTAAAGCCAAAATCCAATTTAGAGAT  
 CAATTAGAAGTGCCCTAGCTGCTGTCTAAAGTCAAAAATCCAATTTAGAGGT  
 CAAGTAGAAGCCCTCTAGCTGCTGTCTAAAGTCAAAAATTCGATTTAGAGATCAAGTAGAAG  
 > GTCGCCTATA Con:1 reps=8 [3109160,3109638] l-int=479 l-seq = 52  
 GTCGCCTATAAGGTGTATACGCGACCGAACCGAAGAAAAAGAATCCCCATCG  
 GTCGCCTATAAGGTGTATACGCGACCGAACCGGAGCCAAAAGAGTCCCTCG  
 GTCGCCTATAAGGCGTATACGCGACCGAACCGGAGCCAAAAGAGTCCCTCG  
 GTCGCCTATAAGGCGTATACGCCACCGAACCGAAGCCAAAAGAGCCTTCCG  
 GTCGCCTATAAGGCGTATACGTGACCGAACCGGAGCCAAAAGAGCCTTCCG  
 GTCGCATATAACTCGTATACGCGACCGAGCGGCAGAAAAAAAGCGCTCCCCG  
 GTCGCATATAAGGTGTATACGCGACCGAACCGGAGCCAAAAGAGCCTTCCG  
 GTCGCCTATAAGGCGTATACGCGACCGAGCGGCAGAAAAAAAGCGCTCCCCG  
 GTCGCCTATAAGGCGTATACGTGACCGAACCGGCAGAAAAAAAGAGAGCCAAAGTTCGCCTATA  
 > CTATAGGCGA Con:1 reps=9 [3142771,3143197] l-int=427 l-seq = 52  
 CTATAGGCGACCGAGGAGCGAGAAAAAAAGTGAGCAGGGTAGCGTATAAGGG  
 CTATAGGCGACCGAGGGGCGAGAAAAAAAGTGAGGAGGGTAGCGTATAAGGA  
 CTATAGGCGACCGAGAGGGGAGAAAAGAAAGTGAGGAGGGTAGCGTATGAGGG  
 CTATAGGCGACCGAGGGGCGAGAAAAAAAGTGAGGAGGGTAGCGTATAAGGA  
 CTATAGGCGACCGAGAGGGGAGAAAAGAAAGTGAGGAGGGTAGCGTATGAGGG  
 CTATAGGCGACCGAGAGGGGAGAAAAAAAGTGAGGAGGGTAGCGTATAAGGG  
 CTATAGGCGACCGAGAGGGGAGAAAAAGAGCCAGCAGGGTAGCGTATAAGGA  
 CTATAGGCGACCGAGAGGGGAGAAAAAGAGCCAGCAGAGTCGCGTATAAGGACTATAGGCGA  
 > AAATGGTCTT Con:1 reps=9 [3151872,3152297] l-int=426 l-seq = 52  
 AAATGGTCTTCATAAGCGGAATGAAGGCCAAAAGGTTGTGGCTCGAGTGA  
 AAATGGTCTTCATAAGCGGAATGAAGGCCAAAATCGTTGTGGCTGGAGAGA  
 AAATGGTCTTCATAGGCTGAATGAAGGCCAAAATTAGTTGTGGCTGGAGAGA  
 AAATGGTCTTCATAAGTGGAATGAAGGCCAAAAGGCTGTGACTCGAGTGA  
 AAATGGTCTTCATAAGCGGAATGAAGACCAAAAAGGCTGTGGCACGAGTGG  
 AAATGGTCTTCATAAGCGGAATGAAGACCAAAAAGGCTGTGGCACGAGTGG  
 AAATGGTCTTCATAAGCGGAATGAAGACCAAAAACGTTGTGGCTGGGAGA  
 AAATGGTCTTCACAAGCGGAATGAAGACCAAAAAGGCTGTGACACGAGAGAAATGGTCTT  
 > TAAGAAAGGC Con:1 reps=9 [3169529,3169955] l-int=427 l-seq = 52  
 TAAGAAAGGCTCTTAAGGACAAAACGCTAGTAAAAATCAGTAGAAGTGTCTT  
 TAAGAAAGGCCCTCAAGGACAAAACGCTACTAAAAATTATAGAAGTGTCTT

TAAGAAAGGCTCTTAAGGACAAAACGCTGATGGAAATCAGTAAAAGTGTCTA  
TAAGAAAGGCTCTCAAGGACAAAACGCTAGTAAAAATTAATAGAACTGTCTT  
TAAGAAAGGCTCTTAAGGACAAAACGCTAGTTTGAATTAATAAACTGTCTT  
TAAGAAAGGCTCTCAAGGACAAAACGCTAGTGAAAATTAGTAGAACTGTCTT  
TAAGAAAGGCTCTCAAGGACAAAACGCTAGTAAAAATCAATAGGAATGTCTT  
TAAGAAAGGCTCTTAAGGACAAAACGCTGGTGAAAATTAATAGAAATGTCTTAAAGAAAGGC  
> GCGACAAAAG Con:1 reps=5 [3352830,3353048] l-int=219 l-seq = 52  
GCGACAAAAGCCGGAGCAAAAGAGAGTAAAGTGAGTCCAATGAAGAATATTG  
GCGACAAAAGCCGAAGCAAAAAAGAGTAAAGTGAGTCCAATGAAGGCTATTG  
GCGACAAAAGTCGGAGCAAAAGGAGAGCAAAAGTGAATCCAATGAAGGCTATTG  
GCGACAAAAGCCGGAGCAAAAGGAGAGGAAAGTGAATCCAATGAAGGCTATTGGCGACAAAAG  
> GTAACGTAGA Con:1 reps=8 [3498555,3498933] l-int=379 l-seq = 52  
GTAACGTAGAGCTCGTCTACGTGCCCCGCCGAAGGATTTTTTCGCTGTTAGG  
GTAACGTAGAGCTCGTCTACGTGCCCCGACCGGAGTACTTTTTCGCTGTTAGG  
GTAACGTAGAGGCTGTCTACGTGCCCCGAATGGAGTATTTTTACGCTGTAAAG  
GTAACGTAGAGCTCGTCCACTCCACGTGCCCCGCCGAGGTTTTTTCCGCAATAAGT  
GTAACGTAGAGCTTGTCTACGTGCCCCGAATGGAGTATTTTTTCGCTGTAAAG  
GTAACGTAGAGCTCGTCTACATGCCCCGCCGAGGATTTTTTCGCAATAAGT  
GTAACGTAGAGCCTGTCTACTTGCCCGAATGAAGGTTTTTACGCTATAAGGTAACGTAGA  
> GGTAAACGTAG Con:1 reps=9 [3505767,3506245] l-int=479 l-seq = 52  
GGTAAACGTAGAGCCGCTACATGCACGAAGAGATAGTATTTTAGCAGTTTG  
GGTAAACGTAGAGCCTGTCTACGTGCCCCGAAGAGATGGAAATTTAGCAGTTTG  
GGTCACTAGTAGAGCCGCTACGTGCTGAAGAGATGGAAAATTAGCAGTTTG  
GGTAAACGTAGAACCCCTCTACATGCCCCGAAGAGATGGTATTTTAGTAGTTTG  
GGTAAACGTAGAGCCCGCTACGTGCCCCGAAGAGATGGAAATTTAGCAGTTTA  
GGTAAACGTAGAGCCCGCTACGTGCCCCGAAGAGATGGAAATATAGCAGTTAG  
GGTAAACGTAGAGCCCGCTACGTGCCCCGAAGAGATGGAAATATAGCAGTTTA  
GGTAAACGTAGAGCCCGCTACGTGCCCCGAAGAGATGGAAATAGAGCAGTTAG  
GGTAAACGTAGAACCCGCTACGTGCCCCGAAGAGATAGAAGTTTAGCAGTTAGGGTAACGTAG  
> TCCATTGCC Con:1 reps=8 [3506345,3506718] l-int=374 l-seq = 52  
TCCATTGCCCAAAACGGGCTAAAACATCAAATTATGGTCAATGGAGCCCCAC  
TCCATTGCCCAAAACCGGCTAAATTATCAAATTATGGTCAATGCATCCCCGT  
TCCATTGCCCAAAACCGGTAAATCAACAAATTATGGTCAATGCATCCCCGT  
TCCATTGCCCAAAACCGGCTAAATTATCAAATTATGGTCAATGCATCCCCGT  
TCCATTGCCCAAAACCGGTAAATCAACAAATTATGGTCAATGCATCCCCGT  
TCCATTGCCCAAAACCGGTTAAATTATCAAATTATGGTCAATGGAGCCCCAT  
TCCATTGCCCAAAACCGGCTAAATTATCAAATTATGGTCAATGGAGCCCCATTCCATTGCC  
> AGCCTATTGG Con:1 reps=9 [3520892,3521318] l-int=427 l-seq = 52  
AGCCTATTGGCGACATTTCTCTTAGTAAAAACAACAAAAGTGTTCCAATAG  
AGCCTATTGGCGACATTTCTCTTAGCAAAAATAACAAAAGTGTTCCAATAG  
AGCCTATTGGCGACATTTCCCTTAGCAAAAATAACAAAAGTGTTCCAATAG  
AGCCTATTGGCGACATTTCCCTTAGCAAAAATAACAAAAGTGTTCCAATAG  
AGCCTATTGGCGACATTTCTCTTTGCAAGAACTACTAAAGTGTTCCAATAA  
AGCCTATTGGCGACATTTCTCTTTGCAAGAACTACTAAAGTGTTCCAATAA  
AGCCTATTGGCGACATTTCTCTTTGCAAGAACTACTAAAGTGTTCCAAAG  
AGCCTATTGGCGACATTTCTCTTTGCAAGAACTACTAAAGTGTTCCAATAAAGCCTATTGG  
> TGTCTGAATG Con:1 reps=8 [3527584,3527956] l-int=373 l-seq = 52  
TGTCTGAATGATTTTTTTTGCAGCCAGAGATCAGTTAGAATCCGTCTAGTTGC  
TGTCTGAATGATTTTTTTTGCAGCCAGAGATTAGTTAGAATCCGTCTAGTTGC  
TGTCTGAATGATTATTTTTTGCAGCCAGAGATCAGTTAGAATCCGTCTAGTTAT  
TGTCTGAATGATTATTTTTGCAATCAGAGATCAGTTAGAAGCAGTCTAGTTGC  
TGTCTGAATGATTATTTTTGCAGCCAGAGATCAGTTAGAAGCAGTCTAGTTGC  
TGTCTGAATGATTATTTTTGCAGTCAGAGATCAGGTAGAAGCCGTCTGTTAC  
TGTCTGAATGTTTTTTTTGCGATTGAGATCAGTTAGAAACCGTTTAGTTGCTGTCTGAATG  
> GTTGTAATTT Con:1 reps=8 [3535170,3535544] l-int=375 l-seq = 52  
GTTGTAATTTTCTAGAGTATTGTCACCAATAGCCGCCATTGGAAACACTTTG  
GTTGTAATTTTCTAGAGTTGTGTGCGCAATAGCCGTCATTGGAAACACTTTG  
GTTGTAATTTTCTAGAGTATTGTCGGCAATAGCCGCCGTTGGAAACACATTA  
GTTGTAATTTTCTAGAGTATTGTCGGCAATAGCCGCCATTAGAAACACTTTG  
GTTGTAATTTTCTAGAGTTGTGTGCGCAATAGCCGTCATTGGAAACACATTG  
GTTGTAATTTTCTAGAGTATTGTCGGCAATAGCCGCCGTTGGAAACACATTG  
GTTGTAATTTTCTAGAGTATTGTCGGCAATAGCCGCCATTAGAAACACTTTGGTTGTAATTT  
> TGTGCGCAAT Con:1 reps=4 [3537636,3537802] l-int=167 l-seq = 52  
TGTGCGCAATAGCGCCATTGGAAACACTTAAGTTGTTTATTCTAAGAAATTT  
TGTGCGCAATAGCGGTTATTGGAAACACTTTGATTGTATTTTTTAAGAGTTA

TGTGCGCAATAGCCGCCATTGGAAACACTTAAGTTGTTTATTCCAAGAGTTATGTGCGCAAT  
 > ATAGAAATGT Con:1 reps=7 [3568862,3569184] l-int=323 l-seq = 52  
 ATAGAAATGTGCGCAATAGCTGTTATTGGAAACACTTATGTTGGTTTTTTTGA  
 ATAGAAATGTACCAATAGCTGCCATTGGAAACACTTATGTTGACTTTTTTGG  
 ATAGAAATGTGCGCAATAGCTGCGATTGGAAACACTTATGTTGACTTTTCGA  
 ATAGAAATGTGCGCAATAGCTGCGATTGGAAACACTTATGTTGACTTTTCGA  
 ATAGAAATGTGCGCAAAAGCCGCCATTGGAAACACTCATGTTGGTTTTTTTGA  
 ATAGAAATGTGCGCAAAAGCCACCATTGGGAACACTTATGTTAGTTTTTTTGAATAGAAATGT  
 > ATGAACCTTT Con:1 reps=10 [3645171,3645649] l-int=479 l-seq = 52  
ATGAACCTTTCATAGAGCGCATCGGAGTAAAAAATCGAGCCCCACGTACT  
ATGAACCTTTCATAGAGCGCGTTCGGAGTAAAAAATCGAGCTCCCGCGTACT  
ATGAACCTTTCATAGGGCGCGTTCGGAGTAAAAAATCGAGCCCCACGTACT  
ATGAACCTTTCATAGAGCGCGTTCGGAGTAAAAAATCGAGCTCCCGCGTACC  
ATGAACCTTTCATAGAGCGCGTTCGGAGTAAAAAATCGAGCTCCCGCGTACT  
ATGAACCTTTCATAGAGCGTATCGGAGTAAAAAATCGAGCTCCCGCGTACT  
ATGAACCTTTCATAGAGCGCGTTCGGAGTAAAAAATCGAGCTCCCGCGTACT  
ATGAACCTTTCATAGAGCGCGTTCGGAGTAAAAAATCGAGCTCCCGCGTACT  
ATGAACCTTTCATAGAGCGCGTAGGAGTAAAAAATCGAGCTCCCGCGTACTATGAACCTTT  
 > ATGAGGACAA Con:1 reps=10 [3657440,3657918] l-int=479 l-seq = 52  
 ATGAGGACAAAGTTCGGAGGAAACCCCCAGGAATCTGTCTCATGAAAGGTTC  
 ATGAGGACAAAATCGGAGGAAACCCCCAGGAATCTGTCTCATGAAAGCTT  
 ATGAGGACAAAGTCGGAGGAAAACCCCAGGAATCTGTCTCATGAAAGGCTC  
 ATGAGGACAAAATCGGAGGAAACCCCCAGGAATCTGTCTCATGAAAGGCTC  
 ATGAGGACAAAGTTCGGGGGAAAAGCCCAGGAATCTGTCTCATGAAAGGCTC  
 ATGAGGACAAAATCGGAGGAAAACCCCAGGAATCTGTCTCATGAAAGGCTC  
 ATGAGGACAAAGTTCGGAGGAAACCCCCAGGAATCTGTCTCATGAAAGGCTC  
 ATGAGGACAAAATCGGAGGAAACCCCCAGGAATCTGTCTCATGAAAGCTT  
 ATGAGGACAAAATCGGAGGAAACCCCCAGGAATCTGTCTCATGAAAGCTTATGAGGACAA  
 > ATAGAGCGCG Con:1 reps=5 [3673042,3673468] l-int=427 l-seq = 52  
 ATAGAGCGCGTGTCTGTAAATTTTATTCGAAAAGGCGAACTAAGAACCATTC  
 ATAGAGCGCGAAAGGAGGCTAATTTAAGAATCTGCGTCTATGAGGGTCTT  
 .....  
 ATAGAGCGCGAAAGCAAGCTAATTTAAAGCAATCGCGTCTTATGAAAGGTCTT  
 ATAGAGCGCGTGTCCAGTGATTTATTCGAAAAGGCGTCTTATGAACCATTC  
 ATAGAGCGGAAAGGCTGCTAATTTAAGAATCCGCGTCTATGAGGGGCTT  
 ATAGTACGCGTAGCCTGGGATTTATTCGGAGAAGGCGAACTAAGAACCATTTATAGAGCGCG  
 > AAACGAGGTG Con:1 reps=5 [3674698,3674916] l-int=219 l-seq = 52  
 AAACGAGGTGATATATCAAATTTGGTCAATGGAAGAGGGGGGCACTGCCCA  
 AAACGAGGTGATTTCATCAAATTTGGTCAATGGAAGAGGGGTGCATTGCCCA  
 AAACGAGGTGATTTCATCAAATTTGGTCAATGGAAGAGGGGTGCATTGCCCA  
 AAACGAGGTGATATATCAAATTCGGTCAATGGAAGTAGGTTGCATTGCCCAAAACGAGGTG  
 > GTTTCATAGAG Con:1 reps=11 [3709317,3709951] l-int=635 l-seq = 52  
GTTTCATAGAGCGCGAACATAAGGGAAATTTCCAAGAACGCGCACTATAGAAG  
GTTTCATAGAGCGCGGACTGAAGGGGAAATGTCAAAAACGCGTACTATAAAGA  
GTTTCATAGAGCGCGAACCTGAGGGAGATTTCCAAAAACGCGCACTATAGAAG  
 GTTCAAAGAGCGCGAACCTGAGGGGAACTCCAAAAACGCGCACTATAAAGA  
GTTTCATAGAGCGCGAACCTTGAGAGAAAACTCTAAAACGCGCACTAAAGAAG  
GTTTCATAGAGCGCGAACCTGAGGGGAAATTTCCAAGAACGCGCACTAAAGAAG  
GTTTCATAGAGCGCGGACTGAAGGGGAAATGTCAAAAACGCGCACTATAGAGG  
GTTTCATAGAGCGCGGACTGAAGGGGAAATGCCAAAACGCGTACTATAAAGA  
GTTTCATAGAGCGTGGACTGAAGGGGAAATGCCAAAACGCGTACTATAAAGA  
GTTTCATAGAGCGCGAACCTGAGGGAGATTTCCAAAAACGCGCACTATAGAAG  
 GTTCAAAGAGCGCGAACATGAGGGGAACTCCAAAAACGAGCACTATAAAGAGTTCATAGAG  
 > GGTAACGTAG Con:1 reps=9 [3718417,3718842] l-int=426 l-seq = 52  
 GGTAACGTAGAGGGTGTCTAGGTGCCCCGAACGGCCGAAAAAAGAAGAGGAG  
 GGTAACGTAGAGGGTGTCTAGGTGCCCCGAACGGCCGAAGAAAAGAAGAGGAG  
 GGTAACGTAGAAGCAGTCTACGTGCCCCGAACGGTCGAAAAAAAGAAGAGGAG  
 GGTAACGTAGAGGGTGTCTAGGTGCCCCGAACGGCCGAAAAAAAGAAGAGGAG  
 GGTAACGTAGAAGCAGTCTACGTGTCCGAACGGTCGAAAAAAAGAAGAGGAG  
 GGTAACGTAGAAGCAGTCTACGTGCCCCGAACGGTCGAAGAAAAGAAGAGGAG  
 GGTAACGTAGAGGGTGTCTAGGTGTCCGAACGGTCGAAGAAAAGATGAGTATAGGTAACGTAG  
 > ATTGGAAACA Con:1 reps=4 [3723004,3723222] l-int=219 l-seq = 52  
 ATTGGAAACACTTTTGAGAAATTTTGTTAGGGGAATTGTGCGCAATAAGCTCT

TTTGAAACACTTTAGTTGTTTTAGCTAAGGGAAATGTCGCCAATAGGCTGT  
ATTGAAACACTTTAGTTGTTTTAGCTAAGGGAAATGTCAGCAATAAGCGGT  
ATTGAAACAGTTTAGTAGTTTTTTGTTAAGGGAAATATCGCCAATAGGCATTATTGAAACA  
> GCGGTAAAAA Con:1 reps=12 [3747415,3748272] l-int=858 l-seq = 53  
GCGGTAAAAAATGAAGGGTTGATTTTGCCTGAGAGGCTGCGAGGAAGGGGGCTA  
GCGGTAAAAAATAAAGGGTTGATTCTGCCTGAGAGGCTGAGAGGAAGGGGGTG  
GCGGTAAAAAATGAAGGGTTGATTTTGCCTGAGAGGCTGAGAGGAAGGGGGCTA  
TCGGTAAAAAATAAAGGGTTGATTCTGCCCCTGAAGCTGAGAGGAAGGAGGCTG  
GCGGTAAAAAATAAAGGGTTGATTCTGCCCAGGAGCTGCGAGGAAGGGGGG  
AGCGTAAAAAATAAAGGGTTGATTCTGCCCAGGAGCTGCTTGAAGGAGGCTG  
GCGGTAAAATGAAGGGCTGATTTTGCCCAGGAGCTGCGAGGAAGGGTGTG  
GCGGTAAAAATGAAGGGCTAATTTTGCCCAGGAGCTGCTTGGTAGGGTGCTG  
GCGGTAAAAAATGAAAGGTATTTTGCCCCTGAAGCTGCTTGGCCGGTGCTG  
GCGGTAAAAAATGAAGGGTTGATTCTGCCCCTGAAGCTGAGAGGAAGGGGGCTA  
TCGGTAAAAAATAAAGGGTTGATTTTGCCCAGGAAGGTGCGGTAAAGGGGGCTC  
GCGGTAAAAAGAACAGAGCTCTATTGCCCGAAAAGGTACCCAAGCAGTCCTCA  
ACGGTAAAAAGAACCGGTATCTATTGCCCAGAGGACCCAAGCAGTCCCCT  
GCGGTAAAAAGAACCGGTATCTATTGCCCAGAGGACCCAAGCAGTCCCCC  
GCGGTAAAAAGAACAGAGCTCTATTGCCCAGAGGACCCAAGCAGTCCCCC  
GCGGTAAAAAGAACTGAGTTCTATTGCCCAGTACCCAAGCAGTCTCCAGCGTAAAAA  
> TGTCTTTAAT Con:1 reps=8 [3763475,3763900] l-int=426 l-seq = 52  
TGTCTTTAATAAGCCCTATTGAGGACAAACCCGGCCTAGAAACCTATGAAAA  
TGTCTTTAATAAGGCTTCTAGAAGACAAACCCGGCCTAGAAACCTATGAAAA  
TGTCTTTAATAAGGCTTCTAGAAGACAAACCCGGCCTAGGAACCTATGAAAA  
TGTCTTTAATAAGGCTTCTAGAAGACAAACCCGGCCTAGGAACCTATGAAAC  
TGTCTTTAATAAGGCTTCTAGAAGACAAACCCGGCCTAGGAACCTATGAAAC  
TGTCTTTAATAAGGCTTCTAGAAGACAAACCCGGCCTAGGAACCTATGAAAA  
TGTCTTTAATAAGGCTTCTAGAAGACAAACCCAGACCAGAAACCATATAATT  
TGTCTTTAACAACAAATGAAAGGACCAATCTAACCTCCCCCTAAAAATGTCTTTAAT  
> GTCGCATAGA Con:1 reps=7 [3775783,3776105] l-int=323 l-seq = 52  
GTCGCATAGAAGGGGTATACGAGCCCGGGCGCGGAAAAAATGGAGGTGCCG  
GTCGCATAGAAGGGGTATACGCGCCCGGGCGCGGAAGAAATGGAGGTGCCG  
GTCGCATAGAAGGGGTATAGGCGACCGGGCGCGGGAAAAGTGGAGGAGCCG  
GTCGCATAGAAGGGGTATAGACGACCGAACCGCAGAAAAAATGGAGGTGCCA  
GTCGCATAGAAGGGGTATACGCGCCCGAGCGCGGAAGAGAAGAGTTGTCG  
GTCGCATAGAAGGGGTATACGCGCCCGAGCGCGGGAAAAAGAAGAAGCGTCGGTCGCATAGA  
> ATGAGAACAG Con:1 reps=4 [3779055,3779221] l-int=167 l-seq = 52  
ATGAGAACAGAGAGCTGTGGGAGCGTGCCGTCTTGTCTCATAAAGTGCCC  
ATGAGAACAGGAAAACCAAGCAACTGCCCTAATCTTGTCTCATAAAGCGTTC  
ATGAGAACAGAAAGCTGAGAAAAAGTGCCGCCCTTGTCTCATAAAGCGCCATGAGAACAG  
> TTGGAACAC Con:1 reps=6 [3785428,3785698] l-int=271 l-seq = 52  
TTGGAACACACTTTTGTGCTTTTGCTAAGAGAAATGTCGCCAACAGGCCCA  
TTGGAACACACTTTTGTGCTTTTGCTAAGAGAAATGTCGCCAACAGGCCCA  
TTGGAACACACTTTTGTGCTTTTGCTAAGAGAAATGTCGCCAATAGACCCG  
TTGGAACACACTTTTGTGCTTGTACTAAGAGAAATGTCGTCAATAGGCCCTA  
TTGGAACACACTTAAGTTGTATTTTAAAGAGAAATGTCGGCAATGGGTCTATTGGAAACAC  
> TTTTCGGAAAA Con:1 reps=7 [3807647,3808021] l-int=375 l-seq = 52  
TTTTCGGAAAAGGCGTTTATTGAGGGGGTCATTAAGCACATGAGGCTGAGTTT  
TTTTCGGAAAAGGTGTTTCATAGAAGAGGTCAATGAACACATGAGGCTAAGTTT  
TTTTCGGAAAAAGTGTTTCATAGAAGAGGTCAATGAGCACATGGCTTTGAGTTT  
TTTTCGGAAAAAGTGTTTCATAGAAGAGGTCAATGAGCACATGAGGCTGAATTT  
TTTCAGAAAAGGTGTTTCATAGAAGAGGCCAATGAGCAAATGTGGCTAAGTTT  
TTTTCGGAAAAGGTGTTTCATAGAAGAGGTCAATGAACACATGAGGCTGAGTTT  
TTTTCGGAAAAAGTGTTTCATAGAAGAGGTCAATGAGCACACGGCTCTGAGTTTTTTTCGAAAA  
> TTGGAACAC Con:1 reps=15 [3814968,3815757] l-int=790 l-seq = 52  
TTGGAACACACTTTTTCGTTTGTGAGAGATTGTTTCCAATAGGTGCGA  
TTGGAACACACTTTACTCGTATTTTCGCAGAGTTTGTTCCTAATAGGCGTGA  
TTGGAACACACTTTACTCGTATTTTCATTGAGATTGTTTCCAATAGATGCGA  
TTGGAACACACTTTACTAGTATTTTCGCAGAGATTGTTTCCAATAGGTGCGA  
TTGGAACACACTTTACTCTATTTTTCATATAGATTGTTTCCAATAGATGCGA  
TTGGAACACACTTTACTCGTATTTTCACAGAGTTTGTTCCTAATAGGTGCGA  
TTGGAACACACTTTACTCGTATTTTCGAGAGATTGTTTCCAATAGTTGTGA  
TTGGAACACACTTTACTCGTATTTTCGCAGAGTTTGTTCCTAATAGGCGTGA  
TTGGAACACACTTTACTCTATTTTTCATATAGATTGTTTCCAATAGATGCGA  
TTGGAACACACTTTACTCGTATTTTCACAGAGTTTGTTCCTAATAGGTGCGA

TTGGAAACACTTTACTCGTATTTTCGCAGAGAGTTTGTTTTCGAATAGGCGGTGA  
TTGGAAACACTTTACTCGTATTTTCATTGAGATTGTGTTTCCAATAGATGCGA  
TTGGAAACACTTTACTAGTATTTTCGCAGAGATTGTGTTTCCAATAGGTGTGA  
TTGGAAACACTTTACTCTATTTTCATAGAGATTGTGTTTCTAATAGGTCCGA  
TTGGAAACACTTTACTCGTATTTTCGCGGAGATTGTGTTTCCAATAGGTAGGATTGGAAACAC  
> TATTGCCCCG Con:1 reps=13 [3822748,3823390] l-int=643 l-seq = 53  
TATTGCCCCGATTGGGGTGTCCAAGGGGTGAAAAATGTTAAAGAAAGTGGTTTC  
TATTGCCCCGAAATGGGTTTCGAAGAGGTCTAAGCGGTAAAAAGAACTCGCCTC  
TATTGCCCCGATTGGGTGTCCAAGGGGTGCAAATGGTAAAAAGAAAAAGCTTTC  
TATTGCCCCGAAAAAGGTCCGAAGAGGTCTTAACGGTAAAAAGAAACAGCTTC  
TATTGCCCCGATTGGGTGTCCAAGAGGTGCAAATGGTAAAAAGAAAAAGGTTC  
TATTGCCCCGAAATGGGTCCGAAGAGGGCTAATGGTAAAAAGAACACGCTTC  
TATTGCCCCGATTGGTGTGTCCAAGGGGTGCAATGGTAAAAAGAAAAAGGTTC  
TATTGCCCCGAAATGGGTCCGAAGAGGGCTAATGGTAATAAGAACACGCTTC  
TATTGCCCCGATTGTGGTGTCCAAGGGGTGTAATGGTAAAAAGAAAGTGGTTTT  
TATTGCCCCGAGCAAGGTCTTGAGGGGGGCAAACGGTAAAAAGAAAAAGGTTC  
TATTGCCCAGAAAAAGGTCCGAAGAGGTCCAAACGGTAAAAAGAAACACGCTTC  
TATTGCCCCGATTGGGTGTCCAAGGGGGTGCATATGGTAAAAAGAACACGCTTCTATTGCCCCG  
> TAGGCGACCG Con:1 reps=7 [3843104,3843426] l-int=323 l-seq = 52  
TAGGCGACCGAGAGAGTGAAGAAAAAGAGATTACGGGTAGCGTAGAAGGGTTA  
TAGGCGACCGAGGGAGCGGAAAAAGAGTTTACGGGTAGAGTAGAAGGGATA  
TAGGCGACCGAGAGAGTGAAGAAAAAGAGATTGCGGGTAGCGTAGAAGGGTTA  
TAGGCGACCGAGAGAGCGGAAAAAGAGATTGCGGGTAGCGTAGAAGGGTTA  
TAGGCGACCGAGGGAGCGGAAAAAGAGATTGCGGGTAGCGTAGAAGGGCTA  
TAGGCGACCGAGAGAGCGGAAAAAGGAGTCACGGGTAGCGTAGAAGGGCTTTAGGCGACCG  
> CTATTGGAAA Con:1 reps=5 [3851718,3851935] l-int=218 l-seq = 52  
CTATTGGAAACATTTTGTCCAATTTTAACCTAAGTCTTGTGTCCTAATACCGC  
CTATTGGAAACACTTTGTCCAATTTTAACCTAAGTATTGTGTCCTAATACCGC  
CTATTGGAAACACTTTGTCCAATTTTAACCTAAGTATTGTGTCCTAATAGCGCTATTGGAAA  
> ACTATGGGAG Con:1 reps=14 [3869085,3869771] l-int=687 l-seq = 52  
ACTATGGGAGGTTTCATAGAGCGCGAAATTAGGAAAAAGGAAAGACTCCACGC  
ACTATGGGAGGTTTCATAGAGCGCGAAATTGTGAAAAAGGAAAGACTCCGCGC  
ACTATGGGAGGGTCATAGAGCGTGAAATTAGGAAAAAGAAAAAGATTCCGCGT  
ACTATGGGAGGTTTCATAGAGCGTGAAATTAGGAAAAAGAAAAAGATTCCGCGT  
ACTATGGGAGGTTTCATAGAGCGTGAAATTAGGAAAAAGAAAAAGATTCCGCGT  
ACTATGGGAGGTTTCATAGAGCGCGAAATTAGGAAAAAGGAAAGACTCCACGC  
ACTATGGGAGGTTTCATAGAGCGCGAAATTGTGAAAAAGGAAAGACTCCCGC  
ACTATGGGAGGTTTCATAGAGCGCGAAATTAGGAAAAAGGAAAGACTCCGCGT  
ACTATGGGAGGTTTCATCGAGCGAGAAATAAGGAAAAAGGAAAGACTCCGCGC  
ACTATGGGAGGTTTCATCGAGCGAGAAATAAGGAAAAAGGAAAGACTCCGCGC  
ACTATGGGAGGTTTCATAAAGCGTGAAATTAGGAAAAAGAAAAAGATTCCGCGT  
ACTATGGGAGGTTTCATAAAGCGTGAAATTAGGAAAAAGAAAAAGATTCCGCGTACTATGGGAG  
> CAATGAAAC Con:1 reps=5 [3869826,3870044] l-int=219 l-seq = 52  
CAATGAAACACTAAACCTAGAAAAAGAGTAAAAAGAGCGCATAGGGGGAGT  
CAATGAAACACGAAACTCTAGAAAAAGAGTAAAAAGTGCACATAGAGGGTCT  
CAATGAAACACGTAGCCCCAGAAAAATAACAAATACATGCGCATTGAAGGGTT  
CAATGAAACACGAAACTCCAAGAAAAAAGCAAGTTAGTGCTATAGAAAGGTTCAATGAAACAC  
> TATTGCCCCG Con:1 reps=8 [3880946,3881427] l-int=482 l-seq = 52  
TATTGCCCCGAGGAGGAGCGAGAAAGGAGGTAAAGCGGTAAAGATGAGGGGGTGA  
TATTGCCCCGAGGAGGTGCGGGAAGAGAAGTCAGCGGTAAAGATGAGAGGTTGA  
TATTGCCCCGAGGAGACGAGGAAGGGAGGTAAAGCGGTAAAGATGAGAGGTTGA  
TATTGCCCCGAAGAGAAAGAAAAAATTAATCCCGCGGTAAAAAGACCAGGCTTC  
TATTGCCCAGAAAAAGGAAAAAGTAAGTCCCGCGGTAAAAAGAAAGTGTCTC  
TATTGCCCAAAGAGAAAGAAAAAATTAATCCCGCGGTAAAAAGACCAGGCTTC  
TATTGCCCGAATAGAGGAAAAAGTAAGTCCCGCGGTAAAAAGAAAGTGTCTC  
TATTGCCCGAAGAGAAAGAAAAAATTAATCCCGCGGTAAAAAGACCAGGTTTC  
TATTGCCCAAAGGCGCGAAAAAGTAAGTCCCGCGGTAAAAAGACCAGGCTTCTATTGCCCCG  
> TGGAAACAAA Con:1 reps=11 [3938063,3939318] l-int=1256 l-seq = 52  
.....  
TGGAAACAAAACACTCACGAAGAAAGCGGCAGAAATGTTTCCAATGAGGGCTAT  
TGGAAACAAAACACTCACGAAGAAAGCGGGAGAAATGTTTCCAATGAAAGGCTAT  
TGGAAACAAAATCTCACGAAGAAAGCGGGAGAAATGTTTCCAATGAAAGGCTAT  
TGGAAACAAAACACTCACGAAGAAAGCGGCAGAAATGTTTCCAATGAGGGCTAT



TGGAAACAAAACCTCAGAAAGAAAGCGGGAGAAATGTTTCAATGAAGGCTAT  
TGGAAACAAAATCTCACGAAGAAAGCGGGAGAAATGTTTCCAATAAGGGCTAT  
TGGAAACAAAATCTCACGAAGAAAGCGGGAGAAATGTTTCCAATGAGGGCTAT  
TGGAAACAAAACCTCACGAAAAAAGCGGGAGAAATGATTCCAATAAGGGCTAT  
TGGAAACAAAACCTCACGAAGAAAGCGGGAGAAATGATTCCAATGAGGGCTATTGGAAACAAA  
> AGCGTTTATG Con:1 reps=12 [4057906,4058541] l-int=636 l-seq = 52  
AGCGTTTATGAGAACCGCAAGTGAATGATTTTGGTTTGTCCAGTCCCTCATGA  
AGGGGTTATTGGAACAAAGAGCCGAAGATTTGAGTCCGTAAGTGTCCCTCATGA  
AGCGTTTATGAGAACAGAGAGCTAATGATTTGGGCCGAAACTGTCCCTCATGA  
AGCGTTTATGAGAACAGAGAGCTAATGATTTGAGTCAGAACTGTCCCTCATGA  
AGCGTTTATGAGAACAGAGAGCTAATGATTTGAGTCAGAACTGTCCCTCATGA  
AGCGTTTATGAGAACAGAGAGCGGAGGATTTGGGTGCGAACTGTCCCTCATGA  
AGCGTTTATGGAACCGCAAGCGAAAGATTTGGGTCAAAAACCTGTCCCTCATGA  
AGCGTTTATGAGAACAGAGAGCTAATGATTTGGGCCGAAACTGTCCCTCATGA  
AGCGTTTATGAGAACAGAGAGCTAATGATTTGGGCCGAAACTGTCCCCATGA  
AGCGTTTATGAGAACAGAGAGCTAATGATTTGAGTCAGAACTGTCCCTCATGA  
AGCGTTTATGAGAACAGAGAGCTAATGATTTGAGTCAGAACTGTCCCTCATGA  
AGCGTTTATGAGAACAGAGAGCTAAAAGATTTGGGTGCGAACTGTCCCTCATGAAGCGTTTATG  
> AAGAAGTGT Con:1 reps=6 [4170771,4171041] l-int=271 l-seq = 52  
AAGAAGTGTCCATAGAGGTCTCAATGAACACAAAATTTGTAAGGAGAG  
AAGAAGTGTCCATAGAGGTCTCAGTGAACACGAAGTCGTGTAAGGCGG  
AAGAAGTGTCCATAGAGATCTCAATGAACACGAAGCCGTGAAATAAGCGG  
AAGAAGTGTCCATAGAGGTCTCAATGAACACGAAATCGTGTAAGGAGAG  
AAGAAGTGTCCATAGAGGTATTCAATGAACACGAAATCGTGTAAGGCGGAAGTGTCT  
> AAAAAAGAGA Con:1 reps=16 [4191741,4192532] l-int=792 l-seq = 52  
AAAAAAGAGAGTCCAGGGTCACATAAAAGCTTCTACGCGACCGGGCACATG  
AAAAAAGAGAGCGCCGAGTAGCATAAAGAGCGTCTATGCGACCGAGCCAGAG  
AAAAAAGAGAGCGCCGGTAGAGTAGAGAGCGTCTATGCGACTTAGCCAGAG  
AAAAAAGAGAGCGCCGAGTAGCATAAAGAGCATCTATGCGACCGGACAGAG  
AAAAAAGAGAGAGCGCCGGTAGAATATAGAGAGCGTTTATGCGACCAAGCCCAAG  
AAAAAAGAGAGCGCGTGGTAGAATAGAGAACGTCTATGCCACCGAGTCCAAG  
AAAAAAGAGAGAGCGCCGGTAGAATAGAGAACGTCTATGCGACCGAGTCCAAG  
AAAAAAGAGAGAGCGCCGAGTAGCATAAAGAGCATCTATGCGACCGAGCCAGAG  
AAAAAAGAGAGAGCGCGTGGTAGAATAGAGAGCGTCTATGCGACCAAGCCCAAG  
AAAAAAGAGAGAGCGCCGAGTAGCATAAAGAGCATCTATGCGACCGAGCCAGAG  
AAAAAAGAGAGAGCGCCGAGTAGCATAAAGAGCATCTATGCGACCGAGCCAGAG  
AAAAAAGAGAGAGCGCCGGTAGCATAAAGAGTATCTATGCGACCGAGTACGAG  
AAAAAAGAGAGCGCCGGTAGAGTAGAGAGCATCTATGCGACCGAGCCAGAG  
AAAAAAGAGAGCGCCGGTAGAGTATAGAGCGTCTATGCGACCGAGCCAGAG  
AAAAAAGAGAGAGCGCCGGTAGAATAGAGAGCATCTATGCGACCGAGCCAGAGTAAGAGAG  
> GCGACAAAAC Con:1 reps=7 [4300776,4301098] l-int=323 l-seq = 52  
GCGACAAAACACTGTTTGTAAGGCTAAGTGTCTCAATGAAGGCTATTA  
GCGACAAAACCTCGAGTAAGGATAAGGCGAAGTGTATCCAATGAGGACTATTG  
GCGACAAAACCTGTTTGTAAGGCGAAGTGTATCCAATGAAGGCTGTTG  
GCGACAAAACCTGTTTGTAAGGCGAAGTGTATCCAATGAAGGCTATTG  
GCGACAAAACCTGTTTGTAAGGCGAAGTGTATCCAATGAAGGCTATTG  
GCGACAAAACCTGTTTGTAAGGCGAAGTGTATCCAATCGTGGCTATAG  
GCGACAAAACCTCGAGGAGCAAGAGAGTAAAGTGTATCCAATGAGGGCTATAGGCGACAAAAC  
> TCAATGAACA Con:1 reps=6 [4719016,4719338] l-int=323 l-seq = 52  
TCAATGAACATGATTTGGTAAAATTTCCGGTTGGAAGTGTTTCATAGAAAGGT  
TCAATGAACATGAATCGGCAAAACCTTTAGGTGGGAAGTGTTTCATAGAGAGGT  
TCAATTAACACGAATCGTCAAAATTTTAGGTGGGAAGTGTTTCATAGAGAGGT  
TCAATGAACACGAATCAGCAAAATTTTCAGTCAAGAAGTGTTTCGTAGAGAGGT  
TCAATGAACACGAATCAGCAAAATTTTCGGTCAAGAAGTGTTTCGTAGAGAGGT  
TCAATGAACACAAATTTGGCAAAATTTAATTCAGGAAGTGTCATAGAGGAAGTCAATGAACA  
> TCTACGTGAC Con:1 reps=6 [4729327,4729597] l-int=271 l-seq = 52  
TCTACGTGACCAAAACAACCTCTTTTCTTCCGTTACGGTCACGTAGAACCTC  
TCTACGTGACCAAAACAACGCTTTTCTTCCGCTACGGTCACGTAGAACCTC  
TCTACGTGACCGAAACAACCTCTTTTCTTCCGTTACGGTCACGTAGAACCTC  
TCTACGTGACCGAACAGCCCTTTTCTTCCGCTAGGGTCACGTAGAACCTC  
TCTACGTGACCGGACAACCCCTTTTCTTCCGCTAGGGTCGCGTAGAACCTGTCTACGTGAC  
> ATTGCCCAAA Con:1 reps=15 [4951452,4952190] l-int=739 l-seq = 52  
ATTGCCCAAAATCGGTGATTAGATGGAAATTGGTCAATGGACGGGGCTGTC  
ATTGCCCAAAATCGGTGATTAGATGGAAATTGGTCAATGGACGGGGCTGTC  
ATTGCCCAAAATCGGTGATTAGATGGAAATTGGTCAATGGACGGGGCTGTC  
ATTGCCCAAAATCGGTGATTAGATGGAAATTGGTCAATGGATGGGGCTTGC

ATTGCCCAAAATCGGTGATTAGATGGAAATTGGTCAATGGCCGGGGCCTGC  
 ATTGCCCAAAATCGGTGATTAGATGGAAATTGGTCAATGGCCGGGGCCTGC  
 ATTGCCCAAAATCGGTGATTAGATGGAAATTGGTCAATGGACGAGGCCTGC  
 ATTGCCCAAAATCGGTGATTAGATGGAAATTAGTCAATGGCCGGGGCTTGC  
 ATTGCCCAAAATCGGTGATTAGATGGAAATTGGTCAATGGACGGGGCTTGC  
 ATTGCCCAAAATCGATGATTAGATGGAAATTAGTCAATGGCCGGGGCTTGC  
 ATTGCCCAAAATCGGTGATTAGATGGAAATTAGTCAATGGATGGGGCTTGC  
 ATTGCCCAAAATCGGTGATTAGATGGAAATTGGTCAATGGACGGGGCTTGC  
 ATTGCCCAAAATCGGTGATTAGATGGAAATTAGTCAATGGATGGGGCTTGC  
 ATTGCCCAAAAGTCGGTGATTAGATGGAAATTGGTCAATGGACGAGGCTTGCAATTGCCCAAA  
 > GTCGCATAGA Con:1 reps=8 [4975737,4976319] l-int=583 l-seq = 52  
 GTCGCATAGAAGGTGAATACGCGATTGAAGCGGC**GAAAA**AATCGTGAGCGCG  
 GTCGCGTAGAAGGTGTATACGCGACTGAAGAGCCG**GAAAA**ATTAGGAGCTGG  
 GTCGCATAGAAGGTGTATATACGACCGAAGCGGC**GAAAA**AATCGTTAGCTGG  
 GTCGTATAGAAGGTGTATACTCGACCGAAGAGCCG**GAAAA**ATTAGGAGCTCG  
 GTCGCATAGAAGGCGCATACGCAACCGAAGCGGC**GAAAA**ATCGGGAACCTCG  
 GTCGCATAGAAGGCGCATACGCGACCGAAGCGGC**GAAAA**AATCGTGCCCCCG  
 GTCGCGTAGAAGGCGTATATACGACCGAAGCGGC**GAAAA**AATCGTGAGCTCG  
 GTCGCATAGAAGGCACATATGCTACCGAAGCGGCAAAAAACCGTTCACTCA  
 GTCGAATAGAAGGCGTATACGCGACTGAAGCGGCAAAAAACCGTGACGCG  
 GTCGCATAGAAGGCGCATACGCGACTGAAGCGGCAAAAAACCGTGCCCGGG  
 GTCGCATAGAAGGTGAATACGCGACTGAAGCGGC**GAAAA**AAATCGTGCCCCATGTCGCATAGA  
 > **GAAAA**AGAA Con:1 reps=5 [5059185,5059455] l-int=271 l-seq = 52  
**GAAAA**AGAAGAGAGGCCGGTTCGAATAGAAAGAGTATATGCGACCGAGCGTC  
**GAAAA**AGAAGGTCCACCGGTTCGCATAGAAAGAGTATATGCGACCGAGCGCC  
**GAAAA**AGAGGAGCCGTCGGTTCGCATAGAAAGGTATATGCGACTGAGCGGC  
**GAAAA**AGAAGAGAGGCCGGTTCGAATAGAAAGGCATATGCGACTGAGCGGC  
**GAAAA**AGAAGAGTAATTGGTTCGCATAGAAAGAGTATACGCGACTGAGCGGT**GAAAA**AGAA  
 > TCTACGTGCC Con:1 reps=6 [5285435,5285705] l-int=271 l-seq = 52  
 TCTACGTGCCCCAAGTTCAATAAATTAGTGAGTTTCGGTCACGTAGAGCCGT  
 TCTACGTGCCCCAAGTTCAATAAATTAGTGAGTTTCGGTCACGTAGACCTCT  
 TCTACGTGCCCCAAGTCCAATAAATTAGTGGTTTCGGTTCGCGTAGAGCCCA  
 TCTACGTGCCCCAATCCAATAAATTAGTAGTTTCGGTTCGCGTAGAGCCCA  
 TCTACGTGCCCCAAGTTCAATAAATTAGTAGTTTCGGTTCGTGTAGAGATCTTCTACGTGCC  
 > TTGACCTTTT Con:1 reps=8 [5395730,5396209] l-int=480 l-seq = 52  
 TTGACCT**TTTTC**TTT**GAAAA**ACAAATAGTTTAGGGCA**ATGAA**CATGGCTCCCA  
 TTGACCT**TTTTC**TTTTAAATCAATTAGTTTAGGCAATGCACATGGCTTCCA  
 TTGACCT**TTTTC**TTT**GAAAA**ACAAATAGTTTAGGGCAATGCGCGGGGCTCCCA  
 TTGACCT**TTTTC**TTTTAAATATCAATTAGTTTAGGTAATGCACATGGCTTCCA  
 TTGACCT**TTTTC**TTTCAAAATCAACTAATTTGGGCA**ATGAA**CAAAGCTTCCA  
 TTGACCGTTTCT**TTTCAT**AATCAATAGTTTAGGGCA**ATGAA**CAGGGCTTCCA  
 TTGACCGTTTCTTTAAATATCAATTAGTTTAGGCAATGGACATGGTTCCCA  
 TTGACCT**TTTTC**TTTTAAATATCAATTAGTTTAGGCAATGGACATGGCTTCCA  
 TTGACCT**TTTTC**TATTTAAACTATCTAGTTTAGGGCAATGGACATGGCTTCTTTGACCTTTT  
 > CTTCAATGTG Con:1 reps=5 [5398707,5398978] l-int=272 l-seq = 52  
 CTTCAATGTGCACTTCTTCGATGA**TTTTC**CTTGCTTCCGTG**TTTCAT**TGGGGG  
 CTTCAATGTGCACTTCTTCGATGA**TTTTC**CTTGCTTCCGTG**TTTCAT**TGAGCC  
 CTTCAATGTGTACTTCTTCGATGA**TTTTC**CTTGCTTCCGTG**TTTCAT**TGGGGG  
 CTTCAATGTGCACCTCTTGTGGATTTCTCTTGCTCTCGAG**TTTCAT**TGAATC  
 CTTCAATGCGCACTTATTCGGTAATTTCTCTTGCCCTCGTG**TTTCAT**TGAACCCCTTCAATGTG  
 > TTGACCAAAA Con:1 reps=11 [5450221,5450858] l-int=638 l-seq = 52  
 TTGACCAAAAAGAGGATAATCCTCAAAAAGGTCAATGCGAGCAGGGTCCA  
 TTGACCAAAAAGAGAGGAAACCTTCAAAAAGGTCAATGCAAGCAGGTTCTCT  
 TTGACCAAAAAGAGAGGAAACCTTCAAAAAGGTCAATGCAAGCAGGCTCCT  
 TTGACCAAAAAGTGA**GAAAA**CCCTTCAAAAAGGTCAATGCAAGCAGGCTCCA  
 TTTACCAAAAAGAGAGGAAACCTTCAAAAAGGTCAATGCAAGCAGGTTCCA  
 TTGACCAAAAAGAGAGGAAACCTTCAAAAAGGTCAATGCAAGCAGGTTCTCT  
 TTGACCAAAAAGAGAGGAAACCTTCAAAAAGGTCAATGCAAGCAGGCTCCT  
 TTGACCAAAAAGTGA**GAAAA**CCCTTCAA**GAAAA**GGTCAATGCAAGCAGGCTCCA  
 TTTACCAAAAAGAGAGGAAACCTTCAAAAAGGTCAATGCAAGCAGGTTCCA  
 TTGACCAAAAAGAGAGGAAACCTTCAAAAAGGTCAATGCAAGCAGGTTCTCT  
 TTGACCAAAAAGTGA**GAAAA**CCCTTCAAAAAGGTTAATGCAAGCAGGTTCCA  
 TTGACCAAAAAGTGAGGAAACCCAGTCAAAAATGGGTAAATGCGAACAGCTTCTCTTTGACCAAAA  
 > TGTCC**TTTCAT** Con:1 reps=10 [5707911,5708389] l-int=479 l-seq = 52  
 TGTCC**TTTCAT**AAGGTTG**ATGAAG**ACCATTTTGG**ATGAAAA**GCCGAAGTGAAA

TGTCCTTCATAAGGGTGATGAAGACCATTTTGGATGAAAAGCCAAAGAGAAA  
TGTCCTTCATAAGGTGTATGAAGACCATTTTGGATGAAAAGCCTAAGAGAAT  
TGTCCTTCATAAGGGTGATGAAGACCATTTTGGATGAAATGCCGAAGAGAAA  
TGTCCTTCATAAGGGTGATGAAGACCATTTTGGATAAAAAGCCAAAGAGAAA  
TGTCCTTCATAAGGTGTATGAAGACCATTTTGGATGAAAAGCCAAAGAGAAA  
TGTCCTTCATAAGGTGTATGAAGACCATTTTGGATGAAATGCCGAAGAGAAA  
TGTCCTTCATAAAGGTGATGAAGACCATTTTGGATGAAAAGCCAAAGAGATA  
TGTCCTTCATAAGGTGTATGAAGACCATTTTGAACGAAAAGCCGAAGTGAAATGTCCTTCAT

**B.cellulosilyticus (NC 014829). All tandem repeats l-seq=52**

Total 54 tandem repeats. Only 31 have one or more of the following signals or its reverse:

**GGTCATCAT**, **CAATGCT**, **ACGAAGG**, **ATGACAC**

```
> GTGTATCATA Con:1 reps=6 [18432,18858] l-int=427 l-seq = 52
GTGTATCATAACGAGGCCAATGATACGCGAGAAGGTAGTGGGAACGAGATAAA
GTGTATCATAACGAGACCAATGACACGCGAGAAAGAAGTGGGAATGAAATAAA
GTGTGTCATACGAAGGCAATGACGCATATAAAAGTGGGAGGAACGGAATAAG
GTGTATCATAACGAGGCCAATGACACGCGAGAAAGTAGTAGGAACGAGATAAA
GTGTGTCATAGAAGTGCAATGACACGTGAGAATTTAGGTGGAAACGGATAAA
GTGTATCATAACGAAGGCAATGACACATATAAAAGTGGGAGGAACGGAACAAA
GTGTATCATAACGAGGCCAATGACACGCGAGAAAGTAGTGAGAATGAAATAAA
GTGTGTCATACGAGAGTAATGAAACATGAAATCTTAAGTAAAATAAAATAAGGTGTATCATA
> CACTCAACGA Con:1 reps=10 [18889,19522] l-int=634 l-seq = 52
CACTCAACGAAGGTCATCATAATCAAGCAATGCTACCCCAAAACCAACCCCG
CACTCAACGAAGGTAATCATAATCAAGCAATGCTACCCCAAAACCAACCCCG
CACTCAACGAAGGTAATCATAGTAAGCCAATGCTACCCCAAAACCAACCCCG
CACTCAACGAAGGTAATCATAGTAAGCCAATGCTACCCCAAAACCAACCCG
CACTCAACGAAGGTAATCATAGTAAGCCAATGCTACCCCAAAACCAAACT
CACCTAACGAAGGTAATCATAGGCGGCCAATGCTGCCCCAAAAGCCAACTCA
CACTCAACGAAGGTAATCATAGTAAGCCAATGCTACCCCAAAACCAACCCG
CACCACAACGAAGGTAATCATAAGCAAGCAATACTACCCCAAAACTAAACCAC
CACTCAACGAAGGTAATCATAGTAAGCCAATGCCACCCCAAAACCAACCCG
CACTCAACGAAGGTCACCAAAAGCAAGCAATGCTGCCCCAAAACCAACCCAG
CACTCAACGAAGGTCATCATACCCAAGCATGCCGCCCCCAAAACCAATCCTCACTCAACGA
> AATAAAGTGT Con:1 reps=7 [43977,44455] l-int=479 l-seq = 52
AATAAAGTGTATACAAAGTGAATGACGCAAGAAAAAGTGGGAGGAACGG
AATAAGGTGTATCATAACGAGACCAATGACACGCGAGAAGGTAGTGGGAACGA
GATAAAGTGTGTCATAGAAGTGCAATGACACGTGAAAAAGTATGTGGAAACG
AATAAAGTGTATCATACGAAGGCAATGACGCATAAGAAAGTGGGAGGAACGG
AATAAGGTGTATCATAACGAGGCCAATGACACGCGAGAAGGTAGTGGGAACGA
AATAAAGTGTGTCATAGAAGTGCAATGACACGTGAAAAAGTATGTGGAAACG
AATAAAGTGTATCATAACGAAGGCAATGATGCATAAGAAAGTGGGAGGAACGA
AATAAAGTGTGTCATATGAGGCAATGACACGCGAGAAAGAAGTGGGAACGG
AATAAAGTGTATCATAACGAAGCCAATGACACGCGAGAAAGTAGTGGGAATGAAATAAAGTGT
> CAATGCTACC Con:1 reps=5 [44519,44789] l-int=271 l-seq = 52
CAATGCTACCCTAAAAGCTAATCCTCACTCATCGAAGGTAATCATACGCAAG
CAATGCTACCCCAAAAGCTAATCCTCACTCAACGATGGTCGCCATACGCAAG
CAATGCTACCCTAAAAGCTAATCCTCACTCATCGAAGGTAATCATAGGCAAG
CAATGCTGCCCCAAAACGAATCCCACTCAACGAAGGTCATCATATGAAGC
CAATGCTACCCCAAAACTAAAACCGCTCCCAACGAAGGTCACCATATGAAGCCAATGCTACC
> AATAAAGTGT Con:1 reps=7 [112827,113253] l-int=427 l-seq = 52
AATAAAGTGTATACAAAGTGAATGGCGCAATGAAAAGTGGAAGGAACGG
AATAAAGTGTATCATAACGAGGCCAATGACACGCTAGAAAGAAGTGGGAATGA
AATAAAGTGTGTCATAGAAGTGCAATGACACGTGAGAAAGTATGAGGAAAGG
AATAAGGTGTATCATACGAAGGCAATGATGCATAAGAAAGTGGGAGGAACGG
AATAAAGTGTGTCATACGAAGGCAATGATACACGAGAAAGAAGTTGGACCGA
GATAAAGTGTGTCATAGAAGTGCAATGAAACGTGAGAAAGTATGTGGAAACG
AATAAAGTGTATCATACGAAGGCAATGACGCATATAAAAGTGGGAGGAACGG
AATAAAGTGTATCATAACGAGGCCAATGACACGCGAGAAAGTAGTGGGAATGAAATAAAGTGT
> AAGGTCATCA Con:1 reps=7 [113351,113778] l-int=428 l-seq = 52
AAGGTCATCATAGGACGCCAATGCTACCCCAAAACCAATCCCACTGAACG
AAGGTCATCATAGGAAGTCAATGCTGCCCCAAAAGCAAAATCGCATCCAACA
AAGGTCATCATAAGCAAGCAATGCTCCCCCAAAACCAAACTCACACTCAACA
AAGGTCACCATAAGCAAGCAATGCTACCCCAAAAGCAAAACCGCACCCAACA
AAGGTCATCATAAAGCAAGCAATGCTCCCCAAACCAACCCCGCACTCAACG
AAGGTCATCATAGGAAGTCAATGCTCCCCCAAAACCAACCCACACTCAACG
```

AAGGTCATCATACGAAAGCAACTACTACCCCAAAACAAACACCAACCAACCAACCAACG  
AAGGTAATCATAAAGCAAGCAATGCTGCCCAAAAAACAAAGTTCACCTAACGAAGGTCATCA  
> ATAAGATGTG Con:1 reps=10 [275907,276436] l-int=530 l-seq = 52  
ATAAGATGTGTCATAGAGGAGCAATGCCACGTGAAAAAGTCGAGTTGTCAAA  
ATAAGATGTGTCATAGAGGAGCAATGCCACGCGAGAAAACCGAGTCGTCAAA  
ATAAGATGTGTCATACGAGTGCAATGCCACGCGAAAAAGTCGAGTTGTCAAA  
ATAAGATGTGTCATACGAGTGCAATGACACGCGAGAAAACCGAGTCACGAAG  
ATAAGATGTGTCATACGAGTGCAATGCCACGCGAAAAAGTCGAGTCGTCAAA  
ATAAGATGTGTCATAGAGGAGCAATGCCACGCGAAAAAGTCGAATCGTCAAG  
ATAAGATGTGTCATACGAGTGCAATGCCACGCGAAAAAGTCGAGTCGTCAAA  
ATAAGATGTGTCATAGAGGAGCAATGCCACGCGAAAAAGTCGAATCGTCAAA  
ATAAGATGTGTCATACGAGTGCAATGCCACCCGAAAAAGCTAATTAACCAA  
ATAAAGGTCATCATACGAAGCCACACCACAAAAAAATTTCCAAGCTCAGCATAAGATGTG  
> CTGAAGGTCA Con:1 reps=5 [299755,299973] l-int=219 l-seq = 52  
CTGAAGGTCATCATACGAGCCCAATGCTTACCGAGAAAACAAGAAGAAGTTC  
CTGAAGGTCATCATAGAAGCGCAATGCTTACCGAGAAAACGGGAAGAAGCAT  
CTGAAGGTCATCATAGAAGCGCAATGCTTACCGAGAAAACAAGAAGAAGCAC  
CTGAAGGTCATCATAGAAGTGCAATGCATACCGAGAAAACAAGAAGAAGCATCTGAAGGTCA  
> CTGAGTGTCC Con:1 reps=4 [314448,314665] l-int=218 l-seq = 52  
CTGAGTGTCCATTAAACAGGATTAAAAATCCGTTAGAGCGCGAGTCATTGT  
CTGAGTGTCCATTAAACAGGATTAAAAATCCGTTAGAGCGAGGGTCATTGT  
CTGAGTGTCCATTAAACAGGATTAAAAATCCGTTAGAACAGAATCATAGT  
CTGAAAGTCCAATAAACAGGTATAAAATCCCATCAGAGCGAGAAACATGACCTGAGTGTCC  
> CCCGTTAGAG Con:1 reps=5 [339003,339220] l-int=218 l-seq = 52  
CCCGTTAGAGCAAGATTCAATAACTAAGTGTGCAATAAACAGGGTTAAAAAT  
CCCGTTAGAGCGGGATTCAATAACTGAGTGTGATTAAACAGGGTTAAAAAT  
CCCGTTAGAGCAGGATCAATAACTAAGTGTGATTAAACAGGGTTAAAAAG  
CCCGTTAGAGCAGGATTCAATAACTAAGTGTGATTAAACAGGGTTAAAAATCCCGTTAGAG  
> TGTGAACG Con:1 reps=4 [465532,465698] l-int=167 l-seq = 52  
TGTGAACGAAAGAACTGCAGAAAGTATTCCGTTTAAAGTGGAGAATGCGT  
TGTGAACGAAAGAACTGCAGAAAGTATTCCGATCAAGTGGAGAAGATGC  
TGTGAACGAAACCAAGAAAGTATTCCGTTCAAGTGGAGAAGATGCTGTTGAACG  
> ACTCTATTTTC Con:1 reps=14 [494305,494992] l-int=688 l-seq = 52  
ACTCTATTTTCGGAACAGAGTTTCTTGTTTAAATATTCAACTCTGTCCGATTGCT  
ACTCTATTTTCGGAACAGAGTTTCTTGTTTAAATATTCAACTCTGTCTGATTGCA  
ACTCTATTTTCGGAACAGAGTTTCTTGTTTAAATATTGACCTCTGTCCGATTGCT  
ACTCTATTTTCGGAACAGAGTTTCTAGTTCATTACTCAACTCTGTCCGATTGCA  
ACTCTATTTTCGGAACAGAGTTTCTTGTTTAAATATTGAACCTCTGTCTGATTGCT  
ACTCTATTTTCGGAACAGAGATCCTTGTTTAAATATTGAACCTCTGTCTGATTGCA  
ACTCTATTTTCGGAACAGAGTTTCTTGTTTAAATATTCAACTCTGTCCGATTGCA  
ACTCTATTTTCGGAACAGAGTCTCTCGTTTAAATATTGAACCTCTGTCTGATTGCA  
ACTCTATTTTCGGAACAGAGTCTCTAGTTCATTACTCAACTCTGTCCGATTGCA  
ACTCTATTTTCGGAACAGAGTTTCTTGTTTAAATATTCAACTCTGTCTGATTGCA  
ACTCTATTTTCGGAACAGAGTCTCTTGTTTAAATATTCAACTCTGTCTGATTGCA  
ACTCTATTTTCGGACAGAGTCTCTTGTTTAAATATTCAACTCTGTCCGATTGCA  
ACTCTATTTTCGGACAGAGTCTCTTGTTTAAATATTGAACCTCTGTCCGATTGCAACTCTATTTTC  
> GTGTCATAGC Con:1 reps=8 [650939,651417] l-int=479 l-seq = 52  
GTGTCATAGCACTCGTATGACGCATTTTATATTGAATCTTTAGCTAAGTCGT  
GTGTCATAGCGGATGTATGATACACCTTATTTTAAAGATTCTATTTATTTGGC  
GTGTCATAGCACTCGTATGACGCATTTTATATTGTATCTCTAGCGATGTTGT  
GTGTCATAGCGGATGTATGATGCACCTTATTTTGAATTCATCTATTTTAC  
GTTGCATAGTGCTCGTATGATACATCTTGAATGGAATATTTAGCAATGTTGT  
GTGTCATAGCGGATGTATGATACACCTTATTTTAAAGATTCTATTTATTTGGC  
GTGTCATAGTACTCGTATGACGCATCTTATATTGAATCTTTAGCTAAGTCGT  
GTGTCATAGCGGATGTATGATACACCATATTTTAAAGATTCTATTTATTTGGC  
GTGTCATAGCACTCGTATGACGCATCTTATATTGTATCTCTAGCGATGTTGTGTGTCATAGC  
> AAGCGTGTCA Con:1 reps=19 [726998,727944] l-int=947 l-seq = 52  
AAGCGTGTCATACGAAGGCAATGCCACATGAAAAATCGGGAGGCAGGAAATG  
AAGCGTGTCATACGAAGGCGATGCCGACGAAAAATCGGGACGCAGGAAATA  
AAGCGTGTCATACGAAGGCAATGCCGATGAAAAATCGGGACGCAGGAAATA  
AAGCGTGTCATACGAAGGCAATGCCGATGAAAAATCGGGAGACAGGAAATG  
AAGCGTGTCATACGAAGGCAATGCCGATGAAAAATCGGGACGCAGGAAATA  
AAGCGTGTCATACGAAGGCAATGCCGATGAAAAATCGGGAGACAGGAAATG  
AAGCGTGTCATACGAAGGCAATGCCGATGAAAAATCGGGAGACAGGAAATG

AATGCC**GTGTCATACGAAGG**GAATGCCCGCATGAAAAATCGGGACAGCAGGAAATG  
 AAGC**GTGTCATACGAAGG**CAATGCCGCATGAAAAATCGGGACGCAGGAAATA  
 AAGC**GTGTCAT**ACAAAGGCAATGCCGCATGAAAAATCGGGACGCAGGAAATA  
 AAGC**GTGTCATACGAAGG**CAATGCCACATGAAAAATCAGAATCGAGTAAATG  
 AAGC**GTGTCATACGAAGG**CAATGCCGCATGAAAAATCGGGAGACAGGAAATG  
 AAGC**GTGTCATACGAAGG**CAATGCCGCATGAAAAATCGGGACGCAGGAAATA  
 AAGC**GTGTCATACGAAGG**CAATGATGCATGAAAAATCAGAATCGAGGAAATA  
 AAGC**GTGTCAT**ACAAAGGCAATGCCGCATGAAAAATCGGGACGCAGGAAATA  
 AAGC**GTGTCATACGAAGG**CAATGCCGCATGAAAAATCGGGACGCAGGAAATA  
 AAGC**GTGTCATACGAAGG**CAATGACGCATGAAAAATCGGGACACAGGAAATAAAGCGTGTCA  
 > TAGTCTGAGT Con:1 reps=8 [857866,858240] l-int=375 l-seq = 52  
 TAGTCTGAGTGGATATAAAACACGAAATAAAATCTCGTTGTGTATGGTGTGAGTC  
 TAGTCTGAGTGGATATAAAACACGAAATAAAATCTCGTTGTGTATGGTGTGAGTC  
 TAGTCTGAGTGGATATAAAACACGAAATAAAATCTCGTTGTGTATGGTGTGAGTC  
 TAGTCTGAGTGGATATAAAACACGAAATAAAATCTCGTTGTGTATGGTGTGAGTC  
 TAGTCTGAGTGGATATAAAACACGAAATAAAATCTCGTCTGTGATGATGAGTC  
 TAGTCTGAGTGGATATAAAACACGAAATAAAATCTCGTCTGTGAGAGTGAGCA  
 TAGTCTGAGTGGATATAAAACACGAAATAAAATCTCGTCTGTGAGAGTGAGCATAGTCTGAGT  
 > **GCCATC**TGCC Con:1 reps=4 [949082,949248] l-int=167 l-seq = 52  
**GCCATC**TGCCCCTGAGCAAGAAAAAGAGTGTGAAGGTAAGATGGGAAGCC  
**GCCATC**TGCCCATGAGCAAAACAAAAAGAGTGTGAAGGTAAGATGGGAAGCT  
**GCCATC**TGCCCATGAGCAAAACAAAAAGAGTGTGAAGGTAAGATGGGAAGCT**GCCATC**TGCC  
 > AAAGCAGAAA Con:1 reps=12 [1015273,1015855] l-int=583 l-seq = 52  
 AAAGCAGAAATAATTGTCTGAAGGTCATCACACGAAGT**CAATGCT**ACCCGAA  
 AAAGCAGAAAAATGTTCTGAAGGTCATCATACGAAGT**CAATGCT**ACCCGAA  
 AAAGCAGAAAAATGTTCTGAAGGTCATCATACGAAGT**CAATGCT**GCTCGAA  
 AAAGCAGAAAAATGTTCTGAAGGTCATCATACGAGGT**CAATGCT**GCTCGAA  
 AAAGCAGAAAAATGTTCTGAAGGTCATCATACGAGGT**CAATGCT**ACCCGAA  
 AAAGCAGAAAAATGTTCTGAAGGTCATCATACGAGGT**CAATGCT**ACCCGAA  
 AAAGCAGAAAAATGTTCTGAAGGTCATCATACGAGGT**CAATGCT**ACCTGAA  
 AAAGCAGAAAAATGTTCTGAAGGTCATCATACGAGGT**CAATGCT**ACCCGAA  
 AAAGCAGAAAAATGTTCTGAAGGTCATCATACGAGGT**CAATGCT**ACCCGAA  
 AAAGCAGAAAAATGTTCTGAAGGTCATCATACGAAGT**CAATGCT**ACCTGAA  
 AAAGCAGAAAAATGTTCTGAAGGTCATCATACGAGGTCAATACTACCCGAGAAAGCAGAAA  
 > GTAGCATAGC Con:1 reps=7 [1178020,1178446] l-int=427 l-seq = 52  
 GTAGCATAGCTTCTCTATGCTGACCGTGATTGTTTAATTGTTTCAC TGACGA  
 GTAGCATAGCGCTTGATGATAACCTTTAGAAATAGTGTGATCGATTTTTCGG  
 GTAGCATAGCTTCTCTATGCTGACCGTGATTGTTTAATTGTTTCAC TGACGG  
 TC**AGCATTG**CGCTTGATGATTACCTTTAGAAATAGTGTGATCGTTTTTTGGG  
 GTAGCATAGCTTCAGT**ATGATGACC**GTGATTGTTTAATTGTTTCAC TGACGA  
 GTAGCATAGCGCTTGATGATAACCTTTAGAAATAGTGTGATCGTTTTTTCGG  
 GTAGCATAGCTTCTCTATGCTGACCGTGATTGTTTAATTGTTTCAC TGACGG  
 TCAGCATAGCGCTTGATGATTACCGTGATTGTTTAATTGTTTCAC TGACGAGTAGCATAGC  
 > AT**GTGTCATT** Con:1 reps=10 [1193617,1194303] l-int=687 l-seq = 52  
 AT**GTGTCATT**TGGCCTTGATGAAACGGAATATTGGATTGCTTTTTATTTTTAC  
 AT**GTGTCATT**TGATCTCGT**ATGACAC**GAGTTATTGGATTGCTTCTTATTTTTC  
 AT**GTGTCATT**TGGCCTTGT**ATGACAC**GGAATATTGGCTGGCCTTTTTATTTTTTC  
 AT**GTGTCATT**TCCCATGT**ATGACAC**AAGTTATTGGATTGCTTTCTAATTTTTC  
 AAG**GTGTCATT**TGCTCTTGT**ATGACAC**ACGTTATTGGAATACTTTCTAATTTTTC  
 AT**GTGTCATT**TGCCCTCGT**ATGACAC**ACGTTATTGGAATACTTTCTAATTTTTC  
 AT**GTGTCATT**TCCCATGT**ATGACAC**ACGTTATTGGATTGTTTTCTAATTTTTC  
 AA**GTGTCATT**TGGTCTTGT**ATGACAC**ACGTTATTGGATTGTTTTCTAATTTTTC  
 AA**GTGTCATT**TGGTCTTGT**ATGACAC**ACGTTATTGGAATACTTTCTAATTTTTC  
 AT**GTGTCATT**TCCCATGT**ATGACAC**ACGTTATTGGATTGCTTTCTAATTTTTC  
 AT**GTGTCATT**TGCCCTCGT**ATGACAC**AAGTTATTGGATTGCTTTCTAATTTTTC  
 ATGTGTCTTTTGGTCTTGT**ATGACAC**GTGTTATTGGATTGCTTTTTATTTTTTC  
 AT**GTGTCATT**TCCCATGT**ATGACAC**CGGTTATTGGATTGCTTCTTATTTTTCAT**GTGTCATT**  
 > CCCGTTAGAA Con:1 reps=6 [1710465,1710734] l-int=270 l-seq = 52  
 CCCGTTAGAAAGATTACCCCGTGCTGAAGGTAGATAAAACAGCGTTTAAAAAT  
 CCCGTTAGAAATGATTATCCCGTGCTGAAGGTAGATAAAACAGCGTTTAAAAAT  
 CCCGTTAGAAAGGAGTCTCTCGTGCTGAAGGTAGATAAAACAGTGTTTTAAAAAG  
 CCCGTTAGAAAGTATTATCTCGTGCTGAAGGTAGATAAAACAGTGTTTTTAAAAAG  
 > AAGGTAATCA Con:1 reps=8 [2263203,2263629] l-int=427 l-seq = 52  
 AAGGTAATCATAGAAGCAACGCTACCCCAAAACACCCCCGCACTCAACG

AAGGTAATCATAGGCAAGCAATGCTACCCCAAACTAAACCGGCACCCAACA  
AAGGTAATCATAAGCAAGCAATGCTGCCCCAAAAGCCAAACCTCACTCAACG  
AAGGTCATCATAGAGAAGCAATGCTACCCCAAACTAAACCGGCACCTTAACA  
AAGGTAATCATAAGCAAGCAACGCTATCCCAAAACCACCCCGCACTCAACG  
AAGGTAATCATAAGCAAGCAATGCTACCCCAAACTAAACCGGCACCTTAACA  
AAGGTAATCATAAGCAAGCAATGCTACCCCAAAACCACCCCGCACTCAACG  
AAGGTAATCATAAGCAAGCAATGCTACCCCAAACTAAACCGGCACCCAACAAAGGTAATCA  
> AAGGTCATCA Con:1 reps=11 [2323006,2323563] l-int=558 l-seq = 52  
AAGGTCATCATACAAAGGCTATGCTACCCGACAAAACGAAGTTGAGCAGATG  
AAGGTCATCATACGAAGCCTATGCTGCCTGAAAAATTGAAACCGAGCATGCTACCCGACAAAACGAAACCGAGCAGATG  
AAGGTCATCATACGAAGTCTATGCTGCCTGAAAAATTGAAACCGAGCAGATA  
AAGGTCATCATACGAAGTCTATGCTACCCGACAAAACGAAACCGAGTAGATG  
AAGGTCATCATACGAAGTCTATGCTGCCTGAAAAATAGAAACCGAGCAGATA  
AAGGTCATCATACGAAGTCTATGCTACCCGACAAAACGAAACCGAGTAGATG  
AAGGTCATCATACGAAGTCTATGCTGCCTGAAAAATAGAAACCGAGCAGATA  
AAGGTCATCATACGAAGTCTATGCTACCCGAAAAATAGAAATCGAGCAGATG  
AAGGTCATCATACGAAGCCTATGCTACCCGAAAAATAGAAACCGAGCAGATGAAGGTCATCA  
> GTATGATGAC Con:1 reps=4 [2455362,2455527] l-int=166 l-seq = 52  
GTATGATGACCTTTAGCAGCTCGGGTTTGTTCGCGGTAGCATAGACTTT  
GTATGATGACCTTCAGCAGCTCGGGTTTGTTCGCGGTAGCATAGGCTCC  
GTATGATGACCTTCAGCGGTTTCGGGTTCTTTTCGCGGTAGCATAGACTTTGTATGATGAC  
> ACACCTTTATT Con:1 reps=7 [2556156,2556529] l-int=374 l-seq = 52  
ACACCTTTATTTCGTATCGACATACCTTTCTCACGTGTCATTGCACTTCTATGAT  
ACACCTTTATTTGTTCTCTACTACTTTCTCATGCGTCATTGCCTTCGTATGAC  
ACACCTTTATTTCGTTTCCACATAAATCTTCACGTGTCATTGCACTTCTATGAC  
ACACCTTTATTTTGATCCCACTACTTTCTCACGTGTCATTGAGCTCGTATGAT  
ACACCTTTATTTCGTTTCTCCAACTTCTCATGCGTCATTGCCTTCGTATGAC  
ACACCTTTATTTTCATTCCTCACTACTTTCTCGCGTGTGTCATTGGCCTTCGTATGAT  
ACACCTTTATTTCGTTTCTCCCACTTTCTCATGTCATCTTCCACTTCTATGACACTTTATT  
> GCATGTCATT Con:1 reps=6 [2719945,2720267] l-int=323 l-seq = 52  
GCATGTCATTGGCCTTCGTATGACACTTATTATTTTCAAGTTATTGTGCTCTCTC  
GCATGTCATTGACCTTCGTATGACACTTATTATTTTCAAGTTCTTCAGCTTTCTT  
GCATGTCATTGCTCCCGTATGACACTTATTATTTTCAATTTTTCAGATTTCTC  
GCATGTCATTGATCCCGTATGACACTTATTATTTTCAATTTCTTCAGCTTTCTC  
GCATGTCATTGATCCCGTATGACACTTATTATTTTCAATTTCTTCAGCTTTCTC  
GCATGTCATTGACCCCGTATGACACTTATTATTTTCCGCTTTTCTCGCGTGTGTCATT  
> CTATGATGAC Con:1 reps=8 [2730527,2730954] l-int=428 l-seq = 52  
CTATGATGACCTTCTTGATTCGTTTATGAATTTTGGGCAGTAATGCTTTT  
CTATGATGACCTTCGTGATTGGTTTTTTGATTTTTCGGGTAGCATTGCTTTT  
CTATGATGACCTTCGTGATTGACTTTTGGATTATCGGGCAGCATTGCTTGC  
CTATGATGACCTTCGTGAGTGTGGTTTGGCTTTTGGGGCAGCATTGCGCGC  
CTATGATGACCTTCGTGATTGGTTTTTTGATTTTTCGGGTAGCATTGCTTTT  
CTATGATGACTTTTCGTGATTGACTTTTGGATTATCGGGCAGCATTGAGTCT  
CTATGATGACTTTTCGTGATTGACTTTTGGATTATCGGGCAGCATTGCTTAT  
CTATGATGACCTTCGTGAGTGTGGTTTGGCTTTTGGGGCAGCATTGCGCGCCTATGATGAC  
> ACACCTTTATT Con:1 reps=7 [2731003,2731378] l-int=376 l-seq = 52  
ACACCTTTATTTCGTATCGACATACCTTTCTCACGTGTCATTGCACTTCTATGAT  
ACACCTTTATTTGTTCTCTACTACTTTCTCATGCGTCATTGCCTTCGTATGAC  
ACACCTTTATTTCGTTTCCACATAAATCTTCACGTGTCATTGCACTTCTATGAC  
ACACCTTTATTTTGATCCCACTACTTTCTCACGTGTCATTGAGCTCGTATGAT  
ACACCTTTATTTCGTTTCTCCAACTTCTCATGCGTCATTGCCTTCGTATGAC  
ACACCTTTATTTTCATTCCTCACTACTTTCTCGCGTGTGTCATTGGCCTTCGTATGAT  
ACACCTTTATTTCGTTTCTCCCACTTTCTCATGTCATCTTCCACTTCTATGACACTTTATT  
> TCGTGTGTCA Con:1 reps=8 [2784025,2784399] l-int=375 l-seq = 52  
TCGTGTGTCACTGCCTTTGTACGACACATCTTATTTTCACTTCTTCTTCTTC  
TCGTGTGTCACTGCCTTTGTATGATACATCTTATTTTCACTTCTTCTTCTTC  
TCGTGTGTCACTGCCTTCGTATGATACATCTTATTTTCACTTCTTCTTCTTC  
TCGTGTGTCACTGCCTTTCTATGATGACATATTATTTTCACTTCTTCTTCTTC  
TCGTGTGTCACTGCCTTTGTATGACACATCTTATTTTCACTTCTTCTTCTTC  
TCGTGTGTCACTGCCTTTGTATGACACATCTTATTTTCACTTCTTCTTCTTC  
TCGTGTGTCACTGCCTTCGTATGATACCTTATTTTCACTTCTTCTTCTTCTTC  
> AAGGGCAGCA Con:1 reps=6 [2835835,2836208] l-int=374 l-seq = 52  
AAGGGCAGCATACGAAGCATATGCTGCCGAAAAACGAAGTTGAGCAGATC  
ATGGTCATCATACGAAGCATATGCCACCCGAAAAACGAAGCGAGCAGATA



AAGGTCACCATACGAAGCCTATGCCACCCGAAAATATGAAAGCGAGCAGATG  
AAGGGCAGCATACGAAGCCTATGCCACCCGAAAAACGAAATCGAGCAGATG  
AAGGGCAGCATACGAAGCATATGCTTCCCGAAAATATGAAATCGAGCAGATG  
AAGGGCAGCATACGATGCCTATGCCCTCCCGAAAAAATCAAATCGAGCAGATG  
AAGGGCAGCATACGATGCCTATGCTTCCCGAAAATATGAAATCGAGCAGATAAGGGCAGCA  
> CCATCTTACC Con:1 reps=4 [2888411,2888577] l-int=167 l-seq = 52  
CCATCTTACCTTCACACTCTTTTTCTTGCCTCAAGGGCAGTTGGCGGCTTC  
CCATCTTACCTTCACGCTCTTTTTCTTTTGCTCAAGGGCA**GATGGC**AGCTTC  
CCATCTTACCTTCACACTCTTTTTCTTGCCTCAAGGGCAGTTGTCGACTC**GCCATC**TTACC  
> TGCGAGTGGA Con:1 reps=6 [3148329,3148598] l-int=270 l-seq = 52  
TGCGAGTGGAACATTAAAGTTCGTTAATAGCCCATGTGGTAAAGGGAGCATG  
TGCGAGTGGAACTTTAAATGTGCCTATAAAGTCCCATGAGGTCGAGGGAGCATG  
TGCGAGTGGAACTTTAAAGTACCTTTAAATCCCCTGAGGTAGAGAGAGCATG  
TGCGAGTGGAACATTAAATGCCTTTAAATCCCCTGAGGTAGAGGGATTATG  
TGCGAGTGGAACTTTAAATGTGCCTATAAAGTCCCATGAAGTCGAGGGAGCATGTGCGAGTGGA  
> GCTTTAGCAA Con:1 reps=4 [3334663,3334829] l-int=167 l-seq = 52  
GCTTTAGCAACTCTATTGGAGTTTTAAACATTGTTTCTTAGTCCTTTAGTCT  
GCTTTAGCAACTATAATGGGATTTTTAAACATTGTTTCTTAGCCCTTCAGTCT  
GCTTTAGCAACTCTATTGGGATTTTTAAACATTGTTTCTTAGCCCTTCAGTCTGCTTTAGCAA  
> ATGATGGGAT Con:1 reps=4 [3428157,3428323] l-int=167 l-seq = 52  
ATGATGGGATATTAAATATTTGTTTCATGTACACTCAGACATGCGGTGCTCTC  
ATGATGGGATATTAAACTTCTGTTTCATAGACACTCACACTTGGATTCCCTCTC  
ATGATGGGATATTAAATATTAGTTCTTGTTACACTCAGACATGCGGTGCTCTGATGATGGGAT  
> TTTTCCGTTT Con:1 reps=9 [3704894,3705320] l-int=427 l-seq = 52  
TTTTCCGTTTCAGTGGTTGCGCTCTTGCTTGAACGGAATACTTGCCTTGTG  
TTTTCCGTTTCAATGGATCCTCTCTTCCCTGAACGGAATCTTTTTTCATTTTC  
TTTTCCGTTTCAGTGGATCCTCTCTTCCCTGAACGGAATCTTTGTCGTTTTC  
TTTTCCGTTTCAGTGGATCCTCTCTTCTTTGATCGGAATCTTTTTTCATTTTC  
TTTTCCGTTTCGTTGGATCCTCTCTTCCCTGAACGGAATCTTTGTCATTTTC  
TTTTCCGTTTCAGTGGATCCTCTCTTCCCTGAACGGAATCTTTTTTCATTTTC  
TTTTCCGTTTCAGTGGATCCTCTCTTCTTTGAACGGAATCTTTGTCATTTTCTTTTCCGTTT  
> TCTTACCTTC Con:1 reps=5 [3741040,3741258] l-int=219 l-seq = 52  
TCTTACCTTCGCACACCTTTTTCTTTGCTCACGGGCA**GATGGC**AGACTCCCT  
TCTTACCTTCACCTCTTCTTTTTGCTTGCTCACGGGCA**GATGGC**GACCTCCCA  
TCTTACCTTCACACTCTTTTTCTTTGCTCAAGGGCA**GATGGC**AGACTCCCA  
TCTTACCTTCACACTCTTTTTCTTTGCTCAAGGGCA**GATGGC**AGACTCCCATCTTACCTTC  
> TTGCTTTCCT Con:1 reps=7 [3773627,3773949] l-int=323 l-seq = 52  
TTGCTTTCCTTTCTACTGCATACAGCTTCCTGGAAAGGAATACTAAGCCACT  
TTGCTTTCCTTTCTAAGGCACTCTGCATCCTGGAAAGGAATACTAAGCCACT  
TTGCTTTCCTTTCTAAGCCATTAGCTTCCTGGAAAGGAATACTAAGCCACT  
TTGCTTTCCTTTCTAAGGCACTCAGCTTCCTGGAAAGGAATACTAAGCCACT  
TTGCTTTCCTTTCTAAGGCACTCAGATTCTGAAAGGAATACTAAGCCACT  
TTGCTTTCCTTTCTGAGGCACGCAGATTCTGAAAGGAATACTAAGCCACTTTGCTTTCCT  
> AATGGGTTGC Con:1 reps=10 [3821441,3821919] l-int=479 l-seq = 52  
AATGGGTTGCTATTTTGTGTTGTACGCTTTTGTACGTTGTTTTCCTGATGG  
AATGGGTTGCTATTTTCGTTTGTACGCTTTTGTACGTTGTTTTCCTGATGG  
AATGGGTTGCTATTTTATTTTGTGTGCCTTTTGCCTGTTGTTTTCCTGCTCG  
AATGGGTTGCTATTTTATTTTGTGTGCCTTTTGCCTGTTGTTTTCCTGCTCG  
AATGGGTTGCTATTTTGTGTTTGCCTTTTGCCTGTTGTTTTCCTGCTCG  
AATGGGTTGCTATTTTGTGTTTGCCTTTTGCCTGTTGTTTTCCTGCTCG  
AATGGGTTGCTATTTTGTGTTTGCCTTTTGCCTGTTGTTTTCCTGCTCG  
AATGGGTTGCTATTTTGTGTTTGCCTTTTGCCTGTTGTTTTCCTGCTCGAATGGGTTGC  
> GCTATTTTAG Con:1 reps=5 [3849630,3849848] l-int=219 l-seq = 52  
GCTATTTTAGTTTGCTGCCCTTTCTTATGCTGTTCCCTACTTTGAATGGGAC  
GCTATTTTAGTTTGCTGCCCTTTCTTATGCTGTTCCCTACTTTGAATGGGCT  
GCTATTTTAGTTTGCTGCCCTTTTTTATGCTGTTCCCTACTTTGAATGGGCT  
GCTATTTTAGTTTGCTGCCCTTTTTTATGCTGTTCCCTACTTTGAATGGGCT  
> **TTTATTGCT** Con:1 reps=38? SON 44!! [3973488,3975783] l-int=2296 l-seq = 52  
**TTTATTGCT**TCCTTCTTATTCTCGT**GTGTCAT**TCTCTGCGT**ATGACACAT**  
CTTATTGGTTTTCTTCAATTTAC**GTGTCAT**TGATTGCGTATGAAACAC  
**TTTATTGCT**TCTTCTTCAATTTCTCAT**GTGTCAT**TGATTGCGTATGAAACAC  
**TTTATTGCT**TCTTCTTCAATTTCTCAT**GTGTCAT**TGATTGCGTATGAAACAC  
**TTTATTGCT**TCTTCTTCAATTTCTCAT**GTGTCAT**TGATTGCGTATGAAACAC

TTTATTGGCTTCTTTCTCATTCTCATGTGTCATTGACTTCGTATGAAACAC  
TTTATTGGCTTCTTTTTCATTCTCATGTGTCATTGACTTCGTATGAAACAC  
TTTATTGGCTTCTTTCTTTATTCTCGCGTGTCATTGACTCCGTATGAAACAC  
TTTATTGGCTTCTTTCTTTATTCTCGTGTGTCATTGTTGACGTATGACACAT  
TTTATTGGCTTCTTTCTTCATTCTCATGTGTCATTGACTTTGTATGAAACAC  
TTTATTGGCTTCTTTCTTTATTCTCATGTGTCATTGGCGGCGTATGACACAT  
TTTATTGGCTTCTTTCTTCATTCTCATGTGTCATTGACTTCGTATGAAACAC  
TTTATTGGCTTCTTTCTTTATTCTCGCGTGTCATTCGCTGCGTATGACACAT  
CTTATTTGGTTTTTTCTTCAATTTCACGTGTCATTGATTGCGTATGACACAT  
TTTATTGGCTTCTTTCTTTATTCTCGCGTGTCATTGACTCCGTATGAAACAC  
TTTATTGGCTTCTTTCTTTATTCTCAAGTGTCATTGTTGACGTATGACACAT  
CTTATTTGGTTTTTTCTTCAATTTCACGTGTCATTGAATGCATATGAAACAC  
TTTATTGGCTTCTTTCTTCATTCTCGTGTGTCATTGTTGACGTATGACACAT  
CTTATTTGGTTTTTTCTTCAATTTCACGTGTCATTGGATGCATATGAAACAC  
TTTATTGGCTTCTTTCTTCATTCTCGTGCCTCATTGATTGCCTATGACACAC  
TTTATTGGCTTCTTTCTTTATTCTCGCGTGTCATTGATTGCGTATGACACAT  
TTTATTGGCTTCCTTCTTCATTCTCATGCGTCATTGACTTCGTATGAAACAC  
TTTATTGGCTTCTTTTTCATTCTCATGTGTCATTGATTGCGTATGACACAT  
TTTATTGGCTTCTTTCTTCATTCTCATGTGTCATTGACTTCGTATGAAACAC  
TTTATTGGCTTCTTTCTTTATTCTCATGTGTCATTGGCGGCGTATGACACAT  
TTTATTGGCTTCTTTCTTTATTCTCATGTGTCATTGACTTCGTATGAAACAC  
TTTATTGGCTTCTTTCTTTATTCTCATGTGTCATTGACTTCGTATGAAACAC  
TTTATTGGCTTCTTTCTTTATTCTCGTATGTCATTGTTGACGTATGACACAT  
TTTATTGGCTTCTTTCTTCATTCTCATGTGTCATTGACTTTGTATGAAACAC  
TTTATTGGCTTCTTTCTTTATTCTCATGTGTCATTGGCGGCGTATGACACAT  
TTTATTGGCTTCTTTCTTCATTCTCATGTGTCATTGACTTCGTATGAAACAC  
TTTATTGGCTTCTTTCTTTATTCTCGCGTGTCATTGACTCCGTATGAAACAC  
TTTATTGGCTTCTTTCTTTATTCTCGTGTGTCATTGTTGACGTATGACACAT  
CTTATTTGGTTTTTTCTTCAATTTCACGTGTCATTGAATGCATATGAAACAC  
TTTATTGGCTTCTTTCTTCATTCTCGTGTGTCATTGTTGACGTATGACACAT  
CTTATTTGGTTTTTTCTTCAATTTCACGTGTCATTGAATGCATATGAAACAC  
TTTATTGGCTTCTTTCTTCATTCTCGTGTGTCATTGTTGACGTATGACACAT  
CTTATTTGGTTTTTTCTTCAATTTCACGTGTCATTAAATGCATATGAAACAC  
TTTATTGGCTTCTTTCTTCATTCTCGTGCCTCATTGATTGCGTATGACACAT  
TTTATTGGCTTCCTTCTTCATTCTCATGTGTCATTGATTGCGTATGACACAT  
TTTATTGGCTTCTTTCTTCATTCTCATGTGTCATTGACTTCGTATGAAACAC  
TTTATTGGCTTCTTTCTTCATTCTCATGTGTCATTGACTTCGTATGAAACAC  
TTTATTGGCTTCTTTCTTCATTCTCATGTGTCATTGACTTCGTATGAAACAC  
TTTATTGGCTTCTTTCTTTATTCTCATGTGTCATTGGCGGCGTATGACACAT  
TTTATTGGCTTCTTTCTTTATTCTCATGTGTCATTGACTTCGTATAAAACATTTATTGGCT  
> CACCTTACAA Con:1 reps=10 [3977361,3977891] l-int=531 l-seq = 52  
CACCTTACAATGTCTCTCTAATTTATTTTGCTGCCCTTCTTATGCTTTTTT  
CACCTTACAATGACTCACTAATTTAATTTGCTTCCCTTCTTATGCTTTTTT  
CACCTTACAATGGCTCGCTAATTTATTTTGCTGACCTTTATAATGCTTTTTT  
CACCTTGCAATGGCTCACTAATTTAATTTGCTGCCCTTCTTATGCTTTTTT  
CACCTTACAATGGCTCGCTAATTTAATTTGCTGCCCTTCTTATGCTTTTTT  
CACCTTACAATGGCTCGCAAAATTAACCTTGCTGCCCTTCTTATGCTTTTTT  
CACCTTACAATGGCTCGCTAATTTAATTTGCTGCCCTTCTTATGCTTTTTT  
CACCTTACAATGGCTCGCTAATTTAATTTGCTTCCCTTCTTATGCTTTTTT  
CACCTTACAATGGCTCGCTAATTTAATTTGTTGCCCTTCTTATGCTTTTTT  
CACCTTACAATGGCTCGCTAATTTAATTTTCTGCCCTTCTTATGCTTTTTT  
> AAGGAATGGG Con:1 reps=11 [3996570,3997100] l-int=531 l-seq = 52  
AAGGAATGGGGCGCTATTCTTATTTGCTGGCCTTTACCTCTGATTTTGTGA  
AAGGAATGGGGCGCTATTCTTATTTGCTGGCCTTTACCTCTGATTTCTGTGA  
AAGGAATGGGGCGCTATTCTTATTTGCTGGCCTTTACCTCTGATTTTGTGA  
AAGGAATGGGGTGCTATTCTTGTTTGCTGCCCTTTACATTCTGATTTCTGTGA  
AAGGAATGGGGCGCTATTCTTGTTTGCTGCCCTTTACCTTCTGATTTTGTGTC  
AAGGAATGGGGCGCTATTCTTATTTGCTGACCTTTACCTTCTGATTTTGTGA  
AAGGAATGGGGCGCTATTCTTGTTTGCTGGCCTTTACCTTCTGATTTTGTGA  
AAGGAATGGGGCGCTATTCTTATTTGCTGGCCTTTACCTTCTGATTTTGTGA  
AAGGAATGGGGCGCTATTCTTATTTGCTGGCCTTTACCTCTGATTTTGTGA  
AAGGAATGGGGCGCTATTCTTATTTGCTGGCCTTTACCTCTGATTTTGTGA  
> TTTCTTTCTT Con:1 reps=17 [4033931,4034772] l-int=842 l-seq = 52  
TTTCTTTCTTCTGTCAC  
ATTTCCTTCTTAGAAAGGAATACTAACTTCTCTGGC  
TTTCCTTTCTATGCACACTTCCTTCTTAGAAAGGAATACTAACTCCTCTGGC

TTTCCTTTCTATGCACCTTTTCATCCTTAGAAAGGAATACTAACTCCTCTGGC  
 TTTCCTTTCTGTGCACCTTTTCATCCTTAGAAAGGAATACTAACTCCTTTGGC  
 TTTCCTTTCTGTGCATCTTCCTCCTTAAAAAGGAATACTAACTCCTCTGGC  
 TTTCCTTTCTATGCACCTTTTCATCCTTAGAAAGGAATACTAACTCCTCTGGC  
 TTTCCTTTCTGTGCACCTTTTCATCCTTAGAAAGGAATACTAGCTCCTCTGGC  
 TTTCCTTTCTGTGCACCTTTTCATCCTTAGAAAGGAATACTAACTCCTCTGGC  
 TTTCCTTTCTATGCACCTTTTCATCCTTAGAAAGGAATACTAACTCCTCTGGC  
 TTTCCTTTCTATGCACCTTTTCATCCTTAGAAAGGAATACTAACTCCTCTGGC  
 TTTCCTTTCTATGTCCACTTCCTTCTTAGAAAGGAATACTAGCTTCTCTGGC  
 TTTCCTTTCTATGCACCTTTTCATCCTTAGAAAGGAATACTAACTCCTCTGGC  
 TTTCCTTTCTGTGCACCTTCCTCCTTAGAAAGGAATACTAGCTCCTCTGGC  
 TTTCCTTTCTATGCACCTTTTCATCCTTAAAAAGGAATACTAGCTCCTCTGGC  
 TTTCCTTTCTATGCACACATCCCAATAGAAAGGAATACTAGCTACTCTGGCTTTTCCTTTCT  
 > CATTGCTCTC Con:1 reps=19 [4063448,4064391] l-int=944 l-seq = 52  
 CATTGCTCTCGTATGACACGCTTTATTGCTTGTTTGCTTTTTTTCATGTGG  
 CATTGCTCTCGTATGACACGCTTTATTGCTTGTTTCTTTTTTTCACGTGG  
 CATTGCTCTCGTATGGCAGCTTTATTGCTTGTTTCTTTTTTTCACGTGG  
 CATTGCTCTCGTATGACACGCCTTTATTCGATTGTTTCTATTTTTTCATGTGT  
 CATTGCTCTCGTATGACACGCTTTATTGCTTGTTTCTTTTTTTCACGTGG  
 CATTGCTCTCGTATGACACGCCTTTATTCGATTGTTTCTATTTTTTCATGTGG  
 CATTGCTCTCGTATGGCAGCTTTATTGCTTGTTTGCTTTTTTTCATGTGG  
 CATTGCTCTCGTATGGCAGCGTTATTTGCTTGTTTGCTTTTTTTCATGTGT  
 CATTGCTCTCGTATGACACACTTTATTCGCTTGTTTGCTTTTTTTCATGTGT  
CATTGCTCTCGTATGACACCTTTATTCGCTTGTTTGCTTTTTTTCATGTGG  
 CATTGCTCTCGTATGACACGCTTTATTGCTTGTTTGCTTTTTTTCATGTGT  
 CATTGCTCTCGTATGACACGCTTTATTGCTTGTTTGCTTTTTTTCATGTGT  
 CATTGCTCTCGTATGACACGCTTTATTGCTTGTTTGCTTTTTTTCACGTGT  
 CATTGCTCTCGTATGACACCTTTATTCGCTTGTTTGCTTTTTTTCACGTGG  
 CATTGCTCTCGTATGACACGCTTTATTGCTTGTTTGCTTTTTTTCACGTGT  
 CATTGCTCTCGTATGACACGCCTTTATTCGATTGTTTGCTTTTTTTCATGTGG  
 CATTGCTCTCGTATGACACGCTTTATTGCTTGTTTGCTTTTTTTCATGTGG  
 CATTGCTCTCGTATGACACGCCTTTATTCACTTGTTTGCTTTTTTTCATGTGGCATTGCTCTC  
 > CTTCGTATGA Con:1 reps=6 [4069392,4069818] l-int=427 l-seq = 52  
 CTTCGTATGATACATTATGCTGGCTCTTCGGCTTTTTTCATGTGTCATTGA  
 CTTCGTATGATACATCTTATTTTCGGCTCTTCGGCTTTTTTCATGTGTCATTCG  
 ATTCGTATGATACATTATTCGCTCTTCGGCTTTTTTCATGTGTCATTCG  
 ATTCGTATGACACACATTATACTGGCTCCACTGCTTTTTTCACGTGTCATTGA  
 CCTCGTATGACACACATTATGCTGACTCTTCGCTTTTTTCATGTGTCATTGC  
 CTTCGTATGATACATCTTATTTTCGGCTCTTCGGCTTTTTTCGGTGTCATTGA  
 CTTCGTATGATACATCTTATTTTCGGCTCTTCGGCTTTTTTCATGTGTCATTCG  
 CTTCTGATGACACACATTATGCTGGCTCCACTGCTTTTTTCACGTGTCATTGGCTTCGTATGA  
 > GTATGATGAC Con:1 reps=11 [4072932,4073566] l-int=635 l-seq = 52  
 GTATGATGACCTTTCGCGACTTCCGTTTCGATTCTCGGGCAGCATTGCCTTC  
 GTATGATGACCTTTCGCGCTTCAGTTTGGTTTCTCGGGCAGCATTGCCTTC  
 GTATGTTGACCGTCGCGACTTCCGTTTCGATTCTCGGGCAGCATTGCCTTC  
 GTATGTTGACCTTCGCGGCTTCAGTTTGGTTTCTCGGGCAGCATTGCCTTC  
 GTATGATGACCTTTCAGCTCTTCAGTTTACTCTCTCGGGTTGCATAGCCTTC  
 GTATGATGACCGTTCGCGACTTCAGTTTCGATTCTCGGGCTGCATTGAACTC  
 GTATGATGACCGTTCGCGACTTCAGTATCGATTCTCGGGCAGCATTGAACCTC  
 GTATGATGACTTTCAGCTCTTCAGTTTACTCTCTCGGGTTGCATTGGACTT  
 GTATGATGACCGTCTCGACTTCCGTTTGGTTTCTCGGGCTGCATTGAACTT  
 GTATGATGACCGTTCGAGGCTTCCGTTTAAATTTCTCGGGCAGCATTGCCTTC  
 GTATGATGACCTTTCGCGGCTTCAGTTTGGATTCTCGGGCAGCATTGAACCTC  
 GTATGATGACCGTCTCGACTTCAGTTTCGATTCTCGGGCTGCATTAGCTTCGTATGATGAC  
 > AAAGGAATGC Con:1 reps=13 [4080458,4081091] l-int=634 l-seq = 52  
 AAAGGAATGCTAGACTCGTTCGCTTTCCTTTCTAACGCTCGTTCCCTTCAG  
 AAAGGAATGCTAGACTCGTTCGCTTTCCTTTCTAATGCTCGTTTCTCTTCAG  
 AAAGGAATGCTAGACTCGTTCGCTTTCCTTTCTAATGCTGGTTTCTATTTCAG  
 AAAGGAATGCTAGACTCGTTCGCTTTCCTTTCTAATGCTGGTTTCTATTTCAG  
 AAAGGAATGCTAGACTCTTTGGCTTTCCTTTGTAACGCTCGTTTCTATTTCAG  
 AAAGGAATGCCAGCCTCGTTCGCTTTCCTTTCTAACGCTCGTTTCTATTTCAG  
 AAAGGAATGCTAGACTCGTTGGCTTTCCTTTCTAACACTGGTTCTTCTTCAG  
 AAAGGAATGCCAGACTCGTTGGCTTTCCTTTCTAACACTGGTTCTTCTTCAG  
 AAAGGAATGCCAGACTCGTTCGCTTTCCTTTCTAATGCTCGTTTCTCTTCAG

AAAGGAATGCTAGACTCTTTTCGCTTTCTTCTTAATGCTGGTTCTATTTCAG  
AAAGGAATGCTAGACTCGTTTCGCTTTCTTTCTATGCTCGTTTCTCTTCAC  
AAAGGAATGCTAGACTCGTTTCTTTTCTTTCTAACGCTCGTTACCCTTCAGAAAGGAATGC  
> CTTTCTCGGA Con:1 reps=8 [4116764,4117138] l-int=375 l-seq = 52  
CTTTCTCGGATAGTTTTCTTTTCAGAGACTTTTTCTTCTTTGAACGGAACA  
CTTTCTCGGATAGTTTTCTTTTCAGAGACTTGTTCCTTCTTTGAACGGAACA  
CTTTCTCGGATAGTTTTCTTTTCAGAGACTTTTTCTTCTTTGAACGGAATG  
CTTTCTCGGATAGTTTTCTTTTCAGAGACTTGTTCCTTCTATGAACGGAATG  
CTTTCTCGGATAGTTTTCCGTTTCAGTGACTTTTTCTTCTTTGAACGGAACG  
CTTTCTCGGATAGTTTTCCGTTTCAGTGACTGACTCCTCTCTGAACGGAATG  
CTTTCTCGGATAGTTTTCTTTTCATAGACTTTTTCTTCTTTGAACGGAACGCTTTCTCGGA  
> CTTTCTCGGG Con:1 reps=8 [4124120,4124702] l-int=583 l-seq = 52  
CTTTCTCGGGTAGCATTGGAATCGTATGTTGACCTTCAGCTTCTAAGTTTTT  
CTTTCTCAGGTAGCATTGGCTTCGTATGACGACCTTCACCGCTTCAGTTTTA  
CTTTCTCGGGCATCATTGCCTTCGTATGACGACCTTCAGCTTCTAAGTTTTA  
CTTTTTTCGGGTAGCATTGCCTTCGTATGATGACCCTTCACCGCTTTAGTTCCA  
CTATCTTGGGCAGCATTGAACCTCGTATGACGACCTTCAGCTTCTAAGTTTCA  
CTTTCTCGCGTAGCATTGCCTTAGTATGATGACCCTTCAGCTCTTCAGTTTTA  
CTTTCTCGGGTAGCATTGCCTTCGTATGACGACCTTCACCGCTTCAGTTTTA  
CTTTCTCGGGCATCATTGCCTTCGTATGACGACCTTCACCGCTTCAGTTTTA  
CTTTCTCGGGTAGCATTGCCTTCGTATGATGACCCTTCAGCTTCTAAGTTTGG  
CTTTCTCGGGCAGCATTGCCTTCGTATGATGACCCTTCAGCTTCTAAGTTTGA  
CTTTCTCGGGTAGCATTGGCTTCGTATAATGACCTTCACCGCTTCAGTTGGCTTTCTCGGG  
> TTCCTTTCTA Con:1 reps=12 [4188801,4189429] l-int=629 l-seq = 52  
TTCCTTTCTACTAGAAAAATTGATGAGGAAAGGAATACTAATCGTGTTTGTA  
TTCCTTTTCGCACATGTAAATCAATCTCGAACGGCATGCTAAACGCCTTCACT  
TTCCTTTCTACTAGTAAATCAGCCATGAAAGGAACATAAACCGT  
TTCCTTTCTACTAGTAAATCAATCGTGAAAGGAATGCCAAACGCCTTCACT  
TTCCTTTCTACTAGTAAATCAGCCATGAAAGGAATACTATACGCCTTCACT  
TTCCTTTCTACTAGTAAATCAATCGTGAAAGGAATACTATACGCCTTCACT  
TTCCTTTCTACTAGTAAGATCAGCCATGAAAGGAACACTAAACGCCTTCACT  
TTCCTTTCTACTAGTAAATCAGCCATGAAAGGAATACTAAACGCCTTCACT  
TTCCTTTCTACTAGTAAATCAGCCATGAAAGGAATACTAAACACCTTTGCA  
TTCCTTTCTACTAGTAAATCAGCCATGAAAGGAACACTAAACGCCTTTCGCT  
TTCCTTTCTACTAGTAAATCAGCCAAGAAAGGAACACTAAACGCCTTTCGCT  
TTCCTTTCTACTAGTAAATCAGCCAAGAAAGGAATACTAAACACCTTTGCATTCTTTCTA  
> TAAAGGAATA Con:1 reps=19 [4365838,4366784] l-int=947 l-seq = 52  
TAAAGGAATACTAAGCACTCTGGCTTTCTTTCTTCGTTCGATTTCCTCTTTC  
TAAAGGAATACTAAACGCTCTGGCTTTCTTTCTACGCCGATTCCCTCGTCC  
TAAAGGAATACTAAGCACTCTGGCTTTCTTTCTTCGTTCGATTTCCTCTTTC  
TAAAGGAATACTAAACGCTCTAGCTTTCTTTCTTCGTTCGATTTCCTCTTTC  
TAAAGGAATACTAAACGCTCTGGCTTTCTTTCTTCGTTCGATTCCCTCGTCC  
TAAAGGAATACTAAACGCTCTAGCTTTCTTTCTTCGTTCGATTCCCTCGCCA  
TAAAGGAATACTAAGCACTCTGGCTTTCTTTCTACATCGATTTCCTCTTAC  
TAAAGGAATACTAAACGCTCTGGCTTTCTTTCTACGCCGATTTCCTCGTCC  
TAAAGGAATACTAAGCACTCTGGCTTTCTTTCTACATCGATTCCCTCGACA  
TAAAGGAATACTAAACACTCTGGCTTTCTTTCTTCGTTCGATTCCCTCGACA  
TAAAGGAATACTAAGCACTCTGGCTTTCTTTCTACGCCGATTCCCTCGACA  
TAAAGGAATACTAAGCACTCTGGCTTTCTTTCTACATCGATTTCCTCTTAC  
TAAAGGAATACTAAACGCTCTGGCTTTCTTTCTACGCCGATTTCCTCGTCC  
TAAAGGAATACTAAGCACTCTGGCTTTCTTTCTTCGTTCGATTCCCTCGCCA  
TAAAGGAATACTAAGCACTCTGGCTTTCTTTCTACGCCGATTCCCTCGACA  
TAAAGGAATACTAAACACTCTGGCTTTCTTTCTACATCGATTCCCTCGACA  
TAAAGGAATACTAAGCACTCTGGCTTTCTTTCTACGCCGATTTCCTCGTCC  
TAAAGGAATACTAAGCACTCTGGCTTTCTATCTTCGTTCGATTCCCTCGCCATAAAGGAATA  
> CGCTATGATT Con:1 reps=9 [4408835,4409261] l-int=427 l-seq = 52  
CGCTATGATTACCGTCAACTCATTTTGGGCTCGTTCTCGGTAAGCATACAAT  
CGCTATGATTACCTTCAACTCATTTTGGACTGGATCTCGGGAAGCATACACG  
CGCTATGATTACCGTCAACTCATTTTGGGCTCTCTCTCGGGAAGCATACACG  
CGCTATGATTACCGTCAACTCATTTTGGACTGGATCTCGGGAAGCATACACG  
CGCTATGATTACCGTCAACTCATTTTGGACTCGTTCTCGGGCAGCATACAAT  
CGCTATGATTACCTTCAACTCATTTTGGGCTCGTTCTCGGGAAGCATACAAA  
CGCTATGATTACCTTCAACTCATTTTGGGCTCGTTCTCGGGCAGCATACAATCGCTATGATT  
> CTATGATTAC Con:1 reps=5 [4410749,4411019] l-int=271 l-seq = 52

CTATGATTACCTTCAACTCATTTTGGGCTCTCTCTCGGAAGCATAACACGAG  
 CTATGATTACCTTCACTCATTTTGCCTCGTTCTCGGAAGCATAACACGAG  
 CTATGGTTACCGTCAACTCATTTTGGGCTCTCTCTCGGAAGCATAACACGCG  
 CTATGATTACCGTCAACTCATTTTGGACTCGTTCTCGGCAGCATACAAACG  
 CTATGATTACCGTCAACTCATTTTGGGCTCACTCTCAGGCAGCATAAACCTCTATGATTAC  
 > GCTCAAGGGC Con:1 reps=26 [4577046,4578356] l-int=1311 l-seq = 52  
 GCTCAAGGGCTGATGGGGCGCCGCCATCTTTCCTTCACACTTTTTTTTATTC  
 GCTCAAGGGCAGTTGGGGCAACGCCATCTTACCTTCACGACACTTTTTTATTT  
 GCTCAAGGGCTGATGGCAACGCGCCATCTTAACTTCACGCTATTTTTTATTT  
 GCTCAAGGGCTGATGGCAACGCGCCATCTTACCTTCACAACACTTTTTTATTT  
 GCTCAAGGGCTGATGGCAACGCGCCATCTTACCTTCACACTATTTTTTATTC  
 GCTCAAGGGCAGATGGGGCGCCGCCATCTTACTTTCACACTATTTTTTATTT  
 GCTCAAGGGCAGATGGGACAGCGCCATCTTACCTTCACGCTATTTTTTATTC  
 GCTCAAGGGCTGATGGCAACGCGCCATCTTACCTTCACGCTATTTTTTATTC  
 GCTCAAGGGCTGATGGCAACGCGCCATCTTACCTTCACAACACTTTTTTATTT  
 GCTCAAGGGCTGATGGCAACGCGCCATCTTACCTTCACACTATTTTTTATTC  
 GCTCAAGGGCAGATGGGGCGCCGCCATCTTACTTTCACACTATTTTTTATTT  
 GCTCAAGGGCAGATGGGACAGCGCCATCTTACCTTCACGCTATTTTTTATTC  
 GCTCAAGGGCTGATGGCAACGCGCCATCTTACCTTCACGCTATTTTTTATTC  
 GCTCAAGGGCTGATGGCAACGCGCCATCTTACCTTCACAACACTTTTTTATTT  
 GCTCAAGGGCTGATGGCAACGCGCCATCTTACCTTCACACTATTTTTTATTC  
 GCTCAAGGGCAGTTGGGGCGGCTCCATCTTACCTTCACAACACTTTTTTATTT  
 GCTCAAGGGCTGATGGCAACGCGCCATCTTACCTTCACGCTATTTTTTATTC  
 GCTCAAGGGCAGATGGGGCGGCTCCATCTTACCTTCACGCTATTTTTTATTC  
 GCTCAAGGGCTGATGGCAACGCGCCATCTTACCTTCACGCTATTTTTTATTC  
 GCTCAAGGGCTGATGGCAACGCGCCATCTTACCTTCACAACACTTTTTTATTT  
 GCTCAAGGGCAGATGGGGCGGCTCCATCTTACCTTCACGCTATTTTTTATTC  
 GCTCAAGGGCTGATGGCAACGCGCCATCTTACCTTCACAACACTTTTTTATTT  
 GCTCAAGGGCAGATGGGACAGCGCCATCTTACCTTCACGCTATTTTTTATTC  
 GCTCAAGGGCTGATGGCAACGCGCCATCTTACCTTCACGCTATTTTTTATTC  
 GCTCAAGGGCAGTTGAGGCGGCTCCATCTTACCTTCACACTTTTTTTTATTC  
 GCTCAAGGGCAGATGGGGCGGCTCCATCTTACCTTCACGCTATTTTTTATTC  
 GCTCAAGGGCTGATGGCAACGCGCCATCTTACCTTCACAACACTTTTTTATTT  
 GCTCAAGGGCAGATGGGACAGCGCCATCTTACCTTCACGCTATTTTTTATTT  
 GCTCAAGGGCTGATGGCAACGCGCCATCTTACCTTCACACTTTTTTTTATTC  
 GCTCAAGGGCAGTTGGGGCGGCTCCATCTTACCTTCACACTTTTTTTTATTC  
 GCTCAAGGGCAGATGGGGCGGCTCCATCTTACCTTCACACTTCTTTTTTCTACGCTCAAGGGC  
 > ATTGCTTCTC Con:1 reps=15 [4603616,4604354] l-int=739 l-seq = 52  
 ATTGCTTCTCTTTTTTCGGACAGAGTTCCTTGTTCACTACTCAACTCTGTCCA  
 ATTGCTTCTCTTTTTTCGGACAGAGTTCCTTGTTTCTTATTCAACTCTGTCTG  
 ATTGCTTCTCTTTTTTCGGACAGAGTTCCTTGTTTATTATTCAACTCTGTCTG  
 ATTGCTTCTCTTTTTTCGGACAGAGTTCCTTGTTTATTATTCAACTCTGTCTG  
 ATTGCTTCTCTTTTTTCGGACAGAGTTCCTTGTTTATTATTCAACTCTGTCTG  
 ATTGCTTCTCTTTTTTCGGACAGAGTTCCTTGTTTATTATTCAACTCTGTCTG  
 ATTGCTTCTCTTTTTTCGGACAGAGTTCCTTGTTTATTATTCAACTCTGTCTG  
 ATTGCTTCTCTTTTTTCGGACAGAGTTCCTTGTTTATTATTCAACTCTGTCTG  
 ATTGCTTCTCTTTTTTCGGACAGATTTCTTGTTTATTATTCCTACTCTGTCTG  
 ATTGCTTCTCTTTTTTCGGACAGAGTTCCTTGTTTATTATTCAACTCTGTCTG  
 ATTGCTTCTCTTTTTTCGGACAGAGTTCCTTGTTTCTTATTCAACTCTGTCTG  
 ATTGCTTCTCTTTTTTCGGACAGAGTTCCTTGTTTATTATTCAACTCTGTCCA  
 ATTGCTTCTCTTTTTTCGGACAGAGTTCCTTGTTTATTATTCAACTCTGTCCA  
 ATTGCTTCTCTTTTTTCGGACAGAGTCTCTTGCTCATTACTCAACTCTGTCCGATTGCTTCTC

## **B. weihaiensis (NZ CP016020.1). All tandem repeats with repeat 21**

We find the TCGCGG signal or its reverse (CCGCGA) in most of the repeats.  
The tandem repeat with l-seq = 60 is also included. It is not related to the other tandem repeats

--

```
> AATTCGCGGAT Con:1 reps=7 [21005,21182] l-int=178 l-seq = 21
AATTCGCGGATAGAGCTCGGAA
AATTCGCGGATAGGGCCCGGA
AACCTCGCGGATAGAACTCGGAA
AATTCGCGGATAGAGCCCGAA
AATAGCGGATAGGGCCCGGA
AATTCGCGGATAGAGCCCGAA
AATTCGCGGATAGGGCCGAGAA
AATTCGCGGATAGGGCCGAAAAATTCGCGGAT
> CGGATAGAGC Con:1 reps=10 [25511,25710] l-int=200 l-seq = 21
CGGATAGAGCACTAAGAATTCG
CGGATAGAGCACTAAGAATTCG
CGGATAGAGCCCTGAAAATCG
CGGATAGAGCACTGAAAATCG
CGGATAGAGCACTGAAAATCG
CGGATAGAGCCCTGAAAATCG
CGGATAGAGCACCAGAAAATCG
CGGATAGAGCCCTGAAAATCG
CGGATAGAGCACCAGAGAAATCACGGATAGAGC
> AATTCGCGGAT Con:1 reps=6 [29979,30094] l-int=116 l-seq = 21
AATTCGCGGATAGACGTACCGG
AATTCGCGGATAGGAGGCCAAT
AATTCGCGGATAGACGTACCGG
AATTCGCGGATAGGAGGCCAAT
AATTCGCGGATAGACGCACCAGAAATTCGCGGAT
> GGAACAGATA Con:1 reps=5 [134977,135092] l-int=116 l-seq = 21
GGAACAGATAAACCAGGGGAA
GGAACAGATAATCCAGGTGAG
GGAACAGATAAACCAGGAGAA
GGAACAGATAATCCAGGTGAGGGAACAGACCAGCCAGGAGAAGGAACAGATA
> GGAGAAGAAA Con:1 reps=8 [146949,147106] l-int=158 l-seq = 21
GGAGAAGAAACGCCAGGTGAC
GGAGAAGAAACACCGGGTGAT
GGAGAAGAAACACCGGGTGAT
GGAGAAGAAACACCAGGTGAT
GGAGAAGAAACACCGGGTGAT
GGAGAAGAAACACCAGGTGAT
GGAGAAGAAACACCGGGTGATGGAGAAGAAA
> CGAAAAATAA Con:1 reps=4 [177918,177991] l-int=74 l-seq = 21
CGAAAAATAAATAGTGAATGT
CGAAAAATAAATGCAGGATTT
CGAAAAATAATAGAGTGAAAGCGAAAAATAA
> CGAAAAATAA Con:1 reps=4 [414219,414292] l-int=74 l-seq = 21
CGAAAAATAAAGGTGAAATAT
CGAAAAATAAGTAGCTACATC
CGAAAAATAAAGTGCCAAATCCGAAAAATAA
> ATTCGCGGAAA Con:1 reps=15 [473933,474237] l-int=305 l-seq = 21
ATTCGCGGAAAAGGAGTGCCGGA
ATTCGCGGAAAAGGAGTGCCGGA
ATTCGCGGAAAAGGAGTGCCGGA
ATTCGCGGAAAAGAGGAGCCTGA
ATTCGCGGAAAAGAGGAGCCGGA
ATTCGCGGAAAAGGAGTGCCAGA
ATTCGCGGAAAAGAGGAGCCGGA
ATTCGCGGAAAAGGAGTGCCGGA
ATTCGCGGAAAAGGAGTGCCGGG
ATTCGCGGAAAAGAGGAGCCGGA
```

ATCGCGGAAAGGAGTGCCGGA  
ATCGCGGAAAGGAGTGCCGGG  
ATCGCGGAAAGAGGAGCCGGA  
ATCGCGGAAAGGAGTGCCAGGATCGCGGAAA  
> AATTCGCGGAT Con:1 reps=6 [497918,498033] l-int=116 l-seq = 21  
AATTCGCGGATAGGAGAGCTAA  
AATTCGCGGATAGAGGGCTGAA  
AATTCGCGGATAGAGGGCTGAA  
AATTCGCGGATAGAGGGCTGAA  
AATTCGCGGATAGAGGGCTGAAAATCGCGGAT  
> AGAATCGCGG Con:1 reps=4 [499255,499328] l-int=74 l-seq = 21  
AGAATCGCGGAAAGAGAGGTC  
AGAATCGCGGAAAGAGAGGTC  
AGAATCGCGGAAAGAGGGGTCAGAATCGCGG  
> GAATCGCGGA Con:1 reps=8 [684231,684388] l-int=158 l-seq = 21  
GAATCGCGGAAAGAGAGGTCA  
GAATCGCGGAAAGAGAGGTCA  
GAATCGCGGAAAGAGAGGTCA  
GAATCGCGGAAAGAGAGGACG  
GAATCGCGGAAAGAGAGGACG  
GAATCGCGGAAAGAGAGGACG  
GAATCGCGGAAAGAGAGGTTCGGAATTCGCGGA  
> GAATCGCGGA Con:1 reps=7 [757324,757664] l-int=341 l-seq = 21  
GAATCGCGGATAGAGGAGCCG  
GAATCGCGGAAAGAGGTGTGG  
GAATCGCGGAAAGAGGTGTGG  
GAATCGCGGAAAGAGGTGCCG  
GAATCGCGGAAAGAGGTGCCG  
GAATCGCGGATAGAAGCCTGA  
> AATTCGCGGAT Con:1 reps=11 [757325,757833] l-int=509 l-seq = 21  
AATTCGCGGATAGAGGAGCCG  
AATTCGCGGAAAGAGGTGTGG  
AATTCGCGGAAAGAGGTGTGG  
AATTCGCGGAAAGAGGTGCCG  
AATTCGCGGAAAGAGGTGCCG  
AATTCGCGGATAGAAGCCTGAA  
AATTCGCGGATAGAAGCCCCAA  
AATTCGCGGATAGAAGCCCCAA  
AATTCGCGGATAGAAGCCCCAA  
AATTCGCGGATAGAAGCCCCAA  
AATTCGCGGATAGACACCCAA  
AATTCGCGGATAGAAGTCCAAG  
AATTCGCGGATAGACACCCGA  
AATTCGCGGATAGAAGCCCCAAAATCGCGGAT  
> TATCCGCGA Con:1 reps=7 [790108,790244] l-int=137 l-seq = 21  
TATCCGCGAATTATGGTTGCTG  
TATCCGCGATTTTAGGTGTTG  
TATCCGCGAATTATGGTTGCTG  
TATCCGCGATTTTAGGTGTTG  
TATCCGCGAATTATGGTTGCTC  
TATCCGCGATTTTAGGTGCTCTATCCGCGAT  
> AATTCGCGGAT Con:1 reps=5 [802803,802897] l-int=95 l-seq = 21  
AATTCGCGGATAGAGCGTGTA  
AATTCGCGGATAGACACCCAT  
AATTCGCGGATAGAGCGTGTA  
AATTCGCGGATAGATCATCCATAATCGCGGAT  
> ACAGCAAGAG Con:1 reps=5 [1762840,1763090] l-int=251 l-seq = 60  
ACAGCAAGAGAGCATGATAAGGAATTTATCAAGAGATTGGCCAAAAGGCGGAGAAAAA  
ACAGCAAGAGAGCATGACAAGGAATTTTACCAAGAGATTGGTCAAAAGGTTGGAGAAAAA  
ACAGCAAGAGAGCATGATAAGGAGTACTATCAGGAAATTGGCCAAAAGGTTGGAGAAAAA  
ACAGCAAGAGAGCACGATAAAGAATTTATCAAGAGATTGGCCAAAAGGCGGGGAAAAGACAGCAAGAG  
> TATCCGCGA Con:1 reps=15 [2579124,2579428] l-int=305 l-seq = 21  
TATCCGCGATTCTGGGCACTT  
TATCCGCGATTCTGGGCACTC  
TATCCGCGATTGTGAGTGCTC



TATCCGCGATTATGAGTG TTC  
TATCCGCGATTCTGGGCACTC  
TATCCGCGATTGTGAGTGCTC  
TATCCGCGATTATGAGTG TTC  
TATCCGCGATTCTGAGCACTC  
TATCCGCGATTCTGGGCACTC  
TATCCGCGATTCTGGGCACTC  
TATCCGCGATTCTGAGTG TTC  
TATCCGCGATAATGGGCGCTC  
TATCCGCGATTCTGAGTG TTC  
TATCCGCGATAATGGGCGCTCTATCCGCGAT  
> CTATCCGCGA Con:1 reps=7 [2862732,2862868] l-int=137 l-seq = 21  
CTATCCGCGATTTTACATGTG  
CTATCCGCGATTATTGATGCC  
CTATCCGCGATTTTACATGTG  
CTATCCGCGATTATTGGTGCT  
CTATCCGCGATTTTACACGTG  
CTATCCGCGATTATTGGTGCTCTATCCGCGA  
> ATCGCGGATA Con:1 reps=12 [2986923,2987185] l-int=263 l-seq = 21  
ATCGCGGATAGGGCTCCCGGA  
ATCGCGGATAGAACCCTCATA  
ATCGCGGATAGAACCCTCATA  
ATCGCGGATAGAGCACTCATA  
ATCGCGGATAGAGCACCCCTTA  
ATCGCGGATAGAGCACCCCTTA  
ATCGCGGATAGGGCACCGGGA  
ATCGCGGATAGAACTCCCTTA  
ATCGCGGATAGAGCCCCCTTA  
ATCGCGGATAGAACACCCTTA  
ATCGTGATAGAGCTCCCTTA  
ATCGCGGATAGAGCCCCCATTATCGCGGATA  
> TCCGCGATT Con:1 reps=11 [3155990,3156787] l-int=798 l-seq = 21  
TCCGCGATT TTTGGGTGTTCTA  
TCCGCGATT TTTTCGGCGCTCTT  
TCCGCGATT TTTGGGTGTTCTA  
TCCGCGATT TTTCCGCCTCTCTT  
TCCGCGATT TTTTCGGTGTTCTA  
TCCGCGATTTCGGGATGTTCCGACAAATTTTCGCACATCCCTCATCCTCACACTTTCACTTGTTTCATTCCCCAGCTACTTAATCCTTTCTAAAGAAA  
CCAATTTTGAGTCTTTTTAAGAATTCCTAGCTAAATTAGGGTGAATGATCCTTTTCTGAGGCCCTATGCTTGTCAAAACATCCATTTAGAAAGAA  
TTCATCGTTAGATTCAAGTCTATTTCGGCTATTTTATGAGGTCTAACCGCTGTTTTGGGTGCTCTT  
TCCGCGATT TTTTCGGCGCTCTT  
TCCGCGATT TTTTGGGTGTTCTA  
TCCGCGATT TTTCCGCCTCTCTA  
TCCGCGATTTCGGGATGTTCCGACAAATTTTCACACATACCTCATCCTCACACTTTCACTTGTTTCATTCCCCAGCTACTTAATCCTTTCTAAAGAAA  
CCAATTTTGAGTCTTTTTAAGAATTCCTAGCTAAATTAGGGTGAATGATCCTTTTCTGAGGCCCTATGCTTGTCAAAACATCCATTTAGAAAGAA  
TTCATCGTTAGATTCAAGTCTATTTCGGCTATTTTATGAGGTCTAACCGCTGTTTTGGGTGCTCTT  
CCCGCGATT TTTTGGGTGTTCTT  
TCCGCGATT TTTTGGGTGTTCTA  
TCCGCGATT TTTTCGCCTCTCTT  
CCCGCGATT TTTTCGCCTCTCTT  
CCCGCGATT TTTCCGCCTCTCTTTCCGCGATT  
> TTTATTTTCG Con:1 reps=4 [3221394,3221467] l-int=74 l-seq = 21  
TTTATTTTCGATTTATGTCCA  
TTTATTTTCGAATTTGACCAA  
TTTATTTTCGAATTTTCGCCTGTTTATTTTCG  
> TATCCGCGAT Con:1 reps=5 [3277057,3277151] l-int=95 l-seq = 21  
TATCCGCGATTTTACCGGTC  
TATCCGCGATTATGGTGCTCT  
TATCCGCGATTTTACCGGTC  
TATCCGCGATTATCGTACTCTTATCCGCGAT  
> CTTTCCGCGA Con:1 reps=16 [3348404,3348992] l-int=589 l-seq = 21  
CTTTCCGCGATTATTGCCCTCT  
CTTTCCGCGATTATTGCCCTCT  
CTATCCGCGATTATCGCCTCT  
CTATCCGCGATTTCGGGAAAATGCGACAATCTTTTTAAAATTTACGTAATTTTCATGACACTACGTACTGCACTCACCTACTTGACTTCGCTTTGC

TACGATACCGCAGGATCCGGAGAATTTACTTAAGATTTTCGAGGCTCTCTTACAATTTGAGGTTTCTCTCTCTGAATTTTGTACTTTTACCACACT  
TTCAAGTACACTATTTCACGTTTTAGCTGC  
TCTTTTCGCGATTCCGCCCTCT  
CTTTCCGCGATTCCATCACCC  
CTTTCCGCGATTCCATCACCC  
CTTTCCGCGATTCCATCACCC  
CTTTCCGCGATTCCACCACCT  
CTTTCCGCGATTCCGCCCTCT  
CTTTCCGCGATTCCATCACCC  
CTTTCCGCGATTCCACCACCC  
CTTTCCGCGATTCCACCACCT  
CTTTCCGCGATTCCATCACCC  
CTTTCCGCGATTCCACCACCT  
CTTTCCGCGATTCCACCACCT  
CTTTCCGCGATTCCATCACCC  
CTTTCCGCGATTCCACCACCTCTTTCCGCGA  
> ATCGCGGATA Con:1 reps=6 [3362340,3362455] l-int=116 l-seq = 21  
ATCGCGGATAGAACACTCATA  
ATCGCGGATAGAGCCCCATA  
ATCGCGGATAGAACTCCATA  
ATCGCGGATAGAACCCCAT  
ATCGCGGATAGACCCCTCATAATCGCGGATA  
> TTTATTTTCG Con:1 reps=4 [3505433,3505526] l-int=94 l-seq = 21  
TTTATTTTCGGCTTTGAGTCA  
TTTATTTTCGCTTTTCACCA  
TTTATCTTCGGATTTGAGTCA  
TTTATTTTCGCTTTTTCTATTTTATTTTCG  
> TCCGCGATTA Con:1 reps=12 [3509098,3509360] l-int=263 l-seq = 21  
TCCGCGATTATGGCACCTCTT  
TCCGCGATTTTACGGGTCCTA  
TCCGCGATTACGGCACCTCTT  
TCCGCGATTACGGCACCTCTT  
TCCGCGATTACAGCACCTCTT  
TCCGCGATTACGGCACCTCTT  
TCCGCGATTATGGCACCTCTT  
TCCGCGATTACGGCACCTCTT  
TCCGCGATTACGGCACCTCTT  
TCCGCGATTATGGCACTCCTA  
TCCGCGATTATGACACCTCTT  
TCCGCGATTATGGCACGCTATTCCGCGATTA  
> TTTATTTTCG Con:1 reps=6 [3543299,3543414] l-int=116 l-seq = 21  
TTTATTTTCGCTTTTCCGTGT  
TTTATTTTCGGAATTGCCTTG  
TTTATTTTCGCTTTACAGGGT  
TTTATTTTCGTTTTCACTA  
TTTATTTTCGTTTTCTAGCACTTTATTTTCG  
> TCCGCGATTT Con:1 reps=13 [3632787,3633049] l-int=263 l-seq = 21  
TCCGCGATTCCAGGCCGCTTA  
TCCGCGATTCTGGACCTCCTT  
TCCGCGATTCCGAACCTCTTA  
TCCGCGATTCTGGACCTCCTA  
TCCGCGATTCCGACTCTCCTA  
TCCGCGATTCCGACTCTCCTA  
TCCGCGATTCCGACTCTCCTA  
TCCGCGATTCCGAGACCCCTA  
TCCGCGATTCCGGACCTCCTA  
TCCGCGATTCCGGACCTCCTA  
TCCGCGATTCCGACTCTCCTA  
TCCGCGATTCCGACTCTCCTATTCCGCGATTT  
> TTTATTTTCG Con:1 reps=5 [3636446,3636561] l-int=116 l-seq = 21  
TTTATTTTCGGTTTTTAATTA  
TTTATTCACGAATTTAACCAC  
TTTATTTTCGGTTTTTAATCA  
TTTATTTTCGAAATTCACGA  
TTTATTTTCGCTTTCTCGCAGTTTATTTTCG

```

> ATCGCGGGATA Con:1 reps=16 [3702467,3702792] l-int=326 l-seq = 21
ATCGCGGATAGAGCGCCATA
ATCGCGGATAAAGCACCCACT
ATCGCGGATAGAACACCCACT
ATCGCGGATAGAGCACCCACA
ATCGCGGATAGAACACCTACA
ATCGCGGATAGAGCACCCACT
ATCGCGGATAGAGCGCCACA
ATCGCGGATAGAGCACCCACA
ATCGCGGATAAAGCACCCACT
ATCGCGGATAGAGCACCCACA
ATCGCGGATAGAGCACTCATA
ATCGCGGATAGAGCACTCATA
ATCGCGGATAGAGCACTCATA
ATCGCGGATAGAGCACTCATA
ATCGCGGATAGAGCACTCATA
ATCGCGGATAGAGCACCCACAATTCGCGGATA
> TTTATTTTCG Con:1 reps=4 [3812432,3812505] l-int=74 l-seq = 21
TTTATTTTCGGTTTTGGCTCA
TTTATTTTCGCTTTTAGCCAA
TTTATTTTCGCTTTTCCACAATTTATTTTCG
> TTTATTTTCG Con:1 reps=5 [3842895,3843010] l-int=116 l-seq = 21
TTTATTTTCGATTTATTGTGG
TTTATTTTCGAATTTCTCCTT
TTTATTTTCGAATTTGATTAG
TTTATTTTCGAATTTTCACTA
> TTTATTTTCG Con:1 reps=4 [3860025,3860119] l-int=95 l-seq = 21
TTTATTTTCGAAATTTACCT
TTTATTTTCGAAGTTGATGGA
TATATTTTCGATATTTCAGGG
TTTATTTTCGAATTTGATCGTTTTATTTTCG
> TTTATTTTCG Con:1 reps=5 [4154491,4154583] l-int=93 l-seq = 21
TTTATTTTCGGGTTTGACT
TTTATTTTCGAAATTTTAGTG
TTTATTTTCGAATTTGATCAT
TTTATTTTCGAATCTGATCATTTTATTTTCG
> TTTATTTTCG Con:1 reps=4 [4176659,4176732] l-int=74 l-seq = 21
TTTATTTTCGAGTTTGATGGA
TTTATTTTCGAATTTGATCAT
TTTATTTTCGAATCTGATCTTTTATTTTCG
> AATTCGCGGAT Con:1 reps=10 [4295617,4296106] l-int=490 l-seq = 21
AATTCGCGGATAGAGACCGGAT
AATTCGCGGAAAGGACGTGCAG
AATTCGCGGATAGAGGTCCGAT
AATTCGCGGATAAGGCGTGTCG
AATTCGCGGATAGGAGCCCAAT
AATTCGCGGATAGAGCCTGATGAGATAGTCGATCACAAACCAAATTACCAAAAAAGTCTCAAGAAATCAGAGGTCCCCCCAAAGTCTGAAGAAAAA
ACACCAATTCCCACCTGAAATGCTGAGAAAAATACATCAAAAACAAGAATTGAACTCCAAAAATGAGGTTAGTGCTTAAGAACAGAGATCAACACTA
AAACTCAGTAAGAGCTCTGAGAAAAATGGTCAAACATAATGAGATCGTGTAGATGCGAAATTTGTCGGACTAACCCG
AATTCGCGGATAGAGACCGGATAATCACGGAAGGACGTGCAG
AATTCGCGGATAGAGGTCCGAT
AATTCGCGGATAAGGCGTGTCG
AATTCGCGGATAGGAGCCCAATAATCGCGGAT

```
