# Supplementary material for: Tandem Repeats in Bacillus: Unique Features and Taxonomic Distribution
Source: MDPI journal article supplement (doi:10.3390/ijms22105373), 2021-05-20
Supplement: s1 [file s1]

The program is running under the following parameters:

Output:

Prefix of the family name Bacillus

Circular permutations are allowed

Reverse sequences are considered.

Sequences are aligned while similarity: 0.600000

Alignment score: Normalized respect to the length and number of sequences.

Alignment parameters:

opening gap: -3.000000

extensio gap: -1.000000

extreme gaph: -0.500000

\*\*\*\*\*

Number of sequences=8058

There are 1967 alignments:

>Bacillus\_Fam\_1\_60\_41 Nr. of seq. 41 Alignment length(with gaps) = 64

Alignment score = 0.721735

Bacillus\_murimartini\_Bacillusgenomic.fna\_7:140667-140967 Satlength=301 Nr

of Repeats=5 RepeatLength=60 seed=TCCGCCCTTT Num.seqs=5

Similarity=0.815556

0 TCCGCC-TTTTTNG-CCGATTTCTTGATAGAATTCTTTGTCATGGTT-TTT-GCTAGTGGCTTC

Rev.of\_GCF\_000245335.1\_ASM24533v1\_genomic.fna\_8:299494-299734

Satlength=241 Nr of Repeats=4 RepeatLength=60 seed=AAAGGCGGAG Num.seqs=4

Similarity=0.790984

TCCGCC-TTTTTCG-CCGATTTCTTGATAGAATTCTTTGTCATGGTT-TTT-GCTAGTGGCTTC

Rev.of\_GCF\_001517115.1\_ASM151711v1\_genomic.fna\_21:315882-316122

Satlength=241 Nr of Repeats=4 RepeatLength=60 seed=AAAGGCGGAG Num.seqs=4

Similarity=0.816485

TCCGCC-TTTTTCG-CCGATTTCTTGATAGAATTCTTTGTCATGGTT-TTT-GCTAGTGGCTTC

Rev.of\_GCF\_000009045.1\_ASM904v1\_genomic.fna\_1:494545-494845 Satlength=301

Nr of Repeats=5 RepeatLength=60 seed=AAAAGGCGGA Num.seqs=5

Similarity=0.800546

TCCGCC-TTTTTCA-CCGATTTCTTGATAGAATTCTTTGTCATGGTT-TTT-GCTAGTGGCTTC

Rev.of\_GCF\_001719185.1\_ASM171918v1\_genomic.fna\_1:3366512-3366812

Satlength=301 Nr of Repeats=5 RepeatLength=60 seed=AAAAGGCGGA Num.seqs=5

Similarity=0.800546

TCCGCC-TTTTTCA-CCGATTTCTTGATAGAATTCTTTGTCATGGTT-TTT-GCTAGTGGCTTC

GCF\_001517135.1\_ASM151713v1\_genomic.fna\_12:117121-117361 Satlength=241 Nr

of Repeats=4 RepeatLength=60 seed=TTCTCCGCCT Num.seqs=4

Similarity=0.837037

TCCGCC-TTTTTCG-CCGATTTCTTGATAGAATTCTTTATCATGGTT-TTT-GCTAGTGGCTTC

GCF\_000245315.1\_ASM24531v1\_genomic.fna\_74:144784-145024 Satlength=241 Nr

of Repeats=4 RepeatLength=60 seed=TCTCCGCCTT Num.seqs=4

Similarity=0.833333

58 TCCGCC-TTTTTCG-CCGATTTCTTGATAGAATTCTTTGTCATGGTT-TTC-GCTAGTGGCTTC

GCF\_000507145.1\_KCTC\_13622\_01\_genomic.fna\_31:58182-58422 Satlength=241 Nr

of Repeats=4 RepeatLength=60 seed=TTCTCCGCCT Num.seqs=4

Similarity=0.803704

TCCGCC-TTTTTCG-CCAATTTCTTGATAGAATTCTTTGTCATGGTT-TTC-GCTAGTGGCTTC

Rev.of\_GCF\_000769555.1\_ASM76955v1\_genomic.fna\_1:447703-447943

Satlength=241 Nr of Repeats=4 RepeatLength=60 seed=AAAAAGGCGG Num.seqs=4

Similarity=0.840741 11  
 TCCGCC-TTTTTGG-CCGATTTCTTGATAGAATTCTTTGTCATGGTT-TTT-GCTTGTGGCTTC  
 Rev.of\_GCF\_000742675.1\_ASM74267v1\_genomic.fna\_1:4062283-4062583  
 Satlength=301 Nr of Repeats=5 RepeatLength=60 seed=AAAAGGCGGA Num.seqs=5  
 Similarity=0.886667 10  
 TCCGCC-TTTTTCG-CCAATCTCTTGATAGAATTCTTTGTCGTGGTT-TTT-GCTAGTGGCTTC  
 Rev.of\_GCF\_000196735.1\_ASM19673v1\_genomic.fna\_1:456884-457124  
 Satlength=241 Nr of Repeats=4 RepeatLength=60 seed=AAAAAGGCGG Num.seqs=4  
 Similarity=0.881481 11  
 TCCGCC-TTTTTGA-CCGATTTCTTGATAGAATTCTTTGTCGTGATT-TTT-GCTTGTGGCTTC  
 Rev.of\_GCF\_000204275.1\_ASM20427v1\_genomic.fna\_1:438961-439261  
 Satlength=301 Nr of Repeats=5 RepeatLength=60 seed=AAAAAGGCGG Num.seqs=5  
 Similarity=0.893333 11  
 TCCGCC-TTTTTCA-CCGATTTCTTGATAGAATTCTTTGTCATGATT-TTT-GCTTGTGGCTTC  
 GCF\_000262045.1\_KCTC\_13613\_01\_genomic.fna\_37:124118-124418 Satlength=301  
 Nr of Repeats=5 RepeatLength=60 seed=TCCGCCTTTT Num.seqs=5  
 Similarity=0.866667 60  
 TCCGCC-TTTTTGA-CCGATTTCTTGATAGAATTCTTTGTCATGATT-TTT-GCTTGTGGCTTC  
 Rev.of\_GCF\_000008425.1\_ASM842v1\_genomic.fna\_1:540638-540938 Satlength=301  
 Nr of Repeats=5 RepeatLength=60 seed=AAAAAGGCGG Num.seqs=5  
 Similarity=0.844444 11  
 TCCGCC-TTTTTCG-CCGATTTCTTGATAGAATTCTTTGTCATGGTT-GCG-GCTTGTGGCTTC  
 GCF\_000186125.1\_Bacillus\_BT1B\_CT2\_V1\_genomic.fna\_3:99314-99614  
 Satlength=301 Nr of Repeats=5 RepeatLength=60 seed=CCGCCTTTTT Num.seqs=5  
 Similarity=0.840000 61  
 TCCGCC-TTTTTCG-CCGATTTCTTGATAGAATTCTTTGTCATGGTT-TTG-GCTTGTGGCTTC  
 Rev.of\_GCF\_000408885.1\_ASM40888v1\_genomic.fna\_1:560702-560942  
 Satlength=241 Nr of Repeats=4 RepeatLength=60 seed=AAAGAATTCT Num.seqs=4  
 Similarity=0.881481 96  
 TCCGCC-TTTTTCG-CCGATTTCTTGATAGAATTCTTTGTCATGATT-TTG-GCTTGTGGCTTC  
 Rev.of\_GCF\_000009825.1\_ASM982v1\_genomic.fna\_1:3644328-3644568  
 Satlength=241 Nr of Repeats=4 RepeatLength=60 seed=AAAGAATTCT Num.seqs=4  
 Similarity=0.859259 36  
 TCCGCC-TTTTTCG-CCAATTTCTTGATAGAATTCTTTGTCGTGGTT-GTG-GCTAGTAGCTTC  
 Rev.of\_GCF\_900142675.1\_IMG-  
 taxon\_2654588196\_annotated\_assembly\_genomic.fna\_7:422068-422308  
 Satlength=241 Nr of Repeats=4 RepeatLength=60 seed=AAAGAATTCT Num.seqs=4  
 Similarity=0.862963 36 TCCGCC-TTTTTCG-  
 CCAATTTCTTGATAGAATTCTTTGTCGTGGTT-GTG-GCTAGTAGCTTC  
 Rev.of\_GCF\_900093775.1\_EVONIK\_BGLY\_genomic.fna\_1:580499-580799  
 Satlength=301 Nr of Repeats=5 RepeatLength=60 seed=ACAAGCAAAA Num.seqs=5  
 Similarity=0.807650 54  
 TCCGCC-TTTTTCA-CCGATCTCCTGATAGAATTCTTTATCGTGGTT-TTT-GCTTGTGGCTTC  
 Rev.of\_GCF\_000217835.1\_ASM21783v1\_genomic.fna\_1:2718394-2718694  
 Satlength=301 Nr of Repeats=5 RepeatLength=60 seed=AAAGGCGGAG Num.seqs=5  
 Similarity=0.811111 9  
 TCCGCC-TTTTTTG-CCGATTTCTTGATAGAATTCTTTATCATGNTT-TTCNGC-AGTAGNTTC  
 Rev.of\_GCF\_000832905.1\_ASM83290v1\_genomic.fna\_1:1791266-1791506  
 Satlength=241 Nr of Repeats=4 RepeatLength=60 seed=GAATTCTATC Num.seqs=4  
 Similarity=0.788889 33  
 TCCGCC-TTTTTTG-CCGATTTCTTGATAGAATTCTTTGTCATGGTT-TTCAGC-AGTGGCTTC  
 GCF\_001700275.1\_ASM170027v1\_genomic.fna\_26:46937-47426 Satlength=490 Nr  
 of Repeats=4 RepeatLength=60 seed=GCTTCGCCGC Num.seqs=3

Similarity=0.940741  
 55 GCGGCC-TTTTTTG-CCGATTTCTTGATAGAAGTCTTTGTCGTGGTT-TTCAGC-AGTGGCTTC  
 Rev.of\_GCF\_000812025.2\_ASM81202v2\_genomic.fna\_65:14068-14964  
 Satlength=897 Nr of Repeats=6 RepeatLength=60 seed=GGAGAAGCTA Num.seqs=4  
 Similarity=0.707650 63  
 TCCGCC-TTTNTGG-CCGATTTCTTGGTAGAATTCTTTATCGTGGTT-TTCGGC-GGTAGCTTC  
 Rev.of\_GCF\_000374345.1\_ASM37434v1\_genomic.fna\_32:2694-2934 Satlength=241  
 Nr of Repeats=4 RepeatLength=60 seed=AAAGGCGGAG Num.seqs=4  
 Similarity=0.740741 9  
 TCCGCC-TTTTTTG-CCGATTTCTTGATAGAATTCTTTGTCATGTTT-GTCAGC-TGTCGTTTC  
 GCF\_000430765.1\_ASM43076v1\_genomic.fna\_12:86711-87701 Satlength=991 Nr of  
 Repeats=11 RepeatLength=60 seed=GCTTCTCCGC Num.seqs=9  
 Similarity=0.760494  
 55 TCCGCC-TTTTTTG-CCAATTTCTTGGTAGAATTCTTTGTCATGATT-CTCNGA-AGTAGCTTC  
 GCF\_001591545.1\_ASM159154v1\_genomic.fna\_1:1026037-1026277 Satlength=241  
 Nr of Repeats=4 RepeatLength=60 seed=GTAGCTTCTC Num.seqs=4  
 Similarity=0.829630 112  
 TCCACC-TTTTTTG-CCGATTTCTTCATAAAAGTCTTTGTCATGATT-TTCGGA-AGTAGCTTC  
 Rev.of\_GCF\_001587375.1\_ASM158737v1\_genomic.fna\_44:3736-4036 Satlength=301  
 Nr of Repeats=5 RepeatLength=60 seed=GGAGAAGCTA Num.seqs=5  
 Similarity=0.793333 64  
 TCCACC-TT-TTTGACCAATTTCTTGATAGAATTCTTTGTCATGGTT-TTTNGC-GGTAGCTTC  
 Rev.of\_GCF\_001645705.1\_ASM164570v1\_genomic.fna\_56:31150-31450  
 Satlength=301 Nr of Repeats=5 RepeatLength=60 seed=CATGATAAAG Num.seqs=5  
 Similarity=0.911111 103  
 TCCACC-TT-TTTGTCCGATTTCTTGATAGAATTCTTTATCATGATT-CTTGGC-AGTAGCTTC  
 GCF\_000181495.1\_ASM18149v1\_genomic.fna\_185:150083-150323 Satlength=241 Nr  
 of Repeats=4 RepeatLength=60 seed=TGATAGAATT Num.seqs=4  
 Similarity=0.844444 22  
 TCCGCC-TTTTTCA-CCAATCTCCTGATAGAATTCTTTATCATGGTT-ATTAGA-CGTTGCTTC  
 GCF\_000473245.1\_ASM47324v1\_genomic.fna\_1:4494162-4494402 Satlength=241 Nr  
 of Repeats=4 RepeatLength=60 seed=GCTTCTCCGC Num.seqs=4  
 Similarity=0.763441 55  
 TCCGCC-TTTTTGA-CCGATCTCCTGATAGAATTCCTTGTCATGGTT-TTCAGA-AGTAGCTTC  
 Rev.of\_GCF\_000153365.1\_ASM15336v1\_genomic.fna\_17:33525-33765  
 Satlength=241 Nr of Repeats=4 RepeatLength=60 seed=GGCGGAGAAG Num.seqs=4  
 Similarity=0.749559 66  
 TCCGCCNTTTTTTG-CCGATTTCTTGATAGAATTCTTTGTCATGGTT-TTCAGA-AGTTGCTTC  
 Rev.of\_GCF\_001636425.1\_ASM163642v1\_genomic.fna\_1:2982966-2983206  
 Satlength=241 Nr of Repeats=4 RepeatLength=60 seed=AAAGGCGGAG Num.seqs=4  
 Similarity=0.751852 69  
 TCCGCC-TTTTTGT-CCAATTTCTTGATAGAATTCTTTGTCATGGCT-TTTAGA-AGTTGCTTC  
 Rev.of\_GCF\_002019635.1\_ASM201963v1\_genomic.fna\_3:166192-166432  
 Satlength=241 Nr of Repeats=4 RepeatLength=60 seed=TTCTATCAAG Num.seqs=4  
 Similarity=0.900000 90  
 TCCGCC-TTTTTGT-CCTATTTCTTGATAGAATTCCTTATCATGATT-TTCAGA-AGTCGCTTC  
 GCF\_001243895.1\_Bacillus\_testis\_genomic.fna\_9:994577-995012 Satlength=436  
 Nr of Repeats=7 RepeatLength=60 seed=GCTTCTCCGC Num.seqs=6  
 Similarity=0.824408 55  
 TCCGCC-TTTTTCG-CCGATTTCTTGATAGAATTCTTTGCCATGGCT-ATCAGA-AGTAGCTTC  
 Rev.of\_GCF\_001375535.1\_Bacillus\_niamensis\_genomic.fna\_6:3621472-3621832  
 Satlength=361 Nr of Repeats=6 RepeatLength=60 seed=GGTGGAGAAG Num.seqs=6  
 Similarity=0.833333 66 TCCACC-  
 CTTTTGA-CCGATCTCTTGATAGAATTCCTTATCATGATT-CTCAGC-CGTTGCTTC

GCF\_001578185.1\_ASM157818v1\_genomic.fna\_1:4250078-4250593 Satlength=516  
 Nr of Repeats=5 RepeatLength=60 seed=CTCCGCCCTTT Num.seqs=4  
 Similarity=0.918519 119  
 TCCGCC-TTTTTGG-CCAATCTCTTGATAAAATTCCTTATCATGATT-TTCGGA-TGTTGCTTC  
 Rev.of\_GCF\_001636315.1\_ASM163631v1\_genomic.fna\_1:3918880-3919180  
 Satlength=301 Nr of Repeats=5 RepeatLength=60 seed=CATGATAAAG Num.seqs=5  
 Similarity=0.915556 162  
 TCCGCC-TTTCGT-CCAATCTCTTGATAAAATCTTTATCATGATT-CTCGGC-TGTTGCTTC  
 Rev.of\_GCF\_900098925.1\_PRJEB15625\_genomic.fna\_19:237981-238620  
 Satlength=640 Nr of Repeats=6 RepeatLength=60 seed=GGCGGCGAAG Num.seqs=4  
 Similarity=0.739982 66  
 GCCGCC-TTTTGT-CCGATTCCTGGTAAAATCTTTATCATGATT-TTTGGA-AGTTGCTTC  
 GCF\_900111815.1\_PRJEB17078\_genomic.fna\_1:2949352-2949652 Satlength=301 Nr  
 of Repeats=5 RepeatLength=60 seed=GCTTCGCCGC Num.seqs=5  
 Similarity=0.815301 115  
 GCCGCC-TTTTTTA-CCGATCTCCTGGTAGAATTCTTTGTCATGATT-TTCNGC-TGTTGCTTC  
 GCF\_001654695.1\_ASM165469v1\_genomic.fna\_22:26665-26893 Satlength=229 Nr  
 of Repeats=4 RepeatLength=60 seed=TTTTTCTCCA Num.seqs=3  
 Similarity=0.866667  
 54 TCCACC-TTTTCGA-CCAATCTCTTGGTAAAATCTTTATCATGTTC-CTCAGC-TGTTTTTTC  
 Rev.of\_GCF\_001889165.1\_ASM188916v1\_genomic.fna\_1:1762840-1763080  
 Satlength=241 Nr of Repeats=4 RepeatLength=60 seed=ACAGCAAGAG Num.seqs=4  
 Similarity=0.840741 54  
 TCCGCC-CTTTTGG-CCAATCTCTTGATAGAATTCCTTATCATGCTCTCT-TGC-TGTTTTTTC

\*\* \* \*        \*\* \*\* \*\* \*    \*\* \*\* \*\* \*\* \* \*\*        \*    \*\*    \*\*\*  
 Consensus:

TCCGCCTTTTTngCCgAtTtCtTGaTAGAATTCTTTgTCATGgTtTnnGcaGTnGCTTC

>Bacillus\_Fam\_2\_52\_36 Nr. of seq. 36 Alignment length(with gaps) = 57  
 Alignment score = 0.678177  
 GCF\_000169195.2\_ASM16919v2\_genomic.fna\_1:114628-114888 Satlength=261 Nr  
 of Repeats=4 RepeatLength=52 seed=CTTAACGTAG Num.seqs=3  
 Similarity=0.760684  
 0 CTTAACGTAGACGGGCTCTAGGTGAAGGAAG-GACTTTGTTTTTN-CN--CGCTTC  
 Rev.of\_GCF\_000169195.2\_ASM16919v2\_genomic.fna\_1:485819-486339  
 Satlength=521 Nr of Repeats=10 RepeatLength=52 seed=ACATAGAGCC  
 Num.seqs=10 Similarity=0.791475  
 23 CTTAACGTAGACGGGCTCTATGTAAAGGAAG-GTCTTCGTTTTTC-CG--CGCTTT  
 GCF\_000169195.2\_ASM16919v2\_genomic.fna\_1:1467180-1467492 Satlength=313 Nr  
 of Repeats=6 RepeatLength=52 seed=CTTAACGTAG Num.seqs=6  
 Similarity=0.707692 52  
 CTTAACGTAGACGGGCTCTATGTGAAGAAAG-GCCTTCGTTTTTC-CT--CGCTTC  
 Rev.of\_GCF\_000217835.1\_ASM21783v1\_genomic.fna\_1:328870-329234  
 Satlength=365 Nr of Repeats=6 RepeatLength=52 seed=TTAAGGAAGC Num.seqs=5  
 Similarity=0.800000 57  
 CTTAACGTAGACGGGTTCTATGTGAAGAAAG-GCCGTCTTTTTTC-CG--CGCTTC  
 Rev.of\_GCF\_000169195.2\_ASM16919v2\_genomic.fna\_1:2663853-2664582  
 Satlength=730 Nr of Repeats=14 RepeatLength=52 seed=GTCTACGTTA  
 Num.seqs=13 Similarity=0.703596  
 64 CTTAACGTAGACGCGCTCTATGTNAAGAAAG-GCCNTCGTTTTTC-CG--TGCTTC  
 Rev.of\_GCF\_000169195.2\_ASM16919v2\_genomic.fna\_1:2467497-2467705  
 Satlength=209 Nr of Repeats=4 RepeatLength=52 seed=GTTAAGGAAG Num.seqs=4

Similarity=0.829060 58  
CTTAACGTAGACGGGGTCTATGTGAAGGAAG-GCCTTCGTTTTTC-CA---TGCTTC  
GCF\_000217835.1\_ASM21783v1\_genomic.fna\_1:1961170-1961482 Satlength=313 Nr  
of Repeats=6 RepeatLength=52 seed=CTCTATGTTA Num.seqs=6  
Similarity=0.823932 67  
CTTAACCTAGACGGGGTCTATGTGAAGGAAG-GCCTTCGTTTTTC-CA---TGCTTC  
Rev.of\_GCF\_000169195.2\_ASM16919v2\_genomic.fna\_1:261360-261828  
Satlength=469 Nr of Repeats=9 RepeatLength=52 seed=CTTCACATAG Num.seqs=9  
Similarity=0.817664 27  
CTTAACGTAGACGNGCTCTATGTGAAGGAAG-GCCNTCATTTTTTG-CN---CGCTTT  
GCF\_000169195.2\_ASM16919v2\_genomic.fna\_1:2075586-2075846 Satlength=261 Nr  
of Repeats=5 RepeatLength=52 seed=GCTTCCTTAA Num.seqs=5  
Similarity=0.841026 47  
CTTAACGTAGACGGGGTCTATGTGAAGGAAG-GCCNTCATTTTTTG-CA---CGCTTC  
Rev.of\_GCF\_000169195.2\_ASM16919v2\_genomic.fna\_1:1126423-1126942  
Satlength=520 Nr of Repeats=10 RepeatLength=52 seed=CTACGTAAAG  
Num.seqs=9 Similarity=0.768519  
62 CTTAACGTAGCCGGGGTCTATGTGAAGGAAG-GCCGTCATTTTTTN-CA---TGCTTT  
GCF\_000217835.1\_ASM21783v1\_genomic.fna\_1:231429-232210 Satlength=782 Nr  
of Repeats=15 RepeatLength=52 seed=GTGAAGGAAG Num.seqs=14  
Similarity=0.859115 73  
CTTAACGTAGCCGGGGTCTATGTGAAGGAAG-GCCGTCATTTTTG-CA---AGCTTT  
Rev.of\_GCF\_000169195.2\_ASM16919v2\_genomic.fna\_1:1080639-1081263  
Satlength=625 Nr of Repeats=12 RepeatLength=52 seed=CGTCTACGTT  
Num.seqs=12 Similarity=0.785548  
65 CTTAACGTAGACGGGGTCTATGTGAAGGAAG-GCCNTCNTTTTTT-CG---TGCTTT  
GCF\_000217835.1\_ASM21783v1\_genomic.fna\_1:935120-935692 Satlength=573 Nr  
of Repeats=10 RepeatLength=52 seed=CTTAACGTAG Num.seqs=9  
Similarity=0.777428  
104 CTTAACGTAGACGNGCTCTATGTGAAGNAAG-GCCNTCATTTTTTT-CG---TGCTTT  
GCF\_000217835.1\_ASM21783v1\_genomic.fna\_1:261415-261675 Satlength=261 Nr  
of Repeats=5 RepeatLength=52 seed=CTTAACGTAG Num.seqs=5  
Similarity=0.803774  
104 CTTAACGTAGACGGGGTCTATGTGAAGGAAG-ACCNTCAATTTTTT-CG---TGCTTC  
Rev.of\_GCF\_000169195.2\_ASM16919v2\_genomic.fna\_1:305183-306170  
Satlength=988 Nr of Repeats=13 RepeatLength=52 seed=CCTTCCTTAA  
Num.seqs=9 Similarity=0.810541  
32 CTTAACATAGACGAGCTCTAAGTTAAGGAAG-GCCTTCATTTTTT-CG---TGCTTT  
GCF\_000169195.2\_ASM16919v2\_genomic.fna\_1:1990467-1990883 Satlength=417 Nr  
of Repeats=8 RepeatLength=52 seed=GCTTCTTAA Num.seqs=8  
Similarity=0.800366 47  
CTTAACATAGACGCGCTCTATGTGAAGGAAG-GCCGTCATTTTTT-CG---TGCTTT  
GCF\_000169195.2\_ASM16919v2\_genomic.fna\_1:2001242-2001502 Satlength=261 Nr  
of Repeats=5 RepeatLength=52 seed=CTATGTGAAG Num.seqs=5  
Similarity=0.742138 69  
CTTAACGTAGNCGTGCNCTATGTGAAGGAAG-GCCTTCANTTTTC-CG---TGCTTC  
GCF\_000169195.2\_ASM16919v2\_genomic.fna\_1:266768-267444 Satlength=677 Nr  
of Repeats=13 RepeatLength=52 seed=CTTCCTTAAAC Num.seqs=13  
Similarity=0.710351 48  
CTTAACATAGACGCCCTCTACGTGAAGGAAG-ACCNTCNTTTTTT-CN---TGCTTC  
GCF\_000217835.1\_ASM21783v1\_genomic.fna\_1:1959525-1959733 Satlength=209 Nr  
of Repeats=4 RepeatLength=52 seed=AAGAAAGACC Num.seqs=4  
Similarity=0.794872 76  
CTTAACGTAGACGGCCTCTACGTGAAGGAAG-ACCTTCGTTTTTC-CG---TGCTTC

GCF\_000169195.2\_ASM16919v2\_genomic.fna\_1:988693-989005 Satlength=313 Nr of Repeats=6 RepeatLength=52 seed=GCTTCCTTAA Num.seqs=6 Similarity=0.777778

99 CTTAACATAGACGCACTCTAGGTGAAGGAAG-GCCGTCTTTTTTC-CA---CGCTTC  
GCF\_000169195.2\_ASM16919v2\_genomic.fna\_1:1031511-1032032 Satlength=522 Nr of Repeats=9 RepeatLength=52 seed=AAGACCTCCT Num.seqs=7 Similarity=0.848596 132

CTTAACNTAGACGGGCTCTATGTGAAGGAAG-ACCTCCTTTTTTC-CG---CGCTTC  
Rev.of\_GCF\_000169195.2\_ASM16919v2\_genomic.fna\_1:2791625-2792093 Satlength=469 Nr of Repeats=9 RepeatLength=52 seed=GTTAAGGAAG Num.seqs=9 Similarity=0.647498 162

CTTAACATAGACGCGCTCTATGTGAAGGAAG-ACNGACTTTTTTC-CN---CGCTTC  
GCF\_000169195.2\_ASM16919v2\_genomic.fna\_1:1374642-1375162 Satlength=521 Nr of Repeats=10 RepeatLength=52 seed=GCTTCCTTAA Num.seqs=10 Similarity=0.751166 151

CTTAACGTAGACGCGCTCTATGTGAAGGAAG-ACCTTCGTTTTTG-CTT---GCTTC  
Rev.of\_GCF\_000169195.2\_ASM16919v2\_genomic.fna\_1:1690005-1690680 Satlength=676 Nr of Repeats=12 RepeatLength=52 seed=TTAAGGAAGC Num.seqs=10 Similarity=0.748987

162 CTTAACNTAGACGCNCTCTATGTGAAGGAAG-ACCTTCATTTTTTC-CG---CGCTTC  
Rev.of\_GCF\_000169195.2\_ASM16919v2\_genomic.fna\_1:2018548-2019171 Satlength=624 Nr of Repeats=12 RepeatLength=52 seed=GTTAAGGAAG Num.seqs=11 Similarity=0.690572

163 CTTAACGTAGACGCGCTCTATGTGAAGGAAG-GCCTTCATTTTTTC-CN---TGCTTC  
Rev.of\_GCF\_000169195.2\_ASM16919v2\_genomic.fna\_1:2631291-2631603 Satlength=313 Nr of Repeats=6 RepeatLength=52 seed=TCTACGTTAA Num.seqs=6 Similarity=0.791195 168

CTTAACGTAGACGCTCTCTATGTGAAGGAAGNGCCTTCGTTTTTC-CG---CGCTTC  
GCF\_000169195.2\_ASM16919v2\_genomic.fna\_1:1043778-1044356 Satlength=579 Nr of Repeats=10 RepeatLength=52 seed=CCTTAACGTA Num.seqs=8 Similarity=0.815043 51

CTTAACGTAGACGCCCTCTAGGTGAAGGAAG-AGCCTCGTTTTTTT-CA---CGCTTC  
Rev.of\_GCF\_000169195.2\_ASM16919v2\_genomic.fna\_1:2627959-2628323 Satlength=365 Nr of Repeats=7 RepeatLength=52 seed=TTAAGGAAGC Num.seqs=7 Similarity=0.775336 57

CTTAACGTAGACGCGCCCTATGTGAAGGAAC-ANCTTCTTTTTTTT-CA---CGCTTC  
GCF\_000217835.1\_ASM21783v1\_genomic.fna\_1:2106488-2106748 Satlength=261 Nr of Repeats=5 RepeatLength=52 seed=CGCTTCCTTA Num.seqs=5 Similarity=0.789937 98

CTTAACGTAGACGCGCCCTATGTGAAGGAAC-ATCTTCTTTTTTTT-CA---CGCTTC  
Rev.of\_GCF\_000169195.2\_ASM16919v2\_genomic.fna\_1:867678-868249 Satlength=572 Nr of Repeats=11 RepeatLength=52 seed=GTTAAGAAAG Num.seqs=10 Similarity=0.750997

6 CTTAACGTAGGCGTGCTCTATGTAAAGGAAG-GNCGCCGAATTTT-CT---TGCTTT  
GCF\_000217835.1\_ASM21783v1\_genomic.fna\_1:429182-429858 Satlength=677 Nr of Repeats=13 RepeatLength=52 seed=CTTCTTAAC Num.seqs=9 Similarity=0.751747

48 CTTAACGTAGACGTGCTCTATGTAAAGGAAG-GACGCCGATTTTTT-CT---NNCTTT  
Rev.of\_GCF\_000169195.2\_ASM16919v2\_genomic.fna\_1:1607690-1608264 Satlength=575 Nr of Repeats=9 RepeatLength=52 seed=TCTACGTTAA Num.seqs=6 Similarity=0.834188 11

CTTAACGTAGACGCGCTCTATGTGAAGAAAC-AAGCTC-ATTTTC-CT--TCGCTTC  
Rev.of\_GCF\_000169195.2\_ASM16919v2\_genomic.fna\_1:1815223-1815483 Satlength=261 Nr of Repeats=5 RepeatLength=52 seed=AAGGAAGCGA Num.seqs=5

Similarity=0.746154 55  
 CTTAACGTAGACGCCTTCTATGTTAAGATAG-ANCCGCAATTTTT-C---TCGCTTC  
 GCF\_000169195.2\_ASM16919v2\_genomic.fna\_1:3359605-3359865 Satlength=261 Nr  
 of Repeats=4 RepeatLength=52 seed=TACGTTAAGA Num.seqs=3  
 Similarity=0.692308 18  
 CTTAACNTAGACGCACTCTACGTTAAGAAAC-A--TCGATTTTTNCN-CNCGCTTC  
 GCF\_000169195.2\_ASM16919v2\_genomic.fna\_1:1835633-1836413 Satlength=781 Nr  
 of Repeats=15 RepeatLength=52 seed=CTTAACGTAG Num.seqs=15  
 Similarity=0.802198 0  
 CTTAACGTAGACANCCCTCTATGTGAAGGAAC-AAGGCCAATTTTN-CA---TGCTTT  
 Rev.of\_GCF\_000217835.1\_ASM21783v1\_genomic.fna\_1:2666582-2667102  
 Satlength=521 Nr of Repeats=10 RepeatLength=52 seed=TCTACGTTAA  
 Num.seqs=8 Similarity=0.784799  
 11 CTTAACGTAGACAGCCTCTATGTAAAGGAAC-AAGGCCATTTTTG-CA---TGCTTC

\*\*\*\*\* \* \* \* \* \* \* \* \*  
 Consensus:

CTTAACgTAGACGngCTCTATGTgAAGgAAGgcCnTCntTTTTnCnnGCTTc

>Bacillus\_Fam\_3\_50\_31 Nr. of seq. 31 Alignment length(with gaps) = 64  
 Alignment score = 0.605623  
 BACILLUS\_PSEUDALCALIPHILUS\_genomic.fna\_1:120942-121911 Satlength=970 Nr of  
 Repeats=18 RepeatLength=51 seed=GAATCGCGGG Num.seqs=16  
 Similarity=0.881866 0  
 GAATCGCGGGGTTGCGAGT--CGA-A--AAA-GGAG--G--A--GAAACCCCGAGCAAAGGCG-  
 BACILLUS\_PSEUDALCALIPHILUS\_genomic.fna\_2:41923-42331 Satlength=409 Nr of  
 Repeats=8 RepeatLength=51 seed=CCCGAGCAAA Num.seqs=8 Similarity=0.830065  
 37 GAATCGCGGGGTTACGAGC--GGA-A--AAA-GGAG--G--A--GAAACCCCGAGCAAAGCG-  
 BACILLUS\_PSEUDALCALIPHILUS\_genomic.fna\_5:467020-467377 Satlength=358 Nr of  
 Repeats=7 RepeatLength=51 seed=GGAATCGCGG Num.seqs=7 Similarity=0.855587  
 50 GAATCGCGGGGTTGCGAGC--GGA-A--AAA-GCTG--G--A--GAAAGCCCGAGCAAACGTG-  
 BACILLUS\_PSEUDALCALIPHILUS\_genomic.fna\_10:87072-87479 Satlength=408 Nr of  
 Repeats=8 RepeatLength=51 seed=GAATCGCGGG Num.seqs=7 Similarity=0.809524  
 51 GAATCGCGGGGTTGCGAGC--GGA-A--AAA-GCGG--G--A--GAAACCCCGAGTAAACGNG-  
 BACILLUS\_PSEUDALCALIPHILUS\_genomic.fna\_10:200782-200986 Satlength=205 Nr  
 of Repeats=4 RepeatLength=51 seed=CCCGAGCAAA Num.seqs=4  
 Similarity=0.869281 88  
 GAATCGCGGGGTTGCGAGC--TGG-A--AAA-GCGG--G--A--GTAACCCCGAGCAAACGCG-  
 BACILLUS\_PSEUDALCALIPHILUS\_genomic.fna\_5:163285-163591 Satlength=307 Nr of  
 Repeats=6 RepeatLength=51 seed=CCCGAGCAAA Num.seqs=6 Similarity=0.874510  
 37 GAATCTCGGGGTTGCGAGC--GAA-A--AAA-GTAG--G--A--GAAAGCCCGAGCAAAGCG-  
 Rev.of\_BACILLUS\_PSEUDALCALIPHILUS\_genomic.fna\_6:546985-547648  
 Satlength=664 Nr of Repeats=13 RepeatLength=51 seed=TTTGCTCGGG  
 Num.seqs=13 Similarity=0.861440  
 47 GAATCGCGGGGTTGCGGGC--TGA-A--AAA-GTAG--G--A--GAAAGCCCGAGCAAAGCG-  
 Rev.of\_BACILLUS\_PSEUDALCALIPHILUS\_genomic.fna\_6:198906-199161  
 Satlength=256 Nr of Repeats=5 RepeatLength=51 seed=CGGGCTTTCT Num.seqs=5  
 Similarity=0.761635 41  
 GAATCACGGGGTTGCGNGC--GGA-A--AAA-GNAG--G--A--GAAAGCCCGAGCAAAGCC-  
 Rev.of\_BACILLUS\_PSEUDALCALIPHILUS\_genomic.fna\_6:236716-237058  
 Satlength=343 Nr of Repeats=7 RepeatLength=51 seed=CAACCCCGAG Num.seqs=6  
 Similarity=0.833333 65  
 GAATCTCGGGGTTGTGGC--TGA-AN-AAA-GNAG--G--A--GAAAGCCCGAGCAAAGCG-

Rev.of\_BACILLUS\_PSEUDALCALIPHILUS\_genomic.fna\_6:531203-531509  
 Satlength=307 Nr of Repeats=6 RepeatLength=51 seed=GCAACCCCGC Num.seqs=6  
 Similarity=0.824145 15  
 GAATCGCGGGTTGCGATG--GGA-A-AAAA-AGAG--G--A--GAAAGCCCCGAGCAAACGCG-  
 BACILLUS\_PSEUDALCALIPHILUS\_genomic.fna\_1:440937-442057 Satlength=1121 Nr  
 of Repeats=22 RepeatLength=51 seed=AAGCCCGAGC Num.seqs=20  
 Similarity=0.839835 34  
 GAATCACGGGGTTGCGAGC--TGA-A--AAA-G-GA--G--A-AGAAAGCCCCGAGCAAAAGCT-  
 BACILLUS\_PSEUDALCALIPHILUS\_genomic.fna\_1:490720-491158 Satlength=439 Nr of  
 Repeats=8 RepeatLength=51 seed=GAAGAAAGCC Num.seqs=6 Similarity=0.879739  
 80 GAATCGCGGGGTGCGAGC--TGA-A--AAA-A-CG--G--A-AGAAAGCCCCGAGCAAAAGCT-  
 BACILLUS\_PSEUDALCALIPHILUS\_genomic.fna\_5:415567-415873 Satlength=307 Nr of  
 Repeats=6 RepeatLength=51 seed=GAATCACGGG Num.seqs=6 Similarity=0.853595  
 51 GAATCACGGGGTTGCGGGC--TGA-A--AAA-G-CG--G--A-AGAAAGCCCCGAGCAAACGCT-  
 BACILLUS\_PSEUDALCALIPHILUS\_genomic.fna\_3:325147-325506 Satlength=360 Nr of  
 Repeats=7 RepeatLength=51 seed=AAAGCCCGAG Num.seqs=6 Similarity=0.835470  
 84 GAATCACGGGGTTACGAGC--AGA-A--AAA-G-AA--G--A-AGAAAGCCCCGAGCAAACGCT-  
 BACILLUS\_PSEUDALCALIPHILUS\_genomic.fna\_5:683344-683599 Satlength=256 Nr of  
 Repeats=5 RepeatLength=51 seed=AACGCCGAAT Num.seqs=5 Similarity=0.963399  
 45 GAATCGCGGGGTGCGAGC--TGA-A--AAA-G-AG--G--T-AGAAAGCCCCGAGCAAACGCC-  
 BACILLUS\_PSEUDALCALIPHILUS\_genomic.fna\_1:519811-520121 Satlength=311 Nr of  
 Repeats=6 RepeatLength=51 seed=GAATCACGGG Num.seqs=4 Similarity=0.947712  
 50 GAATCACGGGGTTGCGAGC--TGA-A--AAAGG-AA--G--A-GGA-AGCCCCGAGCAAACGCC-  
 BACILLUS\_PSEUDALCALIPHILUS\_genomic.fna\_12:22376-22706 Satlength=331 Nr of  
 Repeats=7 RepeatLength=51 seed=GAGGAGAAAAG Num.seqs=6 Similarity=0.855338  
 77 GAATCACGGGGTTACGAGC--TGA-A--AAAAG-AG--G--A-GAA-AGCCCCGAGCAAACGCG-  
 Rev.of\_BACILLUS\_PSEUDALCALIPHILUS\_genomic.fna\_6:68984-69392 Satlength=409  
 Nr of Repeats=8 RepeatLength=51 seed=AACCCCGAGA Num.seqs=8  
 Similarity=0.815018 64  
 GAATCTCGGGTTGCGAGC--NGA-A--AAA-G-AGA-G--A-AGTAAGCCCCGAGCAAAAGCC-  
 BACILLUS\_PSEUDALCALIPHILUS\_genomic.fna\_3:181573-181930 Satlength=358 Nr of  
 Repeats=7 RepeatLength=51 seed=GAATCACGGG Num.seqs=7 Similarity=0.905384  
 50 GAATCACGGGGTTGCGAGC--AGA-A--AAA-G-CG-AA--A-GGA-AGCCCCGAGCAAACGTG-  
 Rev.of\_BACILLUS\_PSEUDALCALIPHILUS\_genomic.fna\_6:167904-168436  
 Satlength=533 Nr of Repeats=9 RepeatLength=51 seed=TCTCTTTTTC Num.seqs=6  
 Similarity=0.823965 80  
 GAATCGCGGGTTGCGAGC--AGA-A--AAA-G-AG-AG--A-GGA-AGCCCCGAGCAAACGCG-  
 BACILLUS\_PSEUDALCALIPHILUS\_genomic.fna\_1:180186-180593 Satlength=408 Nr of  
 Repeats=7 RepeatLength=51 seed=CGGAATCACG Num.seqs=6 Similarity=0.786325  
 100 GAATCACGGGGTTGCGNGCT-TGA-A--AAA-G-AG-AG--A-GGA-AGCCCCGAGCAAAAGCG-  
 BACILLUS\_PSEUDALCALIPHILUS\_genomic.fna\_5:932806-933113 Satlength=308 Nr of  
 Repeats=6 RepeatLength=51 seed=GAGCAAACGC Num.seqs=5 Similarity=0.734591  
 40 GAATCACGGGGTTGC-AGC--TGG-A--AAA-G-NN--G--AGAGAAAGCCCCGAGCAAACGCT-  
 BACILLUS\_PSEUDALCALIPHILUS\_genomic.fna\_2:160131-160593 Satlength=463 Nr of  
 Repeats=8 RepeatLength=51 seed=CGGGGTGCG Num.seqs=6 Similarity=0.805983  
 5 -AATCACGGGGTTGCGAGC--GG--A--AAA-A-NG-AGT-A--GAAACCCCGAGCAAACGTGCG  
 BACILLUS\_PSEUDALCALIPHILUS\_genomic.fna\_5:550534-551044 Satlength=511 Nr of  
 Repeats=10 RepeatLength=51 seed=AATCTCGGGG Num.seqs=10  
 Similarity=0.822934 51  
 -AATCTCGGGGTGCGGGC--TG--A--AAA-G-TG-AGG-A--GAAACCCCGAGCAAACGTGCG  
 Rev.of\_BACILLUS\_PSEUDALCALIPHILUS\_genomic.fna\_2:186956-187518  
 Satlength=563 Nr of Repeats=11 RepeatLength=51 seed=AACCCCGAGA  
 Num.seqs=10 Similarity=0.780627  
 12 -AATCTCGGGGTGCGAGC--GGA-A--AAA-G-GG-CG--A--GGAACCCCGAGCAAACGCCG



Rev.of\_BACILLUS\_PSEUDALCALIPHILUS\_genomic.fna\_2:188762-189169  
 Satlength=408 Nr of Repeats=8 RepeatLength=51 seed=AACCCCGAGA Num.seqs=7  
 Similarity=0.795788 12 -  
 AATCTCGGGGTTGCGAGC--GGA-A--AAA-G-NG-NG--A--GGAACCCCGTGCAAACGCNG  
 BACILLUS\_PSEUDALCALIPHILUS\_genomic.fna\_5:312159-312465 Satlength=307 Nr of  
 Repeats=6 RepeatLength=51 seed=GAGAAAGCCC Num.seqs=6 Similarity=0.919826  
 29 -AATCTCGGGATTGCGGGC--GGA-A--AAA-G-CG-AG--A--GAAAGCCCGAGCAAACGGTG  
 BACILLUS\_PSEUDALCALIPHILUS\_genomic.fna\_16:40561-41234 Satlength=674 Nr of  
 Repeats=12 RepeatLength=51 seed=GAGAAAGCCC Num.seqs=10  
 Similarity=0.811184 29  
 -AATCTCGGGGTTGCGAGC--GGA-A--AAA-G-AG-AG--A--GAAAGCCCGAGTAAACGNGG  
 BACILLUS\_PSEUDALCALIPHILUS\_genomic.fna\_16:49541-49796 Satlength=256 Nr of  
 Repeats=5 RepeatLength=51 seed=CCCGAGCAAA Num.seqs=5 Similarity=0.789744  
 36 -AATCTCGGGGTTGCGAGC--GGA-A--AAA-G-CG-AG--A--GAAAGCCCGAGCAAACGCCG  
 BACILLUS\_PSEUDALCALIPHILUS\_genomic.fna\_10:308612-309476 Satlength=865 Nr  
 of Repeats=17 RepeatLength=51 seed=CCCGAGCAAA Num.seqs=13  
 Similarity=0.762619 36  
 -AATCACGGGGTTGCGGGC--GAGA--AAA-G-AG--G-NA--GAAAGCCCGAGCAAAAGTCG  
 BACILLUS\_PSEUDALCALIPHILUS\_genomic.fna\_2:175088-175495 Satlength=408 Nr of  
 Repeats=8 RepeatLength=51 seed=AAGCCCGAGC Num.seqs=7 Similarity=0.757113  
 34 GAATCGCGGGTTACATGC-CGGA-A--AAT-G-AG----A-AGAAAGCCCGAGCAAAAGCG-

\*\*\*\* \*\* \*

\* \*\*

\* \*\*\*\* \* \*\*\* \*

Consensus:

gAATCnCGGGGTTGCGaGcNAAAAAGaGGAGAAAgCCCGAGCAAACGcn

>Bacillus\_Fam\_4\_52\_27 Nr. of seq. 27 Alignment length(with gaps) = 53  
 Alignment score = 0.745847  
 GCF\_002019645.1\_ASM201964v1\_genomic.fna\_1:953299-954474 Satlength=1176 Nr  
 of Repeats=23 RepeatLength=51 seed=AAGGGAATCA Num.seqs=21  
 Similarity=0.949953 0  
 AAGGGAATCAGACA-GCGTCTTTCGTTCCCTTTCTTCGACTTTTGGCATCAA-  
 Rev.of\_GCF\_002019645.1\_ASM201964v1\_genomic.fna\_1:542786-543150  
 Satlength=365 Nr of Repeats=7 RepeatLength=52 seed=AGGGAACGAA Num.seqs=7  
 Similarity=0.881563 30  
 AAAGGAATCTGACA-GCACCTTTCGTTCCCTTTCTTCGACTTTTAGCACCAGT  
 Rev.of\_GCF\_002019645.1\_ASM201964v1\_genomic.fna\_1:991762-991970  
 Satlength=209 Nr of Repeats=4 RepeatLength=52 seed=AGGGAATCAA Num.seqs=4  
 Similarity=0.897436 30  
 AAAGGAATCAGACACAC-TCTTTGATTCCCTTTCTCAGGCTTTTGGCATCAGA  
 Rev.of\_GCF\_002019645.1\_ASM201964v1\_genomic.fna\_1:2696032-2696338  
 Satlength=307 Nr of Repeats=6 RepeatLength=52 seed=CCAAGAAAGG Num.seqs=4  
 Similarity=0.944444 37  
 AAGGGAATCAGACA-ACGCCTTTGATTCCCTTTCTTGGGCTTTTGACAACAGT  
 Rev.of\_GCF\_002019645.1\_ASM201964v1\_genomic.fna\_1:3491116-3491372  
 Satlength=257 Nr of Repeats=5 RepeatLength=52 seed=TGTCTGATTC Num.seqs=3  
 Similarity=0.752137 66  
 AAGGGAATCAGACA-ACCNCTTTGATTCCCTTTGTTGGGCTTTTGGCATCAGA  
 GCF\_002019645.1\_ASM201964v1\_genomic.fna\_1:2379685-2379997 Satlength=313  
 Nr of Repeats=6 RepeatLength=52 seed=TCAGACAACC Num.seqs=6  
 Similarity=0.938462 7  
 AAGGGAATCAGACA-ACCACTTCGTTCCCTTTCTCGCGCTCTTGGCACCAGA

Rev.of\_GCF\_002019645.1\_ASM201964v1\_genomic.fna\_1:341445-341964  
 Satlength=520 Nr of Repeats=10 RepeatLength=52 seed=TGTTTGATTC  
 Num.seqs=9 Similarity=0.982906  
 14 AAGGGAATCAAACA-ATGCCTTTCATTCCCTTTGTTGGGCTTTTGGCATGAGA  
 Rev.of\_GCF\_002019645.1\_ASM201964v1\_genomic.fna\_1:4262761-4263071  
 Satlength=311 Nr of Repeats=6 RepeatLength=52 seed=AAAGGGAATG Num.seqs=5  
 Similarity=0.912821 32  
 AAGGGAATCAAACA-ATGCCTTTCATTCCCTTTGTTGGGCTTTTGGCATGAGA  
 Rev.of\_GCF\_002019645.1\_ASM201964v1\_genomic.fna\_1:1336769-1336977  
 Satlength=209 Nr of Repeats=4 RepeatLength=52 seed=TGTTTGATTC Num.seqs=4  
 Similarity=0.957265 14  
 AAGGGAATCAAACA-GTGCCTTTCATTCCCTTTGTTGGGCTTTTGGGCATGAGA  
 GCF\_002019645.1\_ASM201964v1\_genomic.fna\_1:1412262-1412728 Satlength=467  
 Nr of Repeats=9 RepeatLength=52 seed=TTTGGCATGA Num.seqs=7  
 Similarity=0.890110 40  
 AAGGGAATCAGACA-ACTCCTTTCATTCCCTTTGTTGGGCTTTTGGCATGAGA  
 Rev.of\_GCF\_002019645.1\_ASM201964v1\_genomic.fna\_1:2792762-2793074  
 Satlength=313 Nr of Repeats=6 RepeatLength=52 seed=AAAGGGAATG Num.seqs=6  
 Similarity=0.897436 84  
 AAGGGAATCAAACA-ACTCTTTTCATTCCCTTTGTTGGGCTTTTGGGCATGAGA  
 GCF\_002019645.1\_ASM201964v1\_genomic.fna\_1:4144195-4144455 Satlength=261  
 Nr of Repeats=5 RepeatLength=52 seed=TTCATTCCT Num.seqs=5  
 Similarity=0.882051 124  
 AAGGGAATCAAACA-ACTCTTTTCATTCCCTTTGTTGGGCTTTTGGGCATGAGA  
 GCF\_002019645.1\_ASM201964v1\_genomic.fna\_1:4292959-4293477 Satlength=519  
 Nr of Repeats=9 RepeatLength=52 seed=AAACAACTCT Num.seqs=7  
 Similarity=0.899878 113  
 AAGGGAATCAAACA-ACTCTTTTCATTCCCTTTGTTGGGCTTTTGGCATGAGA  
 GCF\_002019645.1\_ASM201964v1\_genomic.fna\_1:3630624-3630935 Satlength=312  
 Nr of Repeats=6 RepeatLength=52 seed=ATCAAACAAC Num.seqs=5  
 Similarity=0.948718 110  
 AAGGGAATCAAACA-ACTCTTTTCATTCCCTTTGTTGGGCTTATGGCATGAGA  
 GCF\_002019645.1\_ASM201964v1\_genomic.fna\_1:5084517-5084881 Satlength=365  
 Nr of Repeats=7 RepeatLength=52 seed=GGAATCAAAC Num.seqs=7  
 Similarity=0.941392 107  
 AAAGGAATCAAACA-ACTCTTTTCATTCCCTTTGTTGGGCTTTAGGCATGAGA  
 GCF\_002019645.1\_ASM201964v1\_genomic.fna\_1:3924084-3924292 Satlength=209  
 Nr of Repeats=4 RepeatLength=52 seed=TTGGCATGAG Num.seqs=4  
 Similarity=0.901709 41  
 AAGGGAATGAAACA-ACGCTTTTCATTCCCTTTGTTGAGCTTTTGGCATGAGA  
 Rev.of\_GCF\_002019645.1\_ASM201964v1\_genomic.fna\_1:3983763-3984127  
 Satlength=365 Nr of Repeats=7 RepeatLength=52 seed=GGAATGAAAA Num.seqs=7  
 Similarity=0.899878 80  
 AAGGGAATGAAACA-ACGCTTTTCATTCCCTTTGTTGGGCTTTTGGGCATGAGA  
 Rev.of\_GCF\_002019645.1\_ASM201964v1\_genomic.fna\_1:1400861-1401069  
 Satlength=209 Nr of Repeats=4 RepeatLength=52 seed=CAAAGGGAAT Num.seqs=4  
 Similarity=0.872642 33  
 AAAGGAATGAAACA-ATGCTTTTCATTCCCTTTGGATAGCTTTTGGCATGAGA  
 Rev.of\_GCF\_002019645.1\_ASM201964v1\_genomic.fna\_1:4004918-4005178  
 Satlength=261 Nr of Repeats=5 RepeatLength=52 seed=TTTCTCATGC Num.seqs=5  
 Similarity=0.892308 54  
 AAAGGAATGAAACA-ATGCTTTTCATTCCCTTTGGATAGCTTTTGGCATGAGA  
 GCF\_002019645.1\_ASM201964v1\_genomic.fna\_1:2268253-2268461 Satlength=209  
 Nr of Repeats=4 RepeatLength=52 seed=GCATGAGAAA Num.seqs=4

Similarity=0.841880 44  
AAAGGAATGAAACA-ACGCTTTTCATTCCCTTTGGAGAGCTTTGGGCATGAGA  
Rev.of\_GCF\_002019645.1\_ASM201964v1\_genomic.fna\_1:2767735-2768306  
Satlength=572 Nr of Repeats=11 RepeatLength=52 seed=CAAAGGGAAT  
Num.seqs=10 Similarity=0.903424  
33 AAGGGAATCAAACA-ACGCTTTTCATTCCCTTTGGATGGCTTTTGGCCTGAGA  
GCF\_002019645.1\_ASM201964v1\_genomic.fna\_1:3095308-3095622 Satlength=315  
Nr of Repeats=6 RepeatLength=52 seed=TTTCATTCCC Num.seqs=5  
Similarity=0.893082 71  
AAGGGAATCAAACA-ATGCTTTTCATTCCCTTTGGATGGCTTTTGGCATGAGA  
GCF\_002019645.1\_ASM201964v1\_genomic.fna\_1:4272434-4272694 Satlength=261  
Nr of Repeats=5 RepeatLength=52 seed=TTTCATTCCC Num.seqs=5  
Similarity=0.897436 71  
AAGGGAATCAAACA-ACGCTTTTCATTCCCTTTGTAGGGCTTTTGGCATGAGA  
GCF\_002019645.1\_ASM201964v1\_genomic.fna\_1:908246-908556 Satlength=311 Nr  
of Repeats=6 RepeatLength=52 seed=GAAAGGGAAT Num.seqs=4  
Similarity=0.804527  
50 AAGGGAATCAGACA-ACACCTTTCAATCCCTTTCTTGGACTTTTTGCGTGAGA  
GCF\_002019645.1\_ASM201964v1\_genomic.fna\_1:1747684-1748098 Satlength=415  
Nr of Repeats=8 RepeatLength=52 seed=GAGAAAGGGA Num.seqs=6  
Similarity=0.873504 48  
AAGGGAATCAAACA-GCGCCTTTTCGTTCCCTTGCACCGGCTTTTGGCGAGAGA  
GCF\_002019645.1\_ASM201964v1\_genomic.fna\_1:1602707-1604007 Satlength=1301  
Nr of Repeats=25 RepeatLength=52 seed=TTTCGTTCCC Num.seqs=25  
Similarity=0.865470 19  
AAGGGAATCAGAGA-ACATCTTTTCGTTCCCTTTTCATGGGCTATTGGTGTGGGA  
GCF\_002019645.1\_ASM201964v1\_genomic.fna\_1:4783299-4783558 Satlength=260  
Nr of Repeats=5 RepeatLength=52 seed=CTTTCGTTCC Num.seqs=4  
Similarity=0.833333 70  
AAGGGAACCTGAGA-ACACCTTTTCGTTCCCTTTCTCGAGCTTTTGGTGTGAAGA

\*\* \*\*\*\* \* \* \*\* \*\*\*\*\* \*\*  
Consensus:

AAgGGAATCAaACAACgCtTTTCaTTCCCTTTgttggGCTTTtGGCATgAGA

>Bacillus\_Fam\_5\_52\_25 Nr. of seq. 25 Alignment length(with gaps) = 56  
Alignment score = 0.706369  
BACILLUS\_PSEUDALCALIPHILUS\_genomic.fna\_1:47214-47630 Satlength=417 Nr of  
Repeats=8 RepeatLength=52 seed=GTTAATGTGA Num.seqs=8 Similarity=0.884615  
0 GTTAATGTGAAGATAACGAGACCAAACCTTGGAGT---ATCTGCACAAAGAGAG-G  
BACILLUS\_PSEUDALCALIPHILUS\_genomic.fna\_5:348032-348606 Satlength=575 Nr of  
Repeats=11 RepeatLength=52 seed=GGTTAATGTG Num.seqs=10  
Similarity=0.814186 51  
GTTAATGTGCAGATAAGGAGNCCAAACCATGGAGT---ATCTGCACAAAGAGGT-G  
BACILLUS\_PSEUDALCALIPHILUS\_genomic.fna\_1:223083-223654 Satlength=572 Nr of  
Repeats=11 RepeatLength=52 seed=CTGCACAAAG Num.seqs=10  
Similarity=0.874074 37  
GTTAATGTGAAGATACAGAGTCCAAACCTTGGAGT---AACTGCACAAAGAGGC-G  
BACILLUS\_PSEUDALCALIPHILUS\_genomic.fna\_2:413864-414427 Satlength=564 Nr of  
Repeats=11 RepeatLength=52 seed=GGTTAATGTG Num.seqs=10  
Similarity=0.883476 51  
GTTAATGTGAAGATACAGAGGCCAAACCTTGGAGT---AACTGCACAAAGAGAG-G

Rev.of\_BACILLUS\_PSEUDALCALIPHILUS\_genomic.fna\_9:0-207 Satlength=208 Nr of  
 Repeats=4 RepeatLength=52 seed=CAGTATCTGC Num.seqs=4 Similarity=0.901709  
 70 GTTAATGTGCAGATACTGAGGCCAAACCTTGGAGT---AACTGCACAAAGAGGG-G  
 BACILLUS\_PSEUDALCALIPHILUS\_genomic.fna\_10:340482-340690 Satlength=209 Nr  
 of Repeats=4 RepeatLength=52 seed=CTGCACAAAG Num.seqs=4  
 Similarity=0.871795 37  
 GTTAATGTGCAGATACAGAGGCCAAACCTTGAAGT---ATCTGCACAAAGAGGC-G  
 BACILLUS\_PSEUDALCALIPHILUS\_genomic.fna\_5:905229-906112 Satlength=884 Nr of  
 Repeats=17 RepeatLength=52 seed=CGGAGTAACT Num.seqs=15  
 Similarity=0.876923 81  
 GTTAATGTGAAGATACGGAGGCCAAACTTCGGAGT---AACTGCACAAAGAGGN-G  
 BACILLUS\_PSEUDALCALIPHILUS\_genomic.fna\_1:525442-526534 Satlength=1093 Nr  
 of Repeats=21 RepeatLength=52 seed=GGTTAATGTG Num.seqs=21  
 Similarity=0.801385 51  
 GTTAATGTGAAGATACGGAAGCCAAACCTTGGAGT---ATCTGCACAAAGAAGG-G  
 BACILLUS\_PSEUDALCALIPHILUS\_genomic.fna\_5:1292643-1292851 Satlength=209 Nr  
 of Repeats=4 RepeatLength=52 seed=GTATCTGCAC Num.seqs=4  
 Similarity=0.876068 85  
 GTTAATGTGTAGATACTGAGGCCAAACCTTGGAGT---ATCTGCACAAAGAAGG-G  
 BACILLUS\_PSEUDALCALIPHILUS\_genomic.fna\_5:791934-792403 Satlength=470 Nr of  
 Repeats=9 RepeatLength=52 seed=TGTGAAGATA Num.seqs=8 Similarity=0.939560  
 57 GTTAATGTGAAGATACGGACGCCAAACCTTAGAGT---ATCTGCACAAAGAGCG-G  
 BACILLUS\_PSEUDALCALIPHILUS\_genomic.fna\_2:112951-113306 Satlength=356 Nr of  
 Repeats=7 RepeatLength=52 seed=TGTGCAGATA Num.seqs=6 Similarity=0.875052  
 5 GTTAATGTGCAGATACGGAGGCCAAACACCGAGT---ATCTGCACAAAGAGAG-G  
 BACILLUS\_PSEUDALCALIPHILUS\_genomic.fna\_5:269767-270183 Satlength=417 Nr of  
 Repeats=8 RepeatLength=52 seed=AATGTGAAGA Num.seqs=8 Similarity=0.903846  
 55 GTTAATGTGAAGATACGGAGGCCAAACCTCGGAGT---ATCTGCACAAAGAGAG-G  
 BACILLUS\_PSEUDALCALIPHILUS\_genomic.fna\_10:253447-254227 Satlength=781 Nr  
 of Repeats=15 RepeatLength=52 seed=TGTGAAGATA Num.seqs=13  
 Similarity=0.965812 57  
 GTTAATGTGAAGATACGGAGGCCAAACCTCGGAGT---ATCTGAACAAAGAGAG-G  
 BACILLUS\_PSEUDALCALIPHILUS\_genomic.fna\_3:374971-375234 Satlength=264 Nr of  
 Repeats=5 RepeatLength=52 seed=AAGATACGGA Num.seqs=4 Similarity=0.893162  
 9 GTTAATGTAAAGATACGGAGGCCAAACCTTGGAGT---AACTGCACAAAGAGAG-G  
 BACILLUS\_PSEUDALCALIPHILUS\_genomic.fna\_5:285662-285974 Satlength=313 Nr of  
 Repeats=6 RepeatLength=52 seed=TGAAGATACT Num.seqs=6 Similarity=0.852991  
 7 GTTAATGTGAAGATACTAAGGCCAAACCATGGAGT---ATCTGCACAAAGAGCG-G  
 BACILLUS\_PSEUDALCALIPHILUS\_genomic.fna\_1:210419-210887 Satlength=469 Nr of  
 Repeats=8 RepeatLength=52 seed=GGAGTAACTG Num.seqs=7 Similarity=0.887668  
 30 GTTAATGTTCAGATAAGGAGGCCAAACCTTGGAGT---AACTGCACAAAAGGC-G  
 BACILLUS\_PSEUDALCALIPHILUS\_genomic.fna\_2:443820-444288 Satlength=469 Nr of  
 Repeats=9 RepeatLength=52 seed=AGTATCTGCA Num.seqs=9 Similarity=0.915954  
 31 -TTAATGTGAAGATACTGAGGTCAAACGATGAAGT---ATCTGCACAAAGAGGGTG  
 BACILLUS\_PSEUDALCALIPHILUS\_genomic.fna\_3:62621-62933 Satlength=313 Nr of  
 Repeats=6 RepeatLength=52 seed=CAAACCAAGT Num.seqs=6 Similarity=0.960684  
 73 -TTAATGTGCAGATACGGAGGTCAAACCAAGTAGT---ATCTGCACAAAGAGGGTG  
 Rev.of\_BACILLUS\_PSEUDALCALIPHILUS\_genomic.fna\_6:515438-515906  
 Satlength=469 Nr of Repeats=9 RepeatLength=52 seed=ATCTGCACAT Num.seqs=9  
 Similarity=0.891738 65 -  
 TTAATGTGCAGATACGGAAGCTAAACCANGTAGT---AACTGCACAAAGAGGGGG  
 BACILLUS\_PSEUDALCALIPHILUS\_genomic.fna\_1:201723-201931 Satlength=209 Nr of  
 Repeats=4 RepeatLength=52 seed=GTTTATGTGA Num.seqs=4 Similarity=0.927350  
 0 GTTTATGTGAAGATGCTGGGTCCAAACCTTGGAGT---ATCTGCACAAAAGAC-A

BACILLUS\_PSEUDALCALIPHILUS\_genomic.fna\_5:501746-502107 Satlength=362 Nr of Repeats=7 RepeatLength=52 seed=AGTTTATGTG Num.seqs=6 Similarity=0.892308  
51 GTTTATGTGAAGATACGGAGGCCAAACCTTGAGT---ATCTGCACAAAAGAC-A  
BACILLUS\_PSEUDALCALIPHILUS\_genomic.fna\_6:486162-486682 Satlength=521 Nr of Repeats=10 RepeatLength=52 seed=AGTATCTGCA Num.seqs=10  
Similarity=0.835150 32  
TTTTATGTGCAGATACTGATGNCAAACCTTGAGT---ATCTGCACAAAAGAGNC-G  
BACILLUS\_PSEUDALCALIPHILUS\_genomic.fna\_1:503624-503988 Satlength=365 Nr of Repeats=7 RepeatLength=52 seed=AATGTGAAGA Num.seqs=7 Similarity=0.714002  
3 GTTAATGTGAAGATACGAGAG-CAAAAG--CGAGTGGTATCTGCACAAAAGAG-A  
BACILLUS\_PSEUDALCALIPHILUS\_genomic.fna\_1:511772-512978 Satlength=1207 Nr of Repeats=13 RepeatLength=52 seed=GTTAATGTGA Num.seqs=12  
Similarity=0.891997 52  
GTTAATGTGAAGATAAGAAAGCCAAAAGGACGATT---ATCTGCACAAAAGAGGC-A  
BACILLUS\_PSEUDALCALIPHILUS\_genomic.fna\_6:363633-363841 Satlength=209 Nr of Repeats=4 RepeatLength=52 seed=ATGTGAAGAT Num.seqs=4 Similarity=0.935897  
56 GTTTATGTGAAGATACGGGAGCCGAGAGAGCGACT---ATCTTCACAAAAGAGGC-G

\*\* \*\*\*\* \* \* \* \*  
Consensus:

GTTAATGTGaAGATACgGAgGcAAACcttGgAGTAtCTGCACAAAGAGggG

>Bacillus\_Fam\_6\_20\_21 Nr. of seq. 21 Alignment length(with gaps) = 22  
Alignment score = 0.672366  
GCF\_000153365.1\_ASM15336v1\_genomic.fna\_13:128542-128642 Satlength=101 Nr of Repeats=5 RepeatLength=20 seed=TTGCTAATAA Num.seqs=5  
Similarity=0.693651  
0 TTGCTAATAAAC--NGAAAAGN  
Rev.of\_GCF\_000153365.1\_ASM15336v1\_genomic.fna\_16:86330-86410 Satlength=81  
Nr of Repeats=4 RepeatLength=20 seed=TTTATTAGCA Num.seqs=4  
Similarity=0.593915 11  
TTGCTAATAAAA--TGAAAAAC  
Rev.of\_GCF\_000153365.1\_ASM15336v1\_genomic.fna\_18:319407-319507  
Satlength=101 Nr of Repeats=4 RepeatLength=20 seed=TTATTAGCAA Num.seqs=3  
Similarity=0.730159 30  
TTGCTAATAAAA--TGAAAAAC  
GCF\_000473245.1\_ASM47324v1\_genomic.fna\_1:632989-633089 Satlength=101 Nr of Repeats=4 RepeatLength=20 seed=TTGCTAATAA Num.seqs=3  
Similarity=0.735450  
20 TTGCTAATAAAA--TGAAAAAN  
Rev.of\_GCF\_000473245.1\_ASM47324v1\_genomic.fna\_1:3206997-3207097  
Satlength=101 Nr of Repeats=5 RepeatLength=20 seed=TTTATTAGCA Num.seqs=5  
Similarity=0.707937 11  
TTGCTAATAAAC--TGAAAAAN  
GCF\_000153365.1\_ASM15336v1\_genomic.fna\_16:171173-171253 Satlength=81 Nr of Repeats=4 RepeatLength=20 seed=AAAAGTTGCT Num.seqs=4  
Similarity=0.731481  
14 -TGCTAATAAAA-CAAAAAAGT  
Rev.of\_GCF\_000473245.1\_ASM47324v1\_genomic.fna\_1:3892181-3892261  
Satlength=81 Nr of Repeats=4 RepeatLength=20 seed=TTTATTAGCA Num.seqs=4  
Similarity=0.661376 30 -  
TGCTAATAAAATCACAAAAGT

GCF\_000153365.1\_ASM15336v1\_genomic.fna\_17:76317-76417 Satlength=101 Nr of  
 Repeats=5 RepeatLength=20 seed=AGTTGCTAAT Num.seqs=5 Similarity=0.646970  
 17 -TGCTAATAAAN-CGGAAAAGT  
 GCF\_000473245.1\_ASM47324v1\_genomic.fna\_1:662499-662693 Satlength=195 Nr  
 of Repeats=5 RepeatLength=20 seed=TGCTAATAAA Num.seqs=4  
 Similarity=0.722222  
 20 -TGCTAATAAAA-CGGAAAAGT  
 Rev.of\_GCF\_000153365.1\_ASM15336v1\_genomic.fna\_18:289784-289884  
 Satlength=101 Nr of Repeats=5 RepeatLength=20 seed=TTATTAGCAA Num.seqs=5  
 Similarity=0.740000 29 -  
 TGCTAATAAAA-CNGAAAAGT  
 Rev.of\_GCF\_000473245.1\_ASM47324v1\_genomic.fna\_1:4451397-4451497  
 Satlength=101 Nr of Repeats=5 RepeatLength=20 seed=TATTAGCAAC Num.seqs=5  
 Similarity=0.700000 28 -  
 TGCTAATAAAN-NGGAAAAGT  
 Rev.of\_GCF\_000153365.1\_ASM15336v1\_genomic.fna\_18:63090-63190  
 Satlength=101 Nr of Repeats=5 RepeatLength=20 seed=TTTATTAGCA Num.seqs=5  
 Similarity=0.666667 30  
 -TGCTAATAAAA-NGNAAAAGT  
 GCF\_000473245.1\_ASM47324v1\_genomic.fna\_1:889265-889365 Satlength=101 Nr  
 of Repeats=5 RepeatLength=20 seed=AGTTGCTAAT Num.seqs=3  
 Similarity=0.688889  
 37 -TGCTAATAAAA-NGNAAAAGT  
 GCF\_000153365.1\_ASM15336v1\_genomic.fna\_18:304350-304945 Satlength=596 Nr  
 of Repeats=11 RepeatLength=20 seed=AGTTGCTAAT Num.seqs=9  
 Similarity=0.716667 17  
 -TGCTAATATAA-CGNAAAAGT  
 GCF\_000153365.1\_ASM15336v1\_genomic.fna\_18:620027-620127 Satlength=101 Nr  
 of Repeats=5 RepeatLength=20 seed=AGTTGCTAAT Num.seqs=5  
 Similarity=0.642857  
 17 -TGCTAATAAAN-TNGAAAAGT  
 GCF\_000153365.1\_ASM15336v1\_genomic.fna\_17:566797-566897 Satlength=101 Nr  
 of Repeats=5 RepeatLength=20 seed=AGTTGCTAAT Num.seqs=5  
 Similarity=0.713333  
 17 -TGCTAATAAAN-NNNAAAAGT  
 Rev.of\_GCF\_000473245.1\_ASM47324v1\_genomic.fna\_1:3960943-3961043  
 Satlength=101 Nr of Repeats=5 RepeatLength=20 seed=TATTAGCAAC Num.seqs=5  
 Similarity=0.713333 28 -  
 TGCTAATAAAN-NNNAAAAGT  
 Rev.of\_GCF\_000473245.1\_ASM47324v1\_genomic.fna\_1:2638864-2638944  
 Satlength=81 Nr of Repeats=4 RepeatLength=20 seed=TAGCAACTTT Num.seqs=4  
 Similarity=0.711640 25 -  
 TGCTAGTAAAA-GTGAAAAGT  
 GCF\_000153365.1\_ASM15336v1\_genomic.fna\_17:471750-471850 Satlength=101 Nr  
 of Repeats=5 RepeatLength=20 seed=AGTTGCTAAT Num.seqs=5  
 Similarity=0.733333  
 17 -TGCTAATATAT-GGGGAAAGT  
 Rev.of\_GCF\_000473245.1\_ASM47324v1\_genomic.fna\_1:4055915-4056015  
 Satlength=101 Nr of Repeats=5 RepeatLength=20 seed=TATTAGCAAC Num.seqs=5  
 Similarity=0.733333 28 -  
 TGCTAATATAT-GGGGAAAGT  
 Rev.of\_GCF\_000473245.1\_ASM47324v1\_genomic.fna\_1:647550-648145  
 Satlength=596 Nr of Repeats=11 RepeatLength=20 seed=TATTAGCAAC

Num.seqs=9 Similarity=0.652357  
28 -TGCTAATATAA-ANGAAAAGT

\*\*\*\*\* \*\* \* \*\*\*

Consensus:

TGCTAATAAAanngAAAAGt

>Bacillus\_Fam\_7\_52\_18 Nr. of seq. 18 Alignment length(with gaps) = 60  
Alignment score = 0.620516  
GCF\_000708755.2\_ASM70875v2\_genomic.fna\_1:271081-271444 Satlength=364 Nr  
of Repeats=7 RepeatLength=52 seed=AATCGTACCC Num.seqs=6  
Similarity=0.800000  
0 AATCGTACCCTATAAACTGAGAAACGAATTTAT--AGGGTAAGCAAA--CG--CC-GG-  
GCF\_000709935.2\_ASM70993v2\_genomic.fna\_1:283764-284023 Satlength=260 Nr  
of Repeats=5 RepeatLength=52 seed=AATCGTACCC Num.seqs=4  
Similarity=0.760684  
0 AATCGTACCCTATAAAACCGAAAAACAAATTTAT--AGGGTAAGCAAA--AG--CC-GG-  
GCF\_000708755.2\_ASM70875v2\_genomic.fna\_1:448824-449084 Satlength=261 Nr  
of Repeats=5 RepeatLength=52 seed=CGTACCCTCG Num.seqs=5  
Similarity=0.953846  
2 -AACGTACCCTCGAAAACCGTAAAACG-ATTTGC-GAGGGTAAGCAAAC-AG---G-AGA  
Rev.of\_GCF\_000708755.2\_ASM70875v2\_genomic.fna\_2:874968-875332  
Satlength=365 Nr of Repeats=7 RepeatLength=52 seed=TTGCTTACCC Num.seqs=7  
Similarity=0.824199 44 -  
ATCGTACCCTCGCAAACCGAAAAACG-ATGTGG-GAGGGTAAGCAAG--GC--CG-CGA  
Rev.of\_GCF\_000708755.2\_ASM70875v2\_genomic.fna\_2:926049-926309  
Satlength=261 Nr of Repeats=5 RepeatLength=52 seed=TTGCTTACCC Num.seqs=5  
Similarity=0.825926 44 -  
ATCGTACCCTCGGAAACCGAGAAACG-ATTTGG-GAGGGTAAGCAAG--NG--CG-CGA  
Rev.of\_GCF\_000709935.2\_ASM70993v2\_genomic.fna\_4:181059-181318  
Satlength=260 Nr of Repeats=5 RepeatLength=52 seed=TTGCTTACCC Num.seqs=4  
Similarity=0.856394 44 -  
ATCGTACCCTCGGAAACCGAGAAACG-ATTTGG-GAGGGTAAGCAAG--CG--CG-CGA  
GCF\_000709935.2\_ASM70993v2\_genomic.fna\_24:175334-175594 Satlength=261 Nr  
of Repeats=5 RepeatLength=52 seed=TACCCTCGGA Num.seqs=5  
Similarity=0.877987  
56 -ATCGTACCCTCGGAAACCGAGAAACG-ATCTGG-GAGGGTAAGCAAA--AG--CG-TGA  
GCF\_000709935.2\_ASM70993v2\_genomic.fna\_13:142596-142908 Satlength=313 Nr  
of Repeats=6 RepeatLength=52 seed=GGAATCGTAC Num.seqs=6  
Similarity=0.841026  
49 -ATCGTACCCTGCCAAACCGAAAAACG-ATATGG-GAGGGTAAGCAAG--CG--CC-GGA  
Rev.of\_GCF\_000708755.2\_ASM70875v2\_genomic.fna\_2:1045503-1045815  
Satlength=313 Nr of Repeats=6 RepeatLength=52 seed=TTGCTTACCC Num.seqs=6  
Similarity=0.761934 44 -  
ATCGTACCCTCGTAAACTGTAAAACG-ATCTGG-GAGGGTAAGCAA---AG-NCA-TGA  
Rev.of\_GCF\_000709935.2\_ASM70993v2\_genomic.fna\_4:300377-300585  
Satlength=209 Nr of Repeats=4 RepeatLength=52 seed=TTGCTTACCC Num.seqs=4  
Similarity=0.755241 44 -  
ATCGTACCCTCGTAAACTGTAAAACG-ATCTGG-GAGGGTAAGCAA---AG-TCA-TGA  
Rev.of\_GCF\_000708755.2\_ASM70875v2\_genomic.fna\_2:1167641-1168164  
Satlength=524 Nr of Repeats=8 RepeatLength=52 seed=TTTGCTTACC Num.seqs=5  
Similarity=0.969231 45 -  
ATCGTACCCTCGGAAACTGAGAAACG-ATGTGG-GAGGGTAAGCAA---AG-TGG-TGA

\* \* \* \* \*

Consensus:

```
>Bacillus_Fam_8_52_17 Nr. of seq. 17 Alignment length(with gaps) = 56
Alignment score = 0.680278
GCF_000751775.1_A1A_genomic.fna_10:40891-41880 Satlength=990 Nr of
Repeats=19 RepeatLength=52 seed=GACGACGAGA Num.seqs=18
Similarity=0.730730
25 AAAAGT-GAGTTTCCGCC--AAAAAAN-GACGACGAGAACGGGTCTCGTCGCCAA
GCF_000751775.1_A1A_genomic.fna_20:26659-27491 Satlength=833 Nr of
Repeats=16 RepeatLength=52 seed=TCGTCGCCAA Num.seqs=16
Similarity=0.651343
41 AAAAGG-GGGTTTCCCGTG--CAAAAATG-ACGACGAGAAAGGGTCTCGTCGCCAA
GCF_000751775.1_A1A_genomic.fna_30:19681-20513 Satlength=833 Nr of
Repeats=16 RepeatLength=52 seed=GTCTCGTCGC Num.seqs=14
Similarity=0.737114
90 AAAANG-GAGTTTCCCGCC--CAAAAACG-ACGACGAGAAAGGGTCTCGTCGCCAA
Rev.of_GCF_000751775.1_A1A_genomic.fna_86:16-431 Satlength=416 Nr of
Repeats=8 RepeatLength=52 seed=TTTGGCGACG Num.seqs=7 Similarity=0.832723
52 AAAATG-GAGTTTCCCGCN--CAAAAGTG-ACGACGAGAAGNGGTCTCGTCGCCAA
Rev.of_GCF_000751775.1_A1A_genomic.fna_88:33038-34338 Satlength=1301 Nr
of Repeats=26 RepeatLength=52 seed=TTTTTGGCGA Num.seqs=24
```



Similarity=0.695501 54  
 AAAGTG-GAGTTTTCCGCC--CAAAAATG-ACGACGAGAANGAGTNTCGTCGCCAA  
 Rev.of\_GCF\_000751775.1\_A1A\_genomic.fna\_85:17849-18108 Satlength=260 Nr of  
 Repeats=5 RepeatLength=52 seed=TTTTGGCGAC Num.seqs=4 Similarity=0.727778  
 106 AAAGTG-GAGTTTTCCGNCT-CAAAAATG-ACGACGAGAAGTGGTCTCGTCGCCAA  
 GCF\_000751775.1\_A1A\_genomic.fna\_10:73198-73666 Satlength=469 Nr of  
 Repeats=9 RepeatLength=52 seed=ACGACGAGAA Num.seqs=9 Similarity=0.774217  
 26 AAAATG-AGGTTTTNCGGC-NCAAAAC--GACGACGAGAAGTGGTCTCGTCGCCAA  
 Rev.of\_GCF\_000751775.1\_A1A\_genomic.fna\_22:78517-79089 Satlength=573 Nr of  
 Repeats=11 RepeatLength=52 seed=TTTTTTGGCG Num.seqs=11  
 Similarity=0.773223  
 56 AAAAGG-GAGTTTCTCGGC-TCAAAAT--GACGACGAGAANAGGTCTCGTCGCCAA  
 Rev.of\_GCF\_000751775.1\_A1A\_genomic.fna\_35:49719-50032 Satlength=314 Nr of  
 Repeats=5 RepeatLength=52 seed=CCATTTCTCG Num.seqs=3 Similarity=0.859539  
 92 AAAAAG-GAGTTTCTCGGC-TCAAAAT--GACGACGAGAAATGGCCTCGTCGCCAA  
 Rev.of\_GCF\_000751775.1\_A1A\_genomic.fna\_101:14447-15227 Satlength=781 Nr  
 of Repeats=15 RepeatLength=52 seed=TTTTTGCGCA Num.seqs=15  
 Similarity=0.743563 107  
 AAAANG-GAGTTTTTCGCC-TCAAAAT--GNCGACGAGAANGGGTCTCGTCGCCAA  
 Rev.of\_GCF\_000751775.1\_A1A\_genomic.fna\_26:642-1369 Satlength=728 Nr of  
 Repeats=14 RepeatLength=52 seed=TCTCGTCACC Num.seqs=13  
 Similarity=0.674451  
 87 AAAATN-GAGTTTCTCGCC-TCAAAAT--GGTGACGAGATCAGGNCTCGTCGCCAA  
 Rev.of\_GCF\_000751775.1\_A1A\_genomic.fna\_65:14846-15626 Satlength=781 Nr of  
 Repeats=15 RepeatLength=52 seed=TTCTCGTCAC Num.seqs=15  
 Similarity=0.727883  
 88 AAAAGA-GNGTTTTNCGGC-TCAAAAT--GGTGACGAGAANGGGTCTCGTCGTCAA  
 GCF\_000751775.1\_A1A\_genomic.fna\_77:13214-13941 Satlength=728 Nr of  
 Repeats=13 RepeatLength=52 seed=AAAATGGTGA Num.seqs=12  
 Similarity=0.764371  
 124 AAAATG-GGGTTTTCCGGC-TCAAAAT--GGTGACGAGAATAGGTTTCGTGTCAA  
 Rev.of\_GCF\_000751775.1\_A1A\_genomic.fna\_83:74740-75571 Satlength=832 Nr of  
 Repeats=16 RepeatLength=52 seed=CATTCTCGTC Num.seqs=15  
 Similarity=0.748847  
 142 AAAATG-GGGTTTTCCGGC-TCAAAAT--GGTGACGAGAATGGGTTTCGTGCCAA  
 GCF\_000751775.1\_A1A\_genomic.fna\_65:50685-51777 Satlength=1093 Nr of  
 Repeats=21 RepeatLength=52 seed=GTCGCCAAAA Num.seqs=21  
 Similarity=0.668548  
 96 AAAANG-GNGTTTTTCGAC-TCAAAAC--GGTGACGAGAATTGGTCTCGTCGCCAA  
 Rev.of\_GCF\_000751775.1\_A1A\_genomic.fna\_47:1465-1879 Satlength=415 Nr of  
 Repeats=8 RepeatLength=52 seed=TTTTGGCGAC Num.seqs=6 Similarity=0.677183  
 54 AAAAGC-AAGTTTTTCGGC-TTAAAT--GGCGACGAGAACGGGGTTCGTGCCAA  
 Rev.of\_GCF\_000751775.1\_A1A\_genomic.fna\_27:14100-14724 Satlength=625 Nr of  
 Repeats=12 RepeatLength=52 seed=TTTTGGCGAC Num.seqs=12  
 Similarity=0.702525  
 53 AATATGAGANTTTT-CGAC--CAAAAACG-GTGACGAGAACAGGTTTCGTGCCAA

\*\*\*\*\* \* \*\*\*\*\* \*\*\*\*\* \*\*\* \* \*\*\*\*\*  
 Consensus:

gacGACGAGAAnnGGTcTCGTGCCAAAAAngGaGTTTtnCGnCcAAAAAn

>Bacillus\_Fam\_9\_52\_16 Nr. of seq. 16 Alignment length(with gaps) = 60  
 Alignment score = 0.601759

GCF\_000292245.2\_ASM29224v2\_genomic.fna\_7:40548-40756 Satlength=209 Nr of  
 Repeats=4 RepeatLength=52 seed=CTTTGATTCC Num.seqs=4 Similarity=0.764403  
 0 ---CTTTGATTCCCTTT-ACGGCTCTTATTCAATCGCTTTTGAAATCATT--GAC-AGG-  
 Rev.of\_GCF\_000292245.2\_ASM29224v2\_genomic.fna\_82:9184-9652 Satlength=469  
 Nr of Repeats=9 RepeatLength=52 seed=AATCAAAGGC Num.seqs=9  
 Similarity=0.915954 8  
 ---CTTTGATTCCCTTT-CTGGCTCTGATTGATGGCTTCTGGCTTCATT--GAC-AGC-  
 GCF\_000292245.2\_ASM29224v2\_genomic.fna\_91:13346-13554 Satlength=209 Nr of  
 Repeats=4 RepeatLength=52 seed=TGATTCCCTT Num.seqs=4 Similarity=0.751048  
 3 ---CTTTGATTCCCTTT-CCGACTTTTATTCAATGGCTTTCGGACTCATT--GAC--GCT  
 Rev.of\_GCF\_000292245.2\_ASM29224v2\_genomic.fna\_38:13764-14076  
 Satlength=313 Nr of Repeats=6 RepeatLength=52 seed=AAAGGGAATC Num.seqs=6  
 Similarity=0.713939 14  
 C---TTTGATTCCCTTT-NCGGCTTTGATTTGATGGCTTTTGGTTTCATTG-G-C-TGG-  
 Rev.of\_GCF\_000292245.2\_ASM29224v2\_genomic.fna\_38:24849-25109  
 Satlength=261 Nr of Repeats=5 RepeatLength=52 seed=CAATGAATCC Num.seqs=5  
 Similarity=0.753086 47  
 CT-CTTTGATTCCCTTT-GAGGCTTTTATTTGATGGCTTTCGGATTCATT--G---GGG-  
 Rev.of\_GCF\_000292245.2\_ASM29224v2\_genomic.fna\_38:34016-34224  
 Satlength=209 Nr of Repeats=4 RepeatLength=52 seed=CAAAGGGAAT Num.seqs=4  
 Similarity=0.901709 67  
 C--CTTTGATTCCCTTT-GCGGCTTTTATTTGCTGGCTTTTGGCTTCATT--G-C-GGG-  
 Rev.of\_GCF\_000292245.2\_ASM29224v2\_genomic.fna\_38:38220-38584  
 Satlength=365 Nr of Repeats=8 RepeatLength=52 seed=GAATCAAAGG Num.seqs=6  
 Similarity=0.846541 113  
 C--CTTTGATTCCCTTT-GCGGCTTTTATTTGATGGCTTTCGGCTTCATT--G-C-TGG-  
 GCF\_000292245.2\_ASM29224v2\_genomic.fna\_41:5487-5747 Satlength=261 Nr of  
 Repeats=5 RepeatLength=52 seed=CTTTGATTCC Num.seqs=5 Similarity=0.666667  
 104 C--CTTTGATTCCCTTT-CCGGCTTTTATTGATGGCTTCGGGCTTCATT--G-C-GGG-  
 GCF\_000292245.2\_ASM29224v2\_genomic.fna\_84:3892-4206 Satlength=315 Nr of  
 Repeats=6 RepeatLength=52 seed=TTTGATTCCC Num.seqs=4 Similarity=0.746399  
 53 C--CTTTGATTCCCTTT-CCGGCTTTGATTCAACGGCTTCCGGATTCATT--G-C-GGG-  
 GCF\_000292245.2\_ASM29224v2\_genomic.fna\_10:69101-69413 Satlength=313 Nr of  
 Repeats=6 RepeatLength=52 seed=TATGATTCCC Num.seqs=6 Similarity=0.775354  
 1 C---TATGATTCCCTTT-GCAGCTCTGATTGATGCTTTTGACATCATT-CG-AGCT--  
 GCF\_000292245.2\_ASM29224v2\_genomic.fna\_126:27-495 Satlength=469 Nr of  
 Repeats=9 RepeatLength=52 seed=CTCTGATTCA Num.seqs=9 Similarity=0.782492  
 18 C-CCTATGATTCCCTTTGGCA-CTCTGATTGATGCTTTTGGCATCATT--G-A-CT--  
 Rev.of\_GCF\_000292245.2\_ASM29224v2\_genomic.fna\_31:24471-25040  
 Satlength=570 Nr of Repeats=11 RepeatLength=52 seed=AAGGGAATCA  
 Num.seqs=9 Similarity=0.793447  
 13 C-CCTTTGATTCCCTTT-GCGGCTTTTATTCATATGCTTTAGGAATCATT--G-G-CG--  
 GCF\_000292245.2\_ASM29224v2\_genomic.fna\_77:841-1153 Satlength=313 Nr of  
 Repeats=7 RepeatLength=52 seed=TGATTCCCTT Num.seqs=5 Similarity=0.841026  
 55 C-CCTATGATTCCCTTT-GCGGCTCTTATTCATATGCTTTTGGCATCATT--G-A-CG--  
 GCF\_000292245.2\_ASM29224v2\_genomic.fna\_92:15221-15533 Satlength=313 Nr of  
 Repeats=6 RepeatLength=52 seed=CTCTATGATT Num.seqs=6 Similarity=0.863248  
 50 C-TCTATGATTCCCTTT-CTGGCTTTGATTCACCGGCTTTTGACATCATT--G-C-GG--  
 Rev.of\_GCF\_000292245.2\_ASM29224v2\_genomic.fna\_171:47-724 Satlength=678 Nr  
 of Repeats=13 RepeatLength=52 seed=AAAGGGAATC Num.seqs=12  
 Similarity=0.761673 66  
 C-TCTATGATTCCCTTT-CTGGCTTTGATTCACCGGCTTTTGACATCATT--G-C-GG--  
 Rev.of\_GCF\_000292245.2\_ASM29224v2\_genomic.fna\_106:11691-12195  
 Satlength=505 Nr of Repeats=8 RepeatLength=52 seed=GAAAGGGAAT Num.seqs=7

Similarity=0.843965

67

C-TCTATGATTCCTTTT-CCGGCTTTAATTCACTGGCTTTTGACATCATT--G-C-NG--

\* \*\*\*\*\* \*\* \* \*\*\* \*\*\*\*\* \*

Consensus:

CCTtTGATTCCTTTTncGGCTtTtATTcaatgGCTTTtGgcaTCATTGcnGn

>Bacillus\_Fam\_10\_20\_16 Nr. of seq. 16 Alignment length(with gaps) = 22

Alignment score = 0.662626

GCF\_000934845.1\_ASM93484v1\_genomic.fna\_170:34797-34878 Satlength=82 Nr of Repeats=4 RepeatLength=20 seed=TCGCCAATAA Num.seqs=3 Similarity=0.528889

0 TCGCCAATAAAA-NAAATT-T-

Rev.of\_GCF\_001315165.1\_ASM131516v1\_genomic.fna\_41:14151-14232

Satlength=82 Nr of Repeats=4 RepeatLength=20 seed=TTTATTGGCG Num.seqs=3 Similarity=0.514493 11

TCGCCAATAAAA-TCATTT-T-

Rev.of\_GCF\_000813125.1\_ASM81312v1\_genomic.fna\_75:42581-42683

Satlength=103 Nr of Repeats=5 RepeatLength=20 seed=TTATTGGCGA Num.seqs=3 Similarity=0.733333 10

TCGCCAATAAAAATTATATT-T-

GCF\_001315165.1\_ASM131516v1\_genomic.fna\_6:81809-81911 Satlength=103 Nr of Repeats=5 RepeatLength=20 seed=CGCCAATAAA Num.seqs=3 Similarity=0.688889

21 TCGCCAATAAAAATTAAATT-T-

Rev.of\_GCF\_000934845.1\_ASM93484v1\_genomic.fna\_207:5245-5347 Satlength=103 Nr of Repeats=5 RepeatLength=20 seed=TTTATTGGCG Num.seqs=3 Similarity=0.688889 11

TCGCCAATAAAAATTTATT-T-

GCF\_001315165.1\_ASM131516v1\_genomic.fna\_3:16512-16593 Satlength=82 Nr of Repeats=4 RepeatLength=20 seed=TCGCCAATAA Num.seqs=3 Similarity=0.711111

20 TCGCCAATAAAAATTTNATT-T-

Rev.of\_GCF\_000813125.1\_ASM81312v1\_genomic.fna\_100:28725-28826

Satlength=102 Nr of Repeats=5 RepeatLength=20 seed=TTATTGGCGA Num.seqs=4 Similarity=0.788889 10

TCGCCAATAAAAATTGGATT-T-

Rev.of\_GCF\_000934845.1\_ASM93484v1\_genomic.fna\_140:1784-1886 Satlength=103 Nr of Repeats=5 RepeatLength=20 seed=TTATTGGCGA Num.seqs=3 Similarity=0.714286 10

TCGCCAATAAAAATAAATT-T-

Rev.of\_GCF\_000813125.1\_ASM81312v1\_genomic.fna\_129:61647-61728

Satlength=82 Nr of Repeats=4 RepeatLength=20 seed=TTTATTGGCG Num.seqs=3 Similarity=0.711111 11

TCGCCAATAAAAANNANATT-T-

Rev.of\_GCF\_000934845.1\_ASM93484v1\_genomic.fna\_68:88019-88120

Satlength=102 Nr of Repeats=4 RepeatLength=20 seed=TATTGGCGAA Num.seqs=3 Similarity=0.714286 29

TCGCCAATANAATTTTNTT-T-

Rev.of\_GCF\_000813125.1\_ASM81312v1\_genomic.fna\_100:19594-19675

Satlength=82 Nr of Repeats=4 RepeatLength=20 seed=TTTATTGGCG Num.seqs=3 Similarity=0.688889 10

-CGCCAATAAATCATAATAT-

GCF\_001315165.1\_ASM131516v1\_genomic.fna\_22:40668-40770 Satlength=103 Nr of Repeats=5 RepeatLength=20 seed=CGCCAATAAA Num.seqs=3

Similarity=0.711111  
 20 -CGCCAATAAAAANATATTAT-  
 GCF\_001315165.1\_ASM131516v1\_genomic.fna\_3:41031-41132 Satlength=102 Nr of  
 Repeats=5 RepeatLength=20 seed=CGCCAATAAA Num.seqs=4 Similarity=0.722222  
 20 -CGCCAATAAAATGAAATTAT-  
 Rev.of\_GCF\_001315165.1\_ASM131516v1\_genomic.fna\_16:12683-12764  
 Satlength=82 Nr of Repeats=4 RepeatLength=20 seed=TTTATTGGCG Num.seqs=3  
 Similarity=0.656566 30  
 -CGCCAATAAANTNAAANTAT-  
 Rev.of\_GCF\_000813125.1\_ASM81312v1\_genomic.fna\_98:38828-38909 Satlength=82  
 Nr of Repeats=4 RepeatLength=20 seed=TTTATTGGCG Num.seqs=3  
 Similarity=0.777778 11  
 TCGCCAATAAAAATCGA-T-TA  
 GCF\_000813125.1\_ASM81312v1\_genomic.fna\_51:14452-14553 Satlength=102 Nr of  
 Repeats=5 RepeatLength=20 seed=TCGCCAATAA Num.seqs=4 Similarity=0.487778  
 21 TCGCCAATAAAAATCGATT-TN

\*\*\*\*\* \* \* \*

Consensus:

tCGCCAATAAAAAttanATTT

>Bacillus\_Fam\_11\_51\_15 Nr. of seq. 15 Alignment length(with gaps) = 56  
 Alignment score = 0.625454  
 GCF\_000292245.2\_ASM29224v2\_genomic.fna\_2:54137-54392 Satlength=256 Nr of  
 Repeats=5 RepeatLength=51 seed=TTTTTCATTAC Num.seqs=5 Similarity=0.691667  
 0 TTTTCATTACCTATT-ANC--ATTTATTCGCACCCTAAT-TCCTCACACCCGNN-  
 GCF\_000292245.2\_ASM29224v2\_genomic.fna\_8:10287-10542 Satlength=256 Nr of  
 Repeats=5 RepeatLength=51 seed=TTTTTCATTAC Num.seqs=5 Similarity=0.717284  
 0 TTTTCATTACCTATT-AAC--NGTGATTTCGCACCGTAAT-CNCTCACAGCACGGG-  
 GCF\_000292245.2\_ASM29224v2\_genomic.fna\_2:95942-96554 Satlength=613 Nr of  
 Repeats=12 RepeatLength=51 seed=TTTCATTACC Num.seqs=12  
 Similarity=0.821747  
 1 TTTTCATTACCTATT-ACC--GTTTATTCGCACCGTAAT-TCCGA-CAACNCGGCT  
 GCF\_000292245.2\_ASM29224v2\_genomic.fna\_84:12497-12803 Satlength=307 Nr of  
 Repeats=6 RepeatLength=51 seed=CTTTTCATT Num.seqs=6 Similarity=0.706080  
 49 TTTTCATTACCTATT-ACC--AATTTTTCGCACCCTAAT-CCGGC-CAACTCNGCT  
 GCF\_000292245.2\_ASM29224v2\_genomic.fna\_105:6378-7343 Satlength=966 Nr of  
 Repeats=18 RepeatLength=51 seed=TTTCATTACC Num.seqs=14  
 Similarity=0.681019  
 1 TTTTCATTACCTATT-CANC--ATTATTCGCACCTTAATCTCCG--CAACTCGGCT  
 GCF\_000292245.2\_ASM29224v2\_genomic.fna\_3:26666-27023 Satlength=358 Nr of  
 Repeats=7 RepeatLength=51 seed=TCATTACCTA Num.seqs=7 Similarity=0.625037  
 3 TTTTCATTACCTATT--CC-NGTTTTTTCGCACCCAAATC-CGNCACAGCTCGGC-  
 GCF\_000292245.2\_ASM29224v2\_genomic.fna\_133:14-269 Satlength=256 Nr of  
 Repeats=5 RepeatLength=51 seed=TTTTTCATTAC Num.seqs=5 Similarity=0.639766  
 51 TTTTCATTACCTATT--CC-TGTTTATTCGCACCCTAATCTCTT-ACAGCACGGC-  
 GCF\_000292245.2\_ASM29224v2\_genomic.fna\_43:36326-36680 Satlength=355 Nr of  
 Repeats=7 RepeatLength=51 seed=TTTTTCATTAC Num.seqs=6 Similarity=0.790598  
 51 TTTTCATTACCTATT--CC-TGNTTATTCGCACCCTAATNTCTTCACAGCACGGC-  
 Rev.of\_GCF\_000292245.2\_ASM29224v2\_genomic.fna\_59:24274-24682  
 Satlength=409 Nr of Repeats=8 RepeatLength=51 seed=GGTTCGAAAA Num.seqs=8  
 Similarity=0.909430 31  
 TTTTCATTACCTATT--CA-AGTTTTTTTCGAACCCTAAT-TCTTAACACCTCGGC-

GCF\_000292245.2\_ASM29224v2\_genomic.fna\_5:34399-34863 Satlength=465 Nr of Repeats=9 RepeatLength=51 seed=TTTCGACCCCT Num.seqs=7 Similarity=0.833639  
 23 TTTTCATTACTTATC--CC-GCTTTATTTCGCACCCTAAT-TTGACTCAGCTCGGC-  
 GCF\_000292245.2\_ASM29224v2\_genomic.fna\_20:40449-40806 Satlength=358 Nr of Repeats=7 RepeatLength=51 seed=ATTTCGACCC Num.seqs=7 Similarity=0.788260  
 73 TTTTCATTACCTATC--CC-GCTCAATTTCGCACCCTAAT-TTGACTCAGCACCGC-  
 Rev.of\_GCF\_000292245.2\_ASM29224v2\_genomic.fna\_26:8-518 Satlength=511 Nr of Repeats=10 RepeatLength=51 seed=GTAATGAAAA Num.seqs=10  
 Similarity=0.770940 61  
 TTTTCATTACTTATT--CC-AGTTTATTTCGCACCCTAAT-TTGGCACTGCTCGGC-  
 Rev.of\_GCF\_000292245.2\_ASM29224v2\_genomic.fna\_139:4619-4975 Satlength=357  
 Nr of Repeats=7 RepeatLength=51 seed=GTAATGAAAA Num.seqs=6  
 Similarity=0.788889 61  
 TTTTCATTACTTATC--CC-AGTTTATTTCGCACTCTAAT-TTGGCACTGCACAGC-  
 GCF\_000292245.2\_ASM29224v2\_genomic.fna\_42:17059-17365 Satlength=307 Nr of Repeats=6 RepeatLength=51 seed=TTTTTCGCAC Num.seqs=6 Similarity=0.814675  
 70 TTTTCATTACTTATT--CCAGCTTTT-TCGCACCGTAAT-CTGACTCAGCACGGT-  
 GCF\_000292245.2\_ASM29224v2\_genomic.fna\_8:67209-67464 Satlength=256 Nr of Repeats=5 RepeatLength=51 seed=TTTTCATTAC Num.seqs=5 Similarity=0.824837  
 51 TTTTCATTACCAATT--CC-CTTTTATTTCGCACCNATAAT-TTCTCGCAGCACCGC-

\*\*\*\*\* \*\* \*\*\* \*\* \* \* \*

Consensus:

TTTTCATTACcTATtcCnntTTaTTCGCACCcTAATtcnncaCAgCnCcGc

>Bacillus\_Fam\_12\_52\_15 Nr. of seq. 15 Alignment length(with gaps) = 54  
 Alignment score = 0.703939  
 GCF\_000751775.1\_A1A\_genomic.fna\_10:11861-12903 Satlength=1043 Nr of Repeats=20 RepeatLength=52 seed=TTTTGACGAC Num.seqs=18  
 Similarity=0.678447  
 0 TTTTGACGACGAAA-CGCATTCTCGTCACCATTTTGAGGTGAAAAACGC-TCAA  
 GCF\_000751775.1\_A1A\_genomic.fna\_21:16757-17329 Satlength=573 Nr of Repeats=11 RepeatLength=52 seed=TCTCGTCACC Num.seqs=11  
 Similarity=0.696398  
 19 TTTTGACGACGAGA-TCTAATCTCGTCACCATTTTGAGGTGGGAAATGC-TCAA  
 GCF\_000751775.1\_A1A\_genomic.fna\_10:2556-2815 Satlength=260 Nr of Repeats=5 RepeatLength=52 seed=TCTCGTCACC Num.seqs=4 Similarity=0.633230  
 20 TTTTGACGACGAAATCCTATTCTCGTCACCAATTTGAGGCGAGAAACAC-CCAA  
 GCF\_000751775.1\_A1A\_genomic.fna\_35:77020-77852 Satlength=833 Nr of Repeats=16 RepeatLength=52 seed=TTTTGGCGAC Num.seqs=14  
 Similarity=0.698921  
 0 TTTTGGCGACGAGC-CCCGTTCTCGTCGTCATTTTGAGGTGAGAAATGC-TCAA  
 Rev.of\_GCF\_000751775.1\_A1A\_genomic.fna\_42:1584-2449 Satlength=866 Nr of Repeats=17 RepeatLength=52 seed=GTGACGAGAA Num.seqs=13  
 Similarity=0.799803  
 28 TTTTGGCGACGAGA-CCCGTTCTCGTCACCATTTTGAGGTGAAAAATNC-TCGT  
 Rev.of\_GCF\_000751775.1\_A1A\_genomic.fna\_42:28877-29449 Satlength=573 Nr of Repeats=10 RepeatLength=52 seed=AAAATGGTGA Num.seqs=9  
 Similarity=0.760631  
 34 TTTTGGCGACGAGA-CCNNTTCTCGTCACCATTTTGAGGCGNGAAATGC-TCTT  
 GCF\_000751775.1\_A1A\_genomic.fna\_70:5639-6159 Satlength=521 Nr of Repeats=9 RepeatLength=52 seed=CTCGTCACCA Num.seqs=8 Similarity=0.803792  
 72 TTTTGGCGACGAGA-CCCTTTCTCGTCACCATTTTGGGGCGAAAATGC-TCGA

\*\*\*\*\* \* \* \* \* \* \* \* \* \* \*

Consensus:

```

>Bacillus_Fam_13_21_15 Nr. of seq. 15 Alignment length(with gaps) = 24
Alignment score = 0.642196
GCF_900111815.1_PRJEB17078_genomic.fna_1:83842-84237 Satlength=396 Nr of
Repeats=7 RepeatLength=21 seed=TTACCGTAGA Num.seqs=6 Similarity=0.679798
0 TTACCGTAGATA-AAAGGCNG--T
GCF_900111815.1_PRJEB17078_genomic.fna_9:3907-4741 Satlength=835 Nr of
Repeats=11 RepeatLength=21 seed=TTACCGTAGA Num.seqs=9
Similarity=0.742504
0 TTACCGTAGATA-AATGGTGG--T
Rev.of_GCF_900111815.1_PRJEB17078_genomic.fna_1:368287-368371
Satlength=85 Nr of Repeats=4 RepeatLength=21 seed=TATCTACGGT Num.seqs=4
Similarity=0.642677 12
TTACCGTAGATA-AATNGACG--T
GCF_900111815.1_PRJEB17078_genomic.fna_1:2689763-2690346 Satlength=584 Nr
of Repeats=5 RepeatLength=21 seed=TTTACCGTAG Num.seqs=3
Similarity=0.873016 20
TTACCGTAGATA-AATTGCCG--T
Rev.of_GCF_900111815.1_PRJEB17078_genomic.fna_1:2705984-2706732
Satlength=749 Nr of Repeats=12 RepeatLength=21 seed=TATCTACGGT

```

Num.seqs=10 Similarity=0.714654  
33 TTACCGTAGATA-AATTGCCG--T  
GCF\_900111815.1\_PRJEB17078\_genomic.fna\_1:541624-541708 Satlength=85 Nr of  
Repeats=4 RepeatLength=21 seed=TTACCGTAGA Num.seqs=4 Similarity=0.642361  
21 TTACCGTAGATA-AATTGCAG--N  
GCF\_900111815.1\_PRJEB17078\_genomic.fna\_1:397204-397592 Satlength=389 Nr  
of Repeats=7 RepeatLength=21 seed=TTACCGTAGA Num.seqs=6  
Similarity=0.716162  
0 TTACCGTAGATA-AANTGNCGA-T  
Rev.of\_GCF\_900111815.1\_PRJEB17078\_genomic.fna\_1:2954420-2954813  
Satlength=394 Nr of Repeats=7 RepeatLength=21 seed=TATCTACGGT Num.seqs=6  
Similarity=0.708081 11 -  
TACCGTAGATA-AATGGAGN-AT  
Rev.of\_GCF\_900111815.1\_PRJEB17078\_genomic.fna\_1:136654-137062  
Satlength=409 Nr of Repeats=8 RepeatLength=21 seed=TATCAACGGT Num.seqs=7  
Similarity=0.645503 12  
TTACCGTTGATA-AATCGCNG--T  
Rev.of\_GCF\_900111815.1\_PRJEB17078\_genomic.fna\_1:2902508-2902991  
Satlength=484 Nr of Repeats=7 RepeatLength=21 seed=TATCAACGGT Num.seqs=6  
Similarity=0.631313 12  
TTACCGTTGATA-AATGGCNA--T  
Rev.of\_GCF\_900111815.1\_PRJEB17078\_genomic.fna\_1:2906204-2907642  
Satlength=1439 Nr of Repeats=21 RepeatLength=21 seed=TATCTACGGT  
Num.seqs=13 Similarity=0.791616  
12 TTACCGTAGATA-AATCGCNA--T  
GCF\_900111815.1\_PRJEB17078\_genomic.fna\_1:2936585-2937431 Satlength=847 Nr  
of Repeats=11 RepeatLength=21 seed=TTACCGTTGA Num.seqs=8  
Similarity=0.767587 21  
TTACCGTAGATA-AATCGTGA--T  
GCF\_900111815.1\_PRJEB17078\_genomic.fna\_1:80313-80667 Satlength=355 Nr of  
Repeats=5 RepeatLength=21 seed=TTACCGTTGA Num.seqs=4 Similarity=0.664251  
22 TTACCGTTGATAAAATGGCTG--A  
GCF\_900111815.1\_PRJEB17078\_genomic.fna\_1:2407942-2408247 Satlength=306 Nr  
of Repeats=4 RepeatLength=21 seed=TTACCGTTGA Num.seqs=3  
Similarity=0.666667 21  
TTACCGTTGATA-AATGNNCA--N  
GCF\_900111815.1\_PRJEB17078\_genomic.fna\_11:38238-39212 Satlength=975 Nr of  
Repeats=13 RepeatLength=21 seed=TTACCGTTGA Num.seqs=10  
Similarity=0.709428  
21 TTACCGTTGATA-AATGNNGA--N

\*\*\*\*\* \*\*\*\* \*\*

Consensus:

TTACCGTaGATAAAATnGcngt

>Bacillus\_Fam\_14\_21\_15 Nr. of seq. 15 Alignment length(with gaps) = 23  
Alignment score = 0.651484  
GCF\_001889165.1\_ASM188916v1\_genomic.fna\_1:21005-21172 Satlength=168 Nr of  
Repeats=8 RepeatLength=21 seed=AATCGCGGAT Num.seqs=7 Similarity=0.782828  
0 AATCGCGGAT-A-GAGCCCGGAA  
GCF\_001889165.1\_ASM188916v1\_genomic.fna\_1:25511-25700 Satlength=190 Nr of  
Repeats=9 RepeatLength=21 seed=CGGATAGAGC Num.seqs=9 Similarity=0.873016  
5 AATCGCGGAT-A-GAGCACTGAA

Rev.of\_GCF\_001889165.1\_ASM188916v1\_genomic.fna\_1:3155990-3156777  
 Satlength=788 Nr of Repeats=15 RepeatLength=21 seed=TCCGCGATTT  
 Num.seqs=10 Similarity=0.732323  
 9 AATCGCGGAT-A-GAGCGCCGAA  
 GCF\_001889165.1\_ASM188916v1\_genomic.fna\_1:497918-498023 Satlength=106 Nr  
 of Repeats=5 RepeatLength=21 seed=AATCGCGGAT Num.seqs=5  
 Similarity=0.875758  
 0 AATCGCGGAT-A-GAGGGCTGAA  
 Rev.of\_GCF\_001889165.1\_ASM188916v1\_genomic.fna\_1:2579124-2579418  
 Satlength=295 Nr of Repeats=14 RepeatLength=21 seed=TATCCGCGAT  
 Num.seqs=14 Similarity=0.806035  
 11 AATCGCGGAT-A-GAGCGCTCAG  
 Rev.of\_GCF\_001889165.1\_ASM188916v1\_genomic.fna\_1:3277057-3277141  
 Satlength=85 Nr of Repeats=4 RepeatLength=21 seed=TATCCGCGAT Num.seqs=4  
 Similarity=0.666667 11  
 AATCGCGGATAA-GAGCGGTGAT  
 Rev.of\_GCF\_001889165.1\_ASM188916v1\_genomic.fna\_1:790108-790234  
 Satlength=127 Nr of Repeats=6 RepeatLength=21 seed=TATCCGCGAT Num.seqs=6  
 Similarity=0.817989 11  
 AATCGCGGAT-A-CAGCACCTAT  
 Rev.of\_GCF\_001889165.1\_ASM188916v1\_genomic.fna\_1:2862732-2862858  
 Satlength=127 Nr of Repeats=6 RepeatLength=21 seed=CTATCCGCGA Num.seqs=6  
 Similarity=0.713636 11  
 AATCGCGGAT-AGCAGCATGTAT  
 GCF\_001889165.1\_ASM188916v1\_genomic.fna\_1:29979-30084 Satlength=106 Nr of  
 Repeats=5 RepeatLength=21 seed=AATCGCGGAT Num.seqs=5 Similarity=0.701515  
 0 AATCGCGGAT-A-GACGNACCAG  
 GCF\_001889165.1\_ASM188916v1\_genomic.fna\_1:757325-757823 Satlength=499 Nr  
 of Repeats=14 RepeatLength=21 seed=AATCGCGGAT Num.seqs=13  
 Similarity=0.655147 0  
 AATCGCGGAT-A-GAAGCCCCAA  
 GCF\_001889165.1\_ASM188916v1\_genomic.fna\_1:3362340-3362445 Satlength=106  
 Nr of Repeats=5 RepeatLength=21 seed=ATCGCGGATA Num.seqs=5  
 Similarity=0.847619 1  
 AATCGCGGAT-A-GAACCCCAT  
 GCF\_001889165.1\_ASM188916v1\_genomic.fna\_1:4295617-4296096 Satlength=480  
 Nr of Repeats=10 RepeatLength=21 seed=AATCGCGGAT Num.seqs=8  
 Similarity=0.577877 0  
 AATCGCGGAT-A-GAGGNCCNAT  
 GCF\_001889165.1\_ASM188916v1\_genomic.fna\_1:802803-802887 Satlength=85 Nr  
 of Repeats=4 RepeatLength=21 seed=AATCGCGGAT Num.seqs=4  
 Similarity=0.767196  
 0 AATCGCGGAT-A-GAGCATCCAA  
 GCF\_001889165.1\_ASM188916v1\_genomic.fna\_1:3702467-3702782 Satlength=316  
 Nr of Repeats=15 RepeatLength=21 seed=ATCGCGGATA Num.seqs=15  
 Similarity=0.860922 1  
 AATCGCGGAT-A-GAGCACCCAC  
 GCF\_001889165.1\_ASM188916v1\_genomic.fna\_1:2986923-2987175 Satlength=253  
 Nr of Repeats=12 RepeatLength=21 seed=ATCGCGGATA Num.seqs=12  
 Similarity=0.785474 1  
 AATCGCGGAT-A-GAGCNCCCTT

\*\*\*\*\* \* \*

Consensus:



AATCGCGGATAGAgcncnAn

>Bacillus\_Fam\_15\_52\_14 Nr. of seq. 14 Alignment length(with gaps) = 54  
Alignment score = 0.680301  
GCF\_000374345.1\_ASM37434v1\_genomic.fna\_44:21064-21532 Satlength=469 Nr of  
Repeats=9 RepeatLength=52 seed=ATGAACGCC Num.seqs=9 Similarity=0.580460  
0 ATGAACGCCCGCAGCACGGATTTT-NTNCCGGCACGGTCTTTCATACC-CNT-  
GCF\_000374345.1\_ASM37434v1\_genomic.fna\_5:37937-38145 Satlength=209 Nr of  
Repeats=4 RepeatLength=52 seed=GGCTTTCATT Num.seqs=4 Similarity=0.803419  
36 ATGAACGACCACGGGCACGGGTTTT-CCACGGGAACGGGCTTTCATTCCCCTT-  
GCF\_000374345.1\_ASM37434v1\_genomic.fna\_22:25197-25509 Satlength=313 Nr of  
Repeats=6 RepeatLength=52 seed=ATGAACGACC Num.seqs=6 Similarity=0.724109  
52 ATGAACGACCATGGGCGCGGCTTTT-TCTTGGGAACGGGCATTCATTCGCCGT-  
Rev.of\_GCF\_000374345.1\_ASM37434v1\_genomic.fna\_9:32790-34036  
Satlength=1247 Nr of Repeats=24 RepeatLength=52 seed=GGTCGTTCAT  
Num.seqs=20 Similarity=0.767414  
62 ATGAACGACCGNGCGCGGGTTTTCT-CCGGCACGGGCTTTCATTCTCTCT-  
Rev.of\_GCF\_000374345.1\_ASM37434v1\_genomic.fna\_42:4571-4935 Satlength=365  
Nr of Repeats=7 RepeatLength=52 seed=GAATGAAAGC Num.seqs=7  
Similarity=0.738240 99  
ATGAACGACCGGAAGCGCGGGTTTTACT-CCGGCNTGGGCTTTCATTCCACTT-  
Rev.of\_GCF\_000374345.1\_ASM37434v1\_genomic.fna\_13:64454-65078  
Satlength=625 Nr of Repeats=12 RepeatLength=52 seed=CACGGTCGTT  
Num.seqs=12 Similarity=0.837995  
65 ATGAACGACCGTGGGCGCGGATTTT-CTTCCGGCACGGGCTTTCATTTCCCTT-  
GCF\_000374345.1\_ASM37434v1\_genomic.fna\_29:21895-22466 Satlength=572 Nr of  
Repeats=11 RepeatLength=52 seed=GGGCTTTCAT Num.seqs=10  
Similarity=0.851852  
87 ATGAACGACCGTGGGCGGGGATTTT-CTCCGGCGCGGGCTTTCATTCCCCTT-  
Rev.of\_GCF\_000374345.1\_ASM37434v1\_genomic.fna\_57:9268-10100 Satlength=833  
Nr of Repeats=16 RepeatLength=52 seed=AATGAAAGCC Num.seqs=16  
Similarity=0.831838 98  
ATGAACGACCGCGGGCACGAATTTT-CTTCCGACGCGGGCTTTCATTTCTCTCT-  
Rev.of\_GCF\_000374345.1\_ASM37434v1\_genomic.fna\_43:29468-30092  
Satlength=625 Nr of Repeats=12 RepeatLength=52 seed=GTCGTTCATA  
Num.seqs=12 Similarity=0.758353  
113 ATGAACGACCGCATCATGGTTTTT-CTTCCAGCGCGGGCTTTCATTCCCCTT-  
Rev.of\_GCF\_000374345.1\_ASM37434v1\_genomic.fna\_53:47-463 Satlength=417 Nr  
of Repeats=8 RepeatLength=52 seed=GGTCGTTCAT Num.seqs=8  
Similarity=0.782051  
114 ATGAACGACCGCGCACGTGGGTTTT-CTTCCGCCGCGGGCTTTCATTCCCCTT-  
GCF\_000374345.1\_ASM37434v1\_genomic.fna\_99:27-339 Satlength=313 Nr of  
Repeats=6 RepeatLength=52 seed=CTTATGAACG Num.seqs=6 Similarity=0.769231  
153 ATGAACGACCGCGCACACGGGTTTT-CTCCGCCGCGGGCTTTCATTCCCCTT-  
Rev.of\_GCF\_000374345.1\_ASM37434v1\_genomic.fna\_47:7566-7826 Satlength=261  
Nr of Repeats=5 RepeatLength=52 seed=GGTCGTTCAT Num.seqs=5  
Similarity=0.691358 62  
ATGAACGACCNCGAACNCAGATTTT-CCTCCGTCACGGGCTTTCATTCCACTT-  
Rev.of\_GCF\_000374345.1\_ASM37434v1\_genomic.fna\_8:71582-72050 Satlength=469  
Nr of Repeats=9 RepeatLength=52 seed=ATGAAAGCCC Num.seqs=9  
Similarity=0.760117 45  
ATGAACGACCGGGTGCTGTTTTT-CTTCCGGTGCGGGCTTTCAT-CGCCTTG



Similarity=0.514423 36  
 ATGAGAACCGNAA-NAGGACCAG-NGNTAGGAGGAANCGGTCTTCATAAAGGAG  
 GCF\_900156875.1\_PRJEB18969\_genomic.fna\_11:540121-540433 Satlength=313 Nr  
 of Repeats=6 RepeatLength=52 seed=CGGTCTTCAT Num.seqs=6  
 Similarity=0.841026  
 87 ATGAGAACCGAAA-CAGGATCAG-CGGTAGAAGGAAACGGTCTTCATAAAGGAA  
 GCF\_900156875.1\_PRJEB18969\_genomic.fna\_11:512429-513105 Satlength=677 Nr  
 of Repeats=13 RepeatLength=52 seed=CGGTCTTCAT Num.seqs=11  
 Similarity=0.790744 87  
 ATGAGAACCGATC-CAGGATCAG-TGGAAGCAAGAACCGGTCTTCATAAAGGAG  
 GCF\_900156875.1\_PRJEB18969\_genomic.fna\_11:443658-443970 Satlength=313 Nr  
 of Repeats=6 RepeatLength=52 seed=GACCGAAAGA Num.seqs=6  
 Similarity=0.928205  
 5 ATGAGGACCGAAA-GATGATCAG-GGGAAGCAGAAACCGTCATCATCAAGGGA

\*\*\*\*\* \* \*\* \* \*\*\*\*\*  
 Consensus:

ATGAGAACCGAAAgAGgtccAGcGnaAgcaGgaAaCGGTCTTCATaAagGgg

>Bacillus\_Fam\_17\_12\_14 Nr. of seq. 14 Alignment length(with gaps) = 14  
 Alignment score = 0.607535  
 GCF\_000292245.2\_ASM29224v2\_genomic.fna\_17:22115-22158 Satlength=44 Nr of  
 Repeats=4 RepeatLength=11 seed=TTTTTACTTT Num.seqs=3 Similarity=1.000000  
 0 -TTTTTACTTTC--  
 Rev.of\_GCF\_000290995.1\_Baci\_cere\_AND1407\_G13175\_V1\_genomic.fna\_1:1238234-  
 1238324 Satlength=91 Nr of Repeats=7 RepeatLength=12 seed=AAAGGAAAAG  
 Num.seqs=6 Similarity=1.000000 4 CTTT-T-  
 CCTTTTC  
 Rev.of\_GCF\_000305495.1\_BacPsy2.0\_genomic.fna\_263:11580-11634 Satlength=55  
 Nr of Repeats=4 RepeatLength=12 seed=GAAAAAGAAA Num.seqs=3  
 Similarity=0.925926 12  
 CTTT-T-CTTTTTC  
 GCF\_000299035.1\_ASM29903v1\_genomic.fna\_3:203147-203195 Satlength=49 Nr of  
 Repeats=4 RepeatLength=12 seed=TTTCTTTTTC Num.seqs=4 Similarity=0.888889  
 15 CTTTTT-CTTTTT-  
 GCF\_000712615.1\_ASM71261v1\_genomic.fna\_1:55537-55585 Satlength=49 Nr of  
 Repeats=4 RepeatLength=12 seed=TTCTTTTCT Num.seqs=4 Similarity=0.944444  
 16 CTTTTT-CTTTTT-  
 GCF\_000775975.1\_ASM77597v1\_genomic.fna\_1:5340410-5341236 Satlength=827 Nr  
 of Repeats=6 RepeatLength=12 seed=CTTTTCTTT Num.seqs=4  
 Similarity=0.833333 18  
 CTTTTT-CTTTTT-  
 Rev.of\_GCF\_001439965.1\_ASM143996v1\_genomic.fna\_122:196979-197027  
 Satlength=49 Nr of Repeats=4 RepeatLength=12 seed=AAGAAAAAGA Num.seqs=4  
 Similarity=0.925926 15  
 CTTTTT-CTTTTT-  
 GCF\_000380245.2\_ASM38024v2\_genomic.fna\_8:153502-153556 Satlength=55 Nr of  
 Repeats=4 RepeatLength=12 seed=TTCTTTTCT Num.seqs=3 Similarity=0.925926  
 16 CTTTTT-CTTCTT-  
 Rev.of\_GCF\_001654695.1\_ASM165469v1\_genomic.fna\_2:100746-101358  
 Satlength=613 Nr of Repeats=4 RepeatLength=12 seed=TGAAAAAGAA Num.seqs=3  
 Similarity=1.000000 20  
 CTTTTT-CATATT-

GCF\_900109925.1\_IMG-  
 taxon\_2651870116\_annotated\_assembly\_genomic.fna\_21:131911-131965  
 Satlength=55 Nr of Repeats=4 RepeatLength=12 seed=TTTTCTTTTT Num.seqs=3  
 Similarity=0.925926 20 CTTTTT-CATTTT-  
 GCF\_000430765.1\_ASM43076v1\_genomic.fna\_20:41962-42022 Satlength=61 Nr of  
 Repeats=5 RepeatLength=12 seed=ATCTTTATCT Num.seqs=5 Similarity=1.000000  
 4 CTTTAT-CTTTAT-  
 GCF\_000621445.1\_ASM62144v1\_genomic.fna\_4:61862-61916 Satlength=55 Nr of  
 Repeats=4 RepeatLength=12 seed=TCTTTGTCTT Num.seqs=3 Similarity=0.925926  
 5 CTTTGT-CTTTGT-  
 Rev.of\_GCF\_001315065.1\_ASM131506v1\_genomic.fna\_4:107347-107395  
 Satlength=49 Nr of Repeats=4 RepeatLength=12 seed=AAGGATAAAG Num.seqs=4  
 Similarity=0.925926 4  
 CCTTGT-CTTTAT-  
 GCF\_001591585.1\_ASM159158v1\_genomic.fna\_33:29459-29615 Satlength=157 Nr  
 of Repeats=13 RepeatLength=12 seed=TTCTTTATCT Num.seqs=13  
 Similarity=1.000000 4  
 CTATTT-CTTTAT-

\* \* \* \*

Consensus:

CTTTtTcTtTtT

>Bacillus\_Fam\_18\_52\_13 Nr. of seq. 13 Alignment length(with gaps) = 57  
 Alignment score = 0.612086  
 GCF\_001712755.1\_ASM171275v1\_genomic.fna\_1:340959-341167 Satlength=209 Nr  
 of Repeats=4 RepeatLength=52 seed=GTTTCATGAGT Num.seqs=4  
 Similarity=0.827044  
 0 -GTTTCATGAGTAAGTAAAAAGGAGAA-AAAT-TG--ATTTATAGTAACTCATAGAGA  
 Rev.of\_GCF\_001712755.1\_ASM171275v1\_genomic.fna\_34:211464-211828  
 Satlength=365 Nr of Repeats=6 RepeatLength=52 seed=TTTTACTTAC Num.seqs=5  
 Similarity=0.800000 18 -  
 GTTCATGAGTAAGTAAAAAAGTGAA-AATG-AG--AAATTTAGTAACTCATAGAGG  
 Rev.of\_GCF\_001712755.1\_ASM171275v1\_genomic.fna\_34:282789-283049  
 Satlength=261 Nr of Repeats=5 RepeatLength=52 seed=CTTACTCATG Num.seqs=5  
 Similarity=0.953846 65 -  
 GTTCATGAGTAAGTAAAAAAG-GAA-AAAGAAG--AAATATAGTAACTCATAAAGG  
 GCF\_001712755.1\_ASM171275v1\_genomic.fna\_2:181356-181770 Satlength=415 Nr  
 of Repeats=8 RepeatLength=52 seed=GGTTCATGAG Num.seqs=7  
 Similarity=0.877900  
 0 GGTTCATGAGTAAGTAAAAATG-NAAGAAAT-CG--CGATTTAGTGACTCATA-ATA  
 GCF\_001712755.1\_ASM171275v1\_genomic.fna\_2:298439-299011 Satlength=573 Nr  
 of Repeats=11 RepeatLength=52 seed=TACTCATAAG Num.seqs=11  
 Similarity=0.876457 40  
 -GTTTCATGAGTAAGTAAAATAG-CAA-AAANATG-AAAA-ATGGTTACTCATAAGGA  
 GCF\_001712755.1\_ASM171275v1\_genomic.fna\_33:281199-281458 Satlength=260 Nr  
 of Repeats=5 RepeatLength=52 seed=TTGGTTACTC Num.seqs=4  
 Similarity=0.829060 87  
 -CTTCATGAGTATGTACAAAAG-CAA-AAACATG-ATAA-TTGGTTACTCATAAGGG  
 Rev.of\_GCF\_001712755.1\_ASM171275v1\_genomic.fna\_9:99562-99924  
 Satlength=363 Nr of Repeats=7 RepeatLength=52 seed=GTAAGTTATT Num.seqs=5  
 Similarity=0.958974 43  
 -GTTTCATGAGTAAGTAAAAAAG-CAA-AAAGATG-AAAA-TAACTTACTCATAGGAG

Rev.of\_GCF\_001712755.1\_ASM171275v1\_genomic.fna\_9:90464-91454  
 Satlength=991 Nr of Repeats=5 RepeatLength=52 seed=TTTGCTGTTT Num.seqs=3  
 Similarity=0.888889 77  
 -GTTTCATGAGTAAGTAAAACAG-CAA-AAATAAG-AAAA-AAGGTNCCGCATGAAGG  
 Rev.of\_GCF\_001712755.1\_ASM171275v1\_genomic.fna\_33:181107-181419  
 Satlength=313 Nr of Repeats=6 RepeatLength=52 seed=ACTTACTCAT Num.seqs=6  
 Similarity=0.941880 118 -  
 GTTCATGAGTAAGTAAAACAG-CAA-AAAGAAG-CAAA-TAGGTTACTCATGAGTG  
 GCF\_001712755.1\_ASM171275v1\_genomic.fna\_5:85395-85810 Satlength=416 Nr of  
 Repeats=8 RepeatLength=52 seed=TAATCATAA Num.seqs=7 Similarity=0.934066  
 91 -GTTTCATGAGTAAGTAAAACAG-CGA-GAATCTG--AAACTTAGTAACTCATAAGAG  
 GCF\_001712755.1\_ASM171275v1\_genomic.fna\_11:53806-54274 Satlength=469 Nr  
 of Repeats=9 RepeatLength=52 seed=ATGAGTAAAGT Num.seqs=9  
 Similarity=0.906695  
 108 -GTTTCATGAGTAAGTAAAAGAG-CAN-GAATCCG--AAATATAGTTCCTCATAAAGG  
 GCF\_001712755.1\_ASM171275v1\_genomic.fna\_13:154313-154676 Satlength=364 Nr  
 of Repeats=7 RepeatLength=52 seed=TACTTACTCA Num.seqs=6  
 Similarity=0.928205 140  
 -GCTCATGAGTAAGTAAAACAG-CAA-AAATCAGAGAAA--TACTTACTCATAACAG  
 Rev.of\_GCF\_001712755.1\_ASM171275v1\_genomic.fna\_35:106552-106864  
 Satlength=313 Nr of Repeats=6 RepeatLength=52 seed=ACTTACTCAT Num.seqs=6  
 Similarity=0.886792 170 -  
 GTTCATGAGTAAGTAAAACAG-TAA-AAAGAAG-GAAA-GTACTTACTCATAAAGG

\*\*\*\*\* \*\*\* \*\* \* \* \* \* \*

Consensus:

GTTCATGAGTAAGTAAAAnAGcAAAAAnanGnAAAntagTtACTCATAaagg

>Bacillus\_Fam\_19\_53\_13 Nr. of seq. 13 Alignment length(with gaps) = 57  
 Alignment score = 0.601589  
 GCF\_000708755.2\_ASM70875v2\_genomic.fna\_1:435766-436081 Satlength=316 Nr  
 of Repeats=6 RepeatLength=53 seed=TGCTGCCACT Num.seqs=5  
 Similarity=0.904402  
 0 TGCTGCCACTTTTCATCGGAAG--AGGAACCTCATTTGTGGCGTTATTC--GAGGTAG  
 GCF\_000709935.2\_ASM70993v2\_genomic.fna\_1:450592-450857 Satlength=266 Nr  
 of Repeats=5 RepeatLength=53 seed=TTGTGGCGT Num.seqs=5  
 Similarity=0.924528  
 31 TGCTGCCACTTTTCATCGGAAG--AGGAACCTCATTTGTGGCGTTATTC--GAGGTAG  
 Rev.of\_GCF\_000708755.2\_ASM70875v2\_genomic.fna\_2:1471847-1472112  
 Satlength=266 Nr of Repeats=5 RepeatLength=53 seed=ACCACTCTGG Num.seqs=5  
 Similarity=0.869182 4  
 TGGTACCACTTTTATCGGAAG--TTGATCCACATTAGTGGCGTCATTC--GCCAGAG  
 Rev.of\_GCF\_000709935.2\_ASM70993v2\_genomic.fna\_5:422395-422607  
 Satlength=213 Nr of Repeats=4 RepeatLength=53 seed=GAATGACGCC Num.seqs=4  
 Similarity=0.882600 46  
 TGGTGCCACTTTAATCGGAAG--TTGATCCACATTGTGGCGTCATTC--TCCAGAG  
 GCF\_000709935.2\_ASM70993v2\_genomic.fna\_15:156751-157015 Satlength=265 Nr  
 of Repeats=5 RepeatLength=53 seed=CTCATTTGTG Num.seqs=4  
 Similarity=0.899371  
 27 TGCTGCCACTTTTATCTGAGG--TGAATCCTCATTTGTGGCGCCATTC--GCCCCGAG  
 Rev.of\_GCF\_000708755.2\_ASM70875v2\_genomic.fna\_6:281885-282097  
 Satlength=213 Nr of Repeats=4 RepeatLength=53 seed=CGCCACAAAC Num.seqs=4

Similarity=0.890985 40  
 TGCTGCCACTTTT-CATGT-GAAAGCATCCATGTTTGTGGCGTCATTC-CCC-GTAG  
 Rev.of\_GCF\_000709935.2\_ASM70993v2\_genomic.fna\_15:188408-188619  
 Satlength=212 Nr of Repeats=4 RepeatLength=53 seed=CGCCACAAAC Num.seqs=3  
 Similarity=0.899371 40  
 TGCCGCCACTTTT-CATGT-GAAAGCATCCATGTTTGTGGCGTCATTC-CCC-GTAG  
 GCF\_000708755.2\_ASM70875v2\_genomic.fna\_22:121820-122085 Satlength=266 Nr  
 of Repeats=5 RepeatLength=53 seed=TGGCGTCATT Num.seqs=5  
 Similarity=0.899371  
 88 TGCTGCCACTTTTGCCGGA-G-AAGGGTCTTGTGTTGTGGCGTCATTC-CGC-GAAG  
 GCF\_000709935.2\_ASM70993v2\_genomic.fna\_24:232406-232777 Satlength=372 Nr  
 of Repeats=7 RepeatLength=53 seed=TGGCGTCATT Num.seqs=7  
 Similarity=0.901767  
 88 TGCTGCCACTTTTGCCAGA-G-AAGGGTCTNGTTTGTGGCGTCATTC-CGC-GTAG  
 GCF\_000709935.2\_ASM70993v2\_genomic.fna\_1:491832-492044 Satlength=213 Nr  
 of Repeats=4 RepeatLength=53 seed=ATCCTAGTTT Num.seqs=4  
 Similarity=0.809671  
 77 TGGTGCCACTTTTATCGTA-G-TTGGATCCTAGTTTGTGGCGTCATTC--GCTGTAG  
 Rev.of\_GCF\_000709935.2\_ASM70993v2\_genomic.fna\_5:571905-572276  
 Satlength=372 Nr of Repeats=7 RepeatLength=53 seed=ACGAATGACG Num.seqs=7  
 Similarity=0.841869 101  
 TGCCGCCACTTTTACCAGA-G-ATGGATGATGGTTAGTGGCGTCATTC--GTTGTAG  
 GCF\_000709935.2\_ASM70993v2\_genomic.fna\_4:195544-195756 Satlength=213 Nr  
 of Repeats=4 RepeatLength=53 seed=CCACTTTTTC Num.seqs=4  
 Similarity=0.895178  
 111 TGACGCCACTTTTTCCAGT-G-ATGGATCCTCATTTGTGGCGTCATTCA-GC-TTAG  
 Rev.of\_GCF\_000709935.2\_ASM70993v2\_genomic.fna\_15:32457-32775  
 Satlength=319 Nr of Repeats=5 RepeatLength=53 seed=CACTACCGCG Num.seqs=4  
 Similarity=0.756813 161  
 TGGCGCCACTTTTGCCTTT-G-ATGAATGCTCATTTGTGGCGTCATTC--GCGGTAG

\*\*      \*      \*      \*      \*      \*  
 Consensus:

TGctGCCACTTTtacCnGaGatGgATcCtcaTTTGTGGCGTCATTCgcngtAG

>Bacillus\_Fam\_20\_52\_13 Nr. of seq. 13 Alignment length(with gaps) = 53  
 Alignment score = 0.740364  
 GCF\_000175075.1\_ASM17507v1\_genomic.fna\_7:33338-33546 Satlength=209 Nr of  
 Repeats=4 RepeatLength=52 seed=ATGAAGACCT Num.seqs=4 Similarity=0.867521  
 0 ATGAAGACCTGAGTGACCAGGAAAAAGGAGAAGAGATGTCCTCATC-GCCGTG  
 GCF\_000175075.1\_ASM17507v1\_genomic.fna\_34:118251-118459 Satlength=209 Nr  
 of Repeats=4 RepeatLength=52 seed=AGTCCTCATA Num.seqs=4  
 Similarity=0.910256  
 36 ATGAAGACCTGAGTGACGAGGAAAAAGGAGAGAGAAGTCCTCATA-GCGGTG  
 GCF\_000175075.1\_ASM17507v1\_genomic.fna\_36:211307-211515 Satlength=209 Nr  
 of Repeats=4 RepeatLength=52 seed=TCAGTGACGA Num.seqs=4  
 Similarity=0.854701  
 9 ATGAAGACCTCAGTGACGAGGAAAAAGGACGAGAGACGTCCTCATC-GCCGTG  
 GCF\_000175075.1\_ASM17507v1\_genomic.fna\_36:173392-173704 Satlength=313 Nr  
 of Repeats=6 RepeatLength=52 seed=GGTATGAAGA Num.seqs=6  
 Similarity=0.865199  
 48 -TGAAGACCTGAGTGACAAGGAAAACGGAGAAGAGAAGTCCTCATCGGCGGTA

Rev.of\_GCF\_000175075.1\_ASM17507v1\_genomic.fna\_29:100527-100736  
 Satlength=210 Nr of Repeats=4 RepeatLength=52 seed=GGTCTTCATA Num.seqs=3  
 Similarity=0.880342 9  
 ATGAAGACCTCAGTGGCAAAGAAAAAGGAGAAGAGAGGTTCTCATC-GCCGTT  
 GCF\_000175075.1\_ASM17507v1\_genomic.fna\_39:32383-32643 Satlength=261 Nr of  
 Repeats=5 RepeatLength=52 seed=GTTATGAAGA Num.seqs=5 Similarity=0.902564  
 49 ATGAAGACNCCAGTGACAAGGAAAAAGGAGGAGAGAAGTCTTCATC-GCTGTT  
 GCF\_000175075.1\_ASM17507v1\_genomic.fna\_42:230894-231206 Satlength=313 Nr  
 of Repeats=5 RepeatLength=52 seed=GTGATGAAGA Num.seqs=4  
 Similarity=0.860587  
 49 ATGAAGACATGAGTGACGAGGAAAAAGGAATAGAGGAGTCCTCATG-GTTGTG  
 Rev.of\_GCF\_000175075.1\_ASM17507v1\_genomic.fna\_31:61128-61440  
 Satlength=313 Nr of Repeats=6 RepeatLength=52 seed=TCACTGATGT Num.seqs=6  
 Similarity=0.900855 16  
 ATGAAGACATCAGTGACGGGAAATTAGGAGGAGAGAGGTCCTCATC-GGTGTT  
 GCF\_000175075.1\_ASM17507v1\_genomic.fna\_32:122785-122993 Satlength=209 Nr  
 of Repeats=4 RepeatLength=52 seed=CGTTATGAAG Num.seqs=4  
 Similarity=0.841880  
 48 ATGAAGACATCAGTGACGAGAAATTAGGAGGAGAGAAGTCCTCATT-AGCGTT  
 GCF\_000175075.1\_ASM17507v1\_genomic.fna\_32:237136-237500 Satlength=365 Nr  
 of Repeats=7 RepeatLength=52 seed=CCGTTATGAA Num.seqs=7  
 Similarity=0.931624  
 99 ATGAAGACATCAGTGACGAGAAATCAGGAGGAGAGATGTCCTCATC-ACCGTT  
 GCF\_000175075.1\_ASM17507v1\_genomic.fna\_34:65970-66178 Satlength=209 Nr of  
 Repeats=4 RepeatLength=52 seed=GTTATGAAGA Num.seqs=4 Similarity=0.876068  
 49 ATGAAGACTTCAGTGACGAAGAATTAGGAGGAGAAAAGGTCCTCATC-GCCGTT  
 GCF\_000175075.1\_ASM17507v1\_genomic.fna\_39:143077-143336 Satlength=260 Nr  
 of Repeats=5 RepeatLength=52 seed=GTCCTCATCG Num.seqs=4  
 Similarity=0.910256  
 37 ATGAAGACCTCAGTGACGAAAAATCAGGAGGAGAGAAGTCCTCATC-GCCCGT  
 GCF\_000175075.1\_ASM17507v1\_genomic.fna\_42:276011-276219 Satlength=209 Nr  
 of Repeats=4 RepeatLength=52 seed=GAGAGAAGTC Num.seqs=4  
 Similarity=0.846154  
 82 ATGAAGACATCAGTGACGAGAAATCAGGAGGAGAGAAGTCCTCATC-GGCCGT

\*\*\*\*\*    \*\*\*\* \*       \*\*    \*\*\*    \*\*\*    \*\*    \*\*\*\*\*

Consensus:

ATGAAGACnTcAGTGACgAggAAaaAGGAGgAGAGAAgTCCTCATcGccGTt

>Bacillus\_Fam\_21\_36\_13 Nr. of seq. 13 Alignment length(with gaps) = 36  
 Alignment score = 0.755935  
 GCF\_000007825.1\_ASM782v1\_genomic.fna\_1:4360738-4360990 Satlength=253 Nr  
 of Repeats=7 RepeatLength=36 seed=TGTTATCCAT Num.seqs=7  
 Similarity=0.827160  
 0 TGTTATCCATAATCGGCATTATATTCGGCGGTTGGT  
 Rev.of\_GCF\_000299035.1\_ASM29903v1\_genomic.fna\_1:106604-107612  
 Satlength=1009 Nr of Repeats=28 RepeatLength=36 seed=ATGATGGATA  
 Num.seqs=28 Similarity=0.959436  
 13 TATTATCCATCATTGGCATCATATTCGGCATTTGGT  
 GCF\_000712615.1\_ASM71261v1\_genomic.fna\_1:665208-666336 Satlength=1129 Nr  
 of Repeats=27 RepeatLength=36 seed=TTATCCATCA Num.seqs=26  
 Similarity=0.882051 38  
 TATTATCCATCATTGGCATTATGTTTGGCATTTGGT

GCF\_000496285.1\_ASM49628v1\_genomic.fna\_1:1627516-1628017 Satlength=502 Nr of Repeats=11 RepeatLength=36 seed=GGCATCATAT Num.seqs=10  
 Similarity=0.912757 14  
 TGTTATCCATAATCGGCATCATATTCGGCATTTGAT  
 GCF\_000831065.1\_ASM83106v1\_genomic.fna\_1:4140717-4141077 Satlength=361 Nr of Repeats=10 RepeatLength=36 seed=TTGTTATCCA Num.seqs=10  
 Similarity=0.897942 35  
 TGTTATCCATAATTCGGCATCATATTCGGCATTTGAT  
 Rev.of\_GCF\_000775975.1\_ASM77597v1\_genomic.fna\_1:459960-460176  
 Satlength=217 Nr of Repeats=6 RepeatLength=36 seed=ATAATGGATA Num.seqs=6  
 Similarity=0.935802 49  
 TGTTATCCATTATTGGCATCATGTTTGGCATTTGGT  
 Rev.of\_GCF\_000832605.1\_ASM83260v1\_genomic.fna\_1:1527851-1528355  
 Satlength=505 Nr of Repeats=14 RepeatLength=36 seed=ATAATGGATA  
 Num.seqs=14 Similarity=0.853073  
 49 TGTTATCCATTATCGGCATCATGTTTGGCATTTGAT  
 Rev.of\_GCF\_001645555.1\_ASM164555v1\_genomic.fna\_1:182266-182692  
 Satlength=427 Nr of Repeats=8 RepeatLength=36 seed=AATATGATGC Num.seqs=6  
 Similarity=0.859259 61  
 TGTTATCCATTATCGGCATCATATTTGGCATTTGAT  
 GCF\_000007845.1\_ASM784v1\_genomic.fna\_1:4233572-4233860 Satlength=289 Nr of Repeats=5 RepeatLength=36 seed=GGTGGTTGAT Num.seqs=4  
 Similarity=0.981481  
 26 TGTTATCCATGATTGGCATAATGTTTGGTGGTTGAT  
 GCF\_000008505.1\_ASM850v1\_genomic.fna\_1:4223082-4223442 Satlength=361 Nr of Repeats=6 RepeatLength=36 seed=GGTGGTTGAT Num.seqs=4  
 Similarity=0.888889  
 26 TATTATCCATGATCGGCATAATGTTTGGTGGTTGAT  
 Rev.of\_GCF\_000290995.1\_Baci\_cere\_AND1407\_G13175\_V1\_genomic.fna\_2:421558-421882 Satlength=325 Nr of Repeats=9 RepeatLength=36 seed=TGGATAACAA  
 Num.seqs=9 Similarity=0.842593 45  
 TGTTATCCATAATTCGGCATGATGTTTGGTGGTTGAT  
 GCF\_000017425.1\_ASM1742v1\_genomic.fna\_1:3190001-3190505 Satlength=505 Nr of Repeats=14 RepeatLength=36 seed=GATTATTTTC Num.seqs=14  
 Similarity=0.928775 33  
 TATTTTCCGTCATCGGCATAATGTTTGGCATTTGGAT  
 Rev.of\_GCF\_000712595.1\_ASM71259v1\_genomic.fna\_7:58-238 Satlength=181 Nr of Repeats=5 RepeatLength=36 seed=CCGATGCCAA Num.seqs=5  
 Similarity=0.933333  
 34 TATCCCCATCATTTGGCATTACATTTGGCATCGGGT

\* \* \* \* \*

Consensus:

TgTTATCCATnATtGGCATnATgTTtGGcatTTGaT

>Bacillus\_Fam\_22\_53\_12 Nr. of seq. 12 Alignment length(with gaps) = 56

Alignment score = 0.655032

GCF\_002019665.1\_ASM201966v1\_genomic.fna\_1:26343-26811 Satlength=469 Nr of Repeats=9 RepeatLength=52 seed=GTTCCCTCTA Num.seqs=9 Similarity=0.864672

0 GTTCCCTCTATTT-TCGTTTTTC-AC-GATTTTCAGGGCACGAT-TACCCCTTGATC

Rev.of\_GCF\_002019665.1\_ASM201966v1\_genomic.fna\_1:250907-251218

Satlength=312 Nr of Repeats=6 RepeatLength=52 seed=GATCAAGGCG Num.seqs=5



Similarity=0.911950 0  
 GTTCCCTCTATTC-TCTTTTTTCGAA-G-TTTCAGGGCACGAT-GACGCCTTGATC  
 GCF\_002019665.1\_ASM201966v1\_genomic.fna\_1:2689409-2689721 Satlength=313  
 Nr of Repeats=6 RepeatLength=52 seed=TTGATCGTTA Num.seqs=6  
 Similarity=0.943590 46  
 GTTACCTCTATTT-TCACTTTCC-CC-AATTTGAGGGCACGAT-TAGACCTTGATC  
 Rev.of\_GCF\_002019665.1\_ASM201966v1\_genomic.fna\_1:1816049-1816621  
 Satlength=573 Nr of Repeats=11 RepeatLength=52 seed=AAAAGAGAGG  
 Num.seqs=11 Similarity=0.875991  
 14 GTTCCCTCTCTTT-TNGTTTTTG-GC-AATTTGAGGGCACGATCGGCGCC-TCATC  
 Rev.of\_GCF\_002019665.1\_ASM201966v1\_genomic.fna\_1:422515-422775  
 Satlength=261 Nr of Repeats=5 RepeatLength=52 seed=ATCGTGCCCT Num.seqs=5  
 Similarity=0.969231 40  
 GTTCCCTCTTTTTCTCGTTTTTC-GG--TTTTGAGGGCACGAT-TACGCTCTGATC  
 Rev.of\_GCF\_002019665.1\_ASM201966v1\_genomic.fna\_1:584690-585472  
 Satlength=783 Nr of Repeats=15 RepeatLength=52 seed=CCCTCAAAAA  
 Num.seqs=11 Similarity=0.894639  
 86 GTTCCCTCTTTTTCTCTTTTTTC-GT--TTTTGAGGGCACGAT-CACGCGCTGATC  
 Rev.of\_GCF\_002019665.1\_ASM201966v1\_genomic.fna\_1:1391349-1391817  
 Satlength=469 Nr of Repeats=9 RepeatLength=52 seed=GGGAACGATC Num.seqs=9  
 Similarity=0.933048 58  
 GTTCCCCCTTTTTCTCGTTTTTC-GT--TTTTGAGGGAACGAT-TATGCTCTGATC  
 Rev.of\_GCF\_002019665.1\_ASM201966v1\_genomic.fna\_1:1774595-1775572  
 Satlength=978 Nr of Repeats=11 RepeatLength=52 seed=AAAAGAGGGA  
 Num.seqs=9 Similarity=0.883191  
 64 GTTCCCTCTTTTTCTCATTTTTTC-AT--TTTTGAGGGCACGAT-CACGCTCCGATC  
 Rev.of\_GCF\_002019665.1\_ASM201966v1\_genomic.fna\_1:1834884-1835195  
 Satlength=312 Nr of Repeats=6 RepeatLength=52 seed=GAACGATTAG Num.seqs=5  
 Similarity=0.894872 56  
 GTTCCACCTATTTCTCTTTTTTC-GT--TTTTGAGGGCACGAT-CACGCGCTAATC  
 GCF\_002019665.1\_ASM201966v1\_genomic.fna\_1:3150058-3150578 Satlength=521  
 Nr of Repeats=10 RepeatLength=52 seed=GTTTTGAGGG Num.seqs=10  
 Similarity=0.849573 76  
 GTTCCCTCTATTTCTGGTTTTTC-GG--TTTTGAGGGCACGAT-CACGCTNCGATC  
 Rev.of\_GCF\_002019665.1\_ASM201966v1\_genomic.fna\_1:1307617-1308294  
 Satlength=678 Nr of Repeats=13 RepeatLength=52 seed=AAGAAAATAG  
 Num.seqs=12 Similarity=0.815371  
 69 GTTCCCTCTATTT-TC-TTTTTG-GGNGTTTTGAGGGCACGAT-TGCGCTCTGATC  
 GCF\_002019665.1\_ASM201966v1\_genomic.fna\_1:3411347-3411970 Satlength=624  
 Nr of Repeats=11 RepeatLength=52 seed=TTTGCTTTTT Num.seqs=9  
 Similarity=0.841880 114  
 GTTCCCTCTATTT-GC-TTTTTTC-GGCTTTTTGAGGGNACGAT-TACGCCCTGATC

\*\*\* \* \*\* \*\* \*\*\* \*\*\* \*\*\*\*\* \* \*\*\*

Consensus:

GTTCCCTCTaTTTcTCnTTTTTCgnntTTTgAGGGCACGATtACGCncTGATC

>Bacillus\_Fam\_23\_52\_12 Nr. of seq. 12 Alignment length(with gaps) = 55  
 Alignment score = 0.736639  
 GCF\_000169195.2\_ASM16919v2\_genomic.fna\_1:334744-335940 Satlength=1197 Nr  
 of Repeats=21 RepeatLength=52 seed=TTTTGTCCCTT Num.seqs=19  
 Similarity=0.483296 0  
 T---TTTGTCCTTTTGACNNNNTNAAAAAGACATTTTCGAGCCCNNGNGCATC-CG

GCF\_000169195.2\_ASM16919v2\_genomic.fna\_1:137480-138203 Satlength=724 Nr of Repeats=13 RepeatLength=52 seed=TTTGTCCCTTT Num.seqs=11  
Similarity=0.651623 1  
T---TTTGTCCCTTTTGACAGCTTCAAAAGGACATTTTCGNGCCCAGATACAGCTTG  
Rev.of\_GCF\_000169195.2\_ASM16919v2\_genomic.fna\_1:2466680-2467304  
Satlength=625 Nr of Repeats=12 RepeatLength=52 seed=CAAAAGGACA  
Num.seqs=12 Similarity=0.709783  
13 T---TTTGTCCCTTTTGACAGCTTCAAAAGGACATTTTCGGGCCCGGATGCAGCTCC  
GCF\_000217835.1\_ASM21783v1\_genomic.fna\_1:2234859-2235431 Satlength=573 Nr of Repeats=11 RepeatLength=52 seed=TTTGTCCCTTT Num.seqs=11  
Similarity=0.715600 53  
T---TTTGTCCCTTTTGACAGCTTCAAAAGGACATTTTCGAGCCCGGATGCAGCTCN  
Rev.of\_GCF\_000169195.2\_ASM16919v2\_genomic.fna\_1:979431-979847  
Satlength=417 Nr of Repeats=8 RepeatLength=52 seed=TGTCCTTTTG Num.seqs=8  
Similarity=0.771062 30  
T---TTTGTCCCTTTTGACAGGTTCAAAAGGACATTTTCGTTCCTCCGGATGCNGCTCG  
GCF\_000217835.1\_ASM21783v1\_genomic.fna\_1:335197-336033 Satlength=837 Nr of Repeats=14 RepeatLength=52 seed=TTGTCCCTTT Num.seqs=9  
Similarity=0.777778  
54 T---TTTGTCCCTTTTGACAGGATCAAAAGGACATTTTCGTTCCTCCGGATGCNGCAGC  
GCF\_000832905.1\_ASM83290v1\_genomic.fna\_1:2697159-2697888 Satlength=730 Nr of Repeats=14 RepeatLength=52 seed=TCAAAAGGAC Num.seqs=13  
Similarity=0.784309 71  
T---TTTGTCCCTTTTGACAGGATCAAAAGGACATTTTCGTTCCTCCGGATGCNGCAGC  
Rev.of\_GCF\_000169195.2\_ASM16919v2\_genomic.fna\_1:320698-321219  
Satlength=522 Nr of Repeats=10 RepeatLength=52 seed=CAAAAGGACA  
Num.seqs=9 Similarity=0.800570  
13 T---TTTGTCCCTTTTGACGGNTTCAAAAAGACATTTTCGGGCCCGGATGCANCGTG  
Rev.of\_GCF\_000169195.2\_ASM16919v2\_genomic.fna\_1:1299605-1300125  
Satlength=521 Nr of Repeats=9 RepeatLength=52 seed=ATGTCTTTTT Num.seqs=8  
Similarity=0.791217 31 T--  
-TTTGTCTTTTTGACGGCTTCAAAAGGACATTTTCGGGCCCGGATGCAACGTG  
GCF\_000169195.2\_ASM16919v2\_genomic.fna\_1:2593824-2594862 Satlength=1039  
Nr of Repeats=20 RepeatLength=52 seed=AAAAAGACAT Num.seqs=18  
Similarity=0.816323 21  
T---TTTGTCTTTTTGGCAGGTTCAAAAAGACATTTTCGGGCCCGGATGCAGCGTG  
GCF\_000217835.1\_ASM21783v1\_genomic.fna\_1:921872-922184 Satlength=313 Nr of Repeats=6 RepeatLength=52 seed=TGTTTTGTCC Num.seqs=6  
Similarity=0.866667  
50 T---TTTGTCCCTTTGTGCGCTTCAAAAAGACATTTTCGAGCCCGGATGCAACATG  
Rev.of\_GCF\_000217835.1\_ASM21783v1\_genomic.fna\_1:908745-908953  
Satlength=209 Nr of Repeats=4 RepeatLength=52 seed=TCAAAAGGAC Num.seqs=4  
Similarity=0.655136 14  
TCCTTTTGTCCCTTTTGACGGCTTCAAAAAGACATTTTCGGGCC--AAGCGNCA-G

\*   \*   \*   \*   \*   \*   \*   \*   \*   \*   \*   \*   \*   \*   \*   \*  
Consensus:

TTTTGTCCCTTTTGACaGctTCAAAAgGACATTTTCGngCCCGATGCagCncG

>Bacillus\_Fam\_24\_21\_12 Nr. of seq. 12 Alignment length(with gaps) = 23  
Alignment score = 0.627141

GCF\_000307875.1\_BABA1.0\_genomic.fna\_58:10690-10774 Satlength=85 Nr of Repeats=4 RepeatLength=21 seed=CGCTCATTGA Num.seqs=4 Similarity=0.638889  
0 CGCTCATTG-ACAGC-TTAAATT  
Rev.of\_GCF\_000307875.1\_BABA1.0\_genomic.fna\_137:4596-4680 Satlength=85 Nr of Repeats=4 RepeatLength=21 seed=ATGAGCGAAT Num.seqs=4  
Similarity=0.703704  
7 CGCTCATTGAACA-T-CGAAATT  
GCF\_000508325.1\_BAVI\_1\_genomic.fna\_122:15786-15870 Satlength=85 Nr of Repeats=4 RepeatLength=21 seed=AATTCGCCCA Num.seqs=4 Similarity=0.642677  
17 CGCCCATAGAACA-C-TGAAATT  
Rev.of\_GCF\_001591665.1\_ASM159166v1\_genomic.fna\_72:12480-12564 Satlength=85 Nr of Repeats=4 RepeatLength=21 seed=ATGGGCGAAT Num.seqs=4  
Similarity=0.613636 28  
CGCCCATTTGAAC-T-TGAAATT  
GCF\_001591445.1\_ASM159144v1\_genomic.fna\_17:116034-116118 Satlength=85 Nr of Repeats=4 RepeatLength=21 seed=ATTCGCTGAT Num.seqs=4  
Similarity=0.820106  
18 CGCTGATAGAACC-T-GGAAATT  
GCF\_000508325.1\_BAVI\_1\_genomic.fna\_85:26959-27124 Satlength=166 Nr of Repeats=4 RepeatLength=21 seed=GAAAATTCGC Num.seqs=3 Similarity=0.830688  
14 CGCCCATTTGAACC-C-GAAAATT  
GCF\_000508325.1\_BAVI\_1\_genomic.fna\_92:110555-110639 Satlength=85 Nr of Repeats=4 RepeatLength=21 seed=ATTCGCCCAT Num.seqs=4 Similarity=0.512731  
18 CGCCCATTTGAANG-C-TAAAATT  
Rev.of\_GCF\_001591665.1\_ASM159166v1\_genomic.fna\_58:4850-4934 Satlength=85 Nr of Repeats=4 RepeatLength=21 seed=AATGGGCGAA Num.seqs=4  
Similarity=0.625604 29  
CGCCCATTTGAACG-T-CAAAATT  
GCF\_000508325.1\_BAVI\_1\_genomic.fna\_87:23723-23807 Satlength=85 Nr of Repeats=4 RepeatLength=21 seed=AATTCGCCCA Num.seqs=4 Similarity=0.717172  
39 CGCCCATTTGAACC-TGCAAAATT  
Rev.of\_GCF\_000508325.1\_BAVI\_1\_genomic.fna\_105:66812-66896 Satlength=85 Nr of Repeats=4 RepeatLength=21 seed=ATGGGCGAAT Num.seqs=4  
Similarity=0.589372 27  
CGCCCATTTGAAAC-CC-GAAATT  
Rev.of\_GCF\_000508325.1\_BAVI\_1\_genomic.fna\_180:2145-2229 Satlength=85 Nr of Repeats=4 RepeatLength=21 seed=ATGGGCGAAT Num.seqs=4  
Similarity=0.671958  
27 CGCCCATTTGAACA-CC-NAAATT  
Rev.of\_GCF\_001591665.1\_ASM159166v1\_genomic.fna\_60:47968-48052 Satlength=85 Nr of Repeats=4 RepeatLength=21 seed=ATGGGCGAAT Num.seqs=4  
Similarity=0.664141 27  
CGCCCATTTGAATA-CC-AAAATT

\*\*\* \*\* \* \* \*\*\*\*\*

Consensus:

CGCcATTGAACncnnAAATT

>Bacillus\_Fam\_25\_20\_12 Nr. of seq. 12 Alignment length(with gaps) = 21  
Alignment score = 0.723545  
GCF\_000813125.1\_ASM81312v1\_genomic.fna\_20:18031-18110 Satlength=80 Nr of Repeats=4 RepeatLength=20 seed=TTTTTATAGC Num.seqs=3 Similarity=0.656566  
0 TTTTTAT-AGCGANAATTTCT

Rev.of\_GCF\_001315165.1\_ASM131516v1\_genomic.fna\_16:40325-40425  
Satlength=101 Nr of Repeats=5 RepeatLength=20 seed=CGCTATAAAA Num.seqs=5  
Similarity=0.563636 11  
NTTTTAT-AGCGAAAATTTNA  
GCF\_001315165.1\_ASM131516v1\_genomic.fna\_27:5637-5717 Satlength=81 Nr of  
Repeats=4 RepeatLength=20 seed=TTTTATAGCG Num.seqs=4 Similarity=0.666667  
21 TTTTAT-AGCGAAAATTTCA  
Rev.of\_GCF\_001315165.1\_ASM131516v1\_genomic.fna\_79:1018-1119 Satlength=102  
Nr of Repeats=5 RepeatLength=20 seed=GCTATAAAAA Num.seqs=4  
Similarity=0.711640 30  
TTTTTAT-AGCGAAAAGTTTA  
GCF\_000813125.1\_ASM81312v1\_genomic.fna\_39:13920-14020 Satlength=101 Nr of  
Repeats=4 RepeatLength=20 seed=TTTTTATAGC Num.seqs=3 Similarity=0.611111  
0 TTTTTAT-AGCGAAAATTCAN  
Rev.of\_GCF\_001315165.1\_ASM131516v1\_genomic.fna\_53:15227-15327  
Satlength=101 Nr of Repeats=5 RepeatLength=20 seed=TCGCTATAAA Num.seqs=5  
Similarity=0.621739 12  
TTTTTAT-AGCGAAATTTTAN  
Rev.of\_GCF\_000813125.1\_ASM81312v1\_genomic.fna\_73:60683-60763 Satlength=81  
Nr of Repeats=4 RepeatLength=20 seed=TTTCGCTATAA Num.seqs=4  
Similarity=0.578283 13  
TTTTTAT-AGCGAAAATCTAG  
Rev.of\_GCF\_001315165.1\_ASM131516v1\_genomic.fna\_10:70726-70826  
Satlength=101 Nr of Repeats=5 RepeatLength=20 seed=TCGCTATAAA Num.seqs=5  
Similarity=0.593333 32  
TTTTTAT-AGCGAAAATCTNG  
Rev.of\_GCF\_001315165.1\_ASM131516v1\_genomic.fna\_15:43524-43604  
Satlength=81 Nr of Repeats=4 RepeatLength=20 seed=TTTCGCTATA Num.seqs=4  
Similarity=0.667989 14  
TTTTTAT-AGCGAAAATCTAA  
Rev.of\_GCF\_001591465.1\_ASM159146v1\_genomic.fna\_6:87823-87925  
Satlength=103 Nr of Repeats=5 RepeatLength=20 seed=TCGCTCATAA Num.seqs=3  
Similarity=0.606061 12  
-TTTTATGAGCGAAAATTTAN  
GCF\_000813125.1\_ASM81312v1\_genomic.fna\_65:30212-30291 Satlength=80 Nr of  
Repeats=4 RepeatLength=20 seed=TTATAGCGAA Num.seqs=3 Similarity=0.644444  
3 ATATTAT-AGCGAAAATNTAN  
Rev.of\_GCF\_001315165.1\_ASM131516v1\_genomic.fna\_16:47524-47624  
Satlength=101 Nr of Repeats=5 RepeatLength=20 seed=TTTTCGCTAT Num.seqs=5  
Similarity=0.544000 15  
TTTNTAT-AGCGAAAANAAAN

\* \*\*\* \*\*\*\*\* \*

Consensus:

tTTTTATAGCGAAAATtTan

>Bacillus\_Fam\_26\_53\_11 Nr. of seq. 11 Alignment length(with gaps) = 58  
Alignment score = 0.666458  
BACILLUS\_PSEUDALCALIPHILUS\_genomic.fna\_1:484476-484813 Satlength=338 Nr of  
Repeats=7 RepeatLength=53 seed=GGTTAGTCGA Num.seqs=5 Similarity=0.869182  
0 GGTTAGTCGACATGATCATGGGCAAAAAAGGTCGAGAACCTGTCGATGAGG---AC--

BACILLUS\_PSEUDALCALIPHILUS\_genomic.fna\_2:427050-427315 Satlength=266 Nr of Repeats=5 RepeatLength=53 seed=CATGTCGATG Num.seqs=5 Similarity=0.854088  
 38 GGTGTCGACATGATCTTGGGCCAAAAAGGACGAGAACATGTCGATGAAG---GC--  
 Rev.of\_BACILLUS\_PSEUDALCALIPHILUS\_genomic.fna\_6:417351-418025  
 Satlength=675 Nr of Repeats=12 RepeatLength=53 seed=CTCGACCTTT  
 Num.seqs=10 Similarity=0.911111  
 89 AGTTGGTCGACATGATCATGGGTAAAAAAGGTCGAGATCATGTCGATGAAG---GC--  
 BACILLUS\_PSEUDALCALIPHILUS\_genomic.fna\_5:150308-150520 Satlength=213 Nr of Repeats=4 RepeatLength=53 seed=CGATGAAGGA Num.seqs=4 Similarity=0.861635  
 42 -GTTGGTCGACATGATCAAGAGCAAAAAAGGTCAAGAACCTGTCGATGAAG---GAG-  
 BACILLUS\_PSEUDALCALIPHILUS\_genomic.fna\_5:327893-328213 Satlength=321 Nr of Repeats=6 RepeatLength=53 seed=TGTCGATGAA Num.seqs=4 Similarity=0.928721  
 92 -GCTGGTCGACATGAACATGAGTAAAAAAGGCCAAGAACCTGTCGATGAAG---GAA-  
 BACILLUS\_PSEUDALCALIPHILUS\_genomic.fna\_5:528815-529185 Satlength=371 Nr of Repeats=7 RepeatLength=53 seed=CTGTCGATGA Num.seqs=6 Similarity=0.921174  
 144 -GCTGGTCGACATGATCATGAGTAAAAAAGGTCAAGAACCTGTCGATGAAG---GAA-  
 BACILLUS\_PSEUDALCALIPHILUS\_genomic.fna\_16:65979-66245 Satlength=267 Nr of Repeats=5 RepeatLength=53 seed=GACATGATCA Num.seqs=4 Similarity=0.928721  
 60 -GCTGGTCGACATGATCATGGGCCAAAAAAGCTGAAGAACCTGTCGATGAAG---GAA-  
 BACILLUS\_PSEUDALCALIPHILUS\_genomic.fna\_1:496997-497526 Satlength=530 Nr of Repeats=10 RepeatLength=53 seed=GACATGATCA Num.seqs=9  
 Similarity=0.889588 8  
 GGTAGTCGACATGATCACGAGAAAAAAGGGTAAGAACCTGTCGATAAAGA--G---  
 BACILLUS\_PSEUDALCALIPHILUS\_genomic.fna\_10:92314-92960 Satlength=647 Nr of Repeats=12 RepeatLength=53 seed=GTGGTCGACA Num.seqs=11  
 Similarity=0.828931 1  
 AG-TGGTCGACATGATCAGGANGAAAAAAGGCNGAGAACCTGTCGATGAAG--GGC--  
 BACILLUS\_PSEUDALCALIPHILUS\_genomic.fna\_5:157629-157946 Satlength=318 Nr of Repeats=6 RepeatLength=53 seed=AGAACATGTC Num.seqs=5 Similarity=0.904402  
 32 --ATGGACGACATGATCATGGGCCAAAAAAGTCAAGAACATGTCGATGA-G--TGAGT  
 BACILLUS\_PSEUDALCALIPHILUS\_genomic.fna\_4:6835-7366 Satlength=532 Nr of Repeats=10 RepeatLength=53 seed=TGGTCGACAT Num.seqs=9  
 Similarity=0.831962  
 3 CGTTGGTCGACATGATGTAGGTTGAAAAAGGGCCGGATCATGTCGATGA-G-AAG---

\* \* \* \* \* \* \* \* \* \* \* \* \* \* \* \* \* \*

Consensus:

nGtTGGTCGACATGATCAtGgGnAAAAAAGGncaAGAACcTGTTCGATGAaGGn

>Bacillus\_Fam\_27\_39\_11 Nr. of seq. 11 Alignment length(with gaps) = 40  
 Alignment score = 0.799394  
 GCF\_000007825.1\_ASM782v1\_genomic.fna\_1:4361056-4361329 Satlength=274 Nr of Repeats=7 RepeatLength=39 seed=CTACATTTTC Num.seqs=7  
 Similarity=0.810298  
 0 CTACATTTTCTTTCTTCACTTGCGGCGATACTATATT-TC  
 GCF\_000007845.1\_ASM784v1\_genomic.fna\_1:4233977-4234409 Satlength=433 Nr of Repeats=7 RepeatLength=39 seed=TTTTCTTTCT Num.seqs=6  
 Similarity=0.920228  
 5 CTACATTTTCTTTCTTCACTTGCGGTGATACTATATT-TC  
 GCF\_000008505.1\_ASM850v1\_genomic.fna\_1:4223515-4223749 Satlength=235 Nr of Repeats=6 RepeatLength=39 seed=CTACATTTTC Num.seqs=6  
 Similarity=0.872365  
 0 CTACATTTTCTTTCTTTACTTGCGGTGATACTATATT-TC

GCF\_000496285.1\_ASM49628v1\_genomic.fna\_1:1628212-1628485 Satlength=274 Nr of Repeats=7 RepeatLength=39 seed=ACATTTTCTT Num.seqs=7  
 Similarity=0.863248 2  
 CTACATTTTCTTTCTTTACTTGCGGCGATACTATGTT-TC  
 Rev.of\_GCF\_000290995.1\_Baci\_cere\_AND1407\_G13175\_V1\_genomic.fna\_2:421236-421470 Satlength=235 Nr of Repeats=6 RepeatLength=39 seed=ATAGTGTCAC  
 Num.seqs=6 Similarity=0.872365 34  
 CTACATTTTCTTTCTTTACTTGTTGGTGACACTATGTT-TC  
 Rev.of\_GCF\_001645555.1\_ASM164555v1\_genomic.fna\_1:181927-182083  
 Satlength=157 Nr of Repeats=4 RepeatLength=39 seed=ATAGTATCAC Num.seqs=4  
 Similarity=0.914530 34  
 CTACATTTTCTTTCTTTACTTGTTGGTGATACTATGTT-TC  
 Rev.of\_GCF\_000775975.1\_ASM77597v1\_genomic.fna\_1:459197-459950  
 Satlength=754 Nr of Repeats=13 RepeatLength=39 seed=GCAAGTGAAG  
 Num.seqs=12 Similarity=1.000000  
 23 CTACATTCTCTTTCTTCACTTGCGGCGACACTATATT-CC  
 Rev.of\_GCF\_000832605.1\_ASM83260v1\_genomic.fna\_1:1527503-1527698  
 Satlength=196 Nr of Repeats=5 RepeatLength=39 seed=CCGCAAGTGA Num.seqs=5  
 Similarity=0.945299 25  
 CTACATTNTCTTTCTTCACTTGCGGCGACACTATATT-CC  
 GCF\_000831065.1\_ASM83106v1\_genomic.fna\_1:4141206-4141440 Satlength=235 Nr of Repeats=6 RepeatLength=39 seed=GACACTATAT Num.seqs=6  
 Similarity=0.906553 26  
 CTACATTTTCTTTTTTCACTTGCGGCGACACTATATT-TC  
 GCF\_000161455.1\_ASM16145v1\_genomic.fna\_1:3733849-3734302 Satlength=454 Nr of Repeats=5 RepeatLength=39 seed=TTTTCTTTTT Num.seqs=3  
 Similarity=0.749288 5  
 TTACATTTTCTTTTTTCATTTGCGGCGCAACTATATT-AC  
 GCF\_000017425.1\_ASM1742v1\_genomic.fna\_1:3190635-3191025 Satlength=391 Nr of Repeats=10 RepeatLength=39 seed=ATTTTCTTTT Num.seqs=10  
 Similarity=0.900475 3  
 -TATATTTTCTTTTTTCACTTGTTGGTGCTGCGATATTCTC

\*\* \* \* \* \* \* \* \* \* \* \* \* \* \* \* \*

Consensus:

CTACATTTTCTTTcTTcACTTGcGGcGAtACTATaTTtC

>Bacillus\_Fam\_28\_21\_11 Nr. of seq. 11 Alignment length(with gaps) = 25  
 Alignment score = 0.604364  
 GCF\_001645685.2\_ASM164568v2\_genomic.fna\_1:3317387-3317534 Satlength=148  
 Nr of Repeats=7 RepeatLength=21 seed=TTTACTCGCC Num.seqs=7  
 Similarity=0.848828 0  
 TTTACTCGCCAATT--CGCG-GGC-  
 GCF\_001645685.2\_ASM164568v2\_genomic.fna\_1:3318620-3318745 Satlength=126  
 Nr of Repeats=6 RepeatLength=21 seed=TTTACTCGCC Num.seqs=5  
 Similarity=0.815873 0  
 TTTACTCGCCAATT--CGCA-NGC-  
 GCF\_001645685.2\_ASM164568v2\_genomic.fna\_1:3443422-3443693 Satlength=272  
 Nr of Repeats=12 RepeatLength=21 seed=CTTTACTCGC Num.seqs=11  
 Similarity=0.826446 20  
 TTTACTCGCCAATT--CGAG-TGC-  
 GCF\_001645685.2\_ASM164568v2\_genomic.fna\_1:3920495-3920579 Satlength=85 Nr of Repeats=4 RepeatLength=21 seed=CTCGCCAATT Num.seqs=4

Similarity=0.851852 25  
 TTTACTCGCCAATT--CGAG-CAC-  
 GCF\_001645685.2\_ASM164568v2\_genomic.fna\_1:3972827-3973253 Satlength=427  
 Nr of Repeats=9 RepeatLength=21 seed=TTTACTCGCC Num.seqs=6  
 Similarity=0.729101 0  
 TTTACTCGCCAATT--CG-G-GGNT  
 GCF\_001645685.2\_ASM164568v2\_genomic.fna\_1:3656001-3656127 Satlength=127  
 Nr of Repeats=6 RepeatLength=21 seed=CTCGCCAATT Num.seqs=6  
 Similarity=0.856085 4  
 TTTACTCGCCAATT-CCG-G-TCG-  
 GCF\_001645685.2\_ASM164568v2\_genomic.fna\_1:4110462-4110546 Satlength=85 Nr  
 of Repeats=4 RepeatLength=21 seed=TTTACTCGCC Num.seqs=4  
 Similarity=0.683081 21  
 TTTACTCGCCAATT-TCG-G-CGT-  
 Rev.of GCF\_001645685.2\_ASM164568v2\_genomic.fna\_1:180575-180782  
 Satlength=208 Nr of Repeats=6 RepeatLength=21 seed=TGGCGAGTAA Num.seqs=5  
 Similarity=0.660606 32  
 TTTACTCGCCAATTNTTCG-G-TGN-  
 GCF\_001645685.2\_ASM164568v2\_genomic.fna\_1:4286180-4286302 Satlength=123  
 Nr of Repeats=4 RepeatLength=21 seed=TTTACTCGCC Num.seqs=3  
 Similarity=0.647343 0  
 TTTACTCGCCAATT--TGNA-CGA-  
 GCF\_001645685.2\_ASM164568v2\_genomic.fna\_1:4375763-4376192 Satlength=430  
 Nr of Repeats=11 RepeatLength=21 seed=TTTACTCGCC Num.seqs=7  
 Similarity=0.788600 0  
 TTTACTCGCCAATT--TGAG-CNG-  
 GCF\_001645685.2\_ASM164568v2\_genomic.fna\_1:4377725-4378156 Satlength=432  
 Nr of Repeats=11 RepeatLength=21 seed=TTTACTCGCC Num.seqs=7  
 Similarity=0.753968 0  
 TTTACTCGCCAATT--TNAGNCT--

\*\*\*\*\*

Consensus:

TTTACTCGCCAATTcGnGngn

>Bacillus\_Fam\_29\_20\_11 Nr. of seq. 11 Alignment length(with gaps) = 22  
 Alignment score = 0.720386  
 GCF\_000813125.1\_ASM81312v1\_genomic.fna\_10:26480-26581 Satlength=102 Nr of  
 Repeats=4 RepeatLength=20 seed=TTTATTGGCG Num.seqs=3 Similarity=0.676768  
 10 ATNTT--CAAATTTTATTGGCG  
 GCF\_000813125.1\_ASM81312v1\_genomic.fna\_92:129270-129372 Satlength=103 Nr  
 of Repeats=5 RepeatLength=20 seed=TTTATTGGCG Num.seqs=3  
 Similarity=0.622222  
 10 ATTTT--NAAATTTTATTGGCG  
 GCF\_000813125.1\_ASM81312v1\_genomic.fna\_26:19181-19302 Satlength=122 Nr of  
 Repeats=6 RepeatLength=20 seed=TTTATTGGCG Num.seqs=5 Similarity=0.771429  
 10 ATATT--CTAATTTTATTGGCG  
 GCF\_000813125.1\_ASM81312v1\_genomic.fna\_128:14716-14818 Satlength=103 Nr  
 of Repeats=5 RepeatLength=20 seed=TTTATTGGCG Num.seqs=3  
 Similarity=0.671958  
 10 ATATT--TTAATTTTATTGGCG

GCF\_000813125.1\_ASM81312v1\_genomic.fna\_40:39070-39170 Satlength=101 Nr of Repeats=4 RepeatLength=20 seed=TTATTGGCGA Num.seqs=3 Similarity=0.688889  
 11 ATTTT--CTAATTTTATTGGCG  
 Rev.of\_GCF\_001315165.1\_ASM131516v1\_genomic.fna\_54:20708-20789  
 Satlength=82 Nr of Repeats=4 RepeatLength=20 seed=TCGCCAATAA Num.seqs=3  
 Similarity=0.622222 21  
 ATTTT--CNAATTTTATTGGCG  
 GCF\_000813125.1\_ASM81312v1\_genomic.fna\_69:8482-8584 Satlength=103 Nr of Repeats=5 RepeatLength=20 seed=TTATTGGCGA Num.seqs=3 Similarity=0.560606  
 11 ANTTT--CANATTTTATTGGCG  
 GCF\_000813125.1\_ASM81312v1\_genomic.fna\_144:11821-11921 Satlength=101 Nr of Repeats=5 RepeatLength=20 seed=TTTTATTGGC Num.seqs=5  
 Similarity=0.723810  
 29 ATTTT--CAGTTTTTATTGGCG  
 Rev.of\_GCF\_000934845.1\_ASM93484v1\_genomic.fna\_189:8715-8817 Satlength=103  
 Nr of Repeats=5 RepeatLength=20 seed=CGCCAATAAA Num.seqs=3  
 Similarity=0.755556 20  
 ATAAT--CANATTTTATTGGCG  
 GCF\_000813125.1\_ASM81312v1\_genomic.fna\_40:72461-72583 Satlength=123 Nr of Repeats=6 RepeatLength=20 seed=TTATTGGCGA Num.seqs=4 Similarity=0.633102  
 32 ATAATC--CAAATTTTATTGGCG  
 Rev.of\_GCF\_000934845.1\_ASM93484v1\_genomic.fna\_68:108728-108809  
 Satlength=82 Nr of Repeats=4 RepeatLength=20 seed=CGCCAATAAA Num.seqs=3  
 Similarity=0.666667 19  
 ATTTT-TTNCAT-TTATTGGCG

\*\*\*\*\* \* \*

Consensus:

TTTATTGGCGATtTTcaaAT

>Bacillus\_Fam\_30\_18\_11 Nr. of seq. 11 Alignment length(with gaps) = 19  
 Alignment score = 0.651675  
 GCF\_000007825.1\_ASM782v1\_genomic.fna\_1:2602019-2602271 Satlength=253 Nr of Repeats=13 RepeatLength=18 seed=CCTGTTACTC Num.seqs=12  
 Similarity=0.975309 0  
 CCTGTTACTCCAGTTGGA-  
 Rev.of\_GCF\_000712595.1\_ASM71259v1\_genomic.fna\_10:146400-146544  
 Satlength=145 Nr of Repeats=8 RepeatLength=18 seed=GGTCCAACCTG Num.seqs=8  
 Similarity=0.928571 2  
 CCTGTTGCTCCAGTTGGA-  
 GCF\_000775975.1\_ASM77597v1\_genomic.fna\_1:2396734-2396859 Satlength=126 Nr of Repeats=7 RepeatLength=18 seed=GGACCCGTTA Num.seqs=6  
 Similarity=0.906173 15  
 CCGGTTACTCCCGTTGGA-  
 GCF\_000832605.1\_ASM83260v1\_genomic.fna\_1:3447183-3447381 Satlength=199 Nr of Repeats=11 RepeatLength=18 seed=GTGGACCCG Num.seqs=11  
 Similarity=0.935354 30  
 CCGGTTACTCCTGTTGGA-  
 Rev.of\_GCF\_001307105.1\_ASM130710v1\_genomic.fna\_16:4592-4880 Satlength=289  
 Nr of Repeats=14 RepeatLength=18 seed=CCAACGGGAG Num.seqs=10  
 Similarity=0.840329 17  
 CCGGTTACTCCCGTTGGG-



Rev.of\_GCF\_001584325.1\_ASM158432v1\_genomic.fna\_5:37432-37900  
 Satlength=469 Nr of Repeats=19 RepeatLength=18 seed=ACCGGAGTAA  
 Num.seqs=12 Similarity=0.787347  
 14 CCTGTTACTCCGGTT-GAC  
 Rev.of\_GCF\_000305495.1\_BacPsy2.0\_genomic.fna\_162:38-785 Satlength=748 Nr  
 of Repeats=21 RepeatLength=18 seed=CAGGAGCAAC Num.seqs=13  
 Similarity=0.711651 4  
 CCTGTTACTCCTGTTGCT-  
 GCF\_900096965.1\_IMG-  
 taxon\_2671180223\_annotated\_assembly\_genomic.fna\_5:141837-142206  
 Satlength=370 Nr of Repeats=20 RepeatLength=18 seed=CCTGTCACTC  
 Num.seqs=19 Similarity=0.843621 18  
 CCTGTCACTCCNGTTGCT-  
 Rev.of\_GCF\_000831065.1\_ASM83106v1\_genomic.fna\_1:2131967-2132240  
 Satlength=274 Nr of Repeats=13 RepeatLength=18 seed=GGAGCAACAG  
 Num.seqs=10 Similarity=0.856790  
 20 CCTGTAAACCTGTTGCT-  
 Rev.of\_GCF\_000380245.2\_ASM38024v2\_genomic.fna\_12:1413968-1414058  
 Satlength=91 Nr of Repeats=5 RepeatLength=18 seed=ACAGGAGTAA Num.seqs=5  
 Similarity=0.770000 14  
 CCAGTTACTCCTGTCTCA-  
 GCF\_001307105.1\_ASM130710v1\_genomic.fna\_2:66844-66916 Satlength=73 Nr of  
 Repeats=4 RepeatLength=18 seed=TCCTGTGGCA Num.seqs=4 Similarity=0.802469  
 26 CCCGTAACCTCCTGTGGCA-

\*\* \*\*      \*\* \*\*  
 Consensus:

CCTGTTACTCCnGTTGga

>Bacillus\_Fam\_31\_51\_10 Nr. of seq. 10 Alignment length(with gaps) = 56  
 Alignment score = 0.632407  
 GCF\_000752035.1\_Bacillus\_rubiinfantis\_genomic.fna\_11:206605-207962  
 Satlength=1358 Nr of Repeats=18 RepeatLength=51 seed=GTTGTCCATT  
 Num.seqs=17 Similarity=0.781297 0  
 GTTGTCCATTAGAA-GCGNGCTATTGGACANGAATCTGG---CGAATAGTGAAAA-  
 Rev.of\_GCF\_000752035.1\_Bacillus\_rubiinfantis\_genomic.fna\_11:595095-595401  
 Satlength=307 Nr of Repeats=6 RepeatLength=51 seed=GACAACTTTT Num.seqs=6  
 Similarity=0.752621 6  
 GTTGTCCAATAGAA-GCGGTCTAATGGACAAGAAACTGG---CGGAAAGCGAAAA-  
 Rev.of\_GCF\_000752035.1\_Bacillus\_rubiinfantis\_genomic.fna\_12:6507-6864  
 Satlength=358 Nr of Repeats=7 RepeatLength=51 seed=TGTCCATTAG Num.seqs=7  
 Similarity=0.750649 29  
 GTTGTCCAATAGAA-GCGGTCTAATGGACAAGAATCCGG---TGAAAAGGGAAAA-  
 Rev.of\_GCF\_000752035.1\_Bacillus\_rubiinfantis\_genomic.fna\_16:36137-37771  
 Satlength=1635 Nr of Repeats=32 RepeatLength=51 seed=GACAACTTTT  
 Num.seqs=30 Similarity=0.860404 6  
 GTTGTCCAATAGAA-GCGGTCTAATGGACAAGAAT-TCGA--GAAAANGCGAAAA-  
 Rev.of\_GCF\_000752035.1\_Bacillus\_rubiinfantis\_genomic.fna\_30:179952-181023  
 Satlength=1072 Nr of Repeats=21 RepeatLength=51 seed=TTGTCCATTA  
 Num.seqs=21 Similarity=0.886905 30  
 GATGTCCAATAGAA-GCAGTCTAATGGACAAGAATCTCG---TAAAAAGCGAAAA-  
 Rev.of\_GCF\_000752035.1\_Bacillus\_rubiinfantis\_genomic.fna\_33:32726-35276  
 Satlength=2551 Nr of Repeats=50 RepeatLength=51 seed=TTGGACAGCT

Num.seqs=50 Similarity=0.848494 60  
 GCTGTCCAATAGAA-GCGGTCTAATGGACAAGAATNTGG---TAAAAAGCGAAAA-  
 Rev.of\_GCF\_000752035.1\_Bacillus\_rubiinfantis\_genomic.fna\_11:535628-535985  
 Satlength=358 Nr of Repeats=6 RepeatLength=51 seed=CCAATAGACC Num.seqs=5  
 Similarity=0.921569 25 -  
 TTGTCCAATAGAA-GAGGTCTATTGGACAAAAATTCGG---TAAAATCCAGAAAG  
 Rev.of\_GCF\_000752035.1\_Bacillus\_rubiinfantis\_genomic.fna\_12:28322-28577  
 Satlength=256 Nr of Repeats=5 RepeatLength=51 seed=CACCTTCTAT Num.seqs=5  
 Similarity=0.932026 68 -  
 CTGTCCAATAGAA-GGTGTCTATTGGACAAAAACAGAG---AGAAACGCGAAAAAG  
 Rev.of\_GCF\_000752035.1\_Bacillus\_rubiinfantis\_genomic.fna\_11:525341-525954  
 Satlength=614 Nr of Repeats=12 RepeatLength=51 seed=TGTCATTAG  
 Num.seqs=11 Similarity=0.773310 29  
 GTTGTCCAATAGGAGGCG-TCTAATGGACAAGAATCTAG-TTTTTCAA--GAAAA-  
 Rev.of\_GCF\_000752035.1\_Bacillus\_rubiinfantis\_genomic.fna\_11:608592-608898  
 Satlength=307 Nr of Repeats=6 RepeatLength=51 seed=CAACTTTTCT Num.seqs=6  
 Similarity=0.925054 55  
 GTTGTCCGATAGGA-GCGTTCTAATGGACAAGAACTGG-ATTTTTAA--GAAAA-

\*\*\*\*\* \*\*\* \* \* \*\*\* \*\*\*\*\* \*\* \* \*\*\*

Consensus:

gtTGTCCAATAGaAGcggTCTAaTGGACAaGAAAtctgGtnaaAagcGAAAA

>Bacillus\_Fam\_32\_52\_10 Nr. of seq. 10 Alignment length(with gaps) = 56  
 Alignment score = 0.659061  
 GCF\_001439965.1\_ASM143996v1\_genomic.fna\_95:88322-88842 Satlength=521 Nr  
 of Repeats=10 RepeatLength=52 seed=TTTCGTTACC Num.seqs=10  
 Similarity=0.717710 0  
 TTTCGTTACCCCTGGACACNCGTTTTTCCTCCTTCTCGGTAACCAA--ACGCTCCC--  
 GCF\_001887185.1\_ASM188718v1\_genomic.fna\_43:14953-15212 Satlength=260 Nr  
 of Repeats=5 RepeatLength=52 seed=TTTCGTTACC Num.seqs=4  
 Similarity=0.759259  
 0 TTTCGTTACCCCTGCACAACCATTTTCCTCCTTCTCGGTAACCAATCACGCTTCC--  
 Rev.of\_GCF\_001439965.1\_ASM143996v1\_genomic.fna\_97:186923-187395  
 Satlength=473 Nr of Repeats=8 RepeatLength=52 seed=AAAAAGCGTG Num.seqs=6  
 Similarity=0.810256 25  
 TTTAGTTACCCCTGCACACGCTTTTTTCTCCTTCTCGGTAATCATT--CGCTCAC--  
 GCF\_001887185.1\_ASM188718v1\_genomic.fna\_124:9302-9509 Satlength=208 Nr of  
 Repeats=4 RepeatLength=52 seed=TTTTCTCCT Num.seqs=3 Similarity=0.871795  
 21 TTTTGTTACCGACACACATATTTTCCTCCTTCTCGGTAACCAAT--CACTCTC--  
 Rev.of\_GCF\_001887185.1\_ASM188718v1\_genomic.fna\_447:7-267 Satlength=261 Nr  
 of Repeats=5 RepeatLength=52 seed=ACCGAGAAGG Num.seqs=5  
 Similarity=0.887179 38  
 TTTTGTTACCCGACACACATATTTTCCTCCTTCTCGGTAACCAAT--CACTCTC--  
 GCF\_002009555.1\_ASM200955v1\_genomic.fna\_401:30074-30282 Satlength=209 Nr  
 of Repeats=4 RepeatLength=52 seed=CTCCTTCTCG Num.seqs=4  
 Similarity=0.897436  
 26 TTTTGTTACCAGACACACATATTTTCCTCCTTCTCGGTAACCAAT--CGCTCTC--  
 GCF\_002009555.1\_ASM200955v1\_genomic.fna\_259:2631-2838 Satlength=208 Nr of  
 Repeats=4 RepeatLength=52 seed=CTCCTTCTCG Num.seqs=3 Similarity=0.709402  
 26 TTTCGTTACCCGACACACACATTTTCCTCCTTCTCGGTCACCAAT--CGCTCTC--  
 Rev.of\_GCF\_001439965.1\_ASM143996v1\_genomic.fna\_122:142659-143596  
 Satlength=938 Nr of Repeats=18 RepeatLength=52 seed=AGAGTTTGAT

Num.seqs=17 Similarity=0.797323  
 49 TTTCGTTACCGGGCTCGCGCTATTTCTCCTTCANGGTAATCAAA--CTCT-TC-C  
 Rev.of\_GCF\_002009555.1\_ASM200955v1\_genomic.fna\_552:2070-2278  
 Satlength=209 Nr of Repeats=4 RepeatLength=52 seed=GGTAACGAAA Num.seqs=4  
 Similarity=0.820513 63  
 TTTCGTTACCGTGCTCGCGCAATTTTCTCCTTCAAGGTAATCAAT--CGC--TCTC  
 Rev.of\_GCF\_002009555.1\_ASM200955v1\_genomic.fna\_138:2615-3236  
 Satlength=622 Nr of Repeats=10 RepeatLength=52 seed=GAGAGTTTGA  
 Num.seqs=8 Similarity=0.873626  
 49 TTGGTTACCGTGCACGCTCATTTTCTCCTTCAAAGGAATCAAA--CTCTCTC--

\*\*\* \* \* \* \* \* \* \* \*

Consensus:

TTTcGTTACcggCaCaCncatTTTcCTCCTTctcGGTAAcCAAtCgCTctC

>Bacillus\_Fam\_33\_52\_10 Nr. of seq. 10 Alignment length(with gaps) = 55  
 Alignment score = 0.634747  
 GCF\_000177235.2\_ASM17723v2\_genomic.fna\_1:18432-18848 Satlength=417 Nr of  
 Repeats=8 RepeatLength=52 seed=GTGTATCATA Num.seqs=8 Similarity=0.638889  
 0 GTGTATCATACGAGG-CCAATGACACGCGAGAAAGTA-G-TAGGAACGAAATAAA  
 GCF\_000177235.2\_ASM17723v2\_genomic.fna\_1:43977-44445 Satlength=469 Nr of  
 Repeats=9 RepeatLength=52 seed=AATAAAGTGT Num.seqs=7 Similarity=0.689594  
 46 GTGTATCATACGAAG-GCAATGACACGNGAGAAAGTA-G-TGGGAACGNAATAAA  
 GCF\_000177235.2\_ASM17723v2\_genomic.fna\_1:112827-113243 Satlength=417 Nr  
 of Repeats=8 RepeatLength=52 seed=AATAAAGTGT Num.seqs=6  
 Similarity=0.628283  
 47 GTGTATCATACGAAG-GCAATGACACATAAGAAAGTAGG-GAGGAACGGAATAAA  
 Rev.of\_GCF\_000177235.2\_ASM17723v2\_genomic.fna\_1:2556156-2556519  
 Satlength=364 Nr of Repeats=7 RepeatLength=52 seed=ACACTTTATT Num.seqs=6  
 Similarity=0.648148 4  
 GTGTGTCATAGAAGT-GCAATGACACGTGAGAAAGTANG-TGGAAACG-AATAAA  
 Rev.of\_GCF\_000177235.2\_ASM17723v2\_genomic.fna\_1:2731003-2731368  
 Satlength=366 Nr of Repeats=7 RepeatLength=52 seed=ACACTTTATT Num.seqs=5  
 Similarity=0.677987 4  
 GTGTATCATACGAGN-GCAATGACACGTGAGAAAGTANG-TGGAAACG-AATAAA  
 Rev.of\_GCF\_000177235.2\_ASM17723v2\_genomic.fna\_1:3973488-3975773  
 Satlength=2286 Nr of Repeats=37 RepeatLength=52 seed=TTTATTTGCT  
 Num.seqs=27 Similarity=0.882460  
 0 GTGTTTCATACGNAG-TCAATGACACATGAGAATGAA-GAAAGAAGCA-AATAAA  
 Rev.of\_GCF\_000177235.2\_ASM17723v2\_genomic.fna\_1:4069392-4069808  
 Satlength=417 Nr of Repeats=8 RepeatLength=52 seed=CTTCGTATGA Num.seqs=6  
 Similarity=0.780247 15  
 GTGTATCATACGAAG-TCAATGACACGTGAAAAAGCC-G-AAGAGCCAGAATAAT  
 Rev.of\_GCF\_000177235.2\_ASM17723v2\_genomic.fna\_1:2719945-2720257  
 Satlength=313 Nr of Repeats=6 RepeatLength=52 seed=GCGTGTTCATT Num.seqs=6  
 Similarity=0.817094 27  
 ATGTGTCATACGGGG-TCAATGACACGCGAGAAAGCT-G-AAGAATTGAAATAAG  
 Rev.of\_GCF\_000177235.2\_ASM17723v2\_genomic.fna\_1:2784025-2784389  
 Satlength=365 Nr of Repeats=7 RepeatLength=52 seed=TCGTGTGTCA Num.seqs=7  
 Similarity=0.880204 29  
 ATGTATCATACAAAG-GCAATGACACACGAGAAAGAA-G-AAGAATGAAAATAAG  
 GCF\_000177235.2\_ASM17723v2\_genomic.fna\_1:275907-276426 Satlength=520 Nr  
 of Repeats=9 RepeatLength=52 seed=ATAAGATGTG Num.seqs=8

Similarity=0.823302

47 ATGTGTCATACGAGGAGCAATGCCACGCGAAAAAGTC-G-AGTCGTCAAATAAG

\*\*\* \*\*\*\*\* \* \* \* \* \*

Consensus:

gTGTaTCATACgaaggCAATGACACgtGAgAAAGtaGaaGaaacgnAATAAa

>Bacillus\_Fam\_34\_52\_10 Nr. of seq. 10 Alignment length(with gaps) = 54

Alignment score = 0.660905

GCF\_000186145.1\_Bacillus\_sp\_2\_A\_57\_CT2\_V1\_genomic.fna\_2:429780-430040

Satlength=261 Nr of Repeats=5 RepeatLength=52 seed=TGTCCGAAGT Num.seqs=5

Similarity=0.928205 0

TGTCCGAAGTGGCGCTAAGTTCGGACTCACTCTCCCTGTTTTCTG-CT-TCTTC

GCF\_000294775.2\_ASM29477v2\_genomic.fna\_1:5091581-5091934 Satlength=354 Nr

of Repeats=5 RepeatLength=52 seed=TCCCTGTTTT Num.seqs=3

Similarity=0.931624 32

TGTCCGAAGTAGCGCTAAGTTCGGACTCACTCTCCCTGTTTTCCG-CT-TCTTC

GCF\_000186145.1\_Bacillus\_sp\_2\_A\_57\_CT2\_V1\_genomic.fna\_2:563975-564288

Satlength=314 Nr of Repeats=6 RepeatLength=52 seed=GATTTCTGCT Num.seqs=5

Similarity=0.864103 37

TGTCCGAAGTGGCTTCAGGTTTCGGACTCTTTCTCCCCGATTTCTG-CT-TCTCC

Rev.of\_GCF\_000186145.1\_Bacillus\_sp\_2\_A\_57\_CT2\_V1\_genomic.fna\_5:65621-

65881 Satlength=261 Nr of Repeats=5 RepeatLength=52 seed=AAGCGAAAAA

Num.seqs=5 Similarity=0.906289 48

TGTCCGAAGTTCGCACCAACTTCGGACTCCTTCTCTCCCTTTTTTCG-CTTT-TCC

GCF\_000294775.2\_ASM29477v2\_genomic.fna\_1:2845024-2845284 Satlength=261 Nr

of Repeats=5 RepeatLength=52 seed=GCACCAACTT Num.seqs=5

Similarity=0.907692 64

TGTCCGAAGTTCGCACCAACTTCGGACTCTTTCTCTCCCTTTTTTCG-CT-TCTTC

GCF\_000294775.2\_ASM29477v2\_genomic.fna\_1:5362631-5363411 Satlength=781 Nr

of Repeats=15 RepeatLength=52 seed=CTGTCCGAAG Num.seqs=15

Similarity=0.870574 51

TGTCCGAAGTTACACCAAGTTCGGACTCTATCTCTCGGTTTTCCGNCT--CTCC

GCF\_000186145.1\_Bacillus\_sp\_2\_A\_57\_CT2\_V1\_genomic.fna\_2:825884-826248

Satlength=365 Nr of Repeats=7 RepeatLength=52 seed=CTGTCCGAAT Num.seqs=7

Similarity=0.768010 51

TGTCCGAATCNGCGCCAACTTCGGACTCATTNCNCTCGGATTTCTC-CT-CCTCC

GCF\_000294775.2\_ASM29477v2\_genomic.fna\_1:5435232-5435596 Satlength=365 Nr

of Repeats=7 RepeatLength=52 seed=CTGTCCGAAT Num.seqs=7

Similarity=0.768010 51

TGTCCGAATCNGCGCCAACTTCGGACTCATTNCNCTCGGATTTCTC-CT-CCTCC

GCF\_000294775.2\_ASM29477v2\_genomic.fna\_1:3419345-3419761 Satlength=417 Nr

of Repeats=8 RepeatLength=52 seed=TTCGGACTCA Num.seqs=6

Similarity=0.837607 71

TGTCCGAAGGTGCGCCGACTTCGGACTCATTCCCTCGGATTCTTG-CT-TCTTC

GCF\_000294775.2\_ASM29477v2\_genomic.fna\_1:5335150-5335462 Satlength=313 Nr

of Repeats=6 RepeatLength=52 seed=ACTTCGGACT Num.seqs=6

Similarity=0.593487 69

TGTCCGAATAACTGCCAACTTCGGACTCAACCTCTCCGATTTCTA-CT-CCTAC

\*\*\*\*\* \*\*\*\*\* \* \* \* \* \*

Consensus:

TGTCCGAAGtngCgCcAAcTTCGGACTCatTcTcCngaTTTctgCTtCTcC

>Bacillus\_Fam\_35\_52\_10 Nr. of seq. 10 Alignment length(with gaps) = 53  
Alignment score = 0.701887  
GCF\_000708755.2\_ASM70875v2\_genomic.fna\_1:11198-11612 Satlength=415 Nr of  
Repeats=8 RepeatLength=52 seed=TTGATGGTTC Num.seqs=7 Similarity=0.831502  
0 TTGATGGTTCGATCACGGAGATAAGTGCCATCAAAACAGAAAATCCTCNGT-  
GCF\_000708755.2\_ASM70875v2\_genomic.fna\_6:420022-420334 Satlength=313 Nr  
of Repeats=6 RepeatLength=52 seed=TTGATGGTTC Num.seqs=6  
Similarity=0.788034  
0 TTGATGGTTCCTATCCCGAGATAAGTGCCACCAAAAANGGAAAATCCACCGC-  
GCF\_000709935.2\_ASM70993v2\_genomic.fna\_5:627734-628098 Satlength=365 Nr  
of Repeats=7 RepeatLength=52 seed=TTGATGGTTC Num.seqs=7  
Similarity=0.785104  
0 TTGATGGTTCCTATCTCCGAGATAAGTGCCACCAAGATGGAAAATCCACCGC-  
GCF\_000708755.2\_ASM70875v2\_genomic.fna\_6:153329-153693 Satlength=365 Nr  
of Repeats=7 RepeatLength=52 seed=GATAAGTGCC Num.seqs=7  
Similarity=0.846154  
20 TTGATGGTTCGAACTCAGAGATAAGTGCCACCAAAAAGGATATTCCTCCGT-  
GCF\_000709935.2\_ASM70993v2\_genomic.fna\_15:70593-70957 Satlength=365 Nr of  
Repeats=7 RepeatLength=52 seed=TTGATGGTTC Num.seqs=7 Similarity=0.829060  
52 TTGATGGTTCGAACTCAGAGATAAGTGCCACCAAAAATGATATTCCTCCGT-  
GCF\_000708755.2\_ASM70875v2\_genomic.fna\_22:240402-240610 Satlength=209 Nr  
of Repeats=4 RepeatLength=52 seed=GCTTGATGGT Num.seqs=4  
Similarity=0.773504  
50 TTGATGGTACCGAACTCGGAGATAAGTGCCATCAAACCGGAAAA-CCGCTGGC  
GCF\_000709935.2\_ASM70993v2\_genomic.fna\_24:351132-351644 Satlength=513 Nr  
of Repeats=10 RepeatLength=52 seed=GAGATAAGTG Num.seqs=8  
Similarity=0.879605 70  
TTGATGGTTCGAACTCGGAGATAAGTGCCATCAAACGGGAGAA-ACGCTGGC  
Rev.of\_GCF\_000708755.2\_ASM70875v2\_genomic.fna\_1:387582-387842  
Satlength=261 Nr of Repeats=5 RepeatLength=52 seed=GGAACCATCA Num.seqs=5  
Similarity=0.838462 11  
TTGATGGTTCCTATCTCACCAGATAAGTGCCATCAAATCAGATTTCCTCCGCGT-  
Rev.of\_GCF\_000709935.2\_ASM70993v2\_genomic.fna\_1:408489-408848  
Satlength=360 Nr of Repeats=7 RepeatLength=52 seed=GGAACCATCA Num.seqs=6  
Similarity=0.882051 11  
TTGATGGTTCGATCTCACCAGATAAGTGCCATCAAATCAGATTCTCCGCGC-  
GCF\_000709935.2\_ASM70993v2\_genomic.fna\_1:824423-824735 Satlength=313 Nr  
of Repeats=6 RepeatLength=52 seed=ATAAGTGCCA Num.seqs=6  
Similarity=0.840042  
21 TTGATGGTACCGAACGCACCGATAAGTGCCATCAAACAGAAATCCAACCGC-

\*\*\*\*\* \* \* \* \* \*\*\*\*\* \*\*\* \*\* \* \*  
Consensus:

TTGATGGTtCCgAaCtCagaGATAAGTGCCAtCAAaAcgGAaaatCCnCcGn

>Bacillus\_Fam\_36\_20\_10 Nr. of seq. 10 Alignment length(with gaps) = 26  
Alignment score = 0.611966  
GCF\_001591805.1\_ASM159180v1\_genomic.fna\_23:9242-9347 Satlength=106 Nr of  
Repeats=5 RepeatLength=21 seed=GTTTTGGCTA Num.seqs=5 Similarity=0.668056  
7 TTCAA---G-G-GTTTTGGCTATTT-

Rev.of\_GCF\_001591805.1\_ASM159180v1\_genomic.fna\_27:63705-63986  
 Satlength=282 Nr of Repeats=8 RepeatLength=21 seed=TAGCCAAAAC Num.seqs=5  
 Similarity=0.568056 17  
 TTCNA---G-G-GTTTTGGCTATTT-  
 Rev.of\_GCF\_000508325.1\_BAVI\_1\_genomic.fna\_15:39118-39285 Satlength=168 Nr  
 of Repeats=8 RepeatLength=21 seed=TAGCCAAAAC Num.seqs=7  
 Similarity=0.753247 17  
 TTCAA---GAG-GTTTTGGCTATTT-  
 Rev.of\_GCF\_001591805.1\_ASM159180v1\_genomic.fna\_27:93496-93601  
 Satlength=106 Nr of Repeats=5 RepeatLength=21 seed=TAGCCAAAAC Num.seqs=5  
 Similarity=0.651515 17  
 TTCGAN--G-G-GTTTTGGCTATTT-  
 GCF\_001591805.1\_ASM159180v1\_genomic.fna\_40:28416-28500 Satlength=85 Nr of  
 Repeats=4 RepeatLength=21 seed=TTTTGGCTAT Num.seqs=4 Similarity=0.765700  
 8 TCCAA---G-G-GTTTTGGCTATTTTC  
 GCF\_000508325.1\_BAVI\_1\_genomic.fna\_48:11356-11461 Satlength=106 Nr of  
 Repeats=5 RepeatLength=21 seed=GTTTTGGCTA Num.seqs=5 Similarity=0.647826  
 7 TTCAA---G-GAGTTTTGGCTACTT-  
 GCF\_001591805.1\_ASM159180v1\_genomic.fna\_5:147425-147508 Satlength=84 Nr  
 of Repeats=4 RepeatLength=21 seed=GTTTTGGCTA Num.seqs=3  
 Similarity=0.661616  
 7 TTCGA---N-GAGTTTTGGCTANTT-  
 GCF\_001591805.1\_ASM159180v1\_genomic.fna\_7:49374-49506 Satlength=133 Nr of  
 Repeats=5 RepeatLength=21 seed=TTTGTCTATT Num.seqs=4 Similarity=0.788360  
 9 TCCAA--AG-G-GTTTTGTCTATTT-  
 GCF\_000508325.1\_BAVI\_1\_genomic.fna\_43:5059-5143 Satlength=85 Nr of  
 Repeats=4 RepeatLength=21 seed=TTGGCTATTT Num.seqs=4 Similarity=0.714286  
 10 TTCNA-CCT---GTTTTGGCTATTT-  
 GCF\_000508325.1\_BAVI\_1\_genomic.fna\_87:25255-25339 Satlength=85 Nr of  
 Repeats=4 RepeatLength=21 seed=GTTTTGGCTA Num.seqs=4 Similarity=0.724868  
 28 TCTGA-CCG---GTTTTGGCTATTT-

\*\*\*\*\* \*\*\* \*\* \* \*

Consensus:

GTTTTGGCTAtTTTtCaAgg

>Bacillus\_Fam\_37\_21\_10 Nr. of seq. 10 Alignment length(with gaps) = 24  
 Alignment score = 0.601389  
 GCF\_001636345.1\_ASM163634v1\_genomic.fna\_1:1542440-1542856 Satlength=417  
 Nr of Repeats=20 RepeatLength=21 seed=TTTGATAGGA Num.seqs=18  
 Similarity=0.543615 0  
 TTTGATAGGAAACCCAGG-AA--  
 GCF\_001636345.1\_ASM163634v1\_genomic.fna\_1:847129-847687 Satlength=559 Nr  
 of Repeats=16 RepeatLength=21 seed=TTTGATAGGA Num.seqs=14  
 Similarity=0.627456 0  
 TTTGATAGGAAACNCAGA-AAT--  
 GCF\_001636345.1\_ASM163634v1\_genomic.fna\_1:967178-968025 Satlength=848 Nr  
 of Repeats=23 RepeatLength=21 seed=TTGATAGGAA Num.seqs=20  
 Similarity=0.549379 1  
 TTTGATAGGAAACANNGA-AAT--  
 Rev.of\_GCF\_001636345.1\_ASM163634v1\_genomic.fna\_1:3423391-3423622  
 Satlength=232 Nr of Repeats=11 RepeatLength=21 seed=TTTCCTATCA

```

Num.seqs=11 Similarity=0.678237
12      TTTGATAGGAAACTGAAA-AAT--
Rev.of_GCF_001636345.1_ASM163634v1_genomic.fna_1:3846604-3846688
Satlength=85 Nr of Repeats=4 RepeatLength=21 seed=TCCTATCAA Num.seqs=4
Similarity=0.661376 32
TTTGATAGGAAAAGTNAAA-AAN--
Rev.of_GCF_001636345.1_ASM163634v1_genomic.fna_1:3810945-3811113
Satlength=169 Nr of Repeats=8 RepeatLength=21 seed=TCCTATCAA Num.seqs=8
Similarity=0.608383 10
TTTGATAGGAAAAGNCAGANAAG--
GCF_001636345.1_ASM163634v1_genomic.fna_1:481918-482023 Satlength=106 Nr
of Repeats=5 RepeatLength=21 seed=TTTGATAGGA Num.seqs=5
Similarity=0.630303
0      TTTGATAGGAAAANCGAA-AAN--
GCF_001636345.1_ASM163634v1_genomic.fna_1:1838104-1838250 Satlength=147
Nr of Repeats=7 RepeatLength=21 seed=TTTGATAGGA Num.seqs=6
Similarity=0.705556 0
TTTGATAGGAAAA-CGAA-AATTN
Rev.of_GCF_001636345.1_ASM163634v1_genomic.fna_1:3259418-3259523
Satlength=106 Nr of Repeats=5 RepeatLength=21 seed=TCCTATCAA Num.seqs=5
Similarity=0.533333 10
TTTGATAGGAAAAGCNNT-AAN--
Rev.of_GCF_001636345.1_ASM163634v1_genomic.fna_1:4039943-4040090
Satlength=148 Nr of Repeats=7 RepeatLength=21 seed=TCCTATCAA Num.seqs=7
Similarity=0.639061 11
TTTGATAGGAAAANCGAT-TAA--

```

\*\*\*\*\* \*

Consensus:

TTTGATAGGAAAnncaaaAAn

```

>Bacillus_Fam_38_15_10 Nr. of seq. 10 Alignment length(with gaps) = 15
Alignment score = 0.786667
GCF_000007825.1_ASM782v1_genomic.fna_1:428801-429311 Satlength=511 Nr of
Repeats=27 RepeatLength=15 seed=CCAGAACCGT Num.seqs=22
Similarity=0.802982
0      CCAGAACCGTTACCA
GCF_000496285.1_ASM49628v1_genomic.fna_1:3052985-3053600 Satlength=616 Nr
of Repeats=34 RepeatLength=15 seed=CACCAGAACC Num.seqs=27
Similarity=0.816651 13
CCAGAACCGTTGCCA
GCF_000007845.1_ASM784v1_genomic.fna_1:416172-416412 Satlength=241 Nr of
Repeats=11 RepeatLength=15 seed=CCAGAACCGT Num.seqs=7
Similarity=0.881481
0      CCAGAACCGTTGCCG
Rev.of_GCF_000290995.1_Baci_cere_AND1407_G13175_V1_genomic.fna_5:83347-
83542 Satlength=196 Nr of Repeats=8 RepeatLength=15 seed=TGGTTCTGGT
Num.seqs=5 Similarity=0.893333 9
CCAGAACCATTGCCA
GCF_000775975.1_ASM77597v1_genomic.fna_1:4964492-4964898 Satlength=407 Nr
of Repeats=25 RepeatLength=15 seed=TGCCACCAGA Num.seqs=23
Similarity=0.846113 10
CCAGAACCATTGCCA

```

Rev.of\_GCF\_000832605.1\_ASM83260v1\_genomic.fna\_1:71948-72608 Satlength=661  
 Nr of Repeats=38 RepeatLength=15 seed=TCTGGTGGCA Num.seqs=32  
 Similarity=0.872043 20  
 CCAGAACCATTGCCA  
 GCF\_000831065.1\_ASM83106v1\_genomic.fna\_1:282158-282248 Satlength=91 Nr of  
 Repeats=6 RepeatLength=15 seed=TGCCACCAGA Num.seqs=6 Similarity=0.733333  
 10 CCAGAGCCGTTGCCA  
 Rev.of\_GCF\_001645555.1\_ASM164555v1\_genomic.fna\_5:1617-1782 Satlength=166  
 Nr of Repeats=8 RepeatLength=15 seed=TCTGGTGGCA Num.seqs=6  
 Similarity=0.845926 5  
 CCAGAACCCTGCCA  
 GCF\_000831065.1\_ASM83106v1\_genomic.fna\_1:282271-282451 Satlength=181 Nr  
 of Repeats=8 RepeatLength=15 seed=GAACCGTTAC Num.seqs=5  
 Similarity=1.000000  
 3 CCGGAACCGTTACCG  
 GCF\_001439635.1\_ASM143963v1\_genomic.fna\_175:41594-41820 Satlength=227 Nr  
 of Repeats=15 RepeatLength=15 seed=ATTGCCAGCT Num.seqs=14  
 Similarity=0.948230 8  
 GCTGACCCATTGCCA

\* \* \* \* \*

Consensus:

CCaGAaCCgTTgCCa

>Bacillus\_Fam\_39\_81\_9 Nr. of seq. 9 Alignment length(with gaps) = 83  
 Alignment score = 0.715640  
 GCF\_000196735.1\_ASM19673v1\_genomic.fna\_1:1355402-1356375 Satlength=974 Nr  
 of Repeats=13 RepeatLength=81 seed=AGCAAAATTCATTCATGGGGAAAGTGGACGAAATCG  
 Similarity=0.779313 0  
 AGCAAA-  
 TTCAGCCCGAAACGATATTAACAGAACTGGATAAGTTCACAACCTCATTTCATGGGGAAAGTGGACGAAATCG  
 -CA  
 GCF\_000769555.1\_ASM76955v1\_genomic.fna\_1:1225964-1227098 Satlength=1135  
 Nr of Repeats=13 RepeatLength=81 seed=GCAAAATTCAG Num.seqs=12  
 Similarity=0.748152 1  
 AGCAAA-  
 TTCAGCCCGAAACGATATTAGCAGAACTGGATAAGTTCACAACNTCATTTCATGGGAAAAGTAGACGAAATCG  
 -CN  
 GCF\_000204275.1\_ASM20427v1\_genomic.fna\_1:1272554-1273283 Satlength=730 Nr  
 of Repeats=9 RepeatLength=81 seed=AAATTCAGTC Num.seqs=9  
 Similarity=0.677599 3  
 AGCAAA-  
 TTCAGTCCNGAAACGATATTAACAGAGCTGGATAAATTCACGACCTCATTTCATGGGGAAAGTNGACGANATCG  
 -CN  
 Rev.of\_GCF\_000262045.1\_KCTC\_13613\_01\_genomic.fna\_13:664127-664856  
 Satlength=730 Nr of Repeats=9 RepeatLength=81 seed=GGACTGAATT Num.seqs=7  
 Similarity=0.675630 14  
 AGCAAA-  
 TTCAGTCCGAAACNATTTTAACCGAGCTGGATAAGTTCACGACNTCATTTATGGGAAAAGTGGACGANATCG  
 -CN  
 GCF\_001584325.1\_ASM158432v1\_genomic.fna\_36:27-513 Satlength=487 Nr of  
 Repeats=5 RepeatLength=81 seed=GCAAAATTCAG Num.seqs=4 Similarity=0.690041  
 0 -GCAAA-



TTCAGCCCGGAATCAATATTAAAAGAACTGGACAAATTTACGGCTTCATTTATGAAAAAATAGACGACATCG  
TCA

CAAAGTTCAGTCCGGAAACNATTCTNAAACAGCTGGATAAGTTCACAACATCATTTATGAGAAAAGTGGATGC  
AATCG-CA

33           A-  
CAAAGTTCAGTCCAGANACGATTTTGACAGAGCTGGATAAGTTTACAACATCGTTTATGAGTAAGGTGGATGC  
AATTG-CG

112        A-  
CGAAGTTCAGTCCAGAAACGATTTTGTGCGAGCTGGATAAATTTACAACATCGTTCATGAGTAAAGTGGACGC  
AATTG-CN

169  
AGCAAANTTCAGTCCAGAAACGATTTTGNCGCAGCTGGATAAGTTTACAACATCGTTCATGAGTAAAGTGGAC  
GCAATCG-CA

Consensus :

```
>Bacillus Fam 40 52 9   Nr. of seq. 9 Alignment length(with gaps) = 58
```

GCF\_000169195.2\_ASM16919v2\_genomic.fna 1:960957-961477 Satlength=521 Nr

Similarity=0.839316

TCTTTTGTCTTTTGTAGCCCTCC-A-AAAGGACAATTCGCCC-CT-GAT-C-CGGCTC

Satlength=625 Nr of Repeats=12 RepeatLength=52 seed=TCAAAAAGAC

16 TCTTTTGTCTTTTGTGAGCTCTCC-A-AAAGGACAATTTGCTC-CT-GGT-C-CGGCTT

Satlength=989 Nr of Repeats=19 RepeatLength=52 seed=AAAAGACAAA

65 TCTTTTGTCTTTTGTGAGCCCTCC-A-AAAAGACAATTTGCTC-CT-GGT-C-CGGCTC

SatLength=625 Nr of Repeats=12 RepeatLength=52 seed=AAAGACAAAA

12 TCTTTTGTCTTTTGANACCCCC-A-AAAGGACAATTTG-CC-CG-GGTNC-CAGCTT

GC1\_000105195.2\_ASM105195v2\_genomic.tla\_1:585575-590455 Sat  
of Repeats=10 RepeatLength=53 seed=CTTTTGTCTT Num segs=10

Similarity=0.599686 54  
TCTTTTGTCTTTTGAACCTCC-A-AAAGGACAATTTGCCC-CG-GATNC-CAGCTC  
Rev.of\_GCF\_000832905.1\_ASM83290v1\_genomic.fna\_1:88046-88410 Satlength=365  
Nr of Repeats=7 RepeatLength=52 seed=AAAAGGACAA Num.seqs=5  
Similarity=0.769811 13  
-CTTTTGTCTTTTGAATACTCC-A-AAAGGACANTTTGCTC-CG-GTT-CATGGCTC  
Rev.of\_GCF\_000832905.1\_ASM83290v1\_genomic.fna\_1:2689393-2690174  
Satlength=782 Nr of Repeats=15 RepeatLength=52 seed=AAAGACAAAA  
Num.seqs=14 Similarity=0.488918  
12 TCTTTTGTCTTTTGTATACCTCCGATGAAGGACANTTTGCNN-CGNGGT-C-CGNCCTC  
Rev.of\_GCF\_000217835.1\_ASM21783v1\_genomic.fna\_1:298642-299112  
Satlength=471 Nr of Repeats=9 RepeatLength=52 seed=AAATGTCCTT Num.seqs=7  
Similarity=0.657848 35  
GCTTTTGTCTTTTGAANCCTCC-A-AAAGGACATTTTCGANCACT--AC-C-CGGGCC  
Rev.of\_GCF\_000832905.1\_ASM83290v1\_genomic.fna\_1:2653134-2654217  
Satlength=1084 Nr of Repeats=20 RepeatLength=52 seed=AAATGTCCTT  
Num.seqs=18 Similarity=0.450699  
35 CCTTTTGTCTTTTGAACCCTCC-A-AAAGGACATTTTCGATCACT--GN-C-CGGGTC

\*\*\*\*\* \* \* \* \* \*  
Consensus:

tCTTTTGTCTTTTGAAnnCCTCCAAAGGACAaTTtGcnCCtggtCCgGcTc

>Bacillus\_Fam\_41\_51\_9 Nr. of seq. 9 Alignment length(with gaps) = 57  
Alignment score = 0.622157  
GCF\_000292245.2\_ASM29224v2\_genomic.fna\_34:46830-47085 Satlength=256 Nr of  
Repeats=5 RepeatLength=51 seed=TTTTTTATTA Num.seqs=5 Similarity=0.853595  
0 TTTTTTATTACTTATTACT-GGTTTTTCGCACCGTAATTTT---NACT-GGCT-GGC  
Rev.of\_GCF\_000292245.2\_ASM29224v2\_genomic.fna\_38:11355-11712  
Satlength=358 Nr of Repeats=7 RepeatLength=51 seed=GTAATGAAAA Num.seqs=7  
Similarity=0.776580 11  
TTTTTCATTACTTATTACG-GGTTTTTCGCNCCTTAATTTG---GACT-GGCT-GGC  
GCF\_000292245.2\_ASM29224v2\_genomic.fna\_52:29439-29796 Satlength=358 Nr of  
Repeats=7 RepeatLength=51 seed=TTTTTCATTA Num.seqs=7 Similarity=0.895425  
0 TTTTTCATTAACCTA-TCCTCACTTTTTTCGCACCGTAATTTT---GCCT--GCTCGGC  
Rev.of\_GCF\_000292245.2\_ASM29224v2\_genomic.fna\_57:27020-27280  
Satlength=261 Nr of Repeats=5 RepeatLength=51 seed=GTAATGAAAA Num.seqs=4  
Similarity=0.610063 11  
TTTTTCATTACCTATTCTCA-TTTTTTCGCACCGTAATTTT---GCCTCAGCATGGC  
GCF\_000292245.2\_ASM29224v2\_genomic.fna\_61:1751-1955 Satlength=205 Nr of  
Repeats=4 RepeatLength=51 seed=TTTTCATTA Num.seqs=4 Similarity=0.656061  
1 TTTTTCATTAACCTA-TCCGCCCTTTTTTCGCACCTAATTTG---GCCC--ACTCTCC  
Rev.of\_GCF\_000292245.2\_ASM29224v2\_genomic.fna\_66:18-323 Satlength=306 Nr  
of Repeats=6 RepeatLength=51 seed=GTAATGAAAA Num.seqs=5  
Similarity=0.724359  
11 TTTTTCATTAACCTATTACACTNTTTTTCGCACCTAATTTG---GCCN--GCTCNCC  
GCF\_000292245.2\_ASM29224v2\_genomic.fna\_80:17413-17718 Satlength=306 Nr of  
Repeats=6 RepeatLength=51 seed=TTTCATTACC Num.seqs=5 Similarity=0.869281  
2 TTTTTCATTAACCTA-TTACCCTTTTTTCGCACCTAATTTG---GCAT--TCACCGC  
GCF\_000292245.2\_ASM29224v2\_genomic.fna\_53:28960-29215 Satlength=256 Nr of  
Repeats=4 RepeatLength=51 seed=CGGCTTTTTT Num.seqs=3 Similarity=0.912854  
47 TTTTTCATTAACCTA-TCTCAAGTTTTTCGCACTCTAATTTG---ACCT--GCTCGGC

GCF\_000292245.2\_ASM29224v2\_genomic.fna\_5:9-315 Satlength=307 Nr of  
Repeats=6 RepeatLength=51 seed=TTTTTCATTAC Num.seqs=6 Similarity=0.673939  
52 TTTTTCATTACCTA-TCCCAAGTTTTTCGCACTCTAATTTGCNCACCT--GCTCGAC

\*\*\*\*\* \*\* \* \*\*\*\*\* \* \*\*\*\*\* \* \*

Consensus:

TTTTTCATTACcTATcCncnnTTTTTCGCACcnTAATTTggcCtgCtcggC

>Bacillus\_Fam\_42\_53\_9 Nr. of seq. 9 Alignment length(with gaps) = 56  
Alignment score = 0.615245  
GCF\_000181495.1\_ASM18149v1\_genomic.fna\_69:3432-3803 Satlength=372 Nr of  
Repeats=6 RepeatLength=53 seed=CGACCCAACA Num.seqs=5 Similarity=0.749383  
0 CGACCCAACAACCATTCAATA-ATC-CATTCTCCTTGGCCCGATTACNCCCT-TTT  
GCF\_000181495.1\_ASM18149v1\_genomic.fna\_112:1323-1747 Satlength=425 Nr of  
Repeats=8 RepeatLength=53 seed=CGCCCTATTC Num.seqs=6 Similarity=0.775262  
44 CGACCCAACATCCCCTCTATA-AGC-CAATCTCCTTGGATTGATTACGCCCT-ATT  
Rev.of\_GCF\_000181495.1\_ASM18149v1\_genomic.fna\_151:10383-10754  
Satlength=372 Nr of Repeats=7 RepeatLength=53 seed=ACCAGTGAGA Num.seqs=7  
Similarity=0.857442 37  
CANACCAACATCCCCTTCCATA-ATC-CGTTCTCACTGGTCTGTTTACTCTCT-TTT  
Rev.of\_GCF\_000181495.1\_ASM18149v1\_genomic.fna\_170:36099-36417  
Satlength=319 Nr of Repeats=6 RepeatLength=53 seed=GATGTTGGTC Num.seqs=6  
Similarity=0.847379 65  
CAGACCAACATCCCCTTCCATC-ATC-CGTTCTCATTGGTTTATTTACTNCCT-TTT  
Rev.of\_GCF\_000181495.1\_ASM18149v1\_genomic.fna\_186:370855-371491  
Satlength=637 Nr of Repeats=9 RepeatLength=53 seed=TGAAAAGGGA Num.seqs=6  
Similarity=0.812159 55  
CAAACCAACATCCCCTCACATA-ATC-CATTCTCATTGGTCTGATTACTCCCT-TTT  
GCF\_000181495.1\_ASM18149v1\_genomic.fna\_143:4307-4677 Satlength=371 Nr of  
Repeats=7 RepeatLength=53 seed=CGTTTACTCC Num.seqs=6 Similarity=0.931237  
38 CGCACCAACACCCCTC-CAAA-ATTTTCATTCTCATTGGGCCGTTTACTCCCT-TTT  
Rev.of\_GCF\_000181495.1\_ASM18149v1\_genomic.fna\_185:152078-153191  
Satlength=1114 Nr of Repeats=21 RepeatLength=53 seed=GAGTAAACGA  
Num.seqs=21 Similarity=0.835626  
47 CGACCCAACATCTCTC-CAAA-ATTTCAATCTCATTGGGTCGTTTACTCCCT-TTT  
Rev.of\_GCF\_000181495.1\_ASM18149v1\_genomic.fna\_186:315613-316090  
Satlength=478 Nr of Repeats=9 RepeatLength=53 seed=CAATGAGATT Num.seqs=7  
Similarity=0.858613 88  
CACACCAACATC-CTCACAAAGATT-CAATCTCATTGGGCTGATTAGTCCGT-TTT  
GCF\_000181495.1\_ASM18149v1\_genomic.fna\_185:82017-82493 Satlength=477 Nr  
of Repeats=9 RepeatLength=53 seed=TTTCACACCA Num.seqs=8  
Similarity=0.806878  
104 CACACCAACTTC-CTCACAAA-ATTCCATTCTCATCGGGGTGATTAGTCCGTCTTT

\* \*\*\*\*\* \* \* \* \* \*\*\*\*\* \*\* \*\*\* \* \*\*

Consensus:

CanaCCAACAtCcCTcncAtAATcCatTCTCaTTGGnctGaTTActCCcTTTT

>Bacillus\_Fam\_43\_53\_9 Nr. of seq. 9 Alignment length(with gaps) = 56  
Alignment score = 0.632275  
GCF\_000813125.1\_ASM81312v1\_genomic.fna\_101:16844-17056 Satlength=213 Nr  
of Repeats=4 RepeatLength=53 seed=GGGCTGCATA Num.seqs=4



GCF\_000331575.1\_ASM33157v1\_genomic.fna\_1:244438-244999 Satlength=562 Nr of Repeats=11 RepeatLength=51 seed=TTTTGCTGAT Num.seqs=11  
 Similarity=0.932501 1  
 GTTTTGCTGATAGTAAATCCTT-TTTATCGTCAGCAAATTGAGGA-TCGCGAC-  
 Rev.of\_GCF\_000331575.1\_ASM33157v1\_genomic.fna\_2:526077-526485  
 Satlength=409 Nr of Repeats=8 RepeatLength=51 seed=ATCAGCAAAA Num.seqs=8  
 Similarity=0.831158 11  
 GTTTTGCTGATAGTAAATCCGT-TTTATCGTCAGCAAATTGAGGA-TCGCTCC-  
 GCF\_000331575.1\_ASM33157v1\_genomic.fna\_1:651421-651726 Satlength=306 Nr of Repeats=6 RepeatLength=51 seed=GTTTTGCTGA Num.seqs=5  
 Similarity=0.853595  
 51 GTTTTGCTGATCGTAAATCCTT-TTTATCGTCAGCAAATCCAGTC-TCACGCC-  
 Rev.of\_GCF\_000331575.1\_ASM33157v1\_genomic.fna\_2:25217-25727 Satlength=511  
 Nr of Repeats=10 RepeatLength=51 seed=AAAAGGATTT Num.seqs=10  
 Similarity=0.957008 75  
 GTTTTGCTGATAGTAAATCCTT-TTTATCGTCAGCAAATCCAGTC-TCACGCC-  
 Rev.of\_GCF\_000331575.1\_ASM33157v1\_genomic.fna\_2:599172-599835  
 Satlength=664 Nr of Repeats=13 RepeatLength=51 seed=TATCAGCAAA  
 Num.seqs=13 Similarity=0.884699  
 12 ATTTTGCTGATAATAAATCCAT-TTTATCGTCAGCAAATCGAGCA-TCACACC-  
 Rev.of\_GCF\_000331575.1\_ASM33157v1\_genomic.fna\_2:632825-633284  
 Satlength=460 Nr of Repeats=9 RepeatLength=51 seed=ATTTGGTGAC Num.seqs=9  
 Similarity=0.936093 38  
 GTTTTGCTGATAGTAAATCCGT-TTTATCGTCACCAAATCGAAAATTCA-ATC-

\*\*\*\*\* \* \* \* \*  
 Consensus:

GTTTTGCTGATAGTAAAtCCtTTTTATCGTCAGCAAAAtcgAGnaTcaCgnC

>Bacillus\_Fam\_45\_52\_9 Nr. of seq. 9 Alignment length(with gaps) = 53  
 Alignment score = 0.615129  
 GCF\_000169195.2\_ASM16919v2\_genomic.fna\_1:320228-320592 Satlength=365 Nr of Repeats=7 RepeatLength=52 seed=GATGAAGGAC Num.seqs=5  
 Similarity=0.739623  
 0 GATGAAGGACAATTNGGCTTTNCCAGNCCNGTGTTTTGTCCTTCATCACCTC-  
 Rev.of\_GCF\_000217835.1\_ASM21783v1\_genomic.fna\_1:922243-922973  
 Satlength=731 Nr of Repeats=14 RepeatLength=52 seed=TGTCCTTCAT  
 Num.seqs=10 Similarity=0.774144  
 11 GATGAAGGACAATTTGGCTTTGCCAGGCCTGTGTTTTGTCCTTCATCACC-CN  
 Rev.of\_GCF\_000169195.2\_ASM16919v2\_genomic.fna\_1:2537506-2537922  
 Satlength=417 Nr of Repeats=8 RepeatLength=52 seed=GTCCTTCATA Num.seqs=8  
 Similarity=0.715939 10  
 TATGAAGGACAGTTCGTCGTTTCCTGGCCGGTGTTTTGTCTTCATCGGC-CC  
 GCF\_000169195.2\_ASM16919v2\_genomic.fna\_1:2655058-2655318 Satlength=261 Nr of Repeats=5 RepeatLength=52 seed=ATGAAGGACA Num.seqs=5  
 Similarity=0.637107 53  
 TATGAAGGACATTTGCCGTTTGCCGGCACNTGTTTTGTCTTCATCATN-CT  
 GCF\_001591485.1\_ASM159148v1\_genomic.fna\_63:10648-10908 Satlength=261 Nr of Repeats=5 RepeatLength=52 seed=TTTCCTTTT Num.seqs=5  
 Similarity=0.820513  
 12 AATGAAGGACAATTTCTTTTTTCAANCCCCGGATTTGTCCTTCATCGCC-CC  
 GCF\_000169195.2\_ASM16919v2\_genomic.fna\_1:990416-990781 Satlength=366 Nr of Repeats=6 RepeatLength=52 seed=ATGAAAGACA Num.seqs=4

Similarity=0.790598  
 1 GATGAAAGACATTTGCTGCCCCGACACCTCTCTTTTGTCTTCATCACC-CC  
 Rev.of\_GCF\_000217835.1\_ASM21783v1\_genomic.fna\_1:327095-327408  
 Satlength=314 Nr of Repeats=5 RepeatLength=52 seed=GTCTTTTCAT Num.seqs=3  
 Similarity=0.760684 11  
 GATGAAAGACATTTGCTGCTGCGGACCTCNCCTTTTGTCTTCATCACC-CC  
 Rev.of\_GCF\_000832905.1\_ASM83290v1\_genomic.fna\_1:2689111-2689632  
 Satlength=522 Nr of Repeats=10 RepeatLength=52 seed=AATGTCCTTC  
 Num.seqs=9 Similarity=0.772792  
 13 GATGAAGGACATTTGCGCCCGGACGCCCCCTCTTTTGTCTTCATCACC-CC  
 GCF\_000169195.2\_ASM16919v2\_genomic.fna\_1:2031833-2032093 Satlength=261 Nr  
 of Repeats=5 RepeatLength=52 seed=GTCTTCAT Num.seqs=5  
 Similarity=0.874359 36  
 GATGAAGGACATTTGCTTGCAAGGGAGCCGGTGATTTGTCTTCATAACC-GT

\*\*\*\*\* \*\* \* \*\*\*\*\*  
 Consensus:

gATGAAGGACATTTGCTGCGGACGCCCCCTCTTTTGTCTTCATCACC

>Bacillus\_Fam\_46\_36\_9 Nr. of seq. 9 Alignment length(with gaps) = 36  
 Alignment score = 0.777263  
 GCF\_000715205.1\_SOAPdenovo\_v1.05\_genomic.fna\_90:66-390 Satlength=325 Nr  
 of Repeats=8 RepeatLength=36 seed=ATCTCCGGTA Num.seqs=6  
 Similarity=0.822222  
 0 ATCTCCGGTAACACCTGTAGCGCCAGTAGAACCAGT  
 GCF\_001038845.1\_ASM103884v1\_genomic.fna\_31:5-185 Satlength=181 Nr of  
 Repeats=4 RepeatLength=36 seed=CCAGTTACAC Num.seqs=3 Similarity=0.834835  
 4 ATCACCAGTTACACAGTGGCNCCTAGGACCGGT  
 GCF\_001457015.1\_ASM145701v1\_genomic.fna\_2:17-395 Satlength=379 Nr of  
 Repeats=10 RepeatLength=36 seed=GTATCTCCAG Num.seqs=8  
 Similarity=0.850529  
 25 TACACCAGTGGCACCAGTAGGNCCAGTATCTCCAGT  
 GCF\_001896335.1\_ASM189633v1\_genomic.fna\_5:59-1301 Satlength=1243 Nr of  
 Repeats=31 RepeatLength=36 seed=GTATCTCCAG Num.seqs=19  
 Similarity=0.797488  
 25 TACACCAGTGGCACCAGTAGGTCCNGTATCTCCAGT  
 GCF\_001896335.1\_ASM189633v1\_genomic.fna\_49:56-272 Satlength=217 Nr of  
 Repeats=6 RepeatLength=36 seed=GTATCTCCAG Num.seqs=6 Similarity=0.834568  
 25 TACACCAGTGGCACCAGTAGGTCCAGTATCTCCAGT  
 GCF\_001896335.1\_ASM189633v1\_genomic.fna\_54:44-188 Satlength=145 Nr of  
 Repeats=4 RepeatLength=36 seed=GTATCTCCAG Num.seqs=4 Similarity=0.839506  
 25 TACACCAGTGGCACCAGTAGGTCCAGTATCTCCAGT  
 Rev.of\_GCF\_001896335.1\_ASM189633v1\_genomic.fna\_52:35-170 Satlength=136 Nr  
 of Repeats=4 RepeatLength=36 seed=ACTGGAGATA Num.seqs=3  
 Similarity=0.876543 36  
 TACACCAGTGGCACCAGTAGGTCCGGTATCTCCAGT  
 GCF\_001457015.1\_ASM145701v1\_genomic.fna\_5:226551-227512 Satlength=962 Nr  
 of Repeats=13 RepeatLength=36 seed=GTATCTCCAG Num.seqs=8  
 Similarity=0.828042 25  
 TACACCAGTNGCACCAGTAGGTCCAGTATCACCAGT  
 Rev.of\_GCF\_001896335.1\_ASM189633v1\_genomic.fna\_8:50-437 Satlength=388 Nr  
 of Repeats=10 RepeatLength=36 seed=CCTACCGGTG Num.seqs=6

Similarity=0.832099  
AACACCAGTNGCACCGGTAGGTCCAGTATCTCCAGT

57

\* \*\* \* \* \*\*\*\* \* \* \*\* \* \* \*\* \*

Consensus:

taCACCACTggCACCGGTAGgtCCaGTAtctCCAGT

>Bacillus\_Fam\_47\_21\_9 Nr. of seq. 9 Alignment length(with gaps) = 24  
Alignment score = 0.626157  
GCF\_001578185.1\_ASM157818v1\_genomic.fna\_1:1878234-1879214 Satlength=981  
Nr of Repeats=38 RepeatLength=21 seed=CACGAGTAAA Num.seqs=27  
Similarity=0.615271 0  
-CACGAGTAAA--TAGC-CAAAAT  
Rev.of\_GCF\_001273755.1\_ASM127375v1\_genomic.fna\_17:4099551-4099980  
Satlength=430 Nr of Repeats=21 RepeatLength=21 seed=TTTACTCGTG  
Num.seqs=13 Similarity=0.817405  
10 -CACGAGTAAA-GCAGC-CAAACT  
Rev.of\_GCF\_001578185.1\_ASM157818v1\_genomic.fna\_1:3721377-3721608  
Satlength=232 Nr of Repeats=11 RepeatLength=21 seed=TTTACTCGTG  
Num.seqs=11 Similarity=0.805785  
30 -CACGAGTAAA-GCGCC-CAAACT  
GCF\_001273755.1\_ASM127375v1\_genomic.fna\_17:4304916-4305337 Satlength=422  
Nr of Repeats=20 RepeatLength=21 seed=TCACGAGTAA Num.seqs=15  
Similarity=0.793507 0  
TCACGAGTAAA--TTGCTCAAAC-  
GCF\_001578185.1\_ASM157818v1\_genomic.fna\_1:4390176-4390628 Satlength=453  
Nr of Repeats=15 RepeatLength=21 seed=TCACGAGTAA Num.seqs=12  
Similarity=0.732553 0  
TCACGAGTAAA--CTGCTNAAAC-  
GCF\_001578185.1\_ASM157818v1\_genomic.fna\_1:4868615-4868909 Satlength=295  
Nr of Repeats=14 RepeatLength=21 seed=CGAGTAAACA Num.seqs=14  
Similarity=0.891156 3  
TCACGAGTAAA--CAGCTCAAAC-  
GCF\_001578185.1\_ASM157818v1\_genomic.fna\_1:1732763-1732929 Satlength=167  
Nr of Repeats=7 RepeatLength=21 seed=CACGAGTAAA Num.seqs=5  
Similarity=0.746032 1  
TCACGAGTAAA--GTGCNCAAAT-  
Rev.of\_GCF\_001578185.1\_ASM157818v1\_genomic.fna\_1:4121151-4122285  
Satlength=1135 Nr of Repeats=50 RepeatLength=21 seed=TTTACTCGTG  
Num.seqs=41 Similarity=0.780101  
11 TCACGAGTAAA--AGGCTCAAAT-  
Rev.of\_GCF\_001578185.1\_ASM157818v1\_genomic.fna\_1:4151346-4151430  
Satlength=85 Nr of Repeats=4 RepeatLength=21 seed=TTTACTCGTG Num.seqs=4  
Similarity=0.681159 11  
TCACGAGTAAACTAGGCTGAAAT-

\*\*\*\*\* \* \*\*\*

Consensus:

tCACGAGTAAAnnGCTcAAAc

>Bacillus\_Fam\_48\_21\_9 Nr. of seq. 9 Alignment length(with gaps) = 23  
Alignment score = 0.644525

GCF\_000508325.1\_BAVI\_1\_genomic.fna\_68:3560-3643 Satlength=84 Nr of Repeats=4 RepeatLength=21 seed=ATTCGCTAAT Num.seqs=3 Similarity=0.537778  
 0 ATTCGCTAAT-AAACCCTCN-A-  
 Rev.of\_GCF\_000508325.1\_BAVI\_1\_genomic.fna\_103:18741-18824 Satlength=84 Nr of Repeats=4 RepeatLength=21 seed=TTATTAGCGA Num.seqs=3  
 Similarity=0.640212 12  
 ATTCGCTAAT-AAACNNTCN-AG  
 Rev.of\_GCF\_001591805.1\_ASM159180v1\_genomic.fna\_12:67671-67793  
 Satlength=123 Nr of Repeats=5 RepeatLength=21 seed=TATTAGCGAA Num.seqs=3  
 Similarity=0.597884 32  
 ATTCGCTAAT-AAACNNNCN-AG  
 GCF\_000508325.1\_BAVI\_1\_genomic.fna\_94:20272-20356 Satlength=85 Nr of Repeats=4 RepeatLength=21 seed=ATTCGCTGAT Num.seqs=4 Similarity=0.557971  
 0 ATTCGCTGATAAAACCCTCG-A-  
 GCF\_000508325.1\_BAVI\_1\_genomic.fna\_98:31365-31448 Satlength=84 Nr of Repeats=4 RepeatLength=21 seed=ATTCGCTAAT Num.seqs=3 Similarity=0.671498  
 0 ATTCGCTAAT-AAACTNGCA-A-  
 Rev.of\_GCF\_000508325.1\_BAVI\_1\_genomic.fna\_119:10301-10384 Satlength=84 Nr of Repeats=4 RepeatLength=21 seed=TTTATTAGCG Num.seqs=3  
 Similarity=0.661616 13  
 ATTCGCTAAT-AAACATGGA-AG  
 Rev.of\_GCF\_001591805.1\_ASM159180v1\_genomic.fna\_1:35221-35304 Satlength=84 Nr of Repeats=4 RepeatLength=21 seed=TTTATTAGCG Num.seqs=3  
 Similarity=0.661616 13  
 ATTCGCTAAT-AAACTTGGA-AG  
 Rev.of\_GCF\_001591805.1\_ASM159180v1\_genomic.fna\_12:66529-66612  
 Satlength=84 Nr of Repeats=4 RepeatLength=21 seed=TTTATTAGCG Num.seqs=3  
 Similarity=0.626263 13  
 ATTCGCTAAT-AAATNTGGA-AG  
 GCF\_001591665.1\_ASM159166v1\_genomic.fna\_53:46428-46511 Satlength=84 Nr of Repeats=4 RepeatLength=21 seed=ATTCGCTAAT Num.seqs=3 Similarity=0.545455  
 0 ATTCGCTAAT-AAACTNNNAGA-

\*\*\*\*\* \*\* \*\*\* \*

Consensus:

ATTCGCTAATAAACnnncaAg

>Bacillus\_Fam\_49\_21\_9 Nr. of seq. 9 Alignment length(with gaps) = 22  
 Alignment score = 0.671296  
 GCF\_001273755.1\_ASM127375v1\_genomic.fna\_17:3993724-3993858 Satlength=135  
 Nr of Repeats=5 RepeatLength=21 seed=TTACTCGTGA Num.seqs=4  
 Similarity=0.746032 12  
 AATTC-CGAGCATTTACTCGTG  
 Rev.of\_GCF\_001578185.1\_ASM157818v1\_genomic.fna\_1:724068-724640  
 Satlength=573 Nr of Repeats=21 RepeatLength=21 seed=AATTCACGAG  
 Num.seqs=13 Similarity=0.733683  
 25 AATTT-NGAGCAAATACTCGTG  
 Rev.of\_GCF\_001578185.1\_ASM157818v1\_genomic.fna\_1:4101854-4102160  
 Satlength=307 Nr of Repeats=15 RepeatLength=21 seed=TCACGAGTAT  
 Num.seqs=10 Similarity=0.964727  
 43 AGTTT-GGAGCAAATACTCGTG  
 GCF\_001578185.1\_ASM157818v1\_genomic.fna\_1:2283060-2283368 Satlength=309  
 Nr of Repeats=9 RepeatLength=21 seed=TACTCGTGAA Num.seqs=7



Similarity=0.696248 13  
 ANATT-NGTGCATTTACTCGTG  
 GCF\_001578185.1\_ASM157818v1\_genomic.fna\_1:4201354-4201438 Satlength=85 Nr  
 of Repeats=4 RepeatLength=21 seed=ATTTACTCGT Num.seqs=4  
 Similarity=0.737374 32  
 AATTTNAGTGCATTTACTCGTG  
 GCF\_001578185.1\_ASM157818v1\_genomic.fna\_1:4254210-4254294 Satlength=85 Nr  
 of Repeats=4 RepeatLength=21 seed=TTTACTCGTG Num.seqs=4  
 Similarity=0.737374 33  
 AATTTTGAAGCATTTACTCGTG  
 Rev.of\_GCF\_001578185.1\_ASM157818v1\_genomic.fna\_1:4716658-4716888  
 Satlength=231 Nr of Repeats=11 RepeatLength=21 seed=CTCACGAGTA  
 Num.seqs=8 Similarity=0.770975  
 23 AGTTT-GGTTTCGTTTACTCGTG  
 GCF\_001578185.1\_ASM157818v1\_genomic.fna\_1:5100829-5100974 Satlength=146  
 Nr of Repeats=7 RepeatLength=21 seed=TTTACTCGTG Num.seqs=6  
 Similarity=0.655556 32  
 AATTT-NGTGCATTTACTCGTG  
 GCF\_001273755.1\_ASM127375v1\_genomic.fna\_17:4575317-4575422 Satlength=106  
 Nr of Repeats=5 RepeatLength=21 seed=TTTACTCGTG Num.seqs=5  
 Similarity=0.726984 32  
 AATTA-GATGGATTTACTCGTG

\*\*\*\*\* \*

Consensus:

tTACTCGTGAAaTTtngtGCat

>Bacillus\_Fam\_50\_18\_9 Nr. of seq. 9 Alignment length(with gaps) = 21  
 Alignment score = 0.615520  
 GCF\_000007825.1\_ASM782v1\_genomic.fna\_1:1257786-1258002 Satlength=217 Nr  
 of Repeats=11 RepeatLength=18 seed=CAAAAGAAAG Num.seqs=10  
 Similarity=0.878189 0  
 CAAAAGAAAG--CAGAAGAA-  
 GCF\_000496285.1\_ASM49628v1\_genomic.fna\_1:3845536-3845770 Satlength=235 Nr  
 of Repeats=13 RepeatLength=18 seed=AGAAGAACAG Num.seqs=13  
 Similarity=0.914530 11  
 CAGAAGAAAG--TAGAAGAA-  
 GCF\_000831065.1\_ASM83106v1\_genomic.fna\_1:1083186-1083312 Satlength=127 Nr  
 of Repeats=7 RepeatLength=18 seed=GAAGAACAGA Num.seqs=7  
 Similarity=0.915344 12  
 CAGAAGAAAG--TAGAAGAA-  
 Rev.of\_GCF\_001645555.1\_ASM164555v1\_genomic.fna\_49:95444-95588  
 Satlength=145 Nr of Repeats=8 RepeatLength=18 seed=TCTTCTACTT Num.seqs=6  
 Similarity=0.950617 17  
 CAGAAGAAAG--TAGAAGAA-  
 GCF\_000007825.1\_ASM782v1\_genomic.fna\_1:2224259-2224349 Satlength=91 Nr of  
 Repeats=4 RepeatLength=18 seed=CAAGAAGAAC Num.seqs=3 Similarity=0.728395  
 9 CTNAAGAAAC--AAGAAGAA-  
 Rev.of\_GCF\_000775975.1\_ASM77597v1\_genomic.fna\_1:2528886-2528958  
 Satlength=73 Nr of Repeats=4 RepeatLength=18 seed=TCTTGTTTCT Num.seqs=4  
 Similarity=0.814815 14  
 CAAAAGAAAC--AAGAAGAG-

Rev.of\_GCF\_001645555.1\_ASM164555v1\_genomic.fna\_12:477954-478062  
 Satlength=109 Nr of Repeats=5 RepeatLength=18 seed=TTGTTTCTTT Num.seqs=4  
 Similarity=0.864198 30  
 GAAAAGAAAC--AAGAAGAG-  
 GCF\_000008505.1\_ASM850v1\_genomic.fna\_1:1260925-1260997 Satlength=73 Nr of  
 Repeats=4 RepeatLength=18 seed=CAAGCGGAAG Num.seqs=4 Similarity=0.901235  
 6 CAGAAACAAG--CGGAAGAA-  
 Rev.of\_GCF\_001591665.1\_ASM159166v1\_genomic.fna\_10:16518-16623  
 Satlength=106 Nr of Repeats=5 RepeatLength=21 seed=TCTTTCTTAT Num.seqs=3  
 Similarity=0.746032 11  
 NATAAGAAAGACAAGAAGAAAN

\*\* \*\* \*\*\*\*\*

Consensus:

cAnAAGAAAGnAGAAGAA

>Bacillus\_Fam\_51\_21\_9 Nr. of seq. 9 Alignment length(with gaps) = 21  
 Alignment score = 0.772046  
 GCF\_001273755.1\_ASM127375v1\_genomic.fna\_17:3615490-3615885 Satlength=396  
 Nr of Repeats=19 RepeatLength=21 seed=ACTCGTGAGT Num.seqs=15  
 Similarity=0.766667 27  
 ACNNTTACTCGTGAGTTTCAG  
 GCF\_001273755.1\_ASM127375v1\_genomic.fna\_17:3619849-3620172 Satlength=324  
 Nr of Repeats=15 RepeatLength=21 seed=TTTACTCGTG Num.seqs=11  
 Similarity=0.831457 45  
 CCTTTTACTCGTGAGTTTCAN  
 GCF\_001273755.1\_ASM127375v1\_genomic.fna\_17:4533871-4534039 Satlength=169  
 Nr of Repeats=8 RepeatLength=21 seed=TTTACTCGTG Num.seqs=8  
 Similarity=0.759637 45  
 TCATTTACTCGTGAGTTTCAC  
 GCF\_001578185.1\_ASM157818v1\_genomic.fna\_1:4693833-4694085 Satlength=253  
 Nr of Repeats=12 RepeatLength=21 seed=TTTACTCGTG Num.seqs=12  
 Similarity=0.904762 45  
 CCATTTACTCGTGAGTTTCGG  
 Rev.of\_GCF\_001273755.1\_ASM127375v1\_genomic.fna\_17:4054385-4054658  
 Satlength=274 Nr of Repeats=13 RepeatLength=21 seed=TCACGAGTAA  
 Num.seqs=13 Similarity=0.759870  
 35 ACTTTTACTCGTGAGTTTGGC  
 GCF\_001578185.1\_ASM157818v1\_genomic.fna\_1:4048935-4049535 Satlength=601  
 Nr of Repeats=25 RepeatLength=21 seed=TTTACTCGTG Num.seqs=20  
 Similarity=0.749482 45  
 ACGTTTACTCGTGAGTTTCGC  
 GCF\_001578185.1\_ASM157818v1\_genomic.fna\_1:4644456-4644561 Satlength=106  
 Nr of Repeats=5 RepeatLength=21 seed=TTTACTCGTG Num.seqs=5  
 Similarity=0.873016 45  
 GCTTTTACTCGTGAGTTTTCG  
 GCF\_001578185.1\_ASM157818v1\_genomic.fna\_1:5224710-5224918 Satlength=209  
 Nr of Repeats=9 RepeatLength=21 seed=TTTACTCGTG Num.seqs=8  
 Similarity=0.709627 45  
 GCTTTTACTCGTGAATTTTCGC  
 GCF\_001578185.1\_ASM157818v1\_genomic.fna\_1:3591601-3592013 Satlength=413  
 Nr of Repeats=12 RepeatLength=21 seed=TTTACTCGTG Num.seqs=10

Similarity=0.673302  
ACNTTTACTCGTGAATTTTGC

45

\*\*\*\*\* \*\*\* \* \*\*  
Consensus:

ACTCGTGAgTTTcgcnCnTTT

>Bacillus\_Fam\_52\_18\_9 Nr. of seq. 9 Alignment length(with gaps) = 18  
Alignment score = 0.911008  
GCF\_000007825.1\_ASM782v1\_genomic.fna\_1:797166-797535 Satlength=370 Nr of  
Repeats=18 RepeatLength=18 seed=GAGCTTTAGC Num.seqs=16  
Similarity=0.733951  
0 GAGCTTTAGCTGCTTCTT  
GCF\_000007845.1\_ASM784v1\_genomic.fna\_1:811902-812082 Satlength=181 Nr of  
Repeats=10 RepeatLength=18 seed=GAGCTTTAGC Num.seqs=10  
Similarity=0.759671  
0 GAGCTTTAGCTGCTTCTT  
GCF\_000008505.1\_ASM850v1\_genomic.fna\_1:810171-810495 Satlength=325 Nr of  
Repeats=18 RepeatLength=18 seed=GAGCTTTAGC Num.seqs=16  
Similarity=0.764198  
0 GAGCTTTAGCTGCTTCTT  
GCF\_000290995.1\_Baci\_cere\_AND1407\_G13175\_V1\_genomic.fna\_9:66816-67098  
Satlength=283 Nr of Repeats=15 RepeatLength=18 seed=GAGCTTTAGC  
Num.seqs=14 Similarity=0.766382 0  
GAGCTTTAGCTGCTTCTT  
Rev.of\_GCF\_000775975.1\_ASM77597v1\_genomic.fna\_1:3984486-3984747  
Satlength=262 Nr of Repeats=14 RepeatLength=18 seed=GCTAAAGCTC  
Num.seqs=13 Similarity=0.771130  
10 GAGCTTTAGCTGCTTCTT  
GCF\_001645555.1\_ASM164555v1\_genomic.fna\_48:62690-62960 Satlength=271 Nr  
of Repeats=13 RepeatLength=18 seed=GAGCTTTAGC Num.seqs=8  
Similarity=0.788360  
0 GAGCTTTAGCTGCTTCTT  
GCF\_000496285.1\_ASM49628v1\_genomic.fna\_1:3419837-3420107 Satlength=271 Nr  
of Repeats=13 RepeatLength=18 seed=GAGCTTTAGC Num.seqs=11  
Similarity=0.714478 0  
GAGCTTTAGCTGCTTCNT  
Rev.of\_GCF\_000832605.1\_ASM83260v1\_genomic.fna\_1:4931692-4932007  
Satlength=316 Nr of Repeats=17 RepeatLength=18 seed=GCTAAAGCTC  
Num.seqs=16 Similarity=0.683626  
10 GAGCTTTAGCTGCTTCNC  
GCF\_000299035.1\_ASM29903v1\_genomic.fna\_2:1062701-1063439 Satlength=739 Nr  
of Repeats=41 RepeatLength=18 seed=CTTCTTGCGC Num.seqs=41  
Similarity=0.916474 12  
GCGCTTTCGCTACTTCTT

\* \*\*\*\*\* \*\*\* \*\*\*\*\*  
Consensus:

GAGCTTTAGCTGCTTctT

>Bacillus\_Fam\_53\_18\_9 Nr. of seq. 9 Alignment length(with gaps) = 18  
Alignment score = 0.913580

GCF\_000007825.1\_ASM782v1\_genomic.fna\_1:4490484-4491069 Satlength=586 Nr of Repeats=9 RepeatLength=18 seed=CCTTGGTTGT Num.seqs=6  
 Similarity=0.930864  
 0 CCTTGGTTGTGTTTCCA  
 Rev.of\_GCF\_000290995.1\_Baci\_cere\_AND1407\_G13175\_V1\_genomic.fna\_2:317567-318278 Satlength=712 Nr of Repeats=13 RepeatLength=18 seed=ACAACCAAGG  
 Num.seqs=11 Similarity=0.849158 10  
 CCTTGGTTGTCGTTTCCA  
 Rev.of\_GCF\_001645555.1\_ASM164555v1\_genomic.fna\_1:82827-83484  
 Satlength=658 Nr of Repeats=14 RepeatLength=18 seed=ACAACCAAGG  
 Num.seqs=13 Similarity=0.827160  
 10 CCTTGGTTGTCGTTTCCA  
 GCF\_000712615.1\_ASM71261v1\_genomic.fna\_1:773424-773550 Satlength=127 Nr of Repeats=7 RepeatLength=18 seed=TTGTCTCCAC Num.seqs=7  
 Similarity=0.844797  
 9 CCTTGGTTGTGTCTCCA  
 GCF\_000008505.1\_ASM850v1\_genomic.fna\_1:4343825-4344464 Satlength=640 Nr of Repeats=9 RepeatLength=18 seed=CCTTGGTTGT Num.seqs=7  
 Similarity=0.823633  
 0 CCTTGGTTGTCGTTTCCG  
 GCF\_000496285.1\_ASM49628v1\_genomic.fna\_1:1747374-1748121 Satlength=748 Nr of Repeats=18 RepeatLength=18 seed=TTTCCGCCTT Num.seqs=17  
 Similarity=0.909586 12  
 CCTTGGTTGTCGTTTCCG  
 Rev.of\_GCF\_000775975.1\_ASM77597v1\_genomic.fna\_1:319755-320394  
 Satlength=640 Nr of Repeats=13 RepeatLength=18 seed=ACAACCAAGG  
 Num.seqs=12 Similarity=0.849607  
 10 CCTTGGTTGTCGTTTCCG  
 GCF\_000831065.1\_ASM83106v1\_genomic.fna\_1:4247332-4247404 Satlength=73 Nr of Repeats=4 RepeatLength=18 seed=CCTTGGTTGT Num.seqs=4  
 Similarity=0.962963  
 0 CCTTGGTTGTCGTTTCCG  
 Rev.of\_GCF\_000832605.1\_ASM83260v1\_genomic.fna\_1:1427286-1427889  
 Satlength=604 Nr of Repeats=11 RepeatLength=18 seed=ACAACCAAGG  
 Num.seqs=10 Similarity=0.889712  
 10 CCTTGGTTGTCGTTTCCG

\*\*\*\*\* \*\* \*\*

Consensus:

CCTTGGTTGTcGTTTCCg

>Bacillus\_Fam\_54\_114\_8 Nr. of seq. 8 Alignment length(with gaps) = 115  
 Alignment score = 0.790890  
 GCF\_000242895.2\_ASM24289v3\_genomic.fna\_1:2821534-2822245 Satlength=712 Nr of Repeats=5 RepeatLength=114 seed=CCGCTTACAT Num.seqs=4  
 Similarity=0.752437 0  
 CCGCTTACATCGCATTGGCCATACTTATTATAACCCACAGCCGCCACCGTGCCGTCAGATTTAAGGCCGACGG  
 TATGANTGC-AACCCGCCGCTACCGCCACAATACACGCCAG  
 GCF\_001278705.1\_ASM127870v1\_genomic.fna\_1:2862067-2862637 Satlength=571  
 Nr of Repeats=4 RepeatLength=114 seed=CGCGCCAGTC Num.seqs=3  
 Similarity=0.641762 106  
 TCGCTTACATCGCATTGACCATACTCATTNTCAACCCACAGCAACCACCGTNCCATCAGATTTAAGGCCGATGG  
 TATGANNAC-AACCCGCCGCAACCGCCACAATACCGCGCCAG

Rev.of\_GCF\_000759675.1\_ASM75967v1\_genomic.fna\_152:2346-2916 Satlength=571  
Nr of Repeats=4 RepeatLength=114 seed=CTTAAATCGG Num.seqs=3  
Similarity=0.610136 65

TCGTTTACATTGCATTGGCCATNCTTATTNCNACCCACAGCTGCCACCGTACCGTCCGATTTAAGCCCAATGG  
TATGACANT-AACCCGCCGCAACCGCCACAATATCGCGCCAG

Rev.of\_GCF\_001591625.1\_ASM159162v1\_genomic.fna\_135:4361-5072  
Satlength=712 Nr of Repeats=6 RepeatLength=114 seed=GGGCTTAAAT  
Num.segs=5 Similarity=0.608832

68  
TCGCTTACATTGCATTGGCCATACTTATTNCNACCCACAGCCACCACCGTACCGTCCGATTTTAAGNCCAATNG  
TATGNAGNC - AACCCGCCGCNACCGCCACAATATCGTGCCAG

Rev.of\_GCF\_001591665.1\_ASM159166v1\_genomic.fna\_6:40523-41234  
Satlength=712 Nr of Repeats=6 RepeatLength=114 seed=CTTAAATCGG  
Num.segs=5 Similarity=0.636182

TCGCTTACATTGCATTGGCCATNCTTATTCCANCCACAGCCATCACCGTTCCGTCCGATTTAAGNCCGATGG  
TATGANNNC-AACCCGCCGCNACCGCCACAATATCGCGCCAG

Rev.of\_GCF\_001591805.1\_ASM159180v1\_genomic.fna\_74:3413-4124 Satlength=712  
Nr.of.Repeats=6 RepeatLength=114 seed=GGGCTTAAAT Num.seqs=5  
Similarity=0.632749 68

TCGCTTACATTCGATTGGCCATNCTTATTNNNACCCACAGCNGCCACNGTACCGTCCGATTTAAGNCCGATNG  
TATGNNNAC-AACCCGCCGCAACCGCCACAATATCGNNCCAG

GCF\_000307875.1\_BABA1.0\_genomic.fna\_35:121244-121841 Satlength=598 Nr of Repeats=4 RepeatLength=114 seed=CGCCACAATA Num.seqs=3 Similarity=0.648309

96  
TCATTACATTGCATTGGCCATACTNATTCAACCTACAGCCATCACNGTACCGTCCGATTTAAGNCCGATNG  
TATGANNANTAGCCCCGCCGCTATCGCCACAATATCGCGCCAG

GCF\_000504145.1\_SOAPdenovo\_for\_version2.04\_of\_Bacillus\_sp.\_FJAT-14515\_genome\_genomic.fna\_1:606481-607078 Satlength=598 Nr\_of Repeats=4 RepeatLength=114 seed=CGCCACAATA Num.seqs=3 Similarity=0.686957 96 TCGCTTACATTGCATTGGCGATACTNATTCAACCCACAGCCGACACTGTACCGTCCGATTTAAGACCGATGG TATGANNANTCNCCAGCCGCGATCGCCACAATATCGCGCCAG

\*        \* \* \* \* \*   \* \* \* \* \*   \*   \* \*   \* \*   \* \* \*        \* \*   \* \* \* \* \*        \* \* \*   \* \*   \* \*   \* \*   \* \* \* \* \* \* \* \*   \* \*   \*  
 \* \* \* \* \*                \* \*   \* \* \* \* \*   \*   \* \* \* \* \* \* \* \* \* \*   \*        \* \* \* \* \*

Consensus:

TCGCTTACATtGCATTGGCCATaCTtATTnnaACCCACAGCcacCACcGTaCCGTcGATTTAAGnCCgATgG  
TATGannacAaCCCGCCGcNacCGCCACAATAtCGcGCCAG

>Bacillus\_Fam\_55\_52\_8 Nr. of seq. 8 Alignment length(with gaps) = 59  
Alignment score = 0.632062

GCF\_000311725.1\_ASM31172v1\_genomic.fna\_4:214050-214934 Satlength=885 Nr  
of Repeats=17 RepeatLength=52 seed=TCATGAGGAC Num.seqs=13  
Similarity=0.774714

TCATGAGGACA-AAGTC-GGGC-GAAA-ATCAGGAAAGTTTGTCTCAT--AGAGG-GT

Rev.of\_GCF\_000311725.1\_ASM31172v1\_genomic.fna\_4:573981-574346  
Satlength=366 Nr of Repeats=7 RepeatLength=52 seed=ACTTTGTCCT Num.seqs=6  
Similarity=0.777778 15

TCATGAGGACA-AAGTC-GGAC-GAAA-ACCAGGAAAGTTTGTCTCAT--AGAGG-GT

Rev\_of\_GCF\_000311725.1\_ASM31172v1\_genomic.fna\_4:290049-290519  
Satlength=471 Nr of Repeats=9 RepeatLength=52 seed=TATGAGGACA Num.seqs=7

Similarity=0.867026 46  
 TCATGAGGACA-AAGTC-GAAC-GAAA-AGGAAGAAAGTTTGTCTCAT--AGAGN-GT  
 GCF\_000311725.1\_ASM31172v1\_genomic.fna\_11:254-826 Satlength=573 Nr of  
 Repeats=11 RepeatLength=52 seed=GTTCATGAGG Num.seqs=11  
 Similarity=0.792453  
 50 TCATGAGGACA-AAGTC-GAAC-GAAA-TCCAAGAAAGANTGTCTCAT--AGAGG-GT  
 Rev.of\_GCF\_000311725.1\_ASM31172v1\_genomic.fna\_12:53034-53294  
 Satlength=261 Nr of Repeats=5 RepeatLength=52 seed=GACTTTGTCC Num.seqs=5  
 Similarity=0.763030 16  
 TCATGAGGACA-AAGTC-AGAC-GAAA-ATCAAGAAAGTTTGTCTCAT--A-AGGNGT  
 Rev.of\_GCF\_000311725.1\_ASM31172v1\_genomic.fna\_4:326412-326730  
 Satlength=319 Nr of Repeats=6 RepeatLength=53 seed=TGTGGACAAA Num.seqs=6  
 Similarity=0.906080 44 -  
 CATGAGGACA-AACTCTGGAA-GAAA-AGCGGTGAAGTTTGTCCACATA-AGAGG-TT  
 GCF\_001591665.1\_ASM159166v1\_genomic.fna\_17:30304-30511 Satlength=208 Nr  
 of Repeats=4 RepeatLength=52 seed=GGGCTCATGA Num.seqs=3  
 Similarity=0.897436  
 48 TCATGAGGACAGAAAT--GGCGAGAAA-ACCAAGAAA-ATTGTCTCAT-GA-AGG-GC  
 GCF\_001636315.1\_ASM163631v1\_genomic.fna\_1:3657440-3657908 Satlength=469  
 Nr of Repeats=9 RepeatLength=52 seed=ATGAGGACAA Num.seqs=9  
 Similarity=0.884615 54  
 TCATGAGGACA-AAATC-GGAG-GAAACCCCCAGGAA-TCTGTCTCAT-GA-AAG-GC

\*\*\*\*\* \*\* \* \*\*\*\* \*\* \*\*\*\*\* \*\* \* \*  
 Consensus:

TCATGAGGACAAAgTCGgacGAAAacCaaGaAAgttTGTCTCATAgAGGGt

>Bacillus\_Fam\_56\_52\_8 Nr. of seq. 8 Alignment length(with gaps) = 58  
 Alignment score = 0.632389  
 GCF\_000621445.1\_ASM62144v1\_genomic.fna\_1:29213-29577 Satlength=365 Nr of  
 Repeats=7 RepeatLength=52 seed=GAGTTTTGTC Num.seqs=7 Similarity=0.892183  
 117 T-CTC--TTTTC-CCTCGAGTTT-TGTCCTTCATCTCTCTTATGAAGGACACTTC-TC  
 GCF\_000621445.1\_ASM62144v1\_genomic.fna\_4:243825-244085 Satlength=261 Nr  
 of Repeats=5 RepeatLength=52 seed=GGACACTTCT Num.seqs=5  
 Similarity=0.837736  
 145 T-CNC--TTTTT-CTTC-TCTTTCTGTCCTTCATCGCTCTTATGAAGGACACTTC-TC  
 Rev.of\_GCF\_000621445.1\_ASM62144v1\_genomic.fna\_17:35462-35826  
 Satlength=365 Nr of Repeats=7 RepeatLength=52 seed=GATGAAGGAC Num.seqs=7  
 Similarity=0.907204 134  
 A-CTC--TTTCC-TCTCCTCTTT-TGTCCTTCATCAAGCTTATGAAGGACACTTC-TC  
 Rev.of\_GCF\_000621445.1\_ASM62144v1\_genomic.fna\_2:192691-193107  
 Satlength=417 Nr of Repeats=8 RepeatLength=52 seed=TGTCCTTCAT Num.seqs=8  
 Similarity=0.905678 150  
 TGCT---TTTTC-AC-CTAGTTT-TGTCCTTCATCACCTTATGAAGGACACTTCTTT  
 GCF\_000621445.1\_ASM62144v1\_genomic.fna\_3:29111-29423 Satlength=313 Nr of  
 Repeats=7 RepeatLength=52 seed=GTTTTGTCTT Num.seqs=5 Similarity=0.941026  
 171 T-CTA--TTTTC-AC-CTCGTTT-TGTCCTTCATCAACCTTATGAAGGACACTTCCTC  
 GCF\_000621445.1\_ASM62144v1\_genomic.fna\_22:34839-35099 Satlength=261 Nr of  
 Repeats=5 RepeatLength=52 seed=TGTCCTTCAT Num.seqs=5 Similarity=0.815385  
 122 --CTC-ATTTTCCACTC-CATTT-TGTCCTTCATCNGCCTTATGAAGGACACTTC-TC  
 GCF\_001591805.1\_ASM159180v1\_genomic.fna\_52:18377-18636 Satlength=260 Nr  
 of Repeats=5 RepeatLength=52 seed=TGTCTTCAT Num.seqs=4

Similarity=0.841880

122 --CTCGATTTCCAAGT-AGTTT-TGTCCTTCATCAGCTTTATGAAGGACACTTC--C  
GCF\_000621445.1\_ASM62144v1\_genomic.fna\_12:17218-17686 Satlength=469 Nr of  
Repeats=9 RepeatLength=52 seed=TGTCCTTCAT Num.seqs=9 Similarity=0.821803  
122 A-CCG-TTTTTC-GCTC-ACTTT-TGTCCTTCATCAGCTTATGAAGGACACTTT-AC

\*\*\* \*\*\*\*\* \* \*\*\*

Consensus:

nagTTTGTCTTCATCaccCTTATGAAGGACACTTCTCtCtCtCtTTtCaCtC

>Bacillus\_Fam\_57\_52\_8 Nr. of seq. 8 Alignment length(with gaps) = 57

Alignment score = 0.671261

GCF\_000751775.1\_A1A\_genomic.fna\_13:16-692 Satlength=677 Nr of Repeats=13

RepeatLength=52 seed=GGACAAAATG Num.seqs=13 Similarity=0.818930

0 GGACAAAA--TGGAGNC-TCAATCAGGAAA--AACTGTCCAATAGAACGGTTCTCAT

Rev.of\_GCF\_000751775.1\_A1A\_genomic.fna\_98:24731-25094 Satlength=364 Nr of

Repeats=7 RepeatLength=52 seed=CTATTGGACA Num.seqs=6 Similarity=0.760684

40 GGACAAAA--TGGGGG-TCAATCAGGAAA--AACTGTCCAATAGAACGGCTCTCGT

Rev.of\_GCF\_000751775.1\_A1A\_genomic.fna\_98:28702-29324 Satlength=623 Nr of

Repeats=12 RepeatLength=52 seed=TCTATTGGAC Num.seqs=8

Similarity=0.787062

41 GGACAAAA--TGAGGAG-TCAATCAGGAAA--AACTGTCCAATAGAACGGTTCTCGT

GCF\_000751775.1\_A1A\_genomic.fna\_94:14879-15191 Satlength=313 Nr of

Repeats=6 RepeatLength=52 seed=TCCAATAGAA Num.seqs=6 Similarity=0.834188

32 GGACAAAA--TGGAGCC-TCAACCAGGTGA--AACTGTCCAATAGAACGACTCTCGT

GCF\_000751775.1\_A1A\_genomic.fna\_93:1659-2387 Satlength=729 Nr of

Repeats=14 RepeatLength=52 seed=TGTCCTTCAT Num.seqs=14

Similarity=0.827631

30 GGACAAAA--TGAGGAG-GCAATCTGCAAA--AAATGTCCAATAGAACGGCTCTCAT

Rev.of\_GCF\_000751775.1\_A1A\_genomic.fna\_100:11954-12735 Satlength=782 Nr

of Repeats=15 RepeatLength=52 seed=TTGTCCATGA Num.seqs=14

Similarity=0.800055

58

GGACAAAA--AAGNGTCCAATCAGNAAA--AATTGTCCAATAGAACGGCTTTCAT

Rev.of\_GCF\_000751775.1\_A1A\_genomic.fna\_81:7055-7471 Satlength=417 Nr of

Repeats=8 RepeatLength=52 seed=TTTTGTCCAT Num.seqs=8 Similarity=0.750433

8 GGACAAAACCTGAAG--TCAACCAGCAAA--AACTGTCCAATAGAACGGCTCTAAT

GCF\_000751775.1\_A1A\_genomic.fna\_12:34323-34582 Satlength=260 Nr of

Repeats=5 RepeatLength=52 seed=AACTGTCCAA Num.seqs=4 Similarity=0.528283

28 GGACAAAA--TTGAG-N-TAAAAAAGAAAGGAACGTCCAAGAGAACGGTTCTCAT

\*\*\*\*\* \* \*\* \* \*\* \*\*\*\*\* \*\*\* \*\* \* \* \*

Consensus:

GGACAAAATgaaGngtCAAtCAGgAAAAAcTGTCCAATAGAACGGcTCTCaT

>Bacillus\_Fam\_58\_52\_8 Nr. of seq. 8 Alignment length(with gaps) = 57

Alignment score = 0.619779

GCF\_000813125.1\_ASM81312v1\_genomic.fna\_49:14856-15064 Satlength=209 Nr of

Repeats=4 RepeatLength=52 seed=TTTCTTGACA Num.seqs=4 Similarity=0.884615

2 G-TTTTCTTGACAAC-TTGGCGCTCT-GA-AC-CCTGAAACCTGTCACAATAACGGC

GCF\_000813125.1\_ASM81312v1\_genomic.fna\_50:13-221 Satlength=209 Nr of

Repeats=4 RepeatLength=52 seed=AAACCTGTCA Num.seqs=4 Similarity=0.777778

32 T-TTTTCTTGACAGC-TTGGGCTCC-AC-TA-CCTGAAACCTGTCACAATAACGGC

Rev.of\_GCF\_000813125.1\_ASM81312v1\_genomic.fna\_136:11-271 Satlength=261 Nr  
of Repeats=5 RepeatLength=52 seed=CTGTCAAGAA Num.seqs=5  
Similarity=0.761538 65  
T-TTTTCTTGACAGC-TTTGGGCTCC-GC-AG-CCTGAAACCTGTCACAATAACTGC  
Rev.of\_GCF\_001315165.1\_ASM131516v1\_genomic.fna\_42:3-211 Satlength=209 Nr  
of Repeats=4 RepeatLength=52 seed=GTTATTGTGA Num.seqs=4  
Similarity=0.863248  
49 T-TTTTCTTGACAGC-TTTGGGCTAT-GT-AC-CTTGAAAGCTGTCACAATAACTAC  
Rev.of\_GCF\_000813125.1\_ASM81312v1\_genomic.fna\_100:44990-45353  
Satlength=364 Nr of Repeats=7 RepeatLength=52 seed=GTTATTGTGA Num.seqs=6  
Similarity=0.841026 49  
T-TTTTCTTGACAGC-TTTTCCGTGT-TC-GC-CCCCAAACCTGTCACAATAACGGC  
Rev.of\_GCF\_000813125.1\_ASM81312v1\_genomic.fna\_60:30-342 Satlength=313 Nr  
of Repeats=5 RepeatLength=52 seed=AAAGCTGTCA Num.seqs=4  
Similarity=0.764403  
69 T-CTTTCTTGACAGC-TTTTCGCTCTATC-NCACCCAAACCTGTCACAATAACGAC  
Rev.of\_GCF\_001315165.1\_ASM131516v1\_genomic.fna\_89:4898-5417 Satlength=520  
Nr of Repeats=9 RepeatLength=52 seed=GAAAAGCTGT Num.seqs=6  
Similarity=0.771279 71  
T-TTTTCTTGACAGC-TTTTC-CTCA-TCAGC-ATCCAAACCTGTCACGATTACCTC  
Rev.of\_GCF\_000934845.1\_ASM93484v1\_genomic.fna\_1:28106-28314 Satlength=209  
Nr of Repeats=4 RepeatLength=52 seed=TTATTTTGAC Num.seqs=4  
Similarity=0.881027 47  
TCT-TTCTTGACAACCTTTTGCCCTTT-TC-AC--CTGAAAGTTGTCAAATAACCTC

\*\*\*\*\* \* \*\*\* \* \*\*\* \*\*\*\*\* \*\* \*\* \*  
Consensus:

TTTCTTGACAgCTTTgCGTctttaccctgAAAcCTGTCACAATAACgGCTT

>Bacillus\_Fam\_59\_55\_8 Nr. of seq. 8 Alignment length(with gaps) = 57  
Alignment score = 0.625731  
GCF\_000708755.2\_ASM70875v2\_genomic.fna\_6:281885-282097 Satlength=213 Nr  
of Repeats=4 RepeatLength=53 seed=CGCCACAAAC Num.seqs=4  
Similarity=0.890985  
13 CTAC-GG-GGAATGACGCCACAAAC-ATGGATGCTTTCACATG-AAAAGTGGCAGCA  
GCF\_000709935.2\_ASM70993v2\_genomic.fna\_15:188408-188619 Satlength=212 Nr  
of Repeats=4 RepeatLength=53 seed=CGCCACAAAC Num.seqs=3  
Similarity=0.899371  
13 CTAC-GG-GGAATGACGCCACAAAC-ATGGATGCTTTCACATG-AAAAGTGGCGGCA  
Rev.of\_GCF\_000708755.2\_ASM70875v2\_genomic.fna\_22:121820-122085  
Satlength=266 Nr of Repeats=5 RepeatLength=53 seed=TGGCGTCATT Num.seqs=5  
Similarity=0.899371 18  
CTTC-GC-GGAATGACGCCACAAAC-A-AGAACCCTTCTCCGGCAAAAGTGGCAGCA  
Rev.of\_GCF\_000709935.2\_ASM70993v2\_genomic.fna\_24:232406-232777  
Satlength=372 Nr of Repeats=7 RepeatLength=53 seed=TGGCGTCATT Num.seqs=7  
Similarity=0.901767 18  
CTAC-GC-GGAATGACGCCACAAAC-N-AGAACCCTTCTCTGGCAAAAGTGGCAGCA  
Rev.of\_GCF\_000709935.2\_ASM70993v2\_genomic.fna\_1:491832-492044  
Satlength=213 Nr of Repeats=4 RepeatLength=53 seed=ATCCTAGTTT Num.seqs=4  
Similarity=0.809671 29  
CTACAGC--GAATGACGCCACAACTA-GGATCC-AACTACGATAAAAGTGGCACCA  
GCF\_000709935.2\_ASM70993v2\_genomic.fna\_5:571905-572276 Satlength=372 Nr  
of Repeats=7 RepeatLength=53 seed=ACGAATGACG Num.seqs=7



Similarity=0.841869

58 CTACAAC--GAATGACGCCACTAACCA-TCATCC-ATCTCTGGTAAAAGTGGCGGCA  
Rev.of\_GCF\_000709935.2\_ASM70993v2\_genomic.fna\_4:195544-195756  
Satlength=213 Nr of Repeats=4 RepeatLength=53 seed=CCACTTTTTTC Num.seqs=4  
Similarity=0.895178 48  
CTA-AGCT-GAATGACGCCACAAATGA-GGATCC-ATCACTGGAAAAAGTGGCGTCA  
GCF\_000709935.2\_ASM70993v2\_genomic.fna\_15:32457-32775 Satlength=319 Nr of  
Repeats=5 RepeatLength=53 seed=CACTACCGCG Num.seqs=4 Similarity=0.756813  
51 CTACCGC--GAATGACGCCACAAATGA-GCATTC-ATCAAAGGCAAAAGTGGCGCCA

\*\*\*\*\* \* \* \* \*\*\*\*\* \*

Consensus:

CGCCACAAAcnAggAtcCnaTCacngGnAAAAGTGGCagCACTACnGcgGAATGA

>Bacillus\_Fam\_60\_52\_8 Nr. of seq. 8 Alignment length(with gaps) = 56  
Alignment score = 0.673044  
GCF\_000708755.2\_ASM70875v2\_genomic.fna\_1:172527-172891 Satlength=365 Nr  
of Repeats=7 RepeatLength=52 seed=ATGGCACTTA Num.seqs=7  
Similarity=0.787546  
0 ATGGCACTTATCCGGNAGAATAGAACCCTCAAGCAGAGAAAT-CTC--AGAGTTG  
GCF\_000709935.2\_ASM70993v2\_genomic.fna\_1:173354-173666 Satlength=313 Nr  
of Repeats=6 RepeatLength=52 seed=GCACTTATCC Num.seqs=6  
Similarity=0.810256  
3 ATGGCACTTATCCGGGAGAATAGAACCCTCAAGCAGAGNAAT-CAC--AGAGTTG  
Rev.of\_GCF\_000708755.2\_ASM70875v2\_genomic.fna\_2:379262-379469  
Satlength=208 Nr of Repeats=4 RepeatLength=52 seed=GATAAGTGCC Num.seqs=3  
Similarity=0.783951 12  
AGGGCACTTATCAGGAAGTCTAGAACCATCAAACTGAAGGATTCTC--AG-GTTG  
GCF\_000708755.2\_ASM70875v2\_genomic.fna\_5:265879-266243 Satlength=365 Nr  
of Repeats=7 RepeatLength=52 seed=ACCATCAAAA Num.seqs=7  
Similarity=0.811966  
24 ATGGCACTTATCGGGGAGAACAGTACCATCAAAAGGAAGAATGTTT--TG-GTTG  
GCF\_000709935.2\_ASM70993v2\_genomic.fna\_13:199669-200033 Satlength=365 Nr  
of Repeats=7 RepeatLength=52 seed=ACCATCAAAA Num.seqs=7  
Similarity=0.781441  
24 ATGGCACTTATCNGGGAGAACAGAACCATCAAAAGGAAGAATGTTC--TG-GTTG  
Rev.of\_GCF\_000708755.2\_ASM70875v2\_genomic.fna\_7:77605-78021 Satlength=417  
Nr of Repeats=8 RepeatLength=52 seed=TTTTGATGGT Num.seqs=8  
Similarity=0.850517 34  
ATGGCACTTATCCGGAAGAATAGAACCATCAAAAAGAAGAATCCAC--AG-GTTG  
Rev.of\_GCF\_000709935.2\_ASM70993v2\_genomic.fna\_19:84981-85241  
Satlength=261 Nr of Repeats=5 RepeatLength=52 seed=TTTTGATGGT Num.seqs=5  
Similarity=0.838462 34  
ATGGCACTTATCCGGAAGAATAGAACCATCAAAAAGAAGATNTAC--AG-GTTG  
Rev.of\_GCF\_000709935.2\_ASM70993v2\_genomic.fna\_19:30893-31257  
Satlength=365 Nr of Repeats=7 RepeatLength=52 seed=CCTCTGTTGA Num.seqs=5  
Similarity=0.815385 38  
GTGGTACTTATCAGGGAGAATAGAACCATCAA-CAGAGG-AT-CTCGTTTG-GTTG

\*\* \*\*\*\*\* \*\* \*\* \*\* \* \*\* \*

Consensus:

ATGGCACTTATCcGGgAGAAAtAGAACCAtCAAAAAgAagaATnctCaGGTTG



Similarity=0.790598  
 43 GGTACTAGTCATACGGACTAAACCCCTCTGAACAGAGAAAAA---GAAACAGAG  
 Rev.of\_GCF\_000473245.1\_ASM47324v1\_genomic.fna\_1:2545989-2546197  
 Satlength=209 Nr of Repeats=4 RepeatLength=52 seed=CCCTCTGTTT Num.seqs=4  
 Similarity=0.790598 54  
 GGTACTAGTCATGCGGACTAAGACCCTCTGAACGGTGAAAAA---GAAACAGAG  
 GCF\_000153365.1\_ASM15336v1\_genomic.fna\_72:65371-65750 Satlength=380 Nr of  
 Repeats=5 RepeatLength=52 seed=AAAAAAGAAA Num.seqs=3 Similarity=0.829060  
 88 GGTCTTAGTCAAGGCCACTAAGACCCTCTGACCAG-GAAAAAA-G-AAAACAGAT  
 GCF\_000473245.1\_ASM47324v1\_genomic.fna\_1:1667185-1667564 Satlength=380 Nr  
 of Repeats=5 RepeatLength=52 seed=AAAAAAGAAA Num.seqs=3  
 Similarity=0.829060 88  
 GGTCTTAGTCAAGGCCACTAAGACCCTCTGACCAG-GAAAAAA-G-AAAACAGAT  
 GCF\_000153365.1\_ASM15336v1\_genomic.fna\_16:461270-461740 Satlength=471 Nr  
 of Repeats=9 RepeatLength=52 seed=GGTCTTAGTC Num.seqs=7  
 Similarity=0.854701  
 0 GGTCTTAGTCAGTGCGACTAACACCATCT-AGCCA-CAGAAAA-GCGAATCAGAC  
 Rev.of\_GCF\_000473245.1\_ASM47324v1\_genomic.fna\_1:2350437-2350907  
 Satlength=471 Nr of Repeats=9 RepeatLength=52 seed=CTGACTAAGA Num.seqs=7  
 Similarity=0.854701 12  
 GGTCTTAGTCAGTGCGACTAACACCATCT-AGCCA-CAGAAAA-GCGAATCAGAC

\*\*\* \*\*\*\* \* \*\*\*\* \*\*\* \*\*\* \* \* \*\*\*\* \*\* \*\*\*\*

Consensus:

GGTctTAGTcAagccgACTAanACCtCTgAnccggAaAAAAggAAaCAGAg

>Bacillus\_Fam\_63\_52\_8 Nr. of seq. 8 Alignment length(with gaps) = 54  
 Alignment score = 0.661155  
 GCF\_001278705.1\_ASM127870v1\_genomic.fna\_1:569178-569542 Satlength=365 Nr  
 of Repeats=7 RepeatLength=52 seed=GATGAAGGAC Num.seqs=7  
 Similarity=0.862027  
 0 GATGAAGGACATTTCTTTGGCTATC-TTGCCTCATTTTGTCTTCAGCACCCG-  
 Rev.of\_GCF\_001278705.1\_ASM127870v1\_genomic.fna\_1:2433779-2434247  
 Satlength=469 Nr of Repeats=9 RepeatLength=52 seed=ATGTCCTTCA Num.seqs=9  
 Similarity=0.754274 12  
 AATGAAGGACATTTCTCTGNCTCAC-TTGCCTCATTTTGTCTTCATAACCCG-  
 Rev.of\_GCF\_001278705.1\_ASM127870v1\_genomic.fna\_1:577894-578363  
 Satlength=470 Nr of Repeats=9 RepeatLength=52 seed=GAAGGACAAA Num.seqs=8  
 Similarity=0.786388 44  
 TATGAAGGACTTTTCTCGAGCTCTC-TTACTCTTTTTTGTCTTCCTTCACTACCCG-  
 Rev.of\_GCF\_001278705.1\_ASM127870v1\_genomic.fna\_1:3589135-3589394  
 Satlength=260 Nr of Repeats=5 RepeatLength=52 seed=TGAAGGACAA Num.seqs=4  
 Similarity=0.777778 45  
 GATGAAGGACTTTTCTCTGGCTCTT-TTACGCCTTTTTGTCTTCATGACCCG-  
 Rev.of\_GCF\_001278705.1\_ASM127870v1\_genomic.fna\_1:3837620-3837827  
 Satlength=208 Nr of Repeats=4 RepeatLength=52 seed=GTTCTGAAGG Num.seqs=3  
 Similarity=0.965812 49  
 TATGAAGGACTTTTCCTTGGATTTC-CTGCTCCTTTTTGTCTTCAGAACCCCT-  
 GCF\_001636425.1\_ASM163642v1\_genomic.fna\_1:3113621-3114088 Satlength=468  
 Nr of Repeats=9 RepeatLength=52 seed=TTGTCCTTCA Num.seqs=8  
 Similarity=0.810984 87  
 TATGAAGGACGTTTCCCTGGATTCTCT-CACGGTTTTGTCTTCATCACCCCT-

GCF\_001278705.1\_ASM127870v1\_genomic.fna\_1:1906710-1907023 Satlength=314  
Nr of Repeats=5 RepeatLength=52 seed=TGAAGGACTT Num.seqs=3  
Similarity=0.982906 1  
G-TGAAGGACTTTTCTCTGGATCTA-TTCCCTCTTTTCGTCCTTCAGCTCCCCCT  
GCF\_001278705.1\_ASM127870v1\_genomic.fna\_1:2231666-2231875 Satlength=210  
Nr of Repeats=4 RepeatLength=52 seed=TTTCTCTGG Num.seqs=3  
Similarity=0.897436 9  
GATGATGGACTTTTCTCTGGATCTT-TTCCCTCTTTTGTCTTCAGAACCCC-

\*\*\* \*\*\*\* \* \* \* \* \*  
Consensus:

gATGAAGGACtTTTctcTGGaTcTctTnCncctTTTTGTCCCTTCagnACCCg

>Bacillus\_Fam\_64\_45\_8 Nr. of seq. 8 Alignment length(with gaps) = 45  
Alignment score = 0.881481  
GCF\_000007825.1\_ASM782v1\_genomic.fna\_1:2082917-2083097 Satlength=181 Nr  
of Repeats=4 RepeatLength=45 seed=TTTTTGCTCT Num.seqs=4  
Similarity=0.901235  
0 TTTTTGCTCTTCTTGTTGCTTACGAGCTTGCTCATCAGCTAGACG  
GCF\_000007845.1\_ASM784v1\_genomic.fna\_1:2006658-2006928 Satlength=271 Nr  
of Repeats=6 RepeatLength=45 seed=TCTTGTTGTT Num.seqs=4  
Similarity=0.812500  
7 TTTTTGTTCTTCTTGTTGTTTACGAGCTTGTTTCATCAGCCTGGCG  
GCF\_000290995.1\_Baci\_cere\_AND1407\_G13175\_V1\_genomic.fna\_1:1160788-1161253  
Satlength=466 Nr of Repeats=8 RepeatLength=45 seed=TCTTGTTGTT Num.seqs=5  
Similarity=0.806944 7  
TTTTTGTTCTTCTTGTTGTTTACGAGCTTGTTTCATCAGCCTGGCG  
GCF\_000831065.1\_ASM83106v1\_genomic.fna\_1:1900224-1900491 Satlength=268 Nr  
of Repeats=6 RepeatLength=45 seed=TTACGAGCTT Num.seqs=5  
Similarity=0.988148 19  
TTTTTGCTCTTCTTGTTGTTTACGAGCTTGTTTCATCAGCCTGACG  
Rev.of\_GCF\_000832605.1\_ASM83260v1\_genomic.fna\_1:3728877-3729057  
Satlength=181 Nr of Repeats=4 RepeatLength=45 seed=GCTGATGAAC Num.seqs=4  
Similarity=0.930864 39  
TTTTTGCTCTTCTTGTTGTTTACGAGCCTGTTTCATCAGCTTGCG  
Rev.of\_GCF\_001645555.1\_ASM164555v1\_genomic.fna\_12:642752-643016  
Satlength=265 Nr of Repeats=5 RepeatLength=45 seed=GATGAACAAG Num.seqs=4  
Similarity=0.916049 81  
TTTTTGCTCTTCTTGTTGTTTACGAGCTTGTTTCATCAGCTTGCG  
GCF\_000161455.1\_ASM16145v1\_genomic.fna\_1:1905065-1905245 Satlength=181 Nr  
of Repeats=4 RepeatLength=45 seed=GCTTGACGTT Num.seqs=4  
Similarity=0.911111 37  
TTTTTGCTCTTCTTGTTGTTTTTGTAGCTTGTTCTCAGCTTGACG  
Rev.of\_GCF\_000299035.1\_ASM29903v1\_genomic.fna\_2:20736-20973 Satlength=238  
Nr of Repeats=5 RepeatLength=45 seed=GAACAAGCTC Num.seqs=4  
Similarity=0.837037 78  
TTGTTGCTCTTCCTGTTGTTTACGAGCTTGTTCTTCAGCTTGACG

\*\* \*\*\* \*\*\*\*\* \*\* \*\*\*\*\* \*\* \* \*  
Consensus:

TTTTTGcTCTTCTTGTTGTTTACGAGCTTGTTCaTCAGctTgaCG

>Bacillus\_Fam\_65\_26\_8 Nr. of seq. 8 Alignment length(with gaps) = 26  
Alignment score = 0.630495  
GCF\_000181495.1\_ASM18149v1\_genomic.fna\_175:18883-19008 Satlength=126 Nr of Repeats=5 RepeatLength=25 seed=AACTGAGCCA Num.seqs=5  
Similarity=0.807692  
0 AACTGAGCCAGGCTCAAAAGGTGTG-  
GCF\_000181495.1\_ASM18149v1\_genomic.fna\_181:9837-9962 Satlength=126 Nr of Repeats=5 RepeatLength=25 seed=TCTGAGCCAG Num.seqs=5 Similarity=0.740741  
1 ATCTGAGCCAGGCTCAAAAGG-GTGG  
Rev.of\_GCF\_001877785.1\_PlanoSAMB\_genomic.fna\_96:412299-412474  
Satlength=176 Nr of Repeats=7 RepeatLength=25 seed=TTTGTGCCTG Num.seqs=7  
Similarity=0.910867 18  
ATTTGAGCCAGGCACAAAAGG-GTTG  
GCF\_001877785.1\_PlanoSAMB\_genomic.fna\_106:16546-16696 Satlength=151 Nr of Repeats=6 RepeatLength=25 seed=TTTGAGCCAG Num.seqs=6 Similarity=0.655967  
1 GTTTGAGCCAGGCTCAAAAGGTGTA-  
Rev.of\_GCF\_001877785.1\_PlanoSAMB\_genomic.fna\_96:184758-184883  
Satlength=126 Nr of Repeats=4 RepeatLength=25 seed=GTGCCTGGCT Num.seqs=3  
Similarity=0.964444 15  
ATTTGAGCCAGGCACAAACGCCCTG-  
GCF\_001877785.1\_PlanoSAMB\_genomic.fna\_128:45834-46035 Satlength=202 Nr of Repeats=8 RepeatLength=25 seed=GCCAGGCACA Num.seqs=7 Similarity=0.838217  
31 ATTTGAGCCAGGCACAAACGTGATG-  
Rev.of\_GCF\_001877785.1\_PlanoSAMB\_genomic.fna\_139:90007-90157  
Satlength=151 Nr of Repeats=6 RepeatLength=25 seed=TTTGAGCCTG Num.seqs=6  
Similarity=0.621811 17  
ATC-GAGCCAGGCTCAAAACGCCAC  
Rev.of\_GCF\_001877785.1\_PlanoSAMB\_genomic.fna\_117:70844-70944  
Satlength=101 Nr of Repeats=4 RepeatLength=25 seed=TTTGAGCCTG Num.seqs=4  
Similarity=0.850427 17  
ATCTGAGCCAGGCTCAAACCAGCCGA

\*\*\*\*\* \*

Consensus:

ATcTGAGCCAGGCTCAAAaggngtgn

>Bacillus\_Fam\_66\_21\_8 Nr. of seq. 8 Alignment length(with gaps) = 24  
Alignment score = 0.630208  
GCF\_000508325.1\_BAVI\_1\_genomic.fna\_132:10204-10328 Satlength=125 Nr of Repeats=4 RepeatLength=21 seed=TTCGCAAATA Num.seqs=3 Similarity=0.583333  
0 -TTCGCAAATAANA--CAGGNGAA  
GCF\_001591805.1\_ASM159180v1\_genomic.fna\_27:26552-26636 Satlength=85 Nr of Repeats=4 RepeatLength=21 seed=ATTCGCAAAT Num.seqs=4 Similarity=0.676768  
0 ATTCGCAAATAAAA--CNGGAGAT  
GCF\_000612665.1\_FF4\_genomic.fna\_70:25409-25493 Satlength=85 Nr of Repeats=4 RepeatLength=21 seed=ATTCGCAAAT Num.seqs=4 Similarity=0.563131  
20 -TTCGCAAATAAAA-TC-GACAAA  
GCF\_001591665.1\_ASM159166v1\_genomic.fna\_6:121036-121119 Satlength=84 Nr of Repeats=4 RepeatLength=21 seed=TTCGCAAATA Num.seqs=3  
Similarity=0.545455  
20 -TTCGCAAATAAAACNC-GTCAA-  
Rev.of\_GCF\_001591665.1\_ASM159166v1\_genomic.fna\_57:31859-31943  
Satlength=85 Nr of Repeats=4 RepeatLength=21 seed=TTTATTGCG Num.seqs=4

Similarity=0.635266 33  
 -TTCGCAAATAAAN--CGGATAAA  
 Rev.of\_GCF\_001591665.1\_ASM159166v1\_genomic.fna\_59:63831-63915  
 Satlength=85 Nr of Repeats=4 RepeatLength=21 seed=TTTATTTGCG Num.seqs=4  
 Similarity=0.582071 33  
 -TTCGCAAATAA--CGGATTAA  
 GCF\_001591805.1\_ASM159180v1\_genomic.fna\_21:4565-4670 Satlength=106 Nr of  
 Repeats=5 RepeatLength=21 seed=TCGCAAATAA Num.seqs=5 Similarity=0.709091  
 43 -TTCGCAAATAA--CNGGTANA  
 GCF\_001591805.1\_ASM159180v1\_genomic.fna\_27:83451-83535 Satlength=85 Nr of  
 Repeats=4 RepeatLength=21 seed=TCGCAAATAA Num.seqs=4 Similarity=0.622475  
 63 -TTCGCAAATAA--CAGGNAAA

\*\*\*\*\* \* \*

Consensus:

TTCGCAAATAAAACnGgnaAa

>Bacillus\_Fam\_67\_21\_8 Nr. of seq. 8 Alignment length(with gaps) = 21  
 Alignment score = 0.806689  
 GCF\_000007825.1\_ASM782v1\_genomic.fna\_1:871016-871268 Satlength=253 Nr of  
 Repeats=11 RepeatLength=21 seed=TGAAGGAACA Num.seqs=10  
 Similarity=0.865961  
 0 TGAAGGAACAGGAAAACCAGG  
 GCF\_000007845.1\_ASM784v1\_genomic.fna\_1:880306-880558 Satlength=253 Nr of  
 Repeats=11 RepeatLength=21 seed=AAGAAACAGA Num.seqs=10  
 Similarity=0.957672  
 2 TGAAGAAACAGAAAAGCCAGG  
 GCF\_000290995.1\_Baci\_cere\_AND1407\_G13175\_V1\_genomic.fna\_1:43675-44110  
 Satlength=436 Nr of Repeats=15 RepeatLength=21 seed=AAGAAACAGA  
 Num.seqs=13 Similarity=0.894180 2  
 TGAAGAAACAGAAAAGCCAGG  
 GCF\_000831065.1\_ASM83106v1\_genomic.fna\_1:719782-719908 Satlength=127 Nr  
 of Repeats=6 RepeatLength=21 seed=TGAAGGAACA Num.seqs=6  
 Similarity=0.894180  
 21 TGAAGGAACAGAAAAGCCAGG  
 GCF\_001645555.1\_ASM164555v1\_genomic.fna\_48:126076-126286 Satlength=211 Nr  
 of Repeats=10 RepeatLength=21 seed=GAAGAAACAG Num.seqs=8  
 Similarity=0.861678 22  
 TGAAGAAACAGAAAACCAGG  
 GCF\_001889165.1\_ASM188916v1\_genomic.fna\_1:134977-135082 Satlength=106 Nr  
 of Repeats=4 RepeatLength=21 seed=GGAACAGATA Num.seqs=3  
 Similarity=0.851852  
 4 NGAAGGAACAGATAACCCAGG  
 GCF\_000496285.1\_ASM49628v1\_genomic.fna\_1:3488675-3488864 Satlength=190 Nr  
 of Repeats=9 RepeatLength=21 seed=ACACCAGGTG Num.seqs=9  
 Similarity=0.925926 13  
 TGGAGGAACAGAAACACCAGG  
 Rev.of\_GCF\_000832605.1\_ASM83260v1\_genomic.fna\_1:4861442-4861757  
 Satlength=316 Nr of Repeats=15 RepeatLength=21 seed=CTCCACCTGG  
 Num.seqs=15 Similarity=0.958881  
 26 TGGAGAGACAGAAACACCAGG

\* \*\* \*\*\*\* \* \*\*\*\*\*

Consensus:

TGaAGaAACAGAAaCCAGG

>Bacillus\_Fam\_68\_52\_7 Nr. of seq. 7 Alignment length(with gaps) = 54  
Alignment score = 0.639624  
GCF\_000759675.1\_ASM75967v1\_genomic.fna\_13:145209-145417 Satlength=209 Nr  
of Repeats=4 RepeatLength=52 seed=CGGTCACCTTA Num.seqs=4  
Similarity=0.730084  
0 CGGTCACCTTATAGCCCTTATTAGTGACCACTTTTTTCGAATTCCTT-TGATTA-  
Rev.of\_GCF\_000759675.1\_ASM75967v1\_genomic.fna\_155:58436-59008  
Satlength=573 Nr of Repeats=11 RepeatLength=52 seed=TGGTAACTAA  
Num.seqs=11 Similarity=0.890452  
29 CGGTCACCTTATAGCCTCTATTAGTTACCACTTTTTTCG-ATTTTTTC-TCATTTT  
GCF\_000759675.1\_ASM75967v1\_genomic.fna\_57:134608-134868 Satlength=261 Nr  
of Repeats=5 RepeatLength=52 seed=ATTTCGGTCA Num.seqs=5  
Similarity=0.794969  
48 CGGTCACCTTATAGCCTTCATTAGTGACCACTCTTCT-ATTTTAAACAAGATTT-  
Rev.of\_GCF\_000759675.1\_ASM75967v1\_genomic.fna\_134:29911-30379  
Satlength=469 Nr of Repeats=9 RepeatLength=52 seed=TATGAGTGAC Num.seqs=9  
Similarity=0.912393 64  
CGGTCACCTCATAGCCTTTATGAGTGACCACTTTTTTAA-ATTTAAACAAGATTA-  
GCF\_000759675.1\_ASM75967v1\_genomic.fna\_85:197429-198209 Satlength=781 Nr  
of Repeats=15 RepeatLength=52 seed=AGCCTTCATG Num.seqs=15  
Similarity=0.914530 63  
CGGTCACCTCATAGCCTTCATGAGTGCCCGGTTTTCCA-ATTCTAACAAGATTC-  
GCF\_000759675.1\_ASM75967v1\_genomic.fna\_73:261668-261928 Satlength=261 Nr  
of Repeats=5 RepeatLength=52 seed=ATTTCGGTCA Num.seqs=5  
Similarity=0.583929  
48 CGGTCAACNATAGCACTCATTGATGACCACTTTCTCT-ATTTCAACCANATTT-  
GCF\_000759675.1\_ASM75967v1\_genomic.fna\_153:33935-34143 Satlength=209 Nr  
of Repeats=4 RepeatLength=52 seed=TTGGTTACCA Num.seqs=4  
Similarity=0.816239  
71 CGGTCACTATAGTCCTCATTGGTTACCACTTTCTCT-ATTCCAACCAGATTT-

\*\*\*\*\* \*\*\*\* \*\* \* \*\* \* \* \*\*\* \*\*

Consensus:

CGGTCACtTATAGCCTtTcATtAGTgACCACTTTtTCnATTtnaaCnagATTt

>Bacillus\_Fam\_69\_52\_7 Nr. of seq. 7 Alignment length(with gaps) = 54  
Alignment score = 0.627572  
GCF\_000813125.1\_ASM81312v1\_genomic.fna\_25:23691-23951 Satlength=261 Nr of  
Repeats=5 RepeatLength=52 seed=GGACAACCTTT Num.seqs=5 Similarity=0.928205  
0 GGACAACCTTTTC-GTTCTTTTCCT-CTAAACCTGTCTGAAGTTGCACCTCCTTC  
GCF\_000934845.1\_ASM93484v1\_genomic.fna\_4:21973-22597 Satlength=625 Nr of  
Repeats=12 RepeatLength=52 seed=GTTCCGACTA Num.seqs=10  
Similarity=0.788889  
48 GGACTACTTTTC-G-CCTTTTCCTGCAAAACCTGTCCGAAGTTGGCTCTTGTTTC  
Rev.of\_GCF\_000934845.1\_ASM93484v1\_genomic.fna\_57:39159-39367  
Satlength=209 Nr of Repeats=4 RepeatLength=52 seed=CAACTTCGGA Num.seqs=4  
Similarity=0.770576 94  
GGACTGCTTTTC-G-CTTTTCCGACAAAACCAGTCCGAAGTTGGCTCTAGTTC

Rev.of\_GCF\_000813125.1\_ASM81312v1\_genomic.fna\_64:18546-18857  
 Satlength=312 Nr of Repeats=5 RepeatLength=52 seed=ACAGGTTTGG Num.seqs=4  
 Similarity=0.676440 33  
 TGACAGCTTTTCTG-GCTTTCCT-CCAAACCTGTCTGAAGTTGGGCGATGTTC  
 GCF\_000813125.1\_ASM81312v1\_genomic.fna\_75:60242-60554 Satlength=313 Nr of  
 Repeats=6 RepeatLength=52 seed=GACAGCTTTT Num.seqs=6 Similarity=0.788034  
 1 TGACAGCTTTTC-C-ACTTCTTCCTCCAAACCTGTCCGAACTTGGGGCTACTTC  
 Rev.of\_GCF\_000813125.1\_ASM81312v1\_genomic.fna\_92:118219-118635  
 Satlength=417 Nr of Repeats=8 RepeatLength=52 seed=GGAAAAGCTG Num.seqs=8  
 Similarity=0.619260 13  
 TGACAGCTTTTC-C-TCTTNCCCCGACCAAACCTGTCCGAACTTGGNGCTTCTTT  
 GCF\_000813125.1\_ASM81312v1\_genomic.fna\_133:9463-9775 Satlength=313 Nr of  
 Repeats=5 RepeatLength=52 seed=CTGACAGCTT Num.seqs=4 Similarity=0.690329  
 51 TGACAGCTTTTC-C-TCNGTTCCTCATCAAACCTGTCCGAACTTGCCTCTACTTC

\*\*\* \*\*\*\*\* \* \*\*\*\*\* \*\*\* \*\*\* \*\*\* \*\*  
 Consensus:

tGACagCTTTTCgnCTTtCCnnCcAAACCTGTcGAAgTTGgnnCTncTTC

>Bacillus\_Fam\_70\_52\_7 Nr. of seq. 7 Alignment length(with gaps) = 54  
 Alignment score = 0.638448  
 GCF\_001636345.1\_ASM163634v1\_genomic.fna\_1:931350-932077 Satlength=728 Nr  
 of Repeats=14 RepeatLength=52 seed=AATCTGGAAA Num.seqs=13  
 Similarity=0.791566 0  
 AATCTGGAAAATGGTGTCTGTA-AAAGGGAAGAAACACCCCTCTATAATCCAN-  
 GCF\_001636345.1\_ASM163634v1\_genomic.fna\_1:1522369-1522681 Satlength=313  
 Nr of Repeats=6 RepeatLength=52 seed=CAGTATCTGG Num.seqs=6  
 Similarity=0.885470 49  
 TATCTGGAAAATGGTGTCTGTA-AAAGGAGAGAAACACCCCTCTAAAGTCCAG-  
 Rev.of\_GCF\_001636345.1\_ASM163634v1\_genomic.fna\_1:3881060-3881632  
 Satlength=573 Nr of Repeats=11 RepeatLength=52 seed=GGTGTCTTCTC  
 Num.seqs=11 Similarity=0.874126  
 38 AAAAAGGTAAACAGTGTCTGCGA-AAAGCAGAGAAACACCCCTCTATAATCCAG-  
 Rev.of\_GCF\_001636345.1\_ASM163634v1\_genomic.fna\_1:4336082-4336445  
 Satlength=364 Nr of Repeats=7 RepeatLength=52 seed=GGGGTGTTC Num.seqs=6  
 Similarity=0.835897 40  
 AATCTAGAAAATAGAGTCGCGG-AAAGGGGAGAAACACCCCGTGGAATCCAG-  
 Rev.of\_GCF\_001636345.1\_ASM163634v1\_genomic.fna\_1:3624890-3625255  
 Satlength=366 Nr of Repeats=7 RepeatLength=52 seed=AGGGGTGTTT Num.seqs=6  
 Similarity=0.870085 40  
 AAAAGGGAAAAT-GTGTCTTGATTAAGG-GAGAAACACCCCTCTGAAATCCAGA  
 Rev.of\_GCF\_001636345.1\_ASM163634v1\_genomic.fna\_1:3412758-3413277  
 Satlength=520 Nr of Repeats=10 RepeatLength=52 seed=CTGTTTTCTGA  
 Num.seqs=9 Similarity=0.849715  
 27 -AAATGGTAAATGGTGTCTCGA-AAACAGNGGAAACACCCCACTAAAAACCACT  
 GCF\_001636345.1\_ASM163634v1\_genomic.fna\_1:1414565-1414877 Satlength=313  
 Nr of Repeats=6 RepeatLength=52 seed=TCCAGAAAAA Num.seqs=6  
 Similarity=0.822222 47  
 AAAAAGGAAAATGGTGTCTGCGG-AAACNGATAAACACACCCGTAAAGTCCAG-

\* \* \*\*\* \* \*\*\* \* \*\* \*\*\*\*\* \* \* \* \*\*\*  
 Consensus:



aAaatGGaAAATgGTGTcGcGaAAAggngAGAAACACCCctcTaaAaTCCAG

>Bacillus\_Fam\_71\_52\_7 Nr. of seq. 7 Alignment length(with gaps) = 54  
Alignment score = 0.641387  
GCF\_002019645.1\_ASM201964v1\_genomic.fna\_1:579578-581402 Satlength=1825 Nr  
of Repeats=35 RepeatLength=52 seed=TGCTGAAGT Num.seqs=34  
Similarity=0.899173 0  
TGTCTGAAGTAGC-CTCGNGTTCGGACAGCTTTGA-TTGTTTAGAAGTAAAAGC  
Rev.of\_GCF\_002019645.1\_ASM201964v1\_genomic.fna\_1:2223040-2223404  
Satlength=365 Nr of Repeats=7 RepeatLength=52 seed=GCTACTTCAG Num.seqs=7  
Similarity=0.912088 13  
TGTCTGAAGTAGC-CTCGGGTTCGGACAGCTTTGA-TTGTTTTAAAGCAAAAGC  
Rev.of\_GCF\_002019645.1\_ASM201964v1\_genomic.fna\_1:4753408-4753928  
Satlength=521 Nr of Repeats=10 RepeatLength=52 seed=GCTACTTCAG  
Num.seqs=10 Similarity=0.850142  
13 TGTCTGAAGTAGC-GTTGGGTTCGGACAGGTTTGG-TTGGTTTTAGGCTAAAGC  
Rev.of\_GCF\_002019645.1\_ASM201964v1\_genomic.fna\_1:1988468-1989404  
Satlength=937 Nr of Repeats=18 RepeatLength=52 seed=AAGCTGTCCG  
Num.seqs=18 Similarity=0.815904  
31 TGTCTGAAGTTGC-CTTGGGTTCGGACAGC-TTGAATTCATTTCTTGCTAAAGC  
Rev.of\_GCF\_002019645.1\_ASM201964v1\_genomic.fna\_1:2086406-2086926  
Satlength=521 Nr of Repeats=10 RepeatLength=52 seed=TTAGACAGC  
Num.seqs=10 Similarity=0.776068  
8 TGTCTGAAGTTCC-CTCCACTTCGGACAGCTTTGA-TTCGTTCTGGGCCAAAGC  
GCF\_002019645.1\_ASM201964v1\_genomic.fna\_1:1098526-1099150 Satlength=625  
Nr of Repeats=12 RepeatLength=52 seed=TGTCGAAGT Num.seqs=12  
Similarity=0.860917 0  
TGTCGAAGTTGCTCT-GAGTTCAGACAGGTTTAG-GGGTTTGAAGCAAAAGC  
Rev.of\_GCF\_002019645.1\_ASM201964v1\_genomic.fna\_1:4437435-4438782  
Satlength=1348 Nr of Repeats=26 RepeatLength=52 seed=TACTTCAGAC  
Num.seqs=24 Similarity=0.790994  
11 TGTCTGAAGTAGCTCT-GTGTTCGGACAGCTTTG-TGCTTTACAAGGCAAAGT

\*\*\*\* \* \* \* \* \*  
Consensus:

TGTCTGAAGTaGCCTnGnGTTTCGGACAGcTTTgaTtgtTTnnaaGcnAAAGC

>Bacillus\_Fam\_72\_52\_7 Nr. of seq. 7 Alignment length(with gaps) = 52  
Alignment score = 0.731380  
GCF\_002019645.1\_ASM201964v1\_genomic.fna\_1:2495463-2495723 Satlength=261  
Nr of Repeats=4 RepeatLength=52 seed=CATAGGCCTT Num.seqs=3  
Similarity=0.811966 0  
CATAGGCCTTCTATGATTTAGTTGTCTGAGCGAAAACAAGGAGAAAGTAAAT  
Rev.of\_GCF\_002019645.1\_ASM201964v1\_genomic.fna\_1:4542766-4542973  
Satlength=208 Nr of Repeats=4 RepeatLength=52 seed=CAGGCAACTT Num.seqs=3  
Similarity=0.761006 28  
CATAGGCCTTCTATGATCAAGTTGCCTGGACGAAAACGAGGAGNAAGTAAAC  
GCF\_002019645.1\_ASM201964v1\_genomic.fna\_1:2741337-2741701 Satlength=365  
Nr of Repeats=7 RepeatLength=52 seed=AAGGAGGAAG Num.seqs=7  
Similarity=0.854701 37  
CATACNCCCTCTATGATCCAGTTGCCGAGGCGAAACCAAGGAGGAAGTGAAT

Rev.of\_GCF\_002019645.1\_ASM201964v1\_genomic.fna\_1:3938951-3939315  
 Satlength=365 Nr of Repeats=7 RepeatLength=52 seed=GCCTATGATT Num.seqs=7  
 Similarity=0.866427 59  
 CATAGGCCTTCTATGAGTCAGTTGCCGAAGCGAAAAACAAGGAGGAAGTGAAT  
 Rev.of\_GCF\_002019645.1\_ASM201964v1\_genomic.fna\_1:3790499-3790810  
 Satlength=312 Nr of Repeats=6 RepeatLength=52 seed=TTTCTCCTTG Num.seqs=5  
 Similarity=0.838462 46  
 CATAGGCTCTCTATGATTGAGTTGCTGAGGCAAAAACAAGGAGAAAGTGAAT  
 GCF\_002019645.1\_ASM201964v1\_genomic.fna\_1:5108997-5109209 Satlength=213  
 Nr of Repeats=4 RepeatLength=52 seed=AAGTGAATCA Num.seqs=3  
 Similarity=0.897436 96  
 CATTGGCTCTCTATGATTGAGTTGCTAAAGCGGAAAACAAGGAGAAAGTGAAT  
 GCF\_002019645.1\_ASM201964v1\_genomic.fna\_1:4292665-4292873 Satlength=209  
 Nr of Repeats=4 RepeatLength=52 seed=AGGAACTCAA Num.seqs=4  
 Similarity=0.910256 41  
 CATAGACCTGCTTTGATCCAGTTGCAGAAGCAAAAACAAGGAGAACTCAAT

\*\*\* \* \*\* \*\*\* \*\*\*\*\* \* \*\* \* \* \*\*\* \*\* \* \*\*

Consensus:

CATAGgCctTCTATGATtCAGTTGCcgaaGCgAAAACAAGGAGnAAGTgAAT

>Bacillus\_Fam\_73\_20\_7 Nr. of seq. 7 Alignment length(with gaps) = 22  
 Alignment score = 0.655123  
 GCF\_001315165.1\_ASM131516v1\_genomic.fna\_64:18994-19094 Satlength=101 Nr  
 of Repeats=5 RepeatLength=20 seed=TTTTATAGCG Num.seqs=5  
 Similarity=0.515278  
 0 TTTTAT-AGCGA--NTTTCNAT  
 Rev.of\_GCF\_001591625.1\_ASM159162v1\_genomic.fna\_70:0-79 Satlength=80 Nr of  
 Repeats=4 RepeatLength=20 seed=TCGCTGATAA Num.seqs=4 Similarity=1.000000  
 12 TTTTATCAGCGA--CTTTCCT  
 Rev.of\_GCF\_001591625.1\_ASM159162v1\_genomic.fna\_110:11874-11954  
 Satlength=81 Nr of Repeats=4 RepeatLength=20 seed=GGGAAAGTCG Num.seqs=4  
 Similarity=1.000000 19  
 TTTTATCAGCGA--CTTTCCT  
 Rev.of\_GCF\_001315165.1\_ASM131516v1\_genomic.fna\_3:8732-8832 Satlength=101  
 Nr of Repeats=5 RepeatLength=20 seed=TCGCTATAAA Num.seqs=5  
 Similarity=0.631746 11  
 TTTTAT-AGCGA-NTTNTCNT  
 Rev.of\_GCF\_001315165.1\_ASM131516v1\_genomic.fna\_53:86-186 Satlength=101 Nr  
 of Repeats=5 RepeatLength=20 seed=TCGCTATAAA Num.seqs=5  
 Similarity=0.631746 11  
 TTTTAT-AGCGA-NTTTTNCNT  
 GCF\_001315165.1\_ASM131516v1\_genomic.fna\_77:6171-6271 Satlength=101 Nr of  
 Repeats=5 RepeatLength=20 seed=TTTATAGCGA Num.seqs=5 Similarity=0.661905  
 21 TTTTAT-AGCGA-GTTTTACTT  
 Rev.of\_GCF\_001315165.1\_ASM131516v1\_genomic.fna\_213:71-191 Satlength=121  
 Nr of Repeats=6 RepeatLength=20 seed=CGCTATAAAA Num.seqs=6  
 Similarity=0.631313 31  
 TTTTAT-AGCGNAATTTTNCTT

\*\*\*\*\* \*\*\*\* \*\* \*

Consensus:

```

>Bacillus_Fam_74_21_7 Nr. of seq. 7 Alignment length(with gaps) = 22
Alignment score = 0.698413
GCF_001591425.1_ASM159142v1_genomic.fna_1:10873-11167 Satlength=295 Nr of
Repeats=14 RepeatLength=21 seed=TTTATTTATC Num.seqs=14
Similarity=0.725275
0 TTTATTTATCACCGCACTCCG-
Rev.of_GCF_001591425.1_ASM159142v1_genomic.fna_40:10038-10143
Satlength=106 Nr of Repeats=5 RepeatLength=21 seed=TGATAAATAA Num.seqs=5
Similarity=0.733333 11
TTTATTTATCACCGACCNCNG-
Rev.of_GCF_001591425.1_ASM159142v1_genomic.fna_40:16835-16961
Satlength=127 Nr of Repeats=6 RepeatLength=21 seed=TGATAAATAA Num.seqs=6
Similarity=0.762963 11
TTTATTTATCACCGACCCCCG-
Rev.of_GCF_001591425.1_ASM159142v1_genomic.fna_40:19702-19849
Satlength=148 Nr of Repeats=7 RepeatLength=21 seed=TGATAAATAA Num.seqs=7
Similarity=0.794407 11
TTTATTTATCACCGAACGCNT-
Rev.of_GCF_001591425.1_ASM159142v1_genomic.fna_40:23367-23615
Satlength=249 Nr of Repeats=12 RepeatLength=21 seed=TGATAAATAA
Num.seqs=11 Similarity=0.710245
11 TTTATTTATCANCANGANCTCNN-
Rev.of_GCF_001591425.1_ASM159142v1_genomic.fna_62:9174-9363 Satlength=190
Nr of Repeats=9 RepeatLength=21 seed=TGATAAATAA Num.seqs=9
Similarity=0.514245 11
TTTATTTATCAACGA-CTCCNA
GCF_001591425.1_ASM159142v1_genomic.fna_54:21619-21808 Satlength=190 Nr
of Repeats=9 RepeatLength=21 seed=TTATTTATCA Num.seqs=9
Similarity=0.576892
1 TTTATTTATCACCC-AACNCNAG

```

TTTATTTATCAcCGAnCnCnn

```

>Bacillus_Fam_75_22_7  Nr. of seq. 7 Alignment length(with gaps) = 22
Alignment score = 0.622655
GCF_001645685.2_ASM164568v2_genomic.fna_1:3341360-3341445 Satlength=86 Nr
of Repeats=4 RepeatLength=21 seed=TTTACTCGCC Num.seqs=3
Similarity=0.686869 0
TTTACTCGCCAATTTAGCGAC-
Rev.of_GCF_001645685.2_ASM164568v2_genomic.fna_1:4482743-4483219
Satlength=477 Nr of Repeats=13 RepeatLength=21 seed=TGGCGAGTAA
Num.seqs=11 Similarity=0.662534
11 TTTACTCGCCAAATTAGCGNG-
Rev.of_GCF_001645685.2_ASM164568v2_genomic.fna_1:4454332-4454416
Satlength=85 Nr of Repeats=4 RepeatLength=21 seed=TTGGCGAGTA Num.seqs=4
Similarity=0.682540 12
TTTACTCGCCAAATTTG-GATG

```

GCF\_001645685.2\_ASM164568v2\_genomic.fna\_1:4248891-4249324 Satlength=434  
 Nr of Repeats=5 RepeatLength=21 seed=ACTCGCCAAT Num.seqs=3  
 Similarity=0.957672 3  
 TTTACTCGCCAA-TTCAGCACT  
 GCF\_001645685.2\_ASM164568v2\_genomic.fna\_1:4241205-4241656 Satlength=452  
 Nr of Repeats=10 RepeatLength=21 seed=TTACTCGCCA Num.seqs=6  
 Similarity=0.818687 23  
 TTTACTCGCCAATTTGNGCACT  
 Rev.of\_GCF\_001645685.2\_ASM164568v2\_genomic.fna\_1:4466835-4466919  
 Satlength=85 Nr of Repeats=4 RepeatLength=21 seed=TCGCGAGTAA Num.seqs=4  
 Similarity=0.596618 11  
 TTTACTCGCGAATTTGTCNACT  
 GCF\_001591665.1\_ASM159166v1\_genomic.fna\_66:6860-6944 Satlength=85 Nr of  
 Repeats=4 RepeatLength=21 seed=TTTACTCGCG Num.seqs=4 Similarity=0.600242  
 0 TTTACTCGCGAATTCTGNCATN

\*\*\*\*\* \*\* \*

Consensus:

TTTACTCGCcAAtTTngnnAcn

>Bacillus\_Fam\_76\_21\_7 Nr. of seq. 7 Alignment length(with gaps) = 21  
 Alignment score = 0.702948  
 GCF\_001591425.1\_ASM159142v1\_genomic.fna\_25:49292-49439 Satlength=148 Nr  
 of Repeats=7 RepeatLength=21 seed=TTACTTAACA Num.seqs=7  
 Similarity=0.550725  
 0 TTACTTAACAAGTNTTGAAA-  
 Rev.of\_GCF\_001591425.1\_ASM159142v1\_genomic.fna\_38:25074-25221  
 Satlength=148 Nr of Repeats=7 RepeatLength=21 seed=TGTTAAGTAA Num.seqs=7  
 Similarity=0.761149 10  
 TTACTTAACANGTANTGAAAA  
 Rev.of\_GCF\_001591425.1\_ASM159142v1\_genomic.fna\_88:2823-2970 Satlength=148  
 Nr of Repeats=7 RepeatLength=21 seed=TGTTAAGTAA Num.seqs=7  
 Similarity=0.667423 10  
 TTACTTAACANGTATTNAAAN  
 Rev.of\_GCF\_001591425.1\_ASM159142v1\_genomic.fna\_5:44236-44383  
 Satlength=148 Nr of Repeats=7 RepeatLength=21 seed=CTGTTAAGTA Num.seqs=5  
 Similarity=0.659420 11  
 ATACTTAACAGCTTTTCAAAA  
 GCF\_001591425.1\_ASM159142v1\_genomic.fna\_161:2289-2478 Satlength=190 Nr of  
 Repeats=9 RepeatLength=21 seed=TTACTTAACA Num.seqs=9 Similarity=0.738977  
 21 TTACTTAACAGCNTTTCAAAA  
 GCF\_001591425.1\_ASM159142v1\_genomic.fna\_16:280-445 Satlength=166 Nr of  
 Repeats=6 RepeatLength=21 seed=ACTTAACAGA Num.seqs=4 Similarity=0.622475  
 23 TTACTTAACAAATTGACAAAA  
 GCF\_001591425.1\_ASM159142v1\_genomic.fna\_34:0-104 Satlength=105 Nr of  
 Repeats=5 RepeatLength=21 seed=TTACTTAACA Num.seqs=5 Similarity=0.746032  
 42 TTACTTAACAACCTTTCCAAAT

\*\*\*\*\* \*\*\*

Consensus:

TTACTTAACAnnTtttcAAAa

>Bacillus\_Fam\_77\_15\_7 Nr. of seq. 7 Alignment length(with gaps) = 16  
Alignment score = 0.610119  
GCF\_000009825.1\_ASM982v1\_genomic.fna\_1:3550903-3551497 Satlength=595 Nr  
of Repeats=11 RepeatLength=15 seed=CCTGGTTCTT Num.seqs=7  
Similarity=0.741799  
0 CCTGGTTCTTCAGTN-  
Rev.of\_GCF\_000305495.1\_BacPsy2.0\_genomic.fna\_17:24629-24719 Satlength=91  
Nr of Repeats=6 RepeatLength=15 seed=GGTACTGAAA Num.seqs=6  
Similarity=0.946667 2  
CCTGGTTTTCAGTA-  
GCF\_002019645.1\_ASM201964v1\_genomic.fna\_1:2043017-2043122 Satlength=106  
Nr of Repeats=7 RepeatLength=15 seed=CCAGGCTCTT Num.seqs=7  
Similarity=0.915344 0  
CCAGGCTCTTCAGTA-  
GCF\_900142675.1\_IMG-  
taxon\_2654588196\_annotated\_assembly\_genomic.fna\_7:329335-329959  
Satlength=625 Nr of Repeats=10 RepeatLength=15 seed=TCGGTGCCTG  
Num.seqs=8 Similarity=0.888889 9  
CCTGGCTCTTCGGTG-  
Rev.of\_GCF\_001591585.1\_ASM159158v1\_genomic.fna\_18:75061-75166  
Satlength=106 Nr of Repeats=7 RepeatLength=15 seed=GGAGCAGAAG Num.seqs=7  
Similarity=0.881481 1 -  
CCGGTTCTTCTGCTC  
GCF\_002019645.1\_ASM201964v1\_genomic.fna\_1:5231068-5231188 Satlength=121  
Nr of Repeats=7 RepeatLength=15 seed=TCTTCTGTTC Num.seqs=6  
Similarity=0.851852 5  
-CCGGTTCTTCTGTTC  
Rev.of\_GCF\_002019645.1\_ASM201964v1\_genomic.fna\_1:422359-422539  
Satlength=181 Nr of Repeats=11 RepeatLength=15 seed=GATCCAGGAA  
Num.seqs=10 Similarity=0.796543  
7 -CTGGATCTTCTGTTC

\* \* \* \* \*

Consensus:

cCtGGtTCTTCnGTn

>Bacillus\_Fam\_78\_12\_7 Nr. of seq. 7 Alignment length(with gaps) = 12  
Alignment score = 0.830688  
GCF\_000025805.1\_ASM2580v1\_genomic.fna\_1:1178251-1178455 Satlength=205 Nr  
of Repeats=12 RepeatLength=12 seed=CGGCGAGTAG Num.seqs=8  
Similarity=0.908730 0  
CGGCGAGTAGAA  
GCF\_000025825.1\_ASM2582v1\_genomic.fna\_1:1189082-1189262 Satlength=181 Nr  
of Repeats=12 RepeatLength=12 seed=CGAGTAGAAC Num.seqs=11  
Similarity=0.919192 3  
CGGCGAGTAGAA  
Rev.of\_GCF\_000225265.1\_ASM22526v1\_genomic.fna\_1:3779323-3779479  
Satlength=157 Nr of Repeats=13 RepeatLength=12 seed=CTACTCGCCG  
Num.seqs=13 Similarity=0.854701  
10 CGGCGAGTAGAA  
GCF\_000025805.1\_ASM2580v1\_genomic.fna\_1:1377397-1377736 Satlength=340 Nr  
of Repeats=26 RepeatLength=12 seed=AGAACGGCGA Num.seqs=24

```

Similarity=0.884461 8
CGGCGAGAAGAA
GCF_000025805.1_ASM2580v1_genomic.fna_1:1377397-1377820 Satlength=424 Nr
of Repeats=29 RepeatLength=12 seed=AGAACGGCGA Num.seqs=24
Similarity=0.884461 8
CGGCGAGAAGAA
Rev.of_GCF_000242895.2_ASM24289v3_genomic.fna_1:2771381-2771945
Satlength=565 Nr of Repeats=41 RepeatLength=12 seed=CTACTCGTCG
Num.seqs=35 Similarity=0.758242
10 CGACGAGTAGAG
Rev.of_GCF_000956595.1_ASM95659v1_genomic.fna_17:23745-23997
Satlength=253 Nr of Repeats=21 RepeatLength=12 seed=CTACTCGCCG
Num.seqs=21 Similarity=0.863492
10 CGGCGAGTAGTG

** **** **
Consensus:

CGGCGAGtAGAA

>Bacillus_Fam_79_12_7 Nr. of seq. 7 Alignment length(with gaps) = 12
Alignment score = 0.640212
GCF_000331575.1_ASM33157v1_genomic.fna_1:153900-154010 Satlength=111 Nr
of Repeats=7 RepeatLength=12 seed=ATTTTGATT Num.seqs=5
Similarity=0.777778
0 ATTTTGATTTTG
GCF_000331575.1_ASM33157v1_genomic.fna_4:18792-18873 Satlength=82 Nr of
Repeats=5 RepeatLength=12 seed=GTGTGATGTTG Num.seqs=4 Similarity=1.000000
2 ATGTGTGATGTTG
Rev.of_GCF_001591625.1_ASM159162v1_genomic.fna_36:9709-9757 Satlength=49
Nr of Repeats=4 RepeatLength=12 seed=TCAAAGTCAA Num.seqs=4
Similarity=0.702991 1
ACTTTGACTTTG
Rev.of_GCF_000496285.1_ASM49628v1_genomic.fna_1:1498693-1498783
Satlength=91 Nr of Repeats=5 RepeatLength=12 seed=CAATATCAAC Num.seqs=3
Similarity=0.851852 0
CTGTTGATATTG
Rev.of_GCF_001315085.1_ASM131508v1_genomic.fna_9:7125-7221 Satlength=97
Nr of Repeats=7 RepeatLength=12 seed=CAACAACAGC Num.seqs=5
Similarity=0.800000 9
CTGTTGTTGTTG
Rev.of_GCF_001578185.1_ASM157818v1_genomic.fna_1:771792-772062
Satlength=271 Nr of Repeats=8 RepeatLength=12 seed=TCAACAGCAA Num.seqs=5
Similarity=0.911111 7
CTGTTGACCTTG
Rev.of_GCF_001420595.1_ASM142059v1_genomic.fna_11:2152936-2153020
Satlength=85 Nr of Repeats=7 RepeatLength=12 seed=TCAACAACAA Num.seqs=7
Similarity=0.851852 7
TTGTTGAGTTTG

*** ***
Consensus:

nTgTTGAtnTTG

```

>Bacillus\_Fam\_80\_52\_6 Nr. of seq. 6 Alignment length(with gaps) = 58  
Alignment score = 0.624904  
GCF\_000759675.1\_ASM75967v1\_genomic.fna\_125:36622-37090 Satlength=469 Nr  
of Repeats=9 RepeatLength=52 seed=CGGTCACTCA Num.seqs=9  
Similarity=0.875356  
0 -CGGTCACTCATAG--GGTAGATGAGAGCCCGAGAATAGTTAAAAGAAGGAAG-TG--  
GCF\_000759675.1\_ASM75967v1\_genomic.fna\_130:33497-34016 Satlength=520 Nr  
of Repeats=10 RepeatLength=52 seed=AGATGAGAGC Num.seqs=9  
Similarity=0.860399  
16 -CGGTCACTCATAG--GGTAGATGAGAGCCCGTGAATAGCTAAAAGAAGGAAG-AG--  
Rev.of\_GCF\_000759675.1\_ASM75967v1\_genomic.fna\_134:133322-134102  
Satlength=781 Nr of Repeats=15 RepeatLength=52 seed=AGTGACCGCT  
Num.seqs=15 Similarity=0.888889  
8 -CGGTCACTCATAA--AGTAGATGAGAGCCCGNGAATAGCAAAAAGAAGAAAG-AG--  
Rev.of\_GCF\_000759675.1\_ASM75967v1\_genomic.fna\_134:112507-112871  
Satlength=365 Nr of Repeats=7 RepeatLength=52 seed=ATGAGTGACC Num.seqs=7  
Similarity=0.958486 11 -  
TGGTCACTCATAGC-GGT-TATGAGAGCCCGGAAACAGCAAAAAGGAGAAAG-AG--  
Rev.of\_GCF\_000759675.1\_ASM75967v1\_genomic.fna\_151:23767-24183  
Satlength=417 Nr of Repeats=8 RepeatLength=52 seed=TCATCACCTT Num.seqs=8  
Similarity=0.877289 22 -  
CGGTCACTCATAA-AGGT-GATGAGAGCCCGAAGACTGCAAAAAGAAG--AGCTGA-  
Rev.of\_GCF\_000759675.1\_ASM75967v1\_genomic.fna\_153:338216-338424  
Satlength=209 Nr of Repeats=4 RepeatLength=52 seed=TAAGATTACG Num.seqs=4  
Similarity=0.965812 38  
GCGGTCACTCATAA-GGGTA-ATGAGAGCCCGT-AAT-CTTATAATAAG--AGCAGAA

\*\*\*\*\* \*\* \*\*\*\*\* \* \* \*\* \*\* \*\* \*  
Consensus:

CGGTCACTCATAAgGTagATGAGAGCCCGngAAtaGcaAAAAGAAGnaAGaG

>Bacillus\_Fam\_81\_52\_6 Nr. of seq. 6 Alignment length(with gaps) = 57  
Alignment score = 0.684016  
GCF\_000621445.1\_ASM62144v1\_genomic.fna\_2:115234-115494 Satlength=261 Nr  
of Repeats=5 RepeatLength=52 seed=ATGAAGGACA Num.seqs=5  
Similarity=0.823899  
75 GAGAAAGTGCCTTCATAAAGG-GAATGAAGGACAAAAGTAGT--GAGAAAC-AG-AG  
GCF\_000621445.1\_ASM62144v1\_genomic.fna\_2:130298-130558 Satlength=261 Nr  
of Repeats=5 RepeatLength=52 seed=TGAAGGACAA Num.seqs=5  
Similarity=0.920513  
75 CAAAAGTGCCTTCATAAAGGNGA-TGAAGGACAAAACAAG---GAGAAAC-CGAAG  
Rev.of\_GCF\_000621445.1\_ASM62144v1\_genomic.fna\_3:128510-128771  
Satlength=262 Nr of Repeats=5 RepeatLength=52 seed=ATGAAGGACA Num.seqs=4  
Similarity=0.901709 119  
CAAAAGTGCCTTCATAAAGGTGA-TGAAGGACAAAACAAG---GAGAAAG-CGAAG  
Rev.of\_GCF\_000621445.1\_ASM62144v1\_genomic.fna\_3:303079-303287  
Satlength=209 Nr of Repeats=4 RepeatLength=52 seed=TATGAAGGAC Num.seqs=4  
Similarity=0.888889 120  
CGAAAGTGCCTTCATAAAGGCGA-TGAAGGACAAAAGAAG---GAGAAAA-CGAAG  
GCF\_000621445.1\_ASM62144v1\_genomic.fna\_20:46586-46794 Satlength=209 Nr of  
Repeats=4 RepeatLength=52 seed=AGAAAGTGTC Num.seqs=4 Similarity=0.828189  
103 --AAAGTGCCTTCATAAAGGCGA-TGAAGGACAAAACGAG-AGGAAAAACTTG-AG

Rev.of\_GCF\_900104555.1\_IMG-  
taxon\_2651870172\_annotated\_assembly\_genomic.fna\_19:114955-115475  
Satlength=521 Nr of Repeats=9 RepeatLength=52 seed=ATGAAGGACT Num.seqs=7  
Similarity=0.797766 83 --AGTGAATC-AGATGGAAAA-  
AGTCCTTCATAGAGCTGA-TGAAGGACAAAACCAG

\* \*        \*\*        \*   \*\*        \*\*                        \*        \*

Consensus:

GGAGAAAccGaAGcaAAAGTGTCTTCATAAAGGnGATGAAGGACAAAcaA

>Bacillus\_Fam\_82\_52\_6 Nr. of seq. 6 Alignment length(with gaps) = 57  
Alignment score = 0.644444  
GCF\_000153365.1\_ASM15336v1\_genomic.fna\_10:208343-208606 Satlength=264 Nr  
of Repeats=5 RepeatLength=53 seed=AAAAGGAGCA Num.seqs=3  
Similarity=0.855967  
0        AAAAG-GAGCAGTCATGTATCCCGGGAGGAGTGC GGGATGCATGAG-TG-G-GTCGA  
Rev.of\_GCF\_000473245.1\_ASM47324v1\_genomic.fna\_1:2810130-2811347  
Satlength=1218 Nr of Repeats=23 RepeatLength=53 seed=GA CTGCTCCT  
Num.seqs=21 Similarity=0.867984  
13        AAAAG-GAGCAGTCATGTATCCCGGGAGGAGTGC GGGATACATGAG-TG-G-GTCGA  
GCF\_000153365.1\_ASM15336v1\_genomic.fna\_12:72983-73301 Satlength=319 Nr of  
Repeats=6 RepeatLength=53 seed=TCATGTATTC Num.seqs=6 Similarity=0.948008  
9        -GAAG-G-GCAGTCATGTATTCCGGGAGCGTTCCGGGATACATGAGCTGTG-CTCGG  
GCF\_000473245.1\_ASM47324v1\_genomic.fna\_1:1054274-1054592 Satlength=319 Nr  
of Repeats=6 RepeatLength=53 seed=TCATGTATTC Num.seqs=6  
Similarity=0.948008 9  
-GAAG-G-GCAGTCATGTATTCCGGGAGCGTTCCGGGATACATGAGCTGTG-CTCGG  
Rev.of\_GCF\_000153365.1\_ASM15336v1\_genomic.fna\_18:460556-461987  
Satlength=1432 Nr of Repeats=27 RepeatLength=53 seed=ACTCATGTAC  
Num.seqs=25 Similarity=0.833795  
46        AAAAGAG-GAAGTCATGTATGCCGGGATCGTTTTGGAGTACATGAG-TG-GTGT-GA  
GCF\_000473245.1\_ASM47324v1\_genomic.fna\_1:491395-492826 Satlength=1432 Nr  
of Repeats=27 RepeatLength=53 seed=GTACATGAGT Num.seqs=27  
Similarity=0.833934 89  
AAAAGAG-GAAGTCATGTATGCCGGGATCGTTTTGGAGTACATGAG-TG-GTGT-GA

\*\*\* \* \* \*\*\*\*\* \* \*\*\*\*\* \*    \*\* \* \*\*\*\*\* \*\* \* \* \*

Consensus:

aaAAGGGcAGTCATGTATnCcGGGAgcgtTncGGgaTACATGAGTGGgTcGa

>Bacillus\_Fam\_83\_52\_6 Nr. of seq. 6 Alignment length(with gaps) = 56  
Alignment score = 0.775397  
GCF\_000752395.1\_Bacillus\_andreraoultii\_genomic.fna\_23:1814-2438  
Satlength=625 Nr of Repeats=12 RepeatLength=52 seed=AACCCATTTT  
Num.seqs=12 Similarity=0.899276  
0        AACC--CA-TTTTCGCGAAATCCTCTTCATTTTCGGCTCATAG-ACTCACTCTATG  
GCF\_000752395.1\_Bacillus\_andreraoultii\_genomic.fna\_23:79057-79681  
Satlength=625 Nr of Repeats=12 RepeatLength=52 seed=TTCTATGAAC  
Num.seqs=12 Similarity=0.757766  
45        AACC-AC--TTTTCGCGAAATCCTCATCATTTTNGGCTCATAGAACTC-TTCTATG  
GCF\_000752395.1\_Bacillus\_andreraoultii\_genomic.fna\_24:6181-8365  
Satlength=2185 Nr of Repeats=42 RepeatLength=52 seed=TTCTATGAAC



Num.seqs=42 Similarity=0.829254  
 45 AACC-AC--TTTTCGCGAAATCCACATCATTTTCGGCTCATAGAACTC-TTCTATG  
 GCF\_000752395.1\_Bacillus\_andreraoultii\_genomic.fna\_24:948-3548  
 Satlength=2601 Nr of Repeats=50 RepeatLength=52 seed=TTCTATGAAC  
 Num.seqs=50 Similarity=0.770286  
 45 AACC-AC--TTTTCGTGAAATCCNCATCATTTTNGGCTCATAGAACTC-TTCTATG  
 Rev.of\_GCF\_000752395.1\_Bacillus\_andreraoultii\_genomic.fna\_41:405982-  
 406190 Satlength=209 Nr of Repeats=4 RepeatLength=52 seed=GGTTCATAGA  
 Num.seqs=4 Similarity=0.769392 56  
 AACCNAC--TTTTCGCGGAATCCCCATCATTTTCGGCTCATAGCACTC-TTCTATG  
 Rev.of\_GCF\_000752395.1\_Bacillus\_andreraoultii\_genomic.fna\_41:77609-78025  
 Satlength=417 Nr of Repeats=8 RepeatLength=52 seed=GGTTCATAGA Num.seqs=8  
 Similarity=0.812390 4 AACC--C-  
 TTTTTTGC GGAATCCCAATCATTTTTGGCTCATAGANCAC-TTCTATG

\*\*\*\* \* \*\*\*\* \* \* \*\*\*\*\* \*\*\*\*\* \* \* \*\*\*\*\*  
 Consensus:

AACCaCTTTTCGCGaAATCCnCATCATTTTcGGCTCATAGaACTCTTCTATG

>Bacillus\_Fam\_84\_53\_6 Nr. of seq. 6 Alignment length(with gaps) = 56  
 Alignment score = 0.659127  
 GCF\_000708755.2\_ASM70875v2\_genomic.fna\_2:1053748-1054173 Satlength=426 Nr  
 of Repeats=8 RepeatLength=53 seed=CTTTGCTTAC Num.seqs=7  
 Similarity=0.857442 0  
 CTTTGCTTACCCTGCTNACCCGTTTTT-TCCGCT-TTGCTGGGTAAGATTC-CTCC  
 GCF\_000709935.2\_ASM70993v2\_genomic.fna\_4:308519-308731 Satlength=213 Nr  
 of Repeats=4 RepeatLength=53 seed=CTTTGCTTAC Num.seqs=4  
 Similarity=0.836478  
 0 CTTTGCTTACCCTGCTCACCCTTTTTT-TCCGCT-TTGCGGGTAGGATTC-CTCC  
 GCF\_000708755.2\_ASM70875v2\_genomic.fna\_6:66915-67179 Satlength=265 Nr of  
 Repeats=5 RepeatLength=53 seed=GGGTACGATT Num.seqs=4 Similarity=0.878407  
 38 CTTTGCTTACCCTGCCATGCCGTTTT-T-CACTCTTGCTGGGTACGATTC-ATCC  
 Rev.of\_GCF\_000709935.2\_ASM70993v2\_genomic.fna\_1:463602-463814  
 Satlength=213 Nr of Repeats=4 RepeatLength=53 seed=AGGGTAAGCA Num.seqs=4  
 Similarity=0.878407 66  
 TTTTGCTTACCCTCCCAATTCGGTTTTT-T-CGCTCTTGCTGGGTACGATTC-CGGC  
 Rev.of\_GCF\_000708755.2\_ASM70875v2\_genomic.fna\_22:9836-10048 Satlength=213  
 Nr of Repeats=4 RepeatLength=53 seed=AAAAACGGTT Num.seqs=4  
 Similarity=0.823899 26  
 -TTTGCTTACCCACCCCAACCGTTTTT-T-CGGTCTAGCTGGGTACGATTCACCTCC  
 GCF\_000709935.2\_ASM70993v2\_genomic.fna\_5:333641-333853 Satlength=213 Nr  
 of Repeats=4 RepeatLength=53 seed=TTTGCTTACC Num.seqs=4  
 Similarity=0.844864  
 54 -TTTGCTTACCCTCCACCACC-TGGTTTTT-CGGCTTGCTGGGTACGATTCACCTCC

\*\*\*\*\* \* \* \*\* \* \* \* \* \* \* \* \*  
 Consensus:

cTTTGCTTACCCTcCccAncCgtTTTTTCGcTcTTTGCTGGGTAcGATTCCTCC

>Bacillus\_Fam\_85\_52\_6 Nr. of seq. 6 Alignment length(with gaps) = 55  
 Alignment score = 0.734949

GCF\_000177235.2\_ASM17723v2\_genomic.fna\_1:18889-19512 Satlength=624 Nr of Repeats=10 RepeatLength=52 seed=CACTCAACGA Num.seqs=7  
 Similarity=0.815403  
 0 CACTCAACGAAGGTAATCAT--AGTAAGCCAATGCTACCCCAAAA-CCAAACCCG  
 GCF\_000177235.2\_ASM17723v2\_genomic.fna\_1:2263203-2263619 Satlength=417 Nr of Repeats=8 RepeatLength=52 seed=AAGGTAATCA Num.seqs=8  
 Similarity=0.794974 9  
 CACTCAACAAAGGTAATCATA-AGCAAG-CAATGCTACCCCAAAA-CCAAACCCG  
 GCF\_000177235.2\_ASM17723v2\_genomic.fna\_1:44519-44779 Satlength=261 Nr of Repeats=5 RepeatLength=52 seed=CAATGCTACC Num.seqs=5 Similarity=0.752830  
 27 CACTCAACGAAGGTCATCATA-NGCAAG-CAATGCTACCCCAAAA-GCTAATCCT  
 GCF\_000177235.2\_ASM17723v2\_genomic.fna\_1:113351-113768 Satlength=418 Nr of Repeats=8 RepeatLength=52 seed=AAGGTCATCA Num.seqs=7  
 Similarity=0.714286  
 61 CACTCAACGAAGGTCATCATA-AGCAAG-CAATGCTNCCCCAAAA-CCAAANCCN  
 Rev.of\_GCF\_000177235.2\_ASM17723v2\_genomic.fna\_1:2555929-2556137  
 Satlength=209 Nr of Repeats=4 RepeatLength=52 seed=AGCATTGCTT Num.seqs=4  
 Similarity=0.691468 34  
 CATTCAACGAAGGTCATCATAGAG-AAG-CAATGCTGCCCCAAAAGCCAAACCT-  
 Rev.of\_GCF\_000177235.2\_ASM17723v2\_genomic.fna\_1:2730527-2730944  
 Satlength=418 Nr of Repeats=8 RepeatLength=52 seed=CTATGATGAC Num.seqs=7  
 Similarity=0.678424 74  
 CAATCCACGAAGGTCATCATAGAG-AAG-CAATGCTGCCCCGAAAATCCAAAANN-

\*\* \*\* \* \*\*\*\*\* \* \*\* \* \*\*\*\*\* \*\* \* \*\*\*\* \* \*\*

Consensus:

CAcTCAACGAAGGTcATCATAAGcAAGCAATGCTaCCCCAAAACCAAACcn

>Bacillus\_Fam\_86\_53\_6 Nr. of seq. 6 Alignment length(with gaps) = 55  
 Alignment score = 0.654545  
 GCF\_001636335.1\_ASM163633v1\_genomic.fna\_1:186192-186660 Satlength=469 Nr of Repeats=9 RepeatLength=52 seed=CTAGATTTTC Num.seqs=9  
 Similarity=0.938746  
 0 CTAGA-TTTTCTGTTTCGTTTCGGGGTTCAATAGACCT-TATAGAAGCCCCCTTTTCG-  
 GCF\_001636335.1\_ASM163633v1\_genomic.fna\_1:3084736-3085256 Satlength=521  
 Nr of Repeats=10 RepeatLength=52 seed=AAGACTCTTT Num.seqs=10  
 Similarity=0.920798 40  
 CTGGATTTTTCG-TCGTTTCGGGGTTCTATACACCT-TATTGAAGACTCTTTTCG-  
 Rev.of\_GCF\_001636335.1\_ASM163633v1\_genomic.fna\_1:1182339-1183064  
 Satlength=726 Nr of Repeats=14 RepeatLength=52 seed=TCAATAAGGT  
 Num.seqs=12 Similarity=0.878399  
 40 C--GATTTTCTGTTCATTTCAGGGCTCTATACACCT-TATTGAAGACTCTTTCAA  
 GCF\_001636335.1\_ASM163633v1\_genomic.fna\_1:3149857-3150741 Satlength=885  
 Nr of Repeats=17 RepeatLength=52 seed=ATTGAGGACT Num.seqs=17  
 Similarity=0.854638 87  
 CT-GA-TTTTCTGTTTCGTTTCGGGCCTCTATACGGCT-GATTGAGGACTCTTTTCAT  
 Rev.of\_GCF\_001636335.1\_ASM163633v1\_genomic.fna\_2:190727-191455  
 Satlength=729 Nr of Repeats=14 RepeatLength=52 seed=AACGAAAAAA  
 Num.seqs=14 Similarity=0.822203  
 13 CT-ATTTTTTC-GTTCGTTTCGGGGTTCTAT-CTGCNCTATTGAGGACTCTTTTCG  
 Rev.of\_GCF\_001636335.1\_ASM163633v1\_genomic.fna\_2:192943-193202  
 Satlength=260 Nr of Repeats=5 RepeatLength=52 seed=AAGAGTCCTC Num.seqs=4

Similarity=0.914530

48

CT-GTTTTTTC-GTTCGTTTCGGGGTCTAT-CTGCTCTATTGAGGACTCTTCCGC

\*       \*\*\*\*\* \* \*\* \*\*\* \*\*   \*\* \*\*       \*   \*\* \*\* \* \* \*\*\* \*

Consensus:

CTGatTTTTcTGTTCGTTTCGGGGtTCTATaCacCTTATTGAaGACTCTTTCgn

>Bacillus\_Fam\_87\_52\_6 Nr. of seq. 6 Alignment length(with gaps) = 53

Alignment score = 0.628512

GCF\_001636315.1\_ASM163631v1\_genomic.fna\_1:2367649-2367858 Satlength=210

Nr of Repeats=4 RepeatLength=52 seed=TCTACGTTAC Num.seqs=3

Similarity=0.717172

0

TCTACGTTACCCAA-GCC-CTATTTTTCTCCGNTTCGGGCACCTAGAACCCC

GCF\_001636315.1\_ASM163631v1\_genomic.fna\_1:247094-247354 Satlength=261 Nr

of Repeats=5 RepeatLength=52 seed=AACCTCTCTA Num.seqs=5

Similarity=0.910256

46 TCTACGTGACCACACGAC-CACATTTTCATCCGGTTCGGTCACGTAGAACCTC

GCF\_001636315.1\_ASM163631v1\_genomic.fna\_1:263113-263529 Satlength=417 Nr

of Repeats=8 RepeatLength=52 seed=ACCTTTTCT Num.seqs=8

Similarity=0.888278

70 TCTACGTGACCCAACATC-ACCTTTTCTTCNGCTACGGTCACGTAGAACCTC

GCF\_001636315.1\_ASM163631v1\_genomic.fna\_1:4729327-4729587 Satlength=261

Nr of Repeats=5 RepeatLength=52 seed=TCTACGTGAC Num.seqs=5

Similarity=0.871795

104

TCTACGTGACCGAACAAAC-CCCTTTTTCTTCGGCTACGGTCACGTAGAACCTC

GCF\_000612665.1\_FF4\_genomic.fna\_50:1971-2335 Satlength=365 Nr of

Repeats=6 RepeatLength=52 seed=TGTTTTTCGGT Num.seqs=5 Similarity=0.897436

29 TCTACGTGACCCATTTTCATTCTTTCTTCT-GTTTTTCGGTCGCGTAGAACCCC

GCF\_000612665.1\_FF4\_genomic.fna\_72:27-391 Satlength=365 Nr of Repeats=7

RepeatLength=52 seed=TCTACGTGAC Num.seqs=7 Similarity=0.823300

53 TCTACGTGACCC-GTGTCACTGGTTTTTATCCATTTCGGTCGCGTAGAACCTC

\*\*\*\*\* \*       \*       \*\* \*       \*       \*\*\* \*       \*\*\*\*\* \*

Consensus:

TCTACGTGACCcaacgtCctctTTTTcnTCcgnTtCGGTCaCGTAGAACcTc

>Bacillus\_Fam\_88\_52\_6 Nr. of seq. 6 Alignment length(with gaps) = 53

Alignment score = 0.782809

GCF\_001375535.1\_Bacillus\_niameyensis\_genomic.fna\_6:97548-97860

Satlength=313 Nr of Repeats=6 RepeatLength=52 seed=GTCAATCGTT Num.seqs=6

Similarity=0.803145

0

GTCAATCGTTACCGTTTTCACAGTAGATCAACTCATTACGGGCACGATTC-ACC

GCF\_001375535.1\_Bacillus\_niameyensis\_genomic.fna\_6:2964303-2964563

Satlength=261 Nr of Repeats=5 RepeatLength=52 seed=CAATCGTTAC Num.seqs=5

Similarity=0.928205

2

GTCAATCGTTACCGTTTTCACAGAAGATCAGCTCATTACGGGCACGATTC-AGT

Rev.of\_GCF\_001375535.1\_Bacillus\_niameyensis\_genomic.fna\_6:3681028-3687820

Satlength=6793 Nr of Repeats=123 RepeatLength=52 seed=AATGAGTTGA

Num.seqs=122 Similarity=0.935809

36

GTCAATCGTTACCGTTTTCACAGAAGTTCAACTCATTATGGGCACGATTC-AGT

Rev.of\_GCF\_001375535.1\_Bacillus\_niameyensis\_genomic.fna\_6:3691066-3691326

Satlength=261 Nr of Repeats=5 RepeatLength=52 seed=GAATCGTGCC Num.seqs=5

Similarity=0.900000 49  
GTCAATCGTTACCGTTTCACAGAAGTTCAACTCATTATGGGCACGATTC-AGT  
GCF\_001375535.1\_Bacillus\_niameyensis\_genomic.fna\_6:1865881-1866297  
Satlength=417 Nr of Repeats=8 RepeatLength=52 seed=AGAAGATCAG Num.seqs=8  
Similarity=0.939560 20  
GTCAATCGTTACCATTTTCACAGAAGATCAGTGCATTACGGGCACGATTC-AGC  
Rev.of\_GCF\_001375535.1\_Bacillus\_niameyensis\_genomic.fna\_6:3933103-3935130  
Satlength=2028 Nr of Repeats=39 RepeatLength=52 seed=GAATCGTTCC  
Num.seqs=38 Similarity=0.998650 48 CT-  
TATCGTTACCGTTTTTCCGGAGTTCATCACATAACGGGAACGATTCAAGA

\* \* \* \* \*

Consensus:

GTCAATCGTTACCGTTTCACAGaAGaTCAaCtCATTAcGGGCACGATTCAGt

>Bacillus\_Fam\_89\_53\_6 Nr. of seq. 6 Alignment length(with gaps) = 53  
Alignment score = 0.780503  
GCF\_001439965.1\_ASM143996v1\_genomic.fna\_104:39216-39670 Satlength=455 Nr  
of Repeats=9 RepeatLength=52 seed=AGCAAAAATG Num.seqs=7  
Similarity=0.803235  
0 AG-CAAAAATGTGTGTCCAAGGCGGAAGTGGAGACACATTACGAAGGAAAAAC  
GCF\_001887185.1\_ASM188718v1\_genomic.fna\_175:122798-123214 Satlength=417  
Nr of Repeats=8 RepeatLength=52 seed=AGTGGAGACA Num.seqs=8  
Similarity=0.709821 25  
AG-CAACAATGTGTGTCCAAGGCGNAAGTGGAGACACATGACGAAGGAAAAAC  
GCF\_002009555.1\_ASM200955v1\_genomic.fna\_90:39540-39956 Satlength=417 Nr  
of Repeats=8 RepeatLength=52 seed=AGTGGAGACA Num.seqs=8  
Similarity=0.709821  
25 AG-CAACAATGTGTGTCCAAGGCGNAAGTGGAGACACATGACGAAGGAAAAAC  
GCF\_001439965.1\_ASM143996v1\_genomic.fna\_125:141897-142307 Satlength=411  
Nr of Repeats=8 RepeatLength=52 seed=AAAAATGTGTG Num.seqs=7  
Similarity=0.755189 5  
GGTCAAAAATGTGTGTCCAAGGNGAGAGTGGAGACAGATAATGAGGAAAAAA-  
Rev.of\_GCF\_002009555.1\_ASM200955v1\_genomic.fna\_334:40008-40529  
Satlength=522 Nr of Repeats=10 RepeatLength=52 seed=TGTCTCCACT  
Num.seqs=9 Similarity=0.772792  
36 GGTCAAAAATGTGTGTCTCAGAGGNGAGAGTGGAGACAGATAATGAGGAAAAAA-  
GCF\_001887185.1\_ASM188718v1\_genomic.fna\_106:36381-37057 Satlength=677 Nr  
of Repeats=13 RepeatLength=52 seed=AGTGGAGACA Num.seqs=13  
Similarity=0.812623 26  
GGNCAAAAATGTGTGTCCAAGGCAAGAGTGGAGACAGATAATGAGGGAAAAA-

\* \* \* \* \*

Consensus:

aGnCAAaAATGTGTGTCCAAGGcGaaAGTGGAGACAcATaAcGAaGgAAAAAc

>Bacillus\_Fam\_90\_42\_6 Nr. of seq. 6 Alignment length(with gaps) = 42  
Alignment score = 0.812169  
GCF\_000007825.1\_ASM782v1\_genomic.fna\_1:4624384-4624759 Satlength=376 Nr  
of Repeats=9 RepeatLength=42 seed=TCTTCCACTT Num.seqs=8  
Similarity=0.875283  
0 TCTTCCACTTGTGGTTCTACTACCACCTGCTGCACTGGGCGT

GCF\_000831065.1\_ASM83106v1\_genomic.fna\_1:4382555-4382849 Satlength=295 Nr of Repeats=7 RepeatLength=42 seed=TCTTCCACTT Num.seqs=7  
 Similarity=0.860922 0  
 TCTTCCACTTGTGGTTCTGCTACTACTTGCTGCACTGGGTGC  
 GCF\_000007845.1\_ASM784v1\_genomic.fna\_1:4485994-4486366 Satlength=373 Nr of Repeats=9 RepeatLength=42 seed=TCTTCCACTT Num.seqs=7  
 Similarity=0.900227  
 0 TCTTCCACTTGTGGTTCCACTACTACTTGCTGCACTGGGTTTT  
 Rev.of\_GCF\_000290995.1\_Baci\_cere\_AND1407\_G13175\_V1\_genomic.fna\_2:177294-177504 Satlength=211 Nr of Repeats=5 RepeatLength=42 seed=GAACCACAAG Num.seqs=5 Similarity=0.892063 17  
 TCTTCCACTTGTGGTTCCACTACTACTTGCTGCACTGGGTTTT  
 Rev.of\_GCF\_000832605.1\_ASM83260v1\_genomic.fna\_1:1288569-1288821 Satlength=253 Nr of Repeats=6 RepeatLength=42 seed=TGCAGCAAGT Num.seqs=6 Similarity=0.833850 34  
 TCTTCCACTTGNGGTTCTACTACCACTTGCTGCATCGGTTTT  
 Rev.of\_GCF\_000775975.1\_ASM77597v1\_genomic.fna\_1:181687-181855 Satlength=169 Nr of Repeats=4 RepeatLength=42 seed=TGCAGCAAGT Num.seqs=4 Similarity=0.825397 34  
 TCTTCTGCTTGTGGTTCTACTACCACTTGCTGCATTGGCTTT

\*\*\*\*\*    \*\*\*\*\*    \*\*\*\*\*    \*\*\*\*\*    \*\*    \*\*\*\*\*    \*\*

Consensus:

TCTTCCACTTGTGGTTCTACTACcACTTGCTGCACtGGtTtT

>Bacillus\_Fam\_91\_20\_6 Nr. of seq. 6 Alignment length(with gaps) = 22  
 Alignment score = 0.625758  
 GCF\_001712755.1\_ASM171275v1\_genomic.fna\_4:95498-95778 Satlength=281 Nr of Repeats=14 RepeatLength=20 seed=AATTTAATTG Num.seqs=14  
 Similarity=0.761120  
 8 ATACCCGGAA-TTTAATTGC-G  
 GCF\_001712755.1\_ASM171275v1\_genomic.fna\_4:102562-102861 Satlength=300 Nr of Repeats=14 RepeatLength=20 seed=GAAATTAATT Num.seqs=13  
 Similarity=0.916239 27  
 ATTCACGGAA-ATTAATTGC-G  
 Rev.of\_GCF\_001712755.1\_ASM171275v1\_genomic.fna\_32:127615-127715 Satlength=101 Nr of Repeats=5 RepeatLength=20 seed=GCAATTAAAT Num.seqs=3  
 Similarity=0.866667 19  
 ATTCTCTTAA-TTTAATTGC-G  
 GCF\_001712755.1\_ASM171275v1\_genomic.fna\_2:242324-242407 Satlength=84 Nr of Repeats=4 RepeatLength=21 seed=TTTAATTGCA Num.seqs=3  
 Similarity=0.626263  
 31 ATTCNCTAGA-TTTAATTGCAG  
 Rev.of\_GCF\_001712755.1\_ASM171275v1\_genomic.fna\_13:327923-328123 Satlength=201 Nr of Repeats=10 RepeatLength=20 seed=CGCAATTAAA Num.seqs=8 Similarity=0.668831  
 41 ATTCTCTAGATTTTAATTGC-G  
 Rev.of\_GCF\_001712755.1\_ASM171275v1\_genomic.fna\_32:95561-95681 Satlength=121 Nr of Repeats=6 RepeatLength=20 seed=GCAATTAAAA Num.seqs=4  
 Similarity=0.753968 19  
 GTTTTTCGG-ATTTTAATTGC-G

\*    \*\*\*\*\*    \*    \*    \*

Consensus:

aATTTAATTGCGATTCTcgg

```
>Bacillus_Fam_92_21_6  Nr. of seq. 6 Alignment length(with gaps) = 22
Alignment score = 0.633333
GCF_000175075.1_ASM17507v1_genomic.fna_2:18020-18125 Satlength=106 Nr of
Repeats=5 RepeatLength=21 seed=AAGTCGGAAT Num.seqs=5 Similarity=0.828571
0   AAGTCGGAAT-TCGGCGGAATA
GCF_000307875.1_BABA1.0_genomic.fna_123:41009-41093 Satlength=85 Nr of
Repeats=4 RepeatLength=21 seed=TTGGCGGAAT Num.seqs=4 Similarity=0.506667
10  AACTAGAAAG-TTGGCGGAATA
Rev.of_GCF_001591445.1_ASM159144v1_genomic.fna_38:10093-10301
Satlength=209 Nr of Repeats=7 RepeatLength=21 seed=ATTCCGCCAA Num.seqs=5
Similarity=0.556944                                     20
AACTAGTAAN-TTGGCGGAATA
GCF_001591665.1_ASM159166v1_genomic.fna_21:145523-145647 Satlength=125 Nr
of Repeats=4 RepeatLength=21 seed=TTGGCGGAAT Num.seqs=3
Similarity=0.516908                                     10
AACT-CAAANNTTGGCGGAATN
GCF_001591665.1_ASM159166v1_genomic.fna_16:71486-71593 Satlength=108 Nr
of Repeats=5 RepeatLength=21 seed=TTGGCGGAAT Num.seqs=4
Similarity=0.585648
10  AAAGTCAAAN-TTGGCGGAATA
GCF_001591665.1_ASM159166v1_genomic.fna_21:87303-87605 Satlength=303 Nr
of Repeats=11 RepeatLength=21 seed=TTGGCGGAAT Num.seqs=10
Similarity=0.478905                                     10
AANGNANAAG-TTGGCGGAATA
```

\*\* \*\* \* \*\*\*\*\*

Consensus:

AActngaAAAnTTGGCGGAATA

```
>Bacillus_Fam_93_21_6  Nr. of seq. 6 Alignment length(with gaps) = 22
Alignment score = 0.603030
GCF_001889165.1_ASM188916v1_genomic.fna_1:473933-474227 Satlength=295 Nr
of Repeats=14 RepeatLength=21 seed=ATCGCGGAAT Num.seqs=14
Similarity=0.849294                                     0
ATCGCG-GAAAGGAGTGCCGGA
GCF_001889165.1_ASM188916v1_genomic.fna_1:757324-757654 Satlength=331 Nr
of Repeats=6 RepeatLength=21 seed=GAATCGCGGA Num.seqs=5
Similarity=0.873016
19  ATCGCG-GAAAGAGGTGCCGGA
Rev.of_GCF_001889165.1_ASM188916v1_genomic.fna_1:3509098-3509350
Satlength=253 Nr of Repeats=12 RepeatLength=21 seed=TCCGCGATTA
Num.seqs=12 Similarity=0.755599
29  ATCGCG-GAAAGAGGTGCCGTA
GCF_001889165.1_ASM188916v1_genomic.fna_1:684231-684378 Satlength=148 Nr
of Repeats=7 RepeatLength=21 seed=GAATCGCGGA Num.seqs=7
Similarity=0.927438
19  ATCGCG-GAAAGAGAGGTCCGGA
Rev.of_GCF_001889165.1_ASM188916v1_genomic.fna_1:3632787-3633039
Satlength=253 Nr of Repeats=12 RepeatLength=21 seed=TCCGCGATTCT
```

Num.seqs=12 Similarity=0.772957

8 ATCGCG-GATAGGAGNGTCGGA

Rev.of\_GCF\_001889165.1\_ASM188916v1\_genomic.fna\_1:3348404-3348982

Satlength=579 Nr of Repeats=18 RepeatLength=21 seed=CTTTCGCGA

Num.seqs=16 Similarity=0.700116

3 AAGGGGTGATGGAATCG-CGGA

\* \* \* \* \*

Consensus:

ATCGCGGAaAGaagtGcCGGA

>Bacillus\_Fam\_94\_21\_6 Nr. of seq. 6 Alignment length(with gaps) = 21

Alignment score = 0.647619

GCF\_000508325.1\_BAVI\_1\_genomic.fna\_103:54980-55146 Satlength=167 Nr of Repeats=7 RepeatLength=21 seed=ATTTGCGCAA Num.seqs=6 Similarity=0.517460

0 ATTTGCGCAAACCTNACGNTTA

GCF\_001591805.1\_ASM159180v1\_genomic.fna\_7:208460-208544 Satlength=85 Nr of Repeats=4 RepeatLength=21 seed=TTATTTCGCC Num.seqs=4

Similarity=0.640212

19 ATTTGCGCAAACCTCAGGATTT

GCF\_001591805.1\_ASM159180v1\_genomic.fna\_5:205275-205400 Satlength=126 Nr of Repeats=6 RepeatLength=21 seed=ATTTGCGCAA Num.seqs=5

Similarity=0.822222

0 ATTTGCGCAAACCNAGCAATA

GCF\_001591445.1\_ASM159144v1\_genomic.fna\_22:80175-80280 Satlength=106 Nr of Repeats=5 RepeatLength=21 seed=ATTCCGCCAA Num.seqs=5

Similarity=0.473611

0 ATTCCGCCAAATNNCNGATTT

Rev.of\_GCF\_001591665.1\_ASM159166v1\_genomic.fna\_21:177804-177908

Satlength=105 Nr of Repeats=5 RepeatLength=21 seed=TTGGCGGAAT Num.seqs=3 Similarity=0.727273 10

ATTCCGCCAAACTTCGGATTA

Rev.of\_GCF\_001591445.1\_ASM159144v1\_genomic.fna\_25:3465-3548 Satlength=84 Nr of Repeats=4 RepeatLength=21 seed=TTGGCGGAAT Num.seqs=3

Similarity=0.430556 10

ATTCCGCCAANTNGCNATTT

\*\*\* \* \* \* \*

Consensus:

ATTcCGCCAAACtnaggATTa

>Bacillus\_Fam\_95\_20\_6 Nr. of seq. 6 Alignment length(with gaps) = 20

Alignment score = 0.731111

GCF\_000374565.1\_ASM37456v1\_genomic.fna\_3:124095-124776 Satlength=682 Nr of Repeats=32 RepeatLength=20 seed=ATACTCTTCA Num.seqs=22

Similarity=0.695355 0

ATACTCTTCACATTTGCGAA

GCF\_000374565.1\_ASM37456v1\_genomic.fna\_18:12540-13648 Satlength=1109 Nr of Repeats=51 RepeatLength=20 seed=ATACTCTTCA Num.seqs=33

Similarity=0.575442 0

ATACTCTTCANAATTCAGAA

Rev.of\_GCF\_000374565.1\_ASM37456v1\_genomic.fna\_4:170298-171100  
 Satlength=803 Nr of Repeats=32 RepeatLength=20 seed=AAGAGTATTT  
 Num.seqs=23 Similarity=0.639118  
 8 ATACTCTTCACTTTCAAGNA  
 Rev.of\_GCF\_000374565.1\_ASM37456v1\_genomic.fna\_30:38245-38545  
 Satlength=301 Nr of Repeats=14 RepeatLength=20 seed=AAGTGAAGAG  
 Num.seqs=13 Similarity=0.779487  
 13 ATACTCTTCACTTTTCGGGAA  
 GCF\_000374565.1\_ASM37456v1\_genomic.fna\_34:28543-28664 Satlength=122 Nr of  
 Repeats=5 RepeatLength=20 seed=TACTCTTCAC Num.seqs=3 Similarity=0.777778  
 21 TTACTCTTCACTTTTCGAGAA  
 Rev.of\_GCF\_000374565.1\_ASM37456v1\_genomic.fna\_38:0-139 Satlength=140 Nr  
 of Repeats=7 RepeatLength=20 seed=AAGTGAAGAG Num.seqs=7  
 Similarity=0.888889  
 13 ATACTCTTCACTTTCCGCAA

\*\*\*\*\* \* \*

Consensus:

ATACTCTTCACTTTcgaGAA

>Bacillus\_Fam\_96\_15\_6 Nr. of seq. 6 Alignment length(with gaps) = 15  
 Alignment score = 0.751111  
 GCF\_000007825.1\_ASM782v1\_genomic.fna\_1:953796-953898 Satlength=103 Nr of  
 Repeats=4 RepeatLength=15 seed=TAAACAAGAA Num.seqs=3 Similarity=0.644444  
 0 TAAACAAGAAAATAC  
 GCF\_000831065.1\_ASM83106v1\_genomic.fna\_1:794707-794809 Satlength=103 Nr  
 of Repeats=4 RepeatLength=15 seed=TAAACAAGAA Num.seqs=3  
 Similarity=0.644444  
 0 TAAACAAGAAAATAC  
 Rev.of\_GCF\_000831065.1\_ASM83106v1\_genomic.fna\_2:182684-182786  
 Satlength=103 Nr of Repeats=4 RepeatLength=15 seed=TTCTTGTTTA Num.seqs=3  
 Similarity=0.644444 10  
 TAAACAAGAAAATAC  
 GCF\_000225265.1\_ASM22526v1\_genomic.fna\_1:1128295-1128356 Satlength=62 Nr  
 of Repeats=4 RepeatLength=15 seed=AAAAGAAAAA Num.seqs=3  
 Similarity=0.847222  
 3 TGAAAAAGAAAAAGC  
 GCF\_000474275.1\_Bmar1.0\_genomic.fna\_8:157466-157541 Satlength=76 Nr of  
 Repeats=5 RepeatLength=15 seed=AAATAGAAAA Num.seqs=5 Similarity=1.000000  
 17 TAAATAGAAAAAGC  
 Rev.of\_GCF\_000712615.1\_ASM71261v1\_genomic.fna\_2:274011-274086  
 Satlength=76 Nr of Repeats=5 RepeatLength=15 seed=TCTTCTTTTT Num.seqs=5  
 Similarity=0.822222 12  
 TAAAAAAGAAGAAGC

\* \*\* \*\*\*\*\* \*

Consensus:

TAAAaAAGAAAAaC

>Bacillus\_Fam\_97\_12\_6 Nr. of seq. 6 Alignment length(with gaps) = 12  
 Alignment score = 0.807407



GCF\_000311725.1\_ASM31172v1\_genomic.fna\_9:43921-43981 Satlength=61 Nr of Repeats=5 RepeatLength=12 seed=GGTTCTGGCT Num.seqs=5 Similarity=1.000000  
0 GGTCTGGCTTT  
Rev.of\_GCF\_001700275.1\_ASM170027v1\_genomic.fna\_45:377163-377241  
Satlength=79 Nr of Repeats=4 RepeatLength=12 seed=CCAAAGCCAG Num.seqs=3  
Similarity=1.000000 2  
GGTCTGGCTTT  
Rev.of\_GCF\_001439635.1\_ASM143963v1\_genomic.fna\_175:44104-44236  
Satlength=133 Nr of Repeats=9 RepeatLength=12 seed=GAACCAGAAC Num.seqs=6  
Similarity=0.814815 5  
GGTCTGGCTTT  
GCF\_000972245.2\_ASM97224v2\_genomic.fna\_1:3422882-3423134 Satlength=253 Nr of Repeats=21 RepeatLength=12 seed=GGATTTGGTT Num.seqs=21  
Similarity=0.971429 6  
GGTCTGGATTT  
Rev.of\_GCF\_001742425.1\_ASM174242v1\_genomic.fna\_25:16787-17924  
Satlength=1138 Nr of Repeats=16 RepeatLength=12 seed=CCAGAACCAA  
Num.seqs=10 Similarity=0.775309  
8 GGTCTGGTTTT  
Rev.of\_GCF\_000612805.1\_FF3\_genomic.fna\_1:431588-431636 Satlength=49 Nr of Repeats=4 RepeatLength=12 seed=CCAGAGCCAA Num.seqs=4 Similarity=0.888889  
2 GGCTTTGGCTCT

\*\* \* \*\*\* \* \*

Consensus:

GGTCTGGcTTT

>Bacillus\_Fam\_98\_52\_5 Nr. of seq. 5 Alignment length(with gaps) = 61  
Alignment score = 0.610929  
GCF\_000186145.1\_Bacillus\_sp\_2\_A\_57\_CT2\_V1\_genomic.fna\_2:72771-73392  
Satlength=622 Nr of Repeats=12 RepeatLength=52 seed=TCATGGCGAC 78  
Num.seqs=10 Similarity=0.852422  
TNTCA-ATTTT-CGGCTT-CATG-AA-CCC-TTCATGGCGACCA--TTTTCT-TCTCTGGT  
Rev.of\_GCF\_000186145.1\_Bacillus\_sp\_2\_A\_57\_CT2\_V1\_genomic.fna\_9:73399-73710 Satlength=312 Nr of Repeats=6 RepeatLength=52 seed=GAAAAATGGT  
Num.seqs=5 Similarity=0.848718 95 TC-  
CTGATTTT-CGGCTT-CATG-AAGCGC-T-CATGGCGACCAT-TTTTCT--CTTTGCT  
Rev.of\_GCF\_000294775.2\_ASM29477v2\_genomic.fna\_1:1168663-1168919  
Satlength=257 Nr of Repeats=5 RepeatLength=52 seed=GAAAAATGGT Num.seqs=3  
Similarity=0.811966 95 TC-  
CTGATTTT-CGGCTT-CATG-AAGTGC-T-CATGGCGACCAT-TTTTCT--CTTTGCT  
Rev.of\_GCF\_000294775.2\_ASM29477v2\_genomic.fna\_1:900085-900448  
Satlength=364 Nr of Repeats=7 RepeatLength=52 seed=TGAAGCCGAA Num.seqs=6  
Similarity=0.810256 121  
TC-CT--TTTT-CGGCTT-CATG--AGAGCTT-CATGGCGACCAT-TTTTCTGGCTCTGGT  
Rev.of\_GCF\_000186145.1\_Bacillus\_sp\_2\_A\_57\_CT2\_V1\_genomic.fna\_4:197835-198199 Satlength=365 Nr of Repeats=7 RepeatLength=52 seed=ATGAAGCCGA  
Num.seqs=7 Similarity=0.710758 83  
TTTCT---TATCGCTNC-ACG-ACTTTTCGGCTTCATG-ACTGC-CT-CATGGCGACCG-T

\* \*\* \* \* \* \*

Consensus:

tttctnctctGnTTcCtatTtTcggcttCatgaagngctcatgGcgaccatT

>Bacillus\_Fam\_99\_61\_5 Nr. of seq. 5 Alignment length(with gaps) = 61  
Alignment score = 0.663934  
GCF\_000161455.1\_ASM16145v1\_genomic.fna\_1:4024244-4024484 Satlength=241 Nr of Repeats=4 RepeatLength=60 seed=CCTGTTTGCA Num.seqs=4  
Similarity=0.752205 0  
CCTGTTTGCAATGCTCCGCTTCCGTTGAAGTAGTACCATGTACCG-TTAATTGCTTGCCAG  
Rev.of\_GCF\_000496285.1\_ASM49628v1\_genomic.fna\_1:4380225-4380585  
Satlength=361 Nr of Repeats=6 RepeatLength=60 seed=GCGATGCAAA Num.seqs=6  
Similarity=0.896296 14  
CCTGTTTGCAATGCTCCGCTTCCGTTGAAGTAATACCATGTCCGTTTACCTGC-TGCCAA  
GCF\_000712595.1\_ASM71259v1\_genomic.fna\_14:75165-75465 Satlength=301 Nr of Repeats=5 RepeatLength=60 seed=TTTGCAATTGC Num.seqs=5 Similarity=0.806557  
4 CCTTTTTGCATTGCACCGTTTCCATTAAAGTAGTACCATGTCCATTTA-TTGCTTGCCAA  
Rev.of\_GCF\_000712595.1\_ASM71259v1\_genomic.fna\_10:96270-96750  
Satlength=481 Nr of Repeats=8 RepeatLength=60 seed=ACATGGTACT Num.seqs=8  
Similarity=0.801587 41  
CCTGTTTGCAATGTACCGTTTTTCGTTTAAAGTAGTACCATGTCCACCAATTTG-TTTCCAT  
Rev.of\_GCF\_000496285.1\_ASM49628v1\_genomic.fna\_1:3570725-3571145  
Satlength=421 Nr of Repeats=7 RepeatLength=60 seed=TGGCAATCAA Num.seqs=7  
Similarity=0.880423 59  
CCNGTTAACATTGCACCTTCACCATTTAAGTAGTACCATTTACCACCTA-TTGATTGCCAA

\*\* \*\* \*\*\* \* \*\* \* \*\* \*\*\*\*\* \*\*\*\*\* \*\* \* \*\* \* \*\*\*  
Consensus:

CCTgTTtgCATtGcaCCgttttcCgTTnAAGTAgTACCATGgttCCanttAntTGctTgCCAA

>Bacillus\_Fam\_100\_52\_5 Nr. of seq. 5 Alignment length(with gaps) = 59  
Alignment score = 0.628531  
GCF\_000759675.1\_ASM75967v1\_genomic.fna\_48:7-215 Satlength=209 Nr of Repeats=4 RepeatLength=52 seed=AGAGTGTGCC Num.seqs=4 Similarity=0.888889  
0 AG-AGTGTGCCTAGTGACC-AAAAG---TAAGAT-AGGAATCCATAGAAAGTGGTCACA-  
GCF\_000759675.1\_ASM75967v1\_genomic.fna\_150:19-279 Satlength=261 Nr of Repeats=5 RepeatLength=52 seed=GTGACCAAAA Num.seqs=5 Similarity=0.866667  
12 AG-AGTGCCTAGTGACC-AAAAG---TAAGCT-CGGAATCCATAGAAAGTGGTCACA-  
Rev.of\_GCF\_000759675.1\_ASM75967v1\_genomic.fna\_164:20-228 Satlength=209 Nr of Repeats=4 RepeatLength=52 seed=ACCACTTCTA Num.seqs=4  
Similarity=0.850427 48  
AG-AGTGTGTCTTGTGACC-AAAAG---TAAGCT-CGGAATCCATAGAAAGTGGTCACA-  
Rev.of\_GCF\_000759675.1\_ASM75967v1\_genomic.fna\_151:544090-544350  
Satlength=261 Nr of Repeats=5 RepeatLength=52 seed=CTTGTGACCA Num.seqs=5  
Similarity=0.879487 2  
AGAAGTGA-CCTTGTGACC-AAACGCTGTAA--T--TGAAATCATAAAAGTGGTCACA-  
Rev.of\_GCF\_000759675.1\_ASM75967v1\_genomic.fna\_154:26046-26254  
Satlength=209 Nr of Repeats=4 RepeatLength=52 seed=ATGTGACCAC Num.seqs=4  
Similarity=0.829060 52  
AG-AGCGT-CCTTGTGACCAAAAAGC---AA--TGGTGATTTCATCAAAGTGGTCACAT

\*\* \*\* \* \*\* \*\*\*\*\* \*\*\* \* \*\* \* \*\* \*\*\* \*\*\*\*\*  
Consensus:

AGAGtGtgcCTtGTGACCAAAaGtAAgnTngGAatcCAtagAAGTGGTCACA

>Bacillus\_Fam\_101\_51\_5 Nr. of seq. 5 Alignment length(with gaps) = 58  
Alignment score = 0.637356  
GCF\_000813125.1\_ASM81312v1\_genomic.fna\_86:7113-7633 Satlength=521 Nr of  
Repeats=10 RepeatLength=52 seed=GGAATCGTGA Num.seqs=10  
Similarity=0.880342  
5 ACCTCGGAATCGTGACAGGTTTGGGTGT---G-AAA-GCCGAAAAGCTGTCAAGAAA  
Rev.of\_GCF\_000813125.1\_ASM81312v1\_genomic.fna\_129:103315-103679  
Satlength=365 Nr of Repeats=7 RepeatLength=52 seed=TTTTCTTGAC Num.seqs=7  
Similarity=0.802198 53  
AGCCCGGAATCGTGACAGGTTNGGCAGT---G-AAA-GCCGAAAAGCTGTCAAGAAA  
GCF\_001315165.1\_ASM131516v1\_genomic.fna\_31:17940-18200 Satlength=261 Nr  
of Repeats=5 RepeatLength=52 seed=AAAGCTGTCA Num.seqs=5  
Similarity=0.887179  
37 AGCACGGAATTATGACAGGTTT-GAAGTG--G-AAA-GCGGAAAAGCTGTCAAGAAA  
Rev.of\_GCF\_000813125.1\_ASM81312v1\_genomic.fna\_134:126961-127481  
Satlength=521 Nr of Repeats=9 RepeatLength=52 seed=CCAAAGCTGT Num.seqs=8  
Similarity=0.808625 24  
ACGAAGGAATTATGACAGCTTT-GGAGT---GTAAATGAAGAAAAGCTGTCAAGAAA  
Rev.of\_GCF\_000813125.1\_ASM81312v1\_genomic.fna\_122:32607-32815  
Satlength=209 Nr of Repeats=4 RepeatLength=52 seed=TTTCTTGACA Num.seqs=4  
Similarity=0.858974 52  
ACAAAGGAATTGTGACAGGTAT-GAGGT-TCTG---A-GACCAAAAGCTGTCAAGAAA

\*\*\*\*\* \* \* \* \* \*

Consensus:

GGAATtgTGACAGgTttGnaGTGaaAGccgAAAAGCTGTCAAGAAAAccac

>Bacillus\_Fam\_102\_52\_5 Nr. of seq. 5 Alignment length(with gaps) = 58  
Alignment score = 0.601149  
GCF\_001636315.1\_ASM163631v1\_genomic.fna\_1:3520892-3521308 Satlength=417  
Nr of Repeats=8 RepeatLength=52 seed=AGCCTATTGG Num.seqs=8  
Similarity=0.868486 0  
-AGCCTATTGGCGACATTTCTCTTAG-C-AAAAA--CAACAAAAGTGTTTCCAATAA-  
Rev.of\_GCF\_001636315.1\_ASM163631v1\_genomic.fna\_1:3785428-3785688  
Satlength=261 Nr of Repeats=5 RepeatLength=52 seed=TTGGAAACAC Num.seqs=5  
Similarity=0.820513 49 -  
GGCCTATTGGCGACATTTCTCTTAG-C-AAAAG--CAACAAAAGTGTTTCCAATGG-  
Rev.of\_GCF\_001636315.1\_ASM163631v1\_genomic.fna\_1:3568862-3569174  
Satlength=313 Nr of Repeats=6 RepeatLength=52 seed=ATAGAAATGT Num.seqs=6  
Similarity=0.849573 21 -AG-  
CTATTGGCGACATTTCTATT--CAAAAAGT-CAACATAAGTGTTTCCAATGGC  
Rev.of\_GCF\_001636315.1\_ASM163631v1\_genomic.fna\_1:3535170-3535534  
Satlength=365 Nr of Repeats=7 RepeatLength=52 seed=GTTGTAATTT Num.seqs=7  
Similarity=0.894994 35 CGG-  
CTATTGCCGACAATACT-CTAG--AAAATTACAACCAAAGTGTTTCCAATGG-  
Rev.of\_GCF\_001636315.1\_ASM163631v1\_genomic.fna\_1:3851718-3851925  
Satlength=208 Nr of Repeats=4 RepeatLength=52 seed=CTATTGGAAA Num.seqs=3  
Similarity=0.897436 52 CCG-  
GTATTGGCGACAATACT-TGAGTT-AAAATTGGA--CAAAGTGTTTCCAATAG-

\*   \*   \*   \*   \*   \*   \*   \*   \*   \*   \*   \*   \*   \*   \*   \*   \*   \*   \*   \*   \*   \*   \*

Consensus:

nGcTATTGgCGACAtTtCTnttagcAAAAntcAacaaAAGTGTTTCCAATgg

>Bacillus\_Fam\_103\_53\_5 Nr. of seq. 5 Alignment length(with gaps) = 57  
Alignment score = 0.626901  
GCF\_000708755.2\_ASM70875v2\_genomic.fna\_1:37544-37809 Satlength=266 Nr of  
Repeats=4 RepeatLength=53 seed=CACTCGGTGT Num.seqs=3 Similarity=0.730453  
0 CACTCGGTGT-AGTGGCGCCACAAACAAGG-NTCCAAGT-NCGAG-AAAAGTGGTAT  
GCF\_000709935.2\_ASM70993v2\_genomic.fna\_1:37723-37935 Satlength=213 Nr of  
Repeats=4 RepeatLength=53 seed=CACTCGGTGT Num.seqs=4 Similarity=0.715278  
0 CACTCGGTGT-AGTGGCGCCACAAACAAGG-ATCCAAGT-GCAGG-AAAAGTGGCAT  
Rev.of\_GCF\_000708755.2\_ASM70875v2\_genomic.fna\_2:860672-860884  
Satlength=213 Nr of Repeats=4 RepeatLength=53 seed=TCATTTGTGG Num.seqs=4  
Similarity=0.790356 27  
CACTCTGGGT-AGTGGTGCCACAAATGAGGTAAAC---TCACGAGAAAAAGTGGCAG  
Rev.of\_GCF\_000709935.2\_ASM70993v2\_genomic.fna\_4:114946-115370  
Satlength=425 Nr of Repeats=8 RepeatLength=53 seed=CTGCCACTTT Num.seqs=6  
Similarity=0.817191 53  
CACTCGGGGT-AATGGTGCCACAAATGAGGTAAAC---TCACGAGAAAAAGTGGCAG  
Rev.of\_GCF\_000709935.2\_ASM70993v2\_genomic.fna\_5:581943-582154  
Satlength=212 Nr of Repeats=4 RepeatLength=53 seed=CTGCCACTTT Num.seqs=3  
Similarity=0.714885 53  
CACTC-GAGTGAGTGGCGCCAGAAAAGAGG-ATCC-A-TCACCTGAAAAAGTGGCAG

\*   \*   \*   \*   \*   \*   \*   \*   \*   \*   \*   \*   \*   \*   \*   \*   \*   \*   \*   \*   \*   \*   \*

Consensus:

CACTCgGnGTAgTGGcGCCAcAAAngAGGatcCaTcaCgaGaAAAAAGTGGcAg

>Bacillus\_Fam\_104\_52\_5 Nr. of seq. 5 Alignment length(with gaps) = 56  
Alignment score = 0.618750  
GCF\_000813125.1\_ASM81312v1\_genomic.fna\_40:52980-53241 Satlength=262 Nr of  
Repeats=5 RepeatLength=52 seed=ATGACGGACA Num.seqs=4 Similarity=0.852201  
0 ATGACGGACACTTTTCCTC--TGT-TTCCTTCGATTTCTGTCCGTCATG-GCCTTG  
GCF\_000813125.1\_ASM81312v1\_genomic.fna\_88:27406-27823 Satlength=418 Nr of  
Repeats=8 RepeatLength=52 seed=GATGACGGAC Num.seqs=7 Similarity=0.837607  
51 ATGACGGACAGTTTT-NTCGAT-T-TTCCATCGATTTGTGTCCGTCATG-GCCTTG  
GCF\_000813125.1\_ASM81312v1\_genomic.fna\_75:30268-30683 Satlength=416 Nr of  
Repeats=8 RepeatLength=52 seed=CTGTCCGTCA Num.seqs=7 Similarity=0.828092  
34 ATGACGGACACTTTTT-C-CGGNAC-TTCTCTAATTTCTGTCCGTCATG-ACCTTG  
GCF\_000813125.1\_ASM81312v1\_genomic.fna\_122:22295-22555 Satlength=261 Nr  
of Repeats=5 RepeatLength=52 seed=GATGACGGAC Num.seqs=5  
Similarity=0.798148  
51 ATGACGGACACTTTTT--TC-ATGAGTTCACGNGATTTCTGTCCGTCATA-GCCTNG  
Rev.of\_GCF\_001315165.1\_ASM131516v1\_genomic.fna\_3:27965-28173  
Satlength=209 Nr of Repeats=4 RepeatLength=52 seed=ATGACGGACA Num.seqs=4  
Similarity=0.839099 96  
ATGACGGACACTTTTT--GC-TTCTGTTTCGGTGATTTCTGTCCGTCATACCCCTT-

\*   \*   \*   \*   \*   \*   \*   \*   \*   \*   \*   \*   \*   \*   \*   \*   \*   \*   \*   \*   \*   \*   \*

Consensus:

ATGACGGACAcTTTTntCntntTTcCntngaTTTcTGTCCGTCATggCCTtg

>Bacillus\_Fam\_105\_53\_5 Nr. of seq. 5 Alignment length(with gaps) = 56  
Alignment score = 0.664286  
GCF\_000153365.1\_ASM15336v1\_genomic.fna\_15:302007-302379 Satlength=373 Nr  
of Repeats=7 RepeatLength=53 seed=AGTCATGTAT Num.seqs=6  
Similarity=0.859119  
0 AGTCATGTATCCCAACAAGCA-TCC-GGGATACATAACAAGGCTGAGAAAAGAG-A  
GCF\_000473245.1\_ASM47324v1\_genomic.fna\_1:1507348-1507827 Satlength=480 Nr  
of Repeats=9 RepeatLength=53 seed=AGTCATGTAT Num.seqs=7  
Similarity=0.868224 0  
AGTCATGTATCCCACCGGGCA-TCC-GGGATACATAACCAGGCTGAGAAAAGAG-A  
GCF\_000153365.1\_ASM15336v1\_genomic.fna\_16:360419-360896 Satlength=478 Nr  
of Repeats=9 RepeatLength=53 seed=GGGATACATG Num.seqs=7  
Similarity=0.940102  
24 AGTCATGTACTTCAACAGGC--TCCTGGGATACATGACCCGGCCGTGCAAAGGG-A  
Rev.of\_GCF\_000473245.1\_ASM47324v1\_genomic.fna\_1:2449207-2449684  
Satlength=478 Nr of Repeats=9 RepeatLength=53 seed=CCCTTTGCAC Num.seqs=9  
Similarity=0.938505 52  
AGTCATGTACTTCAACAGGC--TCCTGGGATACATGACCCGGCCGTGCAAAGGG-A  
Rev.of\_GCF\_000473245.1\_ASM47324v1\_genomic.fna\_1:4524426-4525114  
Satlength=689 Nr of Repeats=11 RepeatLength=53 seed=CTGCTTTTGG  
Num.seqs=9 Similarity=0.870021  
21 ACTCATGTATCCCAA-AAGCAGTCT-GAGATACATGACCCGGC-GAAAAAAGCGCA

\* \* \* \* \* \* \* \* \* \* \* \* \* \* \* \* \* \* \* \* \* \* \* \* \* \* \* \* \* \*

Consensus:

AgTCATGTAtccCAacagGCaTCcGgGATACATgACccGGCnGagaAAAAGnGA

>Bacillus\_Fam\_106\_53\_5 Nr. of seq. 5 Alignment length(with gaps) = 56  
Alignment score = 0.671429  
GCF\_900156865.1\_PRJEB18960\_genomic.fna\_3:359545-359916 Satlength=372 Nr  
of Repeats=7 RepeatLength=53 seed=ATGGATAAAA Num.seqs=7  
Similarity=0.881402  
0 ATGGATAAAAATAGGAGAAAGCGAACCAGNAAAGGC-G-T-TAATCATCCACGCAA  
Rev.of\_GCF\_900156865.1\_PRJEB18960\_genomic.fna\_3:1976860-1977284  
Satlength=425 Nr of Repeats=8 RepeatLength=53 seed=TCTCCTAATT Num.seqs=8  
Similarity=0.739443 18  
TTGGATGAAATTAGGAGAAAGCGAACCAGTAAAGTN-G-T-GAATCGTCCTCGCAC  
Rev.of\_GCF\_900156865.1\_PRJEB18960\_genomic.fna\_3:2163225-2163596  
Satlength=372 Nr of Repeats=7 RepeatLength=53 seed=TCTCCTAATT Num.seqs=7  
Similarity=0.766397 18  
ATGGATGAAATTAGGAGAAAGCGAACCAGTAAAGT--G-TCGAATCATCCTCGCAA  
GCF\_900156865.1\_PRJEB18960\_genomic.fna\_3:759210-759634 Satlength=425 Nr  
of Repeats=8 RepeatLength=53 seed=TTGGATAAAA Num.seqs=8  
Similarity=0.710097  
0 TTGGATAAAAATTAGGNAAAGCGAACCCGCAAACTCNG-T--AATCATCCTTGCAA  
Rev.of\_GCF\_900156865.1\_PRJEB18960\_genomic.fna\_3:3854012-3854277  
Satlength=266 Nr of Repeats=4 RepeatLength=53 seed=ATGCAAGGAC Num.seqs=3  
Similarity=0.874214 0  
TTGGGTAAATTTAGGAGAATGCGGACCTGTAAAGGCNGCT---TTCGTCCTTGCA

\*\*\* \* \*\* \*\*\*\*\* \*\* \*\* \*\* \* \*\* \* \* \*\* \*\* \*\*\* \*\*

Consensus:

tTGGaTaAAaAtTAGGaGAAaGCGaACCaGtAAAgTcGTnaaTCaTCcTcGCAa

>Bacillus\_Fam\_107\_52\_5 Nr. of seq. 5 Alignment length(with gaps) = 55  
Alignment score = 0.752727  
BACILLUS\_PSEUDALCALIPHILUS\_genomic.fna\_1:422934-423246 Satlength=313 Nr of  
Repeats=6 RepeatLength=52 seed=GAGTAAAGTA Num.seqs=6 Similarity=0.905660  
0 GAGTAAAGTA-ACGAAAAGAGCCGAACGAGACAGTTACTCGGG-GGAAGTGAGA-  
BACILLUS\_PSEUDALCALIPHILUS\_genomic.fna\_3:348761-349177 Satlength=417 Nr of  
Repeats=8 RepeatLength=52 seed=GAGTAAAGTA Num.seqs=8 Similarity=0.867925  
0 GAGTAAAGTA-ACGAAAAGAGCCGAACGAGACAGTTACTCGAG-GGAAGTGAGT-  
Rev.of\_BACILLUS\_PSEUDALCALIPHILUS\_genomic.fna\_6:81732-82096 Satlength=365  
Nr of Repeats=7 RepeatLength=52 seed=AGTAACTGAC Num.seqs=7  
Similarity=0.762204 38  
GAGTAAAGTA-ACGAAAAGGGCNGAACGTGTCTAGTTACTCGAG-GGAAGTGAGT-  
BACILLUS\_PSEUDALCALIPHILUS\_genomic.fna\_2:122808-123431 Satlength=624 Nr of  
Repeats=12 RepeatLength=52 seed=GTAAAGTAAC Num.seqs=11  
Similarity=0.794282 2  
GAGTAAAGTA-ACGAAAAGAGGCGAACGAGNCAGTTACTCGAG-GGAAGT-AGNT  
BACILLUS\_PSEUDALCALIPHILUS\_genomic.fna\_1:538341-538653 Satlength=313 Nr of  
Repeats=6 RepeatLength=52 seed=TGTCAGTTAC Num.seqs=6 Similarity=0.738272  
27 AAGT-AAGTACACGAAAAGAGCTGAACATGTCTAGTTACT-GAGTGGTAGGGAGG-

\*\*\* \*\*\*\*\* \*\*\*\*\* \* \*\*\*\*\* \* \*\*\*\*\* \* \* \*\* \*\* \*\*

Consensus:

gAGTaAAGTAACGAAAAGaGccGAACgaGnCAGTTACTcGaGGGaAGtgAGn

>Bacillus\_Fam\_108\_52\_5 Nr. of seq. 5 Alignment length(with gaps) = 55  
Alignment score = 0.681818  
BACILLUS\_PSEUDALCALIPHILUS\_genomic.fna\_2:93343-93855 Satlength=513 Nr of  
Repeats=9 RepeatLength=52 seed=TAATGTGCAG Num.seqs=8 Similarity=0.848160  
0 TAATGTGCAGATACTGAG-GAGAAGAG-GGTAGTATCTGCACAAAGA-GGAGGC  
BACILLUS\_PSEUDALCALIPHILUS\_genomic.fna\_5:78874-79289 Satlength=416 Nr of  
Repeats=8 RepeatLength=52 seed=TTAATGTGCA Num.seqs=7 Similarity=0.858341  
51 TAATGTGCAGATACGGAA-GAGAGAAG-GGAGAGTAACTGCACAAAGA-GGCGTT  
BACILLUS\_PSEUDALCALIPHILUS\_genomic.fna\_5:376488-377061 Satlength=574 Nr of  
Repeats=11 RepeatLength=52 seed=TAATGTGCAG Num.seqs=10  
Similarity=0.793621 0  
TAATGTGCAGATANGGAA-GAGAAAAG-AGCTAGTATCTGAACAAAAAGGGCGAT  
BACILLUS\_PSEUDALCALIPHILUS\_genomic.fna\_5:354718-354978 Satlength=261 Nr of  
Repeats=5 RepeatLength=52 seed=GTATCTGCAC Num.seqs=5 Similarity=0.846154  
31 TTATGTGCAGATAAGGAA-GAGT-AAGTAGCCGGTATCTGCACAAAGA-GTCGGT  
BACILLUS\_PSEUDALCALIPHILUS\_genomic.fna\_16:108274-109024 Satlength=751 Nr  
of Repeats=14 RepeatLength=52 seed=AGGCGGTTTA Num.seqs=13  
Similarity=0.902435 45  
TTATGTGCAGATACGGAAGGAGA-AAG-GGCTGGTATCTGTACAAAGA-GGCGGT

\* \*\*\*\*\* \*\* \*\* \*\* \* \*\*\*\*\* \*\* \*\* \*

Consensus:



Consensus:

TGGTAGTTAATCgAGAnGaaTAACGACGAAAAagacgaaggTCnAaGGAAaA

>Bacillus\_Fam\_111\_52\_5 Nr. of seq. 5 Alignment length(with gaps) = 54  
Alignment score = 0.714815  
GCF\_000708755.2\_ASM70875v2\_genomic.fna\_2:1062403-1062663 Satlength=261 Nr  
of Repeats=4 RepeatLength=52 seed=TTTGCTACCC Num.seqs=3  
Similarity=0.777778 0  
TTTGCTACCCCATATTTACCCG-CTCCGTTTTATAAGGATGCATTTTCTT-CT  
GCF\_000709935.2\_ASM70993v2\_genomic.fna\_5:8490-8905 Satlength=416 Nr of  
Repeats=7 RepeatLength=52 seed=TTTGCTACCC Num.seqs=5 Similarity=0.771069  
0 TTTGCTACCCCATATTTACCCG-CTCCGTTTTATAAGGATGCATTTTCTT-CT  
GCF\_000708755.2\_ASM70875v2\_genomic.fna\_6:445956-446216 Satlength=261 Nr  
of Repeats=4 RepeatLength=52 seed=TTTCTTCCTT Num.seqs=3  
Similarity=0.897436  
43 TTTGCTACCCTATATTCGCTCA-CTCCGATTTATAAGGCAGCA-TTTCTTCCT  
GCF\_000709935.2\_ASM70993v2\_genomic.fna\_5:651406-651666 Satlength=261 Nr  
of Repeats=4 RepeatLength=52 seed=TTTCTTCCTT Num.seqs=3  
Similarity=0.897436  
43 TTTGCTACCCTATATTCGCTCA-CTCCGATTTATAAGGCAGCA-TTTCTTCCT  
GCF\_000709935.2\_ASM70993v2\_genomic.fna\_15:49878-50085 Satlength=208 Nr of  
Repeats=4 RepeatLength=52 seed=CCCATATTTTC Num.seqs=3 Similarity=0.725367  
8 TTTGATACCCCATATTTTC-CGCATCCCATTTTTATAGGGATGCATTTTCNC-NT

\*\*\*\* \* \* \* \* \* \* \* \* \* \* \* \* \* \* \* \* \*

Consensus:

TTTGcTACCCcATATTtCnCnCaCtCcgTtTTATAaGGatGCAtTTTcttcT

>Bacillus\_Fam\_112\_52\_5 Nr. of seq. 5 Alignment length(with gaps) = 54  
Alignment score = 0.676543  
GCF\_000708755.2\_ASM70875v2\_genomic.fna\_2:1371598-1372014 Satlength=417 Nr  
of Repeats=8 RepeatLength=52 seed=ACTTATCTCG Num.seqs=8  
Similarity=0.817766 0  
ACTTATCTCGTTTTTC-AGTACCACCAATTTCGGTCTTCCCCTT-CCTTGATGGC  
GCF\_000708755.2\_ASM70875v2\_genomic.fna\_2:1674648-1674960 Satlength=313 Nr  
of Repeats=6 RepeatLength=52 seed=ACTTATCTCG Num.seqs=6  
Similarity=0.808386 0  
ACTTATCTCGGAGTTC-AGAACCACCAACACGCAGATTTCCCTT-TTTTGATGGC  
GCF\_000709935.2\_ASM70993v2\_genomic.fna\_3:97017-97277 Satlength=261 Nr of  
Repeats=5 RepeatLength=52 seed=GATGGCACTT Num.seqs=5 Similarity=0.882051  
46 ACTTATCTCGGAGTTC-AGAACCACCAACACGCAGATTTCCCTT-TTTTGATGGC  
GCF\_000708755.2\_ASM70875v2\_genomic.fna\_6:335157-335781 Satlength=625 Nr  
of Repeats=12 RepeatLength=52 seed=TTGATGGCAC Num.seqs=10  
Similarity=0.807977 44  
ACTTATCNCG-CTTACAAGTACCACCAA-ACTCAGAAATCCTTCTCTTGATGGC  
GCF\_000709935.2\_ASM70993v2\_genomic.fna\_5:541475-541891 Satlength=417 Nr  
of Repeats=8 RepeatLength=52 seed=TTGATGGCAC Num.seqs=8  
Similarity=0.799451  
44 ACTTATCTCG-CTTACAAGTACCACCAA-ACTCAGAAATCCTTCTCTTGATGGC

\*\*\*\*\* \* \* \* \* \* \* \* \* \* \* \* \* \* \* \* \* \*

Consensus:



ACTTATCtCGnntTtCAGtACCACCAAnaCgcagatntCCTTtcTTGATGGC

>Bacillus\_Fam\_113\_52\_5 Nr. of seq. 5 Alignment length(with gaps) = 54  
Alignment score = 0.609877  
GCF\_001636315.1\_ASM163631v1\_genomic.fna\_1:1832094-1832406 Satlength=313  
Nr of Repeats=5 RepeatLength=52 seed=GACAGTTTTG Num.seqs=4  
Similarity=0.846154 0  
GACAGTTTTGCTAGTTTTTTGAAC-TG-GTTTTGTCTTCAAGAACTTATTGAA  
GCF\_001636315.1\_ASM163631v1\_genomic.fna\_1:2472381-2472589 Satlength=209  
Nr of Repeats=4 RepeatLength=52 seed=CTTATTGAAG Num.seqs=4  
Similarity=0.897436 43  
GACAGTTTTAGTAGTTTTTCGCAG-CG-GTTTTGTCTCCAAGAGGCCTTATTGAA  
Rev.of\_GCF\_001636315.1\_ASM163631v1\_genomic.fna\_1:2851663-2851975  
Satlength=313 Nr of Repeats=6 RepeatLength=52 seed=GCATAAAAAA Num.seqs=6  
Similarity=0.938462 24  
GACAGTTTCGATGATTTTTTTATG-CT-GTTTTGTCTTCAAGACGGCTTATTGAA  
Rev.of\_GCF\_001636315.1\_ASM163631v1\_genomic.fna\_1:2942377-2942588  
Satlength=212 Nr of Repeats=4 RepeatLength=52 seed=AAACTGTCTT Num.seqs=3  
Similarity=0.702306 8  
GACAGTTTCTC-AATTTTTGTAG-GGCNGTTTGTCTCCAAGAANCCTTATTGAA  
Rev.of\_GCF\_001636315.1\_ASM163631v1\_genomic.fna\_1:3763475-3763890  
Satlength=416 Nr of Repeats=8 RepeatLength=52 seed=TGTCTTTAAT Num.seqs=5  
Similarity=0.848718 4  
GACA-TTTTCATAAGTTCCTAGGCCG-GGTTTGTCTTCTAGAAGCCTTATTAAA

\*\*\*\* \*\*\* \*\* \*\*\*\*\* \* \*\*\* \*\*\*\*\* \*\*  
Consensus:

GACAgTTTnntaatTTttgaagcggTTTGTCTtCaAGAagcCTTATTgAA

>Bacillus\_Fam\_114\_52\_5 Nr. of seq. 5 Alignment length(with gaps) = 54  
Alignment score = 0.701235  
GCF\_900156875.1\_PRJEB18969\_genomic.fna\_11:799820-800080 Satlength=261 Nr  
of Repeats=5 RepeatLength=52 seed=GATGAGAACC Num.seqs=5  
Similarity=0.915385  
51 ATGAGAACCGAAACAAACGAAACAAGAGAA-GGAAA-CGGTCTTCATCAAGGGG  
GCF\_900156875.1\_PRJEB18969\_genomic.fna\_11:864748-865216 Satlength=469 Nr  
of Repeats=9 RepeatLength=52 seed=TGAGAACCGA Num.seqs=9  
Similarity=0.790598  
53 ATGAGAACCGAAACAACCGCAACAAGAGAA-GGAAC-CGGTCTTCATCAAGAGG  
Rev.of\_GCF\_900156875.1\_PRJEB18969\_genomic.fna\_11:1169427-1169687  
Satlength=261 Nr of Repeats=5 RepeatLength=52 seed=ATGAAGACCG Num.seqs=5  
Similarity=0.884615 97  
ATGAGAACCGAAACAATCGCAGCACGAGAA-GGGAA-CGGTCTTCATTAAGGGA  
Rev.of\_GCF\_900156875.1\_PRJEB18969\_genomic.fna\_11:892286-897590  
Satlength=5305 Nr of Repeats=101 RepeatLength=52 seed=GATGAAGACC  
Num.seqs=100 Similarity=0.834986  
98 ATGAGAACCGTAACCTATCACTGCATGAGAA-GGAAA-CGGTCTTCATCATGGAG  
Rev.of\_GCF\_900156875.1\_PRJEB18969\_genomic.fna\_11:2645550-2646025  
Satlength=476 Nr of Repeats=9 RepeatLength=53 seed=ACCGCTTTCC Num.seqs=7  
Similarity=0.833921 92  
ATGAAGACCGAAACCA-GGTAGGAAGAGAAGGGAAAGCGGTCTTCATNAAGAGA

Consensus :

gATGAgAACCGaAACaAncgcagcAaGAGAAGGaAaCGGTCTTCATcAaGgg

```
>Bacillus_Fam_115_53_5 Nr. of seq. 5 Alignment length(with gaps) = 53
Alignment score = 0.694969
GCF_001590785.1_ASM159078v1_genomic.fna_38:115242-115452 Satlength=211 Nr
of Repeats=4 RepeatLength=52 seed=GGTCAAAAGG Num.seqs=3
Similarity=0.445355 0
GGTCAAAAGGAGNAGCNCTATTACCCGAAAAGCGAG-CGNACCAAGAA--AC
GCF_001590785.1_ASM159078v1_genomic.fna_5:48221-48618 Satlength=398 Nr of
Repeats=8 RepeatLength=52 seed=AACGGTCAAA Num.seqs=6 Similarity=0.712103
49 GGTCAAAAGGAGAAGCGCTATTACCCGAAAAGAGAGCCGCATCA-GAAGAAC
Rev.of_GCF_001590785.1_ASM159078v1_genomic.fna_23:40421-40734
Satlength=314 Nr of Repeats=6 RepeatLength=52 seed=CCTTTTGACC Num.seqs=5
Similarity=0.883019 61
GGTCAAAAGGAGAAGCGCTATTACCCGAAAAGAGAGCCGCACCACGAAA-AC
GCF_001590785.1_ASM159078v1_genomic.fna_25:115-322 Satlength=208 Nr of
Repeats=4 RepeatLength=52 seed=GGTCAAAAGG Num.seqs=3 Similarity=0.675052
0 GGTCAAAAGGCGAAGCTCTATTACCCGAAAAAGGAGCTG-ANCNAGTAGAAC
Rev.of_GCF_001590785.1_ASM159078v1_genomic.fna_3:106756-107171
Satlength=416 Nr of Repeats=7 RepeatLength=52 seed=CCTTTTGACC Num.seqs=6
Similarity=0.797531 10
GGTCAAAAGGAAGAGCTCTATTACCTGAAAAAGNTGGTGAGCCAAGAA-AAG
```

Consensus :

GGTCAAAGGagaAGCnCTATTCACcGAAAAqngaGccGnacCaaGaAnaAc

```
>Bacillus_Fam_116_51_5 Nr. of seq. 5 Alignment length(with gaps) = 53
Alignment score = 0.735220
BACILLUS_PSEUDALCALIPHILUS_genomic.fna_2:381197-381605 Satlength=409 Nr of
Repeats=8 RepeatLength=51 seed=GAGTAACCCC Num.seqs=8 Similarity=0.881525
29 AATCGCGGGGTTGCTGG-TGAAAAA-AGNGGGAGTAACCCCGAGCAAACGGAG
BACILLUS_PSEUDALCALIPHILUS_genomic.fna_10:100326-100580 Satlength=255 Nr
of Repeats=5 RepeatLength=51 seed=AACCCCGAGC Num.seqs=4
Similarity=0.839623 33
AATCGCGGGGTTGCGGG-CGTAAAA-AGAAGGAGTAACCCCGAGCAAACGGTG
Rev.of_BACILLUS_PSEUDALCALIPHILUS_genomic.fna_6:367038-367242
Satlength=205 Nr of Repeats=4 RepeatLength=51 seed=CCGTTTGCTC Num.seqs=4
Similarity=0.865385 49
AATCTCGGGGTACGGGCTGGAAAA-AGCAGGAGGAACCCCGAGCAAACGGAG
Rev.of_BACILLUS_PSEUDALCALIPHILUS_genomic.fna_2:392539-392794
Satlength=256 Nr of Repeats=5 RepeatLength=51 seed=TTGCTCGGGT Num.seqs=5
Similarity=0.869281 45
AATCTCGGGGTTGCAGT-CGGAAAA-AGCAGGAGTAAACCCCGAGCAAACGTGG
BACILLUS_PSEUDALCALIPHILUS_genomic.fna_5:184414-184771 Satlength=358 Nr of
Repeats=7 RepeatLength=51 seed=CCCGAGCAAA Num.seqs=7 Similarity=0.809219
7 GAGTAACCCCGAGCAAATGGA-AATACGCGGGGTTGCGAG-CAGAAAAAGNGG
```

\* \* \* \* \*

Consensus:

aAtcncggttgCnggnGnaAAaaGcaGGagtaacccccgAGcAAAcGgnG

>Bacillus\_Fam\_117\_52\_5 Nr. of seq. 5 Alignment length(with gaps) = 53  
Alignment score = 0.725786  
BACILLUS\_PSEUDALCALIPHILUS\_genomic.fna\_5:475827-476186 Satlength=360 Nr of  
Repeats=7 RepeatLength=51 seed=AGTAACTGAC Num.seqs=5 Similarity=0.926923  
0 AGTAACTGACACGTTTCAGGCGTTTTTCGTGTAGTTACTCACGCC-ACCCCTCC-  
Rev.of\_BACILLUS\_PSEUDALCALIPHILUS\_genomic.fna\_4:117009-117217  
Satlength=209 Nr of Repeats=4 RepeatLength=52 seed=GAGTAACTAC Num.seqs=4  
Similarity=0.948718 38  
AGTAACTGTCATGTTTCAGCCTTTTTTCGTGTAGTTACTCACCTT-CTTCCTTCG  
Rev.of\_BACILLUS\_PSEUDALCALIPHILUS\_genomic.fna\_5:101702-102015  
Satlength=314 Nr of Repeats=6 RepeatLength=52 seed=GTGACAGTTA Num.seqs=5  
Similarity=0.816352 64  
AGTAACTGTCACCTTCAGCCTNNTTTCGTGTGCTTACTCACCTT-CTTCCTCCG  
BACILLUS\_PSEUDALCALIPHILUS\_genomic.fna\_6:91832-92092 Satlength=261 Nr of  
Repeats=5 RepeatLength=52 seed=AGTTACTCAC Num.seqs=5 Similarity=0.883019  
82 AGTAACTGACATGTTTGGCCTTTTTTCGTGCAGTTACTCACGCT-TTTCCTTTG  
BACILLUS\_PSEUDALCALIPHILUS\_genomic.fna\_2:344904-345112 Satlength=209 Nr of  
Repeats=4 RepeatLength=52 seed=AGTAACTGAC Num.seqs=4 Similarity=0.756813  
105 AGTAACTGACATGATTGGCCTTTTTTCGTGCAGTTACTCACCTATTCCCTTCG

\*\*\*\*\* \*\* \* \* \* \*\*\*\*\* \*\*\*\*\* \*\*\*

Consensus:

AGTAACTGaCatgtTcaGcCttTTTCGTGtaGTTACTCACcctnttCCTtcg

>Bacillus\_Fam\_118\_52\_5 Nr. of seq. 5 Alignment length(with gaps) = 53  
Alignment score = 0.699371  
GCF\_001439965.1\_ASM143996v1\_genomic.fna\_125:65382-65694 Satlength=313 Nr  
of Repeats=5 RepeatLength=52 seed=AGGTTACCGA Num.seqs=4  
Similarity=0.752137  
0 AGGTTACCGAGCCCCCGCCATTTACTCCATCCCGGTAACCAAACCTCTCTCTT-  
Rev.of\_GCF\_001887185.1\_ASM188718v1\_genomic.fna\_197:48906-49947  
Satlength=1042 Nr of Repeats=17 RepeatLength=52 seed=GTTCGGTAAC  
Num.seqs=12 Similarity=0.836981  
12 TGGTTACCGAACGCGCGCAATATCGTCCATCCGGGTAACCAATCCCTCTCAA-  
Rev.of\_GCF\_001887185.1\_ASM188718v1\_genomic.fna\_62:29140-29922  
Satlength=783 Nr of Repeats=14 RepeatLength=52 seed=CGGGAATAA  
Num.seqs=12 Similarity=0.786382  
8 -AGTTCCCGTGTCCGCGTAAATCCTCCATCAAGGTAACCAAACGCACTCATT  
GCF\_002009555.1\_ASM200955v1\_genomic.fna\_166:5014-5326 Satlength=313 Nr of  
Repeats=5 RepeatLength=52 seed=ATTAGTTCCC Num.seqs=4 Similarity=0.884615  
49 -AGTTCCCGAGCCGCGAAAAATCCTCCATCAAGGTAACCAAACGCACTCATT  
GCF\_002009555.1\_ASM200955v1\_genomic.fna\_217:22-438 Satlength=417 Nr of  
Repeats=8 RepeatLength=52 seed=CTCCATCAAG Num.seqs=8 Similarity=0.788745  
23 -AGTTCCCGTGCCGCGGAAAAATCCTCCATCAAGGTAACCAATCGCACTCATT

\*\*\* \*\* \* \* \* \*\*\*\*\* \*\*\*\*\* \* \* \*\*\*

Consensus:

aGTTcCCGagccCgGnaAaaTccTCCATCaaGGTAACCAAaCgCaTCatt

>Bacillus\_Fam\_119\_52\_5 Nr. of seq. 5 Alignment length(with gaps) = 53  
Alignment score = 0.620755  
GCF\_900104555.1\_IMG-  
taxon\_2651870172\_annotated\_assembly\_genomic.fna\_7:4560-4976 Satlength=417  
Nr of Repeats=8 RepeatLength=52 seed=GTTTTGTCTA Num.seqs=8  
Similarity=0.776675 0  
GTTTTGTCTAATAGAGCTCTTCTATTGAACAAAACCATTCCTCCGAGA-CATGT  
Rev.of\_GCF\_900104555.1\_IMG-  
taxon\_2651870172\_annotated\_assembly\_genomic.fna\_31:30740-31103  
Satlength=364 Nr of Repeats=7 RepeatLength=52 seed=TTTGTCCGAT Num.seqs=6  
Similarity=0.818449 33  
GTTTTGTCTATTAGAGGGCTTCTATCGGACAAAACCATTGCTC-AGACCATGA  
Rev.of\_GCF\_900104555.1\_IMG-  
taxon\_2651870172\_annotated\_assembly\_genomic.fna\_29:79068-79380  
Satlength=313 Nr of Repeats=6 RepeatLength=52 seed=TCTATTAGAC Num.seqs=6  
Similarity=0.824948 15  
GTTTTGTCTAATAGAGNCCGTCTATTGGACAAATTCCTTGCTC-ACAACAGGG  
Rev.of\_GCF\_900104555.1\_IMG-  
taxon\_2651870172\_annotated\_assembly\_genomic.fna\_25:114221-114585  
Satlength=365 Nr of Repeats=7 RepeatLength=52 seed=GCTCTATTGG Num.seqs=7  
Similarity=0.892552 17  
GTTTTGTCCAATAGAGCTGTCCTATCGAACATAATCTTTGCTC-GGACCTGGT  
GCF\_900104555.1\_IMG-  
taxon\_2651870172\_annotated\_assembly\_genomic.fna\_19:27781-28613  
Satlength=833 Nr of Repeats=16 RepeatLength=52 seed=CTATTGGACA  
Num.seqs=16 Similarity=0.823113 21  
GGTTTGTCTAATAAAGACCCCCTATTGGACAGAATCATCACTCNGGA-CATGT

\* \* \* \* \* \* \* \* \* \* \* \* \* \* \* \* \* \* \* \*

Consensus:

GtTTTTGTCTAaTAgaGnncttCTATtGgACAAaAatCaTtgCtCagAnCatGt

>Bacillus\_Fam\_120\_52\_5 Nr. of seq. 5 Alignment length(with gaps) = 52  
Alignment score = 0.853846  
GCF\_001439965.1\_ASM143996v1\_genomic.fna\_95:54401-54661 Satlength=261 Nr  
of Repeats=5 RepeatLength=52 seed=ACACATTTTT Num.seqs=5  
Similarity=0.800000  
0 ACACATTTTTTCGCTTCTCCCCATGATAATCTGTCTCAGGCATGGCTTCTGAC  
GCF\_001887185.1\_ASM188718v1\_genomic.fna\_5:448-656 Satlength=209 Nr of  
Repeats=4 RepeatLength=52 seed=TGATAATCTG Num.seqs=4 Similarity=0.987179  
22 ACACATTTTTTCGCTTCTCCCCATGATAATCTGTCTCAGGCATGGCTTCTGAC  
Rev.of\_GCF\_001887185.1\_ASM188718v1\_genomic.fna\_11:16345-16813  
Satlength=469 Nr of Repeats=9 RepeatLength=52 seed=TGAGACAGAT Num.seqs=9  
Similarity=0.792181 37  
ACACATTTTTTCGCTTNTCCCCATGATAATCTGTCTCAGGCATGGCTTCTGAC  
GCF\_001439965.1\_ASM143996v1\_genomic.fna\_95:56169-56429 Satlength=261 Nr  
of Repeats=5 RepeatLength=52 seed=AATCTGTCTC Num.seqs=5  
Similarity=0.810256  
26 ACACATTTTTGACCTTTACCTTTGATAATCTGTCTCANGCATGGCCTCTGAC  
GCF\_002009555.1\_ASM200955v1\_genomic.fna\_56:33-448 Satlength=416 Nr of  
Repeats=8 RepeatLength=52 seed=AATCTGTCTC Num.seqs=7 Similarity=0.846154  
26 ACACATTTTTGGCCTTTACCTTTGATAATCTGTCTCAAGTATGGCCTCTGAC

\*\*\*\*\* \* \* \* \* \*\*\*\*\* \* \*\*\*\*\*

Consensus:

ACACATTTTTcgCtTnTcCCcaTGATAATCTGTCTCagGcATGGCtTCTGAC

>Bacillus\_Fam\_121\_52\_5 Nr. of seq. 5 Alignment length(with gaps) = 52

Alignment score = 0.823077

GCF\_001636335.1\_ASM163633v1\_genomic.fna\_1:206310-206778 Satlength=469 Nr

of Repeats=9 RepeatLength=52 seed=TTATTGAACC Num.seqs=9

Similarity=0.753258

0 TTATTGAACCCCGAGCAGGCGAAAAAAGCATCAAAGAGTCTTCAATAGGTG

Rev.of\_GCF\_001636335.1\_ASM163633v1\_genomic.fna\_1:210863-211279

Satlength=417 Nr of Repeats=8 RepeatLength=52 seed=CTATTGAAGA Num.seqs=8

Similarity=0.879155

49

GGATTGAACCCCGAAGTGGCGAAAAAAGCATCAAAGAGTCTTCAATAGAGG

Rev.of\_GCF\_001636335.1\_ASM163633v1\_genomic.fna\_1:3030262-3031197

Satlength=936 Nr of Repeats=17 RepeatLength=52 seed=ATTGAAGACT

Num.seqs=14 Similarity=0.826042

99 CTATTGAACCCCGAACAAGCGAAAAAAGCANCAAAGAGTCTTCAATAGAGG

Rev.of\_GCF\_001636335.1\_ASM163633v1\_genomic.fna\_1:2795926-2796445

Satlength=520 Nr of Repeats=10 RepeatLength=52 seed=TATTGAGGAC

Num.seqs=9 Similarity=0.870720

48 TCATTGAACCCCGAACAAGCGAAAAAACCGTCAAAGCGTCCTCAATAGGGG

Rev.of\_GCF\_001636335.1\_ASM163633v1\_genomic.fna\_1:2827224-2827795

Satlength=572 Nr of Repeats=11 RepeatLength=52 seed=AGGACTCTTT

Num.seqs=10 Similarity=0.822222

95 TCCTTGAACCCCGAACAGGCGAAAAAATCGTCAAAGAGTCCTCAATAGGGG

\*\*\*\*\* \* \*\*\*\*\* \* \*\*\*\*\* \* \*\*\*\*\* \*

Consensus:

tnaTTGAACCCCGAaCagGCGAAAAAAgCatCAAAGaGTcTCAATAGggG

>Bacillus\_Fam\_122\_45\_5 Nr. of seq. 5 Alignment length(with gaps) = 48

Alignment score = 0.736806

GCF\_000007845.1\_ASM784v1\_genomic.fna\_1:3515122-3515563 Satlength=442 Nr

of Repeats=9 RepeatLength=45 seed=ACTGGACCTC Num.seqs=7

Similarity=0.874427

0 ACTGGACCTCAAGGTGTTCAAGG--A-CCAGCAGGTGCTACCGGTGCT

GCF\_000008505.1\_ASM850v1\_genomic.fna\_1:3540669-3543189 Satlength=2521 Nr

of Repeats=56 RepeatLength=45 seed=ACTGGACCTC Num.seqs=45

Similarity=0.827814

0

ACTGGACCTCAAGGTGTTCAAGG--A-CCAGCAGGTGCTACTGGTGCC

Rev.of\_GCF\_000290995.1\_Baci\_cere\_AND1407\_G13175\_V1\_genomic.fna\_3:327060-

327582 Satlength=523 Nr of Repeats=11 RepeatLength=45 seed=CCTTGAGGTC

Num.seqs=9 Similarity=0.787842

14

ACTGGACCTCAAGGTGTTCAAGG--A-CCGGCGGGTGCTACTGGTGCT

GCF\_000831065.1\_ASM83106v1\_genomic.fna\_1:3427920-3429909 Satlength=1990

Nr of Repeats=47 RepeatLength=45 seed=ACTGGACCTC Num.seqs=29

Similarity=0.774327

0

ACTGGACCTCAAGGTGTTCAAGGT-A-ACA-CNGGTGCTACTGGTGCC

GCF\_000017425.1\_ASM1742v1\_genomic.fna\_1:2475569-2477171 Satlength=1603 Nr

of Repeats=43 RepeatLength=45 seed=GGACCTCAAG Num.seqs=30

Similarity=0.881073

3

ACTGGACCTCAAGGGCCTCAAGG-CATCCA--AGGACCTACAGGGGCT

\*\*\*\*\* \* \* \*\* \*\*\*\* \*\* \*

Consensus:

ACTGGACCTCAAGGtgtTCAAGGAcCagcaGGtgCTACtGGtGcT

>Bacillus\_Fam\_123\_39\_5 Nr. of seq. 5 Alignment length(with gaps) = 42

Alignment score = 0.642857

GCF\_000017425.1\_ASM1742v1\_genomic.fna\_1:3517703-3517985 Satlength=283 Nr

of Repeats=8 RepeatLength=36 seed=TTCTTCTATA Num.seqs=6

Similarity=0.987654

0 TTCTTCT-AT-ACGCTGC-TCTTCTTGCTTGCGTTTTTC---

Rev.of\_GCF\_001719185.1\_ASM171918v1\_genomic.fna\_1:3645533-3645689

Satlength=157 Nr of Repeats=4 RepeatLength=39 seed=AAGCAAGAGG Num.seqs=4

Similarity=0.897436

30

TTCTGCTAATCGCGCTTCTTCCTCTTGCTTGCGTTTTTC---

GCF\_000008505.1\_ASM850v1\_genomic.fna\_1:3065080-3065314 Satlength=235 Nr

of Repeats=7 RepeatLength=39 seed=TGCTCTTCTT Num.seqs=5

Similarity=0.938462

13 TTCTACT-CT-TTGCTGC-TCTTCTTGCTTACGTTTTTCTTC

Rev.of\_GCF\_000832605.1\_ASM83260v1\_genomic.fna\_1:1202055-1202214

Satlength=160 Nr of Repeats=4 RepeatLength=39 seed=AAACGTAAGC Num.seqs=3

Similarity=0.977208

33

CTCTACT-CT-TTGTTGC-TCTTCCTGCTTACGTTTTTCTTC

GCF\_000290995.1\_Baci\_cere\_AND1407\_G13175\_V1\_genomic.fna\_1:2060357-2060513

Satlength=157 Nr of Repeats=4 RepeatLength=39 seed=TTTGTTGCTC Num.seqs=4

Similarity=0.874644

47

TTCTGCT-CT-

TTGTTGC-TCTTCTTGCTTACGCTTCTCTTC

\*\*\* \*\* \* \* \* \* \* \*\* \*\*\*\* \*\* \*\* \*

Consensus:

tTCTnCTcTttGcTgCTCtTcTGCTTaCGtTTtTcTtc

>Bacillus\_Fam\_124\_40\_5 Nr. of seq. 5 Alignment length(with gaps) = 42

Alignment score = 0.684127

GCF\_000285535.1\_ASM28553v1\_genomic.fna\_2:812840-813040 Satlength=201 Nr

of Repeats=5 RepeatLength=40 seed=ATTTGCGTCT Num.seqs=5

Similarity=0.753333

0 ATTTGCGTC-TCCTCTANGATTTTTGCGTCGGTTTTCTCAC-

GCF\_000285535.1\_ASM28553v1\_genomic.fna\_31:3-163 Satlength=161 Nr of

Repeats=4 RepeatLength=40 seed=TTTTCTCACA Num.seqs=4 Similarity=0.905556

31 ATTTGCGTC-TCCCCAGCGATTTTTGCGTCGGTTTTCTCAC-

Rev.of\_GCF\_000285535.1\_ASM28553v1\_genomic.fna\_51:18-258 Satlength=241 Nr

of Repeats=7 RepeatLength=40 seed=AGACGCAAAT Num.seqs=5

Similarity=0.743089

50 ATTTGCGTC-TCCCCAGCGATTTTTGCGTCGATTTTCTCAN-

GCF\_000285535.1\_ASM28553v1\_genomic.fna\_2:954754-954914 Satlength=161 Nr

of Repeats=5 RepeatLength=40 seed=TTTTTGCCTC Num.seqs=3

Similarity=0.796748

19 ATTTGCGTC-TTCTCCCTGATTTTTGCGTCGATATCCGCGG-

Rev.of\_GCF\_001439915.1\_ASM143991v1\_genomic.fna\_105:62151-62311  
Satlength=161 Nr of Repeats=5 RepeatLength=40 seed=CGACGCAAAT Num.seqs=3  
Similarity=0.777778 10  
ATTTGCGTCGTGCTC-GAGATTTATGCGTCGTTTGC-CAAT

\*\*\*\*\* \* \* \* \*\*\*\*\* \* \* \* \*  
Consensus:

ATTTGCGTCTcCtCngnGATTTtTGCGTCGgTtTtCtCan

>Bacillus\_Fam\_125\_42\_5 Nr. of seq. 5 Alignment length(with gaps) = 42  
Alignment score = 0.888889  
GCF\_000496285.1\_ASM49628v1\_genomic.fna\_1:3159834-3160296 Satlength=463 Nr  
of Repeats=11 RepeatLength=42 seed=AAAGAAGAAG Num.seqs=11  
Similarity=0.894949 0  
AAAGAAGAAGTAAAAGAGCCGGTAAAAGAAGTTGAAGAAACG  
Rev.of\_GCF\_000775975.1\_ASM77597v1\_genomic.fna\_1:4810089-4810866  
Satlength=778 Nr of Repeats=5 RepeatLength=42 seed=TCTTCTTTTG Num.seqs=4  
Similarity=0.841270 8  
AAAGAAGAAGTAAAAGAGCCGGTAAAAGAAGTTGAAGAAACA  
GCF\_000831065.1\_ASM83106v1\_genomic.fna\_1:383609-384197 Satlength=589 Nr  
of Repeats=14 RepeatLength=42 seed=AAAGAAGAAG Num.seqs=14  
Similarity=0.913134 0  
AAAGAAGAAGTGAAAGAACCGGTAAAAGAAGTTGAAGGAACA  
Rev.of\_GCF\_000832605.1\_ASM83260v1\_genomic.fna\_1:5196965-5197301  
Satlength=337 Nr of Repeats=8 RepeatLength=42 seed=CGGCTCTTTT Num.seqs=8  
Similarity=0.907029 21  
AAAGAAGAAGTAAAAGAGCCGGTAAAAGAAGTTGAAGAAACA  
GCF\_001645555.1\_ASM164555v1\_genomic.fna\_2:16394-16667 Satlength=274 Nr of  
Repeats=8 RepeatLength=42 seed=GAAGTAAAAG Num.seqs=5 Similarity=0.828571  
6 AAAGAAGAAGTAAAAGAGCCAACAAAAGAAGTTGAAGGANCG

\*\*\*\*\* \*\*\*\*\* \*\* \*\*\*\*\* \* \*  
Consensus:

AAAGAAGAAGTaAAAGAgCCggtAAAAGAAGTTGAAGaAaCa

>Bacillus\_Fam\_126\_39\_5 Nr. of seq. 5 Alignment length(with gaps) = 39  
Alignment score = 0.788034  
GCF\_000007825.1\_ASM782v1\_genomic.fna\_1:4664228-4664735 Satlength=508 Nr  
of Repeats=13 RepeatLength=39 seed=TAAGCAACAA Num.seqs=13  
Similarity=0.780769 0  
TAAGCAACAAAGTNCTAAACAAGANGATTCTCTCAGGA  
GCF\_000831065.1\_ASM83106v1\_genomic.fna\_1:4422505-4422934 Satlength=430 Nr  
of Repeats=11 RepeatLength=39 seed=GCTAAACAAG Num.seqs=11  
Similarity=0.854545 13  
TAAGCAACAAAGTGCTAAACAAGATGATTCTNTCTCAAGA  
GCF\_000496285.1\_ASM49628v1\_genomic.fna\_1:1925714-1926104 Satlength=391 Nr  
of Repeats=10 RepeatLength=39 seed=TCTCATGAGA Num.seqs=10  
Similarity=0.889079 31  
GAAACAACAAAATTCTAAACAAGACGATTCTCTCATGA  
Rev.of\_GCF\_000775975.1\_ASM77597v1\_genomic.fna\_1:143645-144191  
Satlength=547 Nr of Repeats=13 RepeatLength=39 seed=TTAGAATTTT

Num.seqs=12 Similarity=0.852370  
18 CAAGCAGCAAAATTCTAAGCAAGATGATTCTTCTCAAAA  
Rev.of\_GCF\_000832605.1\_ASM83260v1\_genomic.fna\_1:1250277-1250745  
Satlength=469 Nr of Repeats=15 RepeatLength=39 seed=CTTGTTTAGA  
Num.seqs=9 Similarity=0.840456  
23 CAAACAGCAAAGTTCTAAACAAGAGGATTCTTCTCAAGA

\*\* \*\* \*\*\*\*\* \* \*\*\*\*\* \*\*\*\*\* \*\*\*\*\* \*

Consensus:

nAAgCAaCAAAGTtCTAAaCAAGAnGATTcNtCTCAagA

>Bacillus\_Fam\_127\_36\_5 Nr. of seq. 5 Alignment length(with gaps) = 36  
Alignment score = 0.792593  
GCF\_000007825.1\_ASM782v1\_genomic.fna\_1:4624379-4625096 Satlength=718 Nr  
of Repeats=5 RepeatLength=36 seed=GTTGCTCTTC Num.seqs=4  
Similarity=0.925926  
0 GTTGCTCTTCTACGACTGGCGCTTCTTCTACAACCTC  
GCF\_000496285.1\_ASM49628v1\_genomic.fna\_1:1885490-1886414 Satlength=925 Nr  
of Repeats=18 RepeatLength=36 seed=TGGTTGTTCT Num.seqs=12  
Similarity=0.956229 34  
GTTGTTCTTCAGCGACTGGCCCTTCTTCTGCAACTG  
GCF\_000007845.1\_ASM784v1\_genomic.fna\_1:4486380-4486794 Satlength=415 Nr  
of Repeats=8 RepeatLength=36 seed=TTGTTCTTCT Num.seqs=5  
Similarity=0.837037  
1 GTTGTTCTTCTACGACCGGTGCTTCTCTGCAACTG  
GCF\_000008505.1\_ASM850v1\_genomic.fna\_1:4481591-4482005 Satlength=415 Nr  
of Repeats=11 RepeatLength=36 seed=TTGTTCTTCT Num.seqs=10  
Similarity=0.853498 1  
GTTGTTCTTCTACGACCGGTGTTTCTCTGCAACTG  
Rev.of\_GCF\_000290995.1\_Baci\_cere\_AND1407\_G13175\_V1\_genomic.fna\_2:176867-  
177083 Satlength=217 Nr of Repeats=7 RepeatLength=36 seed=AGAAGAACAA  
Num.seqs=5 Similarity=0.829630 11  
ATTGTTCTTCTGCGACCGGTGTTTCTTCTACAACCTG

\*\*\* \*\*\*\*\* \*\*\*\*\* \*\* \*\*\* \*\*\* \*\*\*\*\*

Consensus:

gTTGtTCTTCTaCGACcGGtgcTTcTtCTgCAACTg

>Bacillus\_Fam\_128\_36\_5 Nr. of seq. 5 Alignment length(with gaps) = 36  
Alignment score = 0.874074  
GCF\_000007825.1\_ASM782v1\_genomic.fna\_1:4625342-4625852 Satlength=511 Nr  
of Repeats=15 RepeatLength=36 seed=CTTCCACTTC Num.seqs=10  
Similarity=0.893827 0  
CTTCCACTTCTTCTGACTCTTTCGCTTCCGCAATTA  
GCF\_000831065.1\_ASM83106v1\_genomic.fna\_1:4383407-4384004 Satlength=598 Nr  
of Repeats=16 RepeatLength=36 seed=GCAATTACTT Num.seqs=14  
Similarity=0.859178 29  
CTTCNACTTCTTCTGACTCTTCTGCTTCCGCAATTA  
GCF\_000007845.1\_ASM784v1\_genomic.fna\_1:4486994-4487255 Satlength=262 Nr  
of Repeats=7 RepeatLength=36 seed=CTTCTGTTTC Num.seqs=5  
Similarity=0.896296  
18 CTCTACTTCTTCTGACTCTTCTGTTTCTGCAATTA



GCF\_000008505.1\_ASM850v1\_genomic.fna\_1:4482205-4482457 Satlength=253 Nr  
of Repeats=7 RepeatLength=36 seed=CTTCTGTTTC Num.seqs=7  
Similarity=0.890653  
18 CTTCCACTTCTTCTAACTCTTCTGTTTCTGCAATTA  
Rev.of\_GCF\_001645555.1\_ASM164555v1\_genomic.fna\_4:74869-75013  
Satlength=145 Nr of Repeats=4 RepeatLength=36 seed=GAAACAGAAG Num.seqs=4  
Similarity=0.827160 28  
CTTCCACTTCTTCTGGCTCTTCTGTTTCCGCAATTA

\*\*\*\* \*  
Consensus:

CTTCcACTTCTTCTGaCTCTTctGtTTCcGCAATTA

>Bacillus\_Fam\_129\_29\_5 Nr. of seq. 5 Alignment length(with gaps) = 30  
Alignment score = 0.824444  
GCF\_900107275.1\_IMG-  
taxon\_2675903024\_annotated\_assembly\_genomic.fna\_16:61242-61589  
Satlength=348 Nr of Repeats=5 RepeatLength=29 seed=GAGCAGCGGA Num.seqs=3  
Similarity=1.000000 0  
GAGCAGCGGAGCGTACATCACA-CGTACGT  
GCF\_900107275.1\_IMG-  
taxon\_2675903024\_annotated\_assembly\_genomic.fna\_17:131859-132214  
Satlength=356 Nr of Repeats=5 RepeatLength=29 seed=GAGCAGCGGA Num.seqs=3  
Similarity=0.908046 0 GAGCAGCGGAGCGTACAAGGAA-  
CGTACGA  
Rev.of\_GCF\_900107275.1\_IMG-  
taxon\_2675903024\_annotated\_assembly\_genomic.fna\_32:48473-49200  
Satlength=728 Nr of Repeats=5 RepeatLength=29 seed=CTCCGCTGCT Num.seqs=3  
Similarity=1.000000 11 GAGCAGCGGAGCGTACAAGGGA-  
CGTACGT  
GCF\_900107275.1\_IMG-  
taxon\_2675903024\_annotated\_assembly\_genomic.fna\_51:15077-15428  
Satlength=352 Nr of Repeats=5 RepeatLength=29 seed=TGAGCAGCGC Num.seqs=3  
Similarity=0.969349 28  
GAGCAGCGCAGCGTACAAGGGA-CGTACGT  
Rev.of\_GCF\_900107275.1\_IMG-  
taxon\_2675903024\_annotated\_assembly\_genomic.fna\_43:86875-87225  
Satlength=351 Nr of Repeats=5 RepeatLength=30 seed=CTCCGCTGCT Num.seqs=3  
Similarity=0.970370 11  
GAGCAGCGGAGCGTACAAGAGATCGTACGT

\*\*\*\*\* \*  
Consensus:

GAGCAGCGgAGCGTACAaggACGTACGt

>Bacillus\_Fam\_130\_21\_5 Nr. of seq. 5 Alignment length(with gaps) = 24  
Alignment score = 0.626389  
GCF\_000813125.1\_ASM81312v1\_genomic.fna\_65:36039-36144 Satlength=106 Nr of  
Repeats=5 RepeatLength=21 seed=TCGACCACAT Num.seqs=5 Similarity=0.733333  
0 TCGACCACATTCC--AAG-ATAAT  
Rev.of\_GCF\_000813125.1\_ASM81312v1\_genomic.fna\_109:33798-33903  
Satlength=106 Nr of Repeats=5 RepeatLength=21 seed=TGGTCAATT Num.seqs=5

Similarity=0.707937 7  
 TCGACCACATNTC-NAAT--TAAT  
 Rev.of\_GCF\_000813125.1\_ASM81312v1\_genomic.fna\_40:56922-57048  
 Satlength=127 Nr of Repeats=6 RepeatLength=21 seed=ATGTGGTTGA Num.seqs=6  
 Similarity=0.778283 10  
 TCGACCACATTTT-GAANT-TAAT  
 GCF\_001315165.1\_ASM131516v1\_genomic.fna\_25:29879-29963 Satlength=85 Nr of  
 Repeats=4 RepeatLength=21 seed=AATAATTCGA Num.seqs=4 Similarity=0.828283  
 16 TCGACCACATTTTCGAAA--TAAT  
 Rev.of\_GCF\_000813125.1\_ASM81312v1\_genomic.fna\_144:1991-2075 Satlength=85  
 Nr of Repeats=4 RepeatLength=21 seed=TGGTCGAATT Num.seqs=4  
 Similarity=0.756614 7  
 TCGACCAGATTTA-GGAT--TAAT

\*\*\*\*\* \*\* \* \*\*\*\*  
 Consensus:

TCGACCACATttnngaAnTAAT

>Bacillus\_Fam\_131\_24\_5 Nr. of seq. 5 Alignment length(with gaps) = 24  
 Alignment score = 0.822222  
 GCF\_000007845.1\_ASM784v1\_genomic.fna\_1:1480940-1481189 Satlength=250 Nr  
 of Repeats=8 RepeatLength=24 seed=AGCTTCTTCT Num.seqs=5  
 Similarity=0.822667  
 0 AGCTTCTTCTTCAGCTTTTTTTGT  
 GCF\_000008505.1\_ASM850v1\_genomic.fna\_1:1505384-1505633 Satlength=250 Nr  
 of Repeats=8 RepeatLength=24 seed=AGCTTCTTCT Num.seqs=5  
 Similarity=0.822667  
 0 AGCTTCTTCTTCAGCTTTTTTTGT  
 GCF\_000496285.1\_ASM49628v1\_genomic.fna\_1:4094822-4095035 Satlength=214 Nr  
 of Repeats=5 RepeatLength=24 seed=AGCTTCTTCT Num.seqs=3  
 Similarity=0.795556 0  
 AGCTTCTTCTTCAGCTTTTTTTCTT  
 Rev.of\_GCF\_000832605.1\_ASM83260v1\_genomic.fna\_1:4215062-4215365  
 Satlength=304 Nr of Repeats=6 RepeatLength=24 seed=GCTGACGAAG Num.seqs=4  
 Similarity=0.851852 15  
 AGCTTCTTCTGTCAGCTTTTTTTCTT  
 GCF\_000175075.1\_ASM17507v1\_genomic.fna\_2:117151-117274 Satlength=124 Nr  
 of Repeats=5 RepeatLength=24 seed=GCTTCTTTCT Num.seqs=3  
 Similarity=0.925926  
 13 AGCTTGCTCTTCGGCTTCTTTCTT

\*\*\*\*\* \*\* \*\* \*\*\*\*\* \*\* \*  
 Consensus:

AGCTTctTctTCaGCTTtTTTctT

>Bacillus\_Fam\_132\_21\_5 Nr. of seq. 5 Alignment length(with gaps) = 23  
 Alignment score = 0.630435  
 GCF\_000242895.2\_ASM24289v3\_genomic.fna\_1:1703717-1703819 Satlength=103 Nr  
 of Repeats=5 RepeatLength=20 seed=AGTCGAGCAT Num.seqs=3  
 Similarity=0.866667 0  
 AGTCGAGCATA-AAACCT-GAG-

GCF\_000242895.2\_ASM24289v3\_genomic.fna\_1:1503263-1503366 Satlength=104 Nr  
of Repeats=5 RepeatLength=21 seed=AGTCGAGCAT Num.seqs=3  
Similarity=0.808081 0  
AGTCGAGCATA-AACCCT-CAAA  
GCF\_000242895.2\_ASM24289v3\_genomic.fna\_1:1982125-1982248 Satlength=124 Nr  
of Repeats=5 RepeatLength=21 seed=GTCGAGCATA Num.seqs=3  
Similarity=0.690821 1  
AGTCGAGCATANNACCCC-GAA-  
Rev.of\_GCF\_000242895.2\_ASM24289v3\_genomic.fna\_1:4665131-4665236  
Satlength=106 Nr of Repeats=5 RepeatLength=21 seed=TATGCTCGAC Num.seqs=5  
Similarity=0.824242 11  
AGTCGAGCATA-AAT-CTCGAAA  
Rev.of\_GCF\_000242895.2\_ASM24289v3\_genomic.fna\_1:1951392-1951496  
Satlength=105 Nr of Repeats=5 RepeatLength=21 seed=ATATATGCTC Num.seqs=4  
Similarity=0.818182 14  
AGTTGAGCATA-TATCCTCGAAA

\*\*\* \*\*\*\*\* \* \* \*

Consensus:

AGTcGAGCATAaAncCtgAaa

>Bacillus\_Fam\_133\_21\_5 Nr. of seq. 5 Alignment length(with gaps) = 23  
Alignment score = 0.650725  
GCF\_000294775.2\_ASM29477v2\_genomic.fna\_1:5051016-5051119 Satlength=104 Nr  
of Repeats=5 RepeatLength=21 seed=TGCAAATAAA Num.seqs=3  
Similarity=0.440000 0  
TGCAAATAAACNG-GTNGAA-CC  
GCF\_001712755.1\_ASM171275v1\_genomic.fna\_2:340961-341149 Satlength=189 Nr  
of Repeats=9 RepeatLength=21 seed=TGCAAATAAA Num.seqs=8  
Similarity=0.655329  
0 TGCAAATAAAAAAGGTGAAA-C-  
GCF\_001712755.1\_ASM171275v1\_genomic.fna\_37:106859-106987 Satlength=129 Nr  
of Repeats=6 RepeatLength=21 seed=TGCAAATAAA Num.seqs=4  
Similarity=0.513889 0  
TGCAAATAAAAAA-GTGAAATC-  
GCF\_001712755.1\_ASM171275v1\_genomic.fna\_3:168469-168573 Satlength=105 Nr  
of Repeats=4 RepeatLength=21 seed=TGCAAATAAA Num.seqs=3  
Similarity=0.621212  
0 TGCAAATAAAAAATCCTGAAA-C-  
GCF\_001712755.1\_ASM171275v1\_genomic.fna\_5:11567-11647 Satlength=81 Nr of  
Repeats=4 RepeatLength=21 seed=TGCAAATAAA Num.seqs=3 Similarity=0.661616  
0 TGCAAATAAAAAATAGTAAAA-C-

\*\*\*\*\* \* \*\* \*

Consensus:

TGCAAATAAAaanngTgaAAC

>Bacillus\_Fam\_134\_21\_5 Nr. of seq. 5 Alignment length(with gaps) = 23  
Alignment score = 0.628986  
GCF\_000508325.1\_BAVI\_1\_genomic.fna\_121:21154-21237 Satlength=84 Nr of  
Repeats=4 RepeatLength=21 seed=TTTATCAGCG Num.seqs=3 Similarity=0.525253  
0 TTTATCAGCGGATNTN-GNNCT-

GCF\_001591665.1\_ASM159166v1\_genomic.fna\_16:4578-4661 Satlength=84 Nr of Repeats=4 RepeatLength=21 seed=TTTATCAGCG Num.seqs=3 Similarity=0.727273  
0 TTTATCAGCGAATTTC-ACGCT-  
GCF\_001591805.1\_ASM159180v1\_genomic.fna\_23:27706-27789 Satlength=84 Nr of Repeats=4 RepeatLength=21 seed=TTTATCAGCG Num.seqs=3 Similarity=0.727273  
0 TTTATCAGCGAATTTT-ATACT-  
GCF\_000508325.1\_BAVI\_1\_genomic.fna\_64:16791-16874 Satlength=84 Nr of Repeats=4 RepeatLength=21 seed=ATCAGCGAAT Num.seqs=3 Similarity=0.681818  
3 TTTATCAGCGAATTTTGATAGT-  
GCF\_001591805.1\_ASM159180v1\_genomic.fna\_9:281564-281647 Satlength=84 Nr of Repeats=4 RepeatLength=21 seed=TTTATCAGCG Num.seqs=3  
Similarity=0.500000  
0 TTTATCAGCGGAATTC-A-NCTG

\*\*\*\*\* \* \* \*

Consensus:

TTTATCAGCGaAttTnannCT

>Bacillus\_Fam\_135\_21\_5 Nr. of seq. 5 Alignment length(with gaps) = 23  
Alignment score = 0.630435  
GCF\_001889165.1\_ASM188916v1\_genomic.fna\_1:3505433-3505516 Satlength=84 Nr of Repeats=4 RepeatLength=21 seed=TTTATTTTCG Num.seqs=3  
Similarity=0.626263 0  
TTTATTTTCGG-NTTTGAGTCA-  
GCF\_001889165.1\_ASM188916v1\_genomic.fna\_1:3842895-3843000 Satlength=106 Nr of Repeats=4 RepeatLength=21 seed=TTTATTTTCG Num.seqs=3  
Similarity=0.562222 0  
TTTATTTTCGA-ATTTNA-TTNG  
GCF\_001889165.1\_ASM188916v1\_genomic.fna\_1:4154491-4154573 Satlength=83 Nr of Repeats=4 RepeatLength=21 seed=TTTATTTTCG Num.seqs=3  
Similarity=0.671498 0  
TTTATTTTCGA-ATTTGA-TCAT  
GCF\_001889165.1\_ASM188916v1\_genomic.fna\_1:3860025-3860109 Satlength=85 Nr of Repeats=4 RepeatLength=21 seed=TTTATTTTCG Num.seqs=4  
Similarity=0.646465 0  
TTTATTTTCGANATTTCA-TCGN  
Rev.of\_GCF\_002019605.1\_ASM201960v1\_genomic.fna\_1:4136408-4136513  
Satlength=106 Nr of Repeats=4 RepeatLength=21 seed=AAGTTGAAAA Num.seqs=3  
Similarity=1.000000 14  
TTTATTTTCAA-CTTTGC-TCAA

\*\*\*\*\* \*\*\* \*

Consensus:

TTTATTTTCgaaTTTgaTcan

>Bacillus\_Fam\_136\_20\_5 Nr. of seq. 5 Alignment length(with gaps) = 22  
Alignment score = 0.613636  
GCF\_000007845.1\_ASM784v1\_genomic.fna\_1:4468427-4468527 Satlength=101 Nr of Repeats=5 RepeatLength=20 seed=GATATATTTT Num.seqs=5  
Similarity=0.733333  
0 GATAT-ATTTTGATAAT-CGCT

GCF\_000831065.1\_ASM83106v1\_genomic.fna\_1:4854120-4854260 Satlength=141 Nr of Repeats=6 RepeatLength=20 seed=GATATATTTT Num.seqs=5  
 Similarity=0.713333 0  
 GATAT-ATTTTAANAAT-CGCT  
 Rev.of\_GCF\_000008505.1\_ASM850v1\_genomic.fna\_1:4898752-4898852  
 Satlength=101 Nr of Repeats=5 RepeatLength=20 seed=TATATCAGCG Num.seqs=5  
 Similarity=0.636508 6  
 GATAT-ATTTNGGNAAT-CGCT  
 Rev.of\_GCF\_000008505.1\_ASM850v1\_genomic.fna\_1:2760175-2760255  
 Satlength=81 Nr of Repeats=4 RepeatLength=20 seed=TATATCAGCG Num.seqs=4  
 Similarity=0.555556 6  
 GATATATATTAG-AAATNCGCT  
 GCF\_000290995.1\_Baci\_cere\_AND1407\_G13175\_V1\_genomic.fna\_4:613849-613969  
 Satlength=121 Nr of Repeats=5 RepeatLength=20 seed=GATATAATTT Num.seqs=4  
 Similarity=0.687831 22 GATAT-  
 AATTAGAAAATGCGCC

\*\*\*\*\* \*\* \*\*\* \*\*\*  
 Consensus:

GATATatTTnganAATCGct

>Bacillus\_Fam\_137\_20\_5 Nr. of seq. 5 Alignment length(with gaps) = 22  
 Alignment score = 0.633333  
 GCF\_000242895.2\_ASM24289v3\_genomic.fna\_1:4197965-4198045 Satlength=81 Nr of Repeats=4 RepeatLength=20 seed=CCGATATAAT Num.seqs=4  
 Similarity=0.711640  
 0 CCGATATA-ATCGAGATTTTA-  
 Rev.of\_GCF\_000311725.1\_ASM31172v1\_genomic.fna\_2:106659-106759  
 Satlength=101 Nr of Repeats=5 RepeatLength=20 seed=TATATCGGCG Num.seqs=5  
 Similarity=0.552174 8  
 CCGATATA-ATT-AAATTTTCG  
 GCF\_001578185.1\_ASM157818v1\_genomic.fna\_1:4205454-4205534 Satlength=81 Nr of Repeats=4 RepeatLength=20 seed=AGATATAATT Num.seqs=4  
 Similarity=0.822222 21  
 CAGATATA-ATT-CGATTTTCG  
 Rev.of\_GCF\_000311725.1\_ASM31172v1\_genomic.fna\_2:362483-362583  
 Satlength=101 Nr of Repeats=5 RepeatLength=20 seed=TATATCGGCG Num.seqs=3  
 Similarity=0.525253 8  
 CCGATATA-NTC-AGAATATCG  
 GCF\_000311725.1\_ASM31172v1\_genomic.fna\_4:83330-83410 Satlength=81 Nr of Repeats=4 RepeatLength=20 seed=CGCCGATATA Num.seqs=4 Similarity=0.603535  
 19 CCGATATATCTC-AGATTTTCG

\* \* \* \* \*  
 Consensus:

CcGATATAaTcagAtTtTcg

>Bacillus\_Fam\_138\_20\_5 Nr. of seq. 5 Alignment length(with gaps) = 22  
 Alignment score = 0.601515  
 GCF\_000401235.1\_BacNeaAAU1\_genomic.fna\_37:7-109 Satlength=103 Nr of Repeats=5 RepeatLength=20 seed=TATCAGCCAA Num.seqs=3 Similarity=1.000000  
 0 TATC-AGCCAAACTTTCC-ATT

GCF\_001591585.1\_ASM159158v1\_genomic.fna\_21:18-404 Satlength=387 Nr of Repeats=19 RepeatLength=20 seed=TCAGCCAAAC Num.seqs=13 Similarity=0.965812  
 2 TTTC-AGCCAAACTTCAG-ATT  
 GCF\_001591585.1\_ASM159158v1\_genomic.fna\_43:11976-12101 Satlength=126 Nr of Repeats=6 RepeatLength=21 seed=TATCAGCCAA Num.seqs=5 Similarity=0.784127  
 21 TATC-AGCCAAACTTCAGTACT  
 GCF\_000508325.1\_BAVI\_1\_genomic.fna\_156:10891-11119 Satlength=229 Nr of Repeats=7 RepeatLength=21 seed=ATCTCGCCAA Num.seqs=5 Similarity=0.556522  
 1 NATCTCGCCAAACTTNGA-ATT  
 Rev.of\_GCF\_000508325.1\_BAVI\_1\_genomic.fna\_199:5141-5284 Satlength=144 Nr of Repeats=5 RepeatLength=21 seed=TTGGCGAGAT Num.seqs=3 Similarity=0.505050  
 11 TATCTCGCCAAACTTTNA-GTT

\*\* \*\*\*\*\* \*

Consensus:

taTCaGCCAAACTTnnnatT

>Bacillus\_Fam\_139\_21\_5 Nr. of seq. 5 Alignment length(with gaps) = 22  
 Alignment score = 0.645455  
 GCF\_001375535.1\_Bacillus\_niameyensis\_genomic.fna\_6:1986285-1988125  
 Satlength=1841 Nr of Repeats=92 RepeatLength=20 seed=TTCGGATTTT Num.seqs=92 Similarity=1.000000 0  
 TTCG-GATTTTATGAGCGAGA-  
 Rev.of\_GCF\_001375535.1\_Bacillus\_niameyensis\_genomic.fna\_6:3077746-3079526  
 Satlength=1781 Nr of Repeats=89 RepeatLength=20 seed=CTCGCTCATA Num.seqs=89 Similarity=1.000000 19  
 TTCG-GATTTTATGAGCGAGT-  
 Rev.of\_GCF\_001375535.1\_Bacillus\_niameyensis\_genomic.fna\_6:2460775-2461355  
 Satlength=581 Nr of Repeats=28 RepeatLength=20 seed=AGATCTCGCT Num.seqs=25 Similarity=0.779524 2 CT-  
 GTGA-TATATGAGCGAGAT  
 GCF\_001375535.1\_Bacillus\_niameyensis\_genomic.fna\_6:4065733-4066073  
 Satlength=341 Nr of Repeats=17 RepeatLength=20 seed=GATATATGAG Num.seqs=17 Similarity=0.847059 5  
 -TCGTGA-TATATGAGCAAGAA  
 GCF\_001375535.1\_Bacillus\_niameyensis\_genomic.fna\_6:4271828-4272328  
 Satlength=501 Nr of Repeats=25 RepeatLength=20 seed=ATATGAGCGA Num.seqs=25 Similarity=0.836000 8  
 -TCGNGA-TATATGAGCGAGAT

\* \* \* \* \* \*\*\*\*\* \*\*

Consensus:

nTcGnGATaTATGAGCgAGan

>Bacillus\_Fam\_140\_22\_5 Nr. of seq. 5 Alignment length(with gaps) = 22  
 Alignment score = 0.630303  
 GCF\_001315045.1\_ASM131504v1\_genomic.fna\_21:8-820 Satlength=813 Nr of Repeats=5 RepeatLength=21 seed=TTTATTGTCC Num.seqs=4 Similarity=0.530193  
 0 TTTATTGTCC-GATGACCCACA

Rev.of\_GCF\_001315045.1\_ASM131504v1\_genomic.fna\_25:32585-32669  
 Satlength=85 Nr of Repeats=4 RepeatLength=21 seed=GGACAATAAA Num.seqs=4  
 Similarity=0.622475 10  
 TTTATTGTCC-GATTCGCGCCA  
 Rev.of\_GCF\_001315045.1\_ASM131504v1\_genomic.fna\_35:25565-25649  
 Satlength=85 Nr of Repeats=4 RepeatLength=21 seed=GGACAATAAA Num.seqs=4  
 Similarity=0.696970 10  
 TTTATTGTCCAGATGAGCTCCA  
 Rev.of\_GCF\_001315045.1\_ASM131504v1\_genomic.fna\_25:36402-36485  
 Satlength=84 Nr of Repeats=4 RepeatLength=21 seed=GGACAATAAA Num.seqs=3  
 Similarity=0.462963 10  
 TTTATTGTCCNGTT-CGTNACA  
 GCF\_001315045.1\_ASM131504v1\_genomic.fna\_150:1706-1790 Satlength=85 Nr of  
 Repeats=4 RepeatLength=21 seed=TTTATTGTCC Num.seqs=4 Similarity=0.445473  
 21 TTTATTGTCCAGAT-CACAGCA

\*\*\*\*\* \* \* \*\*

Consensus:

TTTATTGTCCnGaTncgcnnCA

>Bacillus\_Fam\_141\_20\_5 Nr. of seq. 5 Alignment length(with gaps) = 21  
 Alignment score = 0.666667  
 GCF\_000311725.1\_ASM31172v1\_genomic.fna\_7:70953-71160 Satlength=208 Nr of  
 Repeats=4 RepeatLength=20 seed=ATCGGTCTAA Num.seqs=3 Similarity=0.644444  
 0 ATCGGTCTAAT-TTCAAATAT  
 GCF\_900156875.1\_PRJEB18969\_genomic.fna\_10:321051-321132 Satlength=82 Nr  
 of Repeats=4 RepeatLength=20 seed=TATATCGGTC Num.seqs=3  
 Similarity=0.671958  
 17 ATCGGTCTCAGAT-TTNNAATAT  
 GCF\_002019645.1\_ASM201964v1\_genomic.fna\_1:898029-898267 Satlength=239 Nr  
 of Repeats=12 RepeatLength=20 seed=TATCGGTCTA Num.seqs=8  
 Similarity=0.771429 19  
 ATCGGTCTAAC-TAGAAAAAT  
 GCF\_002019645.1\_ASM201964v1\_genomic.fna\_1:1325761-1326158 Satlength=398  
 Nr of Repeats=20 RepeatLength=20 seed=TATCGGTCTA Num.seqs=17  
 Similarity=0.704482 19  
 ATCGGTCTAAC-TCAAGATAT  
 GCF\_002019645.1\_ASM201964v1\_genomic.fna\_1:1553541-1553821 Satlength=281  
 Nr of Repeats=13 RepeatLength=20 seed=TATCGGTCTA Num.seqs=12  
 Similarity=0.763348 19  
 ATCGGTCTAACTTTAAGATAT

\*\*\*\*\* \* \* \* \*\*

Consensus:

ATCGGTCTaAcTtnaaAtAT

>Bacillus\_Fam\_142\_20\_5 Nr. of seq. 5 Alignment length(with gaps) = 20  
 Alignment score = 0.746667  
 GCF\_001375535.1\_Bacillus\_niameyensis\_genomic.fna\_6:224994-228602  
 Satlength=3609 Nr of Repeats=180 RepeatLength=20 seed=TTTCTCTATC  
 Num.seqs=179 Similarity=0.998519 0  
 TTTCTCTATCCAAGAGTATT

GCF\_001375535.1\_Bacillus\_niameyensis\_genomic.fna\_6:1933173-1933473  
 Satlength=301 Nr of Repeats=15 RepeatLength=20 seed=ATACGAGAGT  
 Num.seqs=15 Similarity=0.818292 7  
 CCTCGCTATACGAGAGTATC  
 GCF\_001375535.1\_Bacillus\_niameyensis\_genomic.fna\_6:2574155-2574275  
 Satlength=121 Nr of Repeats=6 RepeatLength=20 seed=GAGAGTATTT Num.seqs=6  
 Similarity=0.853333 11  
 TCACGCTATACGAGAGTATT  
 GCF\_001375535.1\_Bacillus\_niameyensis\_genomic.fna\_6:3800918-3801078  
 Satlength=161 Nr of Repeats=7 RepeatLength=20 seed=GAGAGTATTT Num.seqs=6  
 Similarity=0.675556 11  
 TCGCGCTATACGAGAGTATT  
 GCF\_001375535.1\_Bacillus\_niameyensis\_genomic.fna\_6:2578467-2578567  
 Satlength=101 Nr of Repeats=5 RepeatLength=20 seed=GAGAGTATTT Num.seqs=5  
 Similarity=0.726667 11  
 TCTCGCTATGTGAGAGTATT

\* \*\*\*\* \* \*

Consensus:

tctCgCTATacgAGAGTATt

>Bacillus\_Fam\_143\_20\_5 Nr. of seq. 5 Alignment length(with gaps) = 20  
 Alignment score = 0.686667  
 GCF\_001591645.1\_ASM159164v1\_genomic.fna\_5:153867-154047 Satlength=181 Nr  
 of Repeats=9 RepeatLength=20 seed=CGCAAATAAA Num.seqs=7  
 Similarity=0.746032  
 0 CGCAAATAAATTCTCAGGAT  
 GCF\_001712755.1\_ASM171275v1\_genomic.fna\_5:39192-39789 Satlength=598 Nr of  
 Repeats=27 RepeatLength=20 seed=GCAAATAAAA Num.seqs=22  
 Similarity=0.724675  
 1 GGCAAATAAAATCNTGGAAT  
 Rev.of\_GCF\_001712755.1\_ASM171275v1\_genomic.fna\_35:198476-198815  
 Satlength=340 Nr of Repeats=17 RepeatLength=20 seed=TTTTATTTGC  
 Num.seqs=16 Similarity=0.675694  
 11 CGCAAATAAAATTTGGAAT  
 GCF\_001712755.1\_ASM171275v1\_genomic.fna\_37:245563-245843 Satlength=281 Nr  
 of Repeats=11 RepeatLength=20 seed=ATCGCAAATA Num.seqs=9  
 Similarity=0.706349 18  
 CGCAAATAAAACTGGAAT  
 GCF\_001712755.1\_ASM171275v1\_genomic.fna\_10:18587-18827 Satlength=241 Nr  
 of Repeats=11 RepeatLength=20 seed=GAATCGCAAA Num.seqs=10  
 Similarity=0.716755 16  
 CGCAAATAAAANGCCGAAT

\*\*\*\*\* \* \*

Consensus:

cGCAAATAAAanctngGaAT

>Bacillus\_Fam\_144\_18\_5 Nr. of seq. 5 Alignment length(with gaps) = 18  
 Alignment score = 0.718518  
 GCF\_000290995.1\_Baci\_cere\_AND1407\_G13175\_V1\_genomic.fna\_1:1402612-1402892  
 Satlength=281 Nr of Repeats=11 RepeatLength=18 seed=GGAGCAACAG



Num.seqs=7 Similarity=0.816579 0  
GGAGCAACAGGCCCAACA  
GCF\_900156865.1\_PRJEB18960\_genomic.fna\_3:459675-459846 Satlength=172 Nr  
of Repeats=10 RepeatLength=18 seed=GGCCCAACAG Num.seqs=8  
Similarity=0.896825  
9 GGTCCAACAGGCCCAACA  
GCF\_000408885.1\_ASM40888v1\_genomic.fna\_1:903316-904711 Satlength=1396 Nr  
of Repeats=62 RepeatLength=18 seed=GGAGCAACCG Num.seqs=39  
Similarity=0.802069 0  
GGAGCAACCGNCCGACA  
GCF\_000712615.1\_ASM71261v1\_genomic.fna\_9:136496-136568 Satlength=73 Nr of  
Repeats=4 RepeatLength=18 seed=GGAGAAACCG Num.seqs=4 Similarity=0.913580  
0 GGAGAAACCGGCCCAACG  
Rev.of\_GCF\_900096965.1\_IMG-  
taxon\_2671180223\_annotated\_assembly\_genomic.fna\_5:86873-87080  
Satlength=208 Nr of Repeats=9 RepeatLength=18 seed=CACCCGTTGG Num.seqs=6  
Similarity=0.935802 4 GGTGTAACGGGCCCAACG

\*\* \*\*\* \*\* \*\* \*\*

Consensus:

GGagcAACnGGcCCaACa

>Bacillus\_Fam\_145\_12\_5 Nr. of seq. 5 Alignment length(with gaps) = 12  
Alignment score = 0.811111  
GCF\_000153365.1\_ASM15336v1\_genomic.fna\_16:276957-277038 Satlength=82 Nr  
of Repeats=6 RepeatLength=12 seed=GAAGACGAAG Num.seqs=4  
Similarity=0.851852  
0 GAAGACGAAGAT  
GCF\_000153365.1\_ASM15336v1\_genomic.fna\_16:276984-277131 Satlength=148 Nr  
of Repeats=12 RepeatLength=12 seed=GAAGATGAAG Num.seqs=9  
Similarity=0.833333 0  
GAAGATGAAGAT  
Rev.of\_GCF\_000473245.1\_ASM47324v1\_genomic.fna\_1:2532988-2533135  
Satlength=148 Nr of Repeats=11 RepeatLength=12 seed=TCTTCATCTT  
Num.seqs=7 Similarity=0.830688  
5 GAAGATGAAGAT  
GCF\_000299035.1\_ASM29903v1\_genomic.fna\_1:1278771-1279065 Satlength=295 Nr  
of Repeats=21 RepeatLength=12 seed=GAAGATGAAG Num.seqs=16  
Similarity=0.892593 0  
GAAGAAGAAGAA  
Rev.of\_GCF\_000956595.1\_ASM95659v1\_genomic.fna\_52:22021-22282  
Satlength=262 Nr of Repeats=21 RepeatLength=12 seed=TCTTCCTCTT  
Num.seqs=13 Similarity=0.931624  
2 GAAGAAGANGAA

\*\*\*\*\* \*\* \*\*

Consensus:

GAAGAnGAaGAt

>Bacillus\_Fam\_146\_52\_4 Nr. of seq. 4 Alignment length(with gaps) = 58  
Alignment score = 0.652778

GCF\_000186145.1\_Bacillus\_sp\_2\_A\_57\_CT2\_V1\_genomic.fna\_6:238667-238927  
 Satlength=261 Nr of Repeats=5 RepeatLength=52 seed=GTTCGGACTG Num.seqs=5  
 Similarity=0.796226 18  
 TGTCCGAAGTTGCATC-AG--GTTCGGACT-GCT-CTGA-ACGGGTTTCCTCTTCTCC  
 Rev.of\_GCF\_000294775.2\_ASM29477v2\_genomic.fna\_1:859052-859364  
 Satlength=313 Nr of Repeats=6 RepeatLength=52 seed=ACTTCGGACA Num.seqs=6  
 Similarity=0.783857 62  
 TGTCCGAAGTTGCATCTAG--GTTCGGACT-GCT-CTGA-ACGGGTTTCCTCTTCTCC  
 GCF\_000186145.1\_Bacillus\_sp\_2\_A\_57\_CT2\_V1\_genomic.fna\_14:48997-49307  
 Satlength=311 Nr of Repeats=6 RepeatLength=52 seed=GTTCGGACTC Num.seqs=5  
 Similarity=0.762963 18  
 TGTCCGAAGTTGCACC-GG--GTTCGGACTCTCTCCTG---CGGATTTCTTCTTCTCC  
 Rev.of\_GCF\_000294775.2\_ASM29477v2\_genomic.fna\_1:477876-478136  
 Satlength=261 Nr of Repeats=5 RepeatLength=52 seed=GTGAGTCCGA Num.seqs=5  
 Similarity=0.866667 29  
 TGTCCGAATAAGCA-C-TGTG-TTCGGACT--CA-CCAAC TCGGTTTTCTTCTTCTCC

\*\*\*\*\* \* \* \*\*\* \*\*\*\* \*\*\*\*\* \*\*\* \* \*  
 Consensus:

gTTCGGACTgCtCtgaacGGgTTTctTCTTCTCCTGTCCGAagtGCAAtCaG

>Bacillus\_Fam\_147\_54\_4 Nr. of seq. 4 Alignment length(with gaps) = 57  
 Alignment score = 0.632554  
 GCF\_000401235.1\_BacNeaAAU1\_genomic.fna\_155:14912-15172 Satlength=261 Nr  
 of Repeats=5 RepeatLength=52 seed=TTCATCCACT Num.seqs=5  
 Similarity=0.791195  
 0 TTCATCCACTCGATGAACACCACTTTTCTCCT--G-CTTCCTCTACTT--TTTGGTG  
 GCF\_001591585.1\_ASM159158v1\_genomic.fna\_2:273831-274142 Satlength=312 Nr  
 of Repeats=6 RepeatLength=52 seed=CACTTTTCCT Num.seqs=5  
 Similarity=0.886792  
 20 TTCATCCCTTTGATGAAAACCACTTTT--CCT--G-CTTCTTCTGGTTATTTTGGTG  
 Rev.of\_GCF\_001591585.1\_ASM159158v1\_genomic.fna\_18:26242-26552  
 Satlength=311 Nr of Repeats=6 RepeatLength=52 seed=TGGTGTTCAT Num.seqs=5  
 Similarity=0.784615 22  
 TTCATCCGCTTGATGAACACCACTTTT-TCCTCNGCCTTC--CTGGAT--TGTGGTT  
 Rev.of\_GCF\_001591585.1\_ASM159158v1\_genomic.fna\_18:28113-28373  
 Satlength=261 Nr of Repeats=5 RepeatLength=52 seed=GTTCATCAAG Num.seqs=5  
 Similarity=0.817949 70  
 TTCATTTGCTTGATGAACACCATTTTT-TCCTCGGTCTTC--CTGGAT--TGTGGTG

\*\*\*\*\* \* \*\*\*\*\* \*\*\*\* \*\*\*\* \* \* \* \* \*  
 Consensus:

TTCATccgcTtGATGAACACCAcTTTTtCCTcnGnCTTCntCTggaTTgTGGTg

>Bacillus\_Fam\_148\_52\_4 Nr. of seq. 4 Alignment length(with gaps) = 57  
 Alignment score = 0.626218  
 GCF\_000759675.1\_ASM75967v1\_genomic.fna\_13:55319-55837 Satlength=519 Nr of  
 Repeats=10 RepeatLength=52 seed=GCTCTTGGTG Num.seqs=8  
 Similarity=0.807952  
 0 GCTCTTGGTGACCGATA-TCCAAGGGAA-ATCG-AA-ATTGTGGTCACCAAGG-AGT  
 Rev.of\_GCF\_000759675.1\_ASM75967v1\_genomic.fna\_151:356127-356582  
 Satlength=456 Nr of Repeats=4 RepeatLength=52 seed=GATTTTCCTT Num.seqs=3

Similarity=0.914530 30  
 GCTCTTGGTGACCGAAA-TCAAAGGAAA-ATCG-AA-AAAGTGGTAACCAAGA-AGG  
 Rev.of\_GCF\_000759675.1\_ASM75967v1\_genomic.fna\_164:44908-45116  
 Satlength=209 Nr of Repeats=4 RepeatLength=52 seed=GTCATCAAGA Num.seqs=4  
 Similarity=0.854701 12  
 GCTCTTGATGACCGAAA-TCC--GGAAA-AAAGTAAGAAAGTGGTTACCAAGA-AGG  
 Rev.of\_GCF\_000759675.1\_ASM75967v1\_genomic.fna\_57:123377-123693  
 Satlength=317 Nr of Repeats=6 RepeatLength=53 seed=ATTGGTTACC Num.seqs=4  
 Similarity=0.890985 48 -  
 CTATTGGTGACCGAAACAGCAAGGGAAGATAG--A-AAAGTGGTAACCAATAGAGG

\*\*\* \*\* \* \* \* \* \* \* \*

Consensus:

gCTcTTGgTGACCGAaAtccaaGGaAAAtaGaAAaaGTGGTaACCAAGaAGg

>Bacillus\_Fam\_149\_53\_4 Nr. of seq. 4 Alignment length(with gaps) = 57  
 Alignment score = 0.627680  
 GCF\_002019645.1\_ASM201964v1\_genomic.fna\_1:1958292-1959384 Satlength=1093  
 Nr of Repeats=21 RepeatLength=52 seed=GACAGCTTTG Num.seqs=21  
 Similarity=0.736162 48  
 GCTTTGGCT-ATATCAACA-A-GAAAGCTGTCCGAACCT-AGG-TAGACTTCGGACA  
 GCF\_002019645.1\_ASM201964v1\_genomic.fna\_1:1960889-1961149 Satlength=261  
 Nr of Repeats=5 RepeatLength=52 seed=AAGCTGTCCG Num.seqs=5  
 Similarity=0.846541 73  
 GCTTTGGCT-ANATCAACA-A-GAAAGCTGTCCGAACCT-AGG-TAGACTTCGGACA  
 Rev.of\_GCF\_002019645.1\_ASM201964v1\_genomic.fna\_1:5249431-5249898  
 Satlength=468 Nr of Repeats=9 RepeatLength=52 seed=CTGTTCAGAC Num.seqs=8  
 Similarity=0.826923 88  
 GCTTTAGCT-AGA--AAAAGAGGGAAGCTGTCTGAACAG-AGCGCA-ACTTCGGACA  
 GCF\_002019645.1\_ASM201964v1\_genomic.fna\_1:5267087-5267710 Satlength=624  
 Nr of Repeats=11 RepeatLength=52 seed=ACTTCGGACA Num.seqs=10  
 Similarity=0.699802 94  
 GCTTCAGCNCTCA--AACAGA-GAAAGCTGTCCGAACACAAGC-CA-ACTTCGGACA

\*\*\*\*\* \*\* \* \* \* \* \* \* \*

Consensus:

GACAGCTTtaGCTanAtcAAcAgAGaAAGCTGTCCGAACatAGccAgACTTCG

>Bacillus\_Fam\_150\_53\_4 Nr. of seq. 4 Alignment length(with gaps) = 56  
 Alignment score = 0.619048  
 GCF\_000294775.2\_ASM29477v2\_genomic.fna\_1:4687252-4687712 Satlength=461 Nr  
 of Repeats=9 RepeatLength=51 seed=GATTAACCTAC Num.seqs=8  
 Similarity=0.729654 39  
 TTTT--TCTT--TGACCCCTT-ATTTTCGGCGTTAATCCCTCCGATTAACCTACCA  
 GCF\_000186145.1\_Bacillus\_sp\_2\_A\_57\_CT2\_V1\_genomic.fna\_3:854190-854829  
 Satlength=640 Nr of Repeats=12 RepeatLength=52 seed=ATTAACCTCCC  
 Num.seqs=9 Similarity=0.824074 40  
 TTTTC-TCTT-GAGCA--CCTTCATTTTGGGCGTTATTCCCACTGATTAACCTCCA  
 Rev.of\_GCF\_000186145.1\_Bacillus\_sp\_2\_A\_57\_CT2\_V1\_genomic.fna\_5:200856-  
 201375 Satlength=520 Nr of Repeats=10 RepeatLength=52 seed=GACGAAATTG  
 Num.seqs=9 Similarity=0.878205 79  
 TTTTCGCCCTTACTCCA---CTC-AATTTTCGTCGTTATTCCATGTGATTAACCTACCA

GCF\_000294775.2\_ASM29477v2\_genomic.fna\_1:2711828-2712087 Satlength=260 Nr  
of Repeats=5 RepeatLength=52 seed=ATTAACTACC Num.seqs=4  
Similarity=0.772013 92  
TTTTCGCCTTACTCCA---CTC-AATTTTCGTCGTAAATCCATGTGATTA ACTACCA

\*\*\*\*\*  
Consensus:

GATTAAC TaCCATTTTcg cCTTactcCAcCTcAaTTTcGgCGTtAaTCCatct

>Bacillus\_Fam\_151\_52\_4 Nr. of seq. 4 Alignment length(with gaps) = 56  
Alignment score = 0.669643  
GCF\_000169195.2\_ASM16919v2\_genomic.fna\_1:485549-485757 Satlength=209 Nr  
of Repeats=4 RepeatLength=52 seed=TTATGAAGGA Num.seqs=4  
Similarity=0.794872  
0 TTATGAAGGACATTTTCAGACT--GCGG--TTTGCACCCCTTTGTCCTTCATCCCGC  
GCF\_000169195.2\_ASM16919v2\_genomic.fna\_1:2293568-2294088 Satlength=521 Nr  
of Repeats=10 RepeatLength=52 seed=TTTGTCTTC Num.seqs=10  
Similarity=0.789937 35  
TTATGAAGGACATTTTCAGCTT--GCGG--TTCGTCCCCTTTGTCCTTCATCCCGT  
Rev.of\_GCF\_000832905.1\_ASM83290v1\_genomic.fna\_1:2365732-2366096  
Satlength=365 Nr of Repeats=7 RepeatLength=52 seed=CGGGATGAAG Num.seqs=7  
Similarity=0.912088 51  
TTATGAAGGACATTTCAACCT--GCAG--CTCGCNACCTTTTGTCTTCATCCCGC  
Rev.of\_GCF\_001591485.1\_ASM159148v1\_genomic.fna\_169:2077-2544  
Satlength=468 Nr of Repeats=9 RepeatLength=52 seed=ATGAAGGACA Num.seqs=6  
Similarity=0.583236 47  
TTATGAAGGACAATTC---TTGNGCGGCNTTCATAA-CATTTGTCTTCATCCGGC

\*\*\*\*\*  
Consensus:

TTATGAAGGACATTTcagccTGCgGtTcgcaacCtTTTGTCTTCATCCcGc

>Bacillus\_Fam\_152\_53\_4 Nr. of seq. 4 Alignment length(with gaps) = 56  
Alignment score = 0.633929  
GCF\_000177235.2\_ASM17723v2\_genomic.fna\_1:299755-299963 Satlength=209 Nr  
of Repeats=4 RepeatLength=52 seed=CTGAAGGTCA Num.seqs=4  
Similarity=0.867521  
0 CTGAAGGTCATCATA-GAAGCG-CAATGCTTACCGAGAAAACAAGA-AGAAG-CAC  
GCF\_000177235.2\_ASM17723v2\_genomic.fna\_1:1015273-1015845 Satlength=573 Nr  
of Repeats=11 RepeatLength=52 seed=AAAGCAGAAA Num.seqs=11  
Similarity=0.933800 34  
-TGAAGGTCATCATACG-AG-GTCAATGCTACCCGAAAAAGCAGAAAAAATG-TTC  
Rev.of\_GCF\_000177235.2\_ASM17723v2\_genomic.fna\_1:4124120-4124692  
Satlength=573 Nr of Repeats=10 RepeatLength=52 seed=CTTTCTCGGG  
Num.seqs=9 Similarity=0.791495  
38 -TGAAGGTCATCATACGAAG-G-CAATGCTACCCGAGAAAGTAAACTGAAG-CGN  
Rev.of\_GCF\_000177235.2\_ASM17723v2\_genomic.fna\_1:4072932-4073556  
Satlength=625 Nr of Repeats=12 RepeatLength=52 seed=GTATGATGAC  
Num.seqs=12 Similarity=0.743874  
67 --GACGGTCATCATACGAAG-GNCAATGCTGCCCGAGAAATCAAACTGAAGTCGC

\*\* \*\*\*\*\* \* \*\* \* \*\*\*\*\* \*\*\*\*\* \* \* \* \*

tGAaGGTCATCATAcGaAGGnCAATGCTacCCGAgAAAgcAaaAcagAaGcgc

\* \* \* \* \*

Consensus:

\*\*\*\*\* \* \* \*\* \*\* \*\* \* \*\*\*\*\* \*\*\*\*\*  
Consensus:

```
>Bacillus_Fam_155_54_4 Nr. of seq. 4 Alignment length(with gaps) = 56
Alignment score = 0.630952
```

GCF\_001636325.1\_ASM163632v1\_genomic.fna\_1:1582614-1583134 Satlength=521  
Nr of Repeats=10 RepeatLength=52 seed=CCTGAAACAC Num.seqs=10  
Similarity=0.912251 0  
CCTGAAACACTCTGCGATCAC-TC-T-CTTCAGAGGAATAAAT-CATCTTTATTCA  
Rev.of\_GCF\_001636325.1\_ASM163632v1\_genomic.fna\_2:51162-51682  
Satlength=521 Nr of Repeats=10 RepeatLength=52 seed=GAATAAAGAT  
Num.seqs=10 Similarity=0.944729  
51 CCTGAAACACTCTGCAATCAC-TC-T-CTTCAGAGGAATAAAT-CATCTTTATTCA  
GCF\_001636325.1\_ASM163632v1\_genomic.fna\_1:2294800-2295110 Satlength=311  
Nr of Repeats=6 RepeatLength=52 seed=TTACCTGAA Num.seqs=4  
Similarity=0.858974 48  
CCTGAAGCGC--TCCGAT-TCTTCTTCCTTCAGGTGAATAAACGCA-CTTTATTCA  
Rev.of\_GCF\_001636325.1\_ASM163632v1\_genomic.fna\_3:1067228-1067852  
Satlength=625 Nr of Repeats=12 RepeatLength=52 seed=GAAGCAGAGA  
Num.seqs=12 Similarity=0.882673  
80 CCTGAAGCGCTTTCTTAT-TC-TC-TGCTTCAGAGGAATAAATGCG-CGTTATCCA

\*\*\*\*\* \* \* \* \*\* \* \*\* \* \*\*\*\*\* \*\*\*\*\* \* \* \*\*\*\* \*\*  
Consensus:

CCTGAAaCaCtcTccgAtcaCTCTnCTTCAGagGAATAAAtgCatCtTTATtCA

>Bacillus\_Fam\_156\_51\_4 Nr. of seq. 4 Alignment length(with gaps) = 55  
Alignment score = 0.623232  
GCF\_000292245.2\_ASM29224v2\_genomic.fna\_2:106784-107395 Satlength=612 Nr  
of Repeats=12 RepeatLength=51 seed=ATTGGTAATG Num.seqs=11  
Similarity=0.743396 0  
-ATTGGTAATGNAATT-TTCGCTTTC--CTCCGTTTTCGGTGCGTATTACTCTGA  
GCF\_000292245.2\_ASM29224v2\_genomic.fna\_60:13365-13773 Satlength=409 Nr of  
Repeats=8 RepeatLength=51 seed=CGGTGCGTAT Num.seqs=8 Similarity=0.820728  
33 -ATTGGTAATGTAATT-TTCACTTTC-TCT-CTTTTACGGTGCGTATTATCCNCA  
Rev.of\_GCF\_000292245.2\_ASM29224v2\_genomic.fna\_57:11835-12090  
Satlength=256 Nr of Repeats=5 RepeatLength=51 seed=CATTACCAAT Num.seqs=5  
Similarity=0.562346 10  
-ATTGGTAATGNANAT-TTCGNGTTCNTCT--TTTTACGGTGCGTATTAACCTGGA  
GCF\_000292245.2\_ASM29224v2\_genomic.fna\_35:28784-28988 Satlength=205 Nr of  
Repeats=4 RepeatLength=51 seed=TAATGAAAAT Num.seqs=4 Similarity=0.925926  
6 TATTCGTAATGAAAATCCTGAC-TTC-TCT-CTTTTACGGTGCGTATTATCCTT-

\*\*\* \*\*\*\*\* \* \* \* \*\*\* \*\* \*\*\* \*\*\*\*\*  
Consensus:

ATTgGTAATGnAaaTtTcactTTCTtCTctTTTaCGGTGCGTATTAtcctga

>Bacillus\_Fam\_157\_53\_4 Nr. of seq. 4 Alignment length(with gaps) = 55  
Alignment score = 0.639899  
GCF\_000292245.2\_ASM29224v2\_genomic.fna\_33:5368-5572 Satlength=205 Nr of  
Repeats=4 RepeatLength=51 seed=CTTTTTTCGC Num.seqs=4 Similarity=0.864924  
47 TTTCGCTCCCTAATTT--CTGCGATCCTCGATTCTCATTACCTATCAC-GCT-TT  
GCF\_000292245.2\_ASM29224v2\_genomic.fna\_61:11632-11836 Satlength=205 Nr of  
Repeats=4 RepeatLength=51 seed=TTTTTCATTAC Num.seqs=4 Similarity=0.895425  
80 TTTCGCACCCTTATTT--CTGCAAGCCGCGATTTTCATTACCTATCAC-A-TGCT

GCF\_000292245.2\_ASM29224v2\_genomic.fna\_58:26892-27198 Satlength=307 Nr of Repeats=6 RepeatLength=51 seed=CAATTTTCAT Num.seqs=6 Similarity=0.919017  
77 ATTCGCACCCTAATTTGGCTTC-A-CCTCAATTTTCATTACCAATCAC-GCT-TT  
GCF\_000292245.2\_ASM29224v2\_genomic.fna\_94:1889-2195 Satlength=307 Nr of Repeats=6 RepeatLength=51 seed=ATTTTCATTA Num.seqs=6 Similarity=0.748428  
79 ATTCGCACCCTAATTTGACTAC-ATACACCATTTTCATTACCTATCACAGC--TN

\*\*\*\*\* \* \* \* \* \* \* \* \* \* \* \* \* \* \* \*

Consensus:

ctttaTTCGCaCCCTaATTTGnCTgCnAtcCtCgATTtTCATTACctATCACg

>Bacillus\_Fam\_158\_51\_4 Nr. of seq. 4 Alignment length(with gaps) = 55  
Alignment score = 0.638384  
GCF\_000186145.1\_Bacillus\_sp\_2\_A\_57\_CT2\_V1\_genomic.fna\_5:259376-259584  
Satlength=209 Nr of Repeats=4 RepeatLength=52 seed=AGTCCGAACC Num.seqs=4  
Similarity=0.789308 0  
AGTCCGAACCTGCCACGACTTCGGACAGA-AA-AAGGAGAAAAT-CCCTTGCCAG  
Rev.of\_GCF\_000294775.2\_ASM29477v2\_genomic.fna\_1:2652246-2652610  
Satlength=365 Nr of Repeats=7 RepeatLength=52 seed=CTGTCCGAAG Num.seqs=5  
Similarity=0.871795 28  
AGTCCGAACCTGCCACGACTTCGGACAGT-AA-AAGGA-AAAATCCCCGTGCCAG  
Rev.of\_GCF\_000294775.2\_ASM29477v2\_genomic.fna\_1:2731628-2731940  
Satlength=313 Nr of Repeats=6 RepeatLength=52 seed=TTCTCTGTCC Num.seqs=6  
Similarity=0.847863 32  
AGTCCGAACCTGGGCAACTTCGGACAGAGAA-ATCGA-AAAAC-CCGGTGTGAG  
Rev.of\_GCF\_001591465.1\_ASM159146v1\_genomic.fna\_7:42047-42307  
Satlength=261 Nr of Repeats=5 RepeatLength=52 seed=TTCCGACTCT Num.seqs=5  
Similarity=0.720606 61  
AGTCCGAACCNGGNTCAACTTCTGACACA-ACCAGCGA-AAAAA-CCGGAGTCAG

\*\*\*\*\* \* \* \* \* \* \* \* \* \* \* \* \* \* \* \*

Consensus:

AGTCCGAACctGccaCaACTTCgGACAgAaAacGAAAAAtCCcgtGccAG

>Bacillus\_Fam\_159\_52\_4 Nr. of seq. 4 Alignment length(with gaps) = 55  
Alignment score = 0.621212  
GCF\_000331575.1\_ASM33157v1\_genomic.fna\_1:1399302-1400446 Satlength=1145  
Nr of Repeats=22 RepeatLength=52 seed=GTTCGGACAC Num.seqs=22  
Similarity=0.894416 0  
GTTCGGACACAATTT--TGC-TACTACGGCCGTTTTCTGTCCGAACCTACCACCAA  
GCF\_000331575.1\_ASM33157v1\_genomic.fna\_1:1688744-1689472 Satlength=729 Nr  
of Repeats=14 RepeatLength=52 seed=TTCTGTGCCG Num.seqs=14  
Similarity=0.876021 30  
GTTCGGACTCGATTT--CGC-TTCTNCGGCCTTTTTCTGTCCGAATTCGCACCTA  
Rev.of\_GCF\_000331575.1\_ASM33157v1\_genomic.fna\_3:122725-123817  
Satlength=1093 Nr of Repeats=21 RepeatLength=52 seed=GTCCGAACCTA  
Num.seqs=21 Similarity=0.898291  
59 GTTCGGACTCGATTT--CGCTTTCTTCTACCTT-TTCTGTCCGAACCTACCCCTA  
GCF\_000331575.1\_ASM33157v1\_genomic.fna\_1:1781562-1782030 Satlength=469 Nr  
of Repeats=9 RepeatLength=52 seed=TCCTGTCCGA Num.seqs=9  
Similarity=0.876068 31  
GTTCGGACACCATTTGGTGC-TTATGCTAAAAT--CCTGTCCGAACCTACCACCAA

\*\*\*\*\* \* \*\*\*\* \*\* \* \* \* \* \*\*\*\*\* \* \* \*\* \*

Consensus:

GTTCGGACaCgATTTcGCTtcTnCgacctTtttCTGTCCGAACtacCaCCaA

>Bacillus\_Fam\_160\_52\_4 Nr. of seq. 4 Alignment length(with gaps) = 55

Alignment score = 0.711616

GCF\_000708755.2\_ASM70875v2\_genomic.fna\_2:551545-552118 Satlength=574 Nr

of Repeats=11 RepeatLength=52 seed=GATAAGTGCC Num.seqs=10

Similarity=0.772080

0

GATAAGTGCCACCAAGAACAGAGATTNCAGTT-TTGATGGTTCCTTTC-TG-CTG

GCF\_000708755.2\_ASM70875v2\_genomic.fna\_2:805597-805857 Satlength=261 Nr

of Repeats=5 RepeatLength=52 seed=AGAGATTCCCT Num.seqs=5

Similarity=0.874359

18 -ATAAGTGCCATCAACAACAGAGATTCTGGT-TTGGTGGTTCCTTTC-TGCCTG

GCF\_000709935.2\_ASM70993v2\_genomic.fna\_4:61155-61415 Satlength=261 Nr of

Repeats=5 RepeatLength=52 seed=AGAGATTCCCT Num.seqs=5 Similarity=0.874359

18 -ATAAGTGCCATCAACAACAGAGATTCTGGT-TTGGTGGTTCCTTTC-TGCCTG

GCF\_000708755.2\_ASM70875v2\_genomic.fna\_6:56917-57385 Satlength=469 Nr of

Repeats=9 RepeatLength=52 seed=TGGTTCTTAT Num.seqs=9 Similarity=0.820130

35 -TTAAGTGCCATCAAGCAC-NAGATTTCTNCTGTTGGTGGTTCCTTATCACG-CTG

\*\*\*\*\* \*\*\* \*\* \*\*\*\*\* \* \* \*\*\* \*\*\*\*\* \* \*\* \* \*\*\*

Consensus:

aTAAGTGCCAtCAAcACagAGATTcCtggTTTGgTGGTTCcTtTcTcGcCTG

>Bacillus\_Fam\_161\_52\_4 Nr. of seq. 4 Alignment length(with gaps) = 55

Alignment score = 0.627778

GCF\_000752395.1\_Bacillus\_andreraoultii\_genomic.fna\_17:112081-112497

Satlength=417 Nr of Repeats=8 RepeatLength=52 seed=CTCAAGTTTT Num.seqs=8

Similarity=0.883700

0

CTCAAG-

TTTTCGCAAAATCNGGCTCATAGAACACTT-CTATGAACCCAAAATC-

GCF\_000752395.1\_Bacillus\_andreraoultii\_genomic.fna\_24:70990-71406

Satlength=417 Nr of Repeats=8 RepeatLength=52 seed=GTTTACGCGA Num.seqs=8

Similarity=0.815934

5

CTGAAG-TTTACGCGAAAACGGGCGCATACAAC-CTTCCTATAAGCCCAAAATT-

GCF\_000752395.1\_Bacillus\_andreraoultii\_genomic.fna\_24:160764-161336

Satlength=573 Nr of Repeats=10 RepeatLength=52 seed=TCTATGAACC

Num.seqs=9 Similarity=0.789832

35

CTNAGG-TTTACGCGAAAANGGNGCATAGAAC-CTTCTATGAACCTAAAATC-

Rev.of\_GCF\_000752395.1\_Bacillus\_andreraoultii\_genomic.fna\_45:75443-75911

Satlength=469 Nr of Repeats=9 RepeatLength=52 seed=TTTTATCGAA Num.seqs=9

Similarity=0.833333

17

--

CACGATTTTCGATAAAACGGGATTATAGAAC-CTTCCTATGAACCCATTATTC

\* \* \*\*\* \*\* \*\*\* \*\* \*\*\* \*\*\* \*\*\* \*\*\*\*\* \* \* \* \*\* \*

Consensus:

ctcAaGTTTaCGcgAAAacgGGcgCATAgAACCTTcCTATgAaCCcAaaATc

>Bacillus\_Fam\_162\_53\_4 Nr. of seq. 4 Alignment length(with gaps) = 55

Alignment score = 0.636364





Similarity=0.842100 4  
GCGTTCCATA-CACCTTCTATGACACGCGAACTC--CTCTCGCTCTCCTCTTTTC  
GCF\_001648575.1\_ASM164857v1\_genomic.fna\_62:58957-59580 Satlength=624 Nr  
of Repeats=12 RepeatLength=52 seed=TCTATGACAC Num.seqs=9  
Similarity=0.816737  
15 GCGTTCCATT-CACCTTCTATGACACGCGTTTTCA-CTCCCGCTCT-CTACTTTC  
GCF\_001648575.1\_ASM164857v1\_genomic.fna\_67:75226-75644 Satlength=419 Nr  
of Repeats=8 RepeatLength=52 seed=TGACACGCGT Num.seqs=6  
Similarity=0.782922  
19 GCGTTTCATT-CACCTCCTATGACACGCGTTTTCA-CTNCCGCTCT-CGAAGTTT

\*\*\*\*\* \*\* \* \* \* \* \* \* \* \*

Consensus:

GCGTTcCATtCACcttCTATGACACgCGttttCaCTccCGCTCtCtattTTc

>Bacillus\_Fam\_165\_52\_4 Nr. of seq. 4 Alignment length(with gaps) = 55  
Alignment score = 0.602525  
GCF\_002019645.1\_ASM201964v1\_genomic.fna\_1:2030290-2031330 Satlength=1041  
Nr of Repeats=20 RepeatLength=52 seed=GTTTCAGACAG Num.seqs=20  
Similarity=0.811784 3  
AAGGTTTCAGACAGCTTTTAGCGTCTGG-CTCGANAAGCTGTCCGAAGTNGAGC--  
Rev.of\_GCF\_002019645.1\_ASM201964v1\_genomic.fna\_1:5152559-5153287  
Satlength=729 Nr of Repeats=14 RepeatLength=52 seed=AAAAGCTGTC  
Num.seqs=14 Similarity=0.904480  
17 AAG-TTCAGACAGCTTTTGCCGCATGG-CTCCTAAAGCTGTCCGAAGTAG-GCTC  
GCF\_002019645.1\_ASM201964v1\_genomic.fna\_1:2116675-2117143 Satlength=469  
Nr of Repeats=9 RepeatLength=52 seed=GAAAGCTGTC Num.seqs=9  
Similarity=0.798043 31  
CGGGTTCAGACAGCTTTTCCGTCCGAG-CACGGAAAGCTGTCCGAAGTTG-GN-C  
GCF\_002019645.1\_ASM201964v1\_genomic.fna\_1:4452843-4453467 Satlength=625  
Nr of Repeats=12 RepeatLength=52 seed=GTTTCAGACAG Num.seqs=12  
Similarity=0.821290 54  
CGGGTTCAGACAGCTTTTGCCTCCTAGCCACCG-AACCTGTCCGAAGTTG-AC-T

\*\*\*\*\* \* \* \* \* \* \* \* \*

Consensus:

gTTCAGACAGCTTTTgccgcctaGCaCcgaAAgCTGTCCGAAGtTgccaaG

>Bacillus\_Fam\_166\_52\_4 Nr. of seq. 4 Alignment length(with gaps) = 54  
Alignment score = 0.626543  
GCF\_000292245.2\_ASM29224v2\_genomic.fna\_5:78606-78963 Satlength=358 Nr of  
Repeats=7 RepeatLength=51 seed=TTTCATTACC Num.seqs=7 Similarity=0.737528  
0 -TTTCATTACCTATCCCA-GCTTTTTTCGCACTCTAATC-CCA-CAACCCACAAG  
GCF\_000292245.2\_ASM29224v2\_genomic.fna\_2:36979-37183 Satlength=205 Nr of  
Repeats=4 RepeatLength=51 seed=TTTCATTACC Num.seqs=4 Similarity=0.860566  
0 -TTTCATTACCTATCACA-GCTTTTTTCGCACTCTAATCTCGA-CATCCCCCAAC  
GCF\_000292245.2\_ASM29224v2\_genomic.fna\_17:33217-33472 Satlength=256 Nr of  
Repeats=5 RepeatLength=51 seed=TTTTCATTAC Num.seqs=5 Similarity=0.783007  
0 TTTTCATTACTTATCACC-ACTTTTTTCGCACCGTAATC-CCAGCACCACGCGG-  
Rev.of\_GCF\_000292245.2\_ASM29224v2\_genomic.fna\_16:189-393 Satlength=205 Nr  
of Repeats=4 RepeatLength=51 seed=GATAAGTAAT Num.seqs=4

Similarity=0.769231

15

TTTTTCATTACTTATCACCTACTTATTCGTACCCTAATT-CCGGCATCTCAAAA-

\*\*\*\*\* \* \* \* \* \* \* \* \* \*

Consensus:

tTTTCATTACcTATCaCaaCTTtTTCGcACccTAATcCcagCATCcCacaan

>Bacillus\_Fam\_167\_52\_4 Nr. of seq. 4 Alignment length(with gaps) = 54

Alignment score = 0.618827

GCF\_001636325.1\_ASM163632v1\_genomic.fna\_2:1366189-1366546 Satlength=358

Nr of Repeats=7 RepeatLength=51 seed=AAAAATGGTC Num.seqs=7

Similarity=0.891636

0

AAAAATGGTCATAGAGAGCGAAACTGGAACCAAAAATCCACG-AG--AAAACGA

GCF\_001636325.1\_ASM163632v1\_genomic.fna\_2:868067-868429 Satlength=363 Nr

of Repeats=7 RepeatLength=52 seed=GAAGTGAAC Num.seqs=5

Similarity=0.871795

20 AAAAATGGTCATAGAGTGAGGAAGTGAACCAAAAAGGCTCG-AGC-AAAGTGC

Rev.of\_GCF\_001636325.1\_ASM163632v1\_genomic.fna\_1:1668035-1668348

Satlength=314 Nr of Repeats=5 RepeatLength=52 seed=CTTCCCTGCA Num.seqs=3

Similarity=0.897436

50

CAAAATGGTCATAGATTGAGAACTGGAACCAAAAATGGTTGCAGG-GAAG-GT

GCF\_001636325.1\_ASM163632v1\_genomic.fna\_1:898598-898859 Satlength=262 Nr

of Repeats=5 RepeatLength=52 seed=AACTGGAACC Num.seqs=4

Similarity=0.846154

20 -AAAATGGTCATAGATATACAAACTGGAACCAAAAATCGAGCG-GGCTGAAGCCA

\*\*\*\*\* \* \* \*

Consensus:

aAAAAATGGTCATAGAgagagaAACTGGAACCAAAAatgctcGaGcaAAgcga

>Bacillus\_Fam\_168\_50\_4 Nr. of seq. 4 Alignment length(with gaps) = 54

Alignment score = 0.652778

GCF\_900104555.1\_IMG-

taxon\_2651870172\_annotated\_assembly\_genomic.fna\_16:149617-150076

Satlength=460 Nr of Repeats=9 RepeatLength=51 seed=TTTTGTCTTT Num.seqs=9

Similarity=0.819801

24 ACTTTTCTTGAGTCT-CCAC-C-

GATTTTGTCTTTCATAGNCTTGATGAAAG

Rev.of\_GCF\_900104555.1\_IMG-

taxon\_2651870172\_annotated\_assembly\_genomic.fna\_29:94987-95243

Satlength=257 Nr of Repeats=5 RepeatLength=51 seed=ATGAAAGACA Num.seqs=4

Similarity=0.745807

36 ACTTTTCCAAAAGAT-CCAC-CGGAT-

TTTGTCTTTCATAGCCTCGATGAAAG

GCF\_900104555.1\_IMG-

taxon\_2651870172\_annotated\_assembly\_genomic.fna\_19:193092-193875

Satlength=784 Nr of Repeats=7 RepeatLength=51 seed=ACTTTTCTT Num.seqs=5

Similarity=0.963399

50 ACTTTTCTTCTAGCT-CAACTC-

AAT-TTTGTCTTTCATAAGCTCGATGAAAG

Rev.of\_GCF\_900104555.1\_IMG-

taxon\_2651870172\_annotated\_assembly\_genomic.fna\_25:18116-18765

Satlength=650 Nr of Repeats=6 RepeatLength=51 seed=AAAATAGCTG Num.seqs=4

Similarity=0.891068

27 ACTTTTTCACGTGCTTACCAG-C-TAT-

TTTGTCTTTCATAAGCTTGATGAAGG

\*\*\*\*\* \*\* \*\*\*\*\* \*\*\*\*\* \* \* \* \* \*

Consensus:

TTTGTCTTTCATAagCTcGATGAAaGACTTTTTTcttgaagcTcAcCgAT

>Bacillus\_Fam\_169\_54\_4 Nr. of seq. 4 Alignment length(with gaps) = 54

Alignment score = 0.745885

GCF\_000186145.1\_Bacillus\_sp\_2\_A\_57\_CT2\_V1\_genomic.fna\_4:107252-107511

Satlength=260 Nr of Repeats=5 RepeatLength=52 seed=GCCGAAAATG Num.seqs=4

Similarity=0.709644 0

GCCGAAAATGTGATAGGGAAG-AG-GAAAAGGGTAGTTAATCAACCGGATTAAC

Rev.of\_GCF\_000294775.2\_ASM29477v2\_genomic.fna\_1:3523470-3523938

Satlength=469 Nr of Repeats=9 RepeatLength=52 seed=ACATTTTCGG Num.seqs=9

Similarity=0.804682 11

GCCGAAAATGTGGAGGGGAGG-AG-GAAACTGGTAGTTAATCGACTGGATTAAC

GCF\_000294775.2\_ASM29477v2\_genomic.fna\_1:910807-911429 Satlength=623 Nr

of Repeats=12 RepeatLength=52 seed=AACGACGAAA Num.seqs=10

Similarity=0.832054 49

GACGAAAACGTGG-AGAGA-GTAGAGAAAATGGTAGCTAATCAACCGGATTAAC

Rev.of\_GCF\_000186145.1\_Bacillus\_sp\_2\_A\_57\_CT2\_V1\_genomic.fna\_6:186939-

187251 Satlength=313 Nr of Repeats=5 RepeatLength=52 seed=TTTTCGTCGT

Num.seqs=4 Similarity=0.930818 60

GACGAAAACGTGG-AGAGAGGTAGAGAAAATGGTAGCTAATCAACCGGATTAAC

\* \*\*\*\*\* \*\*\* \* \* \* \* \* \*\*\*\*\* \*\*\*\*\* \* \* \*\*\*\*\*

Consensus:

GaCGAAAACGTGgnaGaGAgGtAGaGAAAatGGTAGcTAATCaACcGGATTAAC

>Bacillus\_Fam\_170\_52\_4 Nr. of seq. 4 Alignment length(with gaps) = 54

Alignment score = 0.600823

GCF\_000430765.1\_ASM43076v1\_genomic.fna\_6:155335-155595 Satlength=261 Nr

of Repeats=5 RepeatLength=52 seed=GGACTACTTT Num.seqs=5

Similarity=0.862893

0 GGACTACTTTCTCCTC--CTGCCGCTCAACCTGTCCGAACAGAGACCGCCTTC

GCF\_000430765.1\_ASM43076v1\_genomic.fna\_14:144417-144731 Satlength=315 Nr

of Repeats=6 RepeatLength=52 seed=TTCCGACTAC Num.seqs=5

Similarity=0.830769

49 GGACTACTTTCTCCGC--CNCCCGCTTCAACCTGTCCGAACCTGGACCGACTTC

GCF\_002019645.1\_ASM201964v1\_genomic.fna\_1:287166-287842 Satlength=677 Nr

of Repeats=13 RepeatLength=52 seed=CTTCGACAG Num.seqs=13

Similarity=0.833333 48

GGACAGCTTTAACCGC--NTGGCTCCTCAACCTGTCTGAACTTACTCTGACTTC

GCF\_002019645.1\_ASM201964v1\_genomic.fna\_1:4704557-4705493 Satlength=937

Nr of Repeats=18 RepeatLength=52 seed=TGAACCTGTC Num.seqs=18

Similarity=0.826714 76

GGACAGCTTT--CGGCTTCTGGCGCATGAACCTGTCCGAACCTGCCTTCACTTC

\*\*\*\* \* \* \* \* \* \* \* \* \* \* \* \* \* \* \* \* \* \* \* \* \*

Consensus:

GGACaaCTTTctCcgCctgcCgCcTcAACCTGTCCGAACttacaccgaCTTC

>Bacillus\_Fam\_171\_53\_4 Nr. of seq. 4 Alignment length(with gaps) = 54  
Alignment score = 0.641975  
GCF\_001636315.1\_ASM163631v1\_genomic.fna\_1:3109160-3109628 Satlength=469  
Nr of Repeats=9 RepeatLength=52 seed=GTCGCCTATA Num.seqs=9  
Similarity=0.729167 0  
GTCGCCTATAAGGCGTATACGCGACCG-AACGGNAGCCAAAA-AGAGTCCCTCG  
GCF\_001636315.1\_ASM163631v1\_genomic.fna\_1:3775783-3776095 Satlength=313  
Nr of Repeats=6 RepeatLength=52 seed=GTCGCATAGA Num.seqs=6  
Similarity=0.782906 0  
GTCGCATAGAAGGGGTATACGCGCCCG-AGCGGCGGAAAAAATGGAGGTGC-CG  
GCF\_001636315.1\_ASM163631v1\_genomic.fna\_1:5059185-5059445 Satlength=261  
Nr of Repeats=5 RepeatLength=52 seed=AGAAAAAGAA Num.seqs=5  
Similarity=0.792308 33  
GTCGCATAGAAAGAGTATATGCGACTG-AGCGGCAGAAAAAGAAGAGNNGC-CG  
GCF\_001636315.1\_ASM163631v1\_genomic.fna\_1:4975737-4976309 Satlength=573  
Nr of Repeats=11 RepeatLength=52 seed=GTCGCATAGA Num.seqs=9  
Similarity=0.720798 0  
GTCGCATAGAAGGCGTATACGCGACCGAAGCGGC-GAAAAAATCGTG-AGCTCG

\*\*\*\*\* \*\* \* \* \*\*\*\*\* \*\*\* \* \* \* \*\*\* \* \*\*\* \* \* \* \* \*\*  
Consensus:

GTCGCaTagAAgGcGTATAcGCGaCcGAgCGGcaGaaAAAataGaGnngCtCG

>Bacillus\_Fam\_172\_53\_4 Nr. of seq. 4 Alignment length(with gaps) = 54  
Alignment score = 0.720165  
GCF\_001636425.1\_ASM163642v1\_genomic.fna\_1:2633742-2634106 Satlength=365  
Nr of Repeats=6 RepeatLength=52 seed=ATGAAGGACT Num.seqs=5  
Similarity=0.677576 0  
ATGAAGGACTTTTCGCGCTCTTCTTGA-CCTGGTTTTGGCCTTCATAAGCCTN-  
Rev.of\_GCF\_001636425.1\_ASM163642v1\_genomic.fna\_1:4369053-4369313  
Satlength=261 Nr of Repeats=5 RepeatLength=52 seed=AAAGTCCTTC Num.seqs=5  
Similarity=0.776543 11 -  
TGAAGGACTTTGCTCGTCTTCTTGA-CCTGGTTTTGGTCTTCATTAGCTCGA  
Rev.of\_GCF\_001636425.1\_ASM163642v1\_genomic.fna\_1:4370800-4371268  
Satlength=469 Nr of Repeats=9 RepeatLength=52 seed=AAAGTCCTTC Num.seqs=9  
Similarity=0.820513 11 -  
TGAAGGACTTTGCTCGCTCTTCTTGA-CCGGGTTTTGGCCTTCATTAGCTTGA  
GCF\_001636425.1\_ASM163642v1\_genomic.fna\_1:3011924-3012184 Satlength=261  
Nr of Repeats=5 RepeatLength=52 seed=TTTTGTCCCTT Num.seqs=5  
Similarity=0.730818 32  
ATGAAGGACTTTTCTCGTTATTCTCCAGCCT-GTTTTGTCCCTTCATTCACTTT-

\*\*\*\*\* \* \* \* \* \* \* \* \* \* \* \* \* \* \* \* \*  
Consensus:

aTGAAGGACTTTgCtCGcTcTTcttgACctgGTTTTGgcCTTCATtagCttga

>Bacillus\_Fam\_173\_52\_4 Nr. of seq. 4 Alignment length(with gaps) = 54  
Alignment score = 0.661523  
GCF\_002019665.1\_ASM201966v1\_genomic.fna\_1:300861-301737 Satlength=877 Nr  
of Repeats=11 RepeatLength=52 seed=ATCGTGCCCT Num.seqs=9  
Similarity=0.871795 12  
GATCAAGCCGC-GATCGTGCCCTCTAAACGCCGAAAACG-AGAAAACAGGTAAC

GCF\_002019665.1\_ASM201966v1\_genomic.fna\_1:548830-549350 Satlength=521 Nr of Repeats=10 RepeatLength=52 seed=TCAAAACAAG Num.seqs=10  
 Similarity=0.955556 21  
 GATGAAG-CGTTGATCGTGCCCTCAAAACAAGAAAAACGAAAAATCG-GGTAAC  
 GCF\_002019665.1\_ASM201966v1\_genomic.fna\_1:2070270-2070894 Satlength=625  
 Nr of Repeats=12 RepeatLength=52 seed=AAAATAGAGG Num.seqs=12  
 Similarity=0.897436 38  
 GATGAAG-AGCGGATCGTGCCCTCTAAACGAGAAAAATG-AAAATAGAGGGAAC  
 Rev.of\_GCF\_002019665.1\_ASM201966v1\_genomic.fna\_1:4148016-4148588  
 Satlength=573 Nr of Repeats=11 RepeatLength=52 seed=TTTTCAGGGC  
 Num.seqs=11 Similarity=0.835897  
 79 GATGGAG-NGCTGATCGTGCCCTGAAAANNTGAAAAACG-AAAATAGAGGAAAC

\*\*\*\*\*    \*\*\*            \*\*\*\* \* \* \*    \*\*    \*\*\*\*\*    \*\*    \*    \*

Consensus:

ATCGTGCCCTcaAAAcgagaAAAACGAaAatagaGGtAACGATgaAGcGctG

>Bacillus\_Fam\_174\_54\_4 Nr. of seq. 4 Alignment length(with gaps) = 54  
 Alignment score = 0.763375  
 GCF\_000153365.1\_ASM15336v1\_genomic.fna\_16:423251-424048 Satlength=798 Nr of Repeats=15 RepeatLength=53 seed=GTCATGTATC Num.seqs=13  
 Similarity=0.864861 0  
 GTCATGTATCCCATCAGGTTCCCGGAATACATGAGTA-GGGAGAAAAAAGGATG  
 Rev.of\_GCF\_000473245.1\_ASM47324v1\_genomic.fna\_1:2388131-2388928  
 Satlength=798 Nr of Repeats=15 RepeatLength=53 seed=GATACATGAC  
 Num.seqs=13 Similarity=0.864861  
 10 GTCATGTATCCCATCAGGTTCCCGGAATACATGAGTA-GGGAGAAAAAAGGATG  
 GCF\_000153365.1\_ASM15336v1\_genomic.fna\_74:127356-128149 Satlength=794 Nr of Repeats=13 RepeatLength=53 seed=CGGGATACAT Num.seqs=10  
 Similarity=0.875891 22  
 GTCATGTATGCCAACAGGTTTCCGGGATACATG-GTATGACTGCAAGAAGGCTA  
 GCF\_000473245.1\_ASM47324v1\_genomic.fna\_1:2184010-2184804 Satlength=795 Nr of Repeats=13 RepeatLength=53 seed=CGGGATACAT Num.seqs=11  
 Similarity=0.875586 22  
 GTCATGTATGCCAACAGGTTTCCGGGATACATG-GTATGACTGCAAGAAGGCTA

\*\*\*\*\*    \*\*\*    \*\*\*\*\*    \*\*\*\*    \*\*\*\*\*    \*\*\*    \*    \*    \*\*    \*\*\*\*\*    \*

Consensus:

GTCATGTATcCCAaCAGGTTcCCGgaATACATGaGTAtGacaGaAAaAAGGaTa

>Bacillus\_Fam\_175\_54\_4 Nr. of seq. 4 Alignment length(with gaps) = 54  
 Alignment score = 0.627572  
 GCF\_000311725.1\_ASM31172v1\_genomic.fna\_1:927879-928355 Satlength=477 Nr of Repeats=9 RepeatLength=53 seed=CATGAAACAT Num.seqs=8  
 Similarity=0.891285  
 0 CATGAAACATACTTT-CCCTACAAATCCGCTCTTCTCTTGTCTCATGAACCCCT  
 Rev.of\_GCF\_000311725.1\_ASM31172v1\_genomic.fna\_2:132590-132855  
 Satlength=266 Nr of Repeats=5 RepeatLength=53 seed=ACATAAGTTG Num.seqs=5  
 Similarity=0.886420 40  
 CATGAGACATACATT-CTCTAAGAATGTGCTCAACTTATGTTCCATGAGCCCTT  
 GCF\_000311725.1\_ASM31172v1\_genomic.fna\_3:662414-662785 Satlength=372 Nr of Repeats=7 RepeatLength=53 seed=TGTATCATGA Num.seqs=7

Similarity=0.855046  
37 CATGTGACATACTTTCCTCTTCCAACCACCT-AACTTATGTATCATGAACCCTT  
GCF\_000311725.1\_ASM31172v1\_genomic.fna\_4:562666-563196 Satlength=531 Nr  
of Repeats=10 RepeatLength=53 seed=AGTTTGTGTT Num.seqs=10  
Similarity=0.865269  
CATGTGACATACTTTCCTCTGAAAACACCCT-GAGTTTGTGTTTCATGAACCCTT

85

\*\*\*\* \* \* \* \* \*  
Consensus:

CATGagACATACtTtCtCtTaaaAAccccCTcaacTtaTGTttCATGAaCCcTt

>Bacillus\_Fam\_176\_53\_4 Nr. of seq. 4 Alignment length(with gaps) = 54  
Alignment score = 0.659465  
GCF\_900156865.1\_PRJEB18960\_genomic.fna\_3:147620-148044 Satlength=425 Nr  
of Repeats=8 RepeatLength=53 seed=GATAAAATTA Num.seqs=8  
Similarity=0.733099  
0 GATAAAATTAGGAAAAAGCGAACCAGCAAACCCG-AAATGCAGGTACGCATTTG  
GCF\_900156865.1\_PRJEB18960\_genomic.fna\_3:564737-565055 Satlength=319 Nr  
of Repeats=6 RepeatLength=53 seed=GGATAAAATT Num.seqs=6  
Similarity=0.814815  
52 GATAAAATTAGGAAACGGCAAACCCGCAAACGAG-AGATACAGGTTCGCATTTG  
GCF\_900156865.1\_PRJEB18960\_genomic.fna\_3:163814-164132 Satlength=319 Nr  
of Repeats=6 RepeatLength=53 seed=CTTAACAGGT Num.seqs=6  
Similarity=0.833128  
34 GAAGAAATTAGGGAACACCGAACCCGCAAAGGCTCTTA-ACAGGTTCGCATATG  
GCF\_900156865.1\_PRJEB18960\_genomic.fna\_3:535365-535736 Satlength=372 Nr  
of Repeats=7 RepeatLength=53 seed=ATACAGGTTC Num.seqs=7  
Similarity=0.746914  
36 TAAAAAATTAGGGAANNCGAACCAGTAAAAGCG-ATATACAGGTTCGCAAATG

\* \* \* \* \*  
Consensus:

gAaaAAATTAGGaAAAagCgAACCaGcAAAcgcatAtaCAGGTtCGCAtaTG

>Bacillus\_Fam\_177\_51\_4 Nr. of seq. 4 Alignment length(with gaps) = 53  
Alignment score = 0.768344  
GCF\_000242895.2\_ASM24289v3\_genomic.fna\_1:507909-508266 Satlength=358 Nr  
of Repeats=7 RepeatLength=51 seed=AAAAATGGGA Num.seqs=7  
Similarity=0.820728  
0 AAAAATGGGAACGAAAGAGCCGCAATAATGCCCAAAATCCAAGAGTCG-C-AG  
Rev.of\_GCF\_000242895.2\_ASM24289v3\_genomic.fna\_1:4381175-4381532  
Satlength=358 Nr of Repeats=7 RepeatLength=51 seed=ATTTTGGGCA Num.seqs=7  
Similarity=0.828991 38  
AAAAATGGGAACCAAGAGCCGCAATGATGCCCAAAATCCAAGAGTCG-C-GG  
Rev.of\_GCF\_000242895.2\_ASM24289v3\_genomic.fna\_1:1303702-1303957  
Satlength=256 Nr of Repeats=5 RepeatLength=51 seed=GATTTTGGGC Num.seqs=5  
Similarity=0.750000 39  
AAAAATGGGAATCAAAGAGCCTCANTGATGCCCAAAATCCGAGAGTCG-C-GG  
Rev.of\_GCF\_000242895.2\_ASM24289v3\_genomic.fna\_1:2430720-2430925  
Satlength=206 Nr of Repeats=4 RepeatLength=51 seed=ATTTTGGGCA Num.seqs=3  
Similarity=0.912854 38  
AAAAACGGGAACGAAAGAGCCGTATTGATGCCCAAAATTC--GAGGCGACTGG

\*\*\*\*\*      \*\*\*\*\*      \* \*      \*\*\*\*\*      \*      \*\*\*      \* \*      \*

Consensus:

AAAAAtGGGAAccAAAGAGCCgcAaTgATGCCCCAAATcCaaGAGtCGCgG

>Bacillus\_Fam\_178\_52\_4    Nr. of seq. 4 Alignment length(with gaps) = 53

Alignment score = 0.633124

GCF\_001636325.1\_ASM163632v1\_genomic.fna\_1:40630-41088 Satlength=459 Nr of Repeats=9 RepeatLength=51 seed=ATAAGAAAGC    Num.seqs=8 Similarity=0.916900  
0    ATAAGAAAGCGCCGATTTCGCTCAAGAAACCCG-CCA-CTTGAGTCAAGTTG

GCF\_001636325.1\_ASM163632v1\_genomic.fna\_1:516349-516757 Satlength=409 Nr of Repeats=8 RepeatLength=51 seed=AGTTGATAAG    Num.seqs=8  
Similarity=0.798319

46    ATAAGAAAGTGCCGATTCCCATCAAGAAAACGGCCCA-C-CGAGTAAAGTTG

GCF\_001636325.1\_ASM163632v1\_genomic.fna\_3:614885-615192 Satlength=308 Nr of Repeats=6 RepeatLength=51 seed=GATAAGAAAG    Num.seqs=5  
Similarity=0.921569

50    ATAAGAAAGAGCCGTATTTCCATCAAGAACCCCG--AAGCCCGAATAAAGATG

Rev.of\_GCF\_001636325.1\_ASM163632v1\_genomic.fna\_1:2096119-2096476

Satlength=358 Nr of Repeats=7 RepeatLength=51 seed=TACAGATTTTC    Num.seqs=7  
Similarity=0.927793    43

ATAAGAAAGCACNGGATTCTCATCAAGAAAATCG-AAATC-TGTATAAAGCTG

\*\*\*\*\*      \* \*      \*\*\*      \*      \*\*\*\*\*      \*      \* \*      \*      \*      \*\*\*      \*\*

Consensus:

ATAAGAAAGcgCcGgATTccCaTCAAGAAaaccGcaAnCncGaaTaAAGtTG

>Bacillus\_Fam\_179\_53\_4    Nr. of seq. 4 Alignment length(with gaps) = 53

Alignment score = 0.742138

GCF\_000153365.1\_ASM15336v1\_genomic.fna\_12:126684-126892 Satlength=209 Nr of Repeats=4 RepeatLength=52 seed=CTTAGTCAGC    Num.seqs=4  
Similarity=0.876068

0    CTTAGTCAGCTGGACTAGAGCCCTCTG-TAAGGCAATTAAGAGTCCAGAGGGC

GCF\_000473245.1\_ASM47324v1\_genomic.fna\_1:1107975-1108183 Satlength=209 Nr of Repeats=4 RepeatLength=52 seed=CTTAGTCAGC    Num.seqs=4  
Similarity=0.876068    0

CTTAGTCAGCTGGACTAGAGCCCTCTG-TAAGGCAATTAAGAGTCCAGAGGGC

GCF\_000153365.1\_ASM15336v1\_genomic.fna\_16:507322-507582 Satlength=261 Nr of Repeats=5 RepeatLength=52 seed=GGGTCTTAGT    Num.seqs=5  
Similarity=0.876923

48    CTTAGTCGGCTGAACTAGTACCCTCTGATTTGAGAATTGCTAG-CCAGAGGGT

Rev.of\_GCF\_000473245.1\_ASM47324v1\_genomic.fna\_1:2304596-2304856

Satlength=261 Nr of Repeats=5 RepeatLength=52 seed=GACTAAGACC    Num.seqs=5  
Similarity=0.876923    59

CTTAGTCGGCTGAACTAGTACCCTCTGATTTGAGAATTGCTAG-CCAGAGGGT

\*\*\*\*\*      \*\*\*\*      \*\*\*\*\*      \*\*\*\*\*      \*      \*      \*\*\*\*\*      \*\*      \*\*\*\*\*

Consensus:

CTTAGTCaGCTGaACTAGaaCCCTCTGaTaaGacAATTaagAGtCCAGAGGGc





```
>Bacillus_Fam_184_52_4 Nr. of seq. 4 Alignment length(with gaps) = 53
Alignment score = 0.692872
GCF_001591665.1_ASM159166v1_genomic.fna_18:122146-122559 Satlength=414 Nr
of Repeats=8 RepeatLength=52 seed=TCCAATAACC Num.seqs=6
Similarity=0.849573 0
TCCAATAACCCCTATTGGATAC-CTTTTCTCCCACTTTTGCCTCCGTACGGGT
Rev.of_GCF_001591665.1_ASM159166v1_genomic.fna_53:24940-25253
Satlength=314 Nr of Repeats=6 RepeatLength=52 seed=GGTATCCAAT Num.seqs=5
Similarity=0.712821 23
TCCAATATGCCCGATTGGATACCCCTTTT-TCCNATNTTCTANCGGAACGGGN
GCF_001591665.1_ASM159166v1_genomic.fna_76:10574-10937 Satlength=364 Nr
of Repeats=7 RepeatLength=52 seed=ACCTTTTCTC Num.seqs=6
Similarity=0.870085
73 TCCAATAAGGCCGATTGGAAAC-CTTTTCTCCGATTTTTCCGGTGGAAACGGGT
```

GCF\_001591805.1\_ASM159180v1\_genomic.fna\_26:68567-68984 Satlength=418 Nr of Repeats=8 RepeatLength=52 seed=GGCTCCAATC Num.seqs=7  
Similarity=0.870574  
102 TCCAATCAAGCCTATTGGATAC-CTTTTCTCCAATTTTCCAGTGGAACGGGC

\*\*\*\*\* \*\* \*\*\*\*\* \*\* \*\*\*\*\* \*\*\* \* \*\*\* \* \*\*\*\*\*  
Consensus:

TCCAATaagcCCgATTGGAtACCTTTTcTCCnAttTTTccagcgGaACGGGt

>Bacillus\_Fam\_185\_52\_4 Nr. of seq. 4 Alignment length(with gaps) = 53  
Alignment score = 0.707547  
GCF\_001636315.1\_ASM163631v1\_genomic.fna\_1:1920272-1920895 Satlength=624  
Nr of Repeats=14 RepeatLength=52 seed=TTTGTCCCTT Num.seqs=9  
Similarity=0.760684 0  
TTTTGTCCCTTCATCNGCCTTATGAAGACCATTTTGGACCT-GGCTCACGCCTG  
Rev.of\_GCF\_001636315.1\_ASM163631v1\_genomic.fna\_1:2936759-2937122  
Satlength=364 Nr of Repeats=7 RepeatLength=52 seed=GATGAAGGAC Num.seqs=6  
Similarity=0.921368 14  
TTTTGTCCCTTCATCAGCCTTATGAAGACCATTTTGAACCT-GGATCCCGCCTG  
Rev.of\_GCF\_001636315.1\_ASM163631v1\_genomic.fna\_1:2922406-2923185  
Satlength=780 Nr of Repeats=15 RepeatLength=52 seed=ATGAAGACCA  
Num.seqs=14 Similarity=0.825021  
13 TTTTGGTCTTCATCCNGCTTATGAAGACCATTTTCGTTCCCTCGGC-CACGGCTG  
GCF\_001636315.1\_ASM163631v1\_genomic.fna\_1:1954829-1955089 Satlength=261  
Nr of Repeats=5 RepeatLength=52 seed=TATGAAGGAC Num.seqs=5  
Similarity=0.933333 19  
TTTTGGTCTTCATCGGGCTTATGAAGGACATTTTGAACCC-GGGTCCCAGCTA

\*\*\*\*\* \*\*\*\*\* \*\*\*\*\* \*\*\*\*\* \* \*\* \*\* \* \* \*\*  
Consensus:

TTTTGgcCTTCATCngcCTTATGAAGacCATTTtGaaCctGGctCaCgcCTg

>Bacillus\_Fam\_186\_51\_4 Nr. of seq. 4 Alignment length(with gaps) = 52  
Alignment score = 0.607906  
GCF\_000292245.2\_ASM29224v2\_genomic.fna\_4:29318-29828 Satlength=511 Nr of Repeats=10 RepeatLength=51 seed=GCACCGTAAT Num.seqs=10  
Similarity=0.784242  
0 GCACCGTAATTTTCNGCTCCCANCTTTTTCATTACCTATTCCT-TTTTATCC  
GCF\_000292245.2\_ASM29224v2\_genomic.fna\_4:4185-4491 Satlength=307 Nr of Repeats=6 RepeatLength=51 seed=TTTTTCATTA Num.seqs=6 Similarity=0.780342  
24 GCACCNTAATCACGGCAACTCAACTTTTTCATTACCTATTCCTACCCTATTC  
GCF\_000292245.2\_ASM29224v2\_genomic.fna\_14:17182-17488 Satlength=307 Nr of Repeats=6 RepeatLength=51 seed=TCATTACCTA Num.seqs=6 Similarity=0.750763  
28 GCTCCCTAATTTCTAAACCCCACTAGTTTCATTACCTATTCAC-CGTTATTC  
Rev.of\_GCF\_000292245.2\_ASM29224v2\_genomic.fna\_31:19400-19655  
Satlength=256 Nr of Repeats=5 RepeatLength=51 seed=ATTGGTAATG Num.seqs=5  
Similarity=0.803922 39  
GCACCGTAATTTTGGGATTCTCCTGTTTCATTACCAATTCAN-CGTTATTC

\*\* \*\* \*\*\*\* \* \*\*\*\*\* \*\*\*\*\* \*\*\* \*  
Consensus:

GCaCCgTAATttcggcacccCacctgTTTCATTACcTATTCatcgtTATtC

>Bacillus\_Fam\_187\_51\_4 Nr. of seq. 4 Alignment length(with gaps) = 52  
Alignment score = 0.695513  
GCF\_000292245.2\_ASM29224v2\_genomic.fna\_7:14915-15272 Satlength=358 Nr of  
Repeats=7 RepeatLength=51 seed=TTTCATTACT Num.seqs=7 Similarity=0.601190  
0 TTTCATTACTTATCNCNGTTTTTCGCACCCTAATT-CTGCNAATCTCNAAN  
Rev.of\_GCF\_000292245.2\_ASM29224v2\_genomic.fna\_21:11408-11714  
Satlength=307 Nr of Repeats=6 RepeatLength=51 seed=GATAAGTAAT Num.seqs=6  
Similarity=0.803050 14  
TTTCATTACTTATCCTAGGTTTTTCGCACCCTAATTCCGGCAAATCTC-AAG  
Rev.of\_GCF\_000292245.2\_ASM29224v2\_genomic.fna\_31:11-419 Satlength=409 Nr  
of Repeats=8 RepeatLength=51 seed=GTAATGAAAA Num.seqs=8  
Similarity=0.774043  
9 TTTCATTACCTATCCCGGTTTTTCGCACCCTAATCATGCTAAATTT-AAT  
GCF\_000292245.2\_ASM29224v2\_genomic.fna\_46:27-231 Satlength=205 Nr of  
Repeats=4 RepeatLength=51 seed=ATTTTCATTA Num.seqs=4 Similarity=0.814637  
49 TTTCATTACCTATCCCAAGTTTTTCGAACCCTAATCCCTGCAAACTT-CAT

\*\*\*\*\* \* \* \* \* \* \* \* \* \* \* \* \* \* \* \* \*  
Consensus:

TTTCATTACcTATCccagGTTTTTCGcACCcTAATccctGCaAAacTcaAt

>Bacillus\_Fam\_188\_52\_4 Nr. of seq. 4 Alignment length(with gaps) = 52  
Alignment score = 0.668803  
GCF\_000307875.1\_BABA1.0\_genomic.fna\_182:7089-7293 Satlength=205 Nr of  
Repeats=4 RepeatLength=51 seed=TGAAGGACAA Num.seqs=4 Similarity=0.904139  
0 TGAAGGACAAAACCTCTGTAAAAAT-CGGAAGAAATGTCCTTCATGAAGCCAA  
Rev.of\_GCF\_000759675.1\_ASM75967v1\_genomic.fna\_73:164831-165091  
Satlength=261 Nr of Repeats=5 RepeatLength=52 seed=AAGGACATTT Num.seqs=5  
Similarity=0.876923 41  
TGAAGGACAAAACCCCGTAGGAATACAGGAGAAATGTCCTTCATAAAGCCGA  
GCF\_000759675.1\_ASM75967v1\_genomic.fna\_155:210755-211118 Satlength=364 Nr  
of Repeats=6 RepeatLength=52 seed=AAAGAAATGT Num.seqs=4  
Similarity=0.854701 27  
TGAAGGACAAAACGCTGAAGAAAACCAAAGAAATGTCCTTCATAAGGTCTGA  
GCF\_001420715.1\_ASM142071v1\_genomic.fna\_22:535021-535281 Satlength=261 Nr  
of Repeats=5 RepeatLength=52 seed=AGGAAAAAGTG Num.seqs=5  
Similarity=0.979487 26  
TGAAGGACAAAACCCGATAGTAAATAGGAAAAGTGTCCTTCATCTTGTTAA

\*\*\*\*\* \* \* \* \* \* \* \* \* \* \* \* \* \* \* \* \*  
Consensus:

TGAAGGACAAAACcCtgtAgaAAaacagaAgAAaTGTCTTCATaaaGccaA

>Bacillus\_Fam\_189\_52\_4 Nr. of seq. 4 Alignment length(with gaps) = 52  
Alignment score = 0.784188  
GCF\_000153365.1\_ASM15336v1\_genomic.fna\_18:361319-361684 Satlength=366 Nr  
of Repeats=7 RepeatLength=52 seed=GGTTCTAGTC Num.seqs=6  
Similarity=0.835897  
0 GGTTCTAGTCGAGCGAACTAAGACCCTCTATCCTCCAAAATGTGATTCAGAG

```

Rev.of_GCF_000473245.1_ASM47324v1_genomic.fna_1:590850-591215
Satlength=366 Nr of Repeats=7 RepeatLength=52 seed=GACTAGAACC Num.seqs=6
Similarity=0.835897 10
GGTTCTAGTCGAGCGAACTAAGACCCTCTATTCTCCAAAATGTGATTTCAGAG
GCF_000153365.1_ASM15336v1_genomic.fna_59:11476-11844 Satlength=369 Nr of
Repeats=7 RepeatLength=52 seed=CACCCTCTAT Num.seqs=5 Similarity=0.687180
21 GGCCTTAGTCGGNCGGACTAACACCCTCTATTCTCNGCAAATGACTTTCAGAG
Rev.of_GCF_000473245.1_ASM47324v1_genomic.fna_1:1841148-1841516
Satlength=369 Nr of Repeats=7 RepeatLength=52 seed=ATAGAGGGTG Num.seqs=5
Similarity=0.697436 31
GGCCTTAGTCGGNCGGACTAACACCCTCTATTCTCNGCAAATGACTTTCAGAG

```

GGcccTAGTCGagCGaACTAAcACCCTCTATtCtcCAAATGacaTTCAGAG

\*\*\*\*\* \* \*\*\* \*\*\*\*\* \*\*\*\*\* \*\*\* \*\* \*\*\*\*\* \*

Consensus:

AAAATGTGTCTCAacCcqGTCaATGGAAaCACATAAcAAGaGATtaTGCTcA

Rev.of\_GCF\_001636325.1\_ASM163632v1\_genomic.fna\_2:1233431-1233639  
Satlength=209 Nr of Repeats=4 RepeatLength=52 seed=GTGTAGGCAA Num.seqs=4  
Similarity=0.901709 100  
TTTTGGTTCCAGTTACTCAATCTATGACCATTTTCTGTTGCCTACACCTAA

\*\*\*\*\* \* \*\*\* \*\*\*\*\* \* \* \*\*\*\* \*  
Consensus:

ttTTGGTTCCAGTTAcaCaatCTAtGACCATTTTctGcttgaCtaCACCcaA

>Bacillus\_Fam\_192\_45\_4 Nr. of seq. 4 Alignment length(with gaps) = 45  
Alignment score = 0.887654  
GCF\_000832605.1\_ASM83260v1\_genomic.fna\_1:3713478-3713688 Satlength=211 Nr  
of Repeats=5 RepeatLength=45 seed=CAAAATCCAT Num.seqs=3  
Similarity=0.597222 0  
CAAAATCCATATGCAGCANC GC-AACTCAAGAACAACAATATCAG  
Rev.of\_GCF\_000007825.1\_ASM782v1\_genomic.fna\_1:2093339-2093558  
Satlength=220 Nr of Repeats=5 RepeatLength=45 seed=CATATGGATT Num.seqs=4  
Similarity=0.876543 13  
CAAAATCCATATGTAGCACCACAAAACCAAGAACAACAATATCAA  
Rev.of\_GCF\_000831065.1\_ASM83106v1\_genomic.fna\_1:1910267-1910531  
Satlength=265 Nr of Repeats=6 RepeatLength=45 seed=CATATGGATT Num.seqs=5  
Similarity=0.905185 13  
CAAAATCCATATGCAGCACCACAAAACCAAGAACAACAATATCAA  
GCF\_001645555.1\_ASM164555v1\_genomic.fna\_12:630892-631111 Satlength=220 Nr  
of Repeats=5 RepeatLength=45 seed=CAAAATCCAT Num.seqs=4  
Similarity=0.742754 45  
CAAAATCCATATGCAGCACCACAAAATCAAGAACAACAATATCAA

\*\*\*\*\* \*\*\*\* \* \* \*\* \*\*\*\*\*  
Consensus:

CAAAATCCATATGcAGCAcCaCaAAacCAAGAACAACAATATCAa

>Bacillus\_Fam\_193\_42\_4 Nr. of seq. 4 Alignment length(with gaps) = 43  
Alignment score = 0.714470  
GCF\_001591425.1\_ASM159142v1\_genomic.fna\_67:17-228 Satlength=212 Nr of  
Repeats=5 RepeatLength=42 seed=TGGCCGAAAA Num.seqs=4 Similarity=0.830688  
0 TGGCCG-AAAAGCGACTGCAGTTGGCGCGAAAGCAAGTTGGGT  
GCF\_001591425.1\_ASM159142v1\_genomic.fna\_102:7924-8407 Satlength=484 Nr of  
Repeats=14 RepeatLength=42 seed=TTGGCGTGAA Num.seqs=9  
Similarity=0.848325  
20 TGGCCGAAAAAGCGT-CGCAGTTGGCGTGAAAGTGAGCTCAGT  
GCF\_001591425.1\_ASM159142v1\_genomic.fna\_150:3-528 Satlength=526 Nr of  
Repeats=11 RepeatLength=42 seed=GGCCGAAAAA Num.seqs=9  
Similarity=0.739506  
43 TGGCCGAAAAAGCGA-TGCAGTTGGCGTGAAAGTGAGTTCGGT  
GCF\_001591425.1\_ASM159142v1\_genomic.fna\_97:4685-4958 Satlength=274 Nr of  
Repeats=7 RepeatLength=42 seed=TGGCCGAAAA Num.seqs=6 Similarity=0.815873  
0 TGGCCGAAAAAGTAA-CCCAGTTGGCGCAAAAGTCCGTTCAGT

\*\*\*\*\* \*\*\*\*\* \*\*\*\* \* \* \*\*  
Consensus:

TGGCCGaAAAAGcgacgCAGTTGGCGcgAAAGtgaGtTcaGT

>Bacillus\_Fam\_194\_40\_4 Nr. of seq. 4 Alignment length(with gaps) = 40  
Alignment score = 0.730556  
GCF\_000153365.1\_ASM15336v1\_genomic.fna\_18:178288-178478 Satlength=191 Nr  
of Repeats=5 RepeatLength=38 seed=AAAAGAGCCA Num.seqs=3  
Similarity=0.906433  
0 AAAAGAGCCAACGGAACCGTCCCCCTGGCCCAGTTTCA--  
Rev.of\_GCF\_000473245.1\_ASM47324v1\_genomic.fna\_1:774018-774208  
Satlength=191 Nr of Repeats=5 RepeatLength=38 seed=TTGGCTCTTT Num.seqs=3  
Similarity=0.906433 11  
AAAAGAGCCAACGGAACCGTCCCCCTGGCCCAGTTTCA--  
GCF\_000153365.1\_ASM15336v1\_genomic.fna\_18:449580-449794 Satlength=215 Nr  
of Repeats=5 RepeatLength=40 seed=GGTCTGTCCC Num.seqs=3  
Similarity=0.911111  
13 AAATGAGCCATGGGGTCTGTCCCCCGGCCCTGCTCCAAA  
Rev.of\_GCF\_000473245.1\_ASM47324v1\_genomic.fna\_1:503588-503802  
Satlength=215 Nr of Repeats=5 RepeatLength=40 seed=GGGACAGACC Num.seqs=3  
Similarity=0.911111 23  
AAATGAGCCATGGGGTCTGTCCCCCGGCCCTGCTCCAAA

\*\*\* \*\* \* \* \*\* \* \* \*

Consensus:

AAAaGAGCCAacGGaaCcGTCCCCcGGCCCaGcTcCAaa

>Bacillus\_Fam\_195\_40\_4 Nr. of seq. 4 Alignment length(with gaps) = 40  
Alignment score = 0.661111  
GCF\_000612665.1\_FF4\_genomic.fna\_56:12424-12580 Satlength=157 Nr of  
Repeats=4 RepeatLength=39 seed=GTAAAGCGGT Num.seqs=4 Similarity=0.880342  
0 GTAAAGCGGTGATGCGCTGGGGGCCAGTCCCCCGCT-AAG  
Rev.of\_GCF\_000612665.1\_FF4\_genomic.fna\_72:69320-69476 Satlength=157 Nr of  
Repeats=4 RepeatLength=39 seed=CTTACCGCT Num.seqs=4 Similarity=0.863248  
13 -TAAAGCGGTGAAGCGCTGGGGGACAGGCCCCCGCTGAAG  
Rev.of\_GCF\_000612665.1\_FF4\_genomic.fna\_72:117051-117206 Satlength=156 Nr  
of Repeats=4 RepeatLength=39 seed=CTGTCCCCCA Num.seqs=3  
Similarity=0.977208  
27 ATAAAGCGTTACTGTGATGGGGGACAGGCCCCCGCT-GTG  
Rev.of\_GCF\_000612665.1\_FF4\_genomic.fna\_72:111644-111839 Satlength=196 Nr  
of Repeats=5 RepeatLength=39 seed=GGGGGCCTGT Num.seqs=5  
Similarity=0.829060  
32 -TAAAGCAGTAACGCACTGAGGGACAGGCCCCACCCAAG

\*\*\*\*\* \* \* \*\* \*\* \* \* \* \* \*

Consensus:

nTAAAGCggTaatGcgctGgGGGaCAGgCCCCgCtnaaG

>Bacillus\_Fam\_196\_40\_4 Nr. of seq. 4 Alignment length(with gaps) = 40  
Alignment score = 0.686111  
GCF\_000285535.1\_ASM28553v1\_genomic.fna\_7:68195-68355 Satlength=161 Nr of  
Repeats=5 RepeatLength=40 seed=GAGACGCAAA Num.seqs=3 Similarity=0.731707  
0 GAGACGCAAAATCTTAATTTGACGCAAAATCCTCAGAAAT

GCF\_000285535.1\_ASM28553v1\_genomic.fna\_7:68195-69241 Satlength=1047 Nr of Repeats=16 RepeatLength=40 seed=GAGACGCAAA Num.seqs=12  
 Similarity=0.745455  
 0 GAGACGCAAAAATCTGAGTTATGACGCAAATCTTCAGAAC  
 Rev.of\_GCF\_000285535.1\_ASM28553v1\_genomic.fna\_56:13-336 Satlength=324 Nr of Repeats=8 RepeatLength=40 seed=TTTTTGCGTC Num.seqs=5  
 Similarity=0.739683  
 12 CAGACGCAAAAATAAGGATTTTCGACGCAAATCCGTGGANG  
 GCF\_000285535.1\_ASM28553v1\_genomic.fna\_57:33-354 Satlength=322 Nr of Repeats=8 RepeatLength=40 seed=GACGCAAAAA Num.seqs=7 Similarity=0.723810  
 42 CAGACGCAAAAATTAGGATTTTCGACGCAAATCCNTGGGCG

\*\*\*\*\* \*\* \*\*\*\*\* \*  
 Consensus:

cAGACGCAAAAATcagaaTTtcGACGCAAATCctcaGaag

>Bacillus\_Fam\_197\_36\_4 Nr. of seq. 4 Alignment length(with gaps) = 36  
 Alignment score = 0.608025  
 GCF\_000007825.1\_ASM782v1\_genomic.fna\_1:2540573-2540735 Satlength=163 Nr of Repeats=5 RepeatLength=36 seed=CCAGTCGGTC Num.seqs=4  
 Similarity=0.833333  
 0 CCAGTCGGTCCAGTAATACCAGTCCTTCCAGTAACA  
 GCF\_000017425.1\_ASM1742v1\_genomic.fna\_1:1048468-1048891 Satlength=424 Nr of Repeats=11 RepeatLength=36 seed=CCAGTAATAC Num.seqs=9  
 Similarity=0.962963  
 CCAGTTGGTCCAGTAATACCAGTTTCTCCTGTAGGT  
 Rev.of\_GCF\_001895885.1\_ASM189588v1\_genomic.fna\_1:1987676-1989071  
 Satlength=1396 Nr of Repeats=31 RepeatLength=36 seed=GGGATCACTG  
 Num.seqs=26 Similarity=0.727521  
 20 CCAGTTGATCCAGTGATCCCTGTNGCNCCAGTAGGT  
 GCF\_000715205.1\_SOAPdenovo\_v1.05\_genomic.fna\_25:483-1086 Satlength=604 Nr of Repeats=10 RepeatLength=36 seed=CCCGTGTTTC Num.seqs=6  
 Similarity=0.802469  
 CCAGTCGGACCACTTGTACCCGTGTTTCTGTGCA

\*\*\*\*\* \* \*\*\* \* \* \*\* \*\* \*\* \*\*  
 Consensus:

CCAGTcGgtCCAgTaaTaCCaGTntctCCaGTagca

>Bacillus\_Fam\_198\_36\_4 Nr. of seq. 4 Alignment length(with gaps) = 36  
 Alignment score = 0.804012  
 GCF\_000007845.1\_ASM784v1\_genomic.fna\_1:2735864-2736314 Satlength=451 Nr of Repeats=12 RepeatLength=36 seed=TCTTCCTTAG Num.seqs=11  
 Similarity=0.805387  
 TCTTCCTTAGGTTTNGCTACTTCTTGGACTTTCACT  
 Rev.of\_GCF\_001645555.1\_ASM164555v1\_genomic.fna\_51:179190-179442  
 Satlength=253 Nr of Repeats=7 RepeatLength=36 seed=GAAAGTCCAA Num.seqs=7  
 Similarity=0.915344  
 TCTTCCTTAGGCTTTACTACTTCTTGGACTTTTCGCT  
 GCF\_000008505.1\_ASM850v1\_genomic.fna\_1:2775427-2776093 Satlength=667 Nr of Repeats=18 RepeatLength=36 seed=CTTCTTCCTT Num.seqs=17



```

Similarity=0.784314
TCTTCCTTAGCTTTNGCTATTTCTTGTGCTTTTGCT
GCF_000496285.1_ASM49628v1_genomic.fna_1:232428-232860 Satlength=433 Nr
of Repeats=10 RepeatLength=36 seed=GCTATTCTT Num.seqs=8
Similarity=0.873016
51 TCTTCCTTAGCCTTTGCTATTTCTTGGGCTTTCGCT

***** ** *** ***** ***** **
Consensus:

TCTTCCTTAGccTTtgCTAcTTCTTGgaCTTTcgCT

>Bacillus_Fam_199_36_4 Nr. of seq. 4 Alignment length(with gaps) = 36
Alignment score = 0.658951
GCF_000775975.1_ASM77597v1_genomic.fna_1:1148498-1150349 Satlength=1852
Nr of Repeats=44 RepeatLength=36 seed=CCCGTGTTAC Num.seqs=28
Similarity=0.803155
CCCGTGTTACCTTGAGCNCCTTGAGGTCCAGTAGCA
Rev.of_GCF_001645555.1_ASM164555v1_genomic.fna_45:36-216 Satlength=181 Nr
of Repeats=5 RepeatLength=36 seed=TCAAGGTAAC Num.seqs=3
Similarity=0.851852
CCCGTGTTACCTTGAGCACCTTGAGGTCCAGTAGCG
GCF_001645555.1_ASM164555v1_genomic.fna_50:0-323 Satlength=324 Nr of
Repeats=9 RepeatLength=36 seed=GTGTTACCTT Num.seqs=9 Similarity=0.797297
3 CCCGTGTTACCTTGAGGTCCAGTAGCACCGGTAGCG
GCF_001439635.1_ASM143963v1_genomic.fna_165:51610-51799 Satlength=190 Nr
of Repeats=5 RepeatLength=36 seed=CCCTTATCTC Num.seqs=4
Similarity=0.827160
9 CCTGTGTCACCCTTATCTCCTTGTGGTCCTGTTGCT

** ***** ** * * ** * ** ** **
Consensus:

CCcGTGTtACcTtGAgctCcttgaGgtCCaGTaGCg

>Bacillus_Fam_200_36_4 Nr. of seq. 4 Alignment length(with gaps) = 36
Alignment score = 0.780864
GCF_001439635.1_ASM143963v1_genomic.fna_69:47-182 Satlength=136 Nr of
Repeats=4 RepeatLength=36 seed=CCAGTAGGTC Num.seqs=3 Similarity=0.851852
0 CCAGTAGGTCCAGTGTTNCCAGTAAATCCNGTAGCC
GCF_001439635.1_ASM143963v1_genomic.fna_173:47-182 Satlength=136 Nr of
Repeats=4 RepeatLength=36 seed=CCAGTAGGTC Num.seqs=3 Similarity=0.925926
0 CCAGTAGGTCCAGTGTTCCCAGTAAATCCGGTAGCC
GCF_001439635.1_ASM143963v1_genomic.fna_175:55401-55545 Satlength=145 Nr
of Repeats=4 RepeatLength=36 seed=GTAAATCCGG Num.seqs=4
Similarity=0.889640
21 CCAGTAGGCCAGTGATTCCGGTAAATCCGGTAGCC
Rev.of_GCF_001645555.1_ASM164555v1_genomic.fna_8:14-248 Satlength=235 Nr
of Repeats=5 RepeatLength=36 seed=ACTGGAACA Num.seqs=4
Similarity=0.787538
5 CCAGTAGGTCCGGTGATGCCGGTAGATCCAGTGTTTC

***** ** *** * ** ***** ** *
Consensus:

```

CCAGTAGGtCCaGTGaTnCCaGTAAATCCgGTagcC

>Bacillus\_Fam\_201\_33\_4 Nr. of seq. 4 Alignment length(with gaps) = 35  
Alignment score = 0.651587  
GCF\_001578185.1\_ASM157818v1\_genomic.fna\_1:3749385-3749913 Satlength=529  
Nr of Repeats=16 RepeatLength=33 seed=CCTCCCATCA Num.seqs=16  
Similarity=0.768919 0  
-CCTCCCATCATTCCTGGTTGACCTCCTGGATGG-  
GCF\_001578185.1\_ASM157818v1\_genomic.fna\_1:3749385-3750507 Satlength=1123  
Nr of Repeats=33 RepeatLength=33 seed=CCTCCCATCA Num.seqs=32  
Similarity=0.696781 0  
-CCTCCCATCATNCCTGGNTGGCCTCCTTGATGA-  
GCF\_001578185.1\_ASM157818v1\_genomic.fna\_1:3750017-3750692 Satlength=676  
Nr of Repeats=16 RepeatLength=33 seed=CATCATGCCT Num.seqs=12  
Similarity=0.815211 5  
-CTTCCCATCATGCCTGAATGGCTTCCTTGATGAC  
GCF\_001645685.2\_ASM164568v2\_genomic.fna\_1:3344937-3345585 Satlength=649  
Nr of Repeats=19 RepeatLength=33 seed=CCGCCCATCA Num.seqs=12  
Similarity=0.884910 1  
ACCGCCCATCATGCCGGGCTGACCTCCATTTG--

\* \* \* \* \*

Consensus:

CctCCCATCATgCcTggnTGaCcTCcTtgaTGa

>Bacillus\_Fam\_202\_27\_4 Nr. of seq. 4 Alignment length(with gaps) = 28  
Alignment score = 0.646825  
GCF\_000262045.1\_KCTC\_13613\_01\_genomic.fna\_51:24-285 Satlength=262 Nr of  
Repeats=7 RepeatLength=27 seed=CCAGTTACTC Num.seqs=5 Similarity=0.945679  
0 -CCAGTTACTCCTGTTGCTCCTGTTGGA  
GCF\_001712755.1\_ASM171275v1\_genomic.fna\_9:108050-108311 Satlength=262 Nr  
of Repeats=11 RepeatLength=27 seed=GCTCCTGTCTG Num.seqs=7  
Similarity=0.985891 7  
TCCAGTTGCTCCTGTCTGCTCCAGCTGT-  
Rev.of\_GCF\_000706725.1\_ASM70672v1\_genomic.fna\_1:1393225-1394061  
Satlength=837 Nr of Repeats=18 RepeatLength=27 seed=TTAGATGGAG  
Num.seqs=13 Similarity=0.953150  
8 -CCATCTAATCCTGTCTGGTCCCGTTGCT  
GCF\_002019765.1\_ASM201976v1\_genomic.fna\_1:2612055-2612922 Satlength=868  
Nr of Repeats=22 RepeatLength=27 seed=TCCATCTAAT Num.seqs=18  
Similarity=0.917050 26  
-CCATCTAATCCTGTCTGGTCCCGTTGCT

\*\*\* \* \* \* \* \*

Consensus:

CCAgcTaaTCCTGTcGcTCCcGtTGct

>Bacillus\_Fam\_203\_27\_4 Nr. of seq. 4 Alignment length(with gaps) = 27  
Alignment score = 0.711934

BACILLUS\_PSEUDALCALIPHILUS\_genomic.fna\_2:129261-129369 Satlength=109 Nr of Repeats=4 RepeatLength=27 seed=GGAGTAACCG Num.seqs=4 Similarity=0.893004  
0 GGAGTAACCGGAGCGACAGGAATGCCA  
GCF\_000007845.1\_ASM784v1\_genomic.fna\_1:2280509-2280779 Satlength=271 Nr of Repeats=9 RepeatLength=27 seed=GGAATAACGG Num.seqs=8  
Similarity=0.821869  
18 GGAGTGACAGGTCCAACAGGAATAACG  
GCF\_000008505.1\_ASM850v1\_genomic.fna\_1:2328181-2328613 Satlength=433 Nr of Repeats=14 RepeatLength=27 seed=GGAATAACGG Num.seqs=12  
Similarity=0.831650 18  
GGAGCAACAGGTCCGACGGGAATAACG  
Rev.of\_GCF\_000017425.1\_ASM1742v1\_genomic.fna\_1:3294429-3294681  
Satlength=253 Nr of Repeats=9 RepeatLength=27 seed=GTTGCTCCTG Num.seqs=8  
Similarity=0.987654 35  
GGAGCAACCGGTCCAACGGGAATAACA

\*\*\*\* \*\* \* \* \*\* \*\*\*\*\* \*

Consensus:

GGAGcaACaGGtcCaACaGGAATaaCa

>Bacillus\_Fam\_204\_25\_4 Nr. of seq. 4 Alignment length(with gaps) = 25  
Alignment score = 0.617778  
GCF\_000175075.1\_ASM17507v1\_genomic.fna\_44:33119-33407 Satlength=289 Nr of Repeats=11 RepeatLength=24 seed=GCTGCTGCTT Num.seqs=10  
Similarity=0.851852  
0 GCTGCTGCTTCTGCCTCCGC-TTTG  
Rev.of\_GCF\_001636335.1\_ASM163633v1\_genomic.fna\_1:273946-274090  
Satlength=145 Nr of Repeats=6 RepeatLength=24 seed=GCCAAAGCGA Num.seqs=6  
Similarity=0.911111 2  
GCCTCTGCTTCTGCCTTCGC-TTTG  
Rev.of\_GCF\_000321185.1\_ASM32118v1\_genomic.fna\_111:34583-34703  
Satlength=121 Nr of Repeats=5 RepeatLength=24 seed=CAGGCAAAAG Num.seqs=5  
Similarity=0.933333 4 -  
CCTGCGCCTCTGCTTCAGCTTTTG  
Rev.of\_GCF\_000430785.1\_ASM43078v1\_genomic.fna\_23:12805-12925  
Satlength=121 Nr of Repeats=5 RepeatLength=24 seed=AAAGCAGAGG Num.seqs=5  
Similarity=0.977778 22  
-CTTTCGCATCTGCCTCTGCTTTTG

\* \*\* \*\*\*\*\* \* \*\* \*\*\*\*\*

Consensus:

gCctccGctTCTGCcTccGctTTTG

>Bacillus\_Fam\_205\_24\_4 Nr. of seq. 4 Alignment length(with gaps) = 24  
Alignment score = 0.805556  
GCF\_000007825.1\_ASM782v1\_genomic.fna\_1:1044010-1044106 Satlength=97 Nr of Repeats=4 RepeatLength=24 seed=CCTGGAACAC Num.seqs=4 Similarity=0.824074  
0 CCTGGAACACCAGATCCAGAAAAA  
GCF\_000831065.1\_ASM83106v1\_genomic.fna\_1:894250-894442 Satlength=193 Nr of Repeats=7 RepeatLength=24 seed=ATCCAGAAAA Num.seqs=6  
Similarity=0.881481  
13 CCTGGAACACCAGATCCAGAAAAA

Rev.of\_GCF\_000775975.1\_ASM77597v1\_genomic.fna\_1:3721872-3721992  
 Satlength=121 Nr of Repeats=5 RepeatLength=24 seed=TCTGGATCTG Num.seqs=5  
 Similarity=0.833333 20  
 CCGGAAAAACCAGATCCAGAAAAA  
 Rev.of\_GCF\_001645555.1\_ASM164555v1\_genomic.fna\_16:33671-33767  
 Satlength=97 Nr of Repeats=4 RepeatLength=24 seed=TCTGGATCCG Num.seqs=4  
 Similarity=0.935185 20  
 CCAGAAACAACGGATCCAGAGAAA

\*\* \* \*\* \* \* \*\*\*\*\* \*\*

Consensus:

CCtGaAAcAcCaGATCCAGaAAA

>Bacillus\_Fam\_206\_20\_4 Nr. of seq. 4 Alignment length(with gaps) = 23  
 Alignment score = 0.718599  
 GCF\_001877785.1\_PlanoSAMB\_genomic.fna\_33:9772-9852 Satlength=81 Nr of  
 Repeats=4 RepeatLength=20 seed=TATGATCCAT Num.seqs=4 Similarity=0.542929  
 0 TATGATCCATT--CTGAAATTA  
 Rev.of\_GCF\_900094975.1\_IMG-  
 taxon\_2617270721\_annotated\_assembly\_genomic.fna\_4:70413-70513  
 Satlength=101 Nr of Repeats=5 RepeatLength=20 seed=AATGGATCAT Num.seqs=5  
 Similarity=0.693939 11 TATGATCCATT-T-CNGAAATA-  
 GCF\_001877785.1\_PlanoSAMB\_genomic.fna\_85:133615-133695 Satlength=81 Nr of  
 Repeats=4 RepeatLength=20 seed=TATGATCCAT Num.seqs=4 Similarity=0.671958  
 21 TATGATCCATT-TCCAGAAATA-  
 GCF\_001877785.1\_PlanoSAMB\_genomic.fna\_106:22377-22457 Satlength=81 Nr of  
 Repeats=4 RepeatLength=20 seed=TATGATCCAT Num.seqs=4 Similarity=0.683862  
 21 TATGATCCATTCT-CAGAAATT-

\*\*\*\*\* \* \*\*\*\*\*

Consensus:

TATGATCCATTtCaGAAATa

>Bacillus\_Fam\_207\_21\_4 Nr. of seq. 4 Alignment length(with gaps) = 23  
 Alignment score = 0.642512  
 GCF\_000612805.1\_FF3\_genomic.fna\_1:291005-291088 Satlength=84 Nr of  
 Repeats=4 RepeatLength=21 seed=AACATGGAAT Num.seqs=3 Similarity=0.809524  
 0 AACATGGAATAAA-C-TCCGNAA  
 GCF\_000612805.1\_FF3\_genomic.fna\_1:447160-447244 Satlength=85 Nr of  
 Repeats=4 RepeatLength=21 seed=CATGGAATAA Num.seqs=4 Similarity=0.654040  
 2 TTCATGGAATAAA-C-TCTGAAA  
 GCF\_000612805.1\_FF3\_genomic.fna\_8:67783-67867 Satlength=85 Nr of  
 Repeats=4 RepeatLength=21 seed=TGGAATAAAC Num.seqs=4 Similarity=0.732323  
 4 AACATGGAATAAA-CNTCTGANA  
 GCF\_000612805.1\_FF3\_genomic.fna\_3:573446-573530 Satlength=85 Nr of  
 Repeats=4 RepeatLength=21 seed=GTAGAATAAA Num.seqs=4 Similarity=0.646465  
 3 AATGTAGAATAAANC-TCCGAAA

\* \*\*\*\*\* \* \*\* \*

Consensus:

aacaTgGAATAAACTCcGaaA

>Bacillus\_Fam\_208\_21\_4 Nr. of seq. 4 Alignment length(with gaps) = 22  
Alignment score = 0.604798  
GCF\_000294775.2\_ASM29477v2\_genomic.fna\_1:4944734-4944837 Satlength=104 Nr  
of Repeats=5 RepeatLength=21 seed=TCTATTTGCA Num.seqs=3  
Similarity=0.490741 0  
TCTATTTGCAG-NTTNCGGC-  
Rev.of\_GCF\_001591465.1\_ASM159146v1\_genomic.fna\_37:37195-37419  
Satlength=225 Nr of Repeats=10 RepeatLength=20 seed=CTGCAAATAG  
Num.seqs=6 Similarity=0.659788  
10 CCTATTTGCAG--TTCCGGTT  
Rev.of\_GCF\_000986785.1\_ASM98678v1\_genomic.fna\_5:144649-145040  
Satlength=392 Nr of Repeats=15 RepeatLength=21 seed=GCAAATAGAA  
Num.seqs=11 Similarity=0.592496  
9 TCTATTTGCCG-NTTTCNANT  
Rev.of\_GCF\_000986785.1\_ASM98678v1\_genomic.fna\_4:84896-85225 Satlength=330  
Nr of Repeats=12 RepeatLength=21 seed=GCAAATAGAA Num.seqs=8  
Similarity=0.590278 9  
TCTATTTGCCGATTTTCNCATT

\*\*\*\*\* \* \*\*\*

Consensus:

tCTATTTGCaGnTTTccgatt

>Bacillus\_Fam\_209\_22\_4 Nr. of seq. 4 Alignment length(with gaps) = 22  
Alignment score = 0.651515  
GCF\_000401235.1\_BacNeaAAU1\_genomic.fna\_227:43989-44111 Satlength=123 Nr  
of Repeats=6 RepeatLength=20 seed=AGTCGCAAGT Num.seqs=4  
Similarity=0.837302  
0 AGTCGCAAGTAAGAG-GG-GAG  
Rev.of\_GCF\_000401235.1\_BacNeaAAU1\_genomic.fna\_157:4403-4508 Satlength=106  
Nr of Repeats=5 RepeatLength=21 seed=TTACTTGCGA Num.seqs=5  
Similarity=0.715151 12  
AGTCGCAAGTAAAG-GGTGAA  
Rev.of\_GCF\_000401235.1\_BacNeaAAU1\_genomic.fna\_154:1239-1364 Satlength=126  
Nr of Repeats=6 RepeatLength=21 seed=CTTGCGACTC Num.seqs=5  
Similarity=0.743939 9  
AGTCGCAAGAAAAAGTGTCGG-  
Rev.of\_GCF\_000401235.1\_BacNeaAAU1\_genomic.fna\_164:34058-34338  
Satlength=281 Nr of Repeats=13 RepeatLength=21 seed=TTACTTGCGA  
Num.seqs=12 Similarity=0.826840  
12 AGTCGCAAGTAAAGGTGGGGA-

\*\*\*\*\* \*\* \* \* \*

Consensus:

AGTCGCAAGtAAaaGtGgnGan

>Bacillus\_Fam\_210\_21\_4 Nr. of seq. 4 Alignment length(with gaps) = 22  
Alignment score = 0.650253  
GCF\_000986785.1\_ASM98678v1\_genomic.fna\_3:201618-201723 Satlength=106 Nr  
of Repeats=5 RepeatLength=21 seed=GTAGAGTAAA Num.seqs=5

Similarity=0.442667

0 GTAGAGTAAACT-AANAAATT-

GCF\_001315085.1\_ASM131508v1\_genomic.fna\_38:31481-31582 Satlength=102 Nr of Repeats=4 RepeatLength=20 seed=TTAGTAGATA Num.seqs=3

Similarity=0.631313

17 GTAGA-TAAAAT-CAGAAATTA

GCF\_000986785.1\_ASM98678v1\_genomic.fna\_25:55323-55428 Satlength=106 Nr of Repeats=4 RepeatLength=21 seed=GTAGAGTAAA Num.seqs=3 Similarity=0.505050

0 GTAGAGTAAANTNCTGAAANT-

GCF\_000986785.1\_ASM98678v1\_genomic.fna\_39:16547-16652 Satlength=106 Nr of Repeats=4 RepeatLength=21 seed=GTAGAGTAAA Num.seqs=3 Similarity=0.505050

0 GTAGAGTAAANTNCTGAAANT-

\*\*\*\*\* \* \* \* \*

Consensus:

GTAGAgTAAAnTncagAAAtT

>Bacillus\_Fam\_211\_21\_4 Nr. of seq. 4 Alignment length(with gaps) = 22

Alignment score = 0.656566

GCF\_001636335.1\_ASM163633v1\_genomic.fna\_1:2068723-2068964 Satlength=242

Nr of Repeats=12 RepeatLength=20 seed=TTTGCGAATT Num.seqs=9

Similarity=0.766667

0

TTTGCGAATTTCATT-C-TTTA

Rev.of\_GCF\_000508325.1\_BAVI\_1\_genomic.fna\_111:18515-18598 Satlength=84 Nr of Repeats=4 RepeatLength=21 seed=ATTCGCTAAT Num.seqs=3

Similarity=0.626263

9

TTAGCGAATTTCNAA-CATTTA

Rev.of\_GCF\_000752035.1\_Bacillus\_rubiinfantis\_genomic.fna\_30:250624-250707 Satlength=84 Nr of Repeats=4 RepeatLength=21 seed=TCGCTAATAA Num.seqs=3

Similarity=0.746032

29

TTAGCGAA-

TTCAAAGCATTTA

Rev.of\_GCF\_000752035.1\_Bacillus\_rubiinfantis\_genomic.fna\_18:190500-190624 Satlength=125 Nr of Repeats=6 RepeatLength=21 seed=TCGCTAATAA Num.seqs=4

Similarity=0.666667

28

TTAGCGATTTCAAT-CACTTA

\*\* \* \* \* \* \* \* \*

Consensus:

TTaGCGAatTTCaaaCatTTA

>Bacillus\_Fam\_212\_21\_4 Nr. of seq. 4 Alignment length(with gaps) = 22

Alignment score = 0.631313

GCF\_900104555.1\_IMG-

taxon\_2651870172\_annotated\_assembly\_genomic.fna\_16:258288-258369

Satlength=82 Nr of Repeats=4 RepeatLength=20 seed=TATCTACGAA Num.seqs=3

Similarity=0.777778

0

TATCTACG-AAA-ATACAGATA

Rev.of\_GCF\_900104555.1\_IMG-

taxon\_2651870172\_annotated\_assembly\_genomic.fna\_22:509247-509328

Satlength=82 Nr of Repeats=4 RepeatLength=20 seed=TTTCGTTAGAT Num.seqs=3

Similarity=0.777778

11

TATCTACG-AAATTTAAA-ATA

Rev.of\_GCF\_900104555.1\_IMG-

taxon\_2651870172\_annotated\_assembly\_genomic.fna\_22:513986-514066

Satlength=81 Nr of Repeats=4 RepeatLength=20 seed=TTCGTAGATA Num.seqs=4  
Similarity=0.636243 30 TATCTACG-AAATTTAGA-ATA  
Rev.of\_GCF\_000759675.1\_ASM75967v1\_genomic.fna\_19:516952-517036  
Satlength=85 Nr of Repeats=4 RepeatLength=21 seed=TATCTACACA Num.seqs=4  
Similarity=0.461353 0  
TA-CTACGAAAATGTGTAGATA

\*\* \*\*\*\*\* \*\* \* \* \*\*

Consensus:

TAtCTACGAAAttTanAgATA

>Bacillus\_Fam\_213\_21\_4 Nr. of seq. 4 Alignment length(with gaps) = 22  
Alignment score = 0.611111  
GCF\_000171615.1\_ASM17161v1\_genomic.fna\_75:39270-39436 Satlength=167 Nr of  
Repeats=7 RepeatLength=21 seed=TAAAAACAGA Num.seqs=5 Similarity=0.666667  
0 TAAAAACAGAAATGCAAGAGG-  
GCF\_001591425.1\_ASM159142v1\_genomic.fna\_42:3633-3717 Satlength=85 Nr of  
Repeats=4 RepeatLength=21 seed=ATGAAAGCAG Num.seqs=4 Similarity=0.724868  
10 -ACAAACTGAAATGAAAGCAGA  
GCF\_001591465.1\_ASM159146v1\_genomic.fna\_37:32146-32471 Satlength=326 Nr  
of Repeats=6 RepeatLength=21 seed=GAAATGAAAA Num.seqs=4  
Similarity=0.862434  
28 -ACAACAAGAAATGAAAAAAGA  
Rev.of\_GCF\_900109925.1\_IMG-  
taxon\_2651870116\_annotated\_assembly\_genomic.fna\_21:114898-115087  
Satlength=190 Nr of Repeats=8 RepeatLength=21 seed=TCTTGTTTCA Num.seqs=7  
Similarity=0.806500 42 -ACTACAAGAAATGAAACAAGA

\* \* \*\*\*\*\* \*\* \*

Consensus:

AcaAaaaGAAATGaAAgaaGa

>Bacillus\_Fam\_214\_22\_4 Nr. of seq. 4 Alignment length(with gaps) = 22  
Alignment score = 0.623737  
GCF\_000331575.1\_ASM33157v1\_genomic.fna\_1:1705037-1705121 Satlength=85 Nr  
of Repeats=4 RepeatLength=21 seed=ATTTATTGTC Num.seqs=4  
Similarity=0.548309  
0 ATTTATTGTCCGAAACAAGG-  
GCF\_000331575.1\_ASM33157v1\_genomic.fna\_4:111890-112405 Satlength=516 Nr  
of Repeats=18 RepeatLength=21 seed=TTTATTGTCC Num.seqs=13  
Similarity=0.806268 1  
TTTTATTGTCCGGAATCAAAT-  
Rev.of\_GCF\_001315045.1\_ASM131504v1\_genomic.fna\_25:44801-44885  
Satlength=85 Nr of Repeats=4 RepeatLength=21 seed=GGACAATAAA Num.seqs=4  
Similarity=0.453704 11  
ATTTATTGTCC-GATTCTAGTG  
GCF\_001315045.1\_ASM131504v1\_genomic.fna\_42:24951-25035 Satlength=85 Nr of  
Repeats=4 RepeatLength=21 seed=TTTATTGTCC Num.seqs=4 Similarity=0.420940  
22 -TTTATTGTCCAGATACTCATG

\*\*\*\*\* \*\* \*

Consensus:

aTTTATTGTCCgGAaaCaaatg

>Bacillus\_Fam\_215\_22\_4 Nr. of seq. 4 Alignment length(with gaps) = 22  
Alignment score = 0.694444  
GCF\_000401235.1\_BacNeaAAU1\_genomic.fna\_108:5084-5249 Satlength=166 Nr of  
Repeats=8 RepeatLength=21 seed=ATCAGCCAAA Num.seqs=5 Similarity=0.809524  
12 AATGAG-GGGGAAATCAGCCAA  
Rev.of\_GCF\_001591585.1\_ASM159158v1\_genomic.fna\_22:73236-73362  
Satlength=127 Nr of Repeats=6 RepeatLength=21 seed=TTTGGCTGAT Num.seqs=6  
Similarity=0.771717 21  
AGTGAGTGGGGAA-TCAGCCAA  
Rev.of\_GCF\_001591585.1\_ASM159158v1\_genomic.fna\_40:17715-17818  
Satlength=104 Nr of Repeats=5 RepeatLength=21 seed=TTTGGCTGAT Num.seqs=3  
Similarity=0.809524 22  
AGTAAG-ANGGAAATCAGCCAA  
Rev.of\_GCF\_001591585.1\_ASM159158v1\_genomic.fna\_3:180090-180216  
Satlength=127 Nr of Repeats=6 RepeatLength=21 seed=CTTTGGCTGA Num.seqs=6  
Similarity=0.839153 22  
AGCGGGGAGGGAA-TCAGCCAA

\*\*\*\*\* \* \*\*\*\*

Consensus:

aTCAGCCAAAgtgaGnagGGAA

>Bacillus\_Fam\_216\_22\_4 Nr. of seq. 4 Alignment length(with gaps) = 22  
Alignment score = 0.702020  
GCF\_000948175.1\_BFA\_2\_A\_genomic.fna\_31:29597-29723 Satlength=127 Nr of  
Repeats=6 RepeatLength=21 seed=ATCTCTCGGT Num.seqs=6 Similarity=0.911111  
0 ATCTCTCGGTTTTGCG-CTTTA  
GCF\_000948175.1\_BFA\_2\_A\_genomic.fna\_185:0-83 Satlength=84 Nr of Repeats=4  
RepeatLength=21 seed=AATCTCTCGG Num.seqs=4 Similarity=0.968254  
20 ATCTCTCGGTTTTGCG-CTTTA  
Rev.of\_GCF\_000948175.1\_BFA\_2\_A\_genomic.fna\_39:8694-8799 Satlength=106 Nr  
of Repeats=5 RepeatLength=21 seed=AAACCGAGAG Num.seqs=5  
Similarity=0.847619  
12 ATCTCTCGGTTT-GCGGGAATA  
GCF\_000948175.1\_BFA\_2\_A\_genomic.fna\_14:18049-18299 Satlength=251 Nr of  
Repeats=12 RepeatLength=21 seed=AATCTCTCGG Num.seqs=10  
Similarity=0.679461  
21 ATCTCTCGGTTTCGCGTCGNGA

\*\*\*\*\* \*\*\* \*

Consensus:

ATCTCTCGGTTTtGCGnctttA

>Bacillus\_Fam\_217\_22\_4 Nr. of seq. 4 Alignment length(with gaps) = 22  
Alignment score = 0.601010  
GCF\_001591485.1\_ASM159148v1\_genomic.fna\_6:6108-6192 Satlength=85 Nr of  
Repeats=4 RepeatLength=21 seed=TATTTGCGAA Num.seqs=4 Similarity=0.597884  
11 T-TAGCACCTTTTATTTGCGAA



Rev.of\_GCF\_001591665.1\_ASM159166v1\_genomic.fna\_53:38984-39068  
 Satlength=85 Nr of Repeats=4 RepeatLength=21 seed=ATTCGCAAAT Num.seqs=4  
 Similarity=0.735450 22  
 T-TGGGGGCGTTTATTTGCGAA  
 Rev.of\_GCF\_001591665.1\_ASM159166v1\_genomic.fna\_78:8523-8607 Satlength=85  
 Nr of Repeats=4 RepeatLength=21 seed=TTTCGCAAATA Num.seqs=4  
 Similarity=0.671958 20  
 TCTATGACGTTT-ATTTGCGAA  
 GCF\_001591805.1\_ASM159180v1\_genomic.fna\_15:21542-21647 Satlength=106 Nr  
 of Repeats=5 RepeatLength=21 seed=TTATTTGCGA Num.seqs=5  
 Similarity=0.683333  
 30 TCTAACNCTNTT-ATTTGCGAA

\*\*\*\*\* \* \*\*

Consensus:

tATTTGCGAATcTagcacctTT

>Bacillus\_Fam\_218\_20\_4 Nr. of seq. 4 Alignment length(with gaps) = 21  
 Alignment score = 0.669312  
 GCF\_001439915.1\_ASM143991v1\_genomic.fna\_94:254056-254153 Satlength=98 Nr  
 of Repeats=5 RepeatLength=19 seed=TTGCGCTTTA Num.seqs=3  
 Similarity=0.953216  
 0 TTGCG-CTTT-AGCCACATAT  
 GCF\_000153365.1\_ASM15336v1\_genomic.fna\_11:41215-41295 Satlength=81 Nr of  
 Repeats=4 RepeatLength=20 seed=TATATTTGCG Num.seqs=4 Similarity=0.648148  
 15 TTGCGAGTTT-CTCCATATAT  
 GCF\_000473245.1\_ASM47324v1\_genomic.fna\_1:3661356-3661436 Satlength=81 Nr  
 of Repeats=4 RepeatLength=20 seed=TATATTTGCG Num.seqs=4  
 Similarity=0.648148  
 15 TTGCGAGTTT-CTCCATATAT  
 Rev.of\_GCF\_001636315.1\_ASM163631v1\_genomic.fna\_1:2663845-2663929  
 Satlength=85 Nr of Repeats=4 RepeatLength=21 seed=TCGCAGATAT Num.seqs=4  
 Similarity=0.593434 26  
 CTGCGAGTTTAGTCAATATAT

\*\*\*\* \* \* \* \*

Consensus:

tTGCGagTTTctCcAtATAT

>Bacillus\_Fam\_219\_20\_4 Nr. of seq. 4 Alignment length(with gaps) = 21  
 Alignment score = 0.671958  
 GCF\_000401235.1\_BacNeaAAU1\_genomic.fna\_6:1275-1356 Satlength=82 Nr of  
 Repeats=4 RepeatLength=20 seed=ATGATCCAAA Num.seqs=3 Similarity=0.822222  
 0 ATGATCCAAA-ATCAAATAT  
 GCF\_900094975.1\_IMG-  
 taxon\_2617270721\_annotated\_assembly\_genomic.fna\_9:33588-33669  
 Satlength=82 Nr of Repeats=4 RepeatLength=20 seed=TATTATCAAA Num.seqs=3  
 Similarity=0.644444 19 ATTATCAAAA-  
 NNCAATTAT  
 GCF\_900094975.1\_IMG-  
 taxon\_2617270721\_annotated\_assembly\_genomic.fna\_9:41410-41491  
 Satlength=82 Nr of Repeats=4 RepeatLength=20 seed=TATTATCAAA Num.seqs=3

Similarity=0.666667

19 ATTATCAAAAA-

TNGAATTAT

GCF\_001877785.1\_PlanoSAMM\_genomic.fna\_74:382717-382798 Satlength=82 Nr of  
Repeats=4 RepeatLength=20 seed=TATTATCAAA Num.seqs=3 Similarity=0.603175  
19 ATTATCAAAAACAAGNATTAT

\*\* \*\*\* \*\*

Consensus:

ATtATCaAAAAanCaAtTAT

>Bacillus\_Fam\_220\_21\_4 Nr. of seq. 4 Alignment length(with gaps) = 21

Alignment score = 0.625661

GCF\_000429705.1\_ASM42970v1\_genomic.fna\_2:37535-37615 Satlength=81 Nr of  
Repeats=4 RepeatLength=20 seed=AATTGGCGGA Num.seqs=4 Similarity=0.805556  
0 AATTGGCGGAGTTATTTATG-

Rev.of\_GCF\_000307875.1\_BABA1.0\_genomic.fna\_7:97-181 Satlength=85 Nr of  
Repeats=4 RepeatLength=21 seed=ATTCCGCCAA Num.seqs=4 Similarity=0.571256  
12 AGTTGGCGGAATTACTTNTGA

GCF\_001591665.1\_ASM159166v1\_genomic.fna\_21:113671-113776 Satlength=106 Nr  
of Repeats=4 RepeatLength=21 seed=TTGGCGGAAT Num.seqs=3  
Similarity=0.505050 23

ATTTGGCGGAATTANTGGCGA

Rev.of\_GCF\_000948175.1\_BFA\_2\_A\_genomic.fna\_71:44838-44964 Satlength=127

Nr of Repeats=5 RepeatLength=21 seed=AACTCCGTAA Num.seqs=4

Similarity=0.548309 4

AGTTCGCGGTNTTATTTACGG

\* \*\* \*\*\*\* \*\*\* \*

Consensus:

AgTTgGCGGaaTTAtTtacGa

>Bacillus\_Fam\_221\_21\_4 Nr. of seq. 4 Alignment length(with gaps) = 21

Alignment score = 0.634921

GCF\_000181495.1\_ASM18149v1\_genomic.fna\_184:58106-58409 Satlength=304 Nr  
of Repeats=5 RepeatLength=21 seed=ACTCGTCGAT Num.seqs=3  
Similarity=0.787879

0 ACTCGTCGATAGAACCGCAAN

GCF\_001591445.1\_ASM159144v1\_genomic.fna\_34:15168-15252 Satlength=85 Nr of  
Repeats=4 RepeatLength=21 seed=CGCCAATAGA Num.seqs=4 Similarity=0.724868  
3 ATTCGCCAATAGAACCGCAA

Rev.of\_GCF\_001274935.1\_ASM127493v1\_genomic.fna\_37:44679-44969

Satlength=291 Nr of Repeats=7 RepeatLength=21 seed=TTCTATCGAT Num.seqs=5  
Similarity=0.733333 14

ANTGATCGATAGAAAAGCAA

GCF\_001439635.1\_ASM143963v1\_genomic.fna\_74:26703-26787 Satlength=85 Nr of  
Repeats=4 RepeatLength=21 seed=TGACGGATAG Num.seqs=4 Similarity=0.733586  
23 ACTGACGGATAGAACTCAA

\* \* \*\*\*\*\* \*\*

Consensus:

AcTcaccgATAGAAacgCAaA

>Bacillus\_Fam\_222\_21\_4 Nr. of seq. 4 Alignment length(with gaps) = 21  
Alignment score = 0.701058  
GCF\_000508325.1\_BAVI\_1\_genomic.fna\_8:57470-57985 Satlength=516 Nr of  
Repeats=16 RepeatLength=21 seed=TGTCGTAAAGT Num.seqs=10  
Similarity=0.553704  
0 TGTCGTAAAGTGTGCGAAAAATN  
Rev.of\_GCF\_001591665.1\_ASM159166v1\_genomic.fna\_65:32-187 Satlength=156 Nr  
of Repeats=6 RepeatLength=21 seed=ACTTACGACA Num.seqs=5  
Similarity=0.809524 10  
TGTCGTAAAGTGGCTGAAAATA  
GCF\_001591665.1\_ASM159166v1\_genomic.fna\_77:44-199 Satlength=156 Nr of  
Repeats=6 RepeatLength=21 seed=TGTCGTAAAGT Num.seqs=5 Similarity=0.765079  
21 TGTCGTAAAGTNGCTGAAAATG  
GCF\_001591445.1\_ASM159144v1\_genomic.fna\_24:47680-47785 Satlength=106 Nr  
of Repeats=5 RepeatLength=21 seed=ATGTAATAAG Num.seqs=5  
Similarity=0.713636  
20 TGTAAATAAGNNTCCGAAAATA

\*\*\* \*\*\*\* \* \*\*\*\*\*

Consensus:

TGTcgTAAGtggCtgAAAATa

>Bacillus\_Fam\_223\_21\_4 Nr. of seq. 4 Alignment length(with gaps) = 21  
Alignment score = 0.666667  
GCF\_000508325.1\_BAVI\_1\_genomic.fna\_47:49007-49090 Satlength=84 Nr of  
Repeats=4 RepeatLength=21 seed=TATCAGCGAA Num.seqs=3 Similarity=0.545455  
0 TATCAGCGAATNTNCACNATA  
GCF\_000508325.1\_BAVI\_1\_genomic.fna\_89:42322-42405 Satlength=84 Nr of  
Repeats=4 RepeatLength=21 seed=TATCAGCGAA Num.seqs=3 Similarity=0.682540  
0 TATCAGCGAATCTAANCAATA  
GCF\_001591445.1\_ASM159144v1\_genomic.fna\_67:12088-12172 Satlength=85 Nr of  
Repeats=4 RepeatLength=21 seed=TTCTATCAGC Num.seqs=4 Similarity=0.767196  
18 TATCAGCGAATTTAACCATT  
Rev.of\_GCF\_000508325.1\_BAVI\_1\_genomic.fna\_95:8292-8375 Satlength=84 Nr of  
Repeats=4 RepeatLength=21 seed=CGCTGATAAA Num.seqs=3 Similarity=0.565657  
8 TATCAGCGNATTTCCGCANTT

\*\*\*\*\* \*\* \* \* \*

Consensus:

TATCAGCGaAtTtAanCaaTa

>Bacillus\_Fam\_224\_21\_4 Nr. of seq. 4 Alignment length(with gaps) = 21  
Alignment score = 0.724868  
GCF\_000508325.1\_BAVI\_1\_genomic.fna\_48:140-287 Satlength=148 Nr of  
Repeats=7 RepeatLength=21 seed=TTTACTGTCC Num.seqs=7 Similarity=0.611833  
0 TTTACTGTCCACTTCTGNCCA  
Rev.of\_GCF\_001591665.1\_ASM159166v1\_genomic.fna\_53:13657-14008  
Satlength=352 Nr of Repeats=10 RepeatLength=21 seed=GGACAGTAAA  
Num.seqs=7 Similarity=0.608225  
10 TTTACTGTCCACTTTTANNCA

Rev.of\_GCF\_001591805.1\_ASM159180v1\_genomic.fna\_27:47504-47609  
Satlength=106 Nr of Repeats=5 RepeatLength=21 seed=GGACAGTAAA Num.seqs=5  
Similarity=0.571014 10

TTTACTGTCCGGTTTTANCNA

GCF\_001591805.1\_ASM159180v1\_genomic.fna\_35:13044-13128 Satlength=85 Nr of  
Repeats=4 RepeatLength=21 seed=TCCGGTTTTG Num.seqs=4 Similarity=0.767196  
28 TTTACTGTCCGGTTTTGACGA

\*\*\*\*\* \*\* \*

Consensus:

TTTACTGTCCacTTtTancca

>Bacillus\_Fam\_225\_20\_4 Nr. of seq. 4 Alignment length(with gaps) = 20  
Alignment score = 0.666667

GCF\_000181495.1\_ASM18149v1\_genomic.fna\_104:725-825 Satlength=101 Nr of  
Repeats=5 RepeatLength=20 seed=TTATCGGCGA Num.seqs=5 Similarity=0.682540  
0 TTATCGGCGATTTCTGAATT

Rev.of\_GCF\_001636335.1\_ASM163633v1\_genomic.fna\_1:1148631-1149011

Satlength=381 Nr of Repeats=19 RepeatLength=20 seed=TCGCAAATAA

Num.seqs=17 Similarity=0.694742

10 TTATTTGCGATTTTCNNATTT

GCF\_001712755.1\_ASM171275v1\_genomic.fna\_23:187080-187438 Satlength=359 Nr  
of Repeats=17 RepeatLength=20 seed=TTTATTTGCG Num.seqs=13

Similarity=0.688441

19

TTATTTGCGATTNCTGATAT

GCF\_001645685.2\_ASM164568v2\_genomic.fna\_1:4106820-4106922 Satlength=103

Nr of Repeats=5 RepeatLength=20 seed=TTTATCTAC Num.seqs=3

Similarity=0.735450

18

TTATCTACGAATTCTGCNTT

\*\*\*\* \* \* \*

Consensus:

TTATctgCGAtTtCtgattT

>Bacillus\_Fam\_226\_20\_4 Nr. of seq. 4 Alignment length(with gaps) = 20  
Alignment score = 0.788889

GCF\_001648575.1\_ASM164857v1\_genomic.fna\_58:901-1002 Satlength=102 Nr of  
Repeats=4 RepeatLength=20 seed=TTTCAGGATA Num.seqs=3 Similarity=0.636364  
0 TTTCAGGATAAATCCCAAAA

Rev.of\_GCF\_001648575.1\_ASM164857v1\_genomic.fna\_61:70721-70900

Satlength=180 Nr of Repeats=8 RepeatLength=20 seed=TTATCCTGAA Num.seqs=6

Similarity=0.630688

11

TTTCAGGATAAATCCGAAAT

Rev.of\_GCF\_001648575.1\_ASM164857v1\_genomic.fna\_67:67316-67396

Satlength=81 Nr of Repeats=4 RepeatLength=20 seed=TTTATCCTGA Num.seqs=4

Similarity=0.805556

12

ATTTCAGGATAAATCTCAAAA

Rev.of\_GCF\_001877785.1\_PlanoSAMM\_genomic.fna\_150:75986-76073 Satlength=88

Nr of Repeats=4 RepeatLength=20 seed=TTTATGCTGA Num.seqs=3

Similarity=0.555556

12

ATTTCAGCATAAATCTAAAAA

\*\*\*\*\* \*\*\*\*\* \*\*\*

Consensus:

aTTCAGgATAAATCccAAAa

>Bacillus\_Fam\_227\_18\_4 Nr. of seq. 4 Alignment length(with gaps) = 19  
Alignment score = 0.688596  
GCF\_000161455.1\_ASM16145v1\_genomic.fna\_1:2935090-2935216 Satlength=127 Nr  
of Repeats=6 RepeatLength=18 seed=TCGCCTTGAG Num.seqs=5  
Similarity=0.837037 0  
TCGCCTTGAGGTCCTGGT-  
GCF\_000299035.1\_ASM29903v1\_genomic.fna\_1:825324-826476 Satlength=1153 Nr  
of Repeats=60 RepeatLength=18 seed=CCTTGTTTCGC Num.seqs=49  
Similarity=0.850214 12  
TCGCCCTGAGGTCCTTGT-  
GCF\_000334155.1\_L1\_genomic.fna\_44:19664-22112 Satlength=2449 Nr of  
Repeats=125 RepeatLength=18 seed=TGAGGCCCTT Num.seqs=117  
Similarity=0.883486  
6 TCNCCTTGAGGCCCTTGT-  
Rev.of\_GCF\_002019665.1\_ASM201966v1\_genomic.fna\_1:1011858-1012110  
Satlength=253 Nr of Repeats=9 RepeatLength=18 seed=GGTCCACAAG Num.seqs=6  
Similarity=0.886420 14  
TCTCCTTGTTGGACCT-GTT

\*\* \*\* \* \* \* \* \*

Consensus:

TCgCctTGaGGtCCTtGT

>Bacillus\_Fam\_228\_18\_4 Nr. of seq. 4 Alignment length(with gaps) = 18  
Alignment score = 0.641975  
GCF\_000008505.1\_ASM850v1\_genomic.fna\_1:2327569-2327767 Satlength=199 Nr  
of Repeats=9 RepeatLength=18 seed=GTGATGCCTG Num.seqs=7  
Similarity=0.922399  
0 GTGATGCCTGTAGGACCA  
Rev.of\_GCF\_001587375.1\_ASM158737v1\_genomic.fna\_6:3784-4054 Satlength=271  
Nr of Repeats=15 RepeatLength=18 seed=CCTACTGGCG Num.seqs=15  
Similarity=0.882892 14  
GTTACGCCAGTAGGTCCA  
Rev.of\_GCF\_001645555.1\_ASM164555v1\_genomic.fna\_12:312575-312683  
Satlength=109 Nr of Repeats=6 RepeatLength=18 seed=TTACTGGACC Num.seqs=6  
Similarity=0.885965 4  
GTAATACCTGTGGGTCCA  
Rev.of\_GCF\_900096965.1\_IMG-  
taxon\_2671180223\_annotated\_assembly\_genomic.fna\_22:69506-70175  
Satlength=670 Nr of Repeats=15 RepeatLength=18 seed=ACTGGTGCTA  
Num.seqs=14 Similarity=0.797667 2 GTGACCCCGGTAGCACCA

\*\* \* \* \* \* \*

Consensus:

GTgAcgCCtGTaGgACCA

>Bacillus\_Fam\_229\_18\_4 Nr. of seq. 4 Alignment length(with gaps) = 18  
Alignment score = 0.716049  
GCF\_000177235.2\_ASM17723v2\_genomic.fna\_1:713412-713628 Satlength=217 Nr  
of Repeats=11 RepeatLength=18 seed=CCAGGAGAAC Num.seqs=10  
Similarity=0.899588 0  
CCAGGAGAACCAAGTGAC  
GCF\_900096965.1\_IMG-  
taxon\_2671180223\_annotated\_assembly\_genomic.fna\_7:2615-2903 Satlength=289  
Nr of Repeats=15 RepeatLength=18 seed=CCAGGAGATC Num.seqs=12  
Similarity=0.841751 0 CCAGGAGATCCGGGCGAC  
Rev.of\_GCF\_001887185.1\_ASM188718v1\_genomic.fna\_2:899-971 Satlength=73 Nr  
of Repeats=4 RepeatLength=18 seed=TTGCTTGGAT Num.seqs=4  
Similarity=0.802469  
17 CCAGGGGATCCAAGCAAA  
Rev.of\_GCF\_001887185.1\_ASM188718v1\_genomic.fna\_105:8418-8580  
Satlength=163 Nr of Repeats=9 RepeatLength=18 seed=TTGCTTGGAT Num.seqs=9  
Similarity=0.823045 17  
CCAGGAGATCCAAGCAAA

\*\*\*\*\* \*\* \* \*

Consensus:

CCAGGaGAtCCaaGcaAa

>Bacillus\_Fam\_230\_18\_4 Nr. of seq. 4 Alignment length(with gaps) = 18  
Alignment score = 0.864198  
GCF\_000526655.1\_ASM52665v1\_genomic.fna\_3:175348-175420 Satlength=73 Nr of  
Repeats=4 RepeatLength=18 seed=AGACCATTCG Num.seqs=4 Similarity=0.864198  
0 AGACCATTCGGGTTTGGC  
GCF\_000724485.1\_ASM72448v1\_genomic.fna\_1:630902-631064 Satlength=163 Nr  
of Repeats=9 RepeatLength=18 seed=GACCATTTGG Num.seqs=9  
Similarity=0.925926  
1 AGACCATTTGGTTTTGGC  
Rev.of\_GCF\_000724485.1\_ASM72448v1\_genomic.fna\_1:2776674-2776836  
Satlength=163 Nr of Repeats=9 RepeatLength=18 seed=GCCAAAACCA Num.seqs=9  
Similarity=0.946502 18  
AGACCATTTGGTTTTGGC  
GCF\_001273755.1\_ASM127375v1\_genomic.fna\_17:1520653-1520719 Satlength=67  
Nr of Repeats=4 RepeatLength=18 seed=ATTTGGATTT Num.seqs=3  
Similarity=0.901235 5  
AGACCATTTGGATTTGGG

\*\*\*\*\* \*\* \*\*\*\*\*

Consensus:

AGACCATTTtGGtTTTGGc

>Bacillus\_Fam\_231\_15\_4 Nr. of seq. 4 Alignment length(with gaps) = 15  
Alignment score = 0.700000  
GCF\_000175075.1\_ASM17507v1\_genomic.fna\_36:203990-204113 Satlength=124 Nr  
of Repeats=4 RepeatLength=15 seed=ACCAAAACAA Num.seqs=3  
Similarity=0.881481  
0 ACCAAAACAAGAAGC

Rev.of\_GCF\_000299035.1\_ASM29903v1\_genomic.fna\_4:202303-202378  
 Satlength=76 Nr of Repeats=5 RepeatLength=15 seed=TTAGGCTCTT Num.seqs=5  
 Similarity=0.756250 6  
 GCCTAANAAAGAAGA  
 GCF\_000724485.1\_ASM72448v1\_genomic.fna\_1:1494972-1495197 Satlength=226 Nr  
 of Repeats=15 RepeatLength=15 seed=CGAAAAAAGC Num.seqs=15  
 Similarity=0.925503 17  
 ACCGAAAAAGCAGA  
 GCF\_000724485.1\_ASM72448v1\_genomic.fna\_1:1494984-1495281 Satlength=298 Nr  
 of Repeats=20 RepeatLength=15 seed=AACCGAAAAA Num.seqs=17  
 Similarity=0.901961 29  
 ACCGAAAAAGCAGA

\*\* \*\* \*\*\* \*\*

Consensus:

aCCgAAaaAGaAGa

>Bacillus\_Fam\_232\_12\_4 Nr. of seq. 4 Alignment length(with gaps) = 12  
 Alignment score = 0.888889  
 GCF\_000153365.1\_ASM15336v1\_genomic.fna\_71:47849-47909 Satlength=61 Nr of  
 Repeats=5 RepeatLength=12 seed=GGCAACGGCA Num.seqs=5 Similarity=0.866667  
 0 GGCAACGGCAAT  
 GCF\_000473245.1\_ASM47324v1\_genomic.fna\_1:3082960-3083020 Satlength=61 Nr  
 of Repeats=5 RepeatLength=12 seed=GGCAACGGCA Num.seqs=5  
 Similarity=0.866667  
 0 GGCAACGGCAAT  
 Rev.of\_GCF\_001712755.1\_ASM171275v1\_genomic.fna\_1:111557-111623  
 Satlength=67 Nr of Repeats=5 RepeatLength=12 seed=TTGCCATTAC Num.seqs=4  
 Similarity=1.000000 5  
 GGCAACGGTAAT  
 GCF\_900156865.1\_PRJEB18960\_genomic.fna\_3:344931-345015 Satlength=85 Nr of  
 Repeats=7 RepeatLength=12 seed=GGCAACGGCA Num.seqs=7 Similarity=0.820106  
 0 GGCAACGGCAAC

\*\*\*\*\* \*\*

Consensus:

GGCAACGGcAAt

>Bacillus\_Fam\_233\_234\_3 Nr. of seq. 3 Alignment length(with gaps) = 234  
 Alignment score = 0.864198  
 GCF\_000169195.2\_ASM16919v2\_genomic.fna\_1:908315-909719 Satlength=1405 Nr  
 of Repeats=6 RepeatLength=234 seed=CCAAAACAAC Num.seqs=6  
 Similarity=0.860589 0  
 CCAAAAACAACGACGAAGTATGTCAATGTGGACAAAGGCTCCCATTTAATATTGCGCTCNAAGCCTCCACTTC  
 GTCCAGCATTTTAGCAAGCTTGGCAAGAGGAGAAAAAGTGACGGTTTACTCCATTTCCGGGGATTGGGCAAAA  
 GTAAAAGCCGGGAGCAAAACGGGCTATGTTTCATGCATCTTTTGGCGAACTCAAATCCCACAGCAATGCAG  
 AACTTCTACTCCGG  
 Rev.of\_GCF\_000217835.1\_ASM21783v1\_genomic.fna\_1:416000-417405  
 Satlength=1406 Nr of Repeats=6 RepeatLength=234 seed=ACATTGACAT  
 Num.seqs=5 Similarity=0.718207  
 28  
 CCAAAAACAACGACGAAGTATGTCAATGTGGATAAAGGNTCCCATTTAATATTACGTTCGAAAGCCTCCAAAAAC

GTCCAGCATTTTtagcaagCTTGGCAAGAGGNAAAAAGTGACGGTTTACTCTATTTCCGGGGANTGGGCAAAA  
GTAAAAGCCGGGAGCAAAACGGGCTATGTTTCATGCATCTTTTTTGACGAACTCAAATCCCgATAGCAATGCAG  
GCACTTCAACCCCAAG

Rev.of\_GCF\_000832905.1\_ASM83290v1\_genomic.fna\_1:2760090-2761260

Satlength=1171 Nr of Repeats=5 RepeatLength=234 seed=TTTTTCGCCTC

Num.seqs=5 Similarity=0.877637

109

CCAAAACAACGACGAAGTATGTCAATGTGGATAAGGGTTCACATCTAATCTTACGTTCAAAGCCTCCGAAAC  
GTCCAGCATTTTGGACAGCTTGCCAAGAGGCGAAAAGGTGACGGTGACTCTATTTCCGGGGACTGGGCGAAA  
GTAAAAGCCGGCAGCAAAACGGGCTATGTTTCATGCATCTTTTTTGCGGAATTCAAATCCTGATAGCAGTGCAG  
ATACTTCTACTCCAG

\*\*\*\*\*  
\*\*\*\*\*  
\*\*\*\*\*  
\*\*\*\*\*

Consensus:

CCAAAACAACGACGAAGTATGTCAATGTGGATAAaGGnTCCcATtTAATaTTaCGtTCnAAAGCCTCCaaaaC  
GTCCAGCATTTTaGcaAGCTTGgCAAGAGGngAAAAaGTGACGGTtTACTCtATTTCCGGGGAnTGGGCaAAA  
GTAAAAGCCGGgAGCAAAACGGGCTATGTTTCATGCATCTTTTTTGgCGAAcTCAAATCCcGAtAGCAaTGCAG  
acACTTCTACTCCaG

>Bacillus\_Fam\_234\_213\_3 Nr. of seq. 3 Alignment length(with gaps) = 222

Alignment score = 0.719720

GCF\_001420645.1\_ASM142064v1\_genomic.fna\_7:2736-4618 Satlength=1883 Nr of  
Repeats=10 RepeatLength=213 seed=TTAAACCTTC Num.seqs=7

Similarity=0.788528

0

TTAAACCTTCGGTCGGGTGCTGGCACGTCTCATCGNGTTTTAACGACCCTTCCTGTTGGACAGAAGCTTGAGC  
TTCTTCAAAAACAAGGCAATTGGTATCAAGTTAAAGCTGGTAACCAAACCTGGCTGGGTCTCCGCTGATTTTCAT  
TAAAACAAATGGTAATAATGTCGAAGACAA-----CAAGC--  
CTTCTCTTGGCTCTGCGACGACTACAGCTCGC

Rev.of\_GCF\_002019765.1\_ASM201976v1\_genomic.fna\_1:1075884-1077375

Satlength=1492 Nr of Repeats=8 RepeatLength=213 seed=CGAAGGTTTA

Num.seqs=6 Similarity=0.765152

11

TTAAACCTTCGGTCGGGTGCTGGTACGTCTCATCGNGTTTTAACGACTCTTCCGGTTGGACAGAAGCTTGAGC  
TTCTTCAAAAACAAGGCAATTGGTATCAAGTTAAAGCTGGTAACCAAACCTGGCTGGGTTTCTGCTGATTTTCAT  
TAAAACAGATGGTAATAATGTCGAAGACAA-----CAAGC--  
CTTCTCTTGGCTCTGCGACGACTACAGCTCGC

GCF\_002019705.1\_ASM201970v1\_genomic.fna\_1:1608983-1610081 Satlength=1099

Nr of Repeats=5 RepeatLength=219 seed=TGGTATCAAG Num.seqs=3

Similarity=0.861999

93

TTAAACTTGCGCACTGGGGCTGGCACAAACCACCGTATTATTACAACGCTACCTGTTGGGCAAAAGCTGGAAC  
TTCTTAAAAAAGAAGGCAATTGGTATCAAGTTAAAGCCGGGTCTCATACGGGATGGGTTTCTGCTGACTTTAT  
TAAATCTGACGGCAAT--GGTGAAG-  
CAATGTCGGGCAATCTTCTTCTATCGGCTCTGCCACTACCACTGCTCGC

\*\*\*\*\*  
\*\*\*\*\*  
\*\*\*\*\*  
\*\*\*\*\*

Consensus:



TTAAACcTtCGgtCgGGtGCTGGcACgtctCatCGngTTtTaACgACnCTtCctGTTGGaCAGAGCTtGAgC  
TTCTTcAAAAAcAAGGCAATTGGTATCAAGTTAAAGCtGGtaacCAaActGGcTGGGTtTctGCTGAtTTcAT  
TAAaAaCagAtGGtAATaatGTcGAAGaCAACAAGCCTTCTcTtGGCTCTGCgACgActACaGCTCGC

>Bacillus\_Fam\_235\_166\_3 Nr. of seq. 3 Alignment length(with gaps) = 168  
Alignment score = 0.659392

GCF\_001742425.1\_ASM174242v1\_genomic.fna\_64:52962-53922 Satlength=961 Nr  
of Repeats=5 RepeatLength=159 seed=CTTGATTCTGT Num.seqs=4  
Similarity=0.724668

0 CTTGA-TTC-GTTCCCTATATTCCCGTCCCCAAGCTGACCATAATAGTT--  
ACTTCCCCACGCATACATCGTTCCATCACTTGCTAATGCTACTGAGTGAAAGATTCTACAGCTACTTGTTTCG  
ATCTTGGCTCCTTCGGGCATTGTGATCGCTGTGCGGACTAG----

GCF\_001742425.1\_ASM174242v1\_genomic.fna\_64:66225-67212 Satlength=988 Nr  
of Repeats=6 RepeatLength=165 seed=CCATCACTTG Num.seqs=4  
Similarity=0.642857

71 AATAACTCCANATCCACTATCCCGTCTCCCAACTGACCAAAATCGTT--  
NTCNTCCCCACGTATACAACGTCCCATCACTTGCTAACGCTATTGTATGATCTCCCCCTGCTGTTACTTGTTTC  
GATACTGGCTCCTCCGGGGATCGAAATCGCTATCGGACTAGCTTG

GCF\_001742425.1\_ASM174242v1\_genomic.fna\_64:68080-68896 Satlength=817 Nr  
of Repeats=5 RepeatLength=165 seed=CATCACTTGC Num.seqs=4  
Similarity=0.742275

72 ATCAACTCCCCATCCACTATTACCGTCTCCCAGCTGACC-  
ANATCGTTATTTCTCCCCACGTATACACCGTTCATCACTTGCTAACGCTACTGTGTGGGCAAATCCTGCCG  
ATACTTGTTTCGATCTTGCTCCTCCAGGGATAGGGATCACTGTGCGGACTAGATTG

\* \* \*      \*\*\*    \*\*\*    \*\*\*\*\*    \*    \*\*\*\*\*    \*    \*\*\*\*\*    \*\*\*\*\*    \*\*\*  
\*\*\*\*\*    \*\*\*\*\*    \*\*    \*\*                \*\*\*    \*    \*\*\*\*\*    \*\*\*\*\*    \*    \*\*    \*  
\*\*\*    \*\*    \*\*\*\*\*

Consensus:

attaAcTcCnnaTCCacTATtcCCGTctCCcAgCTGACCaaaATcGTTntCttCCCCACgtATACAnCGTtCC  
ATCACTTGCTAAcGCTAcTgtgTGancnantCCTgCnGnTACTTGTTTCGATctTGGCTCCTcCgGGgATnGng  
ATCgCTgTTCGGACTAGnttg

>Bacillus\_Fam\_236\_151\_3 Nr. of seq. 3 Alignment length(with gaps) = 159  
Alignment score = 0.705101

GCF\_001636425.1\_ASM163642v1\_genomic.fna\_1:3237226-3237826 Satlength=601  
Nr of Repeats=4 RepeatLength=150 seed=GCCGATGACC Num.seqs=4  
Similarity=0.986667

GCCGATGACCAAGGTGCTTCCTCTTTTC--  
TCTGTCTAGCTCCACGCGCTATCGGCTAGCGGATTTCTCCGTCTCCTCCCTACGATAAGTCAACATCAGCTC-  
---GT-CCCTCGCTGTGT-TTCCTTTATCTCAGTCGTAGATTCTGAAATCCGTAC

GCF\_001636425.1\_ASM163642v1\_genomic.fna\_1:571154-571780 Satlength=627 Nr  
of Repeats=4 RepeatLength=157 seed=CTCGCTGTGT Num.seqs=3  
Similarity=1.000000

GCCGATGAGCAAGGCGCTTGTGCTTTTCT--  
TCTGTCTAGCTCCAGCGCGCTATCGGCTAGCGGATTTCTACGTCTTCTCCCTGCGATAAGTCAACATCAGCTCG  
TGAGTGACCTCGCTGTGTGTCGTCCTTTATCTCAGTCGAAGACTCTGAAATCCGTAC

GCF\_001636425.1\_ASM163642v1\_genomic.fna\_1:4465616-4467134 Satlength=1519  
Nr of Repeats=10 RepeatLength=152 seed=AGCTCCAGCG Num.seqs=8  
Similarity=1.000000

GCCGATCACGAAGCTCCTCCCGTCTTTCTGAT-

37

TGTCTAGCTCCAGCGCCTATCGGCTCGCGGGCTTCTCCGTCTCCTCCCTGCGATAAGGCAACATCAGCTC---  
-GT-ACCTCGCTGTGT-ATCCTTGATCTCAGGCCACCCCTACGGTACCCGCAC

\*\*\*\*\* \* \*\*\* \*\* \*\*\*\* \* \*\*\*\*\* \*\*\*\*\* \*\* \* \*\*\*\*\*  
\*\*\*\*\* \*\*\*\*\* \*\*\*\*\* \*\*\*\*\* \*\* \*\*\*\*\* \*\*\*\*\* \* \*  
\* \* \* \* \*

Consensus:

GCCGATgAccAAGgtgCTtccgctTTTCTtTcTGTCTAGCTCCAgCGCCTATCGGCTaGCgGatTTCTtCGTCT  
cCTCCCTgCGATAAGtCAACATCAGCTCGTaCCTCGCTGTGTnTCCTTtATCTCAGtCgnAgacTctGaaAtC  
CGtAC

>Bacillus\_Fam\_237\_144\_3 Nr. of seq. 3 Alignment length(with gaps) = 148  
Alignment score = 0.644895

GCF\_000474275.1\_Bmar1.0\_genomic.fna\_56:91616-92192 Satlength=577 Nr of  
Repeats=4 RepeatLength=144 seed=TTGGTGGGACG Num.seqs=4  
Similarity=0.470569

0 -TTGGTGGGACGGCTGAAGGTGGAGCAGGTGGGAAAATCTTGGCGCGCCGCAAGGNNGA-  
TTGAAGGCTCNGCC--GAGCTGTCNTCATGGGCACCAAATCGTATCGACTGCTTTGTTCAG-  
GGAGCGTAATAATCAGATGTGGCATAAA

GCF\_000005825.2\_ASM582v2\_genomic.fna\_1:430629-431349 Satlength=721 Nr of  
Repeats=5 RepeatLength=144 seed=TGTGGCATAA Num.seqs=5  
Similarity=0.515711

133 -  
TTGGTGGGACGGNCGCAGATGGAGCGANTGGGAAAATCTNNGTTTACCGCAAGGAGGATTTGATGGCTC-  
GCCAGGTGCTGTC-TCNTGGGGNCCAAATCGNATCGACTGTTTTGTTCAG-  
GGGAAGAAATAATCANATGTGGCATAAA

Rev.of GCF\_000175075.1\_ASM17507v1\_genomic.fna\_4:29270-29846 Satlength=577  
Nr of Repeats=4 RepeatLength=144 seed=TTGTGCCACA Num.seqs=4  
Similarity=0.519371

0  
ATGGTGGGATGGACAACGTTGGAGTCAGTGGGAGAATCTTGGTTCCCCACGTGGTGGCTTTGAAGGTNC-  
GCCAGCTGCAGTT-TCATGGGGAGCAAATCGNATCGACTGTTTTGTAAGAGGGATG-  
NACAAGCGCATGTGGCACAA-

\*\*\*\*\* \*\* \* \*\*\*\*\* \*\*\*\*\* \*\*\*\*\* \* \* \* \* \* \* \* \* \* \* \* \* \* \* \*  
\*\* \*\* \* \* \* \* \* \* \* \* \* \* \* \* \* \* \* \* \* \* \* \* \* \* \* \* \* \* \* \* \*

Consensus:

TTGGTGGGAcGGncgaaGnTGGAGcnagTGGGAaAATCTtGGttCnCCgCaaGGnGGatTTGAaGGctCGCCag  
gtGcTGTcTCaTGGGgacCAAATCGnATCGACTGtTTTGTcAGGGganGnaAtAAtCanATGTGGCAtAAa

>Bacillus\_Fam\_238\_122\_3 Nr. of seq. 3 Alignment length(with gaps) = 125  
Alignment score = 0.682667

GCF\_000299035.1\_ASM29903v1\_genomic.fna\_4:356724-357203 Satlength=480 Nr  
of Repeats=4 RepeatLength=122 seed=GGCTCGTTCA Num.seqs=3  
Similarity=0.985428

0 GGCTCGTTCAGAATGGGAGGAGGATGGAGCT-TCTGCCGTAGAGGCGCTTTTTGCCTCGTAGGA-  
AGACGCGAAGCCACCGACCGTTCTTGCCCCTGGAGCTGGATATC-TTTAAAAGCGGAATT

GCF\_000831065.1\_ASM83106v1\_genomic.fna\_1:4750262-4750754 Satlength=493 Nr  
of Repeats=4 RepeatLength=123 seed=AAAAGCGAAA Num.seqs=4  
Similarity=0.813333

111  
GGCTCGCTCAGAATGTGAGGTGGATGGAGCT-TCTGACCTTGAGGCGCTTTTGCCTCTGGGGA-  
AGAAGCGAAGCCGCCGAACATTCTAGCCACTGTAGCTGGATTCCAATTAAAAGCGAAAGT

Rev.of\_GCF\_000775975.1\_ASM77597v1\_genomic.fna\_1:4477828-4478573  
Satlength=746 Nr of Repeats=6 RepeatLength=122 seed=GAGCCGCTTC  
Num.seqs=4 Similarity=0.798387  
5 GGCTCGCTCAGAATCGCAGGACATTGGAGCTCTC-  
GACCTTGAAGCGCTTTTTCGCTTCGAGCGAGAGA-  
GCGAAATGACCGGAGATTCTAGCCACTGGAGCTGGATATC-ATTAAAAGCGGAAGC

\*\*\*\*\*  
\*\*\*\*\*

Consensus:

GGCTCGcTCAGAATgggAGGaggaTGGAGCTTcTgACcTtGAgGCGCTtTTTGcTCgnggGAAGAnGCGAAg  
ccaCCGaacaTTCTaGCCaCTGgAGCTGGATatCaTTAAAAGCGgAAgt

>Bacillus\_Fam\_239\_104\_3 Nr. of seq. 3 Alignment length(with gaps) = 104  
Alignment score = 0.978632  
GCF\_001420645.1\_ASM142064v1\_genomic.fna\_41:140954-141471 Satlength=518 Nr  
of Repeats=5 RepeatLength=103 seed=ATGCTAGAAA Num.seqs=3  
Similarity=0.870550  
ATGCTAGAAACTGATTCAAAGCTTGAACAAGAATATCTGTAAACATAAGATCCACCTCCAGTTTGAAAATAA  
GGAAAAA-AGAATTAGCCAAGAGTGCCGATA  
Rev.of\_GCF\_000706725.1\_ASM70672v1\_genomic.fna\_1:3741837-3742252  
Satlength=416 Nr of Repeats=4 RepeatLength=104 seed=GTTTCTAGCA  
Num.seqs=3 Similarity=0.829060

11  
ATGCTAGAAACTGATTCAAAGCTTGAACAAGAATATCTGTAAACATAAGATCCACCTCCAGTTTGAAAATAA  
GGAAAAAGAGAATTAGCCAAGAGTGCCGATA  
GCF\_002019765.1\_ASM201976v1\_genomic.fna\_1:254081-254703 Satlength=623 Nr  
of Repeats=6 RepeatLength=104 seed=ATGCTAGAAA Num.seqs=4  
Similarity=0.952991  
ATGCTAGAAACTGATTCAAAGCTTGAACAAGAATATCTGTAAACATAAGATCCACCTCCAGTTTGAAAATAA  
GGAAAAAGAGAATTACCCAAGAGTGCCGATA

\*\*\*\*\*  
\*\*\*\*\*

Consensus:

ATGCTAGAAACTGATTCAAAGCTTGAACAAGAATATCTGTAAACATAAGATCCACCTCCAGTTTGAAAATAA  
GGAAAAAgAGAATTAgCCAAGAGTGCCGATA

>Bacillus\_Fam\_240\_84\_3 Nr. of seq. 3 Alignment length(with gaps) = 84  
Alignment score = 0.825397  
GCF\_001654695.1\_ASM165469v1\_genomic.fna\_26:0-419 Satlength=420 Nr of  
Repeats=5 RepeatLength=84 seed=AAGAGTTTTC Num.seqs=5 Similarity=0.834921  
0  
AAGAGTTTTTCAGAGATGCTTGAAGAAAGATCTCCCGAATGTGAAGAGTCTGAATCAATCAAAGAAGAGGATAC  
TTCATTAGAAG  
Rev.of\_GCF\_001654695.1\_ASM165469v1\_genomic.fna\_34:68-566 Satlength=499 Nr  
of Repeats=6 RepeatLength=84 seed=AAACTCTTC Num.seqs=4  
Similarity=0.814815  
AAGAGTTTTTCAGAGATGCTTGAAGAAAGATCTCCTGAATGTGATGATTGTGAATTAATCAAAGAAGAAGATAC  
TTCATTAGAAG  
Rev.of\_GCF\_001654695.1\_ASM165469v1\_genomic.fna\_34:67-985 Satlength=919 Nr  
of Repeats=11 RepeatLength=84 seed=GAAAACTCTT Num.seqs=7

Similarity=0.726237 10  
AAGAGTTTTTCAGCGATGCTTGAAGAAAGATCTCCCGAATGGGATGAGTCTGAATCAATNAANGAGGAAGTCAC  
ATCACTAGAAA

\*\*\*\*\* \* \*\*\*\*\* \*\*\*\*\* \*\* \* \* \*\*\*\*\* \*\* \* \* \* \*  
\*\*\* \*\*\*\*\*

Consensus:

AAGAGTTTTCaGaGATGCTTGAAGAAAGATCTCCcGAATGtGAtGAGtCtGAATcAATcAAaGAaGAaGatAC  
tTCAtTAGAAg

>Bacillus\_Fam\_241\_59\_3 Nr. of seq. 3 Alignment length(with gaps) = 66  
Alignment score = 0.611111  
GCF\_000508325.1\_BAVI\_1\_genomic.fna\_42:2128-2428 Satlength=301 Nr of  
Repeats=4 RepeatLength=60 seed=GGCTGGGTCA Num.seqs=3 Similarity=0.733333  
0 GGCTGGGT-CAAAGTGAAGGAANA-TGGTATTACCTTAA--TNGTAAT--GGAGCTATGCAAACC  
GCF\_001591805.1\_ASM159180v1\_genomic.fna\_14:1768-2128 Satlength=361 Nr of  
Repeats=4 RepeatLength=60 seed=AAATGGTATT Num.seqs=3 Similarity=0.702509  
21 GGCTGGCTGCAAACAG-GNCGCAA-TGGTATTACCTCAA--TC--AATCAGGTGCGATGCAAAC  
GCF\_000508325.1\_BAVI\_1\_genomic.fna\_45:33463-33823 Satlength=361 Nr of  
Repeats=6 RepeatLength=60 seed=AAGTGGTATT Num.seqs=4 Similarity=0.483165  
22 GGCTGGGTGCAAACCTG-GCGGCAAAGTGGTATTACCTTAACATC--NAGC-GGCGCGATGCAAACC

\*\*\*\*\* \* \*\*\*\* \* \*\* \* \* \*\*\*\*\* \*\* \* \* \*\* \*\* \*\*\*\*\*

Consensus:

GGCTGGgTgCAAActGgnGGcAaATGGTATTACCTtAATcaAtcGGnGCgATGCAAACc

>Bacillus\_Fam\_242\_66\_3 Nr. of seq. 3 Alignment length(with gaps) = 66  
Alignment score = 0.752525  
GCF\_001591805.1\_ASM159180v1\_genomic.fna\_24:108668-109031 Satlength=364 Nr  
of Repeats=5 RepeatLength=60 seed=ACTGGCTGGG Num.seqs=4  
Similarity=0.479167 0  
ACAGGCTGGGCAAAAGTAGGAGGTAAATGGTACTTCCTTGATGC-AA-G-CGGT--GCAATGAAA  
Rev.of\_GCF\_000299035.1\_ASM29903v1\_genomic.fna\_2:1035187-1035517  
Satlength=331 Nr of Repeats=5 RepeatLength=66 seed=TAGTACCATT Num.seqs=5  
Similarity=0.727363 35  
ACAGGNTGGGNACAAGTAGATGGAAAATGGTACTACCTAGATGCAAATGATGGTGGAGCAATGAAA  
Rev.of\_GCF\_000299035.1\_ASM29903v1\_genomic.fna\_2:1035252-1037684  
Satlength=2433 Nr of Repeats=17 RepeatLength=66 seed=GTAGTACCAT  
Num.seqs=15 Similarity=0.705306  
36 ACAGGCTGGGNACAAGTAGANGGNAATGGTACTACCTAGATGGAAATGATGGTGGAGCAATGAAA

\*\*\*\*\* \*\*\*\* \* \*\*\*\*\* \*\* \*\*\*\*\* \*\*\* \*\*\*\*\* \*\* \* \*\*\* \*\*\*\*\*

Consensus:

ACAGGcTGGGnAcAAGTAGanGGnAAATGGTACTaCCTaGATGcaAAAtGatGGTggaGCAATGAAA

>Bacillus\_Fam\_243\_66\_3 Nr. of seq. 3 Alignment length(with gaps) = 66  
Alignment score = 1.000000  
GCF\_001887185.1\_ASM188718v1\_genomic.fna\_65:9688-9951 Satlength=264 Nr of  
Repeats=4 RepeatLength=66 seed=GGGGTCTGAC Num.seqs=3 Similarity=0.865320  
0 GGGGTCTGACCCCGTTTGTATAATCAAGAGCTACGAACCCTTGTCTTTCCTGGAATTAACGCTTG

Rev.of\_GCF\_001887185.1\_ASM188718v1\_genomic.fna\_362:0-329 Satlength=330 Nr  
of Repeats=5 RepeatLength=66 seed=GGGGTCAGAC Num.seqs=5  
Similarity=0.975758 13  
GGGGTCTGACCCCGTTTGTATAATCAAGAGCTACGAACCCTTGTCTTTCCTGGAATTAACGCTTG  
Rev.of\_GCF\_002009555.1\_ASM200955v1\_genomic.fna\_48:948-1343 Satlength=396  
Nr of Repeats=6 RepeatLength=66 seed=GGGGTCAGAC Num.seqs=5  
Similarity=0.886869 13  
GGGGTCTGACCCCGTTTGTATAATCAAGAGCTACGAACCCTTGTCTTTCCTGGAATTAACGCTTG

\*\*\*\*\*  
Consensus:

GGGGTCTGACCCCGTTTGTATAATCAAGAGCTACGAACCCTTGTCTTTCCTGGAATTAACGCTTG

>Bacillus\_Fam\_244\_55\_3 Nr. of seq. 3 Alignment length(with gaps) = 58  
Alignment score = 0.607280  
GCF\_900109925.1\_IMG-  
taxon\_2651870116\_annotated\_assembly\_genomic.fna\_16:309953-310163  
Satlength=211 Nr of Repeats=4 RepeatLength=53 seed=TATTGGTGAC Num.seqs=3  
Similarity=0.865828 0 TATTGGTGACCTTTC-  
TCCTCTCG-GGCGAC--CCCACTTAGGGCACCAA-GAGACCT  
Rev.of\_GCF\_900109925.1\_IMG-  
taxon\_2651870116\_annotated\_assembly\_genomic.fna\_26:134607-134815  
Satlength=209 Nr of Repeats=4 RepeatLength=53 seed=AGGAAGAAAG Num.seqs=3  
Similarity=0.882600 20 TGTGGTGACCTTTCCTC-AG--AC-  
TCTTCCCACTTTGGGCACCAATGGG-CCT  
GCF\_900109925.1\_IMG-  
taxon\_2651870116\_annotated\_assembly\_genomic.fna\_36:66229-66446  
Satlength=218 Nr of Repeats=4 RepeatLength=53 seed=ATTGGTGACC Num.seqs=3  
Similarity=0.773663 54  
TATTGGTGACCTTTCCTTGTCTAGCAAC-ACTT--ACTTTGGGCACCAATGAG-CCT

\* \*\*\*\*\* \* \* \* \* \*\*\*\*\* \* \* \* \*  
Consensus:

TaTTGGTGACCTTTCtTccTctaGnaCaCttcccACTTtGGGCACCAAtGaGCCT

>Bacillus\_Fam\_245\_53\_3 Nr. of seq. 3 Alignment length(with gaps) = 57  
Alignment score = 0.606238  
GCF\_000181495.1\_ASM18149v1\_genomic.fna\_167:17100-17312 Satlength=213 Nr  
of Repeats=4 RepeatLength=53 seed=TGGCCCATTT Num.seqs=4  
Similarity=0.865828  
0 TGGCCCATTTACCACC-TTATTGGCCCAACATC-C-T-CTCATAACTTGATTCTCAT  
Rev.of\_GCF\_000181495.1\_ASM18149v1\_genomic.fna\_186:351607-352031  
Satlength=425 Nr of Repeats=8 RepeatLength=53 seed=AGATATAGAA Num.seqs=6  
Similarity=0.854088 44  
TGGGCCATTTA-CACCTTTAATGGCCCAACATCTCTT-CT-ATATCTT-ATTCTCAT  
GCF\_000181495.1\_ASM18149v1\_genomic.fna\_186:601490-601914 Satlength=425 Nr  
of Repeats=6 RepeatLength=53 seed=TGGCCCATTT Num.seqs=4  
Similarity=0.616162 0  
TGGCCCATTTAGCTCT-TAAATGGGCCAACATC---TACTCAAAAATGGAATCTCAA

\*\*\* \*\*\*\*\* \* \* \* \* \*\*\*\*\* \* \* \* \* \*  
Consensus:

TGGcCCATTTAnCaCcTtAaTGGcCCAACATCcTCTcAtAacTtgAtTCTCAt

```
>Bacillus_Fam_246_53_3  Nr. of seq. 3 Alignment length(with gaps) = 56
Alignment score = 0.684524
GCF_000708755.2_ASM70875v2_genomic.fna_1:523918-524339 Satlength=422 Nr
of Repeats=8 RepeatLength=53 seed=AAAAGTGGCG Num.seqs=5
Similarity=0.856604
0   AAAAGTGGCGCCATTcAGNAGAGTGTGCCACATTT-GAGGTGA--AGACCCCCGN
Rev.of_GCF_000708755.2_ASM70875v2_genomic.fna_6:246542-246807
Satlength=266 Nr of Repeats=5 RepeatLength=53 seed=GCAGAATGGC Num.seqs=5
Similarity=0.859119                                     17   -
-AAGTGGCGCCATTCTGCACAGTGGTGCCACTTTTCGA-GTGATGAGATTCTCAA
Rev.of_GCF_000709935.2_ASM70993v2_genomic.fna_15:163135-163347
Satlength=213 Nr of Repeats=4 RepeatLength=53 seed=GAATGGCGCC Num.seqs=4
Similarity=0.878407                                     67   --
AAGTGGCGCCATTCTGCGTAGTGGTGCCACTTTTCGA-GTGAAGAGACTCTCAA
```

\*\*\*\*\* \* \*\*\*\* \* \* \* \* \* \* \*
Consensus:

AAGTGGCGCCATTCTGcanAGTGgTGCCACTTTTcGAGTGAngAGActCtCaa

```
>Bacillus_Fam_247_50_3  Nr. of seq. 3 Alignment length(with gaps) = 55
Alignment score = 0.630303
GCF_000292245.2_ASM29224v2_genomic.fna_15:25962-26268 Satlength=307 Nr of
Repeats=5 RepeatLength=51 seed=TTTTcATTAC Num.seqs=4 Similarity=0.604663
0   TTTTCATTACCTATTAACCTGTATTGCGACCGTAATTTcGCT-CTGCTTG-GA--
Rev.of_GCF_000292245.2_ASM29224v2_genomic.fna_128:7207-7563 Satlength=357
Nr of Repeats=7 RepeatLength=51 seed=GTAATGAAAA Num.seqs=6
Similarity=0.813508                                     10
TTTTcATTACCTATTcACCTTGATTcGAACCGTAA-TTCGAC-CAGCTCGTGC--
GCF_000292245.2_ASM29224v2_genomic.fna_83:12733-12989 Satlength=257 Nr of
Repeats=5 RepeatLength=51 seed=TTTTcATTAC Num.seqs=4 Similarity=0.702306
2   TTTTCATTACCAATTAACCTTTATTGCGACTCTAA-TTCACCGCANCTCG-CATT
```

\*\*\*\*\* \* \* \* \* \* \* \* \*
Consensus:

TTTTcATTACcTATTaACCTttATTcGcACcgTAATTcGccCagCTcGga

```
>Bacillus_Fam_248_51_3  Nr. of seq. 3 Alignment length(with gaps) = 55
Alignment score = 0.612121
GCF_000175075.1_ASM17507v1_genomic.fna_2:945-1361 Satlength=417 Nr of
Repeats=8 RepeatLength=52 seed=GGTAACAGAG Num.seqs=8 Similarity=0.769558
0   GGTAACAGAGA-GGGCTTCTCAAAGCCCCGAATCGAGTTGAGAATA-GCAAA-AC
Rev.of_GCF_000175075.1_ASM17507v1_genomic.fna_29:154879-155190
Satlength=312 Nr of Repeats=6 RepeatLength=52 seed=TCTCTCTGTT Num.seqs=5
Similarity=0.851572                                     13
GGTAACAGAGAGA-GCGTCTCAAGGCCCGAAGCAAG-AAGCGAAGCGTCTAA-AC
GCF_000175075.1_ASM17507v1_genomic.fna_35:6050-6310 Satlength=261 Nr of
Repeats=5 RepeatLength=52 seed=AACAGAGAAG Num.seqs=5 Similarity=0.943590
56   GGTAACAGAGA-AGGCGTCTCAAGGCCCGAAGCAAG-CAACGAAAC-CCGAAGAC
```

Consensus :

```
>Bacillus_Fam_249_53_3  Nr. of seq. 3 Alignment length(with gaps) = 55
Alignment score = 0.616162
```

\* \* \* \* \*

Consensus :

```
>Bacillus_Fam_250_51_3  Nr. of seq. 3 Alignment length(with gaps) = 55
Alignment score = 0.620202
GCF_000181495.1_ASM18149v1_genomic.fna_100:912-1381 Satlength=470 Nr of
Repeats=9 RepeatLength=52 seed=GTTTCTTCTT Num.seqs=8 Similarity=0.828704
0      GTTTCTTCTT-GAATCTTACCATTATAAA-AC-GGTTTCCCTGCTGTAGGGGTAC
Rev.of_GCF_000181495.1_ASM18149v1_genomic.fna_175:57618-58242
Satlength=625 Nr of Repeats=12 RepeatLength=52 seed=GGTACGATTA
Num.seqs=12 Similarity=0.799145
```

\* \* \* \* \*      \* \*      \* \* \* \*      \* \* \* \* \* \* \* \* \* \* \* \*      \*      \* \* \* \* \* \*      \* \*      \*      \* \* \* \* \*

Consensus :

```
>Bacillus_Fam_251_52_3  Nr. of seq. 3 Alignment length(with gaps) = 55
Alignment score = 0.634343
```

GCF\_000292245.2\_ASM29224v2\_genomic.fna\_15:39283-39543 Satlength=261 Nr of  
Repeats=4 RepeatLength=52 seed=TACCACTTTT Num.seqs=3 Similarity=0.914530  
0 TACCACTTTT--TCACTTCACT-CTTCCTCTTTTTTTGTTTCCATCTCCCTTTGGA  
GCF\_000292245.2\_ASM29224v2\_genomic.fna\_107:33-293 Satlength=261 Nr of  
Repeats=5 RepeatLength=52 seed=CCTTTTCTTG Num.seqs=5 Similarity=0.861635  
24 TACCTCTTTTCTCCA--CGCTCCTTCC-CTTTTCTTGCTCCATCCTTGTTTGGT





Similarity=0.848720  
48 TTGGCTACCGTTCTCTTCGCGAT-TC-CTCGGT-TTCGGGATCCATCACACCTCT  
Rev.of\_GCF\_000787375.1\_ASM78737v1\_genomic.fna\_12:89119-89327  
Satlength=209 Nr of Repeats=4 RepeatLength=52 seed=CGGGGGAGAG Num.seqs=4  
Similarity=0.854701 28  
TTGGCTACCGTTCT-TACGC--TCTCCCCGCTTTTCGGGCTCCAACCTACCTCT

\*\*\*\*\* \* \* \* \* \* \* \* \* \* \*  
Consensus:

TTGGCTaCCGTTCTTtcGCnnTcTcNcTcggtTTCGGGatCCAtCacACCTCT

>Bacillus\_Fam\_255\_52\_3 Nr. of seq. 3 Alignment length(with gaps) = 55  
Alignment score = 0.660606  
GCF\_000813125.1\_ASM81312v1\_genomic.fna\_40:47668-47876 Satlength=209 Nr of  
Repeats=4 RepeatLength=52 seed=TTAGACATTT Num.seqs=4 Similarity=0.726496  
39 CAGCT-TACCAGCCT-TGAAATGTCCATTAAACACCTCTT-TTTAGACATTTTCAT  
Rev.of\_GCF\_000813125.1\_ASM81312v1\_genomic.fna\_138:81898-82158  
Satlength=261 Nr of Repeats=5 RepeatLength=52 seed=GTCTAATAAA Num.seqs=5  
Similarity=0.828205 44 -  
AGCTACAACAGTTTCTGAAATGTCTATTAAACACCTTTTAT-TAGACATTTTCA-  
Rev.of\_GCF\_001315165.1\_ASM131516v1\_genomic.fna\_21:7080-7288 Satlength=209  
Nr of Repeats=4 RepeatLength=52 seed=AAATGTCTAA Num.seqs=4  
Similarity=0.829060 48  
-ATCCCCATCAGCTTCTGAAATGTCTATTAAATCCCTTTTAT-TAGACATTTTA-

\*\*\*\*\* \* \* \* \* \* \* \* \* \* \*  
Consensus:

TAGACATTTcAAgCtnCAnCAGctTcTGAAATGTCTATTAAAcacCTtTTaT

>Bacillus\_Fam\_256\_52\_3 Nr. of seq. 3 Alignment length(with gaps) = 55  
Alignment score = 0.668687  
GCF\_001636315.1\_ASM163631v1\_genomic.fna\_1:379346-379554 Satlength=209 Nr  
of Repeats=4 RepeatLength=52 seed=CCTCTATGTG Num.seqs=4  
Similarity=0.816239  
0 CCTCTATGTGCACTT-AACAAGC-TTTTTCAATCGATTTCGTGTTCATTG-AGAC  
GCF\_001636315.1\_ASM163631v1\_genomic.fna\_1:2299724-2300141 Satlength=418  
Nr of Repeats=8 RepeatLength=52 seed=GGTTTCGTGT Num.seqs=7  
Similarity=0.839173 31  
-CTCTATGTGCACTT-TCCTCGC-TTTTTTCATTGGTTTCGTGTTCATTGAAGAC  
Rev.of\_GCF\_001636315.1\_ASM163631v1\_genomic.fna\_1:4170771-4171031  
Satlength=261 Nr of Repeats=5 RepeatLength=52 seed=AAGAAGTGTC Num.seqs=5  
Similarity=0.871795 17 -  
CTCTATGGACACTTCTTC-CGCTTTTTTTTCA-CGATTTCGTGTTCATTGAGGAC

\*\*\*\*\* \* \* \* \* \* \* \* \* \* \*  
Consensus:

CTCTATGtgCACTTtnCncGCTTTTTtcAtcGaTTTCGTGTTCATTGaaGAC

>Bacillus\_Fam\_257\_52\_3 Nr. of seq. 3 Alignment length(with gaps) = 55  
Alignment score = 0.634343

GCF\_001636315.1\_ASM163631v1\_genomic.fna\_1:2912216-2912475 Satlength=260  
 Nr of Repeats=5 RepeatLength=52 seed=TGCATTGCCC Num.seqs=4  
 Similarity=0.841880 0  
 TGCATTGCCCCAAAAACGG-GA--AGAGCCACTAATTTGGTCAAAGGAAGAGGGA  
 GCF\_001636315.1\_ASM163631v1\_genomic.fna\_1:3674698-3674906 Satlength=209  
 Nr of Repeats=4 RepeatLength=52 seed=AAACGAGGTG Num.seqs=4  
 Similarity=0.867521 11  
 TGCATTGCCCCAAACGAGGTGA-TACATCAA--AATTTGGTCAATGGAAGAGGGG  
 GCF\_001636315.1\_ASM163631v1\_genomic.fna\_1:4951452-4952180 Satlength=729  
 Nr of Repeats=14 RepeatLength=52 seed=ATTGCCCAAA Num.seqs=12  
 Similarity=0.924631 55  
 TGCATTGCCCCAAAATCGGTGATTAGATGGA--AA-TTGGTCAATGGACGGGGCT

\*\*\*\*\* \*\* \* \* \* \*\* \*\*\*\*\* \*\*\* \* \*\*

Consensus:

TGCATTGCCCCAAAancGGtGAtAgAtcnAAAtTTGGTCAAtGGAaGaGGgn

>Bacillus\_Fam\_258\_51\_3 Nr. of seq. 3 Alignment length(with gaps) = 55  
 Alignment score = 0.612121  
 GCF\_001636325.1\_ASM163632v1\_genomic.fna\_1:443016-443432 Satlength=417 Nr  
 of Repeats=8 RepeatLength=52 seed=GTTTATTCCT Num.seqs=8  
 Similarity=0.880952  
 0 GTTTATTCCTCTAAAGCTTCAAAATATG--A-ATGCCTTCAGGTGAATAAATGGG  
 Rev.of\_GCF\_001636325.1\_ASM163632v1\_genomic.fna\_1:2689693-2690109  
 Satlength=417 Nr of Repeats=8 RepeatLength=52 seed=AGAGGAATAA Num.seqs=8  
 Similarity=0.879409 12  
 ATTTATTCCTCTGAAGCTGTAGAAGTCGTCA-A-G-CTTCAGGTGAAGAAACGAG  
 GCF\_001636325.1\_ASM163632v1\_genomic.fna\_3:480673-481035 Satlength=363 Nr  
 of Repeats=7 RepeatLength=52 seed=CTAAAGCAGC Num.seqs=6  
 Similarity=0.924786  
 62 ATTTCTTCCTCTAAAGCAGCAAAATTCG-CAGA-G-CTTGAGGTGAATAACAGAG

\*\*\* \*\*\*\*\* \* \*\* \* \* \* \* \*\* \*\*\*\*\* \*\* \* \*

Consensus:

aTTTaTTCCTCTaAAGCtgcaAAAttcGcAAGCTTcAGGTGAAtAAanGaG

>Bacillus\_Fam\_259\_52\_3 Nr. of seq. 3 Alignment length(with gaps) = 55  
 Alignment score = 0.723232  
 GCF\_001887185.1\_ASM188718v1\_genomic.fna\_350:150-462 Satlength=313 Nr of  
 Repeats=6 RepeatLength=52 seed=AATGTGTCTC Num.seqs=6 Similarity=0.854927  
 0 AATGTGTCTCAAGACTGGATCTTGAGACAGATAAAGAGG---GAGAAAGGAGAAA  
 Rev.of\_GCF\_002009555.1\_ASM200955v1\_genomic.fna\_24:43390-43598  
 Satlength=209 Nr of Repeats=4 RepeatLength=52 seed=TGAGACACAT Num.seqs=4  
 Similarity=0.864256 11  
 AATGTGTCTCAAGACTGGATCTTGAGACAGATAAAGAGG---GGGAAAGGAGAAA  
 GCF\_002009555.1\_ASM200955v1\_genomic.fna\_548:51305-51513 Satlength=209 Nr  
 of Repeats=4 RepeatLength=52 seed=AATGTGTCTC Num.seqs=4  
 Similarity=0.656379  
 0 AATGTGTCTCAAGACCAGTGCTTGAGACACATAAA-AGGACTGAG-AACTA-AAA

\*\*\*\*\* \* \*\*\*\*\* \*\*\*\*\* \*\*\* \* \* \* \* \* \*\*

Consensus:

AATGTGTCTCAAGACTgGatCTTGAGACAgATAAAgAGGGaGaAAAggAgAAA

>Bacillus\_Fam\_260\_52\_3 Nr. of seq. 3 Alignment length(with gaps) = 55  
Alignment score = 0.717172  
GCF\_900156875.1\_PRJEB18969\_genomic.fna\_11:1019409-1020084 Satlength=676  
Nr of Repeats=13 RepeatLength=52 seed=ATGAAGACCA Num.seqs=12  
Similarity=0.841103 0  
ATGAAGACCA-ATTAGCTTCTCGGAACTA-GAAAAACGGTCTTCATCTCCGGC-  
GCF\_900156875.1\_PRJEB18969\_genomic.fna\_11:1203981-1207193 Satlength=3213  
Nr of Repeats=62 RepeatLength=52 seed=AAACGGTCTT Num.seqs=50  
Similarity=0.899766 32  
ATGAAAACCATTTTTCTCTTC-CGG-AACAAGGAGAAACGGTCTTCAT-GACGGCG  
GCF\_900156875.1\_PRJEB18969\_genomic.fna\_11:1208970-1209385 Satlength=416  
Nr of Repeats=8 RepeatLength=52 seed=AAACGGTCTT Num.seqs=7  
Similarity=0.818808 32  
ATGAAAACCATTTTTCTCTTC-CGG-AACAAGGAGAAACGGTCTTCAT-GACGGCG

\*\*\*\*\* \*\*  
Consensus:

ATGAaACCAttTTctCTTCCGGAACaAgGAgAAACGGTCTTCATgaCGGCg

>Bacillus\_Fam\_261\_53\_3 Nr. of seq. 3 Alignment length(with gaps) = 55  
Alignment score = 0.640404  
GCF\_001439915.1\_ASM143991v1\_genomic.fna\_83:206289-206524 Satlength=236 Nr  
of Repeats=5 RepeatLength=53 seed=ACCGCAAGAA Num.seqs=3  
Similarity=0.983229 0  
ACCGCAAGAGTGTtTAACGGTACATGCTCAGTCCAAAAAGCAGA--AAGCATGT  
GCF\_001439915.1\_ASM143991v1\_genomic.fna\_116:178064-178329 Satlength=266  
Nr of Repeats=5 RepeatLength=53 seed=TGTACCGCAA Num.seqs=5  
Similarity=0.816049 50  
ACCGCAAGAGAGGTTTCGTGGTACATGCTCAAT-GAAAAA-AAGCTCAAGCGTGT  
Rev.of\_GCF\_001439915.1\_ASM143991v1\_genomic.fna\_122:86523-87001  
Satlength=479 Nr of Repeats=9 RepeatLength=53 seed=TGAGCTTGTA Num.seqs=8  
Similarity=0.893082 84  
ACCGCAAGAACGGTTTCACGGTACAAGCTCACG-CAAAAA-TAGACCTAGCATGT

\*\*\*\*\*  
Consensus:

ACCGCAAGAngGTTTcacGGTACAtGCTCAntcAAAAAnAGancaAGCaTGT

>Bacillus\_Fam\_262\_53\_3 Nr. of seq. 3 Alignment length(with gaps) = 55  
Alignment score = 0.696970  
GCF\_002019605.1\_ASM201960v1\_genomic.fna\_1:3456401-3456877 Satlength=477  
Nr of Repeats=9 RepeatLength=53 seed=CGGGCACTAT Num.seqs=8  
Similarity=0.853549 0  
CGGGCACTATGAACCTTTATAGTTACCGCCACCACTTCTTCT-A-TCCCTCCCA  
Rev.of\_GCF\_002019605.1\_ASM201960v1\_genomic.fna\_1:3950268-3950692  
Satlength=425 Nr of Repeats=8 RepeatLength=53 seed=CGGTCACTAT Num.seqs=8  
Similarity=0.858940 29  
CGGGCACTATGAACCTCTATAGTGACCG-C-GAACTACTTGTGACTCCCTCCTG

Rev.of\_GCF\_002019605.1\_ASM201960v1\_genomic.fna\_1:4323665-4324034  
Satlength=370 Nr of Repeats=7 RepeatLength=53 seed=CGGTCACATAT Num.seqs=5  
Similarity=0.768553 29  
CGGGCACTATGAACTCTCTATAGTGACCG-C-TCTCTTCTTTGACTTCCTCCTG

\*\*\*\*\* \*\* \*\*\*\*\* \*\*\*\* \* \*\* \*\*\* \* \* \* \*\*\*\*\*  
Consensus:

CGGGCACTATGAACTCTCTATAGTGACCGCncaCTtCTTnTgAcTcCCTCctg

>Bacillus\_Fam\_263\_52\_3 Nr. of seq. 3 Alignment length(with gaps) = 54  
Alignment score = 0.633745  
GCF\_000175075.1\_ASM17507v1\_genomic.fna\_32:169519-169779 Satlength=261 Nr  
of Repeats=5 RepeatLength=52 seed=GTCAAATAGA Num.seqs=5  
Similarity=0.864103  
0 GTCAAATAGAA-CGGCTCTATACGCCCCGAACGC-CCGTTAAAAAGAGGAAAACG  
GCF\_000175075.1\_ASM17507v1\_genomic.fna\_48:8867-9075 Satlength=209 Nr of  
Repeats=4 RepeatLength=52 seed=GCTTCTATAC Num.seqs=4 Similarity=0.877358  
12 GTCAAATAGAA-TGCTTCTATACGCCCCGAAGGC-ACGAGGAAAAGCGGTAAACG  
GCF\_000175075.1\_ASM17507v1\_genomic.fna\_32:398955-399215 Satlength=261 Nr  
of Repeats=5 RepeatLength=52 seed=CCAAAGGTCA Num.seqs=5  
Similarity=0.943590  
46 GTCAAATAGAAGCGG-TCTATATGCCCCGAA-GCGCCGTGAAAGAAAGTCCAAAG

\*\*\*\*\* \* \*\*\*\*\* \*\*\*\*\* \*\* \*\* \* \* \* \* \*  
Consensus:

GTCAAATAGAAcGgnTCTATAcGCCCCGAAnGCcCGtgaAAaAgaGnaAAcG

>Bacillus\_Fam\_264\_52\_3 Nr. of seq. 3 Alignment length(with gaps) = 54  
Alignment score = 0.641975  
GCF\_000181495.1\_ASM18149v1\_genomic.fna\_105:10535-10847 Satlength=313 Nr  
of Repeats=6 RepeatLength=52 seed=CTCATGACAC Num.seqs=6  
Similarity=0.839316  
0 CTCATGACACTTTT-CTCTCTCCTTTTTGCCTTTTCATGCCCTTGAGACGCTTC-  
GCF\_000181495.1\_ASM18149v1\_genomic.fna\_178:76540-76957 Satlength=418 Nr  
of Repeats=8 RepeatLength=52 seed=CTCTCTTTTT Num.seqs=7  
Similarity=0.867026  
16 CTCACGACACTTTT-CCCTCTCTTTTTCTTNTTTCATGTCCTTGAGAAACTTC-  
Rev.of\_GCF\_000181495.1\_ASM18149v1\_genomic.fna\_146:13461-13667  
Satlength=207 Nr of Repeats=4 RepeatLength=52 seed=TCAAGGACAT Num.seqs=3  
Similarity=0.636364 44  
TTCAAGACACTTTTGCTTTCT-ATTTTGGANTTTGATGTCCTTGAGA-ACTCCC

\*\*\* \*\*\*\*\* \* \*\*\* \*\*\*\*\* \*\*\* \*\*\* \*\*\*\*\* \*\* \*  
Consensus:

cTCAnGACACTTTTCTcTCTcnTTTTngnnTTtCATGtCCTTGAGAnaCTtC

>Bacillus\_Fam\_265\_52\_3 Nr. of seq. 3 Alignment length(with gaps) = 54  
Alignment score = 0.637860  
GCF\_000186145.1\_Bacillus\_sp\_2\_A\_57\_CT2\_V1\_genomic.fna\_2:775846-776164  
Satlength=319 Nr of Repeats=6 RepeatLength=52 seed=ACTTCGGACT Num.seqs=5

Similarity=0.675472 0  
ACTTCGGACTCACTTCCTCCA-ATTTCTCTCTTTCTGTCTGAA-GNTGCACCT  
Rev.of\_GCF\_000186145.1\_Bacillus\_sp\_2\_A\_57\_CT2\_V1\_genomic.fna\_5:390749-  
391008 Satlength=260 Nr of Repeats=5 RepeatLength=52 seed=GAGTCCGAAG  
Num.seqs=4 Similarity=0.671908 11  
ACTTCGGACTCG-TTCCTCTGGATATCCGCTTTTCCTGTCCGAATGGTG-ACCG  
GCF\_000294775.2\_ASM29477v2\_genomic.fna\_1:2523541-2523749 Satlength=209 Nr  
of Repeats=4 RepeatLength=52 seed=CTGTCCGAAT Num.seqs=4  
Similarity=0.676101 34  
ACTTCGGACTCA-CACCTCCAGATTACCCCTTCTTCTGTCCGAATGATG-ACCA

\*\*\*\*\*      \*\*\*\*      \*\*      \*\*      \*      \*\*\*\*\*      \*      \*      \*

Consensus:

ACTTCGGACTCattCCTCcagATttCCnCTttTtCTGTCCGAAtGnTGACCn

>Bacillus\_Fam\_266\_52\_3 Nr. of seq. 3 Alignment length(with gaps) = 54  
Alignment score = 0.699588  
GCF\_000311725.1\_ASM31172v1\_genomic.fna\_3:146549-147069 Satlength=521 Nr  
of Repeats=10 RepeatLength=52 seed=CGGATTCGGA Num.seqs=10  
Similarity=0.860867 0  
CGGATTCGACAA-CATCACCGAT-TCACCCTGCTTCCCTGTCCGAATATCAAG  
GCF\_000311725.1\_ASM31172v1\_genomic.fna\_3:585727-586091 Satlength=365 Nr  
of Repeats=7 RepeatLength=52 seed=GATTCGACA Num.seqs=7  
Similarity=0.897436  
2 CGGATTCGACAA-CATTGCCGGT-TCATCCTGCTTCTCTGTCCGAATATCAAG  
GCF\_000311725.1\_ASM31172v1\_genomic.fna\_6:313304-313604 Satlength=301 Nr  
of Repeats=6 RepeatLength=52 seed=TGTCCGAATA Num.seqs=5  
Similarity=0.836478  
37 CGGATTCGACAATCCCTACTACTCTC-TCCT-CTTTCCTGTCCGAATATGAAG

\*\*\*\*\*      \*      \*      \*      \*      \*      \*      \*      \*      \*

Consensus:

CGGATTCGACAACattaCcgnTTCatCCTgCTTccCTGTCCGAATATcAAG

>Bacillus\_Fam\_267\_53\_3 Nr. of seq. 3 Alignment length(with gaps) = 54  
Alignment score = 0.627572  
GCF\_000430765.1\_ASM43076v1\_genomic.fna\_10:72408-72928 Satlength=521 Nr of  
Repeats=10 RepeatLength=52 seed=CTAAAGGACA Num.seqs=10  
Similarity=0.738721  
0 CTAAAGGACAAAACCTCGGATGGA-GCATCAAAGATAAGTCCATGAGAAG-GGTC  
Rev.of\_GCF\_000430765.1\_ASM43076v1\_genomic.fna\_14:23161-23577  
Satlength=417 Nr of Repeats=8 RepeatLength=52 seed=TTGTCCTTTA Num.seqs=8  
Similarity=0.826923 10  
-TAAAGGACAAAACCTCAGTCGCC-CCAGCAAAGATCTGTCCATGAGAAGCGGTC  
GCF\_000430765.1\_ASM43076v1\_genomic.fna\_13:190-660 Satlength=471 Nr of  
Repeats=9 RepeatLength=52 seed=TAAAGGACAA Num.seqs=7 Similarity=0.639250  
1 CTAAAGGACAAAAC-AGGATCAAGGCAGCAAAGATNNGTCCATGATAGGCATT-

\*\*\*\*\*      \*      \*      \*      \*      \*      \*      \*      \*      \*

Consensus:

cTAAAGGACAAAACtgcGatgnagCAgCAAAGATnnGTCCATGAgAaGcggTc

>Bacillus\_Fam\_268\_52\_3 Nr. of seq. 3 Alignment length(with gaps) = 54  
Alignment score = 0.633745  
GCF\_000508325.1\_BAVI\_1\_genomic.fna\_31:7329-7537 Satlength=209 Nr of  
Repeats=4 RepeatLength=52 seed=AGTGCCCGTG Num.seqs=4 Similarity=0.880342  
0 AGTGCCCGTGCGCATGGAAAAACGCCAA--AGACGGGCACTCTGAGAGGTTCAC  
Rev.of\_GCF\_001591805.1\_ASM159180v1\_genomic.fna\_25:13492-13700  
Satlength=209 Nr of Repeats=4 RepeatLength=52 seed=GGGCACTGTG Num.seqs=4  
Similarity=0.854701 7  
AGTGCCCATGACCATGGGAAAAAGCCAA--GAATGGGCACTCTGAGAGGTCCAC  
GCF\_001591665.1\_ASM159166v1\_genomic.fna\_53:45335-45543 Satlength=209 Nr  
of Repeats=4 RepeatLength=52 seed=GGGCACTCTG Num.seqs=4  
Similarity=0.820513  
32 AGTGCCCAAACGC--GCGAAAAATCGAAGTGCACGGGCACTCTGAGCGGTTGAC

\*\*\*\*\* \* \* \*\*\*\* \* \*\* \* \*\*\*\*\* \*\*\* \*\*  
Consensus:

AGTGCCCatgcgCatGggAAAAagCcAAgnAcGGGCACTCTGAGaGGTtcAC

>Bacillus\_Fam\_269\_52\_3 Nr. of seq. 3 Alignment length(with gaps) = 54  
Alignment score = 0.625514  
GCF\_000708755.2\_ASM70875v2\_genomic.fna\_2:68427-68791 Satlength=365 Nr of  
Repeats=7 RepeatLength=52 seed=AGTTTTGAGG Num.seqs=7 Similarity=0.893773  
0 AGTTTTGAGGGTGCTTATCTGTCTTATAAGTGCCCTCAATTTTTGAT--TTTCA  
Rev.of\_GCF\_000708755.2\_ASM70875v2\_genomic.fna\_22:217896-218468  
Satlength=573 Nr of Repeats=10 RepeatLength=52 seed=TTGAGGGCAC  
Num.seqs=9 Similarity=0.781207  
39 ATTTTTGAGGGTACTATTCTGCGGTTTTAGTGCCCTCAA--TTTCCTACTTTTCG  
Rev.of\_GCF\_000709935.2\_ASM70993v2\_genomic.fna\_5:41766-41974 Satlength=209  
Nr of Repeats=4 RepeatLength=52 seed=AAAAATGAG Num.seqs=4  
Similarity=0.846154 44  
GTTTTTGAGGGTACGATTCTGGCTTTTTAGTACCCTCAATTTTTGGT--TTTTG

\*\*\*\*\* \* \*\*\*\* \* \* \*\*\* \*\*\*\*\* \*\*\* \* \*\*\*  
Consensus:

atTTTTGAGGGTaCtatTCTGnctTtTtAGTgCCCTCAAttTTTgnTTTTcg

>Bacillus\_Fam\_270\_52\_3 Nr. of seq. 3 Alignment length(with gaps) = 54  
Alignment score = 0.703704  
GCF\_000708755.2\_ASM70875v2\_genomic.fna\_22:181704-182016 Satlength=313 Nr  
of Repeats=6 RepeatLength=52 seed=GTGGAAATGA Num.seqs=6  
Similarity=0.854701  
0 GTGGAAATGACCCTTCAG-CAAGATCAAATCTGTGCGAAGGTCACAAAGCCGC-  
GCF\_000709935.2\_ASM70993v2\_genomic.fna\_24:292765-293078 Satlength=314 Nr  
of Repeats=6 RepeatLength=52 seed=TGGAAATGAC Num.seqs=5  
Similarity=0.846154  
1 GTGGAAATGACCCTTCAG-CATGATCAAATCTGTGCGAAGGTCACAAAGGCGC-  
GCF\_000709935.2\_ASM70993v2\_genomic.fna\_1:11462-11774 Satlength=313 Nr of  
Repeats=6 RepeatLength=52 seed=TGTCCTTCA Num.seqs=6 Similarity=0.883761  
6 -AGGAAATGTCCCTTCAGCCACGCTTGAA-CAGCGTGAAGGTCACAAAAGCGGA

\*\*\*\*\* \*\*\*\*\* \*\* \* \* \*\* \* \* \* \*\*\*\*\* \*\*

Consensus:

gtGGAAATGaCCCTTCAGCAnGaTcaAAtCtGtGcGAAGGTCACAAAggCGc

>Bacillus\_Fam\_271\_53\_3 Nr. of seq. 3 Alignment length(with gaps) = 54  
Alignment score = 0.600823  
GCF\_000934845.1\_ASM93484v1\_genomic.fna\_162:31645-32113 Satlength=469 Nr  
of Repeats=9 RepeatLength=52 seed=CGGGCACATG Num.seqs=9  
Similarity=0.904558  
0 CGGGCACATGTTGGCC-TTCTCTGTGACCGTGCTCTCGCTTTTCTTCCTTTT-  
GCF\_001420595.1\_ASM142059v1\_genomic.fna\_11:2811819-2812081 Satlength=263  
Nr of Repeats=5 RepeatLength=52 seed=CTCTTGTTAC Num.seqs=3  
Similarity=0.863248 17  
CGGGCACATGTGCGCC-CCTCTTGTTACCGCTCTCTTGCTTTTTC-TGCTTCCA  
GCF\_001420595.1\_ASM142059v1\_genomic.fna\_11:4482129-4482596 Satlength=468  
Nr of Repeats=9 RepeatLength=52 seed=AGTTTCTGGC Num.seqs=8  
Similarity=0.868132 37  
CGGGCACATGTT-GCCTTCTCTTGTTACCATGC-CTTCGAGTTTCTGGCTTTTCG

\*\*\*\*\* \*\*\* \*\*\*\*\* \*\*\* \* \*\* \*\*\*\*\* \*\*\*

Consensus:

CGGGCACATGTtnGCctcTCTTGtTACCgtgCtCTtgcttTTTcttgCTTtcn

>Bacillus\_Fam\_272\_52\_3 Nr. of seq. 3 Alignment length(with gaps) = 54  
Alignment score = 0.633745  
GCF\_001591645.1\_ASM159164v1\_genomic.fna\_2:312008-312320 Satlength=313 Nr  
of Repeats=6 RepeatLength=52 seed=CTCTCTTACC Num.seqs=6  
Similarity=0.744235  
0 CTCTCTTACCATCCAACCTCTGCTTCCATCACG-AATGGGCACTGA-CAACCACT  
Rev.of\_GCF\_001591645.1\_ASM159164v1\_genomic.fna\_19:50399-50607  
Satlength=209 Nr of Repeats=4 RepeatLength=52 seed=TGGATGGTAA Num.seqs=4  
Similarity=0.839623 15  
CTCTCTTACCATCC-ACCCTCATTTCTCCCGCAATGGGCACTGA-CAACTTCT  
GCF\_001591645.1\_ASM159164v1\_genomic.fna\_13:8919-9439 Satlength=521 Nr of  
Repeats=10 RepeatLength=52 seed=TCTCTCTTAC Num.seqs=10  
Similarity=0.780057  
51 CTCTCTTACCATCGTACCCCGTTTACTCTCC-AACGGGCACTGAGCGAC-GCT

\*\*\*\*\* \*\* \* \*\* \*\* \* \*\* \*\*\*\*\* \* \*\* \*\*

Consensus:

CTCTCTTACCATCcnACcCtnTtccTCnGgAAAtGGGCACTGACaACnnCT

>Bacillus\_Fam\_273\_53\_3 Nr. of seq. 3 Alignment length(with gaps) = 54  
Alignment score = 0.651235  
GCF\_001591665.1\_ASM159166v1\_genomic.fna\_16:63845-64053 Satlength=209 Nr  
of Repeats=4 RepeatLength=52 seed=TCGGTAAAAG Num.seqs=4  
Similarity=0.864256  
0 TCGGTAAAAGGAAGAGTGCTCCATTTACCGAAAAGCAG-AAAAGAGAGCTCTC-  
Rev.of\_GCF\_001591665.1\_ASM159166v1\_genomic.fna\_72:4462-4722 Satlength=261  
Nr of Repeats=5 RepeatLength=52 seed=CTTTTCATTTA Num.seqs=5  
Similarity=0.907692 14  
ACGGTAAATGAAAGAGCGGTTTCATTTACCGAAAAG-GGAAAAAAGAGCACTT-





Similarity=0.824691 0  
GTGTACCTCTAGAACCATCTTGCGGTACATGCTCCTTCATATTTTCACGCC-AGC  
Rev.of\_GCF\_001439915.1\_ASM143991v1\_genomic.fna\_123:2-265 Satlength=264 Nr  
of Repeats=5 RepeatLength=53 seed=GGGTGAGCAT Num.seqs=4  
Similarity=0.945493 38  
ATGTACCGCTAGACTCCTCTTGCGGGACATGCT-CACCCTATTTTCACACCAAGC  
Rev.of\_GCF\_001439915.1\_ASM143991v1\_genomic.fna\_126:203282-203547  
Satlength=266 Nr of Repeats=5 RepeatLength=53 seed=TGAAATAGGG Num.seqs=5  
Similarity=0.876730 45  
GTGTACCGCTAGACACTTCATGCGGCACATGCT-CACCCTATTTTCACACCAAGC

\*\*\*\*\* \* \* \* \*\*\*\*\* \*\*\*\*\* \* \* \*\*\*\*\* \*\* \*\*

Consensus:

gTGTACCGCTAGACnCTCtTGCGGnACATGCTCacCcTATTTTCaCCaAGC

>Bacillus\_Fam\_277\_51\_3 Nr. of seq. 3 Alignment length(with gaps) = 53  
Alignment score = 0.639413  
GCF\_001375535.1\_Bacillus\_niameyensis\_genomic.fna\_6:2695072-2695736  
Satlength=665 Nr of Repeats=13 RepeatLength=51 seed=GAATAGAAGC  
Num.seqs=12 Similarity=0.816201 0  
GAATAGAAGCGCCCTATTTCGACCGTTACA-CG-NGGTTCCACTTCCTTCGGTC  
GCF\_001375535.1\_Bacillus\_niameyensis\_genomic.fna\_6:2711389-2711951  
Satlength=563 Nr of Repeats=11 RepeatLength=51 seed=CTATTTCGACC  
Num.seqs=10 Similarity=0.819567 13  
GAATAGAAGCTTCCTATTTCGACCGTTGCA-CGAGGGTTTCCCTT-CTTCGGGA  
GCF\_001375535.1\_Bacillus\_niameyensis\_genomic.fna\_6:1751787-1752723  
Satlength=937 Nr of Repeats=18 RepeatLength=52 seed=CTATTTCGACC  
Num.seqs=18 Similarity=0.885333 13  
GAATAGAACCCCTCTATTTCGACCGTTCAATCG-ATTTTTCAATTCTTTCGGGC

\*\*\*\*\* \* \*\*\*\*\* \* \* \* \*\* \* \*\* \*\*\*\*\*

Consensus:

GAATAGAAgCnccCTATTTCGACCGTTncACGnggTTtCacTTccTTCGGgc

>Bacillus\_Fam\_278\_51\_3 Nr. of seq. 3 Alignment length(with gaps) = 53  
Alignment score = 0.635220  
GCF\_001420595.1\_ASM142059v1\_genomic.fna\_11:4524426-4524886 Satlength=461  
Nr of Repeats=9 RepeatLength=51 seed=TGTCTGAACT Num.seqs=8  
Similarity=0.829132 0  
TGTCTGAACTTGAGCTAACTTCGGACTTCTTC-CGGATTTTCTCCTG-ATCT  
GCF\_001420595.1\_ASM142059v1\_genomic.fna\_11:4601981-4602760 Satlength=780  
Nr of Repeats=14 RepeatLength=52 seed=ATCTTGCTCTG Num.seqs=12  
Similarity=0.803807 48  
TGTCTGAACTTGAACCTAACTTCGGACTCCAGCATGCCTTTTCTNCGG-ATCT  
GCF\_000934845.1\_ASM93484v1\_genomic.fna\_37:39135-39695 Satlength=561 Nr of  
Repeats=11 RepeatLength=52 seed=AAACCTGTCC Num.seqs=9  
Similarity=0.792735  
47 TGTCCGAACCTTTGGCTAACTTCGGACTACTTT-TGCCTGTTTTNCCTGAAACC

\*\*\*\* \*\*\*\*\* \* \* \* \* \* \* \* \*

Consensus:

TGTCtGAACTTgagCTAACTTCGGACTnCttctGccTtTTTctcCtGAtCt

>Bacillus\_Fam\_279\_51\_3 Nr. of seq. 3 Alignment length(with gaps) = 53  
Alignment score = 0.681342  
GCF\_900104555.1\_IMG-  
taxon\_2651870172\_annotated\_assembly\_genomic.fna\_6:21894-22205  
Satlength=312 Nr of Repeats=6 RepeatLength=51 seed=ACTTTATTTT Num.seqs=5  
Similarity=0.793590 0 ACTTTATTTTCGATTAT-  
TGA-TNGGAAATGTCTTTCATAAGGTCGATGAAGG  
GCF\_900104555.1\_IMG-  
taxon\_2651870172\_annotated\_assembly\_genomic.fna\_16:59730-59985  
Satlength=256 Nr of Repeats=5 RepeatLength=51 seed=TGAAAATGTC Num.seqs=5  
Similarity=0.864052 21 ACTTTATGTT-GATTATATAG-  
TTGAAAATGTCTTTCATGAGCTCGATGAAGG  
GCF\_900104555.1\_IMG-  
taxon\_2651870172\_annotated\_assembly\_genomic.fna\_10:55052-55308  
Satlength=257 Nr of Repeats=5 RepeatLength=51 seed=GACTTTATTTT Num.seqs=4  
Similarity=0.777778 50 ACTTTATTTTGGATT-T-  
TAACTTAAAAATGTCCTTCATAAGGCTGATGAAAG

\*\*\*\*\* \*\* \*\*\*\*\* \* \* \* \*\*\*\*\* \*\*\*\*\* \*\* \*\*\*\*\* \*

Consensus:

ACTTTATtTnGATtATtTaaTtgaAAATGTCTtTTCATaAGgtcGATGAAGG

>Bacillus\_Fam\_280\_52\_3 Nr. of seq. 3 Alignment length(with gaps) = 53  
Alignment score = 0.666667  
GCF\_000430765.1\_ASM43076v1\_genomic.fna\_5:240069-240277 Satlength=209 Nr  
of Repeats=4 RepeatLength=52 seed=TTTTGTCCTT Num.seqs=4  
Similarity=0.880342  
0 TTTTGTCTTCATCCCCCTGATGAAGGACCGTTCTCCTGCACGTGAC-CCTGG  
Rev.of\_GCF\_001636425.1\_ASM163642v1\_genomic.fna\_1:4233510-4233770  
Satlength=261 Nr of Repeats=5 RepeatLength=52 seed=GGTCCTTCAT Num.seqs=5  
Similarity=0.793711 30  
TTTGGGCCTTCATCCGCCTTATGAAGGACCGTTCT-CTGTATTTTCTCTTCG  
Rev.of\_GCF\_001636425.1\_ASM163642v1\_genomic.fna\_1:4415449-4415969  
Satlength=521 Nr of Repeats=10 RepeatLength=52 seed=ATGAAGGACA  
Num.seqs=10 Similarity=0.782099  
65 TTTTGTCTTCATTCCTCCCTATGAAGGACGGTTCA-CTGAATTTTGCACCTCG

\*\*\* \* \*\*\*\*\* \* \*\* \*\*\*\*\* \*\*\*\*\* \*\*\* \* \* \* \* \*

Consensus:

TTTtGtCCTTCATcCcCcttATGAAGGACcGTTCTCTGnAttTtnCnCcTcG

>Bacillus\_Fam\_281\_52\_3 Nr. of seq. 3 Alignment length(with gaps) = 53  
Alignment score = 0.752621  
GCF\_000708755.2\_ASM70875v2\_genomic.fna\_2:1643369-1643733 Satlength=365 Nr  
of Repeats=7 RepeatLength=52 seed=AGTTTCTGCT Num.seqs=7  
Similarity=0.855922 0  
AGTTTCTGCTGCTAAATCCAGTTAAGAACACTTTCACCCGCAAAC-CAACCAG

GCF\_000709935.2\_ASM70993v2\_genomic.fna\_3:65504-65920 Satlength=417 Nr of Repeats=8 RepeatLength=52 seed=GAACACTTTC Num.seqs=8 Similarity=0.821429  
25 AGTTTCTGCTGCTAAATCCAGTTAAGAACTTTACCCGCAAAC-CAACCAG  
GCF\_000708755.2\_ASM70875v2\_genomic.fna\_7:166561-166873 Satlength=313 Nr of Repeats=6 RepeatLength=52 seed=TTTACAACAC Num.seqs=6  
Similarity=0.847863  
20 -GTTTCTGCTGCTAACTCTCGTTTACAACACTTTCAACCGCTCACGCTTCAAA

\*\*\*\*\* \*\* \* \*\*\*\*\* \*\*\*\*\* \*\* \* \* \*

Consensus:

aGTTTCTGCTGCTAAATCcaGTTaAgAACACTTTTCaCCGCaaACCaaCcAg

>Bacillus\_Fam\_282\_52\_3 Nr. of seq. 3 Alignment length(with gaps) = 53  
Alignment score = 0.746331  
GCF\_000752395.1\_Bacillus\_andreraoultii\_genomic.fna\_14:112431-113991  
Satlength=1561 Nr of Repeats=30 RepeatLength=52 seed=TACACGAAAA  
Num.seqs=30 Similarity=0.924727 0  
TACACGAAAACGGCTTATAGAACCT-CTCTATGAACCCAAATTTTATCGAAC  
Rev.of\_GCF\_000752395.1\_Bacillus\_andreraoultii\_genomic.fna\_24:24595-25427  
Satlength=833 Nr of Repeats=15 RepeatLength=52 seed=GTTCTATGAG  
Num.seqs=14 Similarity=0.809626 24  
CACATGAAAAGTGGCTCATAGAACCT-NTCTATGAACCCGAATTTGACCGAAA  
Rev.of\_GCF\_000752395.1\_Bacillus\_andreraoultii\_genomic.fna\_46:151000-151208  
Satlength=209 Nr of Repeats=4 RepeatLength=52 seed=GGGTTCATAG  
Num.seqs=4 Similarity=0.837607 39  
CACATGAAAACGGCTCATAGAA-CTCTTCTATGAACCCAAATTTGATCGAAT

\*\*\* \*\*\*\*\* \*\*\*\*\* \*\* \*\*\*\*\* \*\*\*\*\* \* \*\*\*\*

Consensus:

cACAtGAAAAnnGGCTcATAGAAcCTnTCTATGAACCCaAATTTgAtCGAAAn

>Bacillus\_Fam\_283\_52\_3 Nr. of seq. 3 Alignment length(with gaps) = 53  
Alignment score = 0.658281  
GCF\_000787375.1\_ASM78737v1\_genomic.fna\_1:181126-181438 Satlength=313 Nr of Repeats=6 RepeatLength=52 seed=TTGACTCCCG Num.seqs=6  
Similarity=0.791195  
0 TTGACTCCCGTTCTTCCGCCCTTCGCT-TTTTTCGGGAGTCATCACTCCTCT  
GCF\_000787375.1\_ASM78737v1\_genomic.fna\_25:25502-25762 Satlength=261 Nr of Repeats=5 RepeatLength=52 seed=CGCTCTTTGG Num.seqs=5 Similarity=0.912821  
46 TTGGCTACCGTTCTTCTCTCTTTCTCC-TTTTTCGGGAGCCATCCCCGCTCT  
GCF\_000787375.1\_ASM78737v1\_genomic.fna\_4:180648-181012 Satlength=365 Nr of Repeats=5 RepeatLength=52 seed=GTTTTTCGGT Num.seqs=4  
Similarity=0.880342  
27 TTGACTTCCGTTCTTCC-CACGTTCTCCGTTTTTCGGTAGCCAACACATCCCT

\*\*\* \*\* \*\*\*\*\* \* \* \* \*\*\* \* \*\*\*\*\* \*\* \* \* \* \* \*

Consensus:

TTGaCTnCCGTTCTTcCnCnCTTCTCcTTTTTCGGgAGcCAAtCaCnnCtCT

>Bacillus\_Fam\_284\_52\_3 Nr. of seq. 3 Alignment length(with gaps) = 53  
Alignment score = 0.618449

GCF\_000986785.1\_ASM98678v1\_genomic.fna\_2:158190-158798 Satlength=609 Nr of Repeats=12 RepeatLength=52 seed=CCTCCATCAC Num.seqs=11  
 Similarity=0.821911 0  
 CCTCCATCACACCCATGGAGGACCTTTTTCTCCNAATTTACGAAAGNTGGG-  
 GCF\_000986785.1\_ASM98678v1\_genomic.fna\_8:188503-189125 Satlength=623 Nr of Repeats=11 RepeatLength=52 seed=GTCTCCATC Num.seqs=10  
 Similarity=0.811966 50  
 CCTCCATCACCCCTCATGGAGGACGCTTT-TCCATTTCTCACGCTATTTTCGGT  
 GCF\_000986785.1\_ASM98678v1\_genomic.fna\_21:12509-12820 Satlength=312 Nr of Repeats=6 RepeatLength=52 seed=CCTCCATCAC Num.seqs=5 Similarity=0.882051  
 52 CCTCCATCACCCCTCATGGAAGACCTTTTT-TCCTCTTCCTCCCAAAGCGGT

\*\*\*\*\* \* \*\*\*\*\* \*\*\*\* \*\*\* \*\*\* \* \* \* \* \*\*  
 Consensus:

CCTCCATCACcCtCATGGAgGACcttTTTTCCnntTctCaCgcnAnntcGGt

>Bacillus\_Fam\_285\_52\_3 Nr. of seq. 3 Alignment length(with gaps) = 53  
 Alignment score = 0.907757  
 GCF\_001439965.1\_ASM143996v1\_genomic.fna\_89:30076-30284 Satlength=209 Nr of Repeats=4 RepeatLength=52 seed=AATGTGTGTC Num.seqs=4  
 Similarity=0.848008  
 0 AATGTGTGTCCAAGAGA-GAGCTTGAAACACATTATAAGAGAAACCGGAGGAA  
 GCF\_001887185.1\_ASM188718v1\_genomic.fna\_260:30450-30918 Satlength=469 Nr of Repeats=9 RepeatLength=52 seed=TGAAACACAT Num.seqs=9  
 Similarity=0.791077  
 22 AATGTGTGTCCAAGAGANGAGN-TGAAACACATTATAAGAGAAACCGGAGGAG  
 GCF\_002009555.1\_ASM200955v1\_genomic.fna\_301:3466-3778 Satlength=313 Nr of Repeats=6 RepeatLength=52 seed=TGAAACACAT Num.seqs=6 Similarity=0.781151  
 22 AATGTGTGTCCAAGAGAGGAGC-TGAAACACATTATAAGAGAAACCGGAGGAG

\*\*\*\*\* \*\*\* \*\*\*\*\*  
 Consensus:

AATGTGTGTCCAAGAGAnGAGcTGAAACACATTATAAGAGAAACCGGAGGAg

>Bacillus\_Fam\_286\_53\_3 Nr. of seq. 3 Alignment length(with gaps) = 53  
 Alignment score = 0.851153  
 GCF\_001439965.1\_ASM143996v1\_genomic.fna\_95:72244-72698 Satlength=455 Nr of Repeats=9 RepeatLength=52 seed=ATTGGTTACC Num.seqs=7  
 Similarity=0.792430  
 0 ATTGGTTACCCGTTGCGC-GATTTCACCCGNACTCGGTCACCTTTCGGCNTG  
 Rev.of\_GCF\_001887185.1\_ASM188718v1\_genomic.fna\_11:78-494 Satlength=417 Nr of Repeats=8 RepeatLength=52 seed=GGGTAACCAA Num.seqs=8  
 Similarity=0.813118 11  
 ATTGGTTACCCTGTTGCGCGGATTTACCCGGACTCGGTCACCTTTGGGCNTG  
 GCF\_001887185.1\_ASM188718v1\_genomic.fna\_43:121-747 Satlength=627 Nr of Repeats=12 RepeatLength=52 seed=TTGGTTACCC Num.seqs=9  
 Similarity=0.765898  
 1 ATTGGTTACCCGTTG-GCGGATTTACGTGGACTCGGTCACCTTTCGGCNTG

\*\*\*\*\* \*\*\*\* \*\* \*\*\*\*\* \* \*\*\*\*\*  
 Consensus:

ATTGGTTACCCgGTTGcGCgGATTTACccGgACTCGGTCACCTTTcGGCNTG

>Bacillus\_Fam\_287\_52\_3 Nr. of seq. 3 Alignment length(with gaps) = 53  
Alignment score = 0.633124

GCF\_001591665.1\_ASM159166v1\_genomic.fna\_53:52093-52301 Satlength=209 Nr  
of Repeats=4 RepeatLength=52 seed=TTAAAGACAT Num.seqs=4  
Similarity=0.792977

0 TTAAAGACATTTTGAGC-ACATTGATGGGCAGTTATGTCTTTAAGAAAGGCTA

GCF\_001591665.1\_ASM159166v1\_genomic.fna\_91:5115-5323 Satlength=209 Nr of  
Repeats=4 RepeatLength=52 seed=ATTAAAGACA Num.seqs=4 Similarity=0.752058

51 TTAAAGACATTTTGGTG-GGTAAGACAGGGAGTTTGTCTTTAAGGAGGGCTA

GCF\_001591665.1\_ASM159166v1\_genomic.fna\_54:84694-84902 Satlength=209 Nr  
of Repeats=4 RepeatLength=52 seed=GTATTAAAGA Num.seqs=4  
Similarity=0.876068

49 TTAAAGACATTTT-AGCTATTTTGTAGAGGTGGTTTGTCTTAAGAAGGGGTA

\*\*\*\*\* \* \* \*\* \*\*\* \*\*\*\*\* \* \*\* \*

Consensus:

TTAAAGACATTTTgagCantttgAnaGGNaGTTtTGTCTTTAAGaAgGGcTA

>Bacillus\_Fam\_288\_52\_3 Nr. of seq. 3 Alignment length(with gaps) = 53  
Alignment score = 0.731656

GCF\_001591805.1\_ASM159180v1\_genomic.fna\_5:182944-183204 Satlength=261 Nr  
of Repeats=5 RepeatLength=52 seed=CTTATAAGCT Num.seqs=5  
Similarity=0.851572

0 CTTATAAGCTACCCAACCTGGATGATTTTCTCGGTTTCGGTAGCTTATAC-CT

GCF\_001591805.1\_ASM159180v1\_genomic.fna\_68:9875-10082 Satlength=208 Nr of  
Repeats=4 RepeatLength=52 seed=TTATAAGCTA Num.seqs=3 Similarity=0.880342

1 CTTATAAGCTACCCAACCTGGGCGGCTTTCTCGGTTTCGGTCGCTTATAC-CC

Rev.of\_GCF\_001591805.1\_ASM159180v1\_genomic.fna\_63:307-671 Satlength=365  
Nr of Repeats=7 RepeatLength=52 seed=AAGTTGGGTA Num.seqs=7  
Similarity=0.865690

18

-TTATAAGCTACCCAACCTCCGCAAATCCCNCGGCTTCGGTCGCTTATACACC

\*\*\*\*\* \* \* \*\*\* \*\*\*\*\* \*\*\*\*\* \*

Consensus:

cTTATAAGCTACCCAACCTTgggcganTttCtCGGtTTCGGTcGCTTATACCc

>Bacillus\_Fam\_289\_52\_3 Nr. of seq. 3 Alignment length(with gaps) = 53  
Alignment score = 0.645702

GCF\_001636315.1\_ASM163631v1\_genomic.fna\_1:834005-834369 Satlength=365 Nr  
of Repeats=7 RepeatLength=52 seed=AAAGTGTTTC Num.seqs=7  
Similarity=0.796002

0 AAAGTGTTTCCAATCAAGGCTATTGGCGACATAACTCAGTATAAAAANNTGA-

GCF\_001636315.1\_ASM163631v1\_genomic.fna\_1:4300776-4301088 Satlength=313  
Nr of Repeats=6 RepeatLength=52 seed=GCGACAAAAC Num.seqs=6  
Similarity=0.704527

25

GAAGTGATCCAATGAAGGCTATTGGCGACAAAACCTCTGTTGGAAAAGGGGC-

GCF\_001636315.1\_ASM163631v1\_genomic.fna\_1:3938063-3939308 Satlength=1246  
Nr of Repeats=11 RepeatLength=52 seed=TGGAAACAAA Num.seqs=9

Similarity=0.925926 22  
-AAATGTTTCCAATGAGGGCTATTGGAAACAAAACCTCACGAAGAAAGCGGGAG

\*\* \*\*\* \*\*\*\*\* \* \*\*\*\*\* \*\*\* \*\*\*\*\* \*\*\* \*

Consensus:

nAAgTGtTtCCAATgAaGGCTATTGGcgACAaAACTCagtangAAAanggGa

>Bacillus\_Fam\_290\_52\_3 Nr. of seq. 3 Alignment length(with gaps) = 53  
Alignment score = 0.607966  
GCF\_001636315.1\_ASM163631v1\_genomic.fna\_1:2347811-2348434 Satlength=624  
Nr of Repeats=12 RepeatLength=52 seed=TGGAATCACT Num.seqs=11  
Similarity=0.844289 0  
TGGAATCACTTTTCTC-TNTTTTTCTCCNAGTTTTGTTTCCAATGACCCTGAT  
Rev.of\_GCF\_001636315.1\_ASM163631v1\_genomic.fna\_1:3352830-3353038  
Satlength=209 Nr of Repeats=4 RepeatLength=52 seed=GCGACAAAAG Num.seqs=4  
Similarity=0.880342 39  
TGGATTCACTTTACTC-TCTTTTGCTCCGGCTTTTGTGCGCCAATAGCCTTCAT  
GCF\_001636315.1\_ASM163631v1\_genomic.fna\_1:3814968-3815747 Satlength=780  
Nr of Repeats=15 RepeatLength=52 seed=TTGGAAACAC Num.seqs=14  
Similarity=0.832884 51  
TGGAAACACTTTACTCGTATTTT-CACAGAGATTTGTTTCCAATAGGTGCGAT

\*\*\*\* \*\*\*\*\* \*\*\* \* \*\*\*\*\* \* \* \*\*\*\*\* \*\*\*\*\* \*\*

Consensus:

TGGAatCACTTTaCTCTnTTTTnTtCcgagtTTTGtTtCCAATagccntgAT

>Bacillus\_Fam\_291\_52\_3 Nr. of seq. 3 Alignment length(with gaps) = 53  
Alignment score = 0.714885  
GCF\_002019645.1\_ASM201964v1\_genomic.fna\_1:115528-116203 Satlength=676 Nr  
of Repeats=13 RepeatLength=52 seed=GCTGTCCGAA Num.seqs=12  
Similarity=0.753627 0  
GCTGTCCGAAGTTGGCTGAGGTTGAGACAGCTTGAGGAACAAAAGAGAGAAA-  
GCF\_002019645.1\_ASM201964v1\_genomic.fna\_1:2536105-2536365 Satlength=261  
Nr of Repeats=5 RepeatLength=52 seed=AAGAGGAAAA Num.seqs=5  
Similarity=0.929560 42  
GCTGTCCGAAGTGAGGTGAGGTTGAGACAGGTTGAGGGTGAGAAGAG-GAAAA  
Rev.of\_GCF\_002019645.1\_ASM201964v1\_genomic.fna\_1:4937598-4938897  
Satlength=1300 Nr of Repeats=25 RepeatLength=52 seed=TACTTCGGAC  
Num.seqs=24 Similarity=0.864549  
65 GCTGTCCGAAGTAGAGTGAGGTTGAGACAGCTTTGGTGTGCGAAGNG-GAAAA

\*\*\*\*\* \* \* \*\*\*\*\* \*\* \* \*\*\* \* \*\*\*\*

Consensus:

GCTGTCCGAAGTnGagTGAGGTTGAGACAGcTTgaGggtgagAAGaGGAAAAa

>Bacillus\_Fam\_292\_52\_3 Nr. of seq. 3 Alignment length(with gaps) = 53  
Alignment score = 0.704403  
GCF\_002019645.1\_ASM201964v1\_genomic.fna\_1:995262-996146 Satlength=885 Nr  
of Repeats=17 RepeatLength=52 seed=AAGGTTCCGA Num.seqs=17  
Similarity=0.819570 0  
AAGGTTCCGACAGCTTTTGCTCGAAG-GCCCTCGAAGTTGTCCGAAGTNGCCC

Rev.of\_GCF\_002019645.1\_ASM201964v1\_genomic.fna\_1:4106739-4107991  
 Satlength=1253 Nr of Repeats=24 RepeatLength=52 seed=ACTTCGGACA  
 Num.seqs=20 Similarity=0.924831  
 47 AAGGTTTCGGACAGCTTTAGCTTCCGG-GCATTCTGAAGTTGTCCGAAGTCGCTC  
 Rev.of\_GCF\_002019645.1\_ASM201964v1\_genomic.fna\_1:4426732-4427356  
 Satlength=625 Nr of Repeats=12 RepeatLength=52 seed=ACTTCGGACA  
 Num.seqs=12 Similarity=0.829060  
 47 GGGGTTTCGGACAGCTTTTGGTCTCAGAGGA-TCGAAGTTGTCCGAAGTTGTTC

\*\*\*\*\* \* \* \* \* \*\*\*\*\* \* \*

Consensus:

aaGGTTCGGACAGCTTTtGcTcncaGGcanTCGAAGTTGTCCGAAGTnGctC

>Bacillus\_Fam\_293\_52\_3 Nr. of seq. 3 Alignment length(with gaps) = 53  
 Alignment score = 0.637317  
 GCF\_900104555.1\_IMG-  
 taxon\_2651870172\_annotated\_assembly\_genomic.fna\_20:557960-558325  
 Satlength=366 Nr of Repeats=7 RepeatLength=52 seed=GTCTGAAGTC Num.seqs=6  
 Similarity=0.732510 0 GTCTGAAGTC-  
 ACCTTAGGTTTCAGACACAGTTGCATGTGAAATCACCAATCCT  
 Rev.of\_GCF\_900104555.1\_IMG-  
 taxon\_2651870172\_annotated\_assembly\_genomic.fna\_22:368575-368885  
 Satlength=311 Nr of Repeats=6 RepeatLength=52 seed=CTTCAGACAG Num.seqs=4  
 Similarity=0.635288 8 GTCTGAAGTC-  
 AGGNTAGGTTTCGGACACGCTTGGATTTGAAATCGCTGATCCT  
 GCF\_900104555.1\_IMG-  
 taxon\_2651870172\_annotated\_assembly\_genomic.fna\_22:384819-385184  
 Satlength=366 Nr of Repeats=7 RepeatLength=52 seed=GTCTGAAGT Num.seqs=6  
 Similarity=0.741090 51 GTCTGAAGTCGACCCTA-  
 GTTCGGACTCTGGTGCACCTTGCAATCACTTCTCTT

\*\*\*\*\* \* \*\* \*\*\*\* \* \* \* \* \*\* \* \*\* \* \* \*\* \*

Consensus:

GTCTGAAGTCAccnTAgGTTcGACaCngtTGcAttTGaAATCaCtnaTCcT

>Bacillus\_Fam\_294\_51\_3 Nr. of seq. 3 Alignment length(with gaps) = 52  
 Alignment score = 0.651709  
 GCF\_002019605.1\_ASM201960v1\_genomic.fna\_1:184216-184471 Satlength=256 Nr  
 of Repeats=5 RepeatLength=51 seed=TATAAGGAAG Num.seqs=3  
 Similarity=0.839744  
 0 TATAAGGAAGTGATGAGTGCTAAAAGTCAGGATAGCTCATGA-TATTACCAG  
 Rev.of\_GCF\_002019605.1\_ASM201960v1\_genomic.fna\_1:1956898-1957102  
 Satlength=205 Nr of Repeats=4 RepeatLength=51 seed=CCTCATACTG Num.seqs=4  
 Similarity=0.930283 7  
 TATGAGGAAGAAATGAGCGCTAAAGCGAAAGATAGAACACTA-TATTACCAG  
 GCF\_002019605.1\_ASM201960v1\_genomic.fna\_1:4935750-4936209 Satlength=460  
 Nr of Repeats=9 RepeatLength=51 seed=AGTGCTAAAG Num.seqs=9  
 Similarity=0.852578 15  
 TATAAGTAAGAAATGAGTGCTAAAGCGAGGATAGAGC-TTATTGTTTCCAG

\*\*\* \*\* \* \* \* \* \* \* \* \* \* \* \* \* \* \* \*

Consensus:

```
>Bacillus_Fam_295_52_3  Nr. of seq. 3 Alignment length(with gaps) = 52
Alignment score = 0.707265
GCF_000169195.2_ASM16919v2_genomic.fna_1:649385-650061 Satlength=677 Nr
of Repeats=13 RepeatLength=52 seed=TTAAGGAAGA Num.seqs=13
Similarity=0.725689
TTAAGGAAGATCGAAAAAATCGTCCCTTTCTTAACGTAGANCCGTTCTACG
Rev.of_GCF_000169195.2_ASM16919v2_genomic.fna_1:669488-670145
Satlength=658 Nr of Repeats=10 RepeatLength=52 seed=CTTCCTTAAC
Num.seqs=7 Similarity=0.743590
9 TTAAGGAAGNCCGNNAAAAAGNCNCGCTATCTTAACGTAGAGGCGTTCTATG
GCF_000169195.2_ASM16919v2_genomic.fna_1:2578666-2579497 Satlength=832 Nr
of Repeats=15 RepeatLength=52 seed=GTAAAGGAAG Num.seqs=13
Similarity=0.728270
TAAAGGAAGNCCGCAAAAAGTGTGTCTATCTTAACATAGAGGCGTTCTANG
```

\* \* \* \* \*

Consensus:

TtAAGGAAGncCGnnAAAAgngt cnCTaTCTTAACgTAGAggCGTTCTAnG

```
>Bacillus_Fam_296_52_3  Nr. of seq. 3 Alignment length(with gaps) = 52
Alignment score = 0.841880
GCF_000171615.1_ASM17161v1_genomic.fna_52:43-615 Satlength=573 Nr of
Repeats=10 RepeatLength=52 seed=GGCGCGCTTA  Num.seqs=9
Similarity=0.811321
0      GGCGCGCTTACCCTAGCGCGNGGCTCTTCTCTCTTTTTTCTTCTTCTTGGGA
GCF_000171615.1_ASM17161v1_genomic.fna_60:29-599 Satlength=571 Nr of
Repeats=8 RepeatLength=52 seed=GCGCTTACCC  Num.seqs=5 Similarity=0.892308
3      GGCGCGCTTACCCTAACGCGGGGCTCTTCTCCCTTTTTTCTTCTTCTTGGGA
Rev.of_GCF_000171615.1_ASM17161v1_genomic.fna_130:149-408 Satlength=260
Nr of Repeats=5 RepeatLength=52 seed=AAGAAGAAAA  Num.seqs=4
Similarity=0.846154
GGGGCGCTGTCCCAAGCGCGTGTCTCTTCTCTCTTTTTTCTTCTTCTTGGGG
```

Consensus:

GGcGCGCTtaCCcTAqCGCGnGqCTCTTCTCtCTTTTTCTTCTTCTTGGGa

```
>Bacillus_Fam_297_52_3  Nr. of seq. 3 Alignment length(with gaps) = 52
Alignment score = 0.675214
GCF_000177235.2_ASM17723v2_genomic.fna_1:726998-727934 Satlength=937 Nr
of Repeats=18 RepeatLength=52 seed=AAGCGTGTCA  Num.seqs=18
Similarity=0.904475
AAGCGTGTCCATACGAAGGCAATGCCGCATGAAAAATCGGGACGCAGGAAATA
Rev.of_GCF_000177235.2_ASM17723v2_genomic.fna_1:4063448-4064381
Satlength=934 Nr of Repeats=18 RepeatLength=52 seed=CATTGCTCTC
Num.seqs=15 Similarity=0.906227
23  AAGCGTGTCCATACGAGAGCAATGCCACATGAAAAAAGCAAACAAGCAAATA
Rev.of_GCF_000177235.2_ASM17723v2_genomic.fna_1:1193617-1194293
Satlength=677 Nr of Repeats=13 RepeatLength=52 seed=ATGTGTCATT
```



Num.seqs=9 Similarity=0.752970  
29 ACNCGTGTGCATACAAGGNCAATGACACATGAAAAATAAGAAGCAATCCAATA

\* \*\*\*\*\* \* \*\*\*\*\* \* \*\*\*\*\* \* \* \*\*\*\*

Consensus:

AagCGTGTGCATACgAgggCAATGcCaCATGAAAAAtaggaAncaAgcaAATA

>Bacillus\_Fam\_298\_52\_3 Nr. of seq. 3 Alignment length(with gaps) = 52  
Alignment score = 0.688034  
GCF\_000374565.1\_ASM37456v1\_genomic.fna\_3:72207-73350 Satlength=1144 Nr of  
Repeats=22 RepeatLength=52 seed=AAACGGTAAC Num.seqs=21  
Similarity=0.805750  
0 AAACGGTAAC TAATCGTGGGGAAATGTTCCCGTTTTGTGCCTGAGTTCGAAC  
GCF\_000374565.1\_ASM37456v1\_genomic.fna\_16:37328-37794 Satlength=467 Nr of  
Repeats=9 RepeatLength=52 seed=GAAAAAACGG Num.seqs=7 Similarity=0.672252  
48 AAACGGGAAC TAATCGTGAGGAAAGGTTACCGGTTGGGGCCCGTGTNGAAA  
GCF\_000374565.1\_ASM37456v1\_genomic.fna\_3:246080-246600 Satlength=521 Nr  
of Repeats=10 RepeatLength=52 seed=CGGTAACTAA Num.seqs=8  
Similarity=0.785827  
3 AACCGGTAACTAATGGAGAAGAAAGGTGCCCCGCTTTGTGTCCGATTTCGAAA

\*\* \*\*\* \*\*\*\*\* \* \* \*\*\*\*\* \*\* \*\*\* \*\* \* \* \* \* \*\* \*\*\*

Consensus:

AAaCGGtAACTAATcGtGagGAAAgGTtcCCGnTTtGtGcCcGagTTcGAAa

>Bacillus\_Fam\_299\_52\_3 Nr. of seq. 3 Alignment length(with gaps) = 52  
Alignment score = 0.846154  
GCF\_000708755.2\_ASM70875v2\_genomic.fna\_1:102871-103131 Satlength=261 Nr  
of Repeats=4 RepeatLength=52 seed=AAAGTGTTC T Num.seqs=3  
Similarity=0.752621  
0 AAAGTGTTC TAANCCAGAGTAAGCAGCACAAAGTGAGTAGANCACAGGCTCG  
GCF\_000709935.2\_ASM70993v2\_genomic.fna\_1:103820-104028 Satlength=209 Nr  
of Repeats=4 RepeatLength=52 seed=CAAAGTGT T Num.seqs=4  
Similarity=0.786325  
50 AAAGTGTTC TAAACCAGAGTTAGCAGCACAAACTGAGTAGAGCACAGGCCCA  
Rev.of\_GCF\_000708755.2\_ASM70875v2\_genomic.fna\_6:383976-384236  
Satlength=261 Nr of Repeats=5 RepeatLength=52 seed=TGCTAACTCT Num.seqs=5  
Similarity=0.853846 25  
AAAGTGTTC TAACCCAGAGTTAGCAGCACAAAGTGAGTAGAGCCCGGTCCCG

\*\*\*\*\* \*\*\*\*\* \*\*\*\*\* \*\*\*\*\* \* \* \* \* \*

Consensus:

AAAGTGTTC TAAnCCAGAGTtAGCAGCACAAAgTGAGTAGAgCaCaGgCcCg

>Bacillus\_Fam\_300\_52\_3 Nr. of seq. 3 Alignment length(with gaps) = 52  
Alignment score = 0.811966  
GCF\_000708755.2\_ASM70875v2\_genomic.fna\_1:366565-366877 Satlength=313 Nr  
of Repeats=6 RepeatLength=52 seed=GAGTTTGTGC Num.seqs=6  
Similarity=0.782906  
0 GAGTTTGTGCTGCTAAATCATGTATAGAACACTTTCGGCNGGGCCCCGCACT

Rev.of\_GCF\_000708755.2\_ASM70875v2\_genomic.fna\_2:47476-47840 Satlength=365  
 Nr of Repeats=7 RepeatLength=52 seed=ATGAGTTAGC Num.seqs=7  
 Similarity=0.841858 21  
 GAGTTTATGCTGCTAACTCATGTTTGAACACTTTTCGCCGCGACCCGCACC  
 Rev.of\_GCF\_000709935.2\_ASM70993v2\_genomic.fna\_24:86775-87035  
 Satlength=261 Nr of Repeats=5 RepeatLength=52 seed=TAGCAGCACA Num.seqs=5  
 Similarity=0.856410 67  
 GAGTTTGTGCTGCTAACTCTTGTGTTGAACACTTTNGCCGTGGACCCGCACC

\*\*\*\*\* \*\* \*\*\* \* \*\*\*\*\* \* \* \*\* \*\*\*\*\*

Consensus:

GAGTTTgTGCTGCTAAcTCaTGtTgGAACACTTTcGcCgnGGaCCCGCACc

>Bacillus\_Fam\_301\_52\_3 Nr. of seq. 3 Alignment length(with gaps) = 52  
 Alignment score = 0.809829  
 GCF\_000708755.2\_ASM70875v2\_genomic.fna\_6:144195-144506 Satlength=312 Nr  
 of Repeats=6 RepeatLength=52 seed=AAGGGTCATA Num.seqs=5  
 Similarity=0.784615  
 0 AAGGGTCATAANGACACATGATTTAACCCCTTCAGCATGAAGGAAACTCCGTG  
 GCF\_000709935.2\_ASM70993v2\_genomic.fna\_15:61477-61788 Satlength=312 Nr of  
 Repeats=6 RepeatLength=52 seed=TGAAGGGTCA Num.seqs=5 Similarity=0.797436  
 50 AAGGGTCATAANGACACATGATTTAACCCCTTCAGCATGAAGGAAACTCCGTG  
 Rev.of\_GCF\_000709935.2\_ASM70993v2\_genomic.fna\_2:33696-33956 Satlength=261  
 Nr of Repeats=5 RepeatLength=52 seed=CATGCTGAAG Num.seqs=5  
 Similarity=0.842593 38  
 AAAGGTCATAAGCCCGCGTGATATAACCCTTCAGCATGAAGGAGAGTGTGTG

\*\* \*\*\*\*\* \* \* \*\*\*\* \*\*\*\*\* \* \* \*\*\*

Consensus:

AAgGGTCATAAngaCaCaTGATtTAACCCTTCAGCATGAAGGAaAcTccGTG

>Bacillus\_Fam\_302\_52\_3 Nr. of seq. 3 Alignment length(with gaps) = 52  
 Alignment score = 0.760684  
 GCF\_000759675.1\_ASM75967v1\_genomic.fna\_13:117550-117862 Satlength=313 Nr  
 of Repeats=6 RepeatLength=52 seed=CTGGAGTGAC Num.seqs=6  
 Similarity=0.935043  
 0 CTGGAGTGACCGTAGATCATATAGAAAATGCTTTTGGGTCAATGCAGATAGG  
 Rev.of\_GCF\_000759675.1\_ASM75967v1\_genomic.fna\_19:541006-541370  
 Satlength=365 Nr of Repeats=7 RepeatLength=52 seed=TTCCGGTCACT Num.seqs=7  
 Similarity=0.868132 14  
 CTGGAGTGACCGAAAAGCATGTAAAAAAGGCATATGGGTCAATGCAGGAAGT  
 GCF\_000759675.1\_ASM75967v1\_genomic.fna\_136:8346-8709 Satlength=364 Nr of  
 Repeats=7 RepeatLength=52 seed=GAGTGACCGA Num.seqs=6 Similarity=0.781197  
 55 CTGGAGTGACCGAAAAGCATTAGGAAAAGCATTGGGTCAATGCAGATAGT

\*\*\*\*\* \* \* \*\*\* \* \*\*\*\* \* \*\*\*\*\* \*\*

Consensus:

CTGGAGTGACCGaAaAgCATntAgaAAAnGCaTtTGGGTCAATGCAGatAGt

>Bacillus\_Fam\_303\_52\_3 Nr. of seq. 3 Alignment length(with gaps) = 52  
 Alignment score = 0.713675

GCF\_000813125.1\_ASM81312v1\_genomic.fna\_102:117072-117487 Satlength=416 Nr of Repeats=8 RepeatLength=52 seed=GACAGCTTTG Num.seqs=7  
 Similarity=0.807082 0  
 GACAGCTTTGAAGGAAATCAGCGTAAAGCTGTCTGAACTTGGTGCTACTTCT  
 Rev.of\_GCF\_000934845.1\_ASM93484v1\_genomic.fna\_83:5-265 Satlength=261 Nr of Repeats=5 RepeatLength=52 seed=GTCCGAAGTA Num.seqs=5  
 Similarity=0.713333  
 3 GACTACTTTTACGGAAAAAGGCGGAAACCTGTCCGAACCTGGGCNTACTTCG  
 Rev.of\_GCF\_000934845.1\_ASM93484v1\_genomic.fna\_94:227-539 Satlength=313 Nr of Repeats=6 RepeatLength=52 seed=GCAAAAGCAG Num.seqs=6  
 Similarity=0.862055 12  
 GACTGCTTTTGCGGAAAAAGGCGGAAAGTGGTCCGAACCTGGGGCTACTTCG

\*\*\* \*\*\*\* \*\*\*\*\* \*\*\* \*\*\* \*\*\* \*\*\*\*\* \*\*\*\*\*

Consensus:

GACtgCTTTtacGGAAAaagGCGgAAAgctGTCcGAACTTGggcTACTTCg

>Bacillus\_Fam\_304\_52\_3 Nr. of seq. 3 Alignment length(with gaps) = 52  
 Alignment score = 0.675214  
 GCF\_001375535.1\_Bacillus\_niameyensis\_genomic.fna\_6:3162845-3163209  
 Satlength=365 Nr of Repeats=7 RepeatLength=52 seed=AATCGTTACC Num.seqs=7  
 Similarity=0.782775 0  
 AATCGTTACCGTTTTACATGAGAGCACGTCAAGACGGTAACGAATCAGAGCN  
 Rev.of\_GCF\_001375535.1\_Bacillus\_niameyensis\_genomic.fna\_6:4427320-4431322  
 Satlength=4003 Nr of Repeats=77 RepeatLength=52 seed=TGAATCGTTC  
 Num.seqs=75 Similarity=0.994622 47  
 AATCGTTACCTTTTCATATGCGATCACCGCAATACGGGAACGATTCAGAGCC  
 GCF\_001375535.1\_Bacillus\_niameyensis\_genomic.fna\_6:4422988-4423300  
 Satlength=313 Nr of Repeats=6 RepeatLength=52 seed=GGTAACGATT Num.seqs=6  
 Similarity=0.769231 35  
 AATCGTGCCCGTTTCGGATGGGANACGGCAACATGGTAACGATTCGGAGTG

\*\*\*\*\* \*\* \*\*\* \*\*\* \*\* \*\*\* \*\*\* \* \*\* \*\*\*\*\* \*\* \*\*\*

Consensus:

AATCGTtaCCgTTTcanATGnGAnCACggCAAnAcGGtAACGAtTCaGAGcn

>Bacillus\_Fam\_305\_52\_3 Nr. of seq. 3 Alignment length(with gaps) = 52  
 Alignment score = 0.705128  
 GCF\_001439915.1\_ASM143991v1\_genomic.fna\_83:493100-493309 Satlength=210 Nr of Repeats=4 RepeatLength=52 seed=GGCTTATTCG Num.seqs=3  
 Similarity=0.914530 0  
 GGCTTATTCGGACAGAACAAGCAAGAAATGCCAATAGAGAGTCCGAATGCAA  
 GCF\_001439915.1\_ASM143991v1\_genomic.fna\_116:79569-79934 Satlength=366 Nr of Repeats=7 RepeatLength=52 seed=ATTCGGACAG Num.seqs=6  
 Similarity=0.789744  
 5 GGCTAATTCGGACAGGACAAGCGGAAAAAGTCGGTAGAGAGTCCGAATGCAA  
 GCF\_001439915.1\_ASM143991v1\_genomic.fna\_123:290092-290300 Satlength=209  
 Nr of Repeats=4 RepeatLength=52 seed=ATTTGGACAG Num.seqs=4  
 Similarity=0.586420 5  
 GGTTCATTTGGACAGACCAATGTAGAACTGCCGNTAGAGAGTCCAAATGCAA

\*\* \* \*\*\* \*\*\*\*\* \*\*\* \*\* \* \* \*\*\*\*\* \*\*\*\*\*

Consensus:

GGcTnATTcGGACAGaaCAAgcnagAAatGcCgnTAGAGAGTCCgAATGCAA

>Bacillus\_Fam\_306\_52\_3 Nr. of seq. 3 Alignment length(with gaps) = 52  
Alignment score = 0.726496  
GCF\_001439965.1\_ASM143996v1\_genomic.fna\_56:1630-1890 Satlength=261 Nr of  
Repeats=4 RepeatLength=52 seed=TGATTGATTA Num.seqs=3 Similarity=0.794872  
0 TGATTGATTACCCTGAAGGNGAAAATTGCATGTGTACGGGAACCATANAGAG  
GCF\_002009555.1\_ASM200955v1\_genomic.fna\_109:9635-9947 Satlength=313 Nr of  
Repeats=5 RepeatLength=52 seed=TGATTGATTA Num.seqs=4 Similarity=0.854701  
0 TGATTGATTACCCTGAAGATGAAAATTGCATGTGTACGGGAACCATACAGAG  
Rev.of\_GCF\_002009555.1\_ASM200955v1\_genomic.fna\_27:20337-20857  
Satlength=521 Nr of Repeats=10 RepeatLength=52 seed=AGGGTAACCA  
Num.seqs=10 Similarity=0.871225  
14 GGTTTGGTTACCCTGTTGATGGAAATTGCGCCTGTACGGTAACCAATGGGAG

\* \*\*\* \*\*\*\*\* \* \* \*\*\*\*\* \*\*\*\*\* \*\*\*\*\* \*\*\*

Consensus:

tGaTTGaTTACCCTGaaGatGaAAATTGCatgTGTACGGgAACCAatanaGAG

>Bacillus\_Fam\_307\_52\_3 Nr. of seq. 3 Alignment length(with gaps) = 52  
Alignment score = 0.899573  
GCF\_001439965.1\_ASM143996v1\_genomic.fna\_108:192897-193886 Satlength=990  
Nr of Repeats=20 RepeatLength=52 seed=GGTAACCATT Num.seqs=17  
Similarity=0.698483 0  
GGTAACCATTGANGGACTTTGGTGACCCTTTTGGNGGAAAACTCCTTTTCNTC  
GCF\_001887185.1\_ASM188718v1\_genomic.fna\_193:64604-65229 Satlength=626 Nr  
of Repeats=12 RepeatLength=52 seed=AAACTCCTTT Num.seqs=11  
Similarity=0.767366 38  
GGTAACCATTGAGGGCCTTTGGTGACCCTTTNGGNGGAAAACTCCTTTCTTC  
Rev.of\_GCF\_002009555.1\_ASM200955v1\_genomic.fna\_553:44922-45390  
Satlength=469 Nr of Repeats=8 RepeatLength=52 seed=AAAGGAGTTT Num.seqs=6  
Similarity=0.735185 48  
GGTAACCATTGTGGGCCTTTGGTGACCCTTTGGGNGGAAAACTCCTTTCTTC

\*\*\*\*\* \*\* \*\*\*\*\* \*\*\*\*\* \*\*\*\*\* \*\*

Consensus:

GGTAACCATTGagGGcCTTTGGTGACCCTTTnGGNGGAAAACTCCTTTCTTC

>Bacillus\_Fam\_308\_52\_3 Nr. of seq. 3 Alignment length(with gaps) = 52  
Alignment score = 0.929487  
GCF\_001439965.1\_ASM143996v1\_genomic.fna\_121:22311-22571 Satlength=261 Nr  
of Repeats=5 RepeatLength=52 seed=AGAAAGAGGA Num.seqs=5  
Similarity=0.887179  
0 AGAAAGAGGAAGAAAGGTAACCAATCGCCCGAAAGGTTCCCGAAACACGAA  
GCF\_001887185.1\_ASM188718v1\_genomic.fna\_194:35985-36921 Satlength=937 Nr  
of Repeats=18 RepeatLength=52 seed=AAAGAAAGAG Num.seqs=18  
Similarity=0.771074 50  
AGAAAGAGGAAGAAAGGTAACCAATCGCTCGGAAAGGTTACCGAAACTNGAA  
GCF\_002009555.1\_ASM200955v1\_genomic.fna\_16:8263-9199 Satlength=937 Nr of  
Repeats=18 RepeatLength=52 seed=AAAGAAAGAG Num.seqs=18

Similarity=0.771074  
50 AGAAAGAGGAAGAAAGGTAACCAATCGCTCGGAAAGGTTACCGAAACTNGAA

\*\*\*\*\*  
Consensus:

AGAAAGAGGAAGAAAGGTAACCAATCGCtCGGAAAGGTTaCCGAAACtnGAA

>Bacillus\_Fam\_309\_52\_3 Nr. of seq. 3 Alignment length(with gaps) = 52  
Alignment score = 0.739316  
GCF\_001439965.1\_ASM143996v1\_genomic.fna\_121:87820-88132 Satlength=313 Nr  
of Repeats=6 RepeatLength=52 seed=TTGAAACACA Num.seqs=6  
Similarity=0.820513  
0 TTGAAACACATTATAAGAGAATATTAGAGAAAATGTGTCTCAAGTATAGTGT  
Rev.of\_GCF\_001439965.1\_ASM143996v1\_genomic.fna\_124:121491-121767  
Satlength=277 Nr of Repeats=5 RepeatLength=52 seed=CAAAATGTGT Num.seqs=3  
Similarity=0.773663 15  
TGGATACACATTTTGTGNTAGAAATATTGCGGATAATGTGTCTCAAGGATGGCGG  
Rev.of\_GCF\_001887185.1\_ASM188718v1\_genomic.fna\_148:130132-130548  
Satlength=417 Nr of Repeats=8 RepeatLength=52 seed=CAAAATGTGT Num.seqs=6  
Similarity=0.878632 15  
TGGATACACATTTTGTGCGAGAATATTGCAGATAATCTGTCTCAAGGATGGCGG

\* \* \* \* \*  
Consensus:

TgGAtACACATTTtTgngAGAATATTgcaGAtAATgTGTCTCAAGgATgGcGg

>Bacillus\_Fam\_310\_52\_3 Nr. of seq. 3 Alignment length(with gaps) = 52  
Alignment score = 0.982906  
GCF\_001439965.1\_ASM143996v1\_genomic.fna\_122:46240-46602 Satlength=363 Nr  
of Repeats=7 RepeatLength=52 seed=CTTAAATAGA Num.seqs=6  
Similarity=0.780606  
0 CTTAAATAGAGGAAACCAAGTGTGTAGGGTAACTAAAGCGAGCGAAAGGTTA  
Rev.of\_GCF\_001887185.1\_ASM188718v1\_genomic.fna\_62:176111-176735  
Satlength=625 Nr of Repeats=12 RepeatLength=52 seed=TTTAAGTAAC  
Num.seqs=12 Similarity=0.876845  
6 CTTAAATAGAGGAAACCAGGTGTGTAGGGTAACTAAAGCGAGCGAAAGGTTA  
Rev.of\_GCF\_002009555.1\_ASM200955v1\_genomic.fna\_91:21-333 Satlength=313 Nr  
of Repeats=6 RepeatLength=52 seed=TTTAAGTAAC Num.seqs=6  
Similarity=0.873504 6  
CTTAAATAGAGGAAACCAGGTGTGTAGGGTAACTAAAGCGAGCGAAAGGTTA

\*\*\*\*\*  
Consensus:

CTTAAATAGAGGAAACCAgGTGTGTAGGGTAACTAAAGCGAGCGAAAGGTTA

>Bacillus\_Fam\_311\_52\_3 Nr. of seq. 3 Alignment length(with gaps) = 52  
Alignment score = 0.730769  
GCF\_001439965.1\_ASM143996v1\_genomic.fna\_125:170548-171172 Satlength=625  
Nr of Repeats=11 RepeatLength=52 seed=TGGTTACCGA Num.seqs=10  
Similarity=0.670576 0  
TGGTTACCGAGTCCNCGAGATATCCACCTTCAGGGTAACCAAACANGTNTTA

GCF\_001887185.1\_ASM188718v1\_genomic.fna\_98:26215-26474 Satlength=260 Nr of Repeats=5 RepeatLength=52 seed=AAGGTTACCG Num.seqs=4  
 Similarity=0.652263  
 51 AGGTTACCGAATCCATGAGAAATCCACCTAAAGGGTAACGAAACGAGCGCAA  
 Rev.of\_GCF\_002009555.1\_ASM200955v1\_genomic.fna\_334:9897-10157  
 Satlength=261 Nr of Repeats=5 RepeatLength=52 seed=TCGGTAACCT Num.seqs=5  
 Similarity=0.744654 62  
 AGGTTACCGAATCNATGAGAAATCCACCTANAGGGTAACGAACCCAGCGCAA

\*\*\*\*\* \*\* \*\*\*\* \*\*\*\*\* \*\*\*\*\* \*\* \* \* \*  
 Consensus:

aGGTTACCGAaTCcatGAGAAATCCACCTanAGGGTAACgAAaCnaGcgcaA

>Bacillus\_Fam\_312\_52\_3 Nr. of seq. 3 Alignment length(with gaps) = 52  
 Alignment score = 0.649573  
 GCF\_001636325.1\_ASM163632v1\_genomic.fna\_1:60206-60777 Satlength=572 Nr of Repeats=11 RepeatLength=52 seed=AAAGGTAGAA Num.seqs=10  
 Similarity=0.805724  
 0 AAAGGTAGAAAGAGAGTGTGTCACGCCCATCTGAGGTAGAAAAGAGAAG  
 GCF\_001636325.1\_ASM163632v1\_genomic.fna\_2:158704-159484 Satlength=781 Nr of Repeats=15 RepeatLength=52 seed=GAAGAGCGAG Num.seqs=15  
 Similarity=0.855106 7  
 AAAGGAGAAAGAGCGAGCGTCTCATCGCCCATCTGAGCGAGAAGAAGAGTAG  
 GCF\_001636325.1\_ASM163632v1\_genomic.fna\_2:308084-308398 Satlength=315 Nr of Repeats=6 RepeatLength=52 seed=TGAAAGGAAG Num.seqs=5  
 Similarity=0.738462  
 50 AAAGGAAGAAGAGAGCACGTCTCAGCGCCCAAGTGATAGAGAATAGCCGATG

\*\*\*\*\* \*\*\*\*\* \* \*\* \*\*\* \*\*\*\*\* \*\*\* \*\*\*\*\* \* \* \*  
 Consensus:

AAAGGnAGAAGAGaGngcGTcTCAnCGCCCAtcTGAgngAGAAAnAagaGaaG

>Bacillus\_Fam\_313\_52\_3 Nr. of seq. 3 Alignment length(with gaps) = 52  
 Alignment score = 0.675214  
 GCF\_001636335.1\_ASM163633v1\_genomic.fna\_1:2043697-2044009 Satlength=313  
 Nr of Repeats=6 RepeatLength=52 seed=TATGGGACAA Num.seqs=6  
 Similarity=0.810256 0  
 TATGGGACAAAAGATTACTGATTTCTGCTAATTTTGTCCCATTGAGCTCTCC  
 GCF\_001636335.1\_ASM163633v1\_genomic.fna\_1:2271770-2272029 Satlength=260  
 Nr of Repeats=5 RepeatLength=52 seed=GTCTCATTGA Num.seqs=4  
 Similarity=0.931624 35  
 TATGGGACACTTGCTTTTCCTTTTTCAGCTTTTTTTGTCTCATTGAGCTCTCC  
 GCF\_001636335.1\_ASM163633v1\_genomic.fna\_1:2474604-2475436 Satlength=833  
 Nr of Repeats=16 RepeatLength=52 seed=TATGGGACAG Num.seqs=16  
 Similarity=0.867949 52  
 TATGGGACAGTTCCTTCGGCTTCTCGGCTTGTTTTGTCTCATTGAGCCCTCC

\*\*\*\*\* \*\* \* \*\* \*\*\* \*\*\*\*\* \*\*\*\*\* \*\*\*\*\*  
 Consensus:

TATGGGACAnttgCTTncnntTtTCnGCTtnTTTTGTCTcATTGAGCtCTCC

>Bacillus\_Fam\_314\_52\_3 Nr. of seq. 3 Alignment length(with gaps) = 52  
Alignment score = 0.982906  
GCF\_001645705.1\_ASM164570v1\_genomic.fna\_19:10035-10867 Satlength=833 Nr  
of Repeats=16 RepeatLength=52 seed=AAAAGGGAAC Num.seqs=16  
Similarity=0.930769 0  
AAAAGGGAACATAGAGTCCTTGTATGTACGCGAAACTGGTGGGAAGACTCCG  
GCF\_001645705.1\_ASM164570v1\_genomic.fna\_57:14-794 Satlength=781 Nr of  
Repeats=15 RepeatLength=52 seed=TTGTATGTAC Num.seqs=15  
Similarity=0.903804  
19 AAAAGGGAACATAGAGTCCTTGTATGTACGCGAAACTGGTGGGAAGACTCCG  
GCF\_001645705.1\_ASM164570v1\_genomic.fna\_35:14312-14884 Satlength=573 Nr  
of Repeats=11 RepeatLength=52 seed=AAAAGGGAAC Num.seqs=11  
Similarity=0.938462 0  
AAAAGGGAACATAGAGTCCTTGTATGTACGCGAAACTGGTGAGAAGACTCCG

\*\*\*\*\*  
Consensus:

AAAAGGGAACATAGAGTCCTTGTATGTACGCGAAACTGGTGgGAAGACTCCG

>Bacillus\_Fam\_315\_52\_3 Nr. of seq. 3 Alignment length(with gaps) = 52  
Alignment score = 0.946581  
GCF\_900156865.1\_PRJEB18960\_genomic.fna\_3:4195877-4197024 Satlength=1148  
Nr of Repeats=22 RepeatLength=52 seed=GAGCAAAGAA Num.seqs=20  
Similarity=0.876788 0  
GAGCAAAGAACATGTCATCATCGANCGGATGAAGACACGAATAGAGGTGTAG  
GCF\_900156865.1\_PRJEB18960\_genomic.fna\_3:4199517-4200091 Satlength=575 Nr  
of Repeats=11 RepeatLength=52 seed=TGTCATCATC Num.seqs=10  
Similarity=0.891168 12  
GAGCAAAGAACATGTCATCATCGANAGGATGAAGACACGAATAGAAGTGTAG  
GCF\_900156865.1\_PRJEB18960\_genomic.fna\_3:4202611-4202819 Satlength=209 Nr  
of Repeats=4 RepeatLength=52 seed=CAAAGAACAT Num.seqs=4  
Similarity=0.914530 55  
GAGCAAAGAACATGTCATCATCGAAAGGATGAAGACACGAATAGAAGTGTAG

\*\*\*\*\*  
Consensus:

GAGCAAAGAACATGTCATCATCGAnaGGATGAAGACACGAATAGAAgTGTAG

>Bacillus\_Fam\_316\_48\_3 Nr. of seq. 3 Alignment length(with gaps) = 48  
Alignment score = 0.981481  
GCF\_000706725.1\_ASM70672v1\_genomic.fna\_1:2952140-2952854 Satlength=715 Nr  
of Repeats=15 RepeatLength=48 seed=TTCTTCTGAT Num.seqs=10  
Similarity=0.925309 0  
TTCTTCTGATGACGTTGAGAACGACTCAGATGCTGACAGTGACGATGA  
Rev.of\_GCF\_002019765.1\_ASM201976v1\_genomic.fna\_1:1074786-1075170  
Satlength=385 Nr of Repeats=8 RepeatLength=48 seed=TCATCAGAAG Num.seqs=8  
Similarity=0.870040 12  
TTCTTCTGATGACGTTGAGAACGACTCAGATGCTGACAGTGACGATGA  
GCF\_001420645.1\_ASM142064v1\_genomic.fna\_7:5330-5618 Satlength=289 Nr of  
Repeats=6 RepeatLength=48 seed=ATTCTTCTGA Num.seqs=6 Similarity=0.874074  
47 TTCTTCTGATGACGTTGAGAACGACTCAGACGCTGACAGTGACGATGA

\*\*\*\*\*

Consensus:

TTCTTCTGATGACGTTGAGAACGACTCAGAtGCTGACAGTGACGATGA

>Bacillus\_Fam\_317\_45\_3 Nr. of seq. 3 Alignment length(with gaps) = 46

Alignment score = 0.666667

GCF\_000017425.1\_ASM1742v1\_genomic.fna\_1:1678527-1678779 Satlength=253 Nr

of Repeats=6 RepeatLength=42 seed=GAACAAAAGC Num.seqs=6

Similarity=0.841270

0 GAACAAAAGCCAGAAGATA-C-AAA-AAAACCGAATGACGAAGAC-

GCF\_000715205.1\_SOAPdenovo\_v1.05\_genomic.fna\_11:26905-27400 Satlength=496

Nr of Repeats=11 RepeatLength=45 seed=AAGCCAGACG Num.seqs=11

Similarity=0.941818

5

GCAC-AAAGCCAGACGATAGCGAAACAAAACCGATGATCAAAACG

Rev.of\_GCF\_001895885.1\_ASM189588v1\_genomic.fna\_1:3714696-3714876

Satlength=181 Nr of Repeats=5 RepeatLength=45 seed=TCTGGTTTTG Num.seqs=3

Similarity=0.637188

13

GTAC-AAAACCAGACGATAACGAAACAAAGCCGGATGACCAAAACG

\* \* \* \* \*

Consensus:

GnACAAAgCCAGAcGATAnCgAAAcAAaCCggATGAccAAaACg

>Bacillus\_Fam\_318\_40\_3 Nr. of seq. 3 Alignment length(with gaps) = 43

Alignment score = 0.666667

GCF\_000612805.1\_FF3\_genomic.fna\_1:485384-485548 Satlength=165 Nr of

Repeats=4 RepeatLength=41 seed=AATTCGCAGA Num.seqs=4 Similarity=0.902439

0 AATTCGCAGATAAGTTAT-GAGAAACCGCAGATAACAC-GTGA

GCF\_000612805.1\_FF3\_genomic.fna\_6:82591-82851 Satlength=261 Nr of

Repeats=5 RepeatLength=41 seed=GAAATTCGCA Num.seqs=4 Similarity=0.951219

39 AATTCGCAGATAAATGGT-GA-AAACCGCAGATAACTCAGTGA

Rev.of\_GCF\_000612805.1\_FF3\_genomic.fna\_2:681994-682158 Satlength=165 Nr

of Repeats=4 RepeatLength=41 seed=TATGACTTAT Num.seqs=4

Similarity=0.869919

19 AAAACGCAGATAAGTCATAGA-AATTCGCAGATAACTC-GGGG

\*\* \* \* \* \*

Consensus:

AAAttCGCAGATAAgTnaTGAAAcCGCAGATAActCGtGa

>Bacillus\_Fam\_319\_39\_3 Nr. of seq. 3 Alignment length(with gaps) = 42

Alignment score = 0.722222

GCF\_000245315.1\_ASM24531v1\_genomic.fna\_41:263357-263714 Satlength=358 Nr

of Repeats=9 RepeatLength=39 seed=ATAAAAAATC Num.seqs=6

Similarity=0.904274

0 ATAAAAAATCGTACTGTTCTCAC--AAGAGATCCCGCAGCC

GCF\_001584325.1\_ASM158432v1\_genomic.fna\_15:65449-65833 Satlength=385 Nr

of Repeats=10 RepeatLength=39 seed=CTCACAAAAG Num.seqs=8

Similarity=0.910867

18 ATAAAAAATCTTTCTGTTCTCAC--AAAAGATCTCGCAGCC



GCF\_000245335.1\_ASM24533v1\_genomic.fna\_3:546265-546469 Satlength=205 Nr  
of Repeats=5 RepeatLength=42 seed=CGCAGCTACA Num.seqs=3  
Similarity=0.894180  
35 ACAAAAAGTCTTACTGCTCTCACAAGAAAAGATCACGCAGCT

\* \*\*\*\*\* \* \* \* \* \* \*\*\*\*\* \* \* \*\*\*\*\* \*\*\*\*\*

Consensus:

AtAAAAAaTcTtTaCTGtTCTCACAAaAGATCnCGCAGCc

>Bacillus\_Fam\_320\_42\_3 Nr. of seq. 3 Alignment length(with gaps) = 42  
Alignment score = 0.978836

GCF\_000161455.1\_ASM16145v1\_genomic.fna\_1:840010-840472 Satlength=463 Nr  
of Repeats=11 RepeatLength=42 seed=GCAGAAGAGA Num.seqs=11  
Similarity=0.825108

GCAGAAGAGAAAAGTAGCAGAATTAAAACAGACGAAGCAAAAT

GCF\_000161455.1\_ASM16145v1\_genomic.fna\_1:840138-840729 Satlength=592 Nr  
of Repeats=11 RepeatLength=42 seed=AGAAGAGAAA Num.seqs=8  
Similarity=0.866213

2 GCAGAAGAGAAAAGTAGCAGAATTAAAACAGACGAAGCAAAAT

GCF\_000712615.1\_ASM71261v1\_genomic.fna\_24:59125-59698 Satlength=574 Nr of  
Repeats=13 RepeatLength=42 seed=AGAAGAGAAA Num.seqs=10  
Similarity=0.747306

2 GCAGAAGAGAAAAGTATCAGAATTAAAACAGACGAAGCAAAAT

\*\*\*\*\* \*\*\*\*\*

Consensus:

GCAGAAGAGAAAAGTAgCAGAATTAAAACAGACGAAGCAAAAT

>Bacillus\_Fam\_321\_40\_3 Nr. of seq. 3 Alignment length(with gaps) = 40  
Alignment score = 0.766667

GCF\_000374565.1\_ASM37456v1\_genomic.fna\_1:446313-446554 Satlength=242 Nr  
of Repeats=6 RepeatLength=40 seed=TAAGAGTATT Num.seqs=5  
Similarity=0.886667

0 TAAGAGTATTTCCCTAATTCCGAAGAGTTTCCCGGCAAAGT

Rev.of\_GCF\_000374565.1\_ASM37456v1\_genomic.fna\_3:243558-244159

Satlength=602 Nr of Repeats=15 RepeatLength=40 seed=GGATACTCTT

Num.seqs=14 Similarity=0.856410

31 TAAGAGTATTTCCGTTTTCCGAAGAGTATCCTCGCAAAGT

GCF\_000374565.1\_ASM37456v1\_genomic.fna\_15:92410-92570 Satlength=161 Nr of  
Repeats=4 RepeatLength=40 seed=CAAAGTAAAG Num.seqs=4 Similarity=0.900406

34 AAAGAGTATTTCTGATTTCTGAAGAGTATTCACGCAAAGT

\*\*\*\*\* \* \* \* \* \* \*\*\*\*\*

Consensus:

tAAGAGTATTTCCgatTTCCGAAGAGTaTcCncGCAAAGT

>Bacillus\_Fam\_322\_39\_3 Nr. of seq. 3 Alignment length(with gaps) = 39  
Alignment score = 0.863248

GCF\_000007825.1\_ASM782v1\_genomic.fna\_1:2224382-2224538 Satlength=157 Nr  
of Repeats=4 RepeatLength=39 seed=ACGACACCTC Num.seqs=4

Similarity=0.982906  
0 ACGACACCTCCAGCAAATAATGGAGGAGGTCAAGGAAAT  
GCF\_000008505.1\_ASM850v1\_genomic.fna\_1:2199269-2199461 Satlength=193 Nr  
of Repeats=5 RepeatLength=39 seed=GGTCAAGGAA Num.seqs=4  
Similarity=0.937322  
27 ACAACCCCTCCAGCAAATAACGGAGGAGGTCAAGGAAAT  
Rev.of\_GCF\_001645555.1\_ASM164555v1\_genomic.fna\_12:477757-477910  
Satlength=154 Nr of Repeats=4 RepeatLength=39 seed=GCTGGAGGTG Num.seqs=3  
Similarity=0.931624 14  
ACACCACCTCCAGCGAATAACGGAGGAGGCCAAGGAAAT

\*\* \* \*\*\*\*\* \*\*\*\*\* \*\*\*\*\*

Consensus:

ACaCaCCTCCAGCaAATAAcGGAGGAGGtCAAGGAAAT

>Bacillus\_Fam\_323\_39\_3 Nr. of seq. 3 Alignment length(with gaps) = 39  
Alignment score = 0.749288  
GCF\_000007845.1\_ASM784v1\_genomic.fna\_1:4522244-4522556 Satlength=313 Nr  
of Repeats=6 RepeatLength=39 seed=TCAGGGGCAA Num.seqs=4  
Similarity=0.792361  
0 TCAGGGGCAACAGAAACACTCTAAGCAAGACGACTCCGA  
GCF\_000008505.1\_ASM850v1\_genomic.fna\_1:4519171-4519561 Satlength=391 Nr  
of Repeats=10 RepeatLength=39 seed=TCTAAGCAAG Num.seqs=10  
Similarity=0.822222 19  
TCAAGGGCAACAGAAACACTCTAAGCAAGACGACTCCAA  
Rev.of\_GCF\_001645555.1\_ASM164555v1\_genomic.fna\_4:37147-37492  
Satlength=346 Nr of Repeats=9 RepeatLength=39 seed=TGATTCTGAT Num.seqs=7  
Similarity=0.873016 9  
TCAGAATCAACAACAAAACCTCTAAACAAGACAACCTCGAA

\*\*\* \*\*\*\*\* \*\* \*\*\*\*\* \*\*\*\*\* \*\*\*\*\* \*

Consensus:

TCAggggCAACAgAaAcACTCTAAgCAAGACgACTCcaA

>Bacillus\_Fam\_324\_36\_3 Nr. of seq. 3 Alignment length(with gaps) = 36  
Alignment score = 0.811728  
GCF\_000290995.1\_Baci\_cere\_AND1407\_G13175\_V1\_genomic.fna\_1:414507-414678  
Satlength=172 Nr of Repeats=5 RepeatLength=33 seed=AAGAAACAAG Num.seqs=3  
Similarity=0.919192 0 -  
AAGAAACAAGAGGAAGCAAAAAAAGCTAGAAGAG--  
Rev.of\_GCF\_000775975.1\_ASM77597v1\_genomic.fna\_1:3533346-3533562  
Satlength=217 Nr of Repeats=6 RepeatLength=36 seed=CTCTCTTCTA Num.seqs=6  
Similarity=0.871605 0  
TAAGAAGCAAGAAGAGGCGAAAAAGCTAGAAGAGAG  
Rev.of\_GCF\_000832605.1\_ASM83260v1\_genomic.fna\_1:4477135-4477387  
Satlength=253 Nr of Repeats=7 RepeatLength=36 seed=CTCTCTTCTA Num.seqs=7  
Similarity=0.890653 0  
TAAGAAACAAGAAGAGGCGAAAAAGCTAGAAGAGAG

\*\*\*\*\* \*\*\*\*\* \*\* \*\* \*\*\*\*\* \*\*\*\*\*

Consensus:

tAAGAAaCAAGAAgAgGCgAAAAAgCTAGAAGAGag

>Bacillus\_Fam\_325\_36\_3 Nr. of seq. 3 Alignment length(with gaps) = 36  
Alignment score = 0.969136  
GCF\_000706725.1\_ASM70672v1\_genomic.fna\_1:1338140-1338448 Satlength=309 Nr  
of Repeats=5 RepeatLength=36 seed=AATGCAACAA Num.seqs=4  
Similarity=0.938272 0  
AATGCAACAAGGGATGGGAGGAAACCACCATGCCCC  
GCF\_001420645.1\_ASM142064v1\_genomic.fna\_39:121221-121545 Satlength=325 Nr  
of Repeats=9 RepeatLength=36 seed=ATGCAACAAG Num.seqs=9  
Similarity=0.903292 1  
AATGCAACAAGGGATGGGAGGAAACCACCANGCCCC  
Rev.of\_GCF\_002019765.1\_ASM201976v1\_genomic.fna\_1:2724974-2725514  
Satlength=541 Nr of Repeats=15 RepeatLength=36 seed=CCTTGTTGCA  
Num.seqs=15 Similarity=0.918871  
12 AATGCAACAAGGGATGGGAGGAAACCACCACGCCCC

\*\*\*\*\*

Consensus:

AATGCAACAAGGGATGGGAGGAAACCACCAngCCCC

>Bacillus\_Fam\_326\_34\_3 Nr. of seq. 3 Alignment length(with gaps) = 35  
Alignment score = 0.615873  
GCF\_000612805.1\_FF3\_genomic.fna\_5:17272-17470 Satlength=199 Nr of  
Repeats=6 RepeatLength=33 seed=CGACGAGTAA Num.seqs=6 Similarity=1.000000  
0 CGACGAGTAATCGCAGGAGCATA--TGTTTTTTTG  
Rev.of\_GCF\_000429725.1\_ASM42972v1\_genomic.fna\_11:96592-96732  
Satlength=141 Nr of Repeats=4 RepeatLength=35 seed=TGCTCCTGCG Num.seqs=4  
Similarity=0.974603 21  
CGACGAGTAATCGCAGGAGCAAACGGGCTGTGATG  
Rev.of\_GCF\_000429725.1\_ASM42972v1\_genomic.fna\_8:26322-26492 Satlength=171  
Nr of Repeats=5 RepeatLength=34 seed=CTGCTCCTGC Num.seqs=5  
Similarity=0.898039 22  
CGACGAGGAAGCGCAGGAGCAGGC-GGTCTACATG

\*\*\*\*\* \*\* \*\*\*\*\* \*

Consensus:

CGACGAGtAAtCGCAGGAGCAnacgGtttttnaTG

>Bacillus\_Fam\_327\_25\_3 Nr. of seq. 3 Alignment length(with gaps) = 26  
Alignment score = 0.846154  
GCF\_001274775.1\_ASM127477v1\_genomic.fna\_5:147304-147704 Satlength=401 Nr  
of Repeats=16 RepeatLength=25 seed=TTGTGCCTGG Num.seqs=16  
Similarity=1.000000 0  
TTGTGCCTGGCACCTTT-TCCCCTTT  
GCF\_001274775.1\_ASM127477v1\_genomic.fna\_6:153795-153895 Satlength=101 Nr  
of Repeats=4 RepeatLength=25 seed=CCTGGCACCT Num.seqs=4  
Similarity=0.911111  
5 TTGTACCTGGCACCTTT-TCCCCTTT  
Rev.of\_GCF\_001274775.1\_ASM127477v1\_genomic.fna\_11:335137-335437  
Satlength=301 Nr of Repeats=12 RepeatLength=25 seed=AGGTGCCAGG

Num.seqs=12 Similarity=0.862179  
14 -TGTGCCTGGCACCTTTCNCCCCTTT

\*\*\* \*\*\*\*\*

Consensus:

tTGTgCCTGGCACCTTTtCCCCCTT

>Bacillus\_Fam\_328\_24\_3 Nr. of seq. 3 Alignment length(with gaps) = 24  
Alignment score = 0.759259  
GCF\_000161455.1\_ASM16145v1\_genomic.fna\_1:230973-231201 Satlength=229 Nr of  
Repeats=4 RepeatLength=24 seed=GAAACCGCCC Num.seqs=3  
Similarity=0.925926  
0 GAAACCGCCCATGCCCATACCGGG  
GCF\_000430785.1\_ASM43078v1\_genomic.fna\_57:8024-8408 Satlength=385 Nr of  
Repeats=16 RepeatLength=24 seed=CCCATTCCAG Num.seqs=16  
Similarity=0.931481  
13 GAAACCGCCCATGCCCATTCAGG  
GCF\_001636315.1\_ASM163631v1\_genomic.fna\_1:5557193-5557289 Satlength=97 Nr  
of Repeats=4 RepeatLength=24 seed=GGGTATCCAC Num.seqs=4  
Similarity=0.888889 22  
GTATCCACCCATGCCCATTGCTGG

\* \* \* \*\*\*\*\* \* \* \*

Consensus:

GaAaCCgCCCATGCCCATtcCnGG

>Bacillus\_Fam\_329\_21\_3 Nr. of seq. 3 Alignment length(with gaps) = 23  
Alignment score = 0.661836  
GCF\_000508325.1\_BAVI\_1\_genomic.fna\_8:115910-116014 Satlength=105 Nr of  
Repeats=5 RepeatLength=21 seed=TTTACTGGCG Num.seqs=4 Similarity=0.589120  
0 TTTACTGGCGGA-ATCCCCGAC-  
Rev.of\_GCF\_000508325.1\_BAVI\_1\_genomic.fna\_86:37292-37542 Satlength=251 Nr  
of Repeats=11 RepeatLength=21 seed=CGCCAGTAAA Num.seqs=9  
Similarity=0.611111 10  
TTTACTGGCGGATANCGCC-AC-  
GCF\_001591665.1\_ASM159166v1\_genomic.fna\_18:66724-66974 Satlength=251 Nr  
of Repeats=12 RepeatLength=21 seed=TTTACTGGCG Num.seqs=11  
Similarity=0.881097 0  
TTTACTGGCGGATA-CNCC-TCT

\*\*\*\*\* \* \* \* \*

Consensus:

TTTACTGGCGGAtAnCnCCaC

>Bacillus\_Fam\_330\_21\_3 Nr. of seq. 3 Alignment length(with gaps) = 23  
Alignment score = 0.642512  
GCF\_000508325.1\_BAVI\_1\_genomic.fna\_48:16287-16371 Satlength=85 Nr of  
Repeats=4 RepeatLength=21 seed=TGGCTATTTT Num.seqs=4 Similarity=0.640212  
8 GAGGGTTATGGCTATTTT--CT  
Rev.of\_GCF\_001591805.1\_ASM159180v1\_genomic.fna\_27:88721-88805  
Satlength=85 Nr of Repeats=4 RepeatLength=21 seed=TAGACAAAAC Num.seqs=4

Similarity=0.600242 14  
GAGNGTTTTGTCTATTTTT--AT  
Rev.of\_GCF\_001591805.1\_ASM159180v1\_genomic.fna\_15:54241-54325  
Satlength=85 Nr of Repeats=4 RepeatLength=21 seed=TAGCCATAAC Num.seqs=4  
Similarity=0.612269 10  
GTTATGGCTATTTTT-TNATGGA

\* \* \* \* \*  
Consensus:

gttnTgtcTaTtTttntGagn

>Bacillus\_Fam\_331\_21\_3 Nr. of seq. 3 Alignment length(with gaps) = 23  
Alignment score = 0.671498  
GCF\_001591425.1\_ASM159142v1\_genomic.fna\_97:20-272 Satlength=253 Nr of  
Repeats=8 RepeatLength=21 seed=TTGGCACAA Num.seqs=5 Similarity=0.822222  
19 TGGCACAAAAGCGA-ATC-CGGT  
Rev.of\_GCF\_001591425.1\_ASM159142v1\_genomic.fna\_138:7019-7720  
Satlength=702 Nr of Repeats=7 RepeatLength=21 seed=CTTTTGCGCC Num.seqs=6  
Similarity=0.801010 32  
TGGCGCAAAAG-GT-ATCTCGGT  
GCF\_001591425.1\_ASM159142v1\_genomic.fna\_193:37-142 Satlength=106 Nr of  
Repeats=4 RepeatLength=21 seed=ATCTCGGTTG Num.seqs=3 Similarity=0.808081  
35 TGGCGCAAAA--GTAATCTCGGT

\*\*\*\*\* \* \*\*\* \*\*  
Consensus:

GTTGGCgCAAAAgGtATCtCG

>Bacillus\_Fam\_332\_21\_3 Nr. of seq. 3 Alignment length(with gaps) = 23  
Alignment score = 0.690821  
GCF\_001591665.1\_ASM159166v1\_genomic.fna\_27:91341-91425 Satlength=85 Nr of  
Repeats=4 RepeatLength=21 seed=TTCGCAAATA Num.seqs=4 Similarity=0.661376  
12 AAAACC-CTGA-TATTCGCAAAT  
Rev.of\_GCF\_001591805.1\_ASM159180v1\_genomic.fna\_3:0-84 Satlength=85 Nr of  
Repeats=4 RepeatLength=21 seed=TTGCGAATCT Num.seqs=4 Similarity=0.968254  
19 AAAACC-ATCA-GATTCGCAAAT  
Rev.of\_GCF\_001591665.1\_ASM159166v1\_genomic.fna\_46:16384-16468  
Satlength=85 Nr of Repeats=4 RepeatLength=21 seed=TTTATTGCG Num.seqs=4  
Similarity=0.607639 24  
AAANCCTGTCATTATTCGCAAAT

\*\*\*\*\* \*\* \* \* \*  
Consensus:

TTCGCAAATAAAaCCnTcAtA

>Bacillus\_Fam\_333\_21\_3 Nr. of seq. 3 Alignment length(with gaps) = 23  
Alignment score = 0.637681  
GCF\_001648575.1\_ASM164857v1\_genomic.fna\_59:127044-127915 Satlength=872 Nr  
of Repeats=19 RepeatLength=21 seed=TGACGGGATT Num.seqs=12  
Similarity=0.566755 0  
TGACGGGATTNTCT-TGNGTTG-

Rev.of\_GCF\_001648575.1\_ASM164857v1\_genomic.fna\_61:125456-126083  
Satlength=628 Nr of Repeats=10 RepeatLength=21 seed=AATCCCGTCA  
Num.seqs=6 Similarity=0.385470  
10 TGACGGGATTATCA-CGTGTTAN  
GCF\_001648575.1\_ASM164857v1\_genomic.fna\_3:22935-23103 Satlength=169 Nr of  
Repeats=5 RepeatLength=21 seed=TGACGGGATT Num.seqs=4 Similarity=0.391865  
0 TGACGGGATTTTCTCCGANTTA-

\*\*\*\*\* \*\* \* \*\*

Consensus:

TGACGGGATTnTctcGngTTa

>Bacillus\_Fam\_334\_23\_3 Nr. of seq. 3 Alignment length(with gaps) = 23  
Alignment score = 0.647343  
GCF\_001484965.1\_ASM148496v1\_genomic.fna\_5:31017-31101 Satlength=85 Nr of  
Repeats=4 RepeatLength=21 seed=TCATACCGAC Num.seqs=4 Similarity=0.737374  
0 TC-ATACCGACAAGAGCGAGCGT  
GCF\_001484965.1\_ASM148496v1\_genomic.fna\_5:26815-26983 Satlength=169 Nr of  
Repeats=8 RepeatLength=21 seed=CGGACAAGAG Num.seqs=8 Similarity=0.714286  
6 TCNATACGGACAAGAGCGAGAGC  
Rev.of\_GCF\_001484965.1\_ASM148496v1\_genomic.fna\_11:871-997 Satlength=127  
Nr of Repeats=6 RepeatLength=21 seed=TGTCCGATTG Num.seqs=6  
Similarity=0.755556 11  
TCAAT-CGGACAGGAGGNAGCGC

\*\* \*\* \* \*\*\*\*\* \*\* \*

Consensus:

TCnATaCgGACAaGAGcgAGcGc

>Bacillus\_Fam\_335\_23\_3 Nr. of seq. 3 Alignment length(with gaps) = 23  
Alignment score = 0.743961  
GCF\_000612665.1\_FF4\_genomic.fna\_55:18802-18886 Satlength=85 Nr of  
Repeats=4 RepeatLength=21 seed=TATTTGCGAA Num.seqs=4 Similarity=0.552083  
0 TATTTGCGAATTTCTTGCTNTT  
Rev.of\_GCF\_001591805.1\_ASM159180v1\_genomic.fna\_24:33836-33920  
Satlength=85 Nr of Repeats=4 RepeatLength=21 seed=ATTCGCAAAT Num.seqs=4  
Similarity=0.570602 11  
TATTTGCGAATTACCTGGCNTTT  
Rev.of\_GCF\_001591665.1\_ASM159166v1\_genomic.fna\_15:12666-12750  
Satlength=85 Nr of Repeats=4 RepeatLength=21 seed=TTGCGAAATA Num.seqs=4  
Similarity=0.469017 10  
TATTTGCGAATTACNGNGNNTTT

\*\*\*\*\* \* \* \*\*

Consensus:

TATTTGCGAATTaCctnGcntTT

>Bacillus\_Fam\_336\_20\_3 Nr. of seq. 3 Alignment length(with gaps) = 22  
Alignment score = 0.676768  
GCF\_000008505.1\_ASM850v1\_genomic.fna\_1:4488701-4488841 Satlength=141 Nr  
of Repeats=7 RepeatLength=20 seed=TATATCGGCG Num.seqs=7

Similarity=0.662887  
0 TATATCGGCGA-TTC-TCCATT  
GCF\_000007845.1\_ASM784v1\_genomic.fna\_1:4493623-4493703 Satlength=81 Nr of  
Repeats=4 RepeatLength=20 seed=TATATCGGCG Num.seqs=4 Similarity=0.567460  
0 TATATCGGCGACATC-TCGATT  
GCF\_001636315.1\_ASM163631v1\_genomic.fna\_1:11705-11788 Satlength=84 Nr of  
Repeats=4 RepeatLength=21 seed=TTTATCGGCG Num.seqs=3 Similarity=0.504630  
19 T-TATCGGCGA-TTCNTCGANT

\* \* \* \* \*

Consensus:

TaTATCGGCGAtTCTCgAtT

>Bacillus\_Fam\_337\_20\_3 Nr. of seq. 3 Alignment length(with gaps) = 22  
Alignment score = 0.651515

GCF\_000285535.1\_ASM28553v1\_genomic.fna\_2:498937-499757 Satlength=821 Nr  
of Repeats=30 RepeatLength=20 seed=GACGCAAATA Num.seqs=19  
Similarity=0.625341

0

GACGCAAAAAACCTNGT--GGN

Rev.of\_GCF\_000285535.1\_ASM28553v1\_genomic.fna\_6:20567-21714  
Satlength=1148 Nr of Repeats=52 RepeatLength=20 seed=TTTTTGCGTC  
Num.seqs=41 Similarity=0.672416

10 GACGCAAAAAANCTCGGT--GGA

Rev.of\_GCF\_000285535.1\_ASM28553v1\_genomic.fna\_2:814688-815514  
Satlength=827 Nr of Repeats=13 RepeatLength=20 seed=TTTTTGCGTC  
Num.seqs=8 Similarity=0.607143

10 GACGCAAAAAANNTTGGTCAGGA

\* \* \* \* \*

Consensus:

GACGCAAAAAnccttgGTGGa

>Bacillus\_Fam\_338\_21\_3 Nr. of seq. 3 Alignment length(with gaps) = 22  
Alignment score = 0.732323

GCF\_000401235.1\_BacNeaAAU1\_genomic.fna\_89:3-145 Satlength=143 Nr of  
Repeats=7 RepeatLength=20 seed=ATCAGCCAAA Num.seqs=5 Similarity=0.880000

0 ATCAGCCAAAGCAGCTG-G-AT

GCF\_000401235.1\_BacNeaAAU1\_genomic.fna\_88:17091-17236 Satlength=146 Nr of  
Repeats=7 RepeatLength=21 seed=ATCAGCCAAA Num.seqs=5 Similarity=0.688889

0 ATCAGCCAAAGCAGNTGNG-AT

Rev.of\_GCF\_001591585.1\_ASM159158v1\_genomic.fna\_21:35910-36015  
Satlength=106 Nr of Repeats=5 RepeatLength=21 seed=TTTGGCTGAT Num.seqs=5  
Similarity=0.671212

10

ATCAGCCAAAGTAG-TGGGTAT

\* \* \* \* \*

Consensus:

ATCAGCCAAAGcAGnTGnGAT

>Bacillus\_Fam\_339\_21\_3 Nr. of seq. 3 Alignment length(with gaps) = 22  
Alignment score = 0.772727

GCF\_001591585.1\_ASM159158v1\_genomic.fna\_12:54775-55019 Satlength=245 Nr  
of Repeats=12 RepeatLength=20 seed=TTGGCTGAT Num.seqs=8  
Similarity=0.681159  
0 -TTGGCTGATTTCTCCTTCCG-  
GCF\_001591585.1\_ASM159158v1\_genomic.fna\_3:245600-245705 Satlength=106 Nr  
of Repeats=5 RepeatLength=21 seed=TTTGGCTGAT Num.seqs=5  
Similarity=0.629167  
0 TTTGGCTGATTTCTCC-TCCGC  
GCF\_001591585.1\_ASM159158v1\_genomic.fna\_25:28599-28911 Satlength=313 Nr  
of Repeats=15 RepeatLength=21 seed=TTGGCTGATA Num.seqs=13  
Similarity=0.736264  
TTTGGCTGATTTCCCC-TCCAC

1

\*\*\*\*\* \*\* \*\*

Consensus:

tTTGGCTGATTTCTCCTCCgc

>Bacillus\_Fam\_340\_21\_3 Nr. of seq. 3 Alignment length(with gaps) = 22  
Alignment score = 0.616162  
GCF\_001877785.1\_PlanoSAMM\_genomic.fna\_106:177497-177577 Satlength=81 Nr  
of Repeats=4 RepeatLength=20 seed=AATGGATCAT Num.seqs=4  
Similarity=0.755556  
0 AATGGATCATAAA-TCTCAA-  
GCF\_001315085.1\_ASM131508v1\_genomic.fna\_1:3481-3565 Satlength=85 Nr of  
Repeats=4 RepeatLength=21 seed=GGATCATAAA Num.seqs=4 Similarity=0.458333  
3 GTTGGATCATAAA-TCCGCAAT  
GCF\_001315085.1\_ASM131508v1\_genomic.fna\_3:99320-99404 Satlength=85 Nr of  
Repeats=4 RepeatLength=21 seed=GGATCATAAA Num.seqs=4 Similarity=0.518519  
3 TCTGGATCATAAATTATCNAAT

\*\*\*\*\* \* \*\*

Consensus:

nnTGGATCATAAATctccAAt

>Bacillus\_Fam\_341\_21\_3 Nr. of seq. 3 Alignment length(with gaps) = 22  
Alignment score = 0.727273  
GCF\_000025805.1\_ASM2580v1\_genomic.fna\_1:339971-340130 Satlength=160 Nr of  
Repeats=5 RepeatLength=21 seed=ACTCCTATAA Num.seqs=3 Similarity=0.703704  
0 ACTCCTATAATAAAAANNA-TA  
Rev.of\_GCF\_000225265.1\_ASM22526v1\_genomic.fna\_1:4636885-4637044  
Satlength=160 Nr of Repeats=6 RepeatLength=21 seed=TTATTATAGG Num.seqs=4  
Similarity=0.592172 13  
ACTCCTATAATAAAGACGG-TA  
Rev.of\_GCF\_001591565.1\_ASM159156v1\_genomic.fna\_136:5321-5468  
Satlength=148 Nr of Repeats=4 RepeatLength=21 seed=TTTATTATAG Num.seqs=3  
Similarity=0.585859 13  
-CTCCTATAATAAAATGANTA

\*\*\*\*\* \* \*\*

Consensus:

aCTCCTATAATAAAaAngaTA



>Bacillus\_Fam\_342\_22\_3 Nr. of seq. 3 Alignment length(with gaps) = 22  
 Alignment score = 0.636364  
 GCF\_000307875.1\_BABA1.0\_genomic.fna\_55:48119-48266 Satlength=148 Nr of  
 Repeats=7 RepeatLength=21 seed=TTTGGCGGAA Num.seqs=7 Similarity=0.547619  
 0 TTTGGCGGAATTACCANTCNA-  
 Rev.of\_GCF\_001591665.1\_ASM159166v1\_genomic.fna\_36:99463-99691  
 Satlength=229 Nr of Repeats=10 RepeatLength=21 seed=ATTCCGCCAA  
 Num.seqs=9 Similarity=0.427298  
 11 TTTGGCGGAATT-CCAANNAAG  
 Rev.of\_GCF\_001591445.1\_ASM159144v1\_genomic.fna\_22:36726-36903  
 Satlength=178 Nr of Repeats=6 RepeatLength=21 seed=ATTCCGCCAA Num.seqs=5  
 Similarity=0.479710 11  
 TTTGGCGGAATNNCTNNTNAAG

\*\*\*\*\* \* \*  
 Consensus:

TTTGGCGGAATtnCcantnaAg

>Bacillus\_Fam\_343\_21\_3 Nr. of seq. 3 Alignment length(with gaps) = 22  
 Alignment score = 0.737374  
 GCF\_000752035.1\_Bacillus\_rubiinfantis\_genomic.fna\_11:292889-293098  
 Satlength=210 Nr of Repeats=9 RepeatLength=21 seed=ATACGGGAGT Num.seqs=8  
 Similarity=0.638975 0  
 ATACGAGAGTAATC-CACTCCT  
 GCF\_000752035.1\_Bacillus\_rubiinfantis\_genomic.fna\_16:9832-10553  
 Satlength=722 Nr of Repeats=28 RepeatLength=21 seed=TTTACGAGAG  
 Num.seqs=21 Similarity=0.773243  
 19 -TACGAGAGTAANCGCACTCTT  
 GCF\_000752035.1\_Bacillus\_rubiinfantis\_genomic.fna\_33:58692-58944  
 Satlength=253 Nr of Repeats=12 RepeatLength=21 seed=TTACGGGAGT  
 Num.seqs=12 Similarity=0.844156  
 20 -TACGGGAGTAACCGCACTCGT

\*\*\*\* \* \* \* \* \*  
 Consensus:

TACGaGAGTAAnCgCACTCnT

>Bacillus\_Fam\_344\_21\_3 Nr. of seq. 3 Alignment length(with gaps) = 22  
 Alignment score = 0.747475  
 GCF\_001484965.1\_ASM148496v1\_genomic.fna\_1:76098-76366 Satlength=269 Nr of  
 Repeats=13 RepeatLength=21 seed=CTTGAGCGGT Num.seqs=9  
 Similarity=0.771886  
 0 CTTGAGCGGTATCTCCCTCN-  
 Rev.of\_GCF\_001484965.1\_ASM148496v1\_genomic.fna\_32:15969-16073  
 Satlength=105 Nr of Repeats=5 RepeatLength=21 seed=TACCGCTCAA Num.seqs=4  
 Similarity=0.773990 11  
 CTTGAGCGGTAT-TCTCCTCCG  
 GCF\_001484965.1\_ASM148496v1\_genomic.fna\_37:19197-19446 Satlength=250 Nr  
 of Repeats=12 RepeatLength=21 seed=CTTGAGCGGT Num.seqs=9  
 Similarity=0.700176  
 21 CTTGAGCGGTAT-TCNGCTCCT

\*\*\*\*\* \*\* \*\*\*

Consensus:

CTTGAGCGGTATTcncCTCcn

>Bacillus\_Fam\_345\_21\_3 Nr. of seq. 3 Alignment length(with gaps) = 22  
Alignment score = 0.727273

GCF\_001578185.1\_ASM157818v1\_genomic.fna\_1:3660606-3660924 Satlength=319  
Nr of Repeats=13 RepeatLength=21 seed=ATGAACTGCT Num.seqs=8  
Similarity=0.952381 0

ATGAACTGCTGCT-TTCGTCTG

GCF\_002019665.1\_ASM201966v1\_genomic.fna\_1:3758998-3759208 Satlength=211  
Nr of Repeats=10 RepeatLength=21 seed=CTATTCGTCG Num.seqs=10  
Similarity=0.957672 10

-TTAACCACTGCTATTTCGTCCG

GCF\_002019665.1\_ASM201966v1\_genomic.fna\_1:3759021-3759394 Satlength=374  
Nr of Repeats=18 RepeatLength=21 seed=ATTCGTCCGGT Num.seqs=13  
Similarity=0.766900 12

-TTAACCACTGCTATTTCGTCCG

\* \*\*\* \*\*\*\*\* \*

Consensus:

TtAACCaCTGCTaTTCGTcGg

>Bacillus\_Fam\_346\_21\_3 Nr. of seq. 3 Alignment length(with gaps) = 22  
Alignment score = 0.631313

GCF\_900156865.1\_PRJEB18960\_genomic.fna\_3:2989497-2989758 Satlength=262 Nr  
of Repeats=8 RepeatLength=21 seed=TGTCCCATAT Num.seqs=5  
Similarity=0.533333 0

TGTCCCATATAATNGAAGTTN-

Rev.of\_GCF\_900156865.1\_PRJEB18960\_genomic.fna\_3:3020484-3021148

Satlength=665 Nr of Repeats=13 RepeatLength=21 seed=TTTATGGGAC

Num.seqs=10 Similarity=0.606280

11 TGTCCCATAAANTCCAAGTAN-

Rev.of\_GCF\_900156865.1\_PRJEB18960\_genomic.fna\_3:3235322-3235665

Satlength=344 Nr of Repeats=9 RepeatLength=21 seed=TTTATGGGAC Num.seqs=7

Similarity=0.541667 11

TGTCCCATATAATCGAATTNTN

\*\*\*\*\* \* \* \*\* \*

Consensus:

TGTCCCATAnAaTcgAAgTnn

>Bacillus\_Fam\_347\_18\_3 Nr. of seq. 3 Alignment length(with gaps) = 21  
Alignment score = 0.767196

GCF\_000430785.1\_ASM43078v1\_genomic.fna\_5:28845-28989 Satlength=145 Nr of  
Repeats=8 RepeatLength=18 seed=CCAGGAGCAG Num.seqs=8 Similarity=0.941799  
0 CCAGGAGCAGGCTTTGGC---

GCF\_000430785.1\_ASM43078v1\_genomic.fna\_5:28846-29137 Satlength=292 Nr of  
Repeats=9 RepeatLength=18 seed=CAGGAGCAGG Num.seqs=8 Similarity=0.941799

1 CCAGGAGCAGGCTTTGGC---

GCF\_001636345.1\_ASM163634v1\_genomic.fna\_1:1975200-1975335 Satlength=136  
Nr of Repeats=5 RepeatLength=21 seed=CAGGACCAGG Num.seqs=4  
Similarity=0.788360 1  
CCAGGACCAGGNTTTGGCACT

\*\*\*\*\* \*\*\*\*\*

Consensus:

CCAGGAgCAGGcTTTGGC

>Bacillus\_Fam\_348\_20\_3 Nr. of seq. 3 Alignment length(with gaps) = 21  
Alignment score = 0.708995  
GCF\_001273755.1\_ASM127375v1\_genomic.fna\_17:4571297-4571397 Satlength=101  
Nr of Repeats=4 RepeatLength=20 seed=GTAGGACGAA Num.seqs=3  
Similarity=0.717172 0  
GTAGGACGAATTATTC-GCGT  
Rev.of\_GCF\_001578185.1\_ASM157818v1\_genomic.fna\_1:4465368-4465568  
Satlength=201 Nr of Repeats=6 RepeatLength=20 seed=GCAAATATTT Num.seqs=4  
Similarity=0.866667 18  
GTAGGTCGAAATATTT-GCGT  
GCF\_001578185.1\_ASM157818v1\_genomic.fna\_1:3658103-3658186 Satlength=84 Nr  
of Repeats=4 RepeatLength=21 seed=AGGACGAATT Num.seqs=3  
Similarity=0.788360 2  
GAAGGACGAATTATTTGGTGT

\* \*\*\* \*\*\*\*\* \* \*\*

Consensus:

GtAGGaCGAAtTATTTGcGT

>Bacillus\_Fam\_349\_20\_3 Nr. of seq. 3 Alignment length(with gaps) = 21  
Alignment score = 0.687831  
GCF\_001439915.1\_ASM143991v1\_genomic.fna\_84:184831-184911 Satlength=81 Nr  
of Repeats=4 RepeatLength=20 seed=ACTGTCACTA Num.seqs=4  
Similarity=0.646825  
0 ACTGTCACT-ATCCGCAAAAT  
GCF\_001439915.1\_ASM143991v1\_genomic.fna\_124:109637-109717 Satlength=81 Nr  
of Repeats=4 RepeatLength=20 seed=TACTGTCACT Num.seqs=4  
Similarity=0.678571 19  
ACTGTCACT-ATTCCNAAAAT  
Rev.of\_GCF\_900156865.1\_PRJEB18960\_genomic.fna\_3:2916495-2916575  
Satlength=81 Nr of Repeats=4 RepeatLength=20 seed=AGTGGCAGTA Num.seqs=4  
Similarity=0.629630 9  
ACTGCCACTAATNTCTAAAAT

\*\*\*\* \*\*\*\*\*

Consensus:

ACTGtCACTATnccnAAAAT

>Bacillus\_Fam\_350\_21\_3 Nr. of seq. 3 Alignment length(with gaps) = 21  
Alignment score = 0.687831

GCF\_001591425.1\_ASM159142v1\_genomic.fna\_4:87634-87736 Satlength=103 Nr of Repeats=5 RepeatLength=20 seed=TTTATTTGCG Num.seqs=3 Similarity=0.688889  
0 TTTATTTGCGATAA-TACGCC  
GCF\_001591425.1\_ASM159142v1\_genomic.fna\_176:0-79 Satlength=80 Nr of Repeats=4 RepeatLength=20 seed=TTTATTTGCG Num.seqs=4 Similarity=1.000000  
0 TTTATTTGCGATAACTACGT-  
Rev.of\_GCF\_001591425.1\_ASM159142v1\_genomic.fna\_108:14449-14552  
Satlength=104 Nr of Repeats=5 RepeatLength=21 seed=CGCAAATAAG Num.seqs=3  
Similarity=0.915344 10  
CTTATTTGCGATACCTTCATC

\*\*\*\*\* \* \*

Consensus:

tTTATTTGCGATAAcTaCgtc

>Bacillus\_Fam\_351\_21\_3 Nr. of seq. 3 Alignment length(with gaps) = 21  
Alignment score = 0.957672  
GCF\_000008505.1\_ASM850v1\_genomic.fna\_1:3003849-3004059 Satlength=211 Nr of Repeats=10 RepeatLength=21 seed=GCCAACCACC Num.seqs=10  
Similarity=0.887125 0  
GCCAACCACCGTGTCCGCCTT  
GCF\_000290995.1\_Baci\_cere\_AND1407\_G13175\_V1\_genomic.fna\_1:1982219-1982366  
Satlength=148 Nr of Repeats=7 RepeatLength=21 seed=GCCAACCACC Num.seqs=7  
Similarity=0.873016 0  
GCCAACCACCGTGTCCGCCTT  
Rev.of\_GCF\_001645555.1\_ASM164555v1\_genomic.fna\_51:17837-18077  
Satlength=241 Nr of Repeats=11 RepeatLength=21 seed=GGTGGTTGGC  
Num.seqs=10 Similarity=0.815168  
10 GCCAACCACCGTGTCCACCTT

\*\*\*\*\* \*\*\*\*

Consensus:

GCCAACCACCGTGTCCgCCTT

>Bacillus\_Fam\_352\_21\_3 Nr. of seq. 3 Alignment length(with gaps) = 21  
Alignment score = 0.788360  
GCF\_000025825.1\_ASM2582v1\_genomic.fna\_1:1391429-1391846 Satlength=418 Nr of Repeats=24 RepeatLength=21 seed=AGAACGGCGA Num.seqs=15  
Similarity=0.824641 0  
AGAACGGCGAGTACCGCGGGT  
Rev.of\_GCF\_000225265.1\_ASM22526v1\_genomic.fna\_1:3576340-3576466  
Satlength=127 Nr of Repeats=5 RepeatLength=21 seed=CGTTCTACTC Num.seqs=4  
Similarity=0.894180 6  
AGAACGACGAGACGGCGAGT  
GCF\_000956595.1\_ASM95659v1\_genomic.fna\_23:54484-54736 Satlength=253 Nr of Repeats=11 RepeatLength=21 seed=GAGAGCGGCG Num.seqs=10  
Similarity=0.952028  
8 AGAACGGCGAGAGCGGCGAGT

\*\*\*\*\* \*\*\*\* \* \*\*\* \*\*

Consensus:

AGAACGgCGAGagCgGCGaGT

>Bacillus\_Fam\_353\_21\_3 Nr. of seq. 3 Alignment length(with gaps) = 21  
Alignment score = 0.661376  
GCF\_000813125.1\_ASM81312v1\_genomic.fna\_62:25438-25563 Satlength=126 Nr of  
Repeats=5 RepeatLength=21 seed=ATTCCGCGAA Num.seqs=4 Similarity=0.513228  
0 ATTCCGCGAAAACCGAGCGGA  
Rev.of\_GCF\_000813125.1\_ASM81312v1\_genomic.fna\_86:16754-16838 Satlength=85  
Nr of Repeats=4 RepeatLength=21 seed=TTTCGCGGAAT Num.seqs=4  
Similarity=0.452899 10  
ATTCCGCGAAATCTGAGNTTA  
Rev.of\_GCF\_900104555.1\_IMG-  
taxon\_2651870172\_annotated\_assembly\_genomic.fna\_19:24896-25042  
Satlength=147 Nr of Repeats=6 RepeatLength=21 seed=TTTCGCGGGA Num.seqs=5  
Similarity=0.576389 11 ATCCCGCGAAANNAGAGTNGA

\*\* \*\*\*\*\* \*\*\* \*  
Consensus:

ATtCCGCGAAAncnGAGnngA

>Bacillus\_Fam\_354\_21\_3 Nr. of seq. 3 Alignment length(with gaps) = 21  
Alignment score = 0.756614  
GCF\_000948175.1\_BFA\_2\_A\_genomic.fna\_17:13637-13721 Satlength=85 Nr of  
Repeats=4 RepeatLength=21 seed=AACCGAGAGAGA Num.seqs=4 Similarity=0.591435  
0 AACCGAGAGAATAAGGTCNGA  
Rev.of\_GCF\_000948175.1\_BFA\_2\_A\_genomic.fna\_166:2351-2477 Satlength=127 Nr  
of Repeats=6 RepeatLength=21 seed=TCTCTCGGTT Num.seqs=6  
Similarity=0.708081 10  
AACCGAGAGATTAAGTGCTGA  
Rev.of\_GCF\_000948175.1\_BFA\_2\_A\_genomic.fna\_190:1516-1684 Satlength=169 Nr  
of Repeats=8 RepeatLength=21 seed=TCTCTCGGTT Num.seqs=8  
Similarity=0.793651 10  
AACCGAGAGATTAATGGCTGG

\*\*\*\*\* \*\*\* \* \*  
Consensus:

AACCGAGAGAtTAaggGcTga

>Bacillus\_Fam\_355\_21\_3 Nr. of seq. 3 Alignment length(with gaps) = 21  
Alignment score = 0.788360  
GCF\_001484965.1\_ASM148496v1\_genomic.fna\_6:66041-66125 Satlength=85 Nr of  
Repeats=4 RepeatLength=21 seed=GATGTGAGAG Num.seqs=4 Similarity=0.765152  
0 GATGTGAGAGAGAAGAGCGCG  
Rev.of\_GCF\_001484965.1\_ASM148496v1\_genomic.fna\_16:33130-33410  
Satlength=281 Nr of Repeats=10 RepeatLength=21 seed=TCTCTCGCAT  
Num.seqs=6 Similarity=0.847619  
11 GATGCGAGAGAGAAGAGCTCG  
GCF\_001484965.1\_ASM148496v1\_genomic.fna\_26:28029-28279 Satlength=251 Nr  
of Repeats=10 RepeatLength=21 seed=GGATGTGAGC Num.seqs=7  
Similarity=0.848828  
20 GATGTGAGCAAGAAGGGCGCG

\*\*\*\* \*\*\* \*\*\*\*\* \*\* \*\*

Consensus:

GATGtGAGagAGAAGaGCgCG

>Bacillus\_Fam\_356\_21\_3 Nr. of seq. 3 Alignment length(with gaps) = 21

Alignment score = 0.671958

GCF\_001591445.1\_ASM159144v1\_genomic.fna\_22:68731-68836 Satlength=106 Nr of Repeats=5 RepeatLength=21 seed=ATTCCGCCAA Num.seqs=5

Similarity=0.476812

0 ATTCCGCCAANTTCGNNNTGN

GCF\_001591445.1\_ASM159144v1\_genomic.fna\_33:29-282 Satlength=254 Nr of

Repeats=9 RepeatLength=21 seed=ATTCCGCCAA Num.seqs=8 Similarity=0.493271

0 ATTCCGCCAACTTNGGANNNGN

Rev.of\_GCF\_001591445.1\_ASM159144v1\_genomic.fna\_32:27469-27574

Satlength=106 Nr of Repeats=5 RepeatLength=21 seed=TTGGCGGAAT Num.seqs=5

Similarity=0.454167

10

ATTCCGCCAACTNTGGAAGNN

\*\*\*\*\* \* \*\* \*

Consensus:

ATTCCGCCAAcTtnGGanngN

>Bacillus\_Fam\_357\_20\_3 Nr. of seq. 3 Alignment length(with gaps) = 20

Alignment score = 0.711111

GCF\_001439915.1\_ASM143991v1\_genomic.fna\_105:322815-322955 Satlength=141

Nr of Repeats=7 RepeatLength=20 seed=GACGCAAATA Num.seqs=7

Similarity=0.525132

0

GACGCAAATATCGTGAAN--

GCF\_001439915.1\_ASM143991v1\_genomic.fna\_83:505700-505820 Satlength=121 Nr of

Repeats=6 RepeatLength=20 seed=ACGCAAATAT Num.seqs=6

Similarity=0.600529

1

GACGCAAATATTGTGAAACT

GCF\_001877785.1\_PlanoSAMM\_genomic.fna\_117:26443-26710 Satlength=268 Nr of

Repeats=5 RepeatLength=20 seed=GGCGCAATTA Num.seqs=3 Similarity=0.600000

20 GGCGCAATTATTATGAAACT

\* \*\*\*\*\* \*\*\* \*\*\*\*\*

Consensus:

GaCGCAAaTATtgTGAAact

>Bacillus\_Fam\_358\_20\_3 Nr. of seq. 3 Alignment length(with gaps) = 20

Alignment score = 0.877778

GCF\_000374565.1\_ASM37456v1\_genomic.fna\_5:154921-155692 Satlength=772 Nr of

Repeats=32 RepeatLength=20 seed=CTCGTATAAA Num.seqs=21

Similarity=0.707937

0

CTCGTATAAAAGCTNCAACT

Rev.of\_GCF\_000374565.1\_ASM37456v1\_genomic.fna\_7:0-79 Satlength=80 Nr of

Repeats=4 RepeatLength=20 seed=TATGTGAGTT Num.seqs=4 Similarity=1.000000

6 CACATATAAAAGCTCCAAC

GCF\_000374565.1\_ASM37456v1\_genomic.fna\_33:0-79 Satlength=80 Nr of  
Repeats=4 RepeatLength=20 seed=TAAAAGCTCC Num.seqs=4 Similarity=1.000000  
6 CACATATAAAAAGCTCCAAC

\* \* \*\*\*\*\* \*

Consensus:

CaCaTATAAAAAGCTcCAACT

>Bacillus\_Fam\_359\_20\_3 Nr. of seq. 3 Alignment length(with gaps) = 20  
Alignment score = 0.788889  
GCF\_000612665.1\_FF4\_genomic.fna\_33:10627-10708 Satlength=82 Nr of  
Repeats=4 RepeatLength=20 seed=TATCGGGAAA Num.seqs=3 Similarity=0.629630  
0 TATCGGGAAAANATTNAATA  
Rev.of\_GCF\_000759675.1\_ASM75967v1\_genomic.fna\_151:505712-505793  
Satlength=82 Nr of Repeats=4 RepeatLength=20 seed=TCCTGATAT Num.seqs=3  
Similarity=0.644444 9  
TATCAGGAAAAATTTCAATA  
Rev.of\_GCF\_000759675.1\_ASM75967v1\_genomic.fna\_153:106295-106375  
Satlength=81 Nr of Repeats=4 RepeatLength=20 seed=CTGATATATT Num.seqs=4  
Similarity=0.731481 26  
TATCAGGAAAAATNAAATA

\*\*\*\* \*\*\*\*\* \*

Consensus:

TATCaGGAAAAaaTtnAATA

>Bacillus\_Fam\_360\_18\_3 Nr. of seq. 3 Alignment length(with gaps) = 18  
Alignment score = 0.703704  
GCF\_000175075.1\_ASM17507v1\_genomic.fna\_6:61019-61091 Satlength=73 Nr of  
Repeats=4 RepeatLength=18 seed=GGCGGTCTCTG Num.seqs=4 Similarity=0.962963  
0 GGCGGTCTCTGGCTTCGGT  
GCF\_002019665.1\_ASM201966v1\_genomic.fna\_1:3587353-3587695 Satlength=343  
Nr of Repeats=19 RepeatLength=18 seed=GGTGGACCAG Num.seqs=19  
Similarity=0.984405 0  
GGTGGACCAGGTTCGGT  
GCF\_001648575.1\_ASM164857v1\_genomic.fna\_62:119312-119492 Satlength=181 Nr  
of Repeats=10 RepeatLength=18 seed=TTCTGGTGGTG Num.seqs=10  
Similarity=0.795885 12  
GGTGCACCGGGATTTCGGT

\*\* \* \*\* \*\* \*\*\*\*\*

Consensus:

GGtGgaCCnGGnTTCGGT

>Bacillus\_Fam\_361\_18\_3 Nr. of seq. 3 Alignment length(with gaps) = 18  
Alignment score = 0.746914  
GCF\_001439635.1\_ASM143963v1\_genomic.fna\_162:551140-551212 Satlength=73 Nr  
of Repeats=4 RepeatLength=18 seed=TCAGCAGTAG Num.seqs=4  
Similarity=0.802469 0  
TCAGCAGTAGAATCAGAA

Rev.of\_GCF\_001439635.1\_ASM143963v1\_genomic.fna\_174:69602-72152  
Satlength=2551 Nr of Repeats=124 RepeatLength=18 seed=CTACTGCTGA  
Num.seqs=113 Similarity=0.785902  
10 TCAGCAGTAGAGTCNGCG  
Rev.of\_GCF\_001439635.1\_ASM143963v1\_genomic.fna\_174:69602-72528  
Satlength=2927 Nr of Repeats=142 RepeatLength=18 seed=CTACTGCTGA  
Num.seqs=129 Similarity=0.788123  
10 TCAGCAGTAGCGTCNGCG

\*\*\*\*\* \*\* \*

Consensus:

TCAGCAGTAGagTCnGcg

>Bacillus\_Fam\_362\_18\_3 Nr. of seq. 3 Alignment length(with gaps) = 18  
Alignment score = 0.679012  
GCF\_002019595.1\_ASM201959v1\_genomic.fna\_1:3913094-3913256 Satlength=163  
Nr of Repeats=9 RepeatLength=18 seed=TGCTCATGAT Num.seqs=9  
Similarity=0.759259 0  
TGCTCATGATGGTGGTCA  
GCF\_002019635.1\_ASM201963v1\_genomic.fna\_2:1628719-1628809 Satlength=91 Nr  
of Repeats=5 RepeatLength=18 seed=TGCTCATGAT Num.seqs=5  
Similarity=0.866667 0  
TGCTCATGATGATGTTCA  
GCF\_002019645.1\_ASM201964v1\_genomic.fna\_1:4893349-4893781 Satlength=433  
Nr of Repeats=24 RepeatLength=18 seed=ATGTGAATGA Num.seqs=24  
Similarity=0.927805 17  
TGTGAATGATCGTGATCA

\*\* \*\*\*\*\* \*\* \*\*\*

Consensus:

TGctcATGATggTGnTCA

>Bacillus\_Fam\_363\_16\_3 Nr. of seq. 3 Alignment length(with gaps) = 16  
Alignment score = 0.722222  
GCF\_000177235.2\_ASM17723v2\_genomic.fna\_1:1028903-1029101 Satlength=199 Nr  
of Repeats=5 RepeatLength=16 seed=AACCCGGGTT Num.seqs=3  
Similarity=0.888889 0  
AACCCGGGTTAAAGCG  
GCF\_000177235.2\_ASM17723v2\_genomic.fna\_1:1630177-1630375 Satlength=199 Nr  
of Repeats=5 RepeatLength=16 seed=GAACCCGGGT Num.seqs=3  
Similarity=0.944444 15  
AACCCGGGTTAGTGGG  
Rev.of\_GCF\_000177235.2\_ASM17723v2\_genomic.fna\_1:3834979-3835177  
Satlength=199 Nr of Repeats=5 RepeatLength=16 seed=GAACCCGGGT Num.seqs=3  
Similarity=0.888889 11  
AACCCGGGTTCAAGGT

\*\*\*\*\* \*

Consensus:

AACCCGGGTTaaaGgg



>Bacillus\_Fam\_364\_15\_3 Nr. of seq. 3 Alignment length(with gaps) = 15  
Alignment score = 0.762963  
GCF\_000307875.1\_BABA1.0\_genomic.fna\_140:27298-27463 Satlength=166 Nr of  
Repeats=11 RepeatLength=15 seed=GTATTTCTTC Num.seqs=11  
Similarity=0.844849  
0 GTATTTCTTCTTGAG  
GCF\_000706725.1\_ASM70672v1\_genomic.fna\_1:3260718-3261542 Satlength=825 Nr  
of Repeats=4 RepeatLength=15 seed=CTTCTTTTGG Num.seqs=3  
Similarity=1.000000 6  
GTTTTTCTTCTTTG  
GCF\_001591465.1\_ASM159146v1\_genomic.fna\_27:2859-2976 Satlength=118 Nr of  
Repeats=7 RepeatLength=15 seed=GGTTTTTCTT Num.seqs=6 Similarity=0.774815  
14 GTTTTTCTTCCTTAG

\*\* \*\*\*\*\* \* \*

Consensus:

GTtTTTCTTCTtTaG

>Bacillus\_Fam\_365\_15\_3 Nr. of seq. 3 Alignment length(with gaps) = 15  
Alignment score = 0.837037  
GCF\_000504145.1\_SOAPdenovo\_for\_version2.04\_of\_Bacillus\_sp.\_FJAT-  
14515\_genome\_genomic.fna\_28:32586-32916 Satlength=331 Nr of Repeats=22  
RepeatLength=15 seed=TCTGTTTTTT Num.seqs=22 Similarity=0.810651 0  
TCTGTTTTTTCTACN  
GCF\_000831065.1\_ASM83106v1\_genomic.fna\_1:4247809-4248064 Satlength=256 Nr  
of Repeats=17 RepeatLength=15 seed=TCTGGTTTTTT Num.seqs=17  
Similarity=0.926797 0  
TCTGGTTTTTTCTACT  
Rev.of\_GCF\_000832605.1\_ASM83260v1\_genomic.fna\_1:1426778-1426853  
Satlength=76 Nr of Repeats=5 RepeatLength=15 seed=CCAGAAGTAG Num.seqs=5  
Similarity=0.893333 5  
TCTGGTTTCTCTACT

\*\*\*\* \*\*\* \*\*\*\*\*

Consensus:

TCTGgTTTtTCTACT

>Bacillus\_Fam\_366\_15\_3 Nr. of seq. 3 Alignment length(with gaps) = 15  
Alignment score = 0.755556  
GCF\_000706725.1\_ASM70672v1\_genomic.fna\_1:1313522-1313585 Satlength=64 Nr  
of Repeats=4 RepeatLength=15 seed=TCTTCATCAG Num.seqs=3  
Similarity=0.881481  
0 TCTTCATCAGTTGTG  
Rev.of\_GCF\_001315165.1\_ASM131516v1\_genomic.fna\_16:18981-19722  
Satlength=742 Nr of Repeats=28 RepeatLength=15 seed=CTGAAGAAGA  
Num.seqs=23 Similarity=0.787879  
10 TCTTCTTCAGTNACG  
Rev.of\_GCF\_001315165.1\_ASM131516v1\_genomic.fna\_16:18981-20088  
Satlength=1108 Nr of Repeats=33 RepeatLength=15 seed=CTGAAGAAGA  
Num.seqs=23 Similarity=0.787879  
10 TCTTCTTCAGTNACG

\*\*\*\*\* \* \*

Consensus:

TCTTCTTCAGTnacG

>Bacillus\_Fam\_367\_12\_3 Nr. of seq. 3 Alignment length(with gaps) = 12

Alignment score = 0.675926

GCF\_000832605.1\_ASM83260v1\_genomic.fna\_1:4152867-4152911 Satlength=45 Nr

of Repeats=4 RepeatLength=11 seed=TCCTTTGTTA Num.seqs=4

Similarity=1.000000

0 TCCTTTGTAT-

Rev.of\_GCF\_000331575.1\_ASM33157v1\_genomic.fna\_1:1646263-1646335

Satlength=73 Nr of Repeats=6 RepeatLength=12 seed=TAAGAAAATA Num.seqs=6

Similarity=0.940741

6

TTCTTAGTTATT

GCF\_001274935.1\_ASM127493v1\_genomic.fna\_42:123528-124032 Satlength=505 Nr

of Repeats=4 RepeatLength=12 seed=TTTACTTTGT Num.seqs=3

Similarity=1.000000

10

TACTTTGTCATT

\* \*\*\* \*\* \*\*

Consensus:

TnCTTtGTtAtT

>Bacillus\_Fam\_368\_12\_3 Nr. of seq. 3 Alignment length(with gaps) = 12

Alignment score = 0.666667

GCF\_000007825.1\_ASM782v1\_genomic.fna\_1:4742290-4742338 Satlength=49 Nr of

Repeats=4 RepeatLength=12 seed=ATTGAAAAAG Num.seqs=4 Similarity=0.944444

0 ATTGAAAAAGGC

GCF\_000007845.1\_ASM784v1\_genomic.fna\_1:4598687-4598747 Satlength=61 Nr of

Repeats=5 RepeatLength=12 seed=AAGGTATAGA Num.seqs=5 Similarity=0.933333

7 ATAGAACAAGGT

Rev.of\_GCF\_000374345.1\_ASM37434v1\_genomic.fna\_7:48950-49010 Satlength=61

Nr of Repeats=4 RepeatLength=12 seed=CCTTCTTTTA Num.seqs=3

Similarity=0.650794

11

ATAAAAGAAGGT

\*\* \*\* \*

Consensus:

ATagAAnAAGGt

>Bacillus\_Fam\_369\_12\_3 Nr. of seq. 3 Alignment length(with gaps) = 12

Alignment score = 0.777778

GCF\_000196735.1\_ASM19673v1\_genomic.fna\_1:2209405-2209513 Satlength=109 Nr

of Repeats=9 RepeatLength=12 seed=GCTGCTGCAA Num.seqs=9

Similarity=0.944444

0

GCTGCTGCAACG

GCF\_000204275.1\_ASM20427v1\_genomic.fna\_1:2293892-2294000 Satlength=109 Nr

of Repeats=9 RepeatLength=12 seed=GCTGCTGCAA Num.seqs=9

Similarity=0.944444

0

GCTGCTGCAACG

GCF\_000321185.1\_ASM32118v1\_genomic.fna\_45:7876-8053 Satlength=178 Nr of Repeats=8 RepeatLength=12 seed=CTACTGCTGC Num.seqs=5 Similarity=0.911111  
7 GCTGCTACTACT

\*\*\*\*\* \* \*\*

Consensus:

GCTGCTgCaACg

>Bacillus\_Fam\_370\_12\_3 Nr. of seq. 3 Alignment length(with gaps) = 12  
Alignment score = 0.888889

GCF\_000401235.1\_BacNeaAAU1\_genomic.fna\_107:6849-6933 Satlength=85 Nr of Repeats=6 RepeatLength=12 seed=CCAGGAGAAG Num.seqs=5 Similarity=0.955556  
0 CCAGGAGAAGAA

Rev.of\_GCF\_001648575.1\_ASM164857v1\_genomic.fna\_60:146867-146939  
Satlength=73 Nr of Repeats=6 RepeatLength=12 seed=GGTTCTTCAC Num.seqs=6  
Similarity=0.881481 2

CCAGGTGAAGAA

Rev.of\_GCF\_002019665.1\_ASM201966v1\_genomic.fna\_1:4130554-4130638  
Satlength=85 Nr of Repeats=7 RepeatLength=12 seed=CCTGGTTCTT Num.seqs=7  
Similarity=0.873016 5

CCAGGCGAAGAA

\*\*\*\*\* \*\*\*\*\*

Consensus:

CCAGGnGAAGAA

>Bacillus\_Fam\_371\_12\_3 Nr. of seq. 3 Alignment length(with gaps) = 12  
Alignment score = 0.777778

GCF\_000615945.1\_ASM61594v1\_genomic.fna\_89:34464-35479 Satlength=1016 Nr of Repeats=5 RepeatLength=12 seed=CACCAACACC Num.seqs=3  
Similarity=1.000000

0 CACCAACACCAA

Rev.of\_GCF\_001307105.1\_ASM130710v1\_genomic.fna\_12:24340-24400  
Satlength=61 Nr of Repeats=5 RepeatLength=12 seed=TGTTGGTGCT Num.seqs=5  
Similarity=1.000000 2

CAACAGCACCAA

GCF\_002019645.1\_ASM201964v1\_genomic.fna\_1:657555-657687 Satlength=133 Nr of Repeats=11 RepeatLength=12 seed=GCACCGACAC Num.seqs=11  
Similarity=0.963636 5

CACCAGCACCGA

\*\* \*\* \*\*\*\*\* \*

Consensus:

CACcAgCACCaA

>Bacillus\_Fam\_372\_12\_3 Nr. of seq. 3 Alignment length(with gaps) = 12  
Alignment score = 1.000000

GCF\_001273755.1\_ASM127375v1\_genomic.fna\_17:544037-544637 Satlength=601 Nr of Repeats=50 RepeatLength=12 seed=CCGTAACCGC Num.seqs=50  
Similarity=1.000000 0

CCGTAACCGCCG

GCF\_001273755.1\_ASM127375v1\_genomic.fna\_17:1499377-1499425 Satlength=49  
Nr of Repeats=4 RepeatLength=12 seed=CCGTAACCGC Num.seqs=4  
Similarity=1.000000 0  
CCGTAACCGCCG  
GCF\_001584325.1\_ASM158432v1\_genomic.fna\_41:69109-69169 Satlength=61 Nr of  
Repeats=5 RepeatLength=12 seed=CCGTAACCGC Num.seqs=5 Similarity=1.000000  
0 CCGTAACCGCCG

\*\*\*\*\*

Consensus:

CCGTAACCGCCG

>Bacillus\_Fam\_373\_12\_3 Nr. of seq. 3 Alignment length(with gaps) = 12  
Alignment score = 0.777778  
GCF\_001375535.1\_Bacillus\_niameyensis\_genomic.fna\_6:1155105-1155231  
Satlength=127 Nr of Repeats=8 RepeatLength=12 seed=TGGCCCTGAC Num.seqs=6  
Similarity=0.844444 0  
TGGCCCTGACCT  
GCF\_001591425.1\_ASM159142v1\_genomic.fna\_5:37834-37894 Satlength=61 Nr of  
Repeats=4 RepeatLength=12 seed=CCTTGCCCTT Num.seqs=3 Similarity=0.925926  
3 TGACCTTGCCCT  
GCF\_001591805.1\_ASM159180v1\_genomic.fna\_7:139777-139831 Satlength=55 Nr  
of Repeats=4 RepeatLength=12 seed=TTGACCTTGA Num.seqs=3  
Similarity=0.777778  
5 TGACCTTGACCT

\*\* \*\* \*

Consensus:

TGACCTTGACCT

>Bacillus\_Fam\_374\_12\_3 Nr. of seq. 3 Alignment length(with gaps) = 12  
Alignment score = 0.777778  
GCF\_001591465.1\_ASM159146v1\_genomic.fna\_69:93-309 Satlength=217 Nr of  
Repeats=17 RepeatLength=12 seed=GAAGCAGAAG Num.seqs=15  
Similarity=0.835979  
0 GAAGCAGAAGCA  
Rev.of\_GCF\_001591465.1\_ASM159146v1\_genomic.fna\_75:8-188 Satlength=181 Nr  
of Repeats=13 RepeatLength=12 seed=TCTGCTTCTG Num.seqs=9  
Similarity=0.824074 2  
GAAGCAGAAGCA  
Rev.of\_GCF\_001654695.1\_ASM165469v1\_genomic.fna\_3:76041-76089 Satlength=49  
Nr of Repeats=4 RepeatLength=12 seed=TTCTGATTCA Num.seqs=4  
Similarity=1.000000 3  
GAAACTGAATCA

\*\*\* \* \*\*\* \*\*

Consensus:

GAAgCaGAAgCA

>Bacillus\_Fam\_375\_240\_2 Nr. of seq. 2 Alignment length(with gaps) = 240  
Alignment score = 0.920833

GCF\_001645705.1\_ASM164570v1\_genomic.fna\_61:170578-171538 Satlength=961 Nr of Repeats=4 RepeatLength=240 seed=GGTTGGGCGA Num.seqs=4  
Similarity=0.727375 0

GGTTGGGCGAAAGTGAATGTAAATGGGAAAACAGGATATGTAAGTAGTCAGTATTTAACAGGCAAGACGAACA  
CAGCCCCANCAAAAACCATCTACATCCACACCAGCAAAGACGGAAACAAAATATGTATCTGTAACTCAGGTTC  
TATTTTGAATCTACGCAGTAGTGCCAGTACAAGTGCATCAATAATCGGGAACCTATCAAATGGCACAGCGGTA  
ACGGTTCAATCAGATTCCAAA

GCF\_001645705.1\_ASM164570v1\_genomic.fna\_61:170794-172355 Satlength=1562  
Nr of Repeats=7 RepeatLength=240 seed=GTAACGGTTC Num.seqs=6  
Similarity=0.815768 216

GGTTGGGCGAAAGTGAAGTGTAAATGGGAAAACAGGGTATGTAAGTAGTCAATATTTAACAGGCAAGACGAACA  
CAGCCCCATCAAAAACCGTCAACATCCACACCAGCAAAGACGGAAACAAAATATGTATCTGTAACTCAGGTTC  
TANTTTGAATCTACGCAGTAGTGCNAGTACAAGTGCTTCGATAATCGGGAGCCTAACAAATGGCACAGCAGTA  
ACGGTTCAATCAGATTCCAAT

\*\*\*\*\*  
\*\*\*\*\*  
\*\*\*\*\*  
\*\*\*\*\*  
\*\*\*\*\*

Consensus:

GGTTGGGCGAAAGTGAaTGTAATGGGAAAACAGGaTATGTAAGTAGTCAaTATTTAACAGGCAAGACGAACA  
CAGCCCCAtCAAAACCaTcACATCCACACCAGCAAAGACGGAAACAAAATATGTATCTGTAACTCAGGTTC  
TAtTTTGAATCTACGCAGTAGTGCCaAGTACAAGTGCaTcATAATCGGGAaCcTAAcAAATGGCACAGCaGTA  
ACGGTTCAATCAGATTCCAAa

>Bacillus\_Fam\_376\_210\_2 Nr. of seq. 2 Alignment length(with gaps) = 210  
Alignment score = 0.853968  
GCF\_000612625.1\_JCE\_genomic.fna\_21:59255-61145 Satlength=1891 Nr of  
Repeats=8 RepeatLength=210 seed=GGCTGGTACA Num.seqs=7  
Similarity=0.674093  
0

GGCTGGTACAGTGATGAAGCACGAACGAATTTGTACGATTTTAATGAGCCAGTNAAAGCAGCGACAAAGTTGT  
ATGCGAAATGGACNCATAATCAATATGAAGTCAATTTTGATACNAATGGCGGCAGTNANATTGCTTCGAAAA  
TGTGAANTACAATGAAAAAGCAANGAAGCCANNNGNACCAACGAAAGAAGGTACACCTTCGCN

GCF\_000612625.1\_JCE\_genomic.fna\_21:59327-62057 Satlength=2731 Nr of  
Repeats=13 RepeatLength=210 seed=TATGCGAAAT Num.seqs=13  
Similarity=0.617769

72  
GGCTGGTACAGTGATGAAGCACTAACGAATTTGTACGATTTTGANGNGCCAGTNAAAGCAGCNANGANNTTGT  
ATGCGAAATGGACCCATAATCAATATGAAGTAAGTTTGTGATACNAATGGCGGNAGTNANGTTGCTTCTGAAAA  
TGTGAANTACAATGAAAAAGCNANGAAGCCAGNAGTACCAACGAAAGAAGGCTACACCTTCGCN

\*\*\*\*\*  
\*\*\*\*\*  
\*\*\*\*\*

Consensus:

GGCTGGTACAGTGATGAAGCACgAACGAATTTGTACGATTTTATaAtGaGCCAGTNAAAGCAGCgAcaAagTTGT  
ATGCGAAATGGACcCATAATCAATATGAAGTAaAaTTTTGATACNAATGGCGGcAGTNANaTTGCTTCgAAAA  
TGTGAANTACAATGAAAAAGCaANGAAGCCAgNaGtACCAACGAAAGAAGGcTACACCTTCGCN

>Bacillus\_Fam\_377\_200\_2 Nr. of seq. 2 Alignment length(with gaps) = 200  
Alignment score = 0.746667  
GCF\_001591665.1\_ASM159166v1\_genomic.fna\_21:41016-42003 Satlength=988 Nr  
of Repeats=5 RepeatLength=198 seed=ATTGATAAAA Num.seqs=4  
Similarity=0.606986  
0  
ATTGATAAAACAGCTCCAGTCGTAACCTGGTGTAGAAACAAACGGTCTTTACAATAATGATGTAAACAGTTTCA  
TTTAATGAAGGAACAGCGACATTAAATGGTAAAGCAGTGAAAACCTGGAACAGTAGTTAAAACAA-  
ATGGAACCTTACACAGTAGTGGTAACAGATGCAGCAGGAAACAAAACAACCTGTGAAGTTCACG  
GCF\_001591665.1\_ASM159166v1\_genomic.fna\_21:46294-47278 Satlength=985 Nr  
of Repeats=5 RepeatLength=198 seed=ATTGATAAAA Num.seqs=3  
Similarity=0.493290  
0 ATTGATAAAACNGCTCCAGTNGTAAGTGGAGTTA-  
AAAAACNACGGCCTNTACAATCAAGATGTGACANTTTCNTTTAATGAAGGAACNGCNACATTAAATGGTAANGA  
ANTTNCATCTGGTACAGCAGTTAANCCAAGANGANNCTATACANTAGTGGTAACCGACGCAGCAGGNAATAA  
AACCACNGTTAAGTTCACN

\*\*\*\*\*  
\*\*\*\*\*  
\*\*

Consensus:

ATTGATAAAACaGCTCCAGTcGTAAcTGGaGTTAgAAaACaACGGcCTtTACAATaAaGATGTaACAgTTTCa  
TTTAATGAAGGAACaGCgACATTAAATGGTAAaGaAgTgaaAaCTGGaACAGcAGTTAAaaCAAgAtGGAacc  
TAcACAgTAGTGGTAACaGAcGCAGCAGGaAAcAAAACaActGtGAAAGTTCACg

>Bacillus\_Fam\_378\_154\_2 Nr. of seq. 2 Alignment length(with gaps) = 154  
Alignment score = 0.696970  
GCF\_000177235.2\_ASM17723v2\_genomic.fna\_1:694972-695711 Satlength=740 Nr  
of Repeats=5 RepeatLength=145 seed=ACATGTGGCA Num.seqs=3  
Similarity=0.993870  
0 ACATGTGGCATCATTTCTTTACCGCTTCTAAGAAAAACGAAAACTCG-TT---T---  
TTCGTTTTTCAT-AAAAGATATGAGAGT-  
ATAAAATATGGCGGTGGAAATGAAGCCACGCGTAGTAGTGAGAAGAGCACTCACTACTACTTTAAAA  
Rev.of\_GCF\_000177235.2\_ASM17723v2\_genomic.fna\_1:2996165-2996769  
Satlength=605 Nr of Repeats=4 RepeatLength=151 seed=CTAAAAACGA  
Num.seqs=4 Similarity=0.986755

69  
ACATGTGGCATCACTTCTTACCgCTTCTAAGAAAAACCTAAAAACGAGCTTCACTAAGCTCGTTTTTAGTCTA  
TTCATAAGA-AGTGCTAAAA-A-  
GGCGGTGGAAAGTGATGCCACGCGTAGTAGAGAGAAGAGCACTCACTACTACTTTAAAG

\*\*\*\*\*  
\*\*\*  
\*\*\*\*\*

Consensus:

ACATGTGGCATCACTTCTTcACCGCTTCTAAGAAAAaCgAAAAACgAGcTTcacTaagcTCGTTTTTaaTcaA  
aacATAaGAgAGTgaTAAAAAtAtGGCGGTGGAAaTGAaGCCACGCGTAGTAGaGAGAAGAGCACTCACTACTA  
CTTTAAAAa

>Bacillus\_Fam\_379\_153\_2 Nr. of seq. 2 Alignment length(with gaps) = 153  
Alignment score = 0.644880

GCF\_900111815.1\_PRJEB17078\_genomic.fna\_1:368570-369663 Satlength=1094 Nr  
of Repeats=8 RepeatLength=150 seed=GATAAGTCAA Num.seqs=7  
Similarity=0.990688 0

GATAAGTCAACATCGATTTCGCTATCGCTCATCGTGTTTCCTTTATCTCGAT-  
CGAAACCTCCAGGCCGTACAGCGCTAAACGGGCGCTCCGCTTTTCTATTGTCCAGCTTCAGCGCCCA-  
GCGCTTATCGTCCTTCGGCTTTCTC-CCTAC  
Rev.of\_GCF\_000171615.1\_ASM17161v1\_genomic.fna\_137:4281-4859 Satlength=579  
Nr of Repeats=4 RepeatLength=152 seed=AAGAAAAGCG Num.seqs=3  
Similarity=0.740977 101  
AATAAGTCAACATCGAATCGCTGACGCTCTTCGTGTTTCCTTTATTTTGATGCCAAGCCCTCCAATCCATACG  
CCCCTAAACAGTCGGCTCCGCTTTTCT-  
TTGTCCAGCTCCGCCTCCTAGGGGCTAATGGATTTNCGGTCTTGTCACCTTC

\*\*\*\*\*  
\* \* \* \* \*  
\*\*\* \*

Consensus:

aATAAGTCAACATCGAaTCGCTaaCGCTCaTCGTGTTTCCTTTATcTcGATgCcAAaCCCTCCAagCCaTACa  
cCcCTAAAcAgGcGccTCCGCTTTTCTaTTGTCCAGCTcCacCgCCcAgGcGCTaATcGaccTtCGGccTtCt  
CaCCTaC

>Bacillus\_Fam\_380\_148\_2 Nr. of seq. 2 Alignment length(with gaps) = 148  
Alignment score = 0.718468  
GCF\_000832605.1\_ASM83260v1\_genomic.fna\_1:988424-988982 Satlength=559 Nr  
of Repeats=4 RepeatLength=147 seed=TAGATGAGGC Num.seqs=3  
Similarity=0.724087  
0

TAGATGAGGCGACAAAAGAAAAAGCGAAGTCCATTTTTGAGCAAGAAAAGTCCGGAACATTAACCTCGTGAGCA  
AGCAAAAGAGAAATTGAAAGAACTAGGCGTGAAATTCCCAGAGAAAGGG-  
AAGCACGGTGATATGTTTCGCGAATT  
GCF\_001645555.1\_ASM164555v1\_genomic.fna\_23:264674-265262 Satlength=589 Nr  
of Repeats=4 RepeatLength=147 seed=AAAGAAAAAG Num.seqs=4  
Similarity=0.756006 14  
TAGACGAAGCAACAAAAGAAAAGCGAATCAATCTTAGAACAAGAAAATCCGGCAAACTAACACGTGAACA  
AGCAAAAGAAGAATTAAACAAAGCTAGGTGTGAAATTCCCGAGAGAAAGGNTAAGCATGAAGACATGTTTGCTAA  
CT

\*\*\*\* \* \* \* \* \*  
\*\*\*\*\* \* \* \* \* \*  
\*\* \*

Consensus:

TAGAcGAaGCaACAAAAGAAAAAGCGAAaTCaATcTTaGAaCAAGAAAAaTCCGGaAaAcTAACaCGTGAaCA  
AGCAAAAGAaaAATTaAaAaAaCTAGGcGTGAAATTCCCAGAGAAAGGgtAAGCAcGaaGAcATGTTcGCgAA  
cT

>Bacillus\_Fam\_381\_145\_2 Nr. of seq. 2 Alignment length(with gaps) = 145  
Alignment score = 0.671264  
GCF\_001591825.1\_ASM159182v1\_genomic.fna\_6:118986-119562 Satlength=577 Nr  
of Repeats=4 RepeatLength=144 seed=CCACCATTTA Num.seqs=4  
Similarity=0.524024 0  
CCACCATTTATGCCACAGATTATCGTTGTTTCCACGGACAAAGGTATCGATCCGATTGGCTCCCCATGATAAG  
GCAGCCGG-AGAACCCTTCAACCCACGCCGCGGAGCTCCAAGGTCCTCCCACTCACTCCAGCTTGAACCGTC

GCF\_900094975.1\_IMG-  
taxon\_2617270721\_annotated\_assembly\_genomic.fna\_4:152867-153443  
Satlength=577 Nr of Repeats=4 RepeatLength=144 seed=ACCATTTATG  
Num.seqs=4 Similarity=0.507358 2  
CCACCATTATGCCACATCTGGTCGTTGTCTCCNCTGACAAATGTATCAATGCGGTTTCGNCCCCATGATAAA  
GCTCCCGGTGGATCCCTNGAAACCGCCGCGGGTGCCCCGAGATCTTCCCAATCGCTCCAGCGCGAACCATC

\*\*\*\*\* \* \*\*\*\*\* \*\* \* \*\*\*\*\* \*\* \* \* \* \*\*\*\*\*  
\*\* \*\*\*\* \*\* \*\*\*\* \*\* \* \*\*\*\*\* \*\* \* \* \* \*\*\*\*\* \*\* \*\*\*\*\* \*\*  
Consensus:

CCACCATTATGCCACAgATgaTCGTTGTtTCCaCgGACAAAgGTATCaATcCGaTTcGccCCCCATGATAAA  
GCacCCGGTaGAaCCCTtcAAaCCaCccCGCGGaGcCCaAGaTCcTCCCAaTCaCTCCAGCGcGAACCATC

>Bacillus\_Fam\_382\_140\_2 Nr. of seq. 2 Alignment length(with gaps) = 140  
Alignment score = 0.814286  
GCF\_900107275.1\_IMG-  
taxon\_2675903024\_annotated\_assembly\_genomic.fna\_46:1002-1551  
Satlength=550 Nr of Repeats=4 RepeatLength=139 seed=ATCGTCCGAA  
Num.seqs=3 Similarity=1.000000 0  
ATCGTCCGAAACTATATAACGCCGCGGGGTGGAGCAACGAGCAATGCATCAGTGAAAAAGCAACGAGTTGTC  
TCGACGCATAAGCAGCGGAGTAAAGCAGGAAGAGGAAGAGACAGTCAAAGGACATCGAAGC-AGAGC  
GCF\_900107275.1\_IMG-  
taxon\_2675903024\_annotated\_assembly\_genomic.fna\_19:46687-47426  
Satlength=740 Nr of Repeats=6 RepeatLength=140 seed=AAGGACGTCTG  
Num.seqs=4 Similarity=0.972813 120  
ATCGTCCGTAAACTTTAAACGTCGCGGGGTGGAGCAACGAGCGAAGCATCATTGAAAAACAGCGAGTTGTC  
TCGACGCATTCGCATCGAAGCGAAGCAAGAAGAGGAAGAGACAGTCAAAGGACGTCTGAAGCAAAAGC

\*\*\*\*\* \*\*\*\*\* \*\* \*\*\*\*\* \* \*\*\*\*\* \*\*\*\*\* \*\*  
\*\*\*\*\* \*\* \* \* \*\*\*\*\* \*\*\*\*\* \*\*\*\*\* \*  
\*\*\*  
Consensus:

ATCGTCCGaAAACTaTAaAACGcCGCGGGGTGGAGCAACGAGCaAaGCATCAGtGAAAAaCAaCGAGTTGTC  
TCGACGCATaaGCAgCGaAGcaAAGCAaGAAGAGGAAGAGACAGTCAAAGGACaTCGAAGCaAaAGC

>Bacillus\_Fam\_383\_138\_2 Nr. of seq. 2 Alignment length(with gaps) = 138  
Alignment score = 0.990338  
GCF\_001517115.1\_ASM151711v1\_genomic.fna\_1:286089-286917 Satlength=829 Nr  
of Repeats=6 RepeatLength=138 seed=GTTGTCTCGG Num.seqs=6  
Similarity=0.875040 0  
GTTGTCTCGGAAGCGAGGCTTCGTGAAGAGCAGGAAAATGAAGAGGAAGAAGCTGAGCGGTCTAGCGCCATTGG  
CTTTAAAAGCAGAGGAAAGCGGCGGTATAAAAGCAGAAGAAGCGCCAGCTGAGCCGCCAGAGCTT  
GCF\_001517135.1\_ASM151713v1\_genomic.fna\_26:157017-157839 Satlength=823 Nr  
of Repeats=6 RepeatLength=138 seed=GGCTTCGTGA Num.seqs=5  
Similarity=0.884058 16  
GTTGTCTCGGAAGCGAGGCTTCGTGAAGAGCAGGAAAATGAAGAGGAAGAAGCTGAGCGGTCTAGCGCCATTGG  
CTTTAAAAGCAGAGGAAAGCGGCGGTATAAAAGCAGAAGAAGCGCCAGCTGAGCCGCCGAGCTT

\*\*\*\*\*  
\*\*\*\*\*  
Consensus:



GTTGTCTCGGAAGCGAGGCTTCGTGAAGAGCAGGAAAAATGAAGAGGAAGAAGCTGAGCGGTCAGCGCCATTGG  
CTTTAAAAGCAGAGGAAAGCGGCGGTATAAAAGCAGAAGAAGCGCCAGCTGAGCCGCCaGAGCTT

>Bacillus\_Fam\_384\_128\_2 Nr. of seq. 2 Alignment length(with gaps) = 128  
Alignment score = 0.695312

GCF\_001877785.1\_PlanoSAMM\_genomic.fna\_85:203375-204000 Satlength=626 Nr  
of Repeats=5 RepeatLength=125 seed=AGCTCGAGGT Num.seqs=5  
Similarity=0.978667

0 AGCTCGAGGTCATAAGCTAACTTACCAAAAAGGCCAAGAGCGCCTTTCCGGTAAGT--  
TCATCTTATGCTTGTGCTCCTGAGCGAGCCGCTCCGCTTTTCT-GTTGTCCAGCTACGGCGGCTAGG  
GCF\_001274775.1\_ASM127477v1\_genomic.fna\_3:67013-67766 Satlength=754 Nr of  
Repeats=6 RepeatLength=126 seed=CTTATGCTTG Num.seqs=4  
Similarity=0.741602  
62 CCCTCGAGGTCATAAGCCAAAAACCCCAAAAAGGCCAAAGAAGCGCCTTTCCGG-  
GAGTCTTCGTCTTATGCTTGTGCTCCTCAGAGCAACCCNCCTCCGCTTTTCTACATGTCCAGCTCCGGCGCGTT  
GA

\*\*\*\*\*  
\*\*\*\*\*  
Consensus:

acCTCGAGGTCATAAGCcAAAaacaCCAAAAGGCaAAGaACGCCTTTCCGGtaAGTctTCaTCTTATGCTTG  
TCGcCcCaGAGCaAcCCgCCTCCGCTTTTCTacaTGTCCAGCTaCGGCGccTaGa

>Bacillus\_Fam\_385\_127\_2 Nr. of seq. 2 Alignment length(with gaps) = 127  
Alignment score = 0.616798

GCF\_000812025.2\_ASM81202v2\_genomic.fna\_49:98712-99319 Satlength=608 Nr of  
Repeats=5 RepeatLength=121 seed=TTGCTTTTC Num.seqs=3  
Similarity=0.963269

0 TTGCTTTTCTCTTGTCCAGCTGCAGCGC-CTTGCTCCTCG-  
GGTCAAATAACCTTCCTCCATGAAGCCAAAGAGCGG-CTTCTTG-GC-  
GGAAGAACATTTGCCGGTCGGAGCAGAACAGGCG-CT  
Rev.of\_GCF\_002019605.1\_ASM201960v1\_genomic.fna\_1:2798720-2799338  
Satlength=619 Nr of Repeats=5 RepeatLength=124 seed=AAGAAAAGCG  
Num.seqs=3 Similarity=0.863799  
12 TCCGCTTTTCT-TTGTCTAGCTGCAG-  
GCTCTAGCCCTCGAGGTTAAATAACCTACCTGAAAAAAGTCAAAAAGCGGACTT-  
TTGTTcAGTCAGAACATTTACTTGTCGGGGCTGACCAAGAGCCT

\*  
\*\*\*\*\*  
Consensus:

TcCGCTTTTCTcTTGTCCaGCTGCAGcGCTcTaGCcCCTCGaGGTcAAATAACCTaCCTcaAaaAAGcCAAAa  
AGCGGaCTTcTTGtgCaGgaAGAACATTTaCcgGTCGgaGCaGAaCAaGaGcCT

>Bacillus\_Fam\_386\_127\_2 Nr. of seq. 2 Alignment length(with gaps) = 127  
Alignment score = 0.619423

GCF\_000812025.2\_ASM81202v2\_genomic.fna\_36:56533-57148 Satlength=616 Nr of  
Repeats=5 RepeatLength=123 seed=AGCTAGACAA Num.seqs=5  
Similarity=0.666929

0 -AGCTAGACA-A-C-

\* \* \* \* \*

Consensus:

GTTCGTTTCGCTTCTTCTTGGTCCATTTGCCCCGGCAACGCCTCGGTTCCACTCATTACCTCTGCCTCTTCAAT  
CTCTGGTTCCCCGCGTCCATACC

>Bacillus\_Fam\_389\_84\_2 Nr. of seq. 2 Alignment length(with gaps) = 84  
Alignment score = 0.603175  
GCF\_000429725.1\_ASM42972v1\_genomic.fna\_2:377721-378441 Satlength=721 Nr  
of Repeats=5 RepeatLength=83 seed=TGGCGAGCTT Num.seqs=3  
Similarity=0.828648  
0 TGGCGAGCTTTCCGCT-  
CGGGGCGTCGCGTTTCGTCCCGTACCTCGACGTACCTCTCGCCTCCAGTGGCGAGGCGGTCCCCATG  
Rev.of\_GCF\_000429725.1\_ASM42972v1\_genomic.fna\_25:9598-10275 Satlength=678  
Nr of Repeats=5 RepeatLength=84 seed=CTCGCCAAAC Num.seqs=3  
Similarity=0.813953 7  
TGGCGAGGTTGGGGCNGCGAGTCGACGAGGTTGGGAGCATACCTCGACGTACCTCTNCCTTCCAGTGGCGAGG  
TAGCGACCGTT

\*\*\*\*\* \*\* \*\* \* \*\* \*\* \* \* \* \*\*\*\*\* \* \*\*\*\*\*  
\* \*\* \*

Consensus:

TGGCGAGcTTgccGctgCGaGgCGaCGaGGTTcGgacCaTACCTCGACGTACCTCTccCcTCCAGTGGCGAGG  
caGccaCCaTg

>Bacillus\_Fam\_390\_84\_2 Nr. of seq. 2 Alignment length(with gaps) = 84  
Alignment score = 0.904762  
GCF\_000496285.1\_ASM49628v1\_genomic.fna\_1:3671784-3672105 Satlength=322 Nr  
of Repeats=4 RepeatLength=84 seed=GGAAAAGTAA Num.seqs=3  
Similarity=0.904762 0  
GGAAAAGTAACAGCAGGTTTAAATACGTAAATGGCAAAACGGGTGAGATGCAGACTGGTATAGGGAAATTAG  
TAGACGGTTCA  
Rev.of\_GCF\_000775975.1\_ASM77597v1\_genomic.fna\_1:3704249-3704585  
Satlength=337 Nr of Repeats=4 RepeatLength=84 seed=TTTGCTATTT Num.seqs=4  
Similarity=0.846561 39  
GGAAAAGTAACAGCTGGTTTAAATACGTAAATAGCAAAACAGGTGAGATGCAGACTGGTATAGGGAAATTAG  
TAGATGGGTCT

\*\*\*\*\* \*\*\*\*\*  
\*\*\*\*\* \*\* \*\*

Consensus:

GGAAAAGTAACAGCaGGTTTAAATACGTAAATaGCAAAACaGGTGAGATGCAGACTGGTATAGGGAAATTAG  
TAGAcGGgTCa

>Bacillus\_Fam\_391\_78\_2 Nr. of seq. 2 Alignment length(with gaps) = 78  
Alignment score = 0.914530  
GCF\_000245335.1\_ASM24533v1\_genomic.fna\_3:543340-543808 Satlength=469 Nr  
of Repeats=6 RepeatLength=78 seed=GAAGATCTTG Num.seqs=6  
Similarity=0.949858  
0  
GAAGATCTTGGTGACCGATATGATTTGGAAGAACTTTTGAATCTGATGAACGATCATATGTTGACGATTGAT  
AATCT

GCF\_001517115.1\_ASM151711v1\_genomic.fna\_24:533324-533636 Satlength=313 Nr  
of Repeats=4 RepeatLength=78 seed=CTGAAGATCT Num.seqs=4  
Similarity=0.900285 76  
GAAGATCTTGATGACCGATATGATTTGGACGAACTTTTGGTGTCTGATGAACGATCATATTTTGACGATTGAT  
AATCT

\*\*\*\*\*  
\*\*\*\*\*

Consensus:

GAAGATCTTGaTGACCGATATGATTTGGAaGAACTTTTGaTCTGATGAACGATCATATgTTGACGATTGAT  
AATCT

>Bacillus\_Fam\_392\_75\_2 Nr. of seq. 2 Alignment length(with gaps) = 75  
Alignment score = 0.951111  
GCF\_000217835.1\_ASM21783v1\_genomic.fna\_1:1910042-1910492 Satlength=451 Nr  
of Repeats=6 RepeatLength=75 seed=CTTTCCGCCA Num.seqs=6  
Similarity=0.732148 0  
CTTTCCGCCAACGATGCCGACTCATTTTTACCAGAAACTCCGGNTCGGCCTGCCATTTCATCCTGCGCCACTC  
CA  
GCF\_000832905.1\_ASM83290v1\_genomic.fna\_1:924148-924448 Satlength=301 Nr  
of Repeats=4 RepeatLength=75 seed=CTTTCCGCCA Num.seqs=4  
Similarity=0.694815  
0  
CTTTCCGCCAACGATGCCGACTCATTTTTACCAGAAACTCCGGNTCGGCCTGCCATTTCATCCTGCACCACTC  
CA

\*\*\*\*\*  
\*\*\*\*\*

Consensus:

CTTTCCGCCAACGATGCCGACTCATTTTTACCAGaAAACTCCGGNTCGGCCTGCCATTTCATCCTGCaCCACTC  
CA

>Bacillus\_Fam\_393\_74\_2 Nr. of seq. 2 Alignment length(with gaps) = 74  
Alignment score = 0.689189  
GCF\_000299035.1\_ASM29903v1\_genomic.fna\_4:316574-316862 Satlength=289 Nr  
of Repeats=4 RepeatLength=72 seed=TTCTGCTGCT Num.seqs=4  
Similarity=0.969136  
0  
TTCTGCTGCTTGTCTTCTGTTTGGCTGTTTGTTCCTTTTCATCAGCAGAACCATTGTTGATTCTCTTCC-  
-  
GCF\_000712615.1\_ASM71261v1\_genomic.fna\_2:364691-365123 Satlength=433 Nr  
of Repeats=6 RepeatLength=72 seed=TCTTTTGAC Num.seqs=6  
Similarity=0.987654  
67 TTGACCT--  
TTGTCAATCAGTTTTACTGTTTGTGCTTTTTCCTCAGTAGAACCGTTCGTTGATTCTCTTCTTT

\*\* \*\* \* \* \* \* \*  
Consensus:

TTcacCTgcTTGTcATCaGTTTgaCTGTTTGTGcCTTTTCaTCAGcAGAACCATTcGTTGATTCTCTTCct  
t

>Bacillus\_Fam\_394\_67\_2 Nr. of seq. 2 Alignment length(with gaps) = 67  
Alignment score = 0.611940  
GCF\_000787375.1\_ASM78737v1\_genomic.fna\_58:8-403 Satlength=396 Nr of  
Repeats=6 RepeatLength=66 seed=GTCATATCTC Num.seqs=5 Similarity=0.538889  
0 GTCATATCTCCATCTAATCCGTTGCTGTGATATGATATNAAT--C-GTNTATTTCTGNATNNGNTAT  
Rev.of\_BACILLUS\_PSEUDALCALIPHILUS\_genomic.fna\_2:420902-424028  
Satlength=3127 Nr of Repeats=37 RepeatLength=66 seed=TCACAGCAAC  
Num.seqs=34 Similarity=0.260606  
30 GTCATATCTCCATCTATTCCGTTGCTGTGATATGAT-NNAATGNCNNTATCNNNCNNTATNCNTNAN

\*\*\*\*\*  
Consensus:

GTCATATCTCCATCTAaTCCGTTGCTGTGATATGATatNAATgnCngTaTatttCtgtATNcgttAt

>Bacillus\_Fam\_395\_66\_2 Nr. of seq. 2 Alignment length(with gaps) = 66  
Alignment score = 0.626263  
GCF\_000712595.1\_ASM71259v1\_genomic.fna\_18:68568-69048 Satlength=481 Nr of  
Repeats=8 RepeatLength=60 seed=TGGTACTACT Num.seqs=8 Similarity=0.619243  
0 TGGTACTACTT---GAATNA--TAGCGGTGCAATGCAAACAGGTTGGTTGTATGACGATGNAAC  
GCF\_000161455.1\_ASM16145v1\_genomic.fna\_1:1154071-1154599 Satlength=529 Nr  
of Repeats=10 RepeatLength=66 seed=TGAAAACAGG Num.seqs=6  
Similarity=0.797678 34  
TGGTATTACTTGGATGAAGCAGCTAGCGGAGCAATGAAAACAGGTTGGTTGAAATACGGAGAAAAT

\*\*\*\*\*  
Consensus:

TGGTAcTACTTggatGAAGcAgcTAGCGGaGCAATGaAAACAGGTTGGTTGaAagACGaaGaAAAc

>Bacillus\_Fam\_396\_62\_2 Nr. of seq. 2 Alignment length(with gaps) = 62  
Alignment score = 0.618280  
GCF\_000712595.1\_ASM71259v1\_genomic.fna\_8:140638-141178 Satlength=541 Nr  
of Repeats=9 RepeatLength=60 seed=GGTGTAATGC Num.seqs=9  
Similarity=0.730747  
0 GGTGTAATGCAAACAGGTTGGCACAAAGAT-GG-AGGAAGTTGGTACTACTTTGGCNCAAAC  
Rev.of\_GCF\_000752035.1\_Bacillus\_rubiinfantis\_genomic.fna\_11:343119-343839  
Satlength=721 Nr of Repeats=8 RepeatLength=60 seed=CCAGCCGGTT Num.seqs=7  
Similarity=0.904762 21  
GGTGTAATGCAAACCGGCTGGGA-AAAGATCGGCAGCAAG-AAGTATTACTTCGACAAAAAT

\*\*\*\*\*  
Consensus:

GGTGTAATGCAAACaGGcTGGcAcAAAGATcGGcAGcAAGtaaGTAcTACTTcGaCaaAAAc

>Bacillus\_Fam\_397\_61\_2 Nr. of seq. 2 Alignment length(with gaps) = 61  
Alignment score = 0.661202  
GCF\_001591805.1\_ASM159180v1\_genomic.fna\_17:178840-179140 Satlength=301 Nr  
of Repeats=4 RepeatLength=60 seed=TGGTGCGATG Num.seqs=3  
Similarity=0.589065 0  
TGGTGCGATGAAAACNGGCTGGGT-TAAACCTGGCTCCACTTGGTATTACTTAGATAAAAG  
GCF\_001591805.1\_ASM159180v1\_genomic.fna\_46:18986-19349 Satlength=364 Nr  
of Repeats=5 RepeatLength=60 seed=TGGTATTACT Num.seqs=3

Similarity=0.608379

40 TGGTGCGATGAAGACNGGTTGGTTNTTAA-CTGGTGNGAAATGGTATTACTTAGAAAAAA

\*\*\*\*\* \* \* \* \* \* \* \* \* \* \*

Consensus:

TGGTGCGATGAAaACNGGcTGGgTnTaAAcCTGGcgccAaaTGGTATTACTTAGAaAAAAa

>Bacillus\_Fam\_398\_60\_2 Nr. of seq. 2 Alignment length(with gaps) = 60

Alignment score = 0.911111

GCF\_000508325.1\_BAVI\_1\_genomic.fna\_45:24041-24284 Satlength=244 Nr of Repeats=4 RepeatLength=60 seed=AAATGGTACT Num.seqs=3 Similarity=0.573477

0 AAATGGTACTATCTTAACGCAAACGGCGACATGGCAACAGGCTGGAAGCTGGTTAGCGGA

GCF\_001591805.1\_ASM159180v1\_genomic.fna\_13:17036-17279 Satlength=244 Nr of Repeats=4 RepeatLength=60 seed=AAATGGTACT Num.seqs=3 Similarity=0.585185

0 AAATGGTACTACCTTAACGCAAACGGCGAAATGGCAACAGGCTGGAACTGGTTAGCGGC

\*\*\*\*\*

Consensus:

AAATGGTACTAcCTTAACGCAAACGGCGAaATGGCAACAGGCTGGAAaCTGGTTAGCGGa

>Bacillus\_Fam\_399\_60\_2 Nr. of seq. 2 Alignment length(with gaps) = 60

Alignment score = 0.811111

GCF\_000508325.1\_BAVI\_1\_genomic.fna\_65:18797-19643 Satlength=847 Nr of Repeats=6 RepeatLength=60 seed=AAATGGTACT Num.seqs=4 Similarity=0.637978

0 AAATGGTACTACCTCCAAGCTGACGGCGCNATGAAAACCGGCTGGCTTAGCACAAATAAC

Rev.of GCF\_001591805.1\_ASM159180v1\_genomic.fna\_18:13670-14516

Satlength=847 Nr of Repeats=4 RepeatLength=60 seed=AGTACCATTT Num.seqs=3

Similarity=0.683060

10

AAATGGTACTTCCTNCAGGCTGATGGTTCNATGAAAACCGGCTGGCTGAGCACAAACAAC

\*\*\*\*\* \* \* \* \* \*

Consensus:

AAATGGTACTaCCTcCAaGCTGAcGGcgCNATGAAAACCGGCTGGCTgAGCACAAaAAC

>Bacillus\_Fam\_400\_60\_2 Nr. of seq. 2 Alignment length(with gaps) = 60

Alignment score = 0.716667

GCF\_000712595.1\_ASM71259v1\_genomic.fna\_1:423888-424608 Satlength=721 Nr of Repeats=12 RepeatLength=60 seed=TATTCATGTA Num.seqs=12

Similarity=0.898990

0

TATTCATGTAATACCATTTCCTCCGAATTCTANCCAGCCTGTTTGCATTACTCCGGAAC

GCF\_000712595.1\_ASM71259v1\_genomic.fna\_21:53926-54706 Satlength=781 Nr of Repeats=13 RepeatLength=60 seed=TAATACCACT Num.seqs=13

Similarity=0.900570

8 TATTTAAGTAATACCACTTACCCCAACAGATAACCAGCCTGTTTGCATTTCTCCTGAAC

\*\*\*\* \* \* \* \* \*

Consensus:

TATTCaAaGTAATACCAcTTaCCcCaAaagaTAaCCAGCCTGTTTGCATTaCTCCgGAAC

>Bacillus\_Fam\_401\_60\_2 Nr. of seq. 2 Alignment length(with gaps) = 60  
Alignment score = 0.688889  
GCF\_002019645.1\_ASM201964v1\_genomic.fna\_1:5253347-5253767 Satlength=421  
Nr of Repeats=7 RepeatLength=60 seed=CCTGGTAGTG Num.seqs=7  
Similarity=0.912169 0  
CCTGGTAGTGACCTTCGAAATTCGGTGGGTATGGTTGGTCCACTCTCCACCGTTTGGA  
GCF\_900104555.1\_IMG-  
taxon\_2651870172\_annotated\_assembly\_genomic.fna\_12:81185-81485  
Satlength=301 Nr of Repeats=5 RepeatLength=60 seed=CTCCTCCATT Num.seqs=5  
Similarity=0.964444 46  
CCTGGTAATGGGCCCTCAAAATTCGGTGGATATGGGAAATCCAACCTCCTCCATTTGGG

\*\*\*\*\* \*\* \* \* \* \*\*\*\*\* \*\*\*\*\* \* \* \* \* \*  
Consensus:

CCTGGTAaTGGaCCcTCaAAATTCGGTGGaTATGGgaaaTTCCAacCTCCaCCaTTTGGA

>Bacillus\_Fam\_402\_57\_2 Nr. of seq. 2 Alignment length(with gaps) = 57  
Alignment score = 0.625731  
GCF\_000186145.1\_Bacillus\_sp\_2\_A\_57\_CT2\_V1\_genomic.fna\_2:649324-649688  
Satlength=365 Nr of Repeats=7 RepeatLength=52 seed=GGCTTCATGA Num.seqs=7  
Similarity=0.749326 0 -  
GGCTTCATGAAGC-NTTCATGGCGACC-TTTTC--CCGGCTTCCTTCTGTTTTTG  
GCF\_000186145.1\_Bacillus\_sp\_2\_A\_57\_CT2\_V1\_genomic.fna\_6:279533-280000  
Satlength=468 Nr of Repeats=9 RepeatLength=52 seed=CATGGCGACC Num.seqs=8  
Similarity=0.767196 18  
CGGCTTCATGAAGCACTNCATGGCGACCGTTTTTCAGCC--CTACTCNTCGATTTTTT-

\*\*\*\*\* \* \*\*\*\*\* \*\*\*\*\* \*\* \* \* \* \* \*  
Consensus:

cGGCTTCATGAAGCacTtCATGGCGACCgTTTTTCagCCggCTaCcCtTCgaTTTTTg

>Bacillus\_Fam\_403\_57\_2 Nr. of seq. 2 Alignment length(with gaps) = 57  
Alignment score = 0.605263  
GCF\_900156875.1\_PRJEB18969\_genomic.fna\_10:1559594-1559802 Satlength=209  
Nr of Repeats=4 RepeatLength=52 seed=AGATGAAGAC Num.seqs=4  
Similarity=0.790598 0  
AGATGAAGACCG-TTTATGTACCGGA---AGGCTTGAGGAAAGGTTTTTCATAGC-AG  
Rev.of\_GCF\_900156875.1\_PRJEB18969\_genomic.fna\_11:1462191-1462503  
Satlength=313 Nr of Repeats=6 RepeatLength=52 seed=CGGTCTTCAT Num.seqs=6  
Similarity=0.825786 11 -  
GATGAAGACCGCTTTA-GCATTGGATCCA-GC-AGAGGAAAGGTTCTCATAGCGAG

\*\*\*\*\* \* \* \* \* \* \* \* \* \* \*  
Consensus:

aGATGAAGACCGcTTTAtGcAccGGAtccAgGCTaGAGGAAAGGTTcTCATAGCgAG

>Bacillus\_Fam\_404\_57\_2 Nr. of seq. 2 Alignment length(with gaps) = 57  
Alignment score = 0.684211  
GCF\_900109925.1\_IMG-  
taxon\_2651870116\_annotated\_assembly\_genomic.fna\_26:134607-134815  
Satlength=209 Nr of Repeats=4 RepeatLength=53 seed=AGGAAGAAAG Num.seqs=3

Similarity=0.882600 68 AGTGGGAAGAGTCTG----  
AGGAAGAAAGGTCACCAACAAGGCCCATTGGTGCCCAA  
Rev.of\_GCF\_900109925.1\_IMG-  
taxon\_2651870116\_annotated\_assembly\_genomic.fna\_36:66229-66446  
Satlength=218 Nr of Repeats=4 RepeatLength=53 seed=ATTGGTGACC Num.seqs=3  
Similarity=0.773663 87 AGT---AAGTGT-  
TGCTAGAACAAAGAAAGGTCACCAATAAGGCTCATTGGTGCCCAA

\* \*\*\*\*\* \* \* \* \* \*

Consensus:

AacAAGAAAGGTCACCAAcAAGGCcCATTGGTGCCCAAAGTgggAAGaGTcTGctag

>Bacillus\_Fam\_405\_56\_2 Nr. of seq. 2 Alignment length(with gaps) = 56  
Alignment score = 0.636905  
GCF\_000175075.1\_ASM17507v1\_genomic.fna\_2:12013-12273 Satlength=261 Nr of  
Repeats=5 RepeatLength=52 seed=ATGAAGACCT Num.seqs=5 Similarity=0.897436  
0 ATGAAGACCTGTCCATGGCGGAA---AAGTTGGAAGAGATGTCTTCATAAGGTGG  
GCF\_900156865.1\_PRJEB18960\_genomic.fna\_3:551238-551654 Satlength=417 Nr  
of Repeats=8 RepeatLength=52 seed=ATGAAGACCT Num.seqs=8  
Similarity=0.723270  
0 ATGAAGACCTG--AANGGAGGAATTTGTAGTAGGAAGAG--GTCATCATAAGGTGG

\*\*\*\*\* \* \* \* \* \* \* \* \* \* \*

Consensus:

ATGAAGACCTGtcaAtGGaGGAAtttgaAGTaGGAAGAGatGTCaTCATAAGGTGG

>Bacillus\_Fam\_406\_56\_2 Nr. of seq. 2 Alignment length(with gaps) = 56  
Alignment score = 0.622024  
GCF\_000175075.1\_ASM17507v1\_genomic.fna\_4:76487-76903 Satlength=417 Nr of  
Repeats=8 RepeatLength=52 seed=TCTCTGTTAC Num.seqs=8 Similarity=0.834249  
0 TCTCTGTTACCGTTTTTCCTGTTT--GAATCGCAGTTCGGGCACTGAGACCGCC-  
Rev.of\_GCF\_000175075.1\_ASM17507v1\_genomic.fna\_32:624889-625097  
Satlength=209 Nr of Repeats=4 RepeatLength=52 seed=GTCTCTGTGC Num.seqs=4  
Similarity=0.868973 48  
TCTCTCTTACCG-TTTTCCTTTTTCCCGAA--GTCTTTCGGGCACAGAGA-CGCCT

\*\*\*\*\* \*\*\*\*\* \* \* \* \* \* \* \* \* \* \*

Consensus:

TCTCTcTTACCGtTTTTCTGtTTTcccGAAtcGcagTTCGGGCACaGAGAcCGCct

>Bacillus\_Fam\_407\_56\_2 Nr. of seq. 2 Alignment length(with gaps) = 56  
Alignment score = 0.601190  
GCF\_001636345.1\_ASM163634v1\_genomic.fna\_1:2699397-2699657 Satlength=261  
Nr of Repeats=5 RepeatLength=52 seed=GTTCCTTCA Num.seqs=5  
Similarity=0.744654 0  
GTTCCTTCAAGGCTC--CCTTTTCTCTGCTGACGGGCACTTTC-GC-CACAACTTA  
Rev.of\_GCF\_001636345.1\_ASM163634v1\_genomic.fna\_1:1077933-1078141  
Satlength=209 Nr of Repeats=4 RepeatLength=52 seed=AAGTGCCCGT Num.seqs=4  
Similarity=0.485867 39  
GTTCCTTCA-GCTCTGAGTTTTCNCT-CTGACGGGCACTTCCTGCTNNCACTTTA



\*\*\*\*\* \*\*\* \*\*\*\*        \*\*\*\*\* \*\* \*\*\*\*\* \* \*\*        \*\* \*\*\*

Consensus:

GTTCCCGTCAGGCTCtgacTTTTCTgCTGACGGGCACTTcCtGctcaCAacTTA

>Bacillus\_Fam\_408\_56\_2 Nr. of seq. 2 Alignment length(with gaps) = 56  
Alignment score = 0.669643  
GCF\_002019645.1\_ASM201964v1\_genomic.fna\_1:3948839-3949826 Satlength=988  
Nr of Repeats=19 RepeatLength=52 seed=ACTTCGGACA Num.seqs=18  
Similarity=0.865091 86  
TTGTTTTAGAGC---AAAGCTGTCTGAACTCTGGCCT-ACTTCGGACAGCTTTAGC  
GCF\_002019645.1\_ASM201964v1\_genomic.fna\_1:4298062-4299581 Satlength=1520  
Nr of Repeats=20 RepeatLength=52 seed=CTCTCTTCGG Num.seqs=18  
Similarity=0.844469 136  
-TCTTTCAG-GCTTCAAAGCTGTCTGAAC-CTGGACTCTCTTCGGACAGCTTTGGC

\*\*\*\*\* \*\* \* \*\*\* \*\* \*\*        \*\*\*\*\* \*\*\*\* \*\*

Consensus:

aCTTCGGACAGCTTTaGctTcTTTcAGaGcttcAAAGCTGTCTGAACTCTGGaCTc

>Bacillus\_Fam\_409\_56\_2 Nr. of seq. 2 Alignment length(with gaps) = 56  
Alignment score = 0.625000  
GCF\_900104555.1\_IMG-  
taxon\_2651870172\_annotated\_assembly\_genomic.fna\_16:18479-18947  
Satlength=469 Nr of Repeats=9 RepeatLength=52 seed=TTTGTTCAT Num.seqs=9  
Similarity=0.798567 0 TTTGTTCATAGACAG-  
CTTCTATCGGACAACTCTAT-GATNC--GCCTATCCGT  
Rev.of\_GCF\_900104555.1\_IMG-  
taxon\_2651870172\_annotated\_assembly\_genomic.fna\_25:10104-10364  
Satlength=261 Nr of Repeats=5 RepeatLength=52 seed=AATAGAGGTC Num.seqs=5  
Similarity=0.825641 24 TTTGTTCATAGA-  
AGACCTCTATTGGACAAA--CTATCGATTCAAG-CTATGTGT

\*\*\*\*\* \*\* \* \*\*\*\*\*        \*\*\*\*\* \* \* \*        \*\*

Consensus:

TTTGTTCATAGAcAGaCcTCTATcGGACAAActCTATcGATtCaaGcCTATccGT

>Bacillus\_Fam\_410\_56\_2 Nr. of seq. 2 Alignment length(with gaps) = 56  
Alignment score = 0.601190  
GCF\_000181495.1\_ASM18149v1\_genomic.fna\_164:6846-7219 Satlength=374 Nr of  
Repeats=7 RepeatLength=53 seed=TTTAGAGGTT Num.seqs=5 Similarity=0.816364  
0 TTTAGAGGTTGCCGATTGAAGGTCGTG-GAGGAATC-GAGGTAGTCAAAGAG-GCC  
GCF\_000181495.1\_ASM18149v1\_genomic.fna\_186:321552-322293 Satlength=742 Nr  
of Repeats=14 RepeatLength=53 seed=GGTTGTGCGAT Num.seqs=13  
Similarity=0.775087 5  
TAT-GGGGTTGTGCGATTGGNTGT-TTGAGAGGAATCGGTGGT-GTCAAAGAGAGCC

\* \* \* \*\*\*\*\*        \*\* \*\* \*\*\*\*\* \* \*\*\* \*\*\*\*\* \*\*

Consensus:

TaTaGaGGTTGcCGATTGaagGTcgTgaGAGGAATCgGaGGTaGTCAAAGAGaGCC

>Bacillus\_Fam\_411\_55\_2 Nr. of seq. 2 Alignment length(with gaps) = 55  
 Alignment score = 0.654545  
 GCF\_000181495.1\_ASM18149v1\_genomic.fna\_57:492-700 Satlength=209 Nr of  
 Repeats=4 RepeatLength=52 seed=CTCAAGACAC Num.seqs=4 Similarity=0.743187  
 0 CTCAAGACACTTTCCTCGGC--ATTTTACCCGGTTTATGTCCTTGAGA-ACCTCC  
 Rev.of\_GCF\_000181495.1\_ASM18149v1\_genomic.fna\_186:148691-149003  
 Satlength=313 Nr of Repeats=6 RepeatLength=52 seed=TCTCAAGGAC Num.seqs=6  
 Similarity=0.745912 46  
 NTCAAGACACTTT--TGAGCTAATTTTATCCTGTTCATGTCCTTGAGACTCTTCC

\*\*\*\*\* \* \*\* \*\*\*\*\* \*\* \*\*\* \*\*\*\*\* \* \*\*

Consensus:

cTCAAGACACTTTcTcaGCTaATTTTAcCCgGTTcATGTCCTTGAGAcAcTCC

>Bacillus\_Fam\_412\_55\_2 Nr. of seq. 2 Alignment length(with gaps) = 55  
 Alignment score = 0.624242  
 GCF\_000285535.1\_ASM28553v1\_genomic.fna\_3:66531-66842 Satlength=312 Nr of  
 Repeats=6 RepeatLength=52 seed=CTTCATCAAC Num.seqs=5 Similarity=0.858974  
 0 CTTCATCAACC-CGATGAAGGACTTTCAGCGA-CACT-TCCGCTGCATTGCGA  
 GCF\_000285535.1\_ASM28553v1\_genomic.fna\_3:178754-178962 Satlength=209 Nr  
 of Repeats=4 RepeatLength=52 seed=ATGAAGGACT Num.seqs=4  
 Similarity=0.497428  
 14 CTTCATCAGCCTCGATGAAGGACTTTCC-CCTAGTAATCTAC-CTCCATTGCGA

\*\*\*\*\* \*\* \*\*\*\*\* \* \* \* \* \* \*\*\*\*\* \*\*

Consensus:

CTTCATCAaCCtCGATGAAGGACTTTCcAcCgAgcAaTcTaCgCTcCATTCGaGA

>Bacillus\_Fam\_413\_55\_2 Nr. of seq. 2 Alignment length(with gaps) = 55  
 Alignment score = 0.633333  
 GCF\_000294775.2\_ASM29477v2\_genomic.fna\_1:2273821-2274185 Satlength=365 Nr  
 of Repeats=7 RepeatLength=52 seed=CTCAAAAAAT Num.seqs=7  
 Similarity=0.943834 0  
 CTCAAAAAATGGGAGCTAATCGAAATGAATAACGACGAAAAAGAAACCTCTA--  
 Rev.of\_GCF\_000294775.2\_ASM29477v2\_genomic.fna\_1:2924329-2925107  
 Satlength=779 Nr of Repeats=15 RepeatLength=52 seed=TTTTCGTCGT  
 Num.seqs=13 Similarity=0.847469  
 41 CATAAGAAATGGTAGTTAATCGTAATGAATAACGACGAAAAAG---GCTGTGCNC

\* \*\* \*\*\*\*\* \*\* \*\*\*\*\* \*\*\*\*\* \* \* \*

Consensus:

CacAAaAAATGGgAGcTAATCGaAATGAATAACGACGAAAAAGaaacCTcTacnc

>Bacillus\_Fam\_414\_55\_2 Nr. of seq. 2 Alignment length(with gaps) = 55  
 Alignment score = 0.639394  
 GCF\_000307875.1\_BABA1.0\_genomic.fna\_114:62513-62721 Satlength=209 Nr of  
 Repeats=4 RepeatLength=52 seed=TTTTGTCTTT Num.seqs=4 Similarity=0.897436  
 0 TTTTGTCTTTAATAAGGGTCTTAAAGAC--ATTTCAGCGAAAGGAACATGCA-  
 Rev.of\_GCF\_001591665.1\_ASM159166v1\_genomic.fna\_52:7926-8342 Satlength=417  
 Nr of Repeats=8 RepeatLength=52 seed=CCCTTATTAA Num.seqs=8

Similarity=0.879155

18

TTTTGTCTTTAATAAGGGCTCTTAAAGACAAAAATGCAG-GAAA-G-CCATGGGG

\*\*\*\*\*

Consensus:

TTTTGTCTTTAATAAGGGcTCTTAAAGACaaAaaTcCAGcGAAAgGaaCATGcag

>Bacillus\_Fam\_415\_55\_2 Nr. of seq. 2 Alignment length(with gaps) = 55

Alignment score = 0.642424

GCF\_000508325.1\_BAVI\_1\_genomic.fna\_45:30780-31040 Satlength=261 Nr of Repeats=5 RepeatLength=52 seed=TTCATAAAGC Num.seqs=5 Similarity=0.851282

0 TTCATAAAGCCCG-CGCCAGAGGAAAAAAG--GTCAAAGCGGTCAATAAGAGAGG

Rev.of\_GCF\_001591805.1\_ASM159180v1\_genomic.fna\_7:179457-179715

Satlength=259 Nr of Repeats=5 RepeatLength=52 seed=GGGCTTTATG Num.seqs=3 Similarity=0.786325 12

TTCATAAAGCCCGTNGAC-GCNGAAAAAGCCGNC-CA-CGGTCAATAAGAGCGG

\*\*\*\*\*

Consensus:

TTCATAAAGCCCGtcGaCaGagGAAAAAGccGtCaaAgCGGTCAATAAGAGaGG

>Bacillus\_Fam\_416\_55\_2 Nr. of seq. 2 Alignment length(with gaps) = 55

Alignment score = 0.624242

GCF\_000621445.1\_ASM62144v1\_genomic.fna\_2:234605-234813 Satlength=209 Nr of Repeats=4 RepeatLength=52 seed=TTTGTCTAAT Num.seqs=4

Similarity=0.847737

0 TTTGTCTAATAGAGCCTTTCTATTGGACACTTTTCTCCGATT-TTGCAC-T-CGT

Rev.of\_GCF\_000813125.1\_ASM81312v1\_genomic.fna\_73:46396-46657

Satlength=262 Nr of Repeats=5 RepeatLength=52 seed=CGGGAAAGAA Num.seqs=4 Similarity=0.738470 47

TTTGTCCGATAGAGCCTTTCTATCGGACA--TTT-TCCGCTTCTTTCCCGTCCCT

\*\*\*\*\*

Consensus:

TTTGTCCaATAGAGCCTTTCTATcGGACActTTTcTCCGaTTcTTgCaCgTcCcT

>Bacillus\_Fam\_417\_55\_2 Nr. of seq. 2 Alignment length(with gaps) = 55

Alignment score = 0.636364

GCF\_000709935.2\_ASM70993v2\_genomic.fna\_1:279198-279562 Satlength=365 Nr of Repeats=7 RepeatLength=52 seed=AATTGCTCCA Num.seqs=7

Similarity=0.831387

0 AATTGCTCCAGCTGATTTATAGGGAACCATAATTG---CTTTTTGATACCCATA

Rev.of\_GCF\_000708755.2\_ASM70875v2\_genomic.fna\_2:135718-136030

Satlength=313 Nr of Repeats=6 RepeatLength=52 seed=GGGAAGCAAA Num.seqs=4 Similarity=0.736625 50

ATTTGCTCCGTCTGATTTATGAGGTACCAT-TTTGACGCTTTTGTCTTCCCTATA

\* \*\*\*\*\*

Consensus:

AaATTGCTCCagCTGATTTATaaGGaACCATAaTTGacgCTTTTTGaTaCCcATA

>Bacillus\_Fam\_418\_55\_2 Nr. of seq. 2 Alignment length(with gaps) = 55  
Alignment score = 0.624242  
GCF\_000986785.1\_ASM98678v1\_genomic.fna\_1:69648-69960 Satlength=313 Nr of  
Repeats=6 RepeatLength=52 seed=CCTCCATTCG Num.seqs=6 Similarity=0.831447  
0 CCTCCATTCGGA CTC-GAGACACCGCTTTC-CTC-CTCGGCCTGTCCGAATCAGA  
Rev.of\_GCF\_001591645.1\_ASM159164v1\_genomic.fna\_5:52435-52699  
Satlength=265 Nr of Repeats=5 RepeatLength=53 seed=TCGGACAGC Num.seqs=4  
Similarity=0.878407 48  
CCTTCATTCGGA CTCAGA-AGATCACTTGCTCTCGCTTTG-CTGTCCGAATCAGT

\*\*\* \*\*\*\*\* \*\* \* \* \* \*\*\* \* \*\*\* \*\* \* \*\*\*\*\*

Consensus:

CCTcCATTCGGA CTCaGaAcAcCaCTTgCtCTCgCTcgGcCTGTCCGAATCAGa

>Bacillus\_Fam\_419\_55\_2 Nr. of seq. 2 Alignment length(with gaps) = 55  
Alignment score = 0.669697  
GCF\_001420715.1\_ASM142071v1\_genomic.fna\_22:613446-613812 Satlength=367 Nr  
of Repeats=7 RepeatLength=52 seed=TTCAAAAGAC Num.seqs=5  
Similarity=0.861538 0  
TTCAAAAGACCAAGAGGAAGGAAAAATCAG--GTGCGATGGTCTTTAT-NGGGA  
Rev.of\_GCF\_001420715.1\_ASM142071v1\_genomic.fna\_22:3743530-3743790  
Satlength=261 Nr of Repeats=5 RepeatLength=52 seed=TCCTCTTGGT Num.seqs=5  
Similarity=0.866667 17 -  
TCAAAAGACCAAGAGGAAGG-AAAACCGGAAG-CGAGATGTCCTTTATAAGGGT

\*\*\*\*\* \*\*\*\*\* \*\* \* \* \* \*\*\*\*\* \*\*\*\*\* \*\*\*

Consensus:

tTCAAAAGACCAAGAGGAAGGaAAAAcCaGaaGtCGAGATGgcCTTTATaaGGGa

>Bacillus\_Fam\_420\_55\_2 Nr. of seq. 2 Alignment length(with gaps) = 55  
Alignment score = 0.627273  
GCF\_001420715.1\_ASM142071v1\_genomic.fna\_22:733261-733781 Satlength=521 Nr  
of Repeats=10 RepeatLength=52 seed=GGTAACAATA Num.seqs=10  
Similarity=0.930484 0  
GGTAACAATAGAAGGAGTATCGTGCCCGAAATCAAGCCCG-AAGAAGG-AATAT-  
Rev.of\_GCF\_001420715.1\_ASM142071v1\_genomic.fna\_22:2607422-2607686  
Satlength=265 Nr of Repeats=5 RepeatLength=52 seed=TATTGTTACC Num.seqs=3  
Similarity=0.897436 10  
GGTAACAATAGTCCAAGTATTGTGCCCGAAATCAAG--GTAAGCAGGCAAAAAC

\*\*\*\*\* \*\*\*\*\* \*\*\*\*\* \* \*\*\* \*\* \* \*

Consensus:

GGTAACAATAGaacaAGTATcGTGCCCGAAATCAAGcccGtAAGaAGGcAAaAac

>Bacillus\_Fam\_421\_55\_2 Nr. of seq. 2 Alignment length(with gaps) = 55  
Alignment score = 0.630303  
GCF\_001439915.1\_ASM143991v1\_genomic.fna\_83:102373-102576 Satlength=204 Nr  
of Repeats=4 RepeatLength=52 seed=GGTTATGAAG Num.seqs=3  
Similarity=0.794872 0  
GGTTATGAAGGAC--ATTCCGAAGAGAGAACNNCGACGAACAGTCCTTCATCGA

Rev.of\_GCF\_001636425.1\_ASM163642v1\_genomic.fna\_1:2411742-2412106  
Satlength=365 Nr of Repeats=7 RepeatLength=52 seed=ATGAAGGACT Num.seqs=7  
Similarity=0.880342 49  
GGGGATGAAGGACGAAAGGACGAGGAGAGAA--GCGA-GAAAAGTCCTTCATCGA

\*\* \*\*\*\*\* \* \*\*\* \*\*\*\*\* \*\*\* \*\* \*\*\*\*\*  
Consensus:

GGggATGAAGGACgaaAggaCGAaGAGAGAAcngCGAcGAAaAGTCCTTCATCGA

>Bacillus\_Fam\_422\_55\_2 Nr. of seq. 2 Alignment length(with gaps) = 55  
Alignment score = 0.624242  
GCF\_001439915.1\_ASM143991v1\_genomic.fna\_122:173650-173910 Satlength=261  
Nr of Repeats=4 RepeatLength=52 seed=TTTCGGACTC Num.seqs=3  
Similarity=0.811966 0  
TTTCGGACTCATCA--TTTCGAAA-TATGCTCGCGGCTGTCCGAATCAAGCGCTC  
Rev.of\_GCF\_001439915.1\_ASM143991v1\_genomic.fna\_124:121562-121979  
Satlength=418 Nr of Repeats=8 RepeatLength=52 seed=CCTTGATTTCG Num.seqs=7  
Similarity=0.800977 48  
TTTCGGACTCAACAGGCTAAAAAGTATGCACTC--TGTCCGAATCAAGGGCTC

\*\*\*\*\* \*\* \* \*\*\* \*\*\*\*\* \* \* \*\*\*\*\*  
Consensus:

TTTCGGACTCAaCAggcTaaaAAAgTATGCaCgCggcTGTCCGAATCAAGcGCTC

>Bacillus\_Fam\_423\_55\_2 Nr. of seq. 2 Alignment length(with gaps) = 55  
Alignment score = 0.651515  
GCF\_001591945.1\_ASM159194v1\_genomic.fna\_9:103168-103374 Satlength=207 Nr  
of Repeats=4 RepeatLength=52 seed=TTTGTCTTTT Num.seqs=3  
Similarity=0.880342  
0 TTTGTCTTTTAGCACGCT-TCTCTCGGACATCTTCTCCCT-TTTCTTCCCCAC-  
GCF\_001591945.1\_ASM159194v1\_genomic.fna\_9:110417-110677 Satlength=261 Nr  
of Repeats=5 RepeatLength=52 seed=TCCTTTAGAC Num.seqs=5  
Similarity=0.835897  
4 TCTGTCTTTTAG-ACGCTCTCTCTTAGACA-CTT-CTCCCTGATTCTCACCCACT

\* \*\*\*\*\* \*\*\*\*\* \*\*\*\*\* \*\* \*\*\*\*\*  
Consensus:

TcTGTCTTTTAGcACGCTcTCTCTcaGACAtCTTcCTCCCTgaTTCTcaCCCACT

>Bacillus\_Fam\_424\_55\_2 Nr. of seq. 2 Alignment length(with gaps) = 55  
Alignment score = 0.612121  
GCF\_001636315.1\_ASM163631v1\_genomic.fna\_1:1916684-1916892 Satlength=209  
Nr of Repeats=4 RepeatLength=52 seed=ACCTTTTTCa Num.seqs=4  
Similarity=0.846154 0  
ACC---TTTTTCATAGAGTTCCCTCTTTTTTCGGGCAATGCAACCCACTCTCATTT  
GCF\_001636315.1\_ASM163631v1\_genomic.fna\_1:972743-973108 Satlength=366 Nr  
of Repeats=7 RepeatLength=52 seed=CAATGCAACC Num.seqs=6  
Similarity=0.733333  
33 ACCGAAAATATCA-ATCTTTTCTCTTTTTTCGGGCAATGCAACCCCTTCCATTA

\*\*\* \* \*\*\* \* \*\* \*\*\*\*\* \*\* \*\*\*\*\*

Consensus:

ACCgaaaaTaTCAtAgagTTcCCTCTTTTTTCGGGCAATGCAACCCaCTccCATTa

>Bacillus\_Fam\_425\_55\_2 Nr. of seq. 2 Alignment length(with gaps) = 55  
Alignment score = 0.603030  
GCF\_001636315.1\_ASM163631v1\_genomic.fna\_1:2344320-2344632 Satlength=313  
Nr of Repeats=6 RepeatLength=52 seed=GATGAAGGAC Num.seqs=6  
Similarity=0.933333 0  
GATGAAGGACATTTTG-CATGGGAACCTGCTTCG-TTTGGTCTTCATC-ACGCC  
GCF\_001636425.1\_ASM163642v1\_genomic.fna\_1:2956434-2957110 Satlength=677  
Nr of Repeats=13 RepeatLength=52 seed=AAGGGCTTCA Num.seqs=13  
Similarity=0.827447 34  
-ATGAAGGACTTTTCGCCAT-GG-AACCAACCTCGATAAGGGCTTCATCGACGCC

\*\*\*\*\* \*\*\* \* \*\*\* \*\* \*\*\*\*\* \* \*\*\* \* \*\* \*\*\*\*\* \*\*\*\*\*

Consensus:

gATGAAGGACaTTTcGcCATgGGaAACCaCcTCGaTaaGGgCTTCATCgACGCC

>Bacillus\_Fam\_426\_55\_2 Nr. of seq. 2 Alignment length(with gaps) = 55  
Alignment score = 0.657576  
GCF\_001636345.1\_ASM163634v1\_genomic.fna\_1:388884-389144 Satlength=261 Nr  
of Repeats=5 RepeatLength=52 seed=GAAACAGGAC Num.seqs=5  
Similarity=0.820126  
0 GAAACAGGACANTAAACCCAGTAAGTGGAAAATAGAGAGACG-G-AAA-GAGCG  
Rev.of\_GCF\_001636345.1\_ASM163634v1\_genomic.fna\_1:2655784-2656044  
Satlength=261 Nr of Repeats=5 RepeatLength=52 seed=TTTCTCTCAT Num.seqs=5  
Similarity=0.841026 3 -  
AAACAGGACANGAAACCCAGTAACTGGTAAAT-G-GAGTCGTGTAAATGAGAG

\*\*\*\*\* \*\*\*\*\* \*\*\* \*\*\*\*\* \* \*\*\* \*\* \* \*\*\* \*\*\* \*

Consensus:

gAAACAGGACANgAAACCCAGTAActGGaAAATaGaGAGaCGtGtAAAtGAGaG

>Bacillus\_Fam\_427\_55\_2 Nr. of seq. 2 Alignment length(with gaps) = 55  
Alignment score = 0.690909  
GCF\_002019605.1\_ASM201960v1\_genomic.fna\_1:4272331-4272850 Satlength=520  
Nr of Repeats=10 RepeatLength=52 seed=AACGAGCAGG Num.seqs=9  
Similarity=0.846154 28  
GGTAACTATGAAGCGTTCATGATGCCCGAACGAGCAGGAGAAGAAA---GAAAC  
GCF\_002019605.1\_ASM201960v1\_genomic.fna\_1:4387305-4388137 Satlength=833  
Nr of Repeats=16 RepeatLength=52 seed=CGAGAGAAGA Num.seqs=16  
Similarity=0.917949 28  
GGTAACTATAGAGCGTTCATAATGCCCG--CGAG-AGAAGAAAAAATGAGAGAAC

\*\*\*\* \*\* \*\*\*\*\* \*\* \*\*\*\*\* \*\*\*\*\* \*\*\*\*\*

Consensus:

aaCGAGcAGaAGAAaAAAtgaGAaAACGGTAACTATaaAGCGTTCATaATGCCCG

>Bacillus\_Fam\_428\_55\_2 Nr. of seq. 2 Alignment length(with gaps) = 55  
Alignment score = 0.636364

\*\*\*\*\*       \*\*\*\*\*       \*\*   \*\*\*\*\*   \*\*\*\*\*       \*\*\*\*\*       \*\*\*\*\*   \*   \*\*  
Consensus:

```
>Bacillus_Fam_429_55_2 Nr. of seq. 2 Alignment length(with gaps) = 55
Alignment score = 0.660606
GCF_001315165.1_ASM131516v1_genomic.fna_30:29786-29998 Satlength=213 Nr
of Repeats=4 RepeatLength=53 seed=CCCTTATGCG Num.seqs=4
Similarity=0.882600
0      CCCTTATGC-GAGGAAATGTCATCTATAAGGGTACAATTA-AGAGCGAATCATA
GCF_001315165.1_ASM131516v1_genomic.fna_78:17736-17948 Satlength=213 Nr
of Repeats=4 RepeatLength=53 seed=AATCGTACCC Num.seqs=4
Similarity=0.878407
46     CCCTTATGCAGGGTAACCGGTC-CCTATAAGGGTACAATTAGGGAG-GAATCGTA
```

CCCTTATGCaGaGgAAaagGTCacCTATAAGGGTACAATTAgagAGGcGAATCaTA

```
>Bacillus_Fam_430_55_2 Nr. of seq. 2 Alignment length(with gaps) = 55
Alignment score = 0.660606
GCF_900109925.1_IMG-
taxon_2651870116_annotated_assembly_genomic.fna_22:99833-100097
Satlength=265 Nr of Repeats=5 RepeatLength=53 seed=ATTGGTGACC Num.seqs=4
Similarity=0.920335 1 CATTGGTGACCTTTCTTCAAC-
TTCACCCACCTAGATAGGGCACCAAT-AGCCTT
GCF_900109925.1_IMG-
taxon_2651870116_annotated_assembly_genomic.fna_22:209996-210208
Satlength=213 Nr of Repeats=4 RepeatLength=53 seed=ATTGGTGACC Num.seqs=4
Similarity=0.756173 1
CATTGGTGACCTTTCTTCTCTTTTCATCTACC-ACTTAGGGCACCAATCAACC-C
```

\*\*\*\*\* \* \*\*\*\* \* \*\*\* \* \*\*\*\*\* \* \*\* \*

Consensus:

```
>Bacillus_Fam_431_54_2  Nr. of seq. 2 Alignment length(with gaps) = 54
Alignment score = 0.669753
GCF_000171615.1_ASM17161v1_genomic.fna_74:41439-41699 Satlength=261 Nr of
Repeats=5 RepeatLength=52 seed=GCGCGGTGCA Num.seqs=5 Similarity=0.912821
0      GCGCGGTGCAGAAAAGAGGAG-AAGGAAGAGAGAACAGCCCCGCGCGAGCCG-G
Rev.of_GCF_000171615.1_ASM17161v1_genomic.fna_128:4002-4209 Satlength=208
Nr of Repeats=4 RepeatLength=52 seed=GCTCTTCTCC Num.seqs=3
```

37

\* \* \* \* \*

gCGCGGTGCagaAAAGAGGAGaAAaGAAGaGAGAAcAGCaCCGCGCGaGccGaG

Alignment score = 0.743827

0 AATGAAGACACCTCTC-CTCCTAATTTACCTCACTCACGTCTTCATACC-TCG

Satlength=417 Nr of Repeats=8 RepeatLength=52 seed=ATGTCTTCAT Num.seqs=8

ATGAAGACATCTCTCACTCC-ATTTTCACCTCACGGACGTCTTCATACCGTCT

\*\*\*\*\*      \*\*\*\*\*      \*\*\*\*\*      \*      \*\*\*\*\*      \*\*\*\*\*      \*\*\*\*\*

aATGAAGACAcCTCTCaCTCtAaTTTCACCTCACgcACGTCTTCATACCgTCg

Alignment score = 0.629630

Similarity=0.865690

Rev.of GCF 000175075.1 ASM17507v1 genomic.fna 31:202656-202864

Similarity=0.893162

GG-AAACATTGTCCTCGTAGG-GTGTCAATGAAGCCCTGAGCCGATGAAAAAGA

\*\*\*

GGtaAACATTGTCCTCGTAGGaGTGt cAATGAaGCCcTcaaCCGaTGaAAAAGa

Alignment score = 0.771605

Similarity=0.816872

GCF\_000177235.2\_ASM17723v2\_genomic.fna 1:4577046-4578346 Satlength=1301

Similarity=0.816154

TCTTACCTTCACACTATTTTATTTCGCTCAAGGGCAGATGG--GACNGCGCCA

\*\*\*\*\*      \*\*\*\*\*      \*\*      \*\*\*\*\*      \*\*\*\*\*      \*      \*\*\*

Consensus :

TCTTACCTTCACACTaTTTTTTaTTcGCTCAAGGGCAGATGGcaGACtqCqCCA



>Bacillus\_Fam\_435\_54\_2 Nr. of seq. 2 Alignment length(with gaps) = 54  
 Alignment score = 0.654321  
 GCF\_000177235.2\_ASM17723v2\_genomic.fna\_1:4033931-4034762 Satlength=832 Nr  
 of Repeats=17 RepeatLength=52 seed=TTTCCTTTCT Num.seqs=14  
 Similarity=0.882784 3  
 GGCTTTCCTTTCT-ATGCACTTTTCATCCTTAGAAAGGAATACTA-ACTCCTCT  
 GCF\_000177235.2\_ASM17723v2\_genomic.fna\_1:4080458-4081081 Satlength=624 Nr  
 of Repeats=12 RepeatLength=52 seed=AAAGGAATGC Num.seqs=11  
 Similarity=0.865734 32  
 CGCTTTCCTTTCTAACGCTCGTTTC-TCTTCAGAAAGGAATGCTAGACTCGT-T

\*\*\*\*\* \* \* \* \* \* \* \* \* \* \* \* \* \* \* \* \* \* \* \* \* \* \* \* \* \* \* \* \* \* \* \* \*  
 Consensus:

TTTCCTTTCTaAcGCaCgTTTCaTCcTcAGAAAGGAATaCTAgACTCcTcTcGC

>Bacillus\_Fam\_436\_54\_2 Nr. of seq. 2 Alignment length(with gaps) = 54  
 Alignment score = 0.617284  
 GCF\_000181495.1\_ASM18149v1\_genomic.fna\_177:12081-12289 Satlength=209 Nr  
 of Repeats=4 RepeatLength=52 seed=TTCATAAGAC Num.seqs=4  
 Similarity=0.846154  
 0 TTCAT-AAGACCAAACTAAGGTGGAAATGCAG-TTAGGGTGTCTCATGAACGC  
 Rev.of\_GCF\_000181495.1\_ASM18149v1\_genomic.fna\_156:9142-9350 Satlength=209  
 Nr of Repeats=4 RepeatLength=52 seed=TCTTTTGGC Num.seqs=4  
 Similarity=0.849057 18  
 TTCATGGAG-CCAAAAAGAGAGTGGATTTCAAGATTAGGGTGTCTCATGAAAGG

\*\*\*\*\* \* \* \* \* \* \* \* \* \* \* \* \* \* \* \* \* \* \* \* \* \* \* \* \* \* \* \* \* \* \* \* \*  
 Consensus:

TTCATgAAGaCCAAAAagAaaGTGGAaaTcaAGaTTAGGGTGTCTCATGAAaGc

>Bacillus\_Fam\_437\_54\_2 Nr. of seq. 2 Alignment length(with gaps) = 54  
 Alignment score = 0.635802  
 GCF\_000181495.1\_ASM18149v1\_genomic.fna\_177:51711-52127 Satlength=417 Nr  
 of Repeats=8 RepeatLength=52 seed=GTTAGACCT Num.seqs=8  
 Similarity=0.792677  
 0 GTTAGACCTGTGGAATTGAAGAAAAAGA-AATCGGCCGTGTAAAA-AGGTTG  
 GCF\_000181495.1\_ASM18149v1\_genomic.fna\_186:402271-402635 Satlength=365 Nr  
 of Repeats=7 RepeatLength=52 seed=AAGAGAATCG Num.seqs=7  
 Similarity=0.820305 25  
 TTTGGACCCGGTGAATCCNA-AAAGAAGAGAATCGACCGGGTTAAAGAGG-TG

\*\* \*\*\*\*\* \* \* \* \* \* \* \* \* \* \* \* \* \* \* \* \* \* \* \* \* \* \* \* \* \* \* \* \* \* \* \* \*  
 Consensus:

gTTaGACCCgGTGGAATccaAgAAAaAAGAgAATCGaCCGgGTTAAAgAGGtTG

>Bacillus\_Fam\_438\_54\_2 Nr. of seq. 2 Alignment length(with gaps) = 54  
 Alignment score = 0.635802  
 GCF\_000242895.2\_ASM24289v3\_genomic.fna\_1:1675220-1675480 Satlength=261 Nr  
 of Repeats=5 RepeatLength=52 seed=AAAAAGTGTG Num.seqs=5

|                                                          |               |
|----------------------------------------------------------|---------------|
| Similarity=0.902564                                      | 0             |
| AAAAAGTGTGGAG-CGGTAACTGAAACAAG-GAAGTAGTGACCAAAGAGGGTGG   |               |
| GCF_000242895.2_ASM24289v3_genomic.fna_1:1925605-1925915 | Satlength=311 |
| of Repeats=6 RepeatLength=52 seed=CGGTCACTAA Num.seqs=5  |               |
| Similarity=0.757862                                      | 14            |
| AAAAAGNACCCAGNCGGTCACT-AAACCAGTGAAGTAGTGACCAAAGAGAG-GA   |               |

\*\*\*\*\* \*\* \*\*\*\*\* \*\*\* \*\*\*\*\* \*\* \*\*\*\*\* \* \*

Consensus:

AAAAAGtaccAGnCGGTaACTgAAACaAGtGAAGTAGTGACCAAGAGaGtGa

```
>Bacillus_Fam_439_54_2  Nr. of seq. 2 Alignment length(with gaps) = 54
Alignment score = 0.611111
GCF_000311725.1_ASM31172v1_genomic.fna_2:554922-555286 Satlength=365 Nr
of Repeats=7 RepeatLength=52 seed=TGTC CGAATC Num.seqs=7
Similarity=0.875458
0      TGTCCGAATC-CAGCTATTATTCGGACTCCTTCTTTGTTTTTCGCTCCAC-TC
Rev.of_GCF_001439915.1_ASM143991v1_genomic.fna_116:114146-114724
Satlength=579 Nr of Repeats=10 RepeatLength=52 seed=GGTGTGATTC
Num.seqs=6 Similarity=0.815385
15     TGTCCGAATCACACCTACT-TTCAGACTCNACCTTCGCTTTTCCGC-CAACATC
```

\*\*\*\*\* \*\* \*\*\* \* \*\*\* \*\*\*\*\* \*\*\* \* \*\*\*\*\* \*\*\* \* \*\* \*\*  
Consensus:

TGTCCGAATCaCAcCTAcTaTTCaGACTCcacCTTcGcTTTTcCGCtCaACaTC

```
>Bacillus_Fam_440_54_2  Nr. of seq. 2 Alignment length(with gaps) = 54
Alignment score = 0.660494
GCF_000331575.1_ASM33157v1_genomic.fna_1:1524595-1525167 Satlength=573 Nr
of Repeats=11 RepeatLength=52 seed=TTTTCTGTCC Num.seqs=11
Similarity=0.902564 0
TTTTCTGTCCGAACTTGGCCTCAGTTCGGACTCAATTTTAGCTTTTGCTGCG--
Rev.of_GCF_000331575.1_ASM33157v1_genomic.fna_4:27225-27953 Satlength=729
Nr of Repeats=14 RepeatLength=52 seed=GACAGGAAAT Num.seqs=14
Similarity=0.915187 9
TTTCCTGTCCGAACTGGGGCTGAGTTCGGACACGA-TTtagCAGTT-CTGGGGA
```

Consensus:

TTTcCTGTCCGAACtGgGcCTcAGTTCGGACaCaAtTTTAGCagTTgCTGcGga

```
>Bacillus_Fam_441_54_2  Nr. of seq. 2 Alignment length(with gaps) = 54
Alignment score = 0.626543
GCF_000374345.1_ASM37434v1_genomic.fna_8:71233-71545 Satlength=313 Nr of
Repeats=6 RepeatLength=52 seed=AGAAAATATC Num.seqs=6 Similarity=0.796581
0      AGAAAATATCGGGCCGGAATGGCGTTCATAGGGNAAATGAAAGCTATTTTG-G-
Rev.of_GCF_000374345.1_ASM37434v1_genomic.fna_18:16790-17225
Satlength=436 Nr of Repeats=6 RepeatLength=52 seed=TGGCTTTCAT Num.seqs=4
Similarity=0.591919
AG-AAATAGCAGG-GGGAATGGCGTTCATTTGGGTGATGAAAGCCATCTTGAGA
44
```

\*\* \*\*\*\*\* \* \*\* \*\*\*\*\* \*\*\*\*\* \*\* \*\*\*\*\* \*\* \*\*\* \*

Consensus:

AGaAAATAgCaGGccGGAATGGCGTTCATagGGgaaATGAAAGCcATcTTGaGa

>Bacillus\_Fam\_442\_54\_2 Nr. of seq. 2 Alignment length(with gaps) = 54  
Alignment score = 0.617284  
GCF\_000374345.1\_ASM37434v1\_genomic.fna\_16:99-567 Satlength=469 Nr of  
Repeats=9 RepeatLength=52 seed=GCGTTCATCC Num.seqs=9 Similarity=0.717680  
0 GCGTTCATCCCGCTNATGAACGTCATTACAANTCAANTTTTGCA-CC-GGGATG  
Rev.of\_GCF\_000374345.1\_ASM37434v1\_genomic.fna\_74:7594-7802 Satlength=209  
Nr of Repeats=4 RepeatLength=52 seed=GGGGATGAAC Num.seqs=4  
Similarity=0.790598 12  
GCGTTCATCCCCCTTATGAACGCCATCTC-GTTCAA-TTTTCCATCCTGTGATA

\*\*\*\*\* \*\* \*\*\*\*\* \*\*\* \* \*\*\*\* \*\*\*\*\* \*\* \*\* \* \*\*\*

Consensus:

GCGTTCATCCCCCTtATGAACGcCATcaCaatTCAAnTTTTcCATCctGgGATa

>Bacillus\_Fam\_443\_54\_2 Nr. of seq. 2 Alignment length(with gaps) = 54  
Alignment score = 0.641975  
GCF\_000401235.1\_BacNeaAAU1\_genomic.fna\_108:2225-2531 Satlength=307 Nr of  
Repeats=4 RepeatLength=52 seed=AGGTAACAGAG Num.seqs=3 Similarity=0.775681  
0 AGGTAACAGAGAGAACTGCTCAGTGACCGT-TGCA-GCAAAGGAAAGGAGGAAA  
GCF\_000401235.1\_BacNeaAAU1\_genomic.fna\_276:14688-14894 Satlength=207 Nr  
of Repeats=4 RepeatLength=52 seed=GAAAAACAAA Num.seqs=3  
Similarity=0.914530  
36 AGGTAACAGAGAGGGCTCCTCAGTGCCCGTAAGCACGAAAAACAAA--AGCAAA

\*\*\*\*\* \*\* \*\*\*\*\* \*\*\*\*\* \*\*\* \* \*\*\* \*\*\* \*\* \*\*\*

Consensus:

AGGTAACAGAGAGaAcTcCTCAGTGaCCGTaaGCACGaAAAacAAAggAGcAAA

>Bacillus\_Fam\_444\_54\_2 Nr. of seq. 2 Alignment length(with gaps) = 54  
Alignment score = 0.654321  
GCF\_000430765.1\_ASM43076v1\_genomic.fna\_6:269287-269548 Satlength=262 Nr  
of Repeats=5 RepeatLength=52 seed=CACTTCGGAC Num.seqs=4  
Similarity=0.871795  
0 CACTTCGGACAGATTGCGGACCCTGGT--CTCAAAAGCTGTCCGAACTCAGATC  
GCF\_002019645.1\_ASM201964v1\_genomic.fna\_1:4520185-4521327 Satlength=1143  
Nr of Repeats=22 RepeatLength=52 seed=GTTCGGACAG Num.seqs=20  
Similarity=0.812551 2  
AAGTTCGGACAGCTT--GGACCCCAATAGATCAAAAGCTGTCCGAACTCAGAGC

\* \*\*\*\*\* \*\* \*\*\*\*\* \* \*\*\*\*\* \*\*\*\*\* \*\*\*\*\* \*

Consensus:

aAcTTCGGACAGaTTgcGGACCCcaaTagaTCAAAAGCTGTCCGAaCTCAGAgC

>Bacillus\_Fam\_445\_54\_2 Nr. of seq. 2 Alignment length(with gaps) = 54  
Alignment score = 0.694444

GCF\_000508325.1\_BAVI\_1\_genomic.fna\_12:41249-41457 Satlength=209 Nr of Repeats=4 RepeatLength=52 seed=AAAAAAGAAG Num.seqs=4 Similarity=0.910256  
0 AAAAAAGAAGGAGACGGGCACTGTGGAG-GGTTTCAGAGTGCCCGTGGGAGCTG-  
Rev.of\_GCF\_001591805.1\_ASM159180v1\_genomic.fna\_10:78357-78669  
Satlength=313 Nr of Repeats=6 RepeatLength=52 seed=TTACACGGGCA Num.seqs=6  
Similarity=0.852991 47  
AAAAAGCGGGAGTCGGTCACT-TAGAGAGGTTTCATAGTGCCCGT-GAAGCTGA

\*\*\*\*\* \* \* \* \* \* \* \* \* \* \* \* \* \* \* \* \* \* \* \* \* \*

Consensus:

AAAAAAGaaGGAGaCGGgCACTgTaGAGaGGTTCAgAGTGCCCGTgGaAGCTGa

>Bacillus\_Fam\_446\_54\_2 Nr. of seq. 2 Alignment length(with gaps) = 54  
Alignment score = 0.604938  
GCF\_000708755.2\_ASM70875v2\_genomic.fna\_7:27921-28441 Satlength=521 Nr of Repeats=9 RepeatLength=52 seed=TTGACCCTTC Num.seqs=8 Similarity=0.814103  
0 TTGACCCTTCAGCTCTNT--TGGTTTGCTCTGAAGAGTCATATGCNATCCTGTT  
GCF\_000709935.2\_ASM70993v2\_genomic.fna\_4:144384-144644 Satlength=261 Nr of Repeats=5 RepeatLength=52 seed=GAAGGGTCAT Num.seqs=5  
Similarity=0.730818  
29 TAGACCCTTCAGAT-TATGCTGGTCT-CCGTGAAGGGTCATATGTGCTCCCGTT

\* \* \* \* \* \* \* \* \* \* \* \* \* \* \* \* \* \* \* \* \*

Consensus:

TaGACCCTTCAGaTcTaTgcTGGTcTgCccTGAAGaGTCATATGcgaTCCcGTT

>Bacillus\_Fam\_447\_54\_2 Nr. of seq. 2 Alignment length(with gaps) = 54  
Alignment score = 0.629630  
GCF\_000752395.1\_Bacillus\_andreraoultii\_genomic.fna\_41:274960-275582  
Satlength=623 Nr of Repeats=12 RepeatLength=52 seed=GTCTATGAGC  
Num.seqs=11 Similarity=0.849285 0  
GTCTATGAGCCCCGAAAA-AGCAGAAACCCCGTAAAAAGCGGTTC-ATAGAAATG  
GCF\_000752395.1\_Bacillus\_andreraoultii\_genomic.fna\_43:179773-180164  
Satlength=392 Nr of Repeats=8 RepeatLength=52 seed=CGTCTATGAA Num.seqs=7  
Similarity=0.941392 51  
GTCTATGAACCCAAAAATAAC-GAAATTCCGCAAAAA-CGGTCCTATAGAACTC

\*\*\*\*\* \* \* \* \* \* \* \* \* \* \* \* \* \* \* \* \* \* \* \* \* \*

Consensus:

GTCTATGAaCCCaAAAAAtAaCaGAAAccCCGcAAAAAgCGGTcCtATAGAAaTc

>Bacillus\_Fam\_448\_54\_2 Nr. of seq. 2 Alignment length(with gaps) = 54  
Alignment score = 0.620370  
GCF\_000759675.1\_ASM75967v1\_genomic.fna\_159:74142-74454 Satlength=313 Nr of Repeats=6 RepeatLength=52 seed=TTTGGTTCCC Num.seqs=6  
Similarity=0.748971  
0 TTTGGTTCCCTT-TATCGTTGAAAAGGTGAGTTCTTGGGAATCAAAAGAGAGT-  
GCF\_000759675.1\_ASM75967v1\_genomic.fna\_170:98-669 Satlength=572 Nr of Repeats=11 RepeatLength=52 seed=AGGGGAATCAA Num.seqs=10  
Similarity=0.895157  
34 TTGGGTTCCCTTCAAAGGGAAAAAGCTGAGTT-GAGGGGAATCAAAAG-GAGTC

\*\* \*\*\*\*\* \* \* \*\*\*\*\* \*\*\*\*\* \*\*\*\*\* \*\*\*\*\*

Consensus:

TTgGGTTCCTTcaAacGgaaAAAAGcTGAGTTcgaGGGAATCAAAAGaGAGTc

>Bacillus\_Fam\_449\_54\_2 Nr. of seq. 2 Alignment length(with gaps) = 54

Alignment score = 0.654321

GCF\_000787375.1\_ASM78737v1\_genomic.fna\_2:246377-246585 Satlength=209 Nr

of Repeats=4 RepeatLength=52 seed=TACTCTTCTC Num.seqs=4

Similarity=0.884615

0 TACTCTTCTCTCAATCTCT-TTTTCGGGCGACCATCCTTCC-CTTTGACTACCG

GCF\_000787375.1\_ASM78737v1\_genomic.fna\_76:11-375 Satlength=365 Nr of

Repeats=7 RepeatLength=52 seed=CTACCGTAAT Num.seqs=7 Similarity=0.860806

46 TAATCCTCT-TCAGGCTCTCTTTTCGGG-TTCCAACCTCCTCTTTGGCTACCG

\*\* \*\* \*\*\* \*\* \*\*\*\*\* \*\*\*\*\* \*\*\*\*\* \*\*\*\*\*

Consensus:

TAATCcTCTcTCAagCTCTcTTTTCGGGcgaCCAaCCTTCctCTTTGaCTACCG

>Bacillus\_Fam\_450\_54\_2 Nr. of seq. 2 Alignment length(with gaps) = 54

Alignment score = 0.654321

GCF\_000813125.1\_ASM81312v1\_genomic.fna\_8:49357-49722 Satlength=366 Nr of

Repeats=7 RepeatLength=52 seed=GGGGGACTTC Num.seqs=6 Similarity=0.875214

0 GGGGGACTTCGGACAAATT-CTG-CTCTTCCATCAGCTGTTTGTCCGAACCTG

Rev.of\_GCF\_000813125.1\_ASM81312v1\_genomic.fna\_57:52500-52812

Satlength=313 Nr of Repeats=6 RepeatLength=52 seed=GTTCGGACAA Num.seqs=4

Similarity=0.668724

49

GGGTGACTTCGGACAAATTGAAGCCTC-TCCGGC-GATTCTTTGTCCGAACCTG

\*\*\* \*\*\*\*\* \* \*\*\* \*\* \* \*\*\*\*\*

Consensus:

GGGgGACTTCGGACAAATTgaaGcCTcTCCagCaGaTgcTTTGTCCGAACCTG

>Bacillus\_Fam\_451\_54\_2 Nr. of seq. 2 Alignment length(with gaps) = 54

Alignment score = 0.669753

GCF\_000813125.1\_ASM81312v1\_genomic.fna\_12:28-289 Satlength=262 Nr of

Repeats=5 RepeatLength=52 seed=TGGAAATGTC Num.seqs=4 Similarity=0.846154

0 TGGAAATGTCTGAAGTAGCCCCAGGTTTCGGCCAAAACAAC--CACTGGGATCGC

Rev.of\_GCF\_000813125.1\_ASM81312v1\_genomic.fna\_141:38715-39390

Satlength=676 Nr of Repeats=11 RepeatLength=52 seed=ACTTCAGACA

Num.seqs=8 Similarity=0.728938

15 -GGAAATGTCTGAAGTAGCCNCAGGTTTCAGCCAAAATACCGTCA-TAGNCACGA

\*\*\*\*\* \*\*\*\*\* \*\*\*\*\* \* \* \*\* \* \*

Consensus:

tGGAAATGTCTGAAGTAGCCcCAGGTTCaGCCAAAaAaCgtCAcTaGgaaCGa

>Bacillus\_Fam\_452\_54\_2 Nr. of seq. 2 Alignment length(with gaps) = 54

Alignment score = 0.611111

GCF\_000934845.1\_ASM93484v1\_genomic.fna\_40:14255-14619 Satlength=365 Nr of Repeats=7 RepeatLength=52 seed=AAACACCAGT Num.seqs=7 Similarity=0.798443  
0 AAACACCAGTAACT-GGGAAAACAGTACACCAATAAGCCG-ATTGGAGCACTA  
Rev.of\_GCF\_000934845.1\_ASM93484v1\_genomic.fna\_37:21000-21475  
Satlength=476 Nr of Repeats=9 RepeatLength=53 seed=GCACCAATAC Num.seqs=7  
Similarity=0.824221 49  
AAAAACCAGAAATTAGGNAATNAGGTCACCAAT-GAGCCGTATTGGTGCNCGA

\*\*\* \*\*\*\*\* \*\* \* \*\* \*\* \* \*\*\*\*\* \*\*\*\*\* \*\*\*\*\* \*\* \* \*  
Consensus:

AAAaACCAGaAAcTaGGgAAAacAGgaCACCAATaaAGCCGtATTGGaGCaCgA

>Bacillus\_Fam\_453\_54\_2 Nr. of seq. 2 Alignment length(with gaps) = 54  
Alignment score = 0.648148  
GCF\_000986785.1\_ASM98678v1\_genomic.fna\_2:121115-121636 Satlength=522 Nr of Repeats=10 RepeatLength=52 seed=ATCAGTGACC Num.seqs=9  
Similarity=0.800570  
0 ATCAGTGACC--TTTTCGGAGCTGGCCTGCTCATTTTGGGCACTGACAGCCTCT  
Rev.of\_GCF\_000986785.1\_ASM98678v1\_genomic.fna\_22:27488-27748  
Satlength=261 Nr of Repeats=5 RepeatLength=52 seed=TGTCAGTACC Num.seqs=5  
Similarity=0.830818 46  
CTCAG-GACCACTTTTTGGAG-GGGNCGGCTCATTTTGGGTACTGACAGCGCAT

\*\*\*\* \*\*\*\*\* \*\*\*\*\* \*\*\*\*\* \*\* \* \*\*\*\*\* \*\*\*\*\* \*\*\*\*\* \*  
Consensus:

aTCAGtGACCacTTTTcGGAGcgGGcCgGCTCATTTTGGGcACTGACAGCccaT

>Bacillus\_Fam\_454\_54\_2 Nr. of seq. 2 Alignment length(with gaps) = 54  
Alignment score = 0.663580  
GCF\_000986785.1\_ASM98678v1\_genomic.fna\_5:231430-232157 Satlength=728 Nr of Repeats=14 RepeatLength=52 seed=TGTCAGTGCC Num.seqs=13  
Similarity=0.751820 0  
TGTCAGTGCCGTGTTTTTGTNGTGAGGA-NGTTTTTGGGTACTGAGGNGAGT-  
Rev.of\_GCF\_000986785.1\_ASM98678v1\_genomic.fna\_33:21710-22022  
Satlength=313 Nr of Repeats=6 RepeatLength=52 seed=GGCACTGACA Num.seqs=6  
Similarity=0.745912 10  
TGTCAGTGCCCGTTTTTTCGAG-GGGGAGCGAGTTTTTGGGTACTGAGGGG-GTC

\*\*\*\*\* \*\*\*\*\* \* \* \*\*\* \* \*\*\*\*\* \*\*\*\*\* \* \*\*  
Consensus:

TGTCAGTGCCcGTTTTTTCgaGtGaGGAgcGagTTTTGGGTACTGAGGgGaGTc

>Bacillus\_Fam\_455\_54\_2 Nr. of seq. 2 Alignment length(with gaps) = 54  
Alignment score = 0.617284  
GCF\_001315085.1\_ASM131508v1\_genomic.fna\_43:21365-21625 Satlength=261 Nr of Repeats=5 RepeatLength=52 seed=AACCAAAAGA Num.seqs=5  
Similarity=0.794872  
0 AACCAAAA-GAACGTGTG-GAGCAGAGGAAAAAGGTCATCATAAGGTCGATGAG  
GCF\_001315085.1\_ASM131508v1\_genomic.fna\_73:11538-11746 Satlength=209 Nr of Repeats=4 RepeatLength=52 seed=AAACCAAGCT Num.seqs=4

Similarity=0.801363

5 GCCCAAAACCAAGCTGAGCGAGCACA--AAAAAGGTCATCATAAAGCCGATGAA

\*\*\*\*\* \*\* \* \*\*\*\*\* \* \*\*\*\*\* \* \*\*\*\*\*

Consensus:

aaCCAAAAccAAcCTGaGcGAGCAcAggAAAAAGGTCATCATAAaGcCGATGAa

>Bacillus\_Fam\_456\_54\_2 Nr. of seq. 2 Alignment length(with gaps) = 54

Alignment score = 0.604938

GCF\_001420595.1\_ASM142059v1\_genomic.fna\_11:518620-519088 Satlength=469 Nr

of Repeats=9 RepeatLength=52 seed=GGTAACCAAA Num.seqs=9

Similarity=0.764245

0

GGTAACCAAAAGGNAAGCAT-TGGTGCCCGTAAACGAGGAAAAATAG-CGTTCCAC

Rev.of GCF\_001591445.1\_ASM159144v1\_genomic.fna\_2:21009-21217

Satlength=209 Nr of Repeats=4 RepeatLength=52 seed=TCACGGGCAT Num.seqs=4

Similarity=0.816239

31

GGTAACCATAGG-AAGCGTATGATGCCCGTGAAGGTTGAAAA-AGTGGATCAAC

\*\*\*\*\* \*\*\* \*\*\*\*\* \* \*\* \*\*\*\*\* \*\* \* \*\*\*\*\* \*\* \* \*\* \*

Consensus:

GGTAACCAaAGGnAAGCaTaTGaTGCCCGTaAAcGagGAAAAAtAGtcGaTCaAC

>Bacillus\_Fam\_457\_54\_2 Nr. of seq. 2 Alignment length(with gaps) = 54

Alignment score = 0.632716

GCF\_001420595.1\_ASM142059v1\_genomic.fna\_11:2718654-2718914 Satlength=261

Nr of Repeats=5 RepeatLength=52 seed=TCTTGTTACC Num.seqs=5

Similarity=0.912821

0

TCTTGTTACCGTGAACCTCACT-TTTTCTGCTTTCAGGGGTACATGACACA-CAC

GCF\_001420595.1\_ASM142059v1\_genomic.fna\_11:4652534-4652852 Satlength=319

Nr of Repeats=6 RepeatLength=53 seed=TCTTGTTACC Num.seqs=6

Similarity=0.902725

0

TCTTGTTACCGCGAACACTCTCTTTTCTACTTTCTTGGGCACATGTGGCATCT-

\*\*\*\*\* \*\*\*\*\* \* \*\* \*\*\*\*\* \*\*\*\*\* \*\*\* \*\*\*\*\* \*\* \*

Consensus:

TCTTGTTACCGcGAACaCaCTcTTTTCTaCTTTCagGGGcACATGacaCAcCac

>Bacillus\_Fam\_458\_54\_2 Nr. of seq. 2 Alignment length(with gaps) = 54

Alignment score = 0.635802

GCF\_001420715.1\_ASM142071v1\_genomic.fna\_22:875387-875647 Satlength=261 Nr

of Repeats=5 RepeatLength=52 seed=TGTCCTTCAT Num.seqs=5

Similarity=0.546667

0

TGTCCTTCATAG-TGNTAATGAAGGACAAGTTNGAAGGAAA-AATAAGTACAGA

GCF\_001420715.1\_ASM142071v1\_genomic.fna\_22:1038345-1038761 Satlength=417

Nr of Repeats=8 RepeatLength=52 seed=ATGAAGGACA Num.seqs=8

Similarity=0.602293

18

TGTCCTTCATAGACGgTNATGAAGGACAAATTCGNAAAAAAGAATAGGCAANGC

\*\*\*\*\* \* \* \*\*\*\*\* \*\* \* \* \*\*\* \*\*\*\*\* \* \* \*

Consensus:

TGTCCTTCATAGacGgTaATGAAGGACAAaTTcGaAaaAAAgAATAaGcAaaGa

>Bacillus\_Fam\_459\_54\_2 Nr. of seq. 2 Alignment length(with gaps) = 54  
Alignment score = 0.722222  
GCF\_001591445.1\_ASM159144v1\_genomic.fna\_1:86829-87037 Satlength=209 Nr of  
Repeats=4 RepeatLength=52 seed=CTCTATGTTA Num.seqs=4 Similarity=0.846154  
0 CTCTATGTTACCGTCAACCGCTTTTTTCTT-GCTCCACGGTCACTTA-AAGCCT  
GCF\_001591445.1\_ASM159144v1\_genomic.fna\_74:6946-7154 Satlength=209 Nr of  
Repeats=4 RepeatLength=52 seed=TATGTTACCG Num.seqs=4 Similarity=0.615421  
3 CTTTATGTTACCGTACACTTC-TTTTTCTTCNCTGCACGGTCACTTAGAAGCCT

\*\* \*\*\*\*\* \*\* \* \*\*\*\*\* \*\* \*\*\*\*\* \*\*\*\*\*  
Consensus:

CTcTATGTTACCGTaaACcgCtTTTTTCTTcgCTcCACGGTCACTTAgaAAGCCT

>Bacillus\_Fam\_460\_54\_2 Nr. of seq. 2 Alignment length(with gaps) = 54  
Alignment score = 0.608025  
GCF\_001591485.1\_ASM159148v1\_genomic.fna\_6:19015-20109 Satlength=1095 Nr  
of Repeats=20 RepeatLength=52 seed=TGTCCTTCAT Num.seqs=12  
Similarity=0.790210 0  
TGTCCTTCATTCCTGATGAAGGACATTTTTCTCACGA--CACAACCATGGTA  
Rev.of\_GCF\_001636315.1\_ASM163631v1\_genomic.fna\_1:3151872-3152287  
Satlength=416 Nr of Repeats=8 RepeatLength=52 seed=AAATGGTCTT Num.seqs=7  
Similarity=0.843712 29 -  
GGCCTTCATTCGCTTATGAA-GACCATTTTCACTCGAGCCACAACCTTTTTT

\* \*\*\*\*\* \*\* \*\*\*\*\* \*\* \*\*\*\*\* \* \*\*\* \*\*\*\*\* \* \*  
Consensus:

tGgCCTTCATTCCaCTgATGAAGGACaaTTTTCaCaCGAgcCACAACCaTggTa

>Bacillus\_Fam\_461\_54\_2 Nr. of seq. 2 Alignment length(with gaps) = 54  
Alignment score = 0.617284  
GCF\_001591585.1\_ASM159158v1\_genomic.fna\_16:64946-65206 Satlength=261 Nr  
of Repeats=5 RepeatLength=52 seed=TCTCTCACTT Num.seqs=5  
Similarity=0.948718  
16 CCA-CTTTTTCCTTTCCT-CTCTCACTTTTCGGCTTTCATCAANCTCCTGTACA  
GCF\_001591585.1\_ASM159158v1\_genomic.fna\_21:8882-9244 Satlength=363 Nr of  
Repeats=7 RepeatLength=52 seed=GCTCTCCTTT Num.seqs=5 Similarity=0.892308  
17 CCATCTTTCT-CTTCCCTGCTCTC-TTTTTGGTTTTCATCANC GTTATGAACA

\* \*\*\*\*\* \*\* \*\*\*\*\* \* \*\* \*\*\*\*\* \*\*\*\*\* \* \*\*\* \*\*  
Consensus:

TgCTCTCaCTTTTcGGcTTTCATCAaccTcaTGaACACCAcCTTTcTcCTTcCC

>Bacillus\_Fam\_462\_54\_2 Nr. of seq. 2 Alignment length(with gaps) = 54  
Alignment score = 0.608025  
GCF\_001591645.1\_ASM159164v1\_genomic.fna\_1:794104-794312 Satlength=209 Nr  
of Repeats=4 RepeatLength=52 seed=AACGTTCTTC Num.seqs=4  
Similarity=0.830713  
0 AACGTTCTTCATCCGGCTTATGAAAGACGTTACGGAGCGATTTACTTGA--GCA



GCF\_001591645.1\_ASM159164v1\_genomic.fna\_4:234973-235232 Satlength=260 Nr  
of Repeats=5 RepeatLength=52 seed=TGATTGAAAC Num.seqs=4  
Similarity=0.718254  
44 -ACGTTCTTCATCAGGAGGATGAAAGACGTTAGGGTGTGA-ATAAATGATTGAA

\*\*\*\*\* \*\* \*\*\*\*\* \*\* \* \*\* \*\* \*\*\* \* \*  
Consensus:

aACGTTCTTCATCaGGaggATGAAAGACGTTAcGGaGcGAtaTAaaTGAttGaA

>Bacillus\_Fam\_463\_54\_2 Nr. of seq. 2 Alignment length(with gaps) = 54  
Alignment score = 0.709877  
GCF\_001591665.1\_ASM159166v1\_genomic.fna\_35:21709-21917 Satlength=209 Nr  
of Repeats=4 RepeatLength=52 seed=ATCGAAGTAG Num.seqs=4  
Similarity=0.807692  
0 ATCGAAGTAGACAG-ATTCTACTTCAACTTTCTAG-TCTAAAATCCAGGGAAAC  
Rev.of\_GCF\_001591665.1\_ASM159166v1\_genomic.fna\_68:10391-10651  
Satlength=261 Nr of Repeats=5 RepeatLength=52 seed=CTTCTACTTC Num.seqs=5  
Similarity=0.828205 13  
GTCGAAGTAGA-AGTGCTCTACTTCAACATTCANGCTC-AAAATCCAGGGAAAC

\*\*\*\*\* \*\* \*\*\*\*\* \*\*\* \* \*\* \*\*\*\*\*  
Consensus:

aTCGAAGTAGAcAGtacTCTACTTCAACaTTCaaGcTcTAAAAATCCAGGGAAAC

>Bacillus\_Fam\_464\_54\_2 Nr. of seq. 2 Alignment length(with gaps) = 54  
Alignment score = 0.682099  
GCF\_001591805.1\_ASM159180v1\_genomic.fna\_10:65143-65350 Satlength=208 Nr  
of Repeats=4 RepeatLength=52 seed=TTTTTCCGG Num.seqs=3  
Similarity=0.948718  
49 TTTCCGGGCGACGGGCACTATGAACCTCTTATAGTGCCCATGAACG-CTC-TTT  
Rev.of\_GCF\_001591805.1\_ASM159180v1\_genomic.fna\_16:206404-206612  
Satlength=209 Nr of Repeats=4 RepeatLength=52 seed=AGGTTCATAG Num.seqs=4  
Similarity=0.897436 79  
TTTCCTGTCCGCGGCACTATGAACCTTTTATAGTGCCC--GTTCGTGTCTTTT

\*\*\*\*\* \* \* \*\*\*\*\* \*\*\*\*\* \* \*\* \*\*  
Consensus:

TTTTTTCCgGgCcaCGGGCACTATGAACCTcTTATAGTGCCCatGaaCGtcTcT

>Bacillus\_Fam\_465\_54\_2 Nr. of seq. 2 Alignment length(with gaps) = 54  
Alignment score = 0.604938  
GCF\_001636315.1\_ASM163631v1\_genomic.fna\_1:2650478-2651310 Satlength=833  
Nr of Repeats=16 RepeatLength=52 seed=TGCTGTCTGA Num.seqs=14  
Similarity=0.845590 30  
AGTATAGAGAGCAAGTAGAAAGGCGCTAGGTGCTGTCTGAAAAG--GAAAATTG  
GCF\_001636315.1\_ASM163631v1\_genomic.fna\_1:3094934-3095142 Satlength=209  
Nr of Repeats=4 RepeatLength=52 seed=CAAGTAGAAG Num.seqs=4  
Similarity=0.863248 63  
AATTTAGAGATCAAGTAGAAGCCCTCTAGCTGCTGTCT--AAAGTCAAAAATCC

\*\*\*\*\* \*\*\*\* \*\*\*\*\* \* \* \*\*\*\*\* \*\*\*\*\* \* \*\*\*\*

Consensus:

TGCTGTCTgaAAAGtcaAAAATccAaTaTAGAGAgCAAGTAGAAaccCgCTAGc

>Bacillus\_Fam\_466\_54\_2 Nr. of seq. 2 Alignment length(with gaps) = 54  
Alignment score = 0.703704  
GCF\_001636315.1\_ASM163631v1\_genomic.fna\_1:3142771-3143187 Satlength=417  
Nr of Repeats=8 RepeatLength=52 seed=CTATAGGCGA Num.seqs=8  
Similarity=0.869963 0  
CTATAGGCGACCGAGAG-GCGAGAAAAAAGTGAGGA-GGGTAGCGTATAAGGA  
GCF\_001636315.1\_ASM163631v1\_genomic.fna\_1:3843104-3843416 Satlength=313  
Nr of Repeats=6 RepeatLength=52 seed=TAGGCGACCG Num.seqs=6  
Similarity=0.844864 3  
TTATAGGCGACCGAGAGAGCG-G-AAAAAAGAGATTACGGGTAGCGTAGAAGGG

\*\*\*\*\* \* \* \* \* \* \* \* \* \* \* \* \* \* \* \* \* \* \*

Consensus:

cTATAGGCGACCGAGAGaGCGaGaAAAAAAGaGAggAcGGGTAGCGTAgAAGGa

>Bacillus\_Fam\_467\_54\_2 Nr. of seq. 2 Alignment length(with gaps) = 54  
Alignment score = 0.697531  
GCF\_001636315.1\_ASM163631v1\_genomic.fna\_1:3535170-3535534 Satlength=365  
Nr of Repeats=7 RepeatLength=52 seed=GTGTGAATTT Num.seqs=7  
Similarity=0.894994 17  
CCATTGGAAACACTTTGGTTGTAATTTT--CTAGAGTATTGTCTCGGCAATAGCCG  
GCF\_001636315.1\_ASM163631v1\_genomic.fna\_1:3851718-3851925 Satlength=208  
Nr of Repeats=4 RepeatLength=52 seed=CTATTGGAAA Num.seqs=3  
Similarity=0.897436 52  
CTATTGGAAACACTTTG--TCCAATTTTAACTCAAGTATTGTCTGCCAATACCGG

\* \* \* \* \* \* \* \* \* \* \* \* \* \* \* \* \* \* \* \* \* \* \* \*

Consensus:

gtTccAATTTTaaCTaaAGTATTGTCTGcCAATAcCcGcCATTGGAAACACTTTG

>Bacillus\_Fam\_468\_54\_2 Nr. of seq. 2 Alignment length(with gaps) = 54  
Alignment score = 0.611111  
GCF\_001636325.1\_ASM163632v1\_genomic.fna\_1:372049-372413 Satlength=365 Nr  
of Repeats=7 RepeatLength=52 seed=ATCGCCCGTT Num.seqs=7  
Similarity=0.791255  
0 ATCGCCCGTTCTGCTGCGNAAAGNTCCA-CAGAAGGTAGAAGAGAAGCGT-CCTC  
Rev.of\_GCF\_001636325.1\_ASM163632v1\_genomic.fna\_1:2619668-2620033  
Satlength=366 Nr of Repeats=7 RepeatLength=52 seed=TTGACCTTC Num.seqs=6  
Similarity=0.852991 39  
ATCGCCCGTTCTGCTGCTCAAAG-TATAGCAGAAGGTGAATAGAAG-GTGTCTC

\*\*\*\*\* \* \* \* \* \* \* \* \* \* \* \* \* \* \* \* \* \* \*

Consensus:

ATCGCCCGTTCTGccGcccAAAGnTacAgCAGAAGGTaGAAGAGAAGcGTgcCTC

>Bacillus\_Fam\_469\_54\_2 Nr. of seq. 2 Alignment length(with gaps) = 54  
Alignment score = 0.623457

GCF\_001636335.1\_ASM163633v1\_genomic.fna\_1:484026-484390 Satlength=365 Nr  
of Repeats=7 RepeatLength=52 seed=AAAGTCCATC Num.seqs=7  
Similarity=0.904762  
0 AAAGTCCATCATAGCGTTGATGATGGACAAAACGCGGTGTGAAAGC--AAATGC  
Rev.of\_GCF\_001636335.1\_ASM163633v1\_genomic.fna\_1:2460494-2460702  
Satlength=209 Nr of Repeats=4 RepeatLength=52 seed=CTTTTTCGT Num.seqs=4  
Similarity=0.974359 2  
AGAGTCCGTCATCAAGGTGATGATGGACAAAACGTGGTCAGAAAACGGAAAA--

AaAGTCCaTCATaaaGgTGATGATGGACAAAACGcGGTcaGAAAaCggAAAagc

\*\*\*\*\* \* \* \*\*\*\*\* \*\*\*\*\* \*\*\*\*\* \*\*\*\*\*  
Consensus:

```
>Bacillus_Fam_471_54_2 Nr. of seq. 2 Alignment length(with gaps) = 54
Alignment score = 0.604938
GCF_900104555.1_IMG-
taxon_2651870172_annotated_assembly_genomic.fna_19:74323-74582
Satlength=260 Nr of Repeats=5 RepeatLength=52 seed=GTTTTGTCTA Num.seqs=4
Similarity=0.846154 0 GTTTTGTCTAATAGGAGCGC-
T-CTATCGGACAACTAAGCTCTCTGGCCTCCT
GCF_900104555.1_IMG-
taxon_2651870172_annotated_assembly_genomic.fna_20:569803-570062
Satlength=260 Nr of Repeats=5 RepeatLength=52 seed=GTTTTGTCTG Num.seqs=4
Similarity=0.807692 0 GTTTTGTCTGATA-GA-
CGCTTCCTATTAGACAACTCTCCTCCCGAGACCACCT
```

GT TTTGTCTaATAgGAqCGCtTcCTATcaGACAAACTaacCTCcCaGaCCaCCT

Similarity=0.923077 0 GCCGCTTC-CAAGGCT-  
GTTTCGAACACGATTAGCTTCTATTCGTTAACGTTCA  
Rev.of\_GCF\_900107275.1\_IMG-  
taxon\_2675903024\_annotated\_assembly\_genomic.fna\_42:756073-756385  
Satlength=313 Nr of Repeats=5 RepeatLength=52 seed=CGAAAGTAGT Num.seqs=4  
Similarity=0.931624 21 GCGGCTTCTCAA--  
CTACTTTCGATCACGATTAGCTCCTTTTCTTTTACGTACA

\*\* \*\*\*\*\* \*\* \*\*\*\*\* \*\*\*\*\* \*\* \*\* \*

Consensus:

GCcGCTTcCAAggCTacTTTCGAaCACGATTAGCTcCTaTTCgTTaACGTaCA

>Bacillus\_Fam\_473\_54\_2 Nr. of seq. 2 Alignment length(with gaps) = 54  
Alignment score = 0.654321  
GCF\_000181495.1\_ASM18149v1\_genomic.fna\_106:8005-8522 Satlength=518 Nr of  
Repeats=8 RepeatLength=53 seed=TCGAAAAGAA Num.seqs=5 Similarity=0.939623  
0 TCGAAAAGAAGCTAAACGATCCAATGAGAAGGGGAAACCGAGTGGATGTAGG-G  
GCF\_000181495.1\_ASM18149v1\_genomic.fna\_107:1831-2096 Satlength=266 Nr of  
Repeats=5 RepeatLength=53 seed=TGAAAAAGAG Num.seqs=5 Similarity=0.899371  
0 T-GAAAAAGAGGTAACCGCCCCAACGAGAAAGGGAAACCAAGCGGATGTTGGTG

\* \*\*\*\*\* \*\* \*\* \* \*\*\*\*\* \*\*\*\*\* \*\* \*\*\*\*\* \*\* \*

Consensus:

TcGAAAAaaAGcTAAaCGacCCAAcGAGAAaGGGAAACCaAGcGGATGTaGGtG

>Bacillus\_Fam\_474\_54\_2 Nr. of seq. 2 Alignment length(with gaps) = 54  
Alignment score = 0.635802  
GCF\_000181495.1\_ASM18149v1\_genomic.fna\_139:7643-8120 Satlength=478 Nr of  
Repeats=9 RepeatLength=53 seed=TGAAATGATG Num.seqs=9 Similarity=0.769818  
0 TGAAATGATGTCCGCGCCTGGC-GAGCGCATGACATCATTATGAAGTTCGTNA  
Rev.of\_GCF\_000181495.1\_ASM18149v1\_genomic.fna\_186:108256-108627  
Satlength=372 Nr of Repeats=7 RepeatLength=53 seed=GCGGTACATC Num.seqs=7  
Similarity=0.828691 16  
TGCAATGATGTACCGCG-CTGACTGTGCGCATGGCATCATTTTGTGATTCCTGT

\*\* \*\*\*\*\* \*\*\*\*\* \*\* \* \*\*\*\*\* \*\*\*\*\* \*\* \*\* \*

Consensus:

TGaAATGATGTaCCGCGcCTGaCtGaGCGCATGaCATCATTaTGaaaTTCcTga

>Bacillus\_Fam\_475\_54\_2 Nr. of seq. 2 Alignment length(with gaps) = 54  
Alignment score = 0.709877  
GCF\_000181495.1\_ASM18149v1\_genomic.fna\_170:14885-15361 Satlength=477 Nr  
of Repeats=8 RepeatLength=53 seed=ATGTTGGTCT Num.seqs=5  
Similarity=0.738272  
0 ATGTTGGTCTGATTAGGATGTTTTAGNCCAATGAGACTCAATATTC-AAGGAG  
GCF\_000181495.1\_ASM18149v1\_genomic.fna\_183:28650-29233 Satlength=584 Nr  
of Repeats=10 RepeatLength=53 seed=GAGCTAATCA Num.seqs=9  
Similarity=0.796296  
16 ATGTTGGTCTGTTTAGGAGCTAATCAGGCCAGTGAGATTCAATTTTCGAAGG-G

\*\*\*\*\* \*\*\*\*\* \* \*\*\*\*\* \*\*\*\*\* \*\*\*\*\* \*\* \*\*\*\*\* \*

Consensus:

ATGTTGGTCTGaTTAGGAgcTaaTCAGgCCAAaTGAGAcTCAATaTTCgAAGGaG

>Bacillus\_Fam\_476\_54\_2 Nr. of seq. 2 Alignment length(with gaps) = 54  
Alignment score = 0.827160  
GCF\_000708755.2\_ASM70875v2\_genomic.fna\_1:195812-196130 Satlength=319 Nr  
of Repeats=6 RepeatLength=53 seed=TTATCGGCTT Num.seqs=6  
Similarity=0.755556

0 TTATCGGCTTGATTAGAACCATCAA-GGAAAGGAAGAAGCATGCTTGAGGGTAC  
GCF\_000709935.2\_ASM70993v2\_genomic.fna\_1:196645-196910 Satlength=266 Nr  
of Repeats=5 RepeatLength=53 seed=TGATTAGAAC Num.seqs=5  
Similarity=0.861635

9 TTATCGGCGTGATTAGAACCACCAAGGGACAGG-AGAAGCATGCTTGAGGGTAT

\*\*\*\*\*

Consensus:

TTATCGGCgTGATTAGAACCACCAAgGGAaAGGaAGAAGCATGCTTGAGGGTAc

>Bacillus\_Fam\_477\_54\_2 Nr. of seq. 2 Alignment length(with gaps) = 54  
Alignment score = 0.913580  
GCF\_000708755.2\_ASM70875v2\_genomic.fna\_6:313159-313635 Satlength=477 Nr  
of Repeats=9 RepeatLength=53 seed=GACTTGTGGC Num.seqs=8  
Similarity=0.765983

0 GACTTGTGGCACCACCTAGGCGGAGTGATACCACTTTTCACTCTTCCA-CCACCG  
GCF\_000709935.2\_ASM70993v2\_genomic.fna\_5:520546-520916 Satlength=371 Nr  
of Repeats=7 RepeatLength=53 seed=TGTGGCACCA Num.seqs=6  
Similarity=0.747325

4 GACTTGTGGCACCACCTAGGCGGAGTGACCACTTTTCACTCTTCCANCCATCG

\*\*\*\*\*

Consensus:

GACTTGTGGCACCACCTAGGCGGAGTGAcACCACTTTTCACTCTTCCAnCCAcCG

>Bacillus\_Fam\_478\_54\_2 Nr. of seq. 2 Alignment length(with gaps) = 54  
Alignment score = 0.669753  
GCF\_001420715.1\_ASM142071v1\_genomic.fna\_22:1363621-1363829 Satlength=209  
Nr of Repeats=4 RepeatLength=52 seed=ATGAAGGACA Num.seqs=4  
Similarity=0.570988 40

TGAAGCAAGAGAAAGA-AGGAAGTGTCTTCACAAAGGTTGATGAAGGACAAAA  
Rev.of\_GCF\_001591485.1\_ASM159148v1\_genomic.fna\_34:25092-25304  
Satlength=213 Nr of Repeats=4 RepeatLength=53 seed=CCCTTCATGA Num.seqs=4  
Similarity=0.907757 91  
CTAAGGAAGAGAAGGATAAAAATTGTCCTTCATGAAGGGTA-TGAAGGACAAAA

\*\*\*\*\*

Consensus:

aTGAAGGACAAAAcgaAGcAAGAGAAaGAtAaaAAgTGTCTTCaAAGGgTa

>Bacillus\_Fam\_479\_54\_2 Nr. of seq. 2 Alignment length(with gaps) = 54  
Alignment score = 0.657407

GCF\_001439915.1\_ASM143991v1\_genomic.fna\_83:403240-403615 Satlength=376 Nr of Repeats=8 RepeatLength=53 seed=CAATTTGGAG Num.seqs=5  
Similarity=0.851852 0  
CAATTTGGAGGTCCACCATATTTCCAATAATTAGGAGAATGGTGCCCCCTCGAAN-  
GCF\_001439915.1\_ASM143991v1\_genomic.fna\_84:151113-151792 Satlength=680 Nr of Repeats=13 RepeatLength=53 seed=GAAGGTCACCT Num.seqs=11  
Similarity=0.830303 6  
NGTTTTGAAGGT-CACTATATACCAGTAATTAGGAGAATAGTGCCACTCCATTT

\*\*\*\* \*  
Consensus:

caaTTTGaAGGTcCACcATATaCCAaTAATTAGGAGAATaGTGCCaCTCcAatt

>Bacillus\_Fam\_480\_54\_2 Nr. of seq. 2 Alignment length(with gaps) = 54  
Alignment score = 0.790123  
GCF\_002019605.1\_ASM201960v1\_genomic.fna\_1:3068298-3068510 Satlength=213  
Nr of Repeats=4 RepeatLength=53 seed=TCATAGTGAC Num.seqs=4  
Similarity=0.844864 0  
TCATAGTGACCGTCCGAGCAGGAAACCAGGTGAGAGCGGTCACTAT-CAAGAGC  
GCF\_002019605.1\_ASM201960v1\_genomic.fna\_1:3905986-3906776 Satlength=791  
Nr of Repeats=15 RepeatLength=53 seed=GCTCATAGTG Num.seqs=10  
Similarity=0.746296 52  
TCATAGTGCCCATCCGAGAAGGAAATCAGGTGAGTACGGTCACTATGAAAGAGC

\*\*\*\*\*  
Consensus:

TCATAGTGaCCaTCCGAGaAGGAAAcCAGGTGAGaaCGGTCACTATgaAAGAGC

>Bacillus\_Fam\_481\_54\_2 Nr. of seq. 2 Alignment length(with gaps) = 54  
Alignment score = 0.882716  
GCF\_001887185.1\_ASM188718v1\_genomic.fna\_148:138342-138666 Satlength=325  
Nr of Repeats=6 RepeatLength=54 seed=TATAACAAAT Num.seqs=4  
Similarity=0.868313 0  
TATAACAAATATAGTAGCAGAACGAGGAATCGTATCCCCAGCACCAGTAAATAG  
GCF\_002009555.1\_ASM200955v1\_genomic.fna\_427:1374-1752 Satlength=379 Nr of Repeats=7 RepeatLength=54 seed=GCACCAGTAA Num.seqs=7 Similarity=0.891828  
40 TATAACAAATGTAGTAGCGGAGCGAGGAATCGTGTCNCCAGCACCAGTAAATAG

\*\*\*\*\*  
Consensus:

TATAACAAATaTAGTAGCaGAaCGAGGAATCGTaTCCcCAGCACCAGTAAATAG

>Bacillus\_Fam\_482\_53\_2 Nr. of seq. 2 Alignment length(with gaps) = 53  
Alignment score = 0.672956  
GCF\_000181495.1\_ASM18149v1\_genomic.fna\_116:6074-6381 Satlength=308 Nr of Repeats=6 RepeatLength=51 seed=AGGACGATAA Num.seqs=5 Similarity=0.900654  
0 AGGACGATAAAATAAG-AAAATTAAAATTAAAGTACTATAGAGAGGTTT-TAA  
GCF\_000181495.1\_ASM18149v1\_genomic.fna\_182:70379-70940 Satlength=562 Nr of Repeats=11 RepeatLength=51 seed=GAAATTAAAG Num.seqs=9  
Similarity=0.963689  
22 AGGAC-ATTAAAAAAGCAAAAGCGAAATTAAAGTCCTATA-AAAGGTTTCTAA

\*\*\*\*\* \*\* \*\*\* \*\*

Consensus:

AGGACgATaAAAAaAGcAAAAgcaAAATTAAAGTaCTATAgAaAGGTTTcTAA

>Bacillus\_Fam\_483\_53\_2 Nr. of seq. 2 Alignment length(with gaps) = 53

Alignment score = 0.676101

GCF\_000181495.1\_ASM18149v1\_genomic.fna\_183:116608-117220 Satlength=613 Nr

of Repeats=12 RepeatLength=51 seed=AAACTCCAAA Num.seqs=10

Similarity=0.941903

0

AAACTCCAAATTATCGTCCTTTAAAACGGC-TCTATAAGACATTAAT-TACTC

Rev.of\_GCF\_000181495.1\_ASM18149v1\_genomic.fna\_186:301034-301853

Satlength=820 Nr of Repeats=16 RepeatLength=51 seed=TTTAAAGGAC

Num.seqs=11 Similarity=0.656718

24 -CACCCCAANTTATCGTCCTTT-AAAGGGCTTCTATAGGACGTTAATCTCCTN

\*\* \*\*\*\* \*\*\*\*\* \*\*

Consensus:

aaACcCCAAaTTATCGTCCTTTaAAAcGGCtTCTATAaGACaTTAATcTaCTc

>Bacillus\_Fam\_484\_53\_2 Nr. of seq. 2 Alignment length(with gaps) = 53

Alignment score = 0.625786

GCF\_000292245.2\_ASM29224v2\_genomic.fna\_23:12860-13115 Satlength=256 Nr of

Repeats=5 RepeatLength=51 seed=TTCATTACCT Num.seqs=5 Similarity=0.755128

0 TTCATTACCTATTCCTGACTATTCGCACCTTAATTTTGCA--TTCGCCGTGGT

GCF\_000292245.2\_ASM29224v2\_genomic.fna\_87:12883-13293 Satlength=411 Nr of

Repeats=8 RepeatLength=51 seed=CTTTTTTCAT Num.seqs=6 Similarity=0.904139

45 -TCATTACTTATCCTTTGTTATTTCGCACCTTAATTTGGCACGTTC-CCTTTTT

\*\*\*\*\* \*\* \* \* \*\*\*\*\* \*\*

Consensus:

tTCATTACcTATcCcTgacTATTCGCACCTTAATTTgGCacgTTCgCCgTggT

>Bacillus\_Fam\_485\_53\_2 Nr. of seq. 2 Alignment length(with gaps) = 53

Alignment score = 0.685535

GCF\_000752035.1\_Bacillus\_rubiinfantis\_genomic.fna\_11:92768-93125

Satlength=358 Nr of Repeats=7 RepeatLength=51 seed=TTTTTGTTCCA Num.seqs=7

Similarity=0.915344

0 T-

TTTTTGTTCCAATAGACCGCTGCTATCGGACAACCTT-TTTCGAAAACAGGCT

GCF\_900104555.1\_IMG-

taxon\_2651870172\_annotated\_assembly\_genomic.fna\_22:525505-525906

Satlength=402 Nr of Repeats=8 RepeatLength=52 seed=GTTTTGTCCA Num.seqs=6

Similarity=0.831687

1

TGTTTTGTCCAATAGACCGCCCTATCGAACAAATTCTTTCCCAGAC-CGCT

\* \*\*\*\*\* \*\*\*\*\* \*\*

Consensus:

TgTTTTGTCCAATAGACCGCccCTATCGaACAAaTTcTTTCCcaAaACacGCT

>Bacillus\_Fam\_486\_53\_2 Nr. of seq. 2 Alignment length(with gaps) = 53  
Alignment score = 0.635220  
GCF\_001636335.1\_ASM163633v1\_genomic.fna\_1:554579-554937 Satlength=359 Nr  
of Repeats=7 RepeatLength=51 seed=AAAAAGGAGT Num.seqs=6  
Similarity=0.877996  
0 AAAAAGGAGTGAAGTAAAAATAGGTAGTTAAG--AGGCGTTTAAACTCCCGA  
Rev.of\_GCF\_001636335.1\_ASM163633v1\_genomic.fna\_1:1522005-1522515  
Satlength=511 Nr of Repeats=10 RepeatLength=51 seed=GGGCGTTATA  
Num.seqs=10 Similarity=0.911111  
49 AAATCGGAGAATCAGAAAAATTGGTAGTTAAGCCA-GC-TTTATAACGCCCGA

\*\*\* \*\* \* \*\*\*\*\* \*\*\*\*\* \* \*\* \* \* \* \*

Consensus:

AAAAaGGAGaaaCaGAAAAATaGGTAGTTAAGccAgGCgTTTAaAACgCCCGA

>Bacillus\_Fam\_487\_53\_2 Nr. of seq. 2 Alignment length(with gaps) = 53  
Alignment score = 0.679245  
GCF\_000169195.2\_ASM16919v2\_genomic.fna\_1:334661-335181 Satlength=521 Nr  
of Repeats=9 RepeatLength=52 seed=TGAAGGACAT Num.seqs=8  
Similarity=0.706570  
0 TGAAGGACATTTTAATG-GTTCGTGGCTCGCGTTTTGTCCTTCATTANCCCGA  
GCF\_001636335.1\_ASM163633v1\_genomic.fna\_1:3219373-3219737 Satlength=365  
Nr of Repeats=7 RepeatLength=52 seed=ACTTTTGTGAC Num.seqs=7  
Similarity=0.936508  
TGAAGGACTTTTTGACGTGCCCCCTTGCTC-CGCTTTGTCCTTCATTACCCGA

6

\*\*\*\*\* \*\*\*\* \* \* \* \* \* \*\*\*\*\* \*\* \*\*\*\*\* \*\*\*\*\*

Consensus:

TGAAGGACaTTTTaAcGtGccCcTgGCTCgCGcTTTGTCTTCATTaaCCCGA

>Bacillus\_Fam\_488\_53\_2 Nr. of seq. 2 Alignment length(with gaps) = 53  
Alignment score = 0.613208  
GCF\_000169195.2\_ASM16919v2\_genomic.fna\_1:636213-636421 Satlength=209 Nr  
of Repeats=4 RepeatLength=52 seed=GTTCCTTAAC Num.seqs=4  
Similarity=0.806080  
0 GTTCCTTAACGTAGAACCACTCTATGTGAAGTTATGACCGGATTTTTCGTCT-  
GCF\_000169195.2\_ASM16919v2\_genomic.fna\_1:1145839-1146151 Satlength=313 Nr  
of Repeats=6 RepeatLength=52 seed=TCTATGTTAA Num.seqs=6  
Similarity=0.768485  
CTTCCTTAACGTAGAGCCTCTCTATGTTAAGATA-CACGGCAGATTTTCAGCTG

20

\*\*\*\*\* \*\*\*\*\* \*\* \*\*\*\*\* \*\* \*\* \* \* \* \* \*

Consensus:

cTTCCTTAACGTAGAAcCaCTCTATGTgAAcaTAtcACcGcAgaTTTCagCTg

>Bacillus\_Fam\_489\_53\_2 Nr. of seq. 2 Alignment length(with gaps) = 53  
Alignment score = 0.628931  
GCF\_000169195.2\_ASM16919v2\_genomic.fna\_1:2292482-2293472 Satlength=991 Nr  
of Repeats=19 RepeatLength=52 seed=AATGTCTTTT Num.seqs=18  
Similarity=0.800551  
AATGTCTTTTACAANGGCTCAAAGGACAAAAG-GGTGCACGTTGCCGGTTGA

0



GCF\_000217835.1\_ASM21783v1\_genomic.fna\_1:954299-954610 Satlength=312 Nr of Repeats=6 RepeatLength=52 seed=AAAAGACAAA Num.seqs=5 Similarity=0.805128

21 ACTGTCTTTTACAACGGTTCAAAAAGACAAAAGCGTTCCAGCTTTCC-ACCGA

\* \*\*\*\*\* \*\* \*\*\*\*\* \*\*\*\*\* \* \* \*\* \*\* \*\*

Consensus:

AaTGTCTTTTACAACGGcTCAAAAaGACAAAAGcGgTcCAccTTgCCgaccGA

>Bacillus\_Fam\_490\_53\_2 Nr. of seq. 2 Alignment length(with gaps) = 53

Alignment score = 0.622642

GCF\_000175075.1\_ASM17507v1\_genomic.fna\_5:15548-15860 Satlength=313 Nr of Repeats=6 RepeatLength=52 seed=GTCAGAGAGG Num.seqs=6 Similarity=0.822428

0 GTCAGAGAGGTCTTGATAGCGGTTATGAGGACATCTG-TTGGTGAGAAATGAG

GCF\_000175075.1\_ASM17507v1\_genomic.fna\_33:121241-121605 Satlength=365 Nr of Repeats=7 RepeatLength=52 seed=TTATGAAGAC Num.seqs=7 Similarity=0.838828

21 G-GAGAGAGGTCTTCATCGCACTTATGAAGACGTCAGTTTGGAGAGAAAGGCC

\* \*\*\*\*\* \*\* \*\* \*\*\*\*\* \*\*\* \*\* \* \*\*\*\*\* \*\*\*\*\* \*

Consensus:

GtcAGAGAGGTCTTcATaGCacTTATGAaGACaTCaGtTTGGaGAGAAAgGac

>Bacillus\_Fam\_491\_53\_2 Nr. of seq. 2 Alignment length(with gaps) = 53

Alignment score = 0.672956

GCF\_000175075.1\_ASM17507v1\_genomic.fna\_29:40755-41014 Satlength=260 Nr of Repeats=5 RepeatLength=52 seed=TCTCTGTTAC Num.seqs=4 Similarity=0.948718

41 G-AACGCCATTGTTTTTCGGGGCTTCGGGCTTTGAGACGCCCTCTCTGTTACC

GCF\_000175075.1\_ASM17507v1\_genomic.fna\_29:166890-167254 Satlength=365 Nr of Repeats=7 RepeatLength=52 seed=CTCTCTGTTA Num.seqs=7 Similarity=0.794872

92 GTTCCCTGCTGTTGCTCGGCG-TTCGGGCTTTGAGAGGCCCTCTCTGTTACC

\*\*\*\*\* \* \* \*\*\*\*\* \*\*\*\*\* \* \*\*\*\*\* \*\*\*\*\*

Consensus:

TCTCTGTTACCGtaaCcCcacTGTTgcTCGGcGcTTCGGGCTTTGAGAcGCCC

>Bacillus\_Fam\_492\_53\_2 Nr. of seq. 2 Alignment length(with gaps) = 53

Alignment score = 0.638365

GCF\_000175075.1\_ASM17507v1\_genomic.fna\_32:50201-50513 Satlength=313 Nr of Repeats=6 RepeatLength=52 seed=TTCGGTCAAA Num.seqs=6 Similarity=0.829060

0 TTCGGTCAAATAGAAGGGCTCTATACGCCCGAAGCGGAAGTGAGACTGGGAG-

GCF\_000175075.1\_ASM17507v1\_genomic.fna\_34:151816-152128 Satlength=313 Nr of Repeats=6 RepeatLength=52 seed=GAGCTTCGGT Num.seqs=6 Similarity=0.837607

48 TTCGGTCGTATAGAAGGGCTCTATAAGCCTAAAGAGCAACT-ATAGCCGGAGC

\*\*\*\*\* \*\*\*\*\* \*\*\*\*\* \*\*\* \*\* \* \* \* \* \*

Consensus:

TTCGGTCAaATAGAAGGGCTCTATAaGCCcaAAGaGcAAcTgAgAcccGGAGc

>Bacillus\_Fam\_493\_53\_2 Nr. of seq. 2 Alignment length(with gaps) = 53  
Alignment score = 0.660377  
GCF\_000175075.1\_ASM17507v1\_genomic.fna\_32:253955-254216 Satlength=262 Nr of Repeats=5 RepeatLength=52 seed=ATGAAGACAT Num.seqs=4  
Similarity=0.901709  
0 ATGAAGACATCAGTAGCG-TGAAAACCGGTAGAGAGAGGTCTTGAGAAGAGGC  
GCF\_000175075.1\_ASM17507v1\_genomic.fna\_36:46227-46487 Satlength=261 Nr of Repeats=5 RepeatLength=52 seed=AGAGAGGTCT Num.seqs=5 Similarity=0.823077  
31 ATGAAGACATCTGTTGNNCTAATCACAGCT-GAGAGAGGTCTTGAGAAGTGA

\*\*\*\*\* \*\* \* \* \* \* \*\*\*\*\* \*\*

Consensus:

ATGAAGACATCaGTaGcgcTaAaaACaGcTaGAGAGAGGTCTTGAGAAGaGGa

>Bacillus\_Fam\_494\_53\_2 Nr. of seq. 2 Alignment length(with gaps) = 53  
Alignment score = 0.660377  
GCF\_000175075.1\_ASM17507v1\_genomic.fna\_36:67347-67919 Satlength=573 Nr of Repeats=11 RepeatLength=52 seed=AGCGAATGAA Num.seqs=11  
Similarity=0.862471  
0 AGCGAATGAAGACATCAGTGAAGCAGGAAAC-GAGNNAGAGAAGTCTTCATGA  
GCF\_000175075.1\_ASM17507v1\_genomic.fna\_43:58907-59115 Satlength=209 Nr of Repeats=4 RepeatLength=52 seed=GTTATGAAGA Num.seqs=4 Similarity=0.901709  
2 AGGTTATGAAGACATGAGTG-ACCGGAATCTGAGTGAGAGATGTCTTCATGG

\*\* \*\*\*\*\* \*\*\*\* \* \* \*\*\*\*\* \* \*\*\* \*\*\*\*\* \*\*\*\*\*

Consensus:

AGcgaATGAAGACATcAGTGaAcCaGGAAaCtGAGtgAGAGAAgTCTTCATGa

>Bacillus\_Fam\_495\_53\_2 Nr. of seq. 2 Alignment length(with gaps) = 53  
Alignment score = 0.647799  
GCF\_000175075.1\_ASM17507v1\_genomic.fna\_47:55295-55555 Satlength=261 Nr of Repeats=5 RepeatLength=52 seed=GGGTCCCTCAT Num.seqs=5 Similarity=0.835897  
0 GGGTCCTCATAAGGCTGATGAAGACATGAGTTGGTT-GAATTTGTGCGAGAG  
Rev.of\_GCF\_900156865.1\_PRJEB18960\_genomic.fna\_3:2588481-2588898  
Satlength=418 Nr of Repeats=8 RepeatLength=52 seed=TCAGGTCTTC Num.seqs=7  
Similarity=0.874237 29  
AGGTTCCTCATAAGTGTTATGAAGACCTGAG-TGGTTGGGATATTATTCGAAAG

\*\*\* \*\*\*\*\* \* \*\*\*\*\* \*\*\*\*\* \* \* \* \* \* \*

Consensus:

aGGTcCTCATAAGgcTgATGAAGACaTGAGtTGGTTgGaATaTTaTgCGAAaAG

>Bacillus\_Fam\_496\_53\_2 Nr. of seq. 2 Alignment length(with gaps) = 53  
Alignment score = 0.713836  
GCF\_000177235.2\_ASM17723v2\_genomic.fna\_1:3849630-3849838 Satlength=209 Nr of Repeats=4 RepeatLength=52 seed=GCTATTTTAG Num.seqs=4  
Similarity=0.943920 0  
GCTATTTTAGTTTGCTGCCCTTTCTTATGCTGTTCCCTTACTTTGAATGGGCT-  
GCF\_000177235.2\_ASM17723v2\_genomic.fna\_1:3977361-3977881 Satlength=521 Nr of Repeats=10 RepeatLength=52 seed=CACCTTACAA Num.seqs=10

36

\*\*\*\*\*

\*\*\*\*\*

\*\*\*\*\*      \*\*\*      \*    \*\*    \*\*    \*    \*\*\*\*\*    \*\*\*\*\*    \*\*    \*\*\*\*\*

\*\*\* \* \* \* \* \*\*\*\*\* \*\*\* \*\*\*\*\* \*\*\*\* \* \* \* \* \*

CGaGaAcGcAaGAAAAAGaGAAAaaaCGGTAAcTAGTaGAGGCGaCTAaTGCC

>Bacillus\_Fam\_500\_53\_2 Nr. of seq. 2 Alignment length(with gaps) = 53  
Alignment score = 0.823899  
GCF\_000612665.1\_FF4\_genomic.fna\_66:68659-68921 Satlength=263 Nr of  
Repeats=5 RepeatLength=52 seed=GTCACGTAGA Num.seqs=4 Similarity=0.893606  
0 GTCACGTAGAGCCTGTCTACGTTACCCAAATCTAG-TCTTTTCAATGTTTACG  
GCF\_000612665.1\_FF4\_genomic.fna\_72:16126-16334 Satlength=209 Nr of  
Repeats=4 RepeatLength=52 seed=TACGTTACCC Num.seqs=4 Similarity=1.000000  
17 GTCACGTAGAGGCTGTCTACGTTACCCATATCCAGCTC-TTTCATGTTTTTCG

\*\*\*\*\*  
Consensus:

GTCACGTAGAGcCTGTCTACGTTACCCAAATCcAGcTcTtTTTCAATGTTTaCG

>Bacillus\_Fam\_501\_53\_2 Nr. of seq. 2 Alignment length(with gaps) = 53  
Alignment score = 0.757862  
GCF\_000708755.2\_ASM70875v2\_genomic.fna\_22:103405-103718 Satlength=314 Nr  
of Repeats=6 RepeatLength=52 seed=AATAGAACCA Num.seqs=5  
Similarity=0.704321  
0 AATAGAACCATCAAAACCGAAAATGAGCAGCTTGATGGCNCTAANCAGGCNG-  
GCF\_000709935.2\_ASM70993v2\_genomic.fna\_24:214095-214304 Satlength=210 Nr  
of Repeats=4 RepeatLength=52 seed=AATAGAACCA Num.seqs=3  
Similarity=0.708595  
0 AATAGAACCATCAAAANCGTGAATCAAAAGCTTGATGGCNCTAAACAGGC-GT

\*\*\*\*\*  
Consensus:

AATAGAACCATCAAAAcCGaaAATcAaaAGCTTGATGGCNCTAAaCAGGCnGt

>Bacillus\_Fam\_502\_53\_2 Nr. of seq. 2 Alignment length(with gaps) = 53  
Alignment score = 0.710692  
GCF\_000752395.1\_Bacillus\_andreraoultii\_genomic.fna\_41:44624-45040  
Satlength=417 Nr of Repeats=8 RepeatLength=52 seed=TCTATGAGCC Num.seqs=8  
Similarity=0.856151 0  
TCTATGAGCCCGAAAATCAGGTG-AAGGATCAAAAATGGGTTTCATAGACCGAA  
Rev.of\_GCF\_000752395.1\_Bacillus\_andreraoultii\_genomic.fna\_24:138370-  
138786 Satlength=417 Nr of Repeats=8 RepeatLength=52 seed=GGGATCATAG  
Num.seqs=8 Similarity=0.711310 11  
TCTATGATCCCAAAATTCGAGTGNAAGAGCAAAAATGGTTGATAGAACGAA

\*\*\*\*\*  
Consensus:

TCTATGAgCCCaAAAATCaaGTGnAAaGAgCAAAAATgGGTTcATAGAAcCGAA

>Bacillus\_Fam\_503\_53\_2 Nr. of seq. 2 Alignment length(with gaps) = 53  
Alignment score = 0.672956  
GCF\_000813125.1\_ASM81312v1\_genomic.fna\_15:34784-35096 Satlength=313 Nr of  
Repeats=6 RepeatLength=52 seed=TGACAGCTTT Num.seqs=6 Similarity=0.786325  
0 TGACAGCTTTTCTGGTGAATGA-GCCAAAGCTGTCATGATTCCTCCGTTATTC  
GCF\_000813125.1\_ASM81312v1\_genomic.fna\_130:47-256 Satlength=210 Nr of  
Repeats=4 RepeatLength=52 seed=TGTCATGATT Num.seqs=3 Similarity=0.914530  
30 TGACAGGTTTGATGATG-CTGAGGACAAAGCTGTCATGATTACACAGTTATTT

\*\*\*\*\* \*\* \*\* \*\* \* \*\*\*\*\* \* \* \*\*\*\*\*

Consensus:

TGACAGcTTTgATGaTGaaTGAGaCAAAGCTGTCATGATTaCaCaGTTATTc

>Bacillus\_Fam\_504\_53\_2 Nr. of seq. 2 Alignment length(with gaps) = 53

Alignment score = 0.679245

GCF\_000813125.1\_ASM81312v1\_genomic.fna\_25:31-239 Satlength=209 Nr of Repeats=4 RepeatLength=52 seed=GCTTTTCTTG Num.seqs=4 Similarity=0.805556

0 GC-TTTTCTTGACAGCTTTGGCCCCGTATCCTTGAAACCTGTCACAATAACTA

GCF\_001315165.1\_ASM131516v1\_genomic.fna\_8:68848-69212 Satlength=365 Nr of Repeats=7 RepeatLength=52 seed=GAATCTTGAC Num.seqs=7 Similarity=0.847375

3 NCGGAATCTTGACAGCTTTGGCCCCGGATCCAGAAAAGCTGTCACAAAAC-A

\* \*\*\*\*\* \*\*\*\* \*\*\* \*\*\*\*\* \*\* \*

Consensus:

gCggaaTCTTGACAGCTTTGGCCCCgATCCagaAAAcCTGTCACAAaAACTa

>Bacillus\_Fam\_505\_53\_2 Nr. of seq. 2 Alignment length(with gaps) = 53

Alignment score = 0.723270

GCF\_000813125.1\_ASM81312v1\_genomic.fna\_119:16360-16620 Satlength=261 Nr of Repeats=5 RepeatLength=52 seed=ATGACGGACA Num.seqs=5

Similarity=0.844025

0 ATGACGGACACTTTTCCTCTCAA-TCTCGCTCTTTCTGTCCGTCATCACGTCT

Rev.of\_GCF\_001315165.1\_ASM131516v1\_genomic.fna\_3:68869-69077

Satlength=209 Nr of Repeats=4 RepeatLength=52 seed=TGTCGGTCAT Num.seqs=4

Similarity=0.867521

10

ATGACGGACACTTTTCTCTCAATTATCG-AATTTCTGTCCGTCATCGGGGTT

\*\*\*\*\* \*\*\*\*\* \* \*\*\* \*\*\*\*\* \* \*

Consensus:

ATGACGGACACTTTTCcTCTCAAtTaTCGcaaTTTCTGTCCGTCATCacGgcT

>Bacillus\_Fam\_506\_53\_2 Nr. of seq. 2 Alignment length(with gaps) = 53

Alignment score = 0.622642

GCF\_000813125.1\_ASM81312v1\_genomic.fna\_122:25239-25553 Satlength=315 Nr of Repeats=5 RepeatLength=52 seed=GACATTTCCCT Num.seqs=4

Similarity=0.841880

0 GACATTTCCCTGGGATTCTG-CCCCCTGTTGGCCGATAGACCCCTTCTATCG

Rev.of\_GCF\_001315165.1\_ASM131516v1\_genomic.fna\_117:8723-8931

Satlength=209 Nr of Repeats=4 RepeatLength=52 seed=TCTATCGGAC Num.seqs=4

Similarity=0.785115

40

GACAGAT-TTAGGATATTGTCCTTCTGTTTGTCCGATAGAGCCCTTCTAATG

\*\*\*\* \* \*\* \*\*\*\* \*\* \*\* \*\*\*\*\* \*\*\*\*\* \*\*\*\*\* \*

Consensus:

GACAGaTccTTaGGATacTgtCCccCTGTTTGgCCGATAGAcCCCTTCTAacG

>Bacillus\_Fam\_507\_53\_2 Nr. of seq. 2 Alignment length(with gaps) = 53

Alignment score = 0.610063

GCF\_000813125.1\_ASM81312v1\_genomic.fna\_134:91815-92127 Satlength=313 Nr of Repeats=6 RepeatLength=52 seed=AAAAACAGGG Num.seqs=6  
Similarity=0.830769  
0 AAAAAACAGGGCACCAATACAGCCTATTGATGACCTAAAT-CTCGAAAATACGA  
Rev.of\_GCF\_001420595.1\_ASM142059v1\_genomic.fna\_11:1279366-1279626  
Satlength=261 Nr of Repeats=5 RepeatLength=52 seed=TAGCGGATTT Num.seqs=5  
Similarity=0.753846 2  
TAATTC-GGTAACCAATACAGCNTATTGGCGACCTTANTCCTCCAAAATCCGC

\*\* \* \*\* \*\*\*\*\* \*\* \* \* \* \* \*  
Consensus:

aAAaCaGGGaACCAATACAGCcTATTGacGACCTaAaTcCTCcAAAATaCGa

>Bacillus\_Fam\_508\_53\_2 Nr. of seq. 2 Alignment length(with gaps) = 53  
Alignment score = 0.915094  
GCF\_000986785.1\_ASM98678v1\_genomic.fna\_11:5-369 Satlength=365 Nr of Repeats=7 RepeatLength=52 seed=TCTCAGTGCC Num.seqs=7 Similarity=0.799341  
0 TCTCAGTGCCCGAAATGTCTCCTGCCACTACAAANAGGTCACCTGACANCTCC-  
GCF\_000986785.1\_ASM98678v1\_genomic.fna\_16:123816-124024 Satlength=209 Nr of Repeats=4 RepeatLength=52 seed=AGGGCACTGA Num.seqs=4  
Similarity=0.788260  
35 TCTCAGTGCCCGAAATGTCTCCTGCCACTACAAACAGGGCACTGACACCTCCT

\*\*\*\*\*  
Consensus:

TCTCAGTGCCCGAAATGTCTCCTGCCACTACAAAcAGGgCACTGACAcCTCct

>Bacillus\_Fam\_509\_53\_2 Nr. of seq. 2 Alignment length(with gaps) = 53  
Alignment score = 0.628931  
GCF\_001315045.1\_ASM131504v1\_genomic.fna\_27:2070-2330 Satlength=261 Nr of Repeats=5 RepeatLength=52 seed=TGTCCGAAGA Num.seqs=5 Similarity=0.838462  
0 TGTCCGAAGAGAGAGNATCTTCGGACAGGAAGGCGGAACAA-AGCGAAAAGC  
GCF\_001315045.1\_ASM131504v1\_genomic.fna\_33:22668-22876 Satlength=209 Nr of Repeats=4 RepeatLength=52 seed=GTTCGGACAG Num.seqs=4  
Similarity=0.722222  
18 TGTCCGAAGAGAGTGCAAGTTCGGACA-GAAAACCGGGTGAAGAGCTAGAAGG

\*\*\*\*\* \* \* \*\*\*\*\* \*\* \* \* \* \* \*  
Consensus:

TGTCCGAAGAGAGaGcAacTTCGGACAgGAAAcCGGaacAAgAGCgAaAAGc

>Bacillus\_Fam\_510\_53\_2 Nr. of seq. 2 Alignment length(with gaps) = 53  
Alignment score = 0.622642  
GCF\_001315045.1\_ASM131504v1\_genomic.fna\_43:12-220 Satlength=209 Nr of Repeats=4 RepeatLength=52 seed=AGTTCGGACA Num.seqs=4 Similarity=0.833333  
0 AGTTCGGACAAGA-ATGAGGGGAAGAAGCAGAAAGTTGTCCGAAGAAGGCACA  
Rev.of\_GCF\_001420595.1\_ASM142059v1\_genomic.fna\_11:3566111-3566319  
Satlength=209 Nr of Repeats=4 RepeatLength=52 seed=TCTTGTCCGA Num.seqs=4  
Similarity=0.811966 13  
AGTTCGGACAAGATTTCACTTGAATAAGC-CAAAGCAGTCCGAAGTGGGCTCA

\*\*\*\*\* \* \* \*\*\* \*\*\*\* \*\*\*\*\* \*\*\* \*\*

Consensus:

AGTTCGGACAAGAtaTcAcggGAAGcAAAGcaGTCCGAAGaaGGCaCA

>Bacillus\_Fam\_511\_53\_2 Nr. of seq. 2 Alignment length(with gaps) = 53

Alignment score = 0.650943

GCF\_001315085.1\_ASM131508v1\_genomic.fna\_1:106214-106474 Satlength=261 Nr

of Repeats=5 RepeatLength=52 seed=AAAAGGTCAT Num.seqs=5

Similarity=0.828931

0 AAAAGGTCATCATCAAGCTGATGAAGA-CCGAAAGCATCTGGAAAGCTGAGAA

Rev.of\_GCF\_900156865.1\_PRJEB18960\_genomic.fna\_3:3307735-3308723

Satlength=989 Nr of Repeats=18 RepeatLength=52 seed=CCTCTTTCTT

Num.seqs=17 Similarity=0.808069

5 -AGAGGTCNTCATCAAGGTAATGAAGACCCGAAAGCANGTCCACCGCAAAGAA

\* \*\*\*\*\* \* \*\*\*\*\* \*\*\*\*\* \* \* \*\* \*\*\*\*

Consensus:

aAaAGGTCaTCATCAAGcTaATGAAGAcCCGAAAGCATcTccAaaGcAaAGAA

>Bacillus\_Fam\_512\_53\_2 Nr. of seq. 2 Alignment length(with gaps) = 53

Alignment score = 0.628931

GCF\_001420595.1\_ASM142059v1\_genomic.fna\_11:4880278-4880695 Satlength=418

Nr of Repeats=8 RepeatLength=52 seed=GACTTCGGAC Num.seqs=7

Similarity=0.776280

GACTTCGGAC-TTGGTTcAGCTTTTTCTTGTACCTGTCTGAACTCGGGTN

GCF\_900104555.1\_IMG-

taxon\_2651870172\_annotated\_assembly\_genomic.fna\_19:196185-196445

Satlength=261 Nr of Repeats=5 RepeatLength=52 seed=TTcAGACAAT Num.seqs=5

Similarity=0.907692

CCTTTTCCTATCACACCTGTCTGAACTTGGATC

\*\*\*\*\* \*\*\* \* \*\*\*\*\* \* \*\*\*\*\* \*\*\*\*\* \*\* \*

Consensus:

GACTTCaGACaaTcgTTCAGcCTTTTCCTaTcacACCTGTCTGAACTcGGaTc

>Bacillus\_Fam\_513\_53\_2 Nr. of seq. 2 Alignment length(with gaps) = 53

Alignment score = 0.716981

GCF\_001420715.1\_ASM142071v1\_genomic.fna\_24:660131-660443 Satlength=313 Nr

of Repeats=6 RepeatLength=52 seed=GTCCTTCATC Num.seqs=6

Similarity=0.837607

GTCCTTCATCCCTCCGATGAACGACATCTGGAGCTTTTCCTTTTG-CNTTTTT

Rev.of\_GCF\_001636425.1\_ASM163642v1\_genomic.fna\_1:3965800-3966164

Satlength=365 Nr of Repeats=7 RepeatLength=52 seed=GTCCTTCATC Num.seqs=7

Similarity=0.849817

GTCCTTCATCCCNCCGATGAAGGACATCTCANGC-TTCCTCTCGCCCGTTTT

\*\*\*\*\* \*\*\*\*\* \*\*\*\*\* \*\* \*\*\*\*\* \* \* \* \*\*\*\*

Consensus:

GTCCTTCATCCCTCCGATGAACGACATCTcaaGCTTTTCCTcTcGcCcGTTTT

>Bacillus\_Fam\_514\_53\_2 Nr. of seq. 2 Alignment length(with gaps) = 53  
Alignment score = 0.663522  
GCF\_001587375.1\_ASM158737v1\_genomic.fna\_14:64719-64927 Satlength=209 Nr  
of Repeats=4 RepeatLength=52 seed=GTTGTTTCAT Num.seqs=4  
Similarity=0.935897  
0 GTTGTT-TCATCTTCCCGCATCCCTCTGATTGAGCACTTCGCCACTGCTCTC  
Rev.of\_GCF\_001587375.1\_ASM158737v1\_genomic.fna\_105:15709-16177  
Satlength=469 Nr of Repeats=9 RepeatLength=52 seed=AGAGATGCGG Num.seqs=9  
Similarity=0.864672 24 -  
TTCTTCTCATCTTCCCGCATCTCTCGGTTTCGAGCATTTTCGCTGGGGATCCC

\*\*\* \*\* \*\*\*\*\* \*\* \* \*\*\*\*\* \*\*\*\*\* \* \*\* \*  
Consensus:

gTTCtTcTCATCTTCCCGCATCcCTCgGaTTCGAGCAcTTCGCcaccgGaTCcC

>Bacillus\_Fam\_515\_53\_2 Nr. of seq. 2 Alignment length(with gaps) = 53  
Alignment score = 0.613208  
GCF\_001587375.1\_ASM158737v1\_genomic.fna\_44:21063-21635 Satlength=573 Nr  
of Repeats=11 RepeatLength=52 seed=CTCCTTATCT Num.seqs=11  
Similarity=0.748650 0  
CTCCTTATCTTCCCGCATCCGATGCTTGCGGGTAGTTGAGAGGGNGATCTCT-  
GCF\_001587375.1\_ASM158737v1\_genomic.fna\_146:5307-5722 Satlength=416 Nr of  
Repeats=8 RepeatLength=52 seed=TTGCGGGAAC Num.seqs=7 Similarity=0.824498  
25 CTCCTCATCTTCCCGTATCCTATCTTTGCGGGAAC TTCATTCGG-GCTTTCTT

\*\*\*\*\* \*\*\*\*\* \*\* \* \*\*\*\*\* \* \*\* \* \*\* \* \* \*\*  
Consensus:

CTCCTcATCTTCCCGcATCCgATccTTGCGGGaAcTTcAgacGGnGaTcTCTt

>Bacillus\_Fam\_516\_53\_2 Nr. of seq. 2 Alignment length(with gaps) = 53  
Alignment score = 0.622642  
GCF\_001587375.1\_ASM158737v1\_genomic.fna\_83:277-589 Satlength=313 Nr of  
Repeats=6 RepeatLength=52 seed=CGAATGGGAT Num.seqs=6 Similarity=0.810256  
0 CGAATGGGATGGATGCGGGAAC TTG-GAGCAAGAGACCCGAGTTGAAGTGCC  
GCF\_001587375.1\_ASM158737v1\_genomic.fna\_137:57747-58007 Satlength=261 Nr  
of Repeats=5 RepeatLength=52 seed=GAAGCGAAGT Num.seqs=5  
Similarity=0.830769  
39 CGAATCGGCTGGATACGGGAAC TTGATAGTAGGAAAGGTGAAG-CGAAGTGCC

\*\*\*\*\* \*\* \*\*\*\*\* \*\*\*\*\* \*\* \* \*\* \* \* \*\* \*\*\*\*\*  
Consensus:

CGAATcGGaTGATaCGGGAAC TTGagAGcAaGAaAcccGaAGtcGAAGTGCC

>Bacillus\_Fam\_517\_53\_2 Nr. of seq. 2 Alignment length(with gaps) = 53  
Alignment score = 0.647799  
GCF\_001591645.1\_ASM159164v1\_genomic.fna\_3:242834-243042 Satlength=209 Nr  
of Repeats=4 RepeatLength=52 seed=ATTAGTGGA Num.seqs=4  
Similarity=0.776205  
0 ATTAGTGGAATCAGTGAAC TAAACGATCATTTAGAACATATG-AATTCCAGAA



GCF\_001591645.1\_ASM159164v1\_genomic.fna\_13:94849-95106 Satlength=258 Nr of Repeats=5 RepeatLength=52 seed=TTTAGGACAT Num.seqs=4 Similarity=0.700103

29 ACTAGTGGAATTGGTGAACCTAAGTTNGCCTTTAGGACATGNGTATTTCCAGAA

\* \*\*\*\*\* \* \*\*\*\*\* \* \*\*\*\*\* \* \* \*\*\*\*\*

Consensus:

AcTAGTGGAATcaGTGAACTAAacgagCaTTTAGaACATatGtAaTTCCAGAA

>Bacillus\_Fam\_518\_53\_2 Nr. of seq. 2 Alignment length(with gaps) = 53

Alignment score = 0.710692

GCF\_001591805.1\_ASM159180v1\_genomic.fna\_9:77461-77667 Satlength=207 Nr of Repeats=4 RepeatLength=52 seed=TGTCCTTCAT Num.seqs=3 Similarity=0.914530

0 TGTCCCTTCATAAGGGAGATGAAGGACATTTATGTTGG-AAAACAAGAGAGATT

Rev.of GCF\_001420715.1\_ASM142071v1\_genomic.fna\_24:84088-84296

Satlength=209 Nr of Repeats=4 RepeatLength=52 seed=CTTACCAAGA Num.seqs=4

Similarity=0.865828

41

TGTCCTTCATAATGCAGATGAAGGACATTTCTCTTGTAAGTCAGTCGGGATT

\*\*\*\*\* \* \*\*\*\*\* \* \*\*\*\*\* \* \* \*\*\*\*\*

Consensus:

TGTCCTTCATAAgGcAGATGAAGGACATTTaTcTTGGtAAaaCAagaGaGATT

>Bacillus\_Fam\_519\_53\_2 Nr. of seq. 2 Alignment length(with gaps) = 53

Alignment score = 0.672956

GCF\_001636315.1\_ASM163631v1\_genomic.fna\_1:3498555-3498923 Satlength=369

Nr of Repeats=7 RepeatLength=52 seed=GTAACGTAGA Num.seqs=5

Similarity=0.800000

0

GTAACGTAGAGCTCGTCTACGTGCCCCGACCGGA-GTATTTTTTCGCTGTAAGG

GCF\_001636315.1\_ASM163631v1\_genomic.fna\_1:3505767-3506235 Satlength=469

Nr of Repeats=8 RepeatLength=52 seed=GGTAACGTAG Num.seqs=7

Similarity=0.834681

51

GTAACGTAGAGCCCGTCTACGTGCCCCGAAGAGATGGA-AATTTAGCAGTTAGG

\*\*\*\*\* \*\*\*\*\* \*\* \* \* \*\*\* \*\* \*\* \*\*

Consensus:

GTAACGTAGAGCcCGTCTACGTGCCCCGAacaGAtGgAtaaTTTaGCaGTaAGG

>Bacillus\_Fam\_520\_53\_2 Nr. of seq. 2 Alignment length(with gaps) = 53

Alignment score = 0.874214

GCF\_001636345.1\_ASM163634v1\_genomic.fna\_1:3361805-3362988 Satlength=1184

Nr of Repeats=15 RepeatLength=52 seed=TTCTTGAAAT Num.seqs=13

Similarity=0.838952

0

TTCTTGAAATCTGTGGCTTCC-CTNCTTTTCGGGAATGACTCGCCTTGGGGGA

GCF\_001636345.1\_ASM163634v1\_genomic.fna\_1:3809215-3809682 Satlength=468

Nr of Repeats=9 RepeatLength=52 seed=GGAATGACTC Num.seqs=8

Similarity=0.843407

31

TTCTTGAAATCTGTGGCTTCCGCT-CTTTTCGGGAATGACTCGCCTTGGGTCA

\*\*\*\*\* \*\*\*\*\* \* \*\*\*\*\* \*

Consensus:

TTCCTGAAATCTGTGGCTTCCgCTnCTTTTCGGGAATGACTCGCCTTGGGgcA

>Bacillus\_Fam\_521\_53\_2 Nr. of seq. 2 Alignment length(with gaps) = 53  
Alignment score = 0.773585  
GCF\_001648575.1\_ASM164857v1\_genomic.fna\_58:95837-96675 Satlength=839 Nr  
of Repeats=16 RepeatLength=52 seed=CTGTATGACA Num.seqs=13  
Similarity=0.879684 0

CTGTATGACACGCATAATCTTGT-TCCATTAGGATTTTCGCGTTTCATTCGTG  
GCF\_001648575.1\_ASM164857v1\_genomic.fna\_67:84110-84424 Satlength=315 Nr  
of Repeats=6 RepeatLength=52 seed=TCATTCGTGC Num.seqs=4  
Similarity=0.841880

43 CTGTATGACACGCAAAATCATGTCTCC-TTTGAATGTTTCGCGTCTCATTCGTG

\*\*\*\*\* \*\*

Consensus:

CTGTATGACACGCAaATCaGTcTCCaTTaGaATgTTCGCGTcTCATTCGTG

>Bacillus\_Fam\_522\_53\_2 Nr. of seq. 2 Alignment length(with gaps) = 53  
Alignment score = 0.672956  
GCF\_002019605.1\_ASM201960v1\_genomic.fna\_1:4201819-4202236 Satlength=418  
Nr of Repeats=8 RepeatLength=52 seed=GGTAACTATG Num.seqs=7  
Similarity=0.836777 0

GGTAACTATG-AGGCGTTCATAGTGACCAAAGTGAAGTAGAAAAAGCAAGAAC  
GCF\_002019605.1\_ASM201960v1\_genomic.fna\_1:4298572-4298988 Satlength=417  
Nr of Repeats=8 RepeatLength=52 seed=GTGACCGAAC Num.seqs=8  
Similarity=0.847985 21

GGTAACTATGAAAGCG-TCATAGTGACCGAACCCAAAGAGAAAAAGCCAAAGC

\*\*\*\*\* \* \*\*

Consensus:

GGTAACTATGaAaGCGtTCATAGTGACCaAAcccAAagAGAAAAAGCaAaAaC

>Bacillus\_Fam\_523\_53\_2 Nr. of seq. 2 Alignment length(with gaps) = 53  
Alignment score = 0.751572  
GCF\_900107275.1\_IMG-  
taxon\_2675903024\_annotated\_assembly\_genomic.fna\_42:562044-562408  
Satlength=365 Nr of Repeats=7 RepeatLength=52 seed=TGTCCTCAAG Num.seqs=7  
Similarity=0.661654 0

TGTCCTCAAGGAGTGTtTATGAGGACAAACTGGGGTTGGAAGCGTAGTCGAA-  
GCF\_900107275.1\_IMG-  
taxon\_2675903024\_annotated\_assembly\_genomic.fna\_42:623373-623581  
Satlength=209 Nr of Repeats=4 RepeatLength=52 seed=GGACAAACTC Num.seqs=4  
Similarity=0.830189 22

TGTCCTCAAGAAGGGCTTATGAGGACAAACTCGAGTCCGAAGCGTCGGCGAAN

\*\*\*\*\* \*\* \* \*\*\*\*\*

Consensus:

TGTCCTCAAGaAGgGcTTATGAGGACAAACTcGaGTccGAAGCGTaGgCGAAn

>Bacillus\_Fam\_524\_53\_2 Nr. of seq. 2 Alignment length(with gaps) = 53  
Alignment score = 0.855346  
GCF\_900156865.1\_PRJEB18960\_genomic.fna\_3:4352895-4353155 Satlength=261 Nr  
of Repeats=5 RepeatLength=52 seed=AGGTCATCAT Num.seqs=5  
Similarity=0.727273 0  
AGGTCATCATGGAGGTGATGAAGACTC-GAAGCNGTGTGNTTGGTAGNGAAG  
GCF\_900156865.1\_PRJEB18960\_genomic.fna\_3:4347937-4349809 Satlength=1873  
Nr of Repeats=36 RepeatLength=52 seed=GAAGCGGTGT Num.seqs=36  
Similarity=0.899571 28  
AGGTCATCATGGAGGTGATGAAGACTCTGAAGCGGTGTTGCTTGGATGGGAAG

\*\*\*\*\*

Consensus:

AGGTCATCATGGAGGTGATGAAGACTCtGAAGCgGTGTTGcTTGGaaGgGAAG

>Bacillus\_Fam\_525\_53\_2 Nr. of seq. 2 Alignment length(with gaps) = 53  
Alignment score = 1.000000  
GCF\_000153365.1\_ASM15336v1\_genomic.fna\_14:139111-139848 Satlength=738 Nr  
of Repeats=14 RepeatLength=53 seed=CTCTCTTGAG Num.seqs=9  
Similarity=0.849057 0  
CTCTCTTGAGTGACTCATATCGGTTCTCTGAGGCACTCTGGGGCGGGGGGTCT  
GCF\_000473245.1\_ASM47324v1\_genomic.fna\_1:4678509-4679246 Satlength=738 Nr  
of Repeats=14 RepeatLength=53 seed=CTCTCTTGAG Num.seqs=9  
Similarity=0.849057 0  
CTCTCTTGAGTGACTCATATCGGTTCTCTGAGGCACTCTGGGGCGGGGGGTCT

\*\*\*\*\*

Consensus:

CTCTCTTGAGTGACTCATATCGGTTCTCTGAGGCACTCTGGGGCGGGGGGTCT

>Bacillus\_Fam\_526\_53\_2 Nr. of seq. 2 Alignment length(with gaps) = 53  
Alignment score = 0.974843  
GCF\_000153365.1\_ASM15336v1\_genomic.fna\_16:253052-253476 Satlength=425 Nr  
of Repeats=8 RepeatLength=53 seed=GTACAGAGTG Num.seqs=8  
Similarity=0.816799  
0 GTACAGAGTGCCCTCAAACGAAGTCTATGAAGCACTCTAAAGATGGAAAGGAGC  
Rev.of\_GCF\_000473245.1\_ASM47324v1\_genomic.fna\_1:2556644-2557068  
Satlength=425 Nr of Repeats=8 RepeatLength=53 seed=CACTCTGTAC Num.seqs=8  
Similarity=0.809091 10  
GTACAGAGTGCCCTCAAACGAAGTCTATGAAGCACTCTAGAGATGGAAAGGAGC

\*\*\*\*\*

Consensus:

GTACAGAGTGCCCTCAAACGAAGTCTATGAAGCACTCTAaAGATGGAAAGGAGC

>Bacillus\_Fam\_527\_53\_2 Nr. of seq. 2 Alignment length(with gaps) = 53  
Alignment score = 0.943396  
GCF\_000153365.1\_ASM15336v1\_genomic.fna\_67:19007-19908 Satlength=902 Nr of  
Repeats=17 RepeatLength=53 seed=CATGTATCCA Num.seqs=17  
Similarity=0.747950  
0 CATGTATCCAGTAGCTTTTTCGGGATACATGACACCNCNTTTTTTTNCTCGGT



AAATAGCATAAGATAAGCAaGGAATCGTACGCTATAATCTcaAGCCAGTGTAC

>Bacillus\_Fam\_531\_53\_2 Nr. of seq. 2 Alignment length(with gaps) = 53  
Alignment score = 0.811321  
GCF\_000708755.2\_ASM70875v2\_genomic.fna\_2:36778-37043 Satlength=266 Nr of  
Repeats=5 RepeatLength=53 seed=TTGGTTCTAAA Num.seqs=5 Similarity=0.861635  
0 TGGTTCTAAAGCGCGTTAATAGTGCCATCAAAGGGTTGGGGTTGGNAGNTTGA  
GCF\_000709935.2\_ASM70993v2\_genomic.fna\_24:75878-76198 Satlength=321 Nr of  
Repeats=6 RepeatLength=53 seed=TTGATGGTTC Num.seqs=4 Similarity=0.802935  
49 TGGTTCTAAACCGAGTTAATAGTGCCATCAAAGGAGGGGATTGGGAGCTTGA

\*\*\*\*\* \*\* \*\*\*\*\*  
Consensus:

TGGTTCTAAAcCGaGTTAATAGTGCCATCAAAGGaggGGGaTTGGgAGcTTGA

>Bacillus\_Fam\_532\_53\_2 Nr. of seq. 2 Alignment length(with gaps) = 53  
Alignment score = 0.880503  
GCF\_000708755.2\_ASM70875v2\_genomic.fna\_2:902427-902638 Satlength=212 Nr  
of Repeats=4 RepeatLength=53 seed=TGTTGCCACT Num.seqs=3  
Similarity=0.849057  
0 TGTTGCCACTTTACTTCACGCATGGAGCCTGTTTGTGGCGCAACTCACCGGAT  
GCF\_000709935.2\_ASM70993v2\_genomic.fna\_4:157618-157829 Satlength=212 Nr  
of Repeats=4 RepeatLength=53 seed=TGTTTGTGGC Num.seqs=3  
Similarity=0.773585  
29 TGNTGCCACTTTTCTTCACCCATGAAGCCTGTTTGTGGCGCAACTCACCGGAG

\*\* \*\*\*\*\*  
Consensus:

TGtTGCCACTTTaCTTCACcCATGaAGCCTGTTTGTGGCGCAACTCACCGGAg

>Bacillus\_Fam\_533\_53\_2 Nr. of seq. 2 Alignment length(with gaps) = 53  
Alignment score = 0.628931  
GCF\_001439915.1\_ASM143991v1\_genomic.fna\_122:165197-165557 Satlength=361  
Nr of Repeats=6 RepeatLength=53 seed=GCGGTACATG Num.seqs=5  
Similarity=0.771069 0  
GCGGTACATGCTTGGNAGAAATCCGCTTGAGCGTGTAACCGCTAGACCACTCTT  
GCF\_001439915.1\_ASM143991v1\_genomic.fna\_126:34957-35437 Satlength=481 Nr  
of Repeats=9 RepeatLength=53 seed=AAGCGTGTAC Num.seqs=8  
Similarity=0.901168  
28 GCGGTACACGCTCGCAAAAAATTGCCAAAGCGTGTACCGTAAGACGGTTCTA

\*\*\*\*\* \*\*\* \* \* \*\*\*\* \*\*\* \*\*\*\*\* \*\*\*\* \*\*\*  
Consensus:

GCGGTACAcGCTcGcaAaAAATcCGCcaaAGCGTGTACCGcaAGACcactCTa

>Bacillus\_Fam\_534\_52\_2 Nr. of seq. 2 Alignment length(with gaps) = 52  
Alignment score = 0.826923  
GCF\_000169195.2\_ASM16919v2\_genomic.fna\_1:2621330-2621590 Satlength=261 Nr  
of Repeats=5 RepeatLength=52 seed=CAAAAGGACA Num.seqs=5

Similarity=0.615789 0  
CAAAAGGACAATTCAGGNAGAAACAAAGNGCAAATTGTCCTTTANAG-GGTT  
Rev.of\_GCF\_000217835.1\_ASM21783v1\_genomic.fna\_1:2113071-2113331  
Satlength=261 Nr of Repeats=5 RepeatLength=52 seed=TGTCCTTTTG Num.seqs=5  
Similarity=0.648718 10  
CAAAAGGACAATTCGGGNAGAGACAAAGAGCAAACGTTCCTTTAGAGNGGTT

\*\*\*\*\*  
Consensus:

CAAAAGGACAATTCaGGNAGAAaCAAAGaGCAAACGTTCCTTTAgAGnGGTT

>Bacillus\_Fam\_535\_52\_2 Nr. of seq. 2 Alignment length(with gaps) = 52  
Alignment score = 0.743590  
GCF\_000292245.2\_ASM29224v2\_genomic.fna\_25:14121-14376 Satlength=256 Nr of  
Repeats=5 RepeatLength=51 seed=TTTTCATTTAC Num.seqs=5 Similarity=0.746296  
0 TTTTCATTACCTATTAT-CTGCTATTCGCACCCTAATCTTGGCTTTGCTGGC  
GCF\_000292245.2\_ASM29224v2\_genomic.fna\_55:71-275 Satlength=205 Nr of  
Repeats=4 RepeatLength=51 seed=GATTTTCATT Num.seqs=4 Similarity=0.860566  
49 TTTTCATTACCTATTATGAAGGT-TACGCACCCTAACCTTGGCTTTGCTAGA

\*\*\*\*\*  
Consensus:

TTTTTCATTACCTATTATgaaGcTaTaCGCACCTAAcCTTGGCTTTGCTaGa

>Bacillus\_Fam\_536\_52\_2 Nr. of seq. 2 Alignment length(with gaps) = 52  
Alignment score = 0.602564  
GCF\_000292245.2\_ASM29224v2\_genomic.fna\_35:14658-15015 Satlength=358 Nr of  
Repeats=7 RepeatLength=51 seed=GTAATGAAAT Num.seqs=7 Similarity=0.845627  
0 GTAATGAAATTAGNCGACTCACTTGA-TTTCAGTGCCTATTACTCTTTATTG  
GCF\_000292245.2\_ASM29224v2\_genomic.fna\_111:7118-7883 Satlength=766 Nr of  
Repeats=15 RepeatLength=51 seed=GATTGGTAAT Num.seqs=15  
Similarity=0.816247  
46 GTAATGAAATT-CTCGCTTTTCCTGATTTTCATTACCTATTACTCCNGATTG

\*\*\*\*\*  
Consensus:

GTAATGAAATTactCGacTcaCcTGAtTTTCAGTaCcTATTACTCctgATTG

>Bacillus\_Fam\_537\_52\_2 Nr. of seq. 2 Alignment length(with gaps) = 52  
Alignment score = 0.641026  
GCF\_000331575.1\_ASM33157v1\_genomic.fna\_1:73323-73782 Satlength=460 Nr of  
Repeats=9 RepeatLength=51 seed=TCAGCAAATC Num.seqs=9 Similarity=0.947712  
0 TCAGCAAA-TCGCTGAAAAATCCTTTTGTGCTGATAATAAACCGATTTACCA  
GCF\_000331575.1\_ASM33157v1\_genomic.fna\_1:1667305-1667917 Satlength=613 Nr  
of Repeats=12 RepeatLength=51 seed=TTTACTATCA Num.seqs=12  
Similarity=0.857794 44  
TCACCAAAATTCGCT-CTGCGTCCGTTTTGCTGATGATAAATCGGATTTACTA

\*\*\*  
Consensus:

TCACCAAAtTCGCTgaaaaaTCCgTTTTGCTGATaATAAAaCcGATTTACcA

>Bacillus\_Fam\_538\_52\_2 Nr. of seq. 2 Alignment length(with gaps) = 52  
Alignment score = 0.692308  
GCF\_001636335.1\_ASM163633v1\_genomic.fna\_1:405681-405987 Satlength=307 Nr  
of Repeats=6 RepeatLength=51 seed=TTAAGAAGGG Num.seqs=6  
Similarity=0.893682  
0 TTAAGAAGGGTTCAAAACGCCCG-TATTTGTAAAAGAAGGAAAAATTGGTAG  
GCF\_001636335.1\_ASM163633v1\_genomic.fna\_2:334616-334973 Satlength=358 Nr  
of Repeats=7 RepeatLength=51 seed=CGCCCGAAAT Num.seqs=5  
Similarity=0.788462  
17 CCAAGAAGCGTTCATGACGCCCGAAATTTCAAAAAGAA-GAAAAATCGGTAG

\*\*\*\*\*

Consensus:

ccAAGAAGcGTTCAaaACGCCCGaaATTTcaAAAAGAAgGAAAAATcGGTAG

>Bacillus\_Fam\_539\_52\_2 Nr. of seq. 2 Alignment length(with gaps) = 52  
Alignment score = 0.698718  
GCF\_900104555.1\_IMG-  
taxon\_2651870172\_annotated\_assembly\_genomic.fna\_15:150210-151014  
Satlength=805 Nr of Repeats=6 RepeatLength=51 seed=ACTTTTTTCT Num.seqs=5  
Similarity=0.850980 0  
ACTTTTTTCTGGTGATCTACTCGATTTTGTCTTTCAT-AGCNCGGATGAAAG  
GCF\_900104555.1\_IMG-  
taxon\_2651870172\_annotated\_assembly\_genomic.fna\_19:93292-93547  
Satlength=256 Nr of Repeats=5 RepeatLength=51 seed=ATGAAAGACT Num.seqs=5  
Similarity=0.830065 44  
ACTTTTTCCTATTGAACATTTCNATTTTGTCTTCATCAGC-CTCATGAAAG

\*\*\*\*\*

Consensus:

ACTTTTTCCTagTGAAcTAcTCgATTTTGTCCtTCATcAGCnCgcATGAAAG

>Bacillus\_Fam\_540\_52\_2 Nr. of seq. 2 Alignment length(with gaps) = 52  
Alignment score = 1.000000  
GCF\_000153365.1\_ASM15336v1\_genomic.fna\_9:45356-45772 Satlength=417 Nr of  
Repeats=8 RepeatLength=52 seed=AGAGGGTGTT Num.seqs=8 Similarity=0.840659  
0 AGAGGGTGTTAGTGGTAGCGACTAAAGCCGTCTAAGAGAGATTTTGCTAAAC  
GCF\_000473245.1\_ASM47324v1\_genomic.fna\_1:212820-213236 Satlength=417 Nr  
of Repeats=8 RepeatLength=52 seed=AGAGGGTGTT Num.seqs=8  
Similarity=0.840659  
0 AGAGGGTGTTAGTGGTAGCGACTAAAGCCGTCTAAGAGAGATTTTGCTAAAC

\*\*\*\*\*

Consensus:

AGAGGGTGTTAGTGGTAGCGACTAAAGCCGTCTAAGAGAGATTTTGCTAAAC

>Bacillus\_Fam\_541\_52\_2 Nr. of seq. 2 Alignment length(with gaps) = 52  
Alignment score = 1.000000

GCF\_000153365.1\_ASM15336v1\_genomic.fna\_16:445040-445454 Satlength=415 Nr of Repeats=8 RepeatLength=52 seed=AGCCACTATT Num.seqs=6  
Similarity=0.823868  
0 AGCCACTATTTTCATTTTCTTCAGGATAGTGGTCCCAGCTCCTGTGGCTGG  
Rev.of\_GCF\_000473245.1\_ASM47324v1\_genomic.fna\_1:2366668-2367085  
Satlength=418 Nr of Repeats=8 RepeatLength=52 seed=AAAATAGTGG Num.seqs=5  
Similarity=0.795152 12  
AGCCACTATTTTCATTTTCTTCAGGATAGTGGTCCCAGCTCCTGTGGCTGG

\*\*\*\*\*  
Consensus:

AGCCACTATTTTCATTTTCTTCAGGATAGTGGTCCCAGCTCCTGTGGCTGG

>Bacillus\_Fam\_542\_52\_2 Nr. of seq. 2 Alignment length(with gaps) = 52  
Alignment score = 1.000000  
GCF\_000153365.1\_ASM15336v1\_genomic.fna\_60:10538-10746 Satlength=209 Nr of Repeats=4 RepeatLength=52 seed=GAACCGCTAT Num.seqs=4 Similarity=0.811966  
0 GAACCGCTATTTTAGCTTTACACAGAAATAGTGGTCCCAGCGAGCGTGGCTA  
GCF\_000473245.1\_ASM47324v1\_genomic.fna\_1:2054544-2054752 Satlength=209 Nr of Repeats=4 RepeatLength=52 seed=GAACCGCTAT Num.seqs=4  
Similarity=0.811966 0  
GAACCGCTATTTTAGCTTTACACAGAAATAGTGGTCCCAGCGAGCGTGGCTA

\*\*\*\*\*  
Consensus:

GAACCGCTATTTTAGCTTTACACAGAAATAGTGGTCCCAGCGAGCGTGGCTA

>Bacillus\_Fam\_543\_52\_2 Nr. of seq. 2 Alignment length(with gaps) = 52  
Alignment score = 1.000000  
GCF\_000153365.1\_ASM15336v1\_genomic.fna\_74:14504-15024 Satlength=521 Nr of Repeats=10 RepeatLength=52 seed=GTCACTCTAA Num.seqs=10  
Similarity=0.908832  
0 GTCACTCTAACCAAAGAACATAGAATCAGAGTGCCTCAAAAAGAGGATATGA  
GCF\_000473245.1\_ASM47324v1\_genomic.fna\_1:2071154-2071674 Satlength=521 Nr of Repeats=10 RepeatLength=52 seed=GTCACTCTAA Num.seqs=10  
Similarity=0.908832 0  
GTCACTCTAACCAAAGAACATAGAATCAGAGTGCCTCAAAAAGAGGATATGA

\*\*\*\*\*  
Consensus:

GTCACTCTAACCAAAGAACATAGAATCAGAGTGCCTCAAAAAGAGGATATGA

>Bacillus\_Fam\_544\_52\_2 Nr. of seq. 2 Alignment length(with gaps) = 52  
Alignment score = 1.000000  
GCF\_000153365.1\_ASM15336v1\_genomic.fna\_74:34309-34724 Satlength=416 Nr of Repeats=7 RepeatLength=52 seed=AAATCAGAGG Num.seqs=6 Similarity=0.894017  
0 AAATCAGAGGGCCTCAAACGAGCGAAATGGAACCTCTAAACTGAAATAATC  
GCF\_000473245.1\_ASM47324v1\_genomic.fna\_1:2090960-2091375 Satlength=416 Nr of Repeats=7 RepeatLength=52 seed=AAATCAGAGG Num.seqs=6  
Similarity=0.894017 0  
AAATCAGAGGGCCTCAAACGAGCGAAATGGAACCTCTAAACTGAAATAATC



\*\*\*\*\*

Consensus:

AAATCAGAGGGCCTCAAACGAGCGAAATGGAACCTCTAAACTGAAATAATC

>Bacillus\_Fam\_545\_52\_2 Nr. of seq. 2 Alignment length(with gaps) = 52

Alignment score = 0.820513

GCF\_000177235.2\_ASM17723v2\_genomic.fna\_1:494305-494982 Satlength=678 Nr

of Repeats=13 RepeatLength=52 seed=ACTCTATTTC Num.seqs=12

Similarity=0.894716

0

ACTCTATTTTCGGACAGAGTTTCTTGTTTAATATTCAACTCTGTCCGATTGCA

GCF\_000177235.2\_ASM17723v2\_genomic.fna\_1:4603616-4604344 Satlength=729 Nr

of Repeats=14 RepeatLength=52 seed=ATTGCTTCTC Num.seqs=14

Similarity=0.915187

46

TCTCTTTTTCGGACAGAGTTCCTTGTTTCAATTATTCAACTCTGTCTGATTGCT

\*\*\*\* \*\*\*\*\* \* \*\*\*\*\*

Consensus:

aCTCTaTTTCGGACAGAGTTcCTTGTTcAaTATTCAACTCTGTCCGATTGCa

>Bacillus\_Fam\_546\_52\_2 Nr. of seq. 2 Alignment length(with gaps) = 52

Alignment score = 0.801282

GCF\_000177235.2\_ASM17723v2\_genomic.fna\_1:2323006-2323553 Satlength=548 Nr

of Repeats=10 RepeatLength=52 seed=AAGGTCATCA Num.seqs=9

Similarity=0.859687

0

AAGGTCATCATACGAAGTCTATGCTACCCGAAAAATNGAAACCGAGCAGATG

GCF\_000177235.2\_ASM17723v2\_genomic.fna\_1:2835835-2836198 Satlength=364 Nr

of Repeats=5 RepeatLength=52 seed=AAGGGCAGCA Num.seqs=3

Similarity=0.880342

0

AAGGGCAGCATACGAAGCCTATGCCTCCCGAAAAAATGAAATCGAGCAGATG

\*\*\*\* \* \*\*\*\*\* \*\*\*\*\* \*\*\*\*\*

Consensus:

AAGGgCagCATACGAAGcCTATGCcaCCCGAAAAAatGAAAcCGAGCAGATG

>Bacillus\_Fam\_547\_52\_2 Nr. of seq. 2 Alignment length(with gaps) = 52

Alignment score = 0.878205

GCF\_000177235.2\_ASM17723v2\_genomic.fna\_1:4408835-4409251 Satlength=417 Nr

of Repeats=8 RepeatLength=52 seed=CGCTATGATT Num.seqs=8

Similarity=0.869048

0

CGCTATGATTACCTTCAACTCATTTTGGGCTCGTTCTCGGGAAGCATACAAT

GCF\_000177235.2\_ASM17723v2\_genomic.fna\_1:4410749-4411009 Satlength=261 Nr

of Repeats=5 RepeatLength=52 seed=CTATGATTAC Num.seqs=5

Similarity=0.817949

2

CGCTATGATTACCGTCAACTCATTTTGGGCTCNCTCTCGGGAAGCATACACG

\*\*\*\*\* \*\*\*\*\* \*\*\*\*\*

Consensus:

CGCTATGATTACCGTCAACTCATTTTGGGCTCgcTCTCGGGAAGCATACAag

>Bacillus\_Fam\_548\_52\_2 Nr. of seq. 2 Alignment length(with gaps) = 52  
Alignment score = 0.955128  
GCF\_000186145.1\_Bacillus\_sp\_2\_A\_57\_CT2\_V1\_genomic.fna\_4:260068-260380  
Satlength=313 Nr of Repeats=6 RepeatLength=52 seed=GTTCAGACAG Num.seqs=6  
Similarity=0.890356 0  
GTTCAGACAGGAAGAACGAGAAATAGCCTGTTTGTGTCCGAAGAAGGGGCAG  
Rev.of\_GCF\_000294775.2\_ASM29477v2\_genomic.fna\_1:3372157-3372521  
Satlength=365 Nr of Repeats=7 RepeatLength=52 seed=TCTTCGGACA Num.seqs=7  
Similarity=0.864469 44  
GTTCAGACAGGAAGAACGAGAAATAGNCTGTTTGTGTCCGAAGACGGGGCAG

\*\*\*\*\*

Consensus:

GTTCAGACAGGAAGAACGAGAAATAGcCTGTTTGTGTCCGAAGaAGGGGCAG

>Bacillus\_Fam\_549\_52\_2 Nr. of seq. 2 Alignment length(with gaps) = 52  
Alignment score = 0.910256  
GCF\_000186145.1\_Bacillus\_sp\_2\_A\_57\_CT2\_V1\_genomic.fna\_5:20059-20318  
Satlength=260 Nr of Repeats=5 RepeatLength=52 seed=TGGGAGTTAA Num.seqs=4  
Similarity=0.816239 0  
TGGGAGTTAACCAAAGGGAATAAAGCCGAAATCCCAGAGCCAGCCAACAAAA  
Rev.of\_GCF\_000294775.2\_ASM29477v2\_genomic.fna\_1:2910855-2911062  
Satlength=208 Nr of Repeats=4 RepeatLength=52 seed=CTCCCATTTT Num.seqs=3  
Similarity=0.811966 6  
TGGGAGTTAATCAAANGGAATAAAGNCGAAATCCCAGAGCAAGCCAACAAAA

\*\*\*\*\*

Consensus:

TGGGAGTTAAcCAAAGGGAATAAAGcCGAAATCCCAGAGCaAGCCAACAAAA

>Bacillus\_Fam\_550\_52\_2 Nr. of seq. 2 Alignment length(with gaps) = 52  
Alignment score = 0.974359  
GCF\_000186145.1\_Bacillus\_sp\_2\_A\_57\_CT2\_V1\_genomic.fna\_5:39414-39827  
Satlength=414 Nr of Repeats=8 RepeatLength=52 seed=GTCGCCATAA Num.seqs=5  
Similarity=0.858974 0  
GTCGCCATAAGAGGTTTCATGACGACGAAAAATTGGAGGTCCAAGTAAAAACA  
Rev.of\_GCF\_000294775.2\_ASM29477v2\_genomic.fna\_1:2898257-2898722  
Satlength=466 Nr of Repeats=9 RepeatLength=52 seed=TTATGGCGAC Num.seqs=6  
Similarity=0.825641 10  
GTCGCCATAAGAGGTTTCATGACGACGAAAAATTGGAGGTCCAAGTAAAAACG

\*\*\*\*\*

Consensus:

GTCGCCATAAGAGGTTTCATGACGACGAAAAATTGGAGGTCCAAGTAAAAACa

>Bacillus\_Fam\_551\_52\_2 Nr. of seq. 2 Alignment length(with gaps) = 52  
Alignment score = 0.923077  
GCF\_000186145.1\_Bacillus\_sp\_2\_A\_57\_CT2\_V1\_genomic.fna\_5:358104-358520  
Satlength=417 Nr of Repeats=7 RepeatLength=52 seed=TTCGGACTCA Num.seqs=6  
Similarity=0.822222 0  
TTCGGACTCAACGACCATCCGTTTCGCGGTTTTGAGTCCGAACACCAGTCAAC

Rev.of\_GCF\_000294775.2\_ASM29477v2\_genomic.fna\_1:2554186-2554498  
Satlength=313 Nr of Repeats=5 RepeatLength=52 seed=TGAGTCCGAA Num.seqs=4  
Similarity=0.747379 10  
TTCGGACTCAGCGAGCATCCGTTTCGCGGTTTTGTGTCCGAACACCAGTCAAC

\*\*\*\*\*  
Consensus:

TTCGGACTCAaCGAcCATCCGTTTCGCGGTTTTGaGTCCGAACACCAGTCAAC

>Bacillus\_Fam\_552\_52\_2 Nr. of seq. 2 Alignment length(with gaps) = 52  
Alignment score = 0.974359  
GCF\_000186145.1\_Bacillus\_sp\_2\_A\_57\_CT2\_V1\_genomic.fna\_6:198141-198401  
Satlength=261 Nr of Repeats=5 RepeatLength=52 seed=CATGAAATAT Num.seqs=5  
Similarity=0.816352 0  
CATGAAATATGGGAGTTAATTCTAATCATTATCGACCAAACAAGAGATGCCA  
Rev.of\_GCF\_000294775.2\_ASM29477v2\_genomic.fna\_1:899649-899960  
Satlength=312 Nr of Repeats=6 RepeatLength=52 seed=TAATCCCAT Num.seqs=5  
Similarity=0.871795 18  
CATGAAATATGGGAGTTAATCCTAATCATTATCGACCAAACAAGAGATGCCA

\*\*\*\*\*  
Consensus:

CATGAAATATGGGAGTTAATcCTAATCATTATCGACCAAACAAGAGATGCCA

>Bacillus\_Fam\_553\_52\_2 Nr. of seq. 2 Alignment length(with gaps) = 52  
Alignment score = 0.948718  
GCF\_000186145.1\_Bacillus\_sp\_2\_A\_57\_CT2\_V1\_genomic.fna\_7:64235-64495  
Satlength=261 Nr of Repeats=5 RepeatLength=52 seed=CACCTTCGGA Num.seqs=5  
Similarity=0.844025 0  
CACCTTCGGACTCGCTCACGTTGATTTCTCCCTTTCTGTCCGAACCTGCTC  
Rev.of\_GCF\_000294775.2\_ASM29477v2\_genomic.fna\_1:658243-658659  
Satlength=417 Nr of Repeats=8 RepeatLength=52 seed=GAGTCCGAAG Num.seqs=8  
Similarity=0.829739 13  
CACCTTCGGACTCGCTCACGTTGATTTCTCCCTTTCTGTCCGAACCTCCTC

\*\*\*\*\*  
Consensus:

CACCTTCGGACTCGCTCACGTTGATTTCTCCcTTTCTGTCCGAACCTcCTC

>Bacillus\_Fam\_554\_52\_2 Nr. of seq. 2 Alignment length(with gaps) = 52  
Alignment score = 0.897436  
GCF\_000285535.1\_ASM28553v1\_genomic.fna\_2:1010386-1010802 Satlength=417 Nr  
of Repeats=8 RepeatLength=52 seed=TCCTCTTCAT Num.seqs=8  
Similarity=0.735175 0  
TCCTCTTCATAAGCCCCGTGAAGAGGAAACGTAACCAAAATCTCATTCTTTT  
Rev.of\_GCF\_000285535.1\_ASM28553v1\_genomic.fna\_45:36-244 Satlength=209 Nr  
of Repeats=4 RepeatLength=52 seed=AAGAGGAAAA Num.seqs=4  
Similarity=0.794872  
7 TCCTCTTCATAAGCTTCGTGAAGGGGAAACGTAACCAAAATCTCATTCTTTT

\*\*\*\*\*

Consensus:

TCCTCTTCATAAGCccCGTGAAGaGGAAACGTAACCAAAATCTCATTCcTTT

>Bacillus\_Fam\_555\_52\_2 Nr. of seq. 2 Alignment length(with gaps) = 52  
Alignment score = 0.820513  
GCF\_000285535.1\_ASM28553v1\_genomic.fna\_3:290400-290816 Satlength=417 Nr of Repeats=8 RepeatLength=52 seed=TGAAGAGGAT Num.seqs=8 Similarity=0.851648  
0 TGAAGAGGATTACAAGCTTATGTTTCGTCCTTCCTCTTCATCTAGGCTT  
GCF\_000285535.1\_ASM28553v1\_genomic.fna\_41:8-216 Satlength=209 Nr of Repeats=4 RepeatLength=52 seed=TGAAGAGGAT Num.seqs=4 Similarity=0.846154  
0 TGAAGAGGATTACAGGCTTCAATTCCTCCCACTTTCTCTTCATCTAGGCTA

\*\*\*\*\*

Consensus:

TGAAGAGGATTACAaGCTTaaATTcTCCCaCTTCTCTTCATCTAGGCTa

>Bacillus\_Fam\_556\_52\_2 Nr. of seq. 2 Alignment length(with gaps) = 52  
Alignment score = 0.692308  
GCF\_000307875.1\_BABA1.0\_genomic.fna\_34:24055-24262 Satlength=208 Nr of Repeats=4 RepeatLength=52 seed=TGTCCTCAAT Num.seqs=3 Similarity=0.811966  
0 TGTCCTCAATAAGGGCTATTGAGGACAAAACCTCGCTGGATAGCAGGAAAAA  
GCF\_001591665.1\_ASM159166v1\_genomic.fna\_21:148942-149150 Satlength=209 Nr of Repeats=4 RepeatLength=52 seed=GCTCTTAAAG Num.seqs=4 Similarity=0.846154 14  
TGTCTTTAATAAGGGCTCTTAAAGACAAAACCTCCGCGGAAAGCAATCAAAA

\*\*\*\* \* \*\*\*\*\* \*\* \* \*\*\*\*\* \* \*\*\* \*\*\*\*

Consensus:

TGTcCTcAATAAGGGCTaTTaAaGACAAAACCTCccCgGGaAGCAagaAAAA

>Bacillus\_Fam\_557\_52\_2 Nr. of seq. 2 Alignment length(with gaps) = 52  
Alignment score = 0.628205  
GCF\_000311725.1\_ASM31172v1\_genomic.fna\_4:30876-31291 Satlength=416 Nr of Repeats=8 RepeatLength=52 seed=ATTCGGACTC Num.seqs=7 Similarity=0.783550  
0 ATTCGGACTCCCTTNCNCCTTTTCCTGCTCGACCTGTCCGAATCCCCTTCT  
GCF\_000311725.1\_ASM31172v1\_genomic.fna\_6:46056-46316 Satlength=261 Nr of Repeats=5 RepeatLength=52 seed=TCTATTCGGA Num.seqs=5 Similarity=0.887179  
49 ATTCGGACTTACTTATTTGTTTTACAGCTTGGGCTGTCCGAATAGCCCCTCT

\*\*\*\*\* \*\*\* \*\*\*\*\* \* \*\*\* \* \*\*\*\*\* \*\*\* \*\*

Consensus:

ATTCGGACTcaCTTactccTTTTaCaGCTcGacCTGTCCGAATaCCCCtCT

>Bacillus\_Fam\_558\_52\_2 Nr. of seq. 2 Alignment length(with gaps) = 52  
Alignment score = 0.641026  
GCF\_000374345.1\_ASM37434v1\_genomic.fna\_5:87235-87443 Satlength=209 Nr of Repeats=4 RepeatLength=52 seed=GGCTTTTCATC Num.seqs=4 Similarity=0.905983  
0 GGCTTTTCATCCCCTTTATGAGCGACCATAACCGATGTGTTTTACCATGGCAGC

GCF\_000374345.1\_ASM37434v1\_genomic.fna\_49:17746-17954 Satlength=209 Nr of Repeats=4 RepeatLength=52 seed=CCTATGTGTT Num.seqs=4 Similarity=0.876068  
29 GGCGGTCATTCCCCTTATGAACGACCGTGCTATGTGTTTTTCATTCTCGCG

\*\*\* \*\*\*\* \* \*\*\*\*\* \* \* \* \* \*

Consensus:

GGCggTCATcCCCcTTATGAaCGACCaTaCCgATGTGTTTTaCaaTcgCaCG

>Bacillus\_Fam\_559\_52\_2 Nr. of seq. 2 Alignment length(with gaps) = 52  
Alignment score = 0.666667

GCF\_000374345.1\_ASM37434v1\_genomic.fna\_8:79176-79540 Satlength=365 Nr of Repeats=7 RepeatLength=52 seed=AATCAAACGG Num.seqs=7 Similarity=0.796047  
0 AATCAAACGGTCGCTCATCCCCTTTATGAACGCCGCGCCTGCTGAGTTTTT  
GCF\_000374345.1\_ASM37434v1\_genomic.fna\_9:12991-13459 Satlength=469 Nr of Repeats=8 RepeatLength=52 seed=TCACACGGTC Num.seqs=7 Similarity=0.789988  
2 AATCACACGGTCGATCATTTCCCTTATGAACGACCACGCCGCTGAAAATCC

\*\*\*\*\* \* \* \* \* \*

Consensus:

AATCAaACGGTCGaTCATccCCcTTATGAACGaCCaCGCCgGCTGAaaaTcc

>Bacillus\_Fam\_560\_52\_2 Nr. of seq. 2 Alignment length(with gaps) = 52  
Alignment score = 0.724359

GCF\_000374565.1\_ASM37456v1\_genomic.fna\_1:698811-699383 Satlength=573 Nr of Repeats=11 RepeatLength=52 seed=ATTAGTGACC Num.seqs=11  
Similarity=0.762851  
ATTAGTGACCGTTATCCGGGATTTTNCCTAAATACGGGTACCTTTTACTGCT  
Rev.of\_GCF\_000374565.1\_ASM37456v1\_genomic.fna\_3:262427-263155  
Satlength=729 Nr of Repeats=14 RepeatLength=52 seed=GGTCACTAAT  
Num.seqs=14 Similarity=0.765004  
10 ATTAGTGACCGAGCTACGGGATTTACCGTAAATACGGGAACCTTTTGCCGCG

0

\*\*\*\*\* \* \* \* \* \*

Consensus:

ATTAGTGACCGagaTaCGGGATTTacCctAAATACGGGaACCTTTTaCcGCg

>Bacillus\_Fam\_561\_52\_2 Nr. of seq. 2 Alignment length(with gaps) = 52  
Alignment score = 0.615385

GCF\_000374565.1\_ASM37456v1\_genomic.fna\_29:5643-6006 Satlength=364 Nr of Repeats=7 RepeatLength=52 seed=TTAGTTACCG Num.seqs=6 Similarity=0.733333  
0 TTAGTTACCGTTTTTCGCACTTAAACCCGTATTCGGGCACCTTTCCCCGCGA  
Rev.of\_GCF\_000374565.1\_ASM37456v1\_genomic.fna\_32:3468-3780 Satlength=313  
Nr of Repeats=6 RepeatLength=52 seed=CCCGAAAAAG Num.seqs=6  
Similarity=0.814675  
TTAGTGACCGTTTTCCCTCTCGGACGCTTTTTCGGGCACTATTACTCTCGA

37

\*\*\*\*\* \* \* \* \* \*

Consensus:

TTAGTgACCGgTTTTCCcCaCTcaaACcCgTaTTCGGGCACcaTTaCcCgCGA

>Bacillus\_Fam\_562\_52\_2 Nr. of seq. 2 Alignment length(with gaps) = 52  
Alignment score = 0.910256  
GCF\_000708755.2\_ASM70875v2\_genomic.fna\_1:24282-24750 Satlength=469 Nr of  
Repeats=8 RepeatLength=52 seed=CAGAAAATCA Num.seqs=7 Similarity=0.840049  
0 CAGAAAATCAGATTTGATGGCACTGAACATTGAGAATAGNACCACCAACGAA  
GCF\_000709935.2\_ASM70993v2\_genomic.fna\_1:24497-24861 Satlength=365 Nr of  
Repeats=7 RepeatLength=52 seed=GATGGCACTG Num.seqs=7 Similarity=0.796646  
15 CAGANAATCAGTTTTGATGGCACTGAACATCGAGAATAGGACCACCAACGAA

\*\*\*\*  
Consensus:

CAGAAATCAGaTTTGTATGGCACTGAACATcGAGAATAGgACCACCAACGAA

>Bacillus\_Fam\_563\_52\_2 Nr. of seq. 2 Alignment length(with gaps) = 52  
Alignment score = 1.000000  
GCF\_000708755.2\_ASM70875v2\_genomic.fna\_1:149824-150187 Satlength=364 Nr  
of Repeats=7 RepeatLength=52 seed=TGAAAGTGTT Num.seqs=6  
Similarity=0.926496  
0 TGAAAGTGTTGCTAACCCAGTTTAAGAACAACCTTTTCCGCAGAGCAGAAGGGT  
GCF\_000709935.2\_ASM70993v2\_genomic.fna\_1:150814-151022 Satlength=209 Nr  
of Repeats=4 RepeatLength=52 seed=TTGAAAGTGT Num.seqs=4  
Similarity=0.893162  
51 TGAAAGTGTTGCTAACCCAGTTTAAGAACAACCTTTTCCGCAGAGCAGAAGGGT

\*\*\*\*\*  
Consensus:

TGAAAGTGTTGCTAACCCAGTTTAAGAACAACCTTTTCCGCAGAGCAGAAGGGT

>Bacillus\_Fam\_564\_52\_2 Nr. of seq. 2 Alignment length(with gaps) = 52  
Alignment score = 0.980769  
GCF\_000708755.2\_ASM70875v2\_genomic.fna\_1:165249-165509 Satlength=261 Nr  
of Repeats=5 RepeatLength=52 seed=TGATGTGAAG Num.seqs=5  
Similarity=0.771795  
0 TGATGTGAAGGGTTATAAGTAAGTGAGAATTGACCCCTNAGTGCAGCCGTAG  
GCF\_000709935.2\_ASM70993v2\_genomic.fna\_1:166061-166321 Satlength=261 Nr  
of Repeats=5 RepeatLength=52 seed=TGATGTGAAG Num.seqs=5  
Similarity=0.771795  
0 TGATGTGAAGGGTTATAAGTAAGTGAGAATTGACCCCTNAGTGCAGCCGTAG

\*\*\*\*\*  
Consensus:

TGATGTGAAGGGTTATAAGTAAGTGAGAATTGACCCCTNAGTGCAGCCGTAG

>Bacillus\_Fam\_565\_52\_2 Nr. of seq. 2 Alignment length(with gaps) = 52  
Alignment score = 0.974359  
GCF\_000708755.2\_ASM70875v2\_genomic.fna\_1:230141-230557 Satlength=417 Nr  
of Repeats=8 RepeatLength=52 seed=GTGAATGAAC Num.seqs=8  
Similarity=0.861722  
0 GTGAATGAACCCTTCGTACGAAGAATCAGGAGCTGAAGGGTCAAAAGGCGTC  
GCF\_000709935.2\_ASM70993v2\_genomic.fna\_1:229818-230026 Satlength=209 Nr  
of Repeats=4 RepeatLength=52 seed=GTGAATGAAC Num.seqs=4

Similarity=0.858974

0 GTGAATGAACCCTTCATACGAAGAATCAGGAGCTGAAGGGTCAAAAGGCGTC

\*\*\*\*\*

Consensus:

GTGAATGAACCCTTCaTACGAAGAATCAGGAGCTGAAGGGTCAAAAGGCGTC

>Bacillus\_Fam\_566\_52\_2 Nr. of seq. 2 Alignment length(with gaps) = 52

Alignment score = 1.000000

GCF\_000708755.2\_ASM70875v2\_genomic.fna\_2:776717-776977 Satlength=261 Nr

of Repeats=5 RepeatLength=52 seed=CATGAAGGGT Num.seqs=5

Similarity=0.897436

0 CATGAAGGGTCATATCATGCTCGCTTATGACCACTCAGCTCACCCCTGCCCTG

GCF\_000709935.2\_ASM70993v2\_genomic.fna\_4:32363-32675 Satlength=313 Nr of

Repeats=6 RepeatLength=52 seed=GCATGAAGGG Num.seqs=6 Similarity=0.912821

51 CATGAAGGGTCATATCATGCTCGCTTATGACCACTCAGCTCACCCCTGCCCTG

\*\*\*\*\*

Consensus:

CATGAAGGGTCATATCATGCTCGCTTATGACCACTCAGCTCACCCCTGCCCTG

>Bacillus\_Fam\_567\_52\_2 Nr. of seq. 2 Alignment length(with gaps) = 52

Alignment score = 0.826923

GCF\_000708755.2\_ASM70875v2\_genomic.fna\_5:240351-240559 Satlength=209 Nr

of Repeats=4 RepeatLength=52 seed=CAGGTTTAAAG Num.seqs=4

Similarity=0.901709

0 CAGGTTTAAAGAGCACAAACGTGTCTACCCAGCTAAGAGTTTGTGCTGCAAAC

GCF\_000709935.2\_ASM70993v2\_genomic.fna\_13:174173-174383 Satlength=211 Nr

of Repeats=4 RepeatLength=52 seed=AGTTTGTGCT Num.seqs=3

Similarity=0.786325

36 AAGGTTTAAAGAGCACTAACGCGTCTTCCCAGANAAGAGTTTGTGCTGCTAAC

\*\*\*\*\*

Consensus:

aAGGTTTAAAGAGCACaAACGcGTCTaCCCAGatAAGAGTTTGTGCTGCaAAC

>Bacillus\_Fam\_568\_52\_2 Nr. of seq. 2 Alignment length(with gaps) = 52

Alignment score = 0.948718

GCF\_000708755.2\_ASM70875v2\_genomic.fna\_6:356690-356898 Satlength=209 Nr

of Repeats=4 RepeatLength=52 seed=TCTTACCCTC Num.seqs=4

Similarity=0.811966

0 TCTTACCCTCCCAAACCGTTATTCGATCTGACAGGGTAAGCAAACCTACGTT

GCF\_000709935.2\_ASM70993v2\_genomic.fna\_5:562744-562952 Satlength=209 Nr

of Repeats=4 RepeatLength=52 seed=TCTTACCCTC Num.seqs=4

Similarity=0.803419

0 TCTTACCCTCCCAAACCGTTATTCGATCTGACAGGGCAAGCAAACCTACTTT

\*\*\*\*\*

Consensus:

TCTTACCCTCCCAAACCGTTATTCGATCTGACAGGGcAAGCAAACCTACgTT

>Bacillus\_Fam\_569\_52\_2 Nr. of seq. 2 Alignment length(with gaps) = 52  
Alignment score = 0.897436  
GCF\_000708755.2\_ASM70875v2\_genomic.fna\_7:38513-38773 Satlength=261 Nr of  
Repeats=5 RepeatLength=52 seed=AAGTGTCTT Num.seqs=5 Similarity=0.820513  
0 AAGTGTCTTAACCTGGGTTAGCAACACAACTTTGTTGATTGTTCACTGGA  
GCF\_000709935.2\_ASM70993v2\_genomic.fna\_19:41278-41486 Satlength=209 Nr of  
Repeats=4 RepeatLength=52 seed=GGAAAGTGTT Num.seqs=4 Similarity=0.820513  
49 AAGTGTCTTAATCTGAGTTAGCAACACAACTCTGTTGATCGTTCACTGGA

\*\*\*\*\* \*\*\* \*\*\*\*\*

Consensus:

AAGTGTCTTAACCTGaGTTAGCAACACAACTcTGTGATcGTTCACTGGA

>Bacillus\_Fam\_570\_52\_2 Nr. of seq. 2 Alignment length(with gaps) = 52  
Alignment score = 0.794872  
GCF\_000708755.2\_ASM70875v2\_genomic.fna\_7:121702-121910 Satlength=209 Nr  
of Repeats=4 RepeatLength=52 seed=TTGATGGTTC Num.seqs=4  
Similarity=0.905983  
0 TTGATGGTCTTATAAGCCCGATAAGTACCACCAAACCTCTGATTCCCTTGAA  
Rev.of\_GCF\_000708755.2\_ASM70875v2\_genomic.fna\_22:145264-145525  
Satlength=262 Nr of Repeats=5 RepeatLength=52 seed=TAAGAACCAT Num.seqs=4  
Similarity=0.747863 13  
TTGATGGTCTTATAAGCCCGATAAGTGCCATCAACCTCTGAGTTTTTTGGA

\*\*\*\*\* \*\*\*\*\* \* \* \* \*

Consensus:

TTGATGGTCTTATAAGCCCGATAAGTaCCAcCAAACTCTGAgTcccTTGaA

>Bacillus\_Fam\_571\_52\_2 Nr. of seq. 2 Alignment length(with gaps) = 52  
Alignment score = 0.948718  
GCF\_000708755.2\_ASM70875v2\_genomic.fna\_22:151396-151604 Satlength=209 Nr  
of Repeats=4 RepeatLength=52 seed=GAAGGTCACA Num.seqs=4  
Similarity=0.846154  
0 GAAGGTCACAAAACAGGAAGGAATGTGCCCTTCGTGAAGTGTTCCAAGGTGT  
GCF\_000709935.2\_ASM70993v2\_genomic.fna\_24:262239-262603 Satlength=365 Nr  
of Repeats=7 RepeatLength=52 seed=GAAGGTCACA Num.seqs=7  
Similarity=0.851038  
0 GAAGGTCACAAAACGGAAGGAATGTGCCCTTCGTGAAGTGTTCCAAGATGT

\*\*\*\*\* \*\*\*\*\*

Consensus:

GAAGGTCACAAAACaGGAAGGAATGTGCCCTTCGTGAAGTGTTCCAAGaTGT

>Bacillus\_Fam\_572\_52\_2 Nr. of seq. 2 Alignment length(with gaps) = 52  
Alignment score = 1.000000  
GCF\_000708755.2\_ASM70875v2\_genomic.fna\_22:158758-159018 Satlength=261 Nr  
of Repeats=5 RepeatLength=52 seed=GGAAAGTGTT Num.seqs=5  
Similarity=0.779487  
0 GGAAAGTGTTCTAAAAAGGGTTTAGCAACATTAACCCTGGCTGGAGAAGAGA



GCF\_000709935.2\_ASM70993v2\_genomic.fna\_24:269755-270118 Satlength=364 Nr of Repeats=7 RepeatLength=52 seed=GGAAAAGTGTT Num.seqs=6 Similarity=0.832479  
0 GGAAAAGTGTTCTAAAAAGGGTTTAGCAACATTAACCCTGGCTGGAGAAGAGA

\*\*\*\*\*  
Consensus:

GGAAAAGTGTTCTAAAAAGGGTTTAGCAACATTAACCCTGGCTGGAGAAGAGA

>Bacillus\_Fam\_573\_52\_2 Nr. of seq. 2 Alignment length(with gaps) = 52 Alignment score = 1.000000  
GCF\_000708755.2\_ASM70875v2\_genomic.fna\_22:241123-241383 Satlength=261 Nr of Repeats=5 RepeatLength=52 seed=TGAAAAGGTCA Num.seqs=5 Similarity=0.866667  
0 TGAAAAGGTCAATAAGCGGAAGGATAAGACCCTTTATCAAAGCTGGTCCGCCG  
GCF\_000709935.2\_ASM70993v2\_genomic.fna\_24:352189-352449 Satlength=261 Nr of Repeats=5 RepeatLength=52 seed=TGAAAAGGTCA Num.seqs=5 Similarity=0.866667  
0 TGAAAAGGTCAATAAGCGGAAGGATAAGACCCTTTATCAAAGCTGGTCCGCCG

\*\*\*\*\*  
Consensus:

TGAAAAGGTCAATAAGCGGAAGGATAAGACCCTTTATCAAAGCTGGTCCGCCG

>Bacillus\_Fam\_574\_52\_2 Nr. of seq. 2 Alignment length(with gaps) = 52 Alignment score = 0.641026  
GCF\_000787375.1\_ASM78737v1\_genomic.fna\_3:77617-77929 Satlength=313 Nr of Repeats=6 RepeatLength=52 seed=CTTTGACTCC Num.seqs=6 Similarity=0.735867  
0 CTTTGACTCCCGTTCTCGGGCTTCCTCCAACCTTCGGGTGCCATCCCCTTC  
GCF\_000787375.1\_ASM78737v1\_genomic.fna\_4:23329-23745 Satlength=417 Nr of Repeats=6 RepeatLength=52 seed=TCTTTCTGCT Num.seqs=4 Similarity=0.863248  
13 CTTTGACTACCGGTCTTTCTGCTTCCTCTCGTTTCGGTAGTCAACCCCTTC

\*\*\*\*\* \* \* \* \* \*  
Consensus:

CTTTGACTaCCGgTCTcgcgGCTTCCTCcaacTTTCGGGaGcCAaCCCCCTTC

>Bacillus\_Fam\_575\_52\_2 Nr. of seq. 2 Alignment length(with gaps) = 52 Alignment score = 0.910256  
GCF\_000934845.1\_ASM93484v1\_genomic.fna\_81:9-269 Satlength=261 Nr of Repeats=5 RepeatLength=52 seed=AATCTCCACA Num.seqs=5 Similarity=0.815385  
0 AATCTCCACATACTGGAAAATCGTAGTCCCAATCAGCCCTATTGGTGCTCCN  
Rev.of\_GCF\_000934845.1\_ASM93484v1\_genomic.fna\_105:32-292 Satlength=261 Nr of Repeats=5 RepeatLength=52 seed=TATGTGGAGA Num.seqs=5 Similarity=0.762963  
AATCTCCACATACTGGTAAATCNTAGTCCCAATAAGCCCTATTGGTGCTCCG

12

\*\*\*\*\*  
Consensus:

AATCTCCACATACTGGaAAATCgTAGTCCCAATaAGCCCTATTGGTGCTCCg

>Bacillus\_Fam\_576\_52\_2 Nr. of seq. 2 Alignment length(with gaps) = 52  
Alignment score = 0.974359  
GCF\_000986785.1\_ASM98678v1\_genomic.fna\_3:238264-238524 Satlength=261 Nr  
of Repeats=5 RepeatLength=52 seed=GGGCCTCCAT Num.seqs=5  
Similarity=0.876730  
0 GGGCCTCCATCAGGGCGATGGACGACCGTTTATTGCTCAATCTCAGGTTTCA  
Rev.of\_GCF\_000986785.1\_ASM98678v1\_genomic.fna\_6:203684-203891  
Satlength=208 Nr of Repeats=4 RepeatLength=52 seed=GATGGAGGCC Num.seqs=3  
Similarity=0.880342 11  
GGGCCTCCATCGGGCGATGGACGACCGTTTATTGCTCAATCTCAGGTTTCA

\*\*\*\*\*  
Consensus:

GGGCCTCCATCaGGGCGATGGACGACCGTTTATTGCTCAATCTCAGGTTTCA

>Bacillus\_Fam\_577\_52\_2 Nr. of seq. 2 Alignment length(with gaps) = 52  
Alignment score = 0.730769  
GCF\_000986785.1\_ASM98678v1\_genomic.fna\_9:47447-47966 Satlength=520 Nr of  
Repeats=10 RepeatLength=52 seed=TTTTTCTCTC Num.seqs=9  
Similarity=0.773235  
0 TTTTTCTCTCATTTCNGCTGATTTCCGGTACTGAGGCCGCTGTCAGTACCTC  
Rev.of\_GCF\_000986785.1\_ASM98678v1\_genomic.fna\_31:15669-16293  
Satlength=625 Nr of Repeats=12 RepeatLength=52 seed=AGAAAAAGAG  
Num.seqs=12 Similarity=0.747942  
7 TTTTTCTCCNCTCTGCCGATTTCCGGTACTGACACGACCTGTCAGTGACTC

\*\*\*\*\* \* \*\* \*  
Consensus:

TTTTTCTCcCacTcTGCcGATTTCCGGTACTGAcCcaCCTGTCAGTaaCTC

>Bacillus\_Fam\_578\_52\_2 Nr. of seq. 2 Alignment length(with gaps) = 52  
Alignment score = 0.666667  
GCF\_001315085.1\_ASM131508v1\_genomic.fna\_3:24629-24950 Satlength=322 Nr of  
Repeats=4 RepeatLength=52 seed=GATGAAGACC Num.seqs=3 Similarity=0.846154  
0 GATGAAGACCGGAATGAAGCTTGAGTGAGAGGAAAAAGGTATTCATGAGGTT  
Rev.of\_GCF\_001439915.1\_ASM143991v1\_genomic.fna\_122:112785-113045  
Satlength=261 Nr of Repeats=5 RepeatLength=52 seed=GGTCTTCATA Num.seqs=5  
Similarity=0.716049 10  
TATGAAGACCTGAACGAAGCTTGAGCCTGCCCGAAAAGGTCTTCATCGGGTT

\*\*\*\*\* \*\*\* \*\*\*\*\* \* \*\*\*\*\* \*\*\*\*\*  
Consensus:

gATGAAGACCgGAACGAAGCTTGAGccaGaccaAAAAGGTaTTCATcaGGTT

>Bacillus\_Fam\_579\_52\_2 Nr. of seq. 2 Alignment length(with gaps) = 52  
Alignment score = 0.692308  
GCF\_001375535.1\_Bacillus\_niamyensis\_genomic.fna\_6:1820901-1821109  
Satlength=209 Nr of Repeats=4 RepeatLength=52 seed=GCGAGTTCGG Num.seqs=4  
Similarity=0.935897 0  
GCGAGTTCGGGACGTGAGAGTCGCCATCATGACCCATCAACGCGACTTTTCC

Rev.of\_GCF\_001375535.1\_Bacillus\_niameyensis\_genomic.fna\_6:3265006-3265630  
Satlength=625 Nr of Repeats=12 RepeatLength=52 seed=GCAAAAGTCG  
Num.seqs=12 Similarity=0.846154 0  
GCGGATTCGGGACATGAGGGACTCCATCATGAACCATTGGCACGACTTTTGC

\*\*\* \*\*\*\*\* \* \* \*\*\*\*\* \* \*\*\*\*\* \*  
Consensus:

GCGaaTTCGGGACaTGAGaGaCcCATCATGAaCCATcaaCaCGACTTTTcC

>Bacillus\_Fam\_580\_52\_2 Nr. of seq. 2 Alignment length(with gaps) = 52  
Alignment score = 0.705128  
GCF\_001375535.1\_Bacillus\_niameyensis\_genomic.fna\_6:2171941-2172148  
Satlength=208 Nr of Repeats=4 RepeatLength=52 seed=GGCCCGTTGG Num.seqs=3  
Similarity=0.888889 0  
GGCCCGTTGGTCTCTTTTTTGACACGAACGGGACATGATAAAGCNTCTCAT  
GCF\_001375535.1\_Bacillus\_niameyensis\_genomic.fna\_6:4192776-4193140  
Satlength=365 Nr of Repeats=7 RepeatLength=52 seed=TCTCATGTCC Num.seqs=7  
Similarity=0.829060 46  
GTCCCGTAGGNTCCTTTTTTTTCCGCGAACGGTCCGTGATAAAGCGTCTCAT

\* \*\*\*\*\* \* \* \*\*\*\*\* \* \*\*\*\*\* \*  
Consensus:

GgCCCGTaGGtTCccTTTTTTGaCaCGAACGGGaCaTGATAAAGCgTCTCAT

>Bacillus\_Fam\_581\_52\_2 Nr. of seq. 2 Alignment length(with gaps) = 52  
Alignment score = 0.653846  
GCF\_001420715.1\_ASM142071v1\_genomic.fna\_22:1909065-1909431 Satlength=367  
Nr of Repeats=7 RepeatLength=52 seed=ATGAAGGACA Num.seqs=5  
Similarity=0.853846 0  
ATGAAGGACAAGTTACACCAAGACAAAAGCAAAATGTCCTTCATCAAGTGG  
Rev.of\_GCF\_001420715.1\_ASM142071v1\_genomic.fna\_22:3763575-3764043  
Satlength=469 Nr of Repeats=9 RepeatLength=52 seed=ATGAAGGACA Num.seqs=9  
Similarity=0.763627 45  
ATGAAGGCCAAGTGACAGCAAGAAATTACGAANAGTGTCTTCATNAGGTAA

\*\*\*\*\* \*\*\*\*\* \* \* \* \* \*\*\*\*\* \* \*  
Consensus:

ATGAAGGaCAAGTgACAcCAAGAAaaaAaGaAaAaTGTCTTCATcAaGTaa

>Bacillus\_Fam\_582\_52\_2 Nr. of seq. 2 Alignment length(with gaps) = 52  
Alignment score = 0.801282  
GCF\_001420715.1\_ASM142071v1\_genomic.fna\_22:3674885-3675145 Satlength=261  
Nr of Repeats=5 RepeatLength=52 seed=TGGTCTTTTG Num.seqs=5  
Similarity=0.820513 40  
NCCTTATAAAGACCATTCGGAACCGGATTCTTCCACCAATTGGTCTTTTGAT  
GCF\_001420715.1\_ASM142071v1\_genomic.fna\_24:163648-164012 Satlength=365 Nr  
of Repeats=7 RepeatLength=52 seed=TAAAGACCAT Num.seqs=7  
Similarity=0.832723 58  
ACCTTATAAAGACCATTCGGATTCTTCTCACATTGGGCTTTTGAT

\*\*\* \*\*\*\*\* \* \* \*\*\*\*\* \* \*  
Consensus:

Consensus:

TGGgCTTTTGATaCCTTATAAAGACCATTcGGAacCGGATTCTTCCaCaaAT

>Bacillus\_Fam\_583\_52\_2 Nr. of seq. 2 Alignment length(with gaps) = 52  
Alignment score = 0.775641  
GCF\_001439965.1\_ASM143996v1\_genomic.fna\_121:145618-145878 Satlength=261  
Nr of Repeats=4 RepeatLength=52 seed=AGTTCCCGAA Num.seqs=3  
Similarity=0.794549 0  
AGTTCCCGAACCCAGGCAAACTCCCCTTCCAGGGTAATNAATCGTTCACCTTA  
Rev.of\_GCF\_002009555.1\_ASM200955v1\_genomic.fna\_550:13876-14084  
Satlength=209 Nr of Repeats=4 RepeatLength=52 seed=CGGGAATAA Num.seqs=4  
Similarity=0.722222 8  
AGTTCCCGTGCCTAGGCAAAATCCCCTCCAGGGTAATTAATCGGTCACTTT

\*\*\*\*\* \*\* \*\*\*\*\* \* \*\*\* \*\*\*\*\* \*\*\*\*\* \*\*\*\*\*

Consensus:

AGTTCCCGaaCCcAGGCAAAaTcCCCcTCCAGGGTAATtAATCGgTCACTTa

>Bacillus\_Fam\_584\_52\_2 Nr. of seq. 2 Alignment length(with gaps) = 52  
Alignment score = 0.666667  
GCF\_001591665.1\_ASM159166v1\_genomic.fna\_18:135261-135572 Satlength=312 Nr  
of Repeats=6 RepeatLength=52 seed=TCAGTGCCCG Num.seqs=5  
Similarity=0.784615 0  
TCAGTGCCCGTGCAGGGTAAAAAACAGGCTTATGGGCACTCAGACAGGTTG  
GCF\_001591665.1\_ASM159166v1\_genomic.fna\_19:38371-38679 Satlength=309 Nr  
of Repeats=6 RepeatLength=52 seed=GGCACTCAGA Num.seqs=4  
Similarity=0.830713  
35 TCAGTGCCCATGGAGGGGAAAAATGAATGCCACGGGCACTCAGAAAGGTTT

\*\*\*\*\* \*\* \*\*\*\*\* \*\*\*\*\* \* \*\* \* \*\*\*\*\* \*\*\*\*\*

Consensus:

TCAGTGCCCaTGcAGGGGaAAAAaaaAgGCccAcGGGCACTCAGAAAGGTTg

>Bacillus\_Fam\_585\_52\_2 Nr. of seq. 2 Alignment length(with gaps) = 52  
Alignment score = 0.647436  
GCF\_001591665.1\_ASM159166v1\_genomic.fna\_57:39088-39504 Satlength=417 Nr  
of Repeats=8 RepeatLength=52 seed=ATGAGGACAG Num.seqs=8  
Similarity=0.800366  
0 ATGAGGACAGGTTAGGCCCTTGCTTAACGATTTTGTCTCATGAACACCTC  
GCF\_001591805.1\_ASM159180v1\_genomic.fna\_32:17384-17591 Satlength=208 Nr  
of Repeats=4 RepeatLength=52 seed=GTCTCATGA Num.seqs=3  
Similarity=0.610063  
35 CTGAGGACAATTTAGCTCTTGCTCGNTGAGTTCTGTCTCATGAACGCCCC

\*\*\*\*\* \*\* \*\* \*\*\*\*\* \*\* \*\* \*\*\*\*\* \*\*\*\*\* \*\* \*

Consensus:

aTGAGGACAagTTaaGCcCTTGCTcaacGAgTTcTGTCTCATGAACaCCcC

>Bacillus\_Fam\_586\_52\_2 Nr. of seq. 2 Alignment length(with gaps) = 52  
Alignment score = 0.717949

GCF\_001591805.1\_ASM159180v1\_genomic.fna\_49:24442-24701 Satlength=260 Nr  
of Repeats=5 RepeatLength=52 seed=CTATTGGACA Num.seqs=4  
Similarity=0.824786  
0 CTATTGGACAAAACCCCTTATAAAGCACCCAGAATGTCCATTAGAGCCCTT  
Rev.of\_GCF\_001591805.1\_ASM159180v1\_genomic.fna\_80:5111-5317 Satlength=207  
Nr of Repeats=4 RepeatLength=52 seed=TTGTCCAATA Num.seqs=3  
Similarity=0.880342 11  
CTATTGGACAAAACCTCTTTTATAAACCCCTTAAATTGTCCAATAGACCCCTT

\*\*\*\*\* \* \* \* \*  
Consensus:

CTATTGGACAAAACcCccTTATAAAcCaCccAaAaTGTCCAaTAGAcCCCTT

>Bacillus\_Fam\_587\_52\_2 Nr. of seq. 2 Alignment length(with gaps) = 52  
Alignment score = 0.717949  
GCF\_001636315.1\_ASM163631v1\_genomic.fna\_1:1902145-1902509 Satlength=365  
Nr of Repeats=7 RepeatLength=52 seed=TGTGCACATT Num.seqs=7  
Similarity=0.765568 0  
TGTGCACATTGAAGCGTTCAATGAACACGAGAGAAAGGAATATCCACATAGA  
Rev.of\_GCF\_001636315.1\_ASM163631v1\_genomic.fna\_1:5398707-5398968  
Satlength=262 Nr of Repeats=5 RepeatLength=52 seed=CTTCAATGTG Num.seqs=4  
Similarity=0.696581 14  
AGTGCACATTGAAGGCTTCAATGAACACGGGAGCAAGGGAAATCATCGAAGA

\*\*\*\*\* \* \* \* \*  
Consensus:

aGTGCACATTGAAGccTTCAATGAACACGaGAGaAAGGaAaATCaaCaaAGA

>Bacillus\_Fam\_588\_52\_2 Nr. of seq. 2 Alignment length(with gaps) = 52  
Alignment score = 0.621795  
GCF\_001636325.1\_ASM163632v1\_genomic.fna\_2:129056-129316 Satlength=261 Nr  
of Repeats=5 RepeatLength=52 seed=TTATTCCTCT Num.seqs=5  
Similarity=0.941026  
0 TTATTCCTCTGAAGAAGAAAGAAATGAGCGGTCTTCCGGTGAATAACCAGAGT  
GCF\_001636325.1\_ASM163632v1\_genomic.fna\_3:419541-420114 Satlength=574 Nr  
of Repeats=11 RepeatLength=52 seed=TTCAGGTGAA Num.seqs=10  
Similarity=0.909402 32  
TTATTCCTCTGAAGCAGCNCAAAAGCACCTTGTTTCAGGTGAATAACCACGGT

\*\*\*\*\* \* \* \* \*  
Consensus:

TTATTCCTCTGAAGaAGaaaaAAaGaaCcgTcTTCaGGTGAATAACCACaGT

>Bacillus\_Fam\_589\_52\_2 Nr. of seq. 2 Alignment length(with gaps) = 52  
Alignment score = 0.641026  
GCF\_001636335.1\_ASM163633v1\_genomic.fna\_1:413718-414550 Satlength=833 Nr  
of Repeats=16 RepeatLength=52 seed=AAGAAAAAGT Num.seqs=16  
Similarity=0.861325 28  
ATGAAGGACAAAACGCAATGAGCAAAGGAAGAAAAAGTCCATCATAGGGCGA  
Rev.of\_GCF\_002019635.1\_ASM201963v1\_genomic.fna\_2:1603355-1603717  
Satlength=363 Nr of Repeats=7 RepeatLength=52 seed=TGAAGGACTT Num.seqs=6

Similarity=0.717695

44

ATGAAAGACAAAAGCCAACCGTCACAGAAGGGAAAAGTCCTTCATAGGGGCA

\* \* \* \* \* \* \* \* \* \* \* \* \* \* \* \* \* \* \* \* \* \* \* \* \* \* \* \*

Consensus:

AaGaAAAAGTCCaTCATAGGGccAATGAAaGACAAAaccCAAccagCAaAGa

>Bacillus\_Fam\_590\_52\_2 Nr. of seq. 2 Alignment length(with gaps) = 52

Alignment score = 0.698718

GCF\_001636335.1\_ASM163633v1\_genomic.fna\_1:1586996-1587464 Satlength=469

Nr of Repeats=9 RepeatLength=52 seed=ATGATGGACT Num.seqs=9

Similarity=0.908832

0

ATGATGGACTTTTCTGGCTTTNCCTGAATCGGTTTTGTCTTCATACCCCTT

Rev.of\_GCF\_001636335.1\_ASM163633v1\_genomic.fna\_2:265356-265928

Satlength=573 Nr of Repeats=11 RepeatLength=52 seed=ATCATCAAGG

Num.seqs=11 Similarity=0.870862

5 ATGATGGACTTTTTCCGCGTTCCCTCACACGCTTTTGTCTTCAGAACCTTG

\* \* \* \* \* \* \* \* \* \* \* \* \* \* \* \* \* \* \* \* \* \* \* \* \* \* \* \*

Consensus:

ATGATGGACTTTTcccGCgTTcCCTcAaaCGcTTTTGTCTTCaGaaCCTTg

>Bacillus\_Fam\_591\_52\_2 Nr. of seq. 2 Alignment length(with gaps) = 52

Alignment score = 0.769231

GCF\_001636345.1\_ASM163634v1\_genomic.fna\_1:791126-791369 Satlength=244 Nr

of Repeats=4 RepeatLength=52 seed=CTGGATTATA Num.seqs=3

Similarity=0.811966

0 CTGGATTATAGAGGTGTGTTTCGCGCTTTATCGGGACTCCGATTACCAAAAT

Rev.of\_GCF\_001636345.1\_ASM163634v1\_genomic.fna\_1:2232952-2233471

Satlength=520 Nr of Repeats=10 RepeatLength=52 seed=GAGAAACACA

Num.seqs=8 Similarity=0.748168

24 CTGGATTATAGAGGTGTGTTTCTCGCCGAATTGGGACACTGTTTACCAAATT

\* \* \* \* \* \* \* \* \* \* \* \* \* \* \* \* \* \* \* \* \* \* \* \* \* \* \* \*

Consensus:

CTGGATTATAGAGGTGTGTTTCgCGCcgaATcGGGACaCcGaTTACCAAAaT

>Bacillus\_Fam\_592\_52\_2 Nr. of seq. 2 Alignment length(with gaps) = 52

Alignment score = 0.647436

GCF\_001636345.1\_ASM163634v1\_genomic.fna\_1:1139536-1139952 Satlength=417

Nr of Repeats=8 RepeatLength=52 seed=GGAGAAACGA Num.seqs=8

Similarity=0.882784

0

GGAGAAACGAGCCCGAAAAGTCCAGTAAGTGGAAAAAGTGTCTGTAAACA

GCF\_001636345.1\_ASM163634v1\_genomic.fna\_1:1221728-1222246 Satlength=519

Nr of Repeats=10 RepeatLength=52 seed=GTATATGGAA Num.seqs=9

Similarity=0.850427

24

GGNTAAACGAGACACAATAGTCCAGTATATGGAAAACAGAGTCGTGATTACG

\* \* \* \* \* \* \* \* \* \* \* \* \* \* \* \* \* \* \* \* \* \* \* \* \* \* \* \*

Consensus:

GGGagAAACGAGaCacAAaAGTCCAGTAaaTGGAAAAaAGaGTCGTGaaaACa

>Bacillus\_Fam\_593\_52\_2 Nr. of seq. 2 Alignment length(with gaps) = 52  
Alignment score = 0.608974  
GCF\_001636425.1\_ASM163642v1\_genomic.fna\_1:697484-697900 Satlength=417 Nr  
of Repeats=8 RepeatLength=52 seed=TCATGAAGGA Num.seqs=8  
Similarity=0.717880  
0 TCATGAAGGACGTNTCCCTGGATATAGCAGCTCGAATTGTCCTTCATCACGC  
Rev.of\_GCF\_001636425.1\_ASM163642v1\_genomic.fna\_1:4328531-4328895  
Satlength=365 Nr of Repeats=7 RepeatLength=52 seed=AAAGTCCTTC Num.seqs=7  
Similarity=0.868132 14  
TCATGAAGGACTTTTCTCAAGACATCGGACANCCAAAAGTCCTTCATCNCCC

\*\*\*\*\* \* \* \* \* \* \* \* \* \* \*  
Consensus:

TCATGAAGGACgTtTCcCaaGAcATaGcAcatCcAAaaGTCCTTCATCaCcC

>Bacillus\_Fam\_594\_52\_2 Nr. of seq. 2 Alignment length(with gaps) = 52  
Alignment score = 0.974359  
GCF\_001887185.1\_ASM188718v1\_genomic.fna\_162:152517-152725 Satlength=209  
Nr of Repeats=4 RepeatLength=52 seed=CACATTTTTC Num.seqs=4  
Similarity=0.854701 0  
CACATTTTCTGCATTTTCGCTCCATTATCTGTTTCAAAACCTCTAGTTGACG  
GCF\_002009555.1\_ASM200955v1\_genomic.fna\_224:12277-12640 Satlength=364 Nr  
of Repeats=7 RepeatLength=52 seed=ACATTTTCT Num.seqs=6  
Similarity=0.852991  
1 CACATTTTCTGCATTTTCGCTCCATTATCTGTTTCAAAACCTCGAGTTGACG

\*\*\*\*\*  
Consensus:

CACATTTTCTGCATTTTCGCTCCATTATCTGTTTCAAAACCTCgAGTTGACG

>Bacillus\_Fam\_595\_52\_2 Nr. of seq. 2 Alignment length(with gaps) = 52  
Alignment score = 0.929487  
GCF\_001887185.1\_ASM188718v1\_genomic.fna\_178:71698-72478 Satlength=781 Nr  
of Repeats=15 RepeatLength=52 seed=GGGCACCTTT Num.seqs=15  
Similarity=0.850305 0  
GGGCACCTTTCTCCCTCTTTCGTTACCGCGAAACCGNTTTTTCCTCTCTAGC  
Rev.of\_GCF\_002009555.1\_ASM200955v1\_genomic.fna\_534:4610-5026  
Satlength=417 Nr of Repeats=8 RepeatLength=52 seed=AAAGGTGCCC Num.seqs=8  
Similarity=0.880952 10  
GGGCACCTTTCTCCCTCTTTCGTTACCGCGAAACCGCTTTTTCCTCTCGGGC

\*\*\*\*\*  
Consensus:

GGGCACCTTTCTCCCTCTTTCGTTACCGCGAAACCGcTTTTTCCTCTCgAGC

>Bacillus\_Fam\_596\_52\_2 Nr. of seq. 2 Alignment length(with gaps) = 52  
Alignment score = 0.794872

GCF\_900109925.1\_IMG-  
taxon\_2651870116\_annotated\_assembly\_genomic.fna\_16:433491-433753  
Satlength=263 Nr of Repeats=5 RepeatLength=52 seed=CTTCAATGTT Num.seqs=3  
Similarity=0.914530 0  
CTTCAATGTTACCGTTTCTATGATTTCAATAACTTTTTGGTCACATTGAGCT  
Rev.of\_GCF\_900109925.1\_IMG-  
taxon\_2651870116\_annotated\_assembly\_genomic.fna\_34:7995-8202  
Satlength=208 Nr of Repeats=4 RepeatLength=52 seed=CAGAGAAACG Num.seqs=3  
Similarity=0.948718 22  
CTTCAATGTGACCGTTTCTCTGATTTTACTTGCGTTTTGGTCACATTGAGCC

\*\*\*\*\*

Consensus:

CTTCAATGTgACCGTTTCTaTGATTTcAaTaaCgTTTTGGTCACATTGAGCc

>Bacillus\_Fam\_597\_52\_2 Nr. of seq. 2 Alignment length(with gaps) = 52  
Alignment score = 0.955128  
GCF\_900156875.1\_PRJEB18969\_genomic.fna\_11:364264-364471 Satlength=208 Nr  
of Repeats=4 RepeatLength=52 seed=ATGAAGACCG Num.seqs=3  
Similarity=0.863248  
0 ATGAAGACCGTTAGTTTTGGTGAATGAGCAAGAACCGTTATCATAGTTGAG  
GCF\_900156875.1\_PRJEB18969\_genomic.fna\_11:367968-368330 Satlength=363 Nr  
of Repeats=7 RepeatLength=52 seed=AACCGTTAT Num.seqs=5  
Similarity=0.858974  
32 ATGAAGACCGTTAGTTTTGGTGAATGCNCAAGAACCGTTATCATAGTTGAG

\*\*\*\*\*

Consensus:

ATGAAGACCGTTAGTTTTGGTGAATGagCAAGAACCGTTATCATAGTTGAG

>Bacillus\_Fam\_598\_52\_2 Nr. of seq. 2 Alignment length(with gaps) = 52  
Alignment score = 1.000000  
GCF\_900156875.1\_PRJEB18969\_genomic.fna\_11:1808457-1808873 Satlength=417  
Nr of Repeats=8 RepeatLength=52 seed=GGCTTTCATT Num.seqs=8  
Similarity=0.930403 0  
GGCTTTCATTCTTCTCATGATGACCTTTTCTCTAGCTCTCTAGAATGATTTTC  
GCF\_900156875.1\_PRJEB18969\_genomic.fna\_11:1817955-1818163 Satlength=209  
Nr of Repeats=4 RepeatLength=52 seed=ATTTCCGGCTT Num.seqs=4  
Similarity=0.948718 47  
GGCTTTCATTCTTCTCATGATGACCTTTTCTCTAGCTCTCTAGAATGATTTTC

\*\*\*\*\*

Consensus:

GGCTTTCATTCTTCTCATGATGACCTTTTCTCTAGCTCTCTAGAATGATTTTC

>Bacillus\_Fam\_599\_51\_2 Nr. of seq. 2 Alignment length(with gaps) = 51  
Alignment score = 0.712418  
GCF\_000292245.2\_ASM29224v2\_genomic.fna\_72:15429-15633 Satlength=205 Nr of  
Repeats=4 RepeatLength=51 seed=TTTCATTACC Num.seqs=4 Similarity=0.818910  
82 TATTCGTACCCTAATTAAGGCAACCTCCATTTTCATTACCAATCCCCTGT



GCF\_000292245.2\_ASM29224v2\_genomic.fna\_80:13385-13741 Satlength=357 Nr of Repeats=7 RepeatLength=51 seed=TTTTTTCGTA Num.seqs=6 Similarity=0.836752  
100 TTTTCGTACCCTAATTCAGCCAACACTCGAGTTTCATTACCTATTACCATT

\*\*\*\*\* \*\* \*\* \*\* \*\*\*\*\* \*\* \*\*\*\* \*\* \*

Consensus:

TTTCATTACCaATcaCCagTTaTTCGTACCCTAATTaAGcCAACaCTCcAg

>Bacillus\_Fam\_600\_51\_2 Nr. of seq. 2 Alignment length(with gaps) = 51  
Alignment score = 0.895425  
GCF\_000292245.2\_ASM29224v2\_genomic.fna\_92:17-274 Satlength=258 Nr of Repeats=5 RepeatLength=51 seed=TTCGGCTTAT Num.seqs=3 Similarity=0.895425  
0 TTCGGCTTATAATTCTTACTCTCCATTCTTTTTACGCCGAACCTCTCTCTTA  
Rev.of\_GCF\_000292245.2\_ASM29224v2\_genomic.fna\_125:10-369 Satlength=360 Nr of Repeats=7 RepeatLength=51 seed=TCGGCGTAAA Num.seqs=5  
Similarity=0.832680 40  
TTCGGCTTATAATTCTTTTTCTCCATTCTTTTTACGCCGAACCTGGCTCTTA

\*\*\*\*\* \*\*\*\*\* \*\*\*\*\*

Consensus:

TTCGGCTTATAATTCTTAcTCTCCATTCTTTTTACGCCGAACtCgCTCTTA

>Bacillus\_Fam\_601\_51\_2 Nr. of seq. 2 Alignment length(with gaps) = 51  
Alignment score = 1.000000  
GCF\_001420645.1\_ASM142064v1\_genomic.fna\_44:115239-115443 Satlength=205 Nr of Repeats=5 RepeatLength=51 seed=TTCTTGCTCT Num.seqs=3  
Similarity=0.912854 0  
TTCTTGCTCTTCTCTAGCATCGTCCTCGCTGAGCTCTTCTGTACTGTCTTC  
Rev.of\_GCF\_002019765.1\_ASM201976v1\_genomic.fna\_1:514830-515034  
Satlength=205 Nr of Repeats=5 RepeatLength=51 seed=GAGAAGAGCA Num.seqs=3  
Similarity=0.912854 14  
TTCTTGCTCTTCTCTAGCATCGTCCTCGCTGAGCTCTTCTGTACTGTCTTC

\*\*\*\*\*

Consensus:

TTCTTGCTCTTCTCTAGCATCGTCCTCGCTGAGCTCTTCTGTACTGTCTTC

>Bacillus\_Fam\_602\_51\_2 Nr. of seq. 2 Alignment length(with gaps) = 51  
Alignment score = 1.000000  
GCF\_002019665.1\_ASM201966v1\_genomic.fna\_1:857991-858195 Satlength=205 Nr of Repeats=4 RepeatLength=51 seed=AAAAGGAAAAG Num.seqs=4  
Similarity=0.908497  
0 AAAAGGAAAGCGCCAAAAGCCCGTTTGTGAACACGAAAATCGAAAAACAGG  
GCF\_002019665.1\_ASM201966v1\_genomic.fna\_1:859725-860133 Satlength=409 Nr of Repeats=8 RepeatLength=51 seed=CGTTTGTGAA Num.seqs=8  
Similarity=0.884220  
21 AAAAGGAAAGCGCCAAAAGCCCGTTTGTGAACACGAAAATCGAAAAACAGG

\*\*\*\*\*

Consensus:

AAAAGGAAAGCGCCAAAAGCCCGTTTGTGAACACGAAAAATCGAAAAACAGG

>Bacillus\_Fam\_603\_48\_2 Nr. of seq. 2 Alignment length(with gaps) = 48  
Alignment score = 1.000000  
GCF\_000153365.1\_ASM15336v1\_genomic.fna\_17:211270-211939 Satlength=670 Nr  
of Repeats=14 RepeatLength=48 seed=CAGATAGAGG Num.seqs=13  
Similarity=0.835470 0  
CAGATAGAGGAGGTTGAAGAACCGGAGCAAACCTGAGGAGTCAGAAGAG  
Rev.of\_GCF\_000473245.1\_ASM47324v1\_genomic.fna\_1:4315874-4316543  
Satlength=670 Nr of Repeats=14 RepeatLength=48 seed=CCTCTATCTG  
Num.seqs=13 Similarity=0.839744  
10 CAGATAGAGGAGGTTGAAGAACCGGAGCAAACCTGAGGAGTCAGAAGAG

\*\*\*\*\*  
Consensus:

CAGATAGAGGAGGTTGAAGAACCGGAGCAAACCTGAGGAGTCAGAAGAG

>Bacillus\_Fam\_604\_48\_2 Nr. of seq. 2 Alignment length(with gaps) = 48  
Alignment score = 0.951389  
GCF\_000712615.1\_ASM71261v1\_genomic.fna\_22:80497-81025 Satlength=529 Nr of  
Repeats=11 RepeatLength=48 seed=TTGGATTATC Num.seqs=11  
Similarity=0.853535  
0 TTGGATTATCCACTGCATTACTTTCTTCTTGTGAAACAGCACTATTAC  
GCF\_000712615.1\_ASM71261v1\_genomic.fna\_22:80497-81774 Satlength=1278 Nr  
of Repeats=16 RepeatLength=48 seed=TTGGATTATC Num.seqs=15  
Similarity=0.798942 0  
TTGGATTATCCACTGCATTACTTCTTCTTGAGAAACAGCACTATTAC

\*\*\*\*\*  
Consensus:

TTGGATTATCCACTGCATTACTtTCTTCTTGaGAAACAGCACTATTAC

>Bacillus\_Fam\_605\_48\_2 Nr. of seq. 2 Alignment length(with gaps) = 48  
Alignment score = 0.694444  
GCF\_000715205.1\_SOAPdenovo\_v1.05\_genomic.fna\_12:101104-101903  
Satlength=800 Nr of Repeats=6 RepeatLength=48 seed=TCTTTTGGCT Num.seqs=5  
Similarity=0.933333 0  
TCTTTTGGCTCTTCCATTGACCCATCACCAGGCTTTGTTCCGTCCTGA  
Rev.of\_GCF\_001578205.1\_ASM157820v1\_genomic.fna\_1:1255656-1255848  
Satlength=193 Nr of Repeats=4 RepeatLength=48 seed=GATCAGGATG Num.seqs=4  
Similarity=0.907596 2  
TCTTTCGGTTCTTCTGTTGTGCCATCGTCAGGTTTTGTCCCATCCTGA

\*\*\*\*\*  
Consensus:

TCTTTCGGcTCTTCcaTTGacCCATCacCAGGcTTTGTcCCaTCCTGA

>Bacillus\_Fam\_606\_47\_2 Nr. of seq. 2 Alignment length(with gaps) = 47  
Alignment score = 1.000000

GCF\_000153365.1\_ASM15336v1\_genomic.fna\_34:533-722 Satlength=190 Nr of Repeats=4 RepeatLength=47 seed=TCCGTGGACA Num.seqs=3 Similarity=0.981087  
0 TCCGTGGACAGATGGGGTGAAGTGTCTTTTGTGGTGCCAGGTACGC  
Rev.of\_GCF\_000473245.1\_ASM47324v1\_genomic.fna\_1:4144621-4144810  
Satlength=190 Nr of Repeats=4 RepeatLength=47 seed=AAAAGACACT Num.seqs=3  
Similarity=0.943262 30  
TCCGTGGACAGATGGGGTGAAGTGTCTTTTGTGGTGCCAGGTACGC

\*\*\*\*\*

Consensus:

TCCGTGGACAGATGGGGTGAAGTGTCTTTTGTGGTGCCAGGTACGC

>Bacillus\_Fam\_607\_46\_2 Nr. of seq. 2 Alignment length(with gaps) = 46  
Alignment score = 0.753623  
GCF\_001274915.1\_ASM127491v1\_genomic.fna\_25:723071-723296 Satlength=226 Nr of Repeats=5 RepeatLength=45 seed=CCAGGTGAAG Num.seqs=5  
Similarity=0.760000 0  
CCAGGTGAAG-GAGAATCTGGCCAACCGGAAGAGGAAGTAACGGAG  
Rev.of\_GCF\_000011145.1\_ASM1114v1\_genomic.fna\_1:3424216-3424396  
Satlength=181 Nr of Repeats=4 RepeatLength=45 seed=CTTCACCTGG Num.seqs=4  
Similarity=0.737923 10  
CCAGGTGAAGAGGGAATCTGGTCAGCCAGAGGAAGAAATAACGGAG

\*\*\*\*\* \* \*\*\*\*\* \*\* \*\* \*\* \*\*

Consensus:

CCAGGTGAAGaGaGAATCTGGcCAaCCaGAaGAaGAAaTAACGGAG

>Bacillus\_Fam\_608\_45\_2 Nr. of seq. 2 Alignment length(with gaps) = 45  
Alignment score = 0.629630  
GCF\_000290995.1\_Baci\_cere\_AND1407\_G13175\_V1\_genomic.fna\_2:809286-809454  
Satlength=169 Nr of Repeats=4 RepeatLength=42 seed=AATCCAACGA Num.seqs=4  
Similarity=0.962963 0  
AATCCAACGACACCACCA--CAAGTGAAGGAAATAATGGAGAA  
Rev.of\_GCF\_000712615.1\_ASM71261v1\_genomic.fna\_1:387890-388565  
Satlength=676 Nr of Repeats=15 RepeatLength=45 seed=CCACCTGTCTG  
Num.seqs=15 Similarity=0.988713  
29 AATCCAACAACACCACCAACGACAGGTGGAGACAACAACGGGGAT

\*\*\*\*\* \*\*\*\*\* \*\* \*\* \*\* \*\*

Consensus:

AATCCAACaACACCACCAAcgaCAaGTGaAGaaAAcAAcGGaGAa

>Bacillus\_Fam\_609\_45\_2 Nr. of seq. 2 Alignment length(with gaps) = 45  
Alignment score = 0.614815  
GCF\_000612625.1\_JCE\_genomic.fna\_6:32809-33331 Satlength=523 Nr of Repeats=6 RepeatLength=42 seed=GGCATTTGAC Num.seqs=4 Similarity=0.888889  
0 GGCATTTGACCGTATCCGCTGGCA-TTTCT--CCAGCACCCATT  
GCF\_001591445.1\_ASM159144v1\_genomic.fna\_9:113119-113479 Satlength=361 Nr of Repeats=7 RepeatLength=45 seed=GGCATTTGTC Num.seqs=6  
Similarity=0.741844  
0 GGCATTTGTCCATATCCTGCTGGTACTTGCTGACCATAACCCTGT

\*\*\*\*\* \*\* \*\*\*\*\* \*\*\*\*\* \* \*\* \*\* \*\*\* \*\*\*\*\* \*

Consensus:

GGCATTTGaCCaTATCCcGCTGGcAcTTgCTGaCCAgAACCcagT

>Bacillus\_Fam\_610\_45\_2 Nr. of seq. 2 Alignment length(with gaps) = 45

Alignment score = 0.874074

GCF\_000161455.1\_ASM16145v1\_genomic.fna\_1:4124623-4124845 Satlength=223 Nr of Repeats=5 RepeatLength=45 seed=GAAAAAAGAA Num.seqs=4

Similarity=0.851852

0

GAAAAAAGAAGCAGCAATGCAAGAACAACAAAAACAAGATAAAAT

GCF\_000712615.1\_ASM71261v1\_genomic.fna\_21:61395-61572 Satlength=178 Nr of Repeats=4 RepeatLength=45 seed=GAAAAAAGAA Num.seqs=3 Similarity=0.628118

0 GAAAAAAGAAGCAGCAATTCAGNNACAACAAAAACAAGATNAAAT

\*\*\*\*\* \*\* \*\*\*\*\* \*\*\*\*\* \*\*\*\*\* \*\*\*\*\*

Consensus:

GAAAAAAGAAGCAGCAATgCAagaACAACAAAAACAAGATaAAAT

>Bacillus\_Fam\_611\_45\_2 Nr. of seq. 2 Alignment length(with gaps) = 45

Alignment score = 0.822222

GCF\_000724485.1\_ASM72448v1\_genomic.fna\_1:628866-629091 Satlength=226 Nr of Repeats=5 RepeatLength=45 seed=GATTCCTCAT Num.seqs=5

Similarity=0.952593

0 GATTCCTCATCAGATTCATATTCATCGCTTGACTCGTTATCTTCA

GCF\_000724485.1\_ASM72448v1\_genomic.fna\_1:959830-960010 Satlength=181 Nr of Repeats=4 RepeatLength=45 seed=TCTTCAGATT Num.seqs=4

Similarity=0.925926

39 GATTCCTCGTCGGATTTCGTAACCATCGCTAGACTCGTTATCTTCA

\*\*\*\*\* \*\* \*\*\*\*\* \*\* \*\*\*\*\* \*\*\*\*\* \*\*\*\*\*

Consensus:

GATTCCTCaTCaGATTCaTAacCATCGCTaGACTCGTTATCTTCA

>Bacillus\_Fam\_612\_43\_2 Nr. of seq. 2 Alignment length(with gaps) = 43

Alignment score = 0.837209

GCF\_000175075.1\_ASM17507v1\_genomic.fna\_41:65761-65929 Satlength=169 Nr of Repeats=4 RepeatLength=42 seed=GAAGCACCGG Num.seqs=4 Similarity=0.915344

0 GAAGC-ACCGGCTGAAGAACCTGTAAACAGAGGAACCAGCAGAG

GCF\_001648575.1\_ASM164857v1\_genomic.fna\_67:24594-24762 Satlength=169 Nr of Repeats=4 RepeatLength=42 seed=GCTGAAGAGC Num.seqs=4

Similarity=0.906977

10 GAAGCTCCcNGCTGAAGAGCCTGTAAACAGAGGCACCAGCAGAG

\*\*\*\*\* \*\* \*\*\*\*\* \*\*\*\*\* \*\*\*\*\* \*\*\*\*\*

Consensus:

GAAGCtaCCgGCTGAAGaAcCTGTAAACAGAGGaACCAGCAGAG

>Bacillus\_Fam\_613\_43\_2 Nr. of seq. 2 Alignment length(with gaps) = 43

Alignment score = 0.689922

GCF\_000430785.1\_ASM43078v1\_genomic.fna\_16:70154-71534 Satlength=1381 Nr of Repeats=21 RepeatLength=42 seed=CATGCCGAAG Num.seqs=15  
Similarity=0.532988 0  
CATGCNGAAGGTNNNNNTACAACNGCAAGT-GGANATNCTTCN  
GCF\_000430785.1\_ASM43078v1\_genomic.fna\_16:70112-70730 Satlength=619 Nr of Repeats=9 RepeatLength=42 seed=CATGCGGAAG Num.seqs=6 Similarity=0.576227  
0 CATGCGGAAGGTNAAANCACAACAGCAAGTGGGANATGCTTCN

\*\*\*\*\* \* \*\*\*\*\*

Consensus:

CATGCgGAAGGTNaaaNcACAACaGCAAGTgGGANATgCTTCN

>Bacillus\_Fam\_614\_43\_2 Nr. of seq. 2 Alignment length(with gaps) = 43  
Alignment score = 0.732558  
GCF\_000712615.1\_ASM71261v1\_genomic.fna\_10:62613-63201 Satlength=589 Nr of Repeats=14 RepeatLength=42 seed=CCTTCCGCAT Num.seqs=14  
Similarity=0.614123  
0 CCTTCCGCATGCGAGNCAANTCCACTGGCTATTGTATTAANT-  
GCF\_000712615.1\_ASM71261v1\_genomic.fna\_10:65183-65897 Satlength=715 Nr of Repeats=16 RepeatLength=42 seed=CCTTCCGCAT Num.seqs=15  
Similarity=0.501622  
0 CCTTCCGCATGCGANNANCTCCACTGGCTATTGTNTNCANNN

\*\*\*\*\* \* \* \*\*\*\*\*

Consensus:

CCTTCCGCATGCGAgNcAacTCCACTGGCTATTGTaTtaANtn

>Bacillus\_Fam\_615\_43\_2 Nr. of seq. 2 Alignment length(with gaps) = 43  
Alignment score = 0.658915  
GCF\_000986785.1\_ASM98678v1\_genomic.fna\_101:89286-89496 Satlength=211 Nr of Repeats=4 RepeatLength=42 seed=GGAGGAGCGA Num.seqs=3  
Similarity=0.873016  
0 GGAGGAGCGATGGACGCCAA-ATGCCGCACATGCCGAGGTG  
Rev.of\_GCF\_900109925.1\_IMG-  
taxon\_2651870116\_annotated\_assembly\_genomic.fna\_16:169506-169773  
Satlength=268 Nr of Repeats=6 RepeatLength=42 seed=CTTGCGGCAT Num.seqs=5  
Similarity=0.917460 40 GCAGGAGCAATGGATGCGCAATAT-  
CCACATATGCCGCAAGTA

\* \*\*\*\*\* \*\* \*\*\* \*\* \*\* \*\*\*\*\*

Consensus:

GcAGGAGCaATGGAcGCCaCAAtATgCCaCAcATGCCGCAaGTa

>Bacillus\_Fam\_616\_42\_2 Nr. of seq. 2 Alignment length(with gaps) = 42  
Alignment score = 0.793651  
GCF\_000429725.1\_ASM42972v1\_genomic.fna\_2:332298-332770 Satlength=473 Nr of Repeats=5 RepeatLength=41 seed=CGATTGTGAC Num.seqs=3  
Similarity=0.913279  
0 CGATTGTGACCAAGCGCGGCG-AAACTCCGGCCAATTGGCGA  
Rev.of\_GCF\_000429725.1\_ASM42972v1\_genomic.fna\_10:90786-91168  
Satlength=383 Nr of Repeats=8 RepeatLength=41 seed=AATTGTCCGC Num.seqs=6

Similarity=0.785185  
AGATTGTGACCAAGCGCGGCGNAAAGTGCGGACAATTGGCGG

37

\*\*\*\*\*  
Consensus:

aGATTGTGACCAAGCGCGGCGnAAAcTcCGGaCAATTGGCGa

>Bacillus\_Fam\_617\_42\_2 Nr. of seq. 2 Alignment length(with gaps) = 42  
Alignment score = 0.690476  
GCF\_000504145.1\_SOAPdenovo\_for\_version2.04\_of\_Bacillus\_sp.\_FJAT-  
14515\_genome\_genomic.fna\_1:1999822-2000150 Satlength=329 Nr of Repeats=8  
RepeatLength=41 seed=ATTTTCGGATT Num.seqs=8 Similarity=0.809524 0  
ATTTTCG-GATTTGCGGGCCGGAATCCATACTTTTCATGCCGG  
Rev.of\_GCF\_000504145.1\_SOAPdenovo\_for\_version2.04\_of\_Bacillus\_sp.\_FJAT-  
14515\_genome\_genomic.fna\_23:124770-125136 Satlength=367 Nr of Repeats=9  
RepeatLength=41 seed=CGCAAATCAC Num.seqs=7 Similarity=0.14 A-  
TTCGTGATTTGCGTGCCAGAACACACTCTTTTCNTGCCGG

\* \*\*\*\*  
Consensus:

AtTTCGtGATTTGCGgGCCaGAaCaCacaCTTTTCaTGCCGG

>Bacillus\_Fam\_618\_42\_2 Nr. of seq. 2 Alignment length(with gaps) = 42  
Alignment score = 0.638889  
GCF\_002019665.1\_ASM201966v1\_genomic.fna\_1:3639369-3639982 Satlength=614  
Nr of Repeats=15 RepeatLength=41 seed=TTCGTCCCTA Num.seqs=13  
Similarity=0.892850 0  
TTCG-TCCCTATCCGTCGGTAAATCCCTTCATTCGTTGGTAG  
Rev.of\_GCF\_002019665.1\_ASM201966v1\_genomic.fna\_1:4598013-4598833  
Satlength=821 Nr of Repeats=20 RepeatLength=41 seed=TTACCAACGA  
Num.seqs=20 Similarity=0.827213  
0 -CCGATCGCTATGCGTGGGTAAACTCGTTATTCGTTGGTAA

\*\* \*\*  
Consensus:

tcCGaTcCCTATcCGTcGGTAAaCcCgTcATTTCGTTGGTAa

>Bacillus\_Fam\_619\_42\_2 Nr. of seq. 2 Alignment length(with gaps) = 42  
Alignment score = 0.809524  
GCF\_000007825.1\_ASM782v1\_genomic.fna\_1:3435556-3435724 Satlength=169 Nr  
of Repeats=4 RepeatLength=42 seed=GGAATAACTG Num.seqs=4  
Similarity=0.968254  
0 GGAATAACTGGTCCTACTGGGGTTACAGGTTCTACCGGAATC  
GCF\_000008505.1\_ASM850v1\_genomic.fna\_1:3325303-3325513 Satlength=211 Nr  
of Repeats=5 RepeatLength=42 seed=GGAATTGGCA Num.seqs=5  
Similarity=0.923810  
36 GGCATTACTGGTCCTACTGGAGTTACAGGACCTACCGGAATT

\*\* \*\*  
Consensus:

GGaATaACTGGTCCTACTGGAATTACAGGacCTACCGGAATc

>Bacillus\_Fam\_620\_42\_2 Nr. of seq. 2 Alignment length(with gaps) = 42  
Alignment score = 1.000000  
GCF\_000009825.1\_ASM982v1\_genomic.fna\_1:3313462-3313630 Satlength=169 Nr  
of Repeats=4 RepeatLength=42 seed=CTTGCTTTCA Num.seqs=4  
Similarity=0.899471  
0 CTTGCTTTCAATGATGAAATGCGCCATTTCCAAAAGGAGCAG  
GCF\_900142675.1\_IMG-  
taxon\_2654588196\_annotated\_assembly\_genomic.fna\_7:92101-92269  
Satlength=169 Nr of Repeats=4 RepeatLength=42 seed=CTTGCTTTCA Num.seqs=4  
Similarity=0.920635 0  
CTTGCTTTCAATGATGAAATGCGCCATTTCCAAAAGGAGCAG

\*\*\*\*\*  
Consensus:

CTTGCTTTCAATGATGAAATGCGCCATTTCCAAAAGGAGCAG

>Bacillus\_Fam\_621\_42\_2 Nr. of seq. 2 Alignment length(with gaps) = 42  
Alignment score = 0.809524  
GCF\_000169195.2\_ASM16919v2\_genomic.fna\_1:2452745-2452955 Satlength=211 Nr  
of Repeats=5 RepeatLength=42 seed=GGATCAGGTT Num.seqs=5  
Similarity=0.841270 0  
GGATCAGGTTCTGCATCCGGAACGACCGCAACGGGCAACACC  
Rev.of\_GCF\_000832905.1\_ASM83290v1\_genomic.fna\_1:1285270-1285522  
Satlength=253 Nr of Repeats=6 RepeatLength=42 seed=GAACCCGATC Num.seqs=6  
Similarity=0.832804 11  
GGATCGGGTCCGCGTCCGGGACGACTGCAACGGGCAACACT

\*\*\*\*\*  
Consensus:

GGATCaGGTTcGCaTCCGGaACGACcGCAACGGGCAACACc

>Bacillus\_Fam\_622\_42\_2 Nr. of seq. 2 Alignment length(with gaps) = 42  
Alignment score = 1.000000  
GCF\_000186145.1\_Bacillus\_sp\_2\_A\_57\_CT2\_V1\_genomic.fna\_2:304102-304312  
Satlength=211 Nr of Repeats=6 RepeatLength=42 seed=TTTGATTTCGG Num.seqs=4  
Similarity=0.915344 0  
TTTGATTTCGGTTGATCAGAAGTTTGATTCCATTGATCAGAGA  
GCF\_000294775.2\_ASM29477v2\_genomic.fna\_1:4910289-4910520 Satlength=232 Nr  
of Repeats=6 RepeatLength=42 seed=GATTCCATTG Num.seqs=5  
Similarity=0.905426 24  
TTTGATTTCGGTTGATCAGAAGTTTGATTCCATTGATCAGAGA

\*\*\*\*\*  
Consensus:

TTTGATTTCGGTTGATCAGAAGTTTGATTCCATTGATCAGAGA

>Bacillus\_Fam\_623\_42\_2 Nr. of seq. 2 Alignment length(with gaps) = 42  
Alignment score = 0.650794

GCF\_000299035.1\_ASM29903v1\_genomic.fna\_5:177403-178117 Satlength=715 Nr  
of Repeats=17 RepeatLength=42 seed=AGTTGTAGTG Num.seqs=17  
Similarity=0.981793 0  
AGTTGTAGTGGAACTCGAGAAGAAGAGAGACCAGTAGAGCG  
Rev.of\_GCF\_000712615.1\_ASM71261v1\_genomic.fna\_6:43769-44105 Satlength=337  
Nr of Repeats=8 RepeatLength=42 seed=ACTACTTCTT Num.seqs=8  
Similarity=0.878685 9  
AGAAGTAGTGGAGGCTCAAGCCGAAGAGAGACCGGTACATCA

\*\* \*\*\*\*\* \*\* \*\* \*\*\*\*\* \*\* \* \*  
Consensus:

AGaaGTAGTGGAAaCTCaAGaaGAAGAGAGACCaGTAcAgCa

>Bacillus\_Fam\_624\_42\_2 Nr. of seq. 2 Alignment length(with gaps) = 42  
Alignment score = 0.690476  
GCF\_000307875.1\_BABA1.0\_genomic.fna\_120:5376-5682 Satlength=307 Nr of  
Repeats=7 RepeatLength=42 seed=GGAGAAATGC Num.seqs=5 Similarity=0.885714  
0 GGAGAAATGCCACAAGGTTACGGCCAGATGCCGACAGGNTAC  
GCF\_000508325.1\_BAVI\_1\_genomic.fna\_148:13-268 Satlength=256 Nr of  
Repeats=5 RepeatLength=42 seed=AATGCCGGGA Num.seqs=4 Similarity=0.814815  
5 GGAGAAATGCCGGGAGCCTATGGCCAAATGCCAGCAGGATAC

\*\*\*\*\* \*\* \*\* \*\*\*\*\* \*\*\*\*\* \*\*\*\*\* \*\*  
Consensus:

GGAGAAATGCCaCaAGccTAcGGCCaAATGCCaACAGGaTAC

>Bacillus\_Fam\_625\_42\_2 Nr. of seq. 2 Alignment length(with gaps) = 42  
Alignment score = 0.730159  
GCF\_000331575.1\_ASM33157v1\_genomic.fna\_2:519806-520142 Satlength=337 Nr  
of Repeats=8 RepeatLength=42 seed=AGATTCGTGG Num.seqs=8  
Similarity=0.833333  
0 AGATTCGTGGGTAAAGCACCGGGTTATGTGGGTATTCTACTA  
GCF\_000331575.1\_ASM33157v1\_genomic.fna\_6:31803-31970 Satlength=168 Nr of  
Repeats=4 RepeatLength=42 seed=GAGTTATATG Num.seqs=3 Similarity=0.839793  
20 AAATCGTGGGTAAANCNCCGAGTTATATGGGTATTCCACCC

\* \* \*\*\*\*\* \* \*\* \*\*\*\*\* \*\*\*\*\* \*\*  
Consensus:

AaAcTCGTGGGTAAAgCaCCGaGTTATaTGGGTATTCCaACca

>Bacillus\_Fam\_626\_42\_2 Nr. of seq. 2 Alignment length(with gaps) = 42  
Alignment score = 0.968254  
GCF\_000496285.1\_ASM49628v1\_genomic.fna\_1:4580071-4580491 Satlength=421 Nr  
of Repeats=10 RepeatLength=42 seed=CCAGGAGGCG Num.seqs=10  
Similarity=0.899824 0  
CCAGGAGGCGGAACGGGAACAGATAACGGAACCGGAGGAAAC  
GCF\_000831065.1\_ASM83106v1\_genomic.fna\_1:1836001-1836505 Satlength=505 Nr  
of Repeats=12 RepeatLength=42 seed=CCAGGAGGCG Num.seqs=12  
Similarity=0.956229 0  
CCAGGAGGCGGAACGGGAACAGACAACGGAACCGGAGGAAAC



\*\*\*\*\*

Consensus:

CCAGGAGGCGGAACGGGAACAGAcAACGGAACCGGAGGAAAC

>Bacillus\_Fam\_627\_42\_2 Nr. of seq. 2 Alignment length(with gaps) = 42

Alignment score = 1.000000

GCF\_001375535.1\_Bacillus\_niameyensis\_genomic.fna\_6:3545829-3546081

Satlength=253 Nr of Repeats=6 RepeatLength=42 seed=GAAGTCGCGA Num.seqs=6  
Similarity=0.836176 0

GAAGTCGCGAAATTCCGGTGGGAAGTTGAAAGATTAACGGGA

GCF\_001375535.1\_Bacillus\_niameyensis\_genomic.fna\_6:3549055-3549349

Satlength=295 Nr of Repeats=7 RepeatLength=42 seed=GAAGTCGCGA Num.seqs=7  
Similarity=0.838686 0

GAAGTCGCGAAATTCCGGTGGGAAGTTGAAAGATTAACGGGA

\*\*\*\*\*

Consensus:

GAAGTCGCGAAATTCCGGTGGGAAGTTGAAAGATTAACGGGA

>Bacillus\_Fam\_628\_41\_2 Nr. of seq. 2 Alignment length(with gaps) = 41

Alignment score = 0.617886

GCF\_000321185.1\_ASM32118v1\_genomic.fna\_73:13581-13737 Satlength=157 Nr of  
Repeats=4 RepeatLength=39 seed=TTCTTTTACT Num.seqs=4 Similarity=0.794872  
0 TTCTTTTACTGGAGCTGTTTTG--ACAATTGGCTTTGGCGC

Rev.of\_GCF\_000380245.2\_ASM38024v2\_genomic.fna\_12:375741-376014

Satlength=274 Nr of Repeats=7 RepeatLength=39 seed=AAAGAAGCAC Num.seqs=7  
Similarity=0.744404 6

TTCTTTTACT--ATTGGTTTTGTTACATTTGGCTGNGGTGC

\*\*\*\*\* \* \*\*\*\*\* \*\*\* \*\*\*\*\* \*\* \*\*

Consensus:

TTCTTTTACTggAgcgGTTTTGttACAaTTGGCTgtGGcGC

>Bacillus\_Fam\_629\_41\_2 Nr. of seq. 2 Alignment length(with gaps) = 41

Alignment score = 0.626016

GCF\_001648575.1\_ASM164857v1\_genomic.fna\_3:413-553 Satlength=141 Nr of

Repeats=4 RepeatLength=40 seed=GCGGATAAAA Num.seqs=3 Similarity=0.911111  
0 GCGGATAAACGGA-AAAGTCGCGGATATATCGGAAAGTTA

Rev.of\_GCF\_000612805.1\_FF3\_genomic.fna\_4:298364-298568 Satlength=205 Nr

of Repeats=5 RepeatLength=41 seed=AATATATCAG Num.seqs=4

Similarity=0.967480

32 GCTGATAAATCAAAGAAAGTCGCTGATATATTTTAAATTTC

\*\* \*\*\*\*\* \* \* \*\*\*\*\* \*\*\*\*\* \*\*\* \*\*

Consensus:

GCgGATAAAaCaaAgAAAGTCGcGATATATcggAAAgTTa

>Bacillus\_Fam\_630\_40\_2 Nr. of seq. 2 Alignment length(with gaps) = 40

Alignment score = 0.754167

GCF\_001742425.1\_ASM174242v1\_genomic.fna\_9:30829-31159 Satlength=331 Nr of Repeats=9 RepeatLength=39 seed=TGTTCTTCTG Num.seqs=7 Similarity=0.796500  
0 TGTTCTTCTGTTGGCTCTGTAGCTTCTACTTCTTCAG-CT  
GCF\_001742425.1\_ASM174242v1\_genomic.fna\_9:45797-45992 Satlength=196 Nr of Repeats=5 RepeatLength=39 seed=TTCTACTTCT Num.seqs=5 Similarity=0.816667  
22 -G TTCATCTGTTGGCTCTGTTATTTCTACTTCTTCTGTCT

\*\*\*\* \*\*\*\*\* \* \*\*

Consensus:

tGTTCaTCTGTTGGCTCTGTaacTTCTACTTCTTCaGtCT

>Bacillus\_Fam\_631\_39\_2 Nr. of seq. 2 Alignment length(with gaps) = 39  
Alignment score = 0.897436

GCF\_000007825.1\_ASM782v1\_genomic.fna\_1:4838007-4838475 Satlength=469 Nr of Repeats=12 RepeatLength=39 seed=GGTTTCACTT Num.seqs=12  
Similarity=0.948718 0

GGTTTCACTTCTGGCTCCTTCGGCTCTTTTCGGATCTTCC

GCF\_000831065.1\_ASM83106v1\_genomic.fna\_1:4592019-4592604 Satlength=586 Nr of Repeats=15 RepeatLength=39 seed=TTCACTTCTG Num.seqs=15  
Similarity=0.890924 3

GGCTTCACTTCTGGTTTCCTTCGGTTCTTTTCGGATCTTCC

\*\* \*\*\*\*\*

Consensus:

GGcTTCACTTCTGGcTCCTTCGGcTCTTTTCGGATCTTCC

>Bacillus\_Fam\_632\_39\_2 Nr. of seq. 2 Alignment length(with gaps) = 39  
Alignment score = 0.897436

GCF\_000008505.1\_ASM850v1\_genomic.fna\_1:5094439-5094634 Satlength=196 Nr of Repeats=5 RepeatLength=39 seed=AATCCGGAAC Num.seqs=5  
Similarity=0.972650

0 AATCCGGAACAAAATCCAGCAACTAAACCTGCTACTGAC

GCF\_001645555.1\_ASM164555v1\_genomic.fna\_13:56878-57034 Satlength=157 Nr of Repeats=4 RepeatLength=39 seed=CTAAACCTGT Num.seqs=4  
Similarity=0.914530

22 AATCCGGAACAAAACCCAGCAACTAAACCTGTTACTGAT

\*\*\*\*\*

Consensus:

AATCCGGAACAAAACCCAGCAACTAAACCTGcTACTGAc

>Bacillus\_Fam\_633\_39\_2 Nr. of seq. 2 Alignment length(with gaps) = 39  
Alignment score = 0.760684

GCF\_000175075.1\_ASM17507v1\_genomic.fna\_32:156308-156500 Satlength=193 Nr of Repeats=5 RepeatLength=39 seed=TGATCGTGCT Num.seqs=4  
Similarity=0.886040

0 TGATCGTGCTCTTCCTCATGAGCTTCTTCTCATGCTCA

Rev.of\_GCF\_001648575.1\_ASM164857v1\_genomic.fna\_58:140804-140999

Satlength=196 Nr of Repeats=5 RepeatLength=39 seed=CACGAGCATG Num.seqs=5  
Similarity=0.835897 2

TGGTCATGGTCGTCGCCATGAGCTTCTTCTCATGCTCG

\*\* \*\* \* \* \* \* \*

Consensus:

TGaTCaTGcTCgTCccCATGAGCTTCTTCCTCATGCTCa

>Bacillus\_Fam\_634\_39\_2 Nr. of seq. 2 Alignment length(with gaps) = 39  
Alignment score = 0.641026  
GCF\_000331575.1\_ASM33157v1\_genomic.fna\_6:36584-36779 Satlength=196 Nr of  
Repeats=5 RepeatLength=39 seed=ATGACCATGA Num.seqs=5 Similarity=0.856410  
0 ATGACCATGATGGAAGCCATAACCAGGGTAGTAACCGCC  
Rev.of\_GCF\_001420715.1\_ASM142071v1\_genomic.fna\_22:732730-732964  
Satlength=235 Nr of Repeats=6 RepeatLength=39 seed=TACCATCATG Num.seqs=6  
Similarity=0.783476 15  
ATGTCCATGATGGTAGCCTTGACCTGGGTNATAGGTNCC

\*\*\* \* \* \* \* \*

Consensus:

ATGaCCATGATGGaAGCCaTaACCaGGGTaaTAaccgCC

>Bacillus\_Fam\_635\_39\_2 Nr. of seq. 2 Alignment length(with gaps) = 39  
Alignment score = 0.794872  
GCF\_000474275.1\_Bmar1.0\_genomic.fna\_30:49658-49853 Satlength=196 Nr of  
Repeats=6 RepeatLength=39 seed=CATGCTCGTG Num.seqs=4 Similarity=0.863248  
0 CATGCTCGTGATCATGATCTTCCTCATGCCCCGTGCTCTT  
GCF\_002019665.1\_ASM201966v1\_genomic.fna\_1:1072418-1072646 Satlength=229  
Nr of Repeats=6 RepeatLength=39 seed=TGTGCGTCCT Num.seqs=5  
Similarity=0.958974 26  
CATGTTCTGATCATGATCTTCCTCATGTGCGTCCTCAC

\*\*\*\* \* \* \* \*

Consensus:

CATGcTCGTGATCATGATCTTCCTCATGccCGTcCTCac

>Bacillus\_Fam\_636\_39\_2 Nr. of seq. 2 Alignment length(with gaps) = 39  
Alignment score = 0.974359  
GCF\_000775975.1\_ASM77597v1\_genomic.fna\_1:181115-181253 Satlength=139 Nr  
of Repeats=4 RepeatLength=39 seed=AGAAGAAGTT Num.seqs=3  
Similarity=0.836111  
0 AGAAGAAGTTGTGGAATTAGAGAAATCTGAGGAAGCGAC  
GCF\_000832605.1\_ASM83260v1\_genomic.fna\_1:1287745-1288135 Satlength=391 Nr  
of Repeats=11 RepeatLength=39 seed=AGAAGAAGTT Num.seqs=9  
Similarity=0.860185 0  
AGAAGAAGTTGTGGAATTAGAGAAANCTGAGGAAGCGAC

\*\*\*\*\*

Consensus:

AGAAGAAGTTGTGGAATTAGAGAAAtCTGAGGAAGCGAC

>Bacillus\_Fam\_637\_39\_2 Nr. of seq. 2 Alignment length(with gaps) = 39  
Alignment score = 0.666667

GCF\_001654695.1\_ASM165469v1\_genomic.fna\_23:241573-241729 Satlength=157 Nr  
of Repeats=4 RepeatLength=39 seed=AAGAAGGAAG Num.seqs=4  
Similarity=0.982906 0

AAGAAGGAAGAACAAGCACGTTTAGCTGAAGAACAGCGT

GCF\_900156875.1\_PRJEB18969\_genomic.fna\_11:570675-570870 Satlength=196 Nr  
of Repeats=5 RepeatLength=39 seed=AAGCAAGAAG Num.seqs=5  
Similarity=0.815385

0 AAGCAAGAAGAAGCAGATCGNTTAGCAGAGGAACAGCGA

\*\*\* \* \*\*\*\*\* \*\* \*\* \*\*\*\*\* \*\* \*\*\*\*\*

Consensus:

AAGaAaGAAGAAcaAGaaCGtTTAGCaGAaGAACAGCGa

>Bacillus\_Fam\_638\_39\_2 Nr. of seq. 2 Alignment length(with gaps) = 39  
Alignment score = 0.940171

GCF\_001877785.1\_PlanoSAMM\_genomic.fna\_96:168466-169318 Satlength=853 Nr  
of Repeats=16 RepeatLength=39 seed=GCTCCCATCA Num.seqs=14  
Similarity=0.844839 0

GCTCCCATCANC CGGACGGCTGACCCATCGGGGATTGC

GCF\_900094975.1\_IMG-

taxon\_2617270721\_annotated\_assembly\_genomic.fna\_4:1240438-1241134

Satlength=697 Nr of Repeats=13 RepeatLength=39 seed=GGCTGACCCA

Num.seqs=12 Similarity=0.864802 18

GCTCCCATCACTCCGACGGCTGACCCATCGGGGATTGT

\*\*\*\*\*

Consensus:

GCTCCCATCACTCCGACGGCTGACCCATCGGGGATTGc

>Bacillus\_Fam\_639\_37\_2 Nr. of seq. 2 Alignment length(with gaps) = 37  
Alignment score = 0.662162

GCF\_000242895.2\_ASM24289v3\_genomic.fna\_1:2712624-2712861 Satlength=238 Nr  
of Repeats=5 RepeatLength=36 seed=TGTCTGGAT Num.seqs=3  
Similarity=0.678063 0

TGTCTGGATAACCTCCCATGCCACCGTACCCGCCG-

GCF\_001591665.1\_ASM159166v1\_genomic.fna\_7:16103-16484 Satlength=382 Nr of  
Repeats=8 RepeatLength=36 seed=ATCCTCCCAT Num.seqs=6 Similarity=0.823423

9 TG-CCTGGGTATCCTCCCATGCCTCCATAACCACCCA

\*\* \*\*\*\*\* \*\* \*\* \*\*

Consensus:

TGtCCTGGaTAaCCTCCCATGCCaCCaTAaCCaCCca

>Bacillus\_Fam\_640\_37\_2 Nr. of seq. 2 Alignment length(with gaps) = 37  
Alignment score = 0.603604

GCF\_000712615.1\_ASM71261v1\_genomic.fna\_8:125406-125946 Satlength=541 Nr  
of Repeats=15 RepeatLength=36 seed=TACGGGACCA Num.seqs=15  
Similarity=0.931532 0

TACGGGACCAACGGGAG-AACCGGGATCTAGCGGAGT

Rev.of\_GCF\_000715205.1\_SOAPdenovo\_v1.05\_genomic.fna\_19:59022-60552

Satlength=1531 Nr of Repeats=42 RepeatLength=36 seed=GCTCCGGTTG

Num.seqs=34 Similarity=0.944808 0  
CACGGGAGCCACGGGAGCAACC-GGTCCAACCGGAGC

\*\*\*\*\* \* \*\*\*\*\* \*\*\*\* \* \* \*\*\*\*\*

Consensus:

cACGGGACCaACGGGAGcAACCgGGacCaAcCGGAGc

>Bacillus\_Fam\_641\_37\_2 Nr. of seq. 2 Alignment length(with gaps) = 37  
Alignment score = 0.747748  
GCF\_001578185.1\_ASM157818v1\_genomic.fna\_1:1822790-1822970 Satlength=181  
Nr of Repeats=5 RepeatLength=36 seed=TGCCACTGTT Num.seqs=5  
Similarity=0.722522 0  
TGCCACTGTTGCCAA-GTANCGTGAGGATGGTGCTGA  
GCF\_000025825.1\_ASM2582v1\_genomic.fna\_1:3261851-3262067 Satlength=217 Nr  
of Repeats=5 RepeatLength=36 seed=TGCCATTGAT Num.seqs=4  
Similarity=0.594595  
0 TGCCACTGATGCCAAGGTACNGTATGGATGCTGCTGA

\*\*\*\*\* \*\*\*\*\* \*\*\* \*\* \*\*\*\*\* \*\*\*\*\*

Consensus:

TGCCACTGaTGCCAAgGTAccGTaaGGATGcTGCTGA

>Bacillus\_Fam\_642\_36\_2 Nr. of seq. 2 Alignment length(with gaps) = 36  
Alignment score = 0.666667  
GCF\_000007825.1\_ASM782v1\_genomic.fna\_1:2324878-2325328 Satlength=451 Nr  
of Repeats=12 RepeatLength=36 seed=ACCGGAGCAA Num.seqs=9  
Similarity=0.836420  
0 ACCGGAGCAACAGGCCCGACTGGAATAACGGGCCCA  
Rev.of\_GCF\_001038845.1\_ASM103884v1\_genomic.fna\_46:6167-6671 Satlength=505  
Nr of Repeats=11 RepeatLength=36 seed=CCCGTGGCTC Num.seqs=8  
Similarity=0.851852 14  
ACGGGAGCCACGGGTTCAACGGGAGTAACTGGCCCA

\*\* \*\*\*\*\* \*\* \* \* \*\* \*\* \*\*\*\*\* \*\*\*\*\*

Consensus:

ACcGGAGCaACaGGccCaACgGGAaTAACgGGCCCA

>Bacillus\_Fam\_643\_36\_2 Nr. of seq. 2 Alignment length(with gaps) = 36  
Alignment score = 0.898148  
GCF\_000008425.1\_ASM842v1\_genomic.fna\_1:1177079-1177205 Satlength=127 Nr  
of Repeats=4 RepeatLength=36 seed=AAAAGCAAGA Num.seqs=3  
Similarity=0.777778  
0 AAAAGCAAGAAACCCGATGACTGCAAAAAGCCTGAC  
GCF\_000408885.1\_ASM40888v1\_genomic.fna\_1:1277423-1277564 Satlength=142 Nr  
of Repeats=5 RepeatLength=36 seed=AAAAGCAAGA Num.seqs=3  
Similarity=0.690058 0  
AAAAGCAAGAAACCTGATGACTGCAAAAACNGAC

\*\*\*\*\* \*\*\*\*\* \*\* \*\*\*

Consensus:

AAAAGCAAGAAACCcGATGACTGCAAAAAaCctGAC

>Bacillus\_Fam\_644\_36\_2 Nr. of seq. 2 Alignment length(with gaps) = 36  
Alignment score = 0.925926  
GCF\_000025805.1\_ASM2580v1\_genomic.fna\_1:706167-706311 Satlength=145 Nr of  
Repeats=5 RepeatLength=36 seed=GAAATTAAGC Num.seqs=3 Similarity=0.861862  
0 GAAATTAAGCAGGAAAAAGATATAGGAATTAaaaaG  
GCF\_000025825.1\_ASM2582v1\_genomic.fna\_1:700384-700528 Satlength=145 Nr of  
Repeats=4 RepeatLength=36 seed=CAGGAAAAAG Num.seqs=4 Similarity=0.938272  
9 GAAATTAACAGGAAAAAGATATAGGAATTAAGAAG

\*\*\*\*\*  
Consensus:

GAAATTAaaCAGGAAAAAGATATAGGAATTAaaAAG

>Bacillus\_Fam\_645\_36\_2 Nr. of seq. 2 Alignment length(with gaps) = 36  
Alignment score = 0.925926  
GCF\_000025805.1\_ASM2580v1\_genomic.fna\_1:2966155-2966335 Satlength=181 Nr  
of Repeats=5 RepeatLength=36 seed=TCTTTTGTAG Num.seqs=5  
Similarity=0.970370  
0 TCTTTTGTAGCTTGTTGAGCTTGAGCCTGCTGCTGC  
GCF\_000025825.1\_ASM2582v1\_genomic.fna\_1:2943369-2943663 Satlength=295 Nr  
of Repeats=8 RepeatLength=36 seed=GCTTGAGCTT Num.seqs=7  
Similarity=0.978836  
18 TCTTTTGTAGCCTGTTGAGCTTGAGCTTGCTGCTGC

\*\*\*\*\*  
Consensus:

TCTTTTGTAGCcTGTTGAGCTTGAGCcTGCTGCTGC

>Bacillus\_Fam\_646\_36\_2 Nr. of seq. 2 Alignment length(with gaps) = 36  
Alignment score = 1.000000  
GCF\_000153365.1\_ASM15336v1\_genomic.fna\_18:445614-445902 Satlength=289 Nr  
of Repeats=7 RepeatLength=36 seed=GGTCCTTGAA Num.seqs=6  
Similarity=0.790390  
0 GGTCCTTGAACCCCTTGTTGTCCTTGATCTCCTTGC  
Rev.of\_GCF\_000473245.1\_ASM47324v1\_genomic.fna\_1:507480-507768  
Satlength=289 Nr of Repeats=7 RepeatLength=36 seed=TTCAAGGACC Num.seqs=6  
Similarity=0.790390 10  
GGTCCTTGAACCCCTTGTTGTCCTTGATCTCCTTGC

\*\*\*\*\*  
Consensus:

GGTCCTTGAACCCCTTGTTGTCCTTGATCTCCTTGC

>Bacillus\_Fam\_647\_36\_2 Nr. of seq. 2 Alignment length(with gaps) = 36  
Alignment score = 0.944444  
GCF\_000153365.1\_ASM15336v1\_genomic.fna\_74:62534-62903 Satlength=370 Nr of  
Repeats=10 RepeatLength=36 seed=CAAGGATCAA Num.seqs=9

Similarity=0.802469  
0 CAAGGATCAACTGGNGCNCAGGGATCCCAAGGACCG  
GCF\_000473245.1\_ASM47324v1\_genomic.fna\_1:2119185-2119554 Satlength=370 Nr  
of Repeats=10 RepeatLength=36 seed=CAAGGATCAA Num.seqs=9  
Similarity=0.802469 0  
CAAGGATCAACTGGNGCNCAGGGATCCCAAGGACCG

\*\*\*\*\*  
Consensus:

CAAGGATCAACTGGNGCNCAGGGATCCCAAGGACCG

>Bacillus\_Fam\_648\_36\_2 Nr. of seq. 2 Alignment length(with gaps) = 36  
Alignment score = 0.666667  
GCF\_000161455.1\_ASM16145v1\_genomic.fna\_1:2079145-2079325 Satlength=181 Nr  
of Repeats=5 RepeatLength=36 seed=GGGAATACAA Num.seqs=5  
Similarity=0.800000 0  
GGGAATACAACTCCGCCAGGCAGTGGAATGGCCAA  
Rev.of\_GCF\_000832605.1\_ASM83260v1\_genomic.fna\_1:3388209-3388497  
Satlength=289 Nr of Repeats=8 RepeatLength=36 seed=TGTATTTCCT Num.seqs=8  
Similarity=0.866402 9  
GGAAATACAACGCCCAAACAATGGTAGAGGCGAA

\*\* \*\*\*\*\* \*\* \*\*\* \* \*\*\* \*\*  
Consensus:

GGaAATACAACgCCGCCAaaCAaTGGaAaaGGCcAA

>Bacillus\_Fam\_649\_36\_2 Nr. of seq. 2 Alignment length(with gaps) = 36  
Alignment score = 0.962963  
GCF\_000217835.1\_ASM21783v1\_genomic.fna\_1:1229797-1230013 Satlength=217 Nr  
of Repeats=5 RepeatLength=36 seed=GCAACAACCG Num.seqs=4  
Similarity=0.919753 0  
GCAACAACCGGAATAACGGGAACGGCCAGGCCGCAA  
GCF\_000832905.1\_ASM83290v1\_genomic.fna\_1:203662-203842 Satlength=181 Nr  
of Repeats=5 RepeatLength=36 seed=GCAACAACCG Num.seqs=5  
Similarity=0.859259  
0 GCAACAACCGGAATAACGGAAACGGCCAGGCCGCAA

\*\*\*\*\*  
Consensus:

GCAACAACCGGAATAACGGaAACGGCCAGGCCGCAA

>Bacillus\_Fam\_650\_36\_2 Nr. of seq. 2 Alignment length(with gaps) = 36  
Alignment score = 0.703704  
GCF\_000751775.1\_A1A\_genomic.fna\_79:77245-77425 Satlength=181 Nr of  
Repeats=5 RepeatLength=36 seed=CATTGATTGC Num.seqs=5 Similarity=0.855556  
0 CATTGATTGCCGTGCCACCATTCGGGCCTTGACCTC  
GCF\_001420715.1\_ASM142071v1\_genomic.fna\_23:27567-27783 Satlength=217 Nr  
of Repeats=4 RepeatLength=36 seed=CCTCCTTGGG Num.seqs=3  
Similarity=0.901235  
32 CTTGGGCTGCAGTTCCACCATTCGGACCTTGGCCTC

\* \* \* \*\*\* \*\* \*\*\*\*\* \*\*\*\*\* \*

Consensus:

CaTgGacTGCaGTgCCACCATTCCGgACCTTGaCCTC

>Bacillus\_Fam\_651\_36\_2 Nr. of seq. 2 Alignment length(with gaps) = 36

Alignment score = 0.629630

GCF\_000769555.1\_ASM76955v1\_genomic.fna\_1:1273558-1274494 Satlength=937 Nr  
of Repeats=26 RepeatLength=36 seed=CGCCAGTAGC Num.seqs=26

Similarity=0.918405

0

CGCCAGTAGCGCCGGTAAATCCGGTCGGTCCGGTAA

Rev.of\_GCF\_001578205.1\_ASM157820v1\_genomic.fna\_1:2833063-2833531

Satlength=469 Nr of Repeats=15 RepeatLength=36 seed=CTACTGGCGC

Num.seqs=11 Similarity=0.981145

9 CGCCAGTAGCCCCTGAAGGACCAGTAGGACCGGTAG

\*\*\*\*\* \*\* \* \* \*\* \*\* \*\* \*\*\*\*\*

Consensus:

CGCCAGTAGCcCCgGaAaaaCCaGTaGGaCCGGTAa

>Bacillus\_Fam\_652\_36\_2 Nr. of seq. 2 Alignment length(with gaps) = 36

Alignment score = 0.666667

GCF\_001590785.1\_ASM159078v1\_genomic.fna\_10:48242-48455 Satlength=214 Nr  
of Repeats=6 RepeatLength=36 seed=GGACCGACAG Num.seqs=4

Similarity=0.864198

0 GGACCGACAGGAGCAACAGGAATAGCAGGAATCACC

GCF\_002019765.1\_ASM201976v1\_genomic.fna\_1:2106260-2106764 Satlength=505

Nr of Repeats=10 RepeatLength=36 seed=TTAGACGGTG Num.seqs=6

Similarity=0.883951

21

GGTGCTACAGGAGCAACAGGATTAGACGGTGTCCT

\*\* \* \*\*\*\*\* \*\* \*\* \*\*\*\*\*

Consensus:

GGacCgACAGGAGCAACAGGAaTAGaaGGaaTCACc

>Bacillus\_Fam\_653\_36\_2 Nr. of seq. 2 Alignment length(with gaps) = 36

Alignment score = 0.824074

GCF\_001887185.1\_ASM188718v1\_genomic.fna\_215:57616-57874 Satlength=259 Nr  
of Repeats=7 RepeatLength=36 seed=AGTACAGCAA Num.seqs=5

Similarity=0.718018

0 AGTACAGCAAACGGAAGAAATGCAGCCGAGAGTANC

Rev.of\_GCF\_002009555.1\_ASM200955v1\_genomic.fna\_223:6085-6232

Satlength=148 Nr of Repeats=4 RepeatLength=36 seed=TTGCTGTACT Num.seqs=3

Similarity=0.728395

10

AGTACAGCAAGTGGAAGAAGAGCAGCCGAGAGTACC

\*\*\*\*\* \*\*\*\*\* \*\*\*\*\* \*

Consensus:

AGTACAGCAAacGGAAGAAaaGCAGCCGAGAGTAcC



>Bacillus\_Fam\_654\_34\_2 Nr. of seq. 2 Alignment length(with gaps) = 34  
Alignment score = 1.000000  
GCF\_000153365.1\_ASM15336v1\_genomic.fna\_18:81509-81679 Satlength=171 Nr of  
Repeats=5 RepeatLength=34 seed=TCTGTCCCCT Num.seqs=5 Similarity=0.890196  
0 TCTGTCCCCTTGGCCCAGTTTTTCGGGCCAGGGGG  
Rev.of\_GCF\_000473245.1\_ASM47324v1\_genomic.fna\_1:870777-870947  
Satlength=171 Nr of Repeats=5 RepeatLength=34 seed=AAGGGGACAG Num.seqs=5  
Similarity=0.890196 11  
TCTGTCCCCTTGGCCCAGTTTTTCGGGCCAGGGGG

\*\*\*\*\*

Consensus:

TCTGTCCCCTTGGCCCAGTTTTTCGGGCCAGGGGG

>Bacillus\_Fam\_655\_33\_2 Nr. of seq. 2 Alignment length(with gaps) = 33  
Alignment score = 1.000000  
GCF\_001243895.1\_Bacillus\_testis\_genomic.fna\_9:552036-552300 Satlength=265  
Nr of Repeats=8 RepeatLength=33 seed=CGGCGGGAAT Num.seqs=8  
Similarity=0.874459 0  
CGGCGGGAATGCCGGAATGCCAGGTCAAGGAAG  
GCF\_001243895.1\_Bacillus\_testis\_genomic.fna\_9:552088-552451 Satlength=364  
Nr of Repeats=11 RepeatLength=33 seed=CCAGGCCAAG Num.seqs=11  
Similarity=0.841322 19  
CGGCGGGAATGCCGGAATGCCAGGTCAAGGAAG

\*\*\*\*\*

Consensus:

CGGCGGGAATGCCGGAATGCCAGGTCAAGGAAG

>Bacillus\_Fam\_656\_30\_2 Nr. of seq. 2 Alignment length(with gaps) = 30  
Alignment score = 1.000000  
GCF\_000759675.1\_ASM75967v1\_genomic.fna\_60:16-166 Satlength=151 Nr of  
Repeats=5 RepeatLength=30 seed=AAAATGAAAG Num.seqs=5 Similarity=0.902222  
0 AAAATGAAAGAACTCCAAATGTAGTACCG  
Rev.of\_GCF\_000759675.1\_ASM75967v1\_genomic.fna\_80:1917-2127 Satlength=211  
Nr of Repeats=7 RepeatLength=30 seed=TTCTTTCATT Num.seqs=7  
Similarity=0.809524 12  
AAAATGAAAGAACTCCAAATGTAGTACCG

\*\*\*\*\*

Consensus:

AAAATGAAAGAACTCCAAATGTAGTACCG

>Bacillus\_Fam\_657\_28\_2 Nr. of seq. 2 Alignment length(with gaps) = 28  
Alignment score = 0.601190  
GCF\_000712615.1\_ASM71261v1\_genomic.fna\_14:9252-9900 Satlength=649 Nr of  
Repeats=24 RepeatLength=27 seed=AGCGAAGCAA Num.seqs=24  
Similarity=0.973341  
0 AGCGAAGCAAAAGCAACAAGAAGAACA-  
Rev.of\_GCF\_001243895.1\_Bacillus\_testis\_genomic.fna\_9:2243301-2243598  
Satlength=298 Nr of Repeats=11 RepeatLength=27 seed=CGTTGTTGCT

Num.seqs=11 Similarity=0.910213  
CGCCAAGCTCAAGC-ACAAGAGCAACAA

2

\*\* \*\*\*\* \* \* \* \* \*

Consensus:

aGCcAAGCaaAAGCaACAAGAcAACAA

>Bacillus\_Fam\_658\_27\_2 Nr. of seq. 2 Alignment length(with gaps) = 27  
Alignment score = 0.697531  
GCF\_001877785.1\_PlanoSAMM\_genomic.fna\_139:52829-52954 Satlength=126 Nr of  
Repeats=5 RepeatLength=25 seed=TTGTACCTGG Num.seqs=5 Similarity=0.537179  
0 TTGTACCTGGTACATNG-GNG-TNGAT  
GCF\_001877785.1\_PlanoSAMM\_genomic.fna\_139:112839-112939 Satlength=101 Nr  
of Repeats=4 RepeatLength=25 seed=TGTACCTGGT Num.seqs=4  
Similarity=0.594246  
0 -TGTACCTGGTACATGGAGCGTTTGAT

\*\*\*\*\* \* \* \* \* \*

Consensus:

tTGTACCTGGTACATgGaGcGtTtGAT

>Bacillus\_Fam\_659\_27\_2 Nr. of seq. 2 Alignment length(with gaps) = 27  
Alignment score = 0.654321  
GCF\_000831065.1\_ASM83106v1\_genomic.fna\_1:4229089-4229503 Satlength=415 Nr  
of Repeats=14 RepeatLength=27 seed=GCTCCCGTTG Num.seqs=9  
Similarity=0.888889 12  
GTTGAACCTGTCGCTCCCGTTGGACCT  
GCF\_001712755.1\_ASM171275v1\_genomic.fna\_23:0-188 Satlength=189 Nr of  
Repeats=7 RepeatLength=27 seed=GCTGTTCCAG Num.seqs=7 Similarity=0.971781  
12 CCTGTCGCTCCAGCTGTTCCAGTTGCT

\*\* \*\*\* \* \*\* \*\*

Consensus:

cCTccaGCTcccccaGgacCTccTGaa

>Bacillus\_Fam\_660\_24\_2 Nr. of seq. 2 Alignment length(with gaps) = 24  
Alignment score = 0.631944  
GCF\_001591665.1\_ASM159166v1\_genomic.fna\_19:22435-22519 Satlength=85 Nr of  
Repeats=4 RepeatLength=21 seed=GGACAGTAAA Num.seqs=4 Similarity=0.661376  
0 GGACA-GTAAAA-CANAAAAAGT-  
Rev.of\_GCF\_000496285.1\_ASM49628v1\_genomic.fna\_1:1628788-1628908  
Satlength=121 Nr of Repeats=4 RepeatLength=24 seed=ACTTCTTTTT Num.seqs=3  
Similarity=0.814815 2  
GTACAGGTAAAACCACAAAAAGAA

\* \*\*\* \* \* \* \*

Consensus:

GgACAgGTAAAcCAcAAAAAGaa

>Bacillus\_Fam\_661\_24\_2 Nr. of seq. 2 Alignment length(with gaps) = 24  
Alignment score = 0.833333  
GCF\_000005825.2\_ASM582v2\_genomic.fna\_1:1602362-1602482 Satlength=121 Nr of Repeats=5 RepeatLength=24 seed=ATGGCCGGAG Num.seqs=5  
Similarity=0.911111  
0 ATGGCCGGAGCGAACATGGGGCCA  
GCF\_000474275.1\_Bmar1.0\_genomic.fna\_8:180773-180917 Satlength=145 Nr of Repeats=6 RepeatLength=24 seed=ATGGCAGGAG Num.seqs=6 Similarity=0.907407  
0 ATGGCAGGAGCGAACATGGCGCCG

\*\*\*\*\*

Consensus:

ATGGCaGGAGCGAACATGGcGCCa

>Bacillus\_Fam\_662\_24\_2 Nr. of seq. 2 Alignment length(with gaps) = 24  
Alignment score = 0.944444  
GCF\_000008505.1\_ASM850v1\_genomic.fna\_1:1072242-1072386 Satlength=145 Nr of Repeats=6 RepeatLength=24 seed=CAGAAAAGAA Num.seqs=4  
Similarity=0.632222  
0 CAGAAAAGAATCAAAAACAGAGA  
GCF\_000831065.1\_ASM83106v1\_genomic.fna\_1:895901-896096 Satlength=196 Nr of Repeats=5 RepeatLength=24 seed=AGAAAAAAT Num.seqs=3  
Similarity=0.740741  
1 CAGAAAAGAATCAAAAAGCAGAGA

\*\*\*\*\*

Consensus:

CAGAAAAGAATCAAAAaCAGAGA

>Bacillus\_Fam\_663\_23\_2 Nr. of seq. 2 Alignment length(with gaps) = 23  
Alignment score = 0.666667  
GCF\_001439915.1\_ASM143991v1\_genomic.fna\_122:1-121 Satlength=121 Nr of Repeats=6 RepeatLength=20 seed=TATTTGCGTC Num.seqs=6 Similarity=0.590821  
0 TATTTGCGTCGTCCTCCA--C-AT  
Rev.of\_GCF\_001439915.1\_ASM143991v1\_genomic.fna\_83:14858-15120  
Satlength=263 Nr of Repeats=11 RepeatLength=20 seed=CGACGCAAAT  
Num.seqs=8 Similarity=0.573499  
11 TATTTGCGTCGNTTCANACNAT

\*\*\*\*\* \* \*\*\* \* \*\*

Consensus:

TATTTGCGTCGgTcCCAnaCnAT

>Bacillus\_Fam\_664\_23\_2 Nr. of seq. 2 Alignment length(with gaps) = 23  
Alignment score = 0.717391  
GCF\_900094975.1\_IMG-  
taxon\_2617270721\_annotated\_assembly\_genomic.fna\_4:1334318-1334418  
Satlength=101 Nr of Repeats=5 RepeatLength=20 seed=ATTAGGATCG Num.seqs=5  
Similarity=0.725397 0 ATTAGGATCGT--ATTCTG-GA  
Rev.of\_GCF\_900094975.1\_IMG-  
taxon\_2617270721\_annotated\_assembly\_genomic.fna\_4:483549-483629

Satlength=81 Nr of Repeats=4 RepeatLength=20 seed=TACGATCCTA Num.seqs=4  
Similarity=0.636364 11 -TTAGGATCGTAAATTTCTGAGA

\*\*\*\*\* \*\*

Consensus:

aTTAGGATCGTaaATTTCTGaGA

>Bacillus\_Fam\_665\_23\_2 Nr. of seq. 2 Alignment length(with gaps) = 23

Alignment score = 0.615942

GCF\_001636315.1\_ASM163631v1\_genomic.fna\_1:1446486-1446570 Satlength=85 Nr of Repeats=4 RepeatLength=21 seed=CCAACGGCG Num.seqs=4

Similarity=0.862434 0

CCAACGGCGGAT-A-CACGCTC

Rev.of\_GCF\_000612665.1\_FF4\_genomic.fna\_75:18910-19034 Satlength=125 Nr of Repeats=5 RepeatLength=21 seed=ATCCGCTAGT Num.seqs=4 Similarity=0.576389

12 -CAACTAGCGGATAACCNCGATC

\*\*\*\*\* \* \* \* \*

Consensus:

cCAACTaGCGGATaAcCaCGaTC

>Bacillus\_Fam\_666\_23\_2 Nr. of seq. 2 Alignment length(with gaps) = 23

Alignment score = 0.760870

GCF\_001648575.1\_ASM164857v1\_genomic.fna\_3:346105-346468 Satlength=364 Nr of Repeats=10 RepeatLength=21 seed=TTTATTTTCC Num.seqs=9

Similarity=0.555135 0

TTTATTTTCCATTNCAGCCG-A-

GCF\_001648575.1\_ASM164857v1\_genomic.fna\_3:354189-354315 Satlength=127 Nr of Repeats=6 RepeatLength=21 seed=TTTATTTTCC Num.seqs=6

Similarity=0.461111

0 TTTATTTTCCATTCAAGCCGNAT

\*\*\*\*\* \*

Consensus:

TTTATTTTCCATTcaAGCCGnAt

>Bacillus\_Fam\_667\_23\_2 Nr. of seq. 2 Alignment length(with gaps) = 23

Alignment score = 0.666667

GCF\_000934845.1\_ASM93484v1\_genomic.fna\_5:25497-25581 Satlength=85 Nr of Repeats=4 RepeatLength=21 seed=ATTCCGCGAA Num.seqs=4 Similarity=0.468750

0 ATTCCGCGAAANAACC-AGAATA

GCF\_001315165.1\_ASM131516v1\_genomic.fna\_10:42593-42718 Satlength=126 Nr of Repeats=5 RepeatLength=21 seed=ATTCCGCGAA Num.seqs=4

Similarity=0.471014

0 ATTCCGCGAAA-AACNAACGATA

\*\*\*\*\* \* \* \*

Consensus:

ATTCCGCGAAAnAACcaAcaATA

>Bacillus\_Fam\_668\_22\_2 Nr. of seq. 2 Alignment length(with gaps) = 22  
Alignment score = 0.772727  
GCF\_000007845.1\_ASM784v1\_genomic.fna\_1:4827415-4827495 Satlength=81 Nr of  
Repeats=4 RepeatLength=20 seed=TATATCAGCG Num.seqs=4 Similarity=0.593915  
14 AGCGAAACTCCAAA--TATATC  
GCF\_000831065.1\_ASM83106v1\_genomic.fna\_1:4391098-4391298 Satlength=201 Nr  
of Repeats=9 RepeatLength=20 seed=TTATATCAGC Num.seqs=8  
Similarity=0.688312 14  
AGCGCAACTCCCAATTTATATC

\*\*\*\*\* \*\*

Consensus:

tTATATCAGCGaAACTCCaAAt

>Bacillus\_Fam\_669\_22\_2 Nr. of seq. 2 Alignment length(with gaps) = 22  
Alignment score = 0.621212  
GCF\_000311725.1\_ASM31172v1\_genomic.fna\_3:434751-434853 Satlength=103 Nr  
of Repeats=5 RepeatLength=20 seed=ATTCCGGAAC Num.seqs=3  
Similarity=0.814815  
0 -ATTCCGGAACTTTT-GGATTA  
GCF\_000311725.1\_ASM31172v1\_genomic.fna\_2:435289-435392 Satlength=104 Nr  
of Repeats=5 RepeatLength=21 seed=AATTCCGGAA Num.seqs=3  
Similarity=0.830688  
0 AATTCCGTAACTTTTCGTGTT-

\*\*\*\*\* \* \*\*

Consensus:

aATTCCGgAACTTTTcGgaTTa

>Bacillus\_Fam\_670\_22\_2 Nr. of seq. 2 Alignment length(with gaps) = 22  
Alignment score = 0.643939  
GCF\_000331575.1\_ASM33157v1\_genomic.fna\_3:82032-82150 Satlength=119 Nr of  
Repeats=6 RepeatLength=20 seed=CTTACATATA Num.seqs=4 Similarity=1.000000  
0 CTTAC-AT-ATATTTTGGGTC  
Rev.of\_GCF\_900156875.1\_PRJEB18969\_genomic.fna\_9:2524-2673 Satlength=150  
Nr of Repeats=7 RepeatLength=21 seed=GTTATAGTTA Num.seqs=6  
Similarity=0.932275 10  
-TAACTATAACATTTTTGGGTC

\* \*\* \* \*\*\*\*\*

Consensus:

cTaActATaAcATTTTTGGGTC

>Bacillus\_Fam\_671\_22\_2 Nr. of seq. 2 Alignment length(with gaps) = 22  
Alignment score = 0.628788  
GCF\_000245315.1\_ASM24531v1\_genomic.fna\_68:3612-3750 Satlength=139 Nr of  
Repeats=7 RepeatLength=21 seed=AAAAAGTATT Num.seqs=6 Similarity=0.805291  
0 -AAAAAGCATTATGATCATGAC  
Rev.of\_GCF\_001375535.1\_Bacillus\_niameyensis\_genomic.fna\_6:2731414-2731540  
Satlength=127 Nr of Repeats=4 RepeatLength=21 seed=TTTTCTCTTC Num.seqs=3

Similarity=0.724868  
GNTGAAGAG

4 AAAAAAGCATTA-

\*\*\*\*\* \* \* \* \*\*

Consensus:

aAAAAAGCATTTatGaTcAaGAc

>Bacillus\_Fam\_672\_22\_2 Nr. of seq. 2 Alignment length(with gaps) = 22  
Alignment score = 0.628788  
GCF\_000305495.1\_BacPsy2.0\_genomic.fna\_37:40246-40493 Satlength=248 Nr of  
Repeats=6 RepeatLength=21 seed=TATTCCCGTC Num.seqs=5 Similarity=0.513636  
0 TATTCCCGTCTGCGNANGNTG-  
Rev.of\_GCF\_000305495.1\_BacPsy2.0\_genomic.fna\_243:5857-5941 Satlength=85  
Nr of Repeats=4 RepeatLength=21 seed=AGACGGGAAT Num.seqs=4  
Similarity=0.520202 11  
TATTCCCGTCTGAGATGGAAGT

\*\*\*\*\* \* \* \*

Consensus:

TATTCCCGTCTGaGaagGaaGt

>Bacillus\_Fam\_673\_22\_2 Nr. of seq. 2 Alignment length(with gaps) = 22  
Alignment score = 0.681818  
GCF\_000305495.1\_BacPsy2.0\_genomic.fna\_66:16974-17058 Satlength=85 Nr of  
Repeats=4 RepeatLength=21 seed=TTATTCCCGT Num.seqs=4 Similarity=0.613636  
0 TTATTCCCGTCTC-GAATAAGC  
GCF\_000305495.1\_BacPsy2.0\_genomic.fna\_259:12228-12312 Satlength=85 Nr of  
Repeats=4 RepeatLength=21 seed=TATTCCCGTC Num.seqs=4 Similarity=0.427083  
1 TTATTCCCGTCTCATCATGNGC

\*\*\*\*\* \*\* \*\*

Consensus:

TTATTCCCGTCTCagaATaaGC

>Bacillus\_Fam\_674\_22\_2 Nr. of seq. 2 Alignment length(with gaps) = 22  
Alignment score = 0.696970  
GCF\_000307875.1\_BABA1.0\_genomic.fna\_7:26272-26417 Satlength=146 Nr of  
Repeats=7 RepeatLength=21 seed=TGCGACAGTA Num.seqs=6 Similarity=0.658586  
0 TGCGACAGTAAAGCGTGGC-TA  
GCF\_000307875.1\_BABA1.0\_genomic.fna\_58:51271-51373 Satlength=103 Nr of  
Repeats=5 RepeatLength=21 seed=TCCGACAGTA Num.seqs=4 Similarity=0.584541  
0 TCCGACAGTAACG-GTGGCTTA

\* \*\*\*\*\* \* \*\*\*\*\* \*\*

Consensus:

TcCGACAGTAAaGcGTGGCtTA

>Bacillus\_Fam\_675\_22\_2 Nr. of seq. 2 Alignment length(with gaps) = 22  
Alignment score = 0.674242

GCF\_000311725.1\_ASM31172v1\_genomic.fna\_4:432525-432628 Satlength=104 Nr  
of Repeats=5 RepeatLength=21 seed=TAATTCGGGA Num.seqs=3  
Similarity=0.724868  
0 TAATTCGGGAACCTTTNACCCA-  
GCF\_000311725.1\_ASM31172v1\_genomic.fna\_1:120906-121010 Satlength=105 Nr  
of Repeats=5 RepeatLength=21 seed=AATTCGGAA Num.seqs=4  
Similarity=0.704545  
1 NAATTCGGGAACCTTCGAGCAT

\*\*\*\*\* \*\*  
Consensus:

tAATTCGGGAACCTTTcaacCat

>Bacillus\_Fam\_676\_22\_2 Nr. of seq. 2 Alignment length(with gaps) = 22  
Alignment score = 0.643939  
GCF\_000331575.1\_ASM33157v1\_genomic.fna\_1:755726-755838 Satlength=113 Nr  
of Repeats=4 RepeatLength=21 seed=CTTTATTGTC Num.seqs=3  
Similarity=0.601852  
0 CTTTATTGTCCGGAATTGC-CN  
Rev.of\_GCF\_000986785.1\_ASM98678v1\_genomic.fna\_10:73543-73915  
Satlength=373 Nr of Repeats=11 RepeatLength=21 seed=GACAATAGAA  
Num.seqs=7 Similarity=0.621212  
9 -TTTATTGTCCNGAAACGCTCT

\*\*\*\*\* \*\*\* \*\* \*  
Consensus:

cTTTATTGTCCgGAAacGcCt

>Bacillus\_Fam\_677\_22\_2 Nr. of seq. 2 Alignment length(with gaps) = 22  
Alignment score = 0.810606  
GCF\_000374345.1\_ASM37434v1\_genomic.fna\_22:48552-48902 Satlength=351 Nr of  
Repeats=13 RepeatLength=21 seed=TTCAATCCAA Num.seqs=9  
Similarity=0.640572  
0 TTCAATCCAAAA-TGGGNTTTT  
GCF\_000374345.1\_ASM37434v1\_genomic.fna\_31:31-340 Satlength=310 Nr of  
Repeats=11 RepeatLength=21 seed=TTCAATCCAA Num.seqs=7  
Similarity=0.619048  
0 TTCAATCCAAAAC-TGGGNTTT-

\*\*\*\*\*  
Consensus:

TTCAATCCAAAAC-TGGGNTTTt

>Bacillus\_Fam\_678\_22\_2 Nr. of seq. 2 Alignment length(with gaps) = 22  
Alignment score = 0.810606  
GCF\_000429705.1\_ASM42970v1\_genomic.fna\_1:195033-195200 Satlength=168 Nr  
of Repeats=7 RepeatLength=21 seed=CTAACTCGAC Num.seqs=5  
Similarity=0.694444  
0 CTAACTCGACTAAAGG-NGAGG  
GCF\_000429705.1\_ASM42970v1\_genomic.fna\_1:361409-361556 Satlength=148 Nr  
of Repeats=7 RepeatLength=21 seed=GCTAACTCGA Num.seqs=7

Similarity=0.863636  
20 CTAAC TCGACTAAAGGCGGAG-

\*\*\*\*\* \*\*\*

Consensus:

CTAAC TCGACTAAAGGcgGAGg

>Bacillus\_Fam\_679\_22\_2 Nr. of seq. 2 Alignment length(with gaps) = 22  
Alignment score = 0.666667  
GCF\_000429705.1\_ASM42970v1\_genomic.fna\_1:2283624-2283729 Satlength=106 Nr  
of Repeats=4 RepeatLength=21 seed=TTTAAACAGG Num.seqs=3  
Similarity=0.525253 0  
TTTAAACAGGTTNGCACG-NCG  
Rev.of\_GCF\_000429705.1\_ASM42970v1\_genomic.fna\_6:55774-55879 Satlength=106  
Nr of Repeats=4 RepeatLength=21 seed=AACCTGTTTA Num.seqs=3  
Similarity=0.830688 12  
TTTAAACAGGTTGG-AGGCGCG

\*\*\*\*\* \* \* \* \*\*

Consensus:

TTTAAACAGGTTgGcAcGcgCG

>Bacillus\_Fam\_680\_22\_2 Nr. of seq. 2 Alignment length(with gaps) = 22  
Alignment score = 0.674242  
GCF\_000430785.1\_ASM43078v1\_genomic.fna\_6:52001-52085 Satlength=85 Nr of  
Repeats=4 RepeatLength=21 seed=TTTACTATCC Num.seqs=4 Similarity=0.664141  
0 TTTACTATCCAAATTGAACCA-  
GCF\_001315085.1\_ASM131508v1\_genomic.fna\_12:91450-91534 Satlength=85 Nr of  
Repeats=4 RepeatLength=21 seed=TTTATGATCC Num.seqs=4 Similarity=0.809524  
0 TTTATGATCCAATT-AACCAA

\*\*\*\* \*\*\*\*\* \*\* \*\*\*\*\*

Consensus:

TTTAcgATCCAAaTTgAACCAa

>Bacillus\_Fam\_681\_22\_2 Nr. of seq. 2 Alignment length(with gaps) = 22  
Alignment score = 0.848485  
GCF\_000473245.1\_ASM47324v1\_genomic.fna\_1:4442972-4443056 Satlength=85 Nr  
of Repeats=4 RepeatLength=21 seed=GGAATGATTA Num.seqs=4  
Similarity=0.643939  
0 GGAATGATTATT-GGCGAATCC  
Rev.of\_GCF\_000153365.1\_ASM15336v1\_genomic.fna\_17:84758-84842 Satlength=85  
Nr of Repeats=4 RepeatLength=21 seed=ATAATCATTC Num.seqs=4  
Similarity=0.644928 11  
GGAATGATTATTCGCCGAATCC

\*\*\*\*\* \* \*\*\*\*\*

Consensus:

GGAATGATTATTcGcCGAATCC



>Bacillus\_Fam\_682\_22\_2 Nr. of seq. 2 Alignment length(with gaps) = 22  
Alignment score = 0.628788  
GCF\_000496285.1\_ASM49628v1\_genomic.fna\_1:367662-367830 Satlength=169 Nr  
of Repeats=7 RepeatLength=21 seed=ACTTCTCCTT Num.seqs=6  
Similarity=0.923810  
0 ACTTCTCCTTTTGGATCTGTC-  
Rev.of\_GCF\_000007845.1\_ASM784v1\_genomic.fna\_1:554769-555177 Satlength=409  
Nr of Repeats=15 RepeatLength=21 seed=AGAAGTTGAA Num.seqs=10  
Similarity=0.668182 6  
NCTTCTNTCTTTGGNTCTTTCA

\*\*\*\*\* \*\*\*\*\* \*\*\* \*\*

Consensus:

aCTTCTcccTTTGGaTCTgTCa

>Bacillus\_Fam\_683\_22\_2 Nr. of seq. 2 Alignment length(with gaps) = 22  
Alignment score = 0.727273  
GCF\_000612625.1\_JCE\_genomic.fna\_3:36022-36122 Satlength=101 Nr of  
Repeats=5 RepeatLength=21 seed=ATTCTACAAA Num.seqs=3 Similarity=0.661376  
0 ATTCTACAAAANT-AAAGANGA  
Rev.of\_GCF\_000612625.1\_JCE\_genomic.fna\_58:7998-8081 Satlength=84 Nr of  
Repeats=4 RepeatLength=21 seed=TTTGTAAGAA Num.seqs=3 Similarity=0.525253  
10 ATTCTACAAAAATCAAAG-GGA

\*\*\*\*\* \* \*\*\*\* \*\*

Consensus:

ATTCTACAAAAaTcAAAGagGA

>Bacillus\_Fam\_684\_22\_2 Nr. of seq. 2 Alignment length(with gaps) = 22  
Alignment score = 0.613636  
GCF\_000752035.1\_Bacillus\_rubiinfantis\_genomic.fna\_11:630800-630905  
Satlength=106 Nr of Repeats=4 RepeatLength=21 seed=GTTACTCCCG Num.seqs=3  
Similarity=0.767677 0  
GTTACTCCCGCATAG-CTGCTC  
GCF\_000752035.1\_Bacillus\_rubiinfantis\_genomic.fna\_15:11202-11572  
Satlength=371 Nr of Repeats=16 RepeatLength=21 seed=TTACTCCCGT  
Num.seqs=10 Similarity=0.802469  
1 GTTACTCCCGTATCGACTCCA-

\*\*\*\*\* \*\* \* \*\* \*

Consensus:

GTTACTCCCGcATaGaCTcCac

>Bacillus\_Fam\_685\_22\_2 Nr. of seq. 2 Alignment length(with gaps) = 22  
Alignment score = 0.727273  
GCF\_000986785.1\_ASM98678v1\_genomic.fna\_5:144649-145040 Satlength=392 Nr  
of Repeats=15 RepeatLength=21 seed=GCAAATAGAA Num.seqs=11  
Similarity=0.592496 12  
ANTNGG-AAANCGGCAAATAGA  
GCF\_000986785.1\_ASM98678v1\_genomic.fna\_4:84896-85225 Satlength=330 Nr of  
Repeats=12 RepeatLength=21 seed=GCAAATAGAA Num.seqs=8

TCGCAAATAAACAgGaTAaGAT

>Bacillus\_Fam\_689\_22\_2 Nr. of seq. 2 Alignment length(with gaps) = 22  
Alignment score = 0.643939  
GCF\_001591805.1\_ASM159180v1\_genomic.fna\_32:4437-4855 Satlength=419 Nr of  
Repeats=4 RepeatLength=21 seed=TTTTGTCTAT Num.seqs=3 Similarity=0.606061  
19 TTGTCTATTTTNNAGNTAG-TT  
GCF\_001591805.1\_ASM159180v1\_genomic.fna\_34:3058-3142 Satlength=85 Nr of  
Repeats=4 RepeatLength=21 seed=GTTTTGTCTA Num.seqs=4 Similarity=0.683081  
19 TTGTCTA-TTTTAATAGAGGTT

\*\*\*\*\* \* \* \*

Consensus:

gTTTTGTCTAtTTTtaAgagAG

>Bacillus\_Fam\_690\_22\_2 Nr. of seq. 2 Alignment length(with gaps) = 22  
Alignment score = 0.659091  
GCF\_001648575.1\_ASM164857v1\_genomic.fna\_62:153306-153390 Satlength=85 Nr  
of Repeats=4 RepeatLength=21 seed=AGTTCGTGCC Num.seqs=4  
Similarity=0.544974  
0 AGTTCGTGCCAAAATNAGACA-  
Rev.of\_GCF\_001648575.1\_ASM164857v1\_genomic.fna\_64:121834-121917  
Satlength=84 Nr of Repeats=4 RepeatLength=21 seed=GGCACGAACT Num.seqs=3  
Similarity=0.540404 10  
AGTTCGTGCCAAAA-CNGNCCG

\*\*\*\*\* \* \*

Consensus:

AGTTCGTGCCAAAAtcaGaCag

>Bacillus\_Fam\_691\_22\_2 Nr. of seq. 2 Alignment length(with gaps) = 22  
Alignment score = 0.750000  
GCF\_002019665.1\_ASM201966v1\_genomic.fna\_1:314590-315478 Satlength=889 Nr  
of Repeats=19 RepeatLength=21 seed=AGGTTCCTCAC Num.seqs=14  
Similarity=0.616883 0  
AGGTTCCTCACGCTTCTC-GNAT  
GCF\_002019665.1\_ASM201966v1\_genomic.fna\_1:3647860-3648050 Satlength=191  
Nr of Repeats=9 RepeatLength=21 seed=CACGCTTCTC Num.seqs=8  
Similarity=0.907029 6  
-GGTTCCTCACGCTTCTCAGCAA

\*\*\*\*\* \* \*

Consensus:

aGGTTCCTCACGCTTCTCaGcAa

>Bacillus\_Fam\_692\_22\_2 Nr. of seq. 2 Alignment length(with gaps) = 22  
Alignment score = 0.621212  
GCF\_002019665.1\_ASM201966v1\_genomic.fna\_1:3182387-3182471 Satlength=85 Nr  
of Repeats=4 RepeatLength=21 seed=AGGTTCCTCAC Num.seqs=4  
Similarity=0.465278 0  
AGGTTCCTCACGCTTCTC-CCTG

GCF\_002019665.1\_ASM201966v1\_genomic.fna\_1:4369800-4369884 Satlength=85 Nr  
of Repeats=4 RepeatLength=21 seed=AGGTTCTCAC Num.seqs=4  
Similarity=0.646465 0  
AGGTTCTCACATAACTCACNTG

\*\*\*\*\* \*\*\* \* \*\*

Consensus:

AGGTTCTCACagaaCTCaCtTG

>Bacillus\_Fam\_693\_22\_2 Nr. of seq. 2 Alignment length(with gaps) = 22  
Alignment score = 0.651515  
GCF\_900094975.1\_IMG-  
taxon\_2617270721\_annotated\_assembly\_genomic.fna\_3:36555-36709  
Satlength=155 Nr of Repeats=5 RepeatLength=21 seed=TTTGATAATA Num.seqs=3  
Similarity=0.574879 0 TTCGATAATAAACTTNG-  
ATT  
GCF\_900094975.1\_IMG-  
taxon\_2617270721\_annotated\_assembly\_genomic.fna\_4:286502-286606  
Satlength=105 Nr of Repeats=5 RepeatLength=21 seed=TTTTGATAAT Num.seqs=4  
Similarity=0.629630 20 TTTGATAAT-AAATTTGGAATT

\*\* \*\*\*\*\* \*\*\* \*\* \* \*\*\*

Consensus:

TTcGATAATaAAAcTTgGaATT

>Bacillus\_Fam\_694\_22\_2 Nr. of seq. 2 Alignment length(with gaps) = 22  
Alignment score = 0.795455  
GCF\_900103955.1\_IMG-  
taxon\_2617270767\_annotated\_assembly\_genomic.fna\_6:34473-34708  
Satlength=236 Nr of Repeats=5 RepeatLength=21 seed=TATACTTTAC Num.seqs=3  
Similarity=0.830688 0 -  
TATACTTTACTCCGATCTCTT  
GCF\_900103955.1\_IMG-  
taxon\_2617270767\_annotated\_assembly\_genomic.fna\_7:19890-20391  
Satlength=502 Nr of Repeats=6 RepeatLength=21 seed=CTATGCTTTA Num.seqs=4  
Similarity=0.743687 0 CTATGCTTTACTCCGATC-  
CTT

\*\*\* \*\*\*\*\* \*\*\*

Consensus:

cTATaCTTTACTCCGATCtCTT

>Bacillus\_Fam\_695\_21\_2 Nr. of seq. 2 Alignment length(with gaps) = 21  
Alignment score = 0.603175  
GCF\_001517135.1\_ASM151713v1\_genomic.fna\_21:91763-91907 Satlength=145 Nr  
of Repeats=8 RepeatLength=18 seed=AAGAACCTGA Num.seqs=8  
Similarity=0.936508  
0 AAGAACCTGATAACACA-G--  
GCF\_001645705.1\_ASM164570v1\_genomic.fna\_60:514544-514944 Satlength=401 Nr  
of Repeats=14 RepeatLength=20 seed=AAGAAGCCCA Num.seqs=10

Similarity=0.740388  
AAGAACCCCATAACTCANGCT

0

\*\*\*\*\*    \*\*\*\*\*    \*\* \*

Consensus:

AAGAACCccATAACaCAnGct

>Bacillus\_Fam\_696\_21\_2    Nr. of seq. 2 Alignment length(with gaps) = 21  
Alignment score = 0.603175  
GCF\_001636325.1\_ASM163632v1\_genomic.fna\_2:1329299-1329389 Satlength=91 Nr  
of Repeats=5 RepeatLength=18 seed=CAAGCTCAAA    Num.seqs=5  
Similarity=0.970370    0  
C-AAGCTCAAATGCCAATG--  
Rev.of\_GCF\_000612665.1\_FF4\_genomic.fna\_50:5-89 Satlength=85 Nr of  
Repeats=4 RepeatLength=21 seed=CCCATTTGGCA    Num.seqs=4 Similarity=0.773990  
0    CTACGGTCAGATGCCAATGGG

\* \* \*    \*\*\*    \*\*\*\*\*

Consensus:

CtAaGcTCaAATGCCAATGgg

>Bacillus\_Fam\_697\_21\_2    Nr. of seq. 2 Alignment length(with gaps) = 21  
Alignment score = 0.634921  
GCF\_001591465.1\_ASM159146v1\_genomic.fna\_71:19109-19211 Satlength=103 Nr  
of Repeats=5 RepeatLength=20 seed=TGCAAATAGA    Num.seqs=3  
Similarity=0.521739  
0    TGCAAATAGAACGCTTTTT--  
Rev.of\_GCF\_000986785.1\_ASM98678v1\_genomic.fna\_10:28785-29115  
Satlength=331 Nr of Repeats=10 RepeatLength=21 seed=TCTATTTGCC  
Num.seqs=6 Similarity=0.663636  
10    GGCAAATAGAACGAGGTTTCC

\*\*\*\*\*    \*\*\*

Consensus:

gGCAAATAGAACGaggTTTcc

>Bacillus\_Fam\_698\_21\_2    Nr. of seq. 2 Alignment length(with gaps) = 21  
Alignment score = 0.658730  
GCF\_900104555.1\_IMG-  
taxon\_2651870172\_annotated\_assembly\_genomic.fna\_24:29769-29949  
Satlength=181 Nr of Repeats=10 RepeatLength=18 seed=CTCCACCTTG  
Num.seqs=10 Similarity=0.690643    0  
CTCCACCTTGTGGATTG-GC-  
Rev.of\_GCF\_001591665.1\_ASM159166v1\_genomic.fna\_59:13286-13410  
Satlength=125 Nr of Repeats=6 RepeatLength=21 seed=CGCAAGTTGG    Num.seqs=5  
Similarity=0.707937    12  
CTCCAACCTTGCGGATAGAGCN

\*\*\*\*\*    \*\*\*\*\*    \*\*\*\*\*    \*    \*\*

Consensus:

CTCCAACTTGcGGATaGaGCn

>Bacillus\_Fam\_699\_21\_2 Nr. of seq. 2 Alignment length(with gaps) = 21  
Alignment score = 0.785714  
GCF\_000175075.1\_ASM17507v1\_genomic.fna\_5:45232-45332 Satlength=101 Nr of  
Repeats=5 RepeatLength=20 seed=ATATATCAAG Num.seqs=5 Similarity=0.625758  
0 ATATATCAAGAAATTTAG-GA  
GCF\_000175075.1\_ASM17507v1\_genomic.fna\_32:297990-298092 Satlength=103 Nr  
of Repeats=5 RepeatLength=20 seed=ATATCAAGAA Num.seqs=3  
Similarity=0.777778  
1 -TATATCAAGAAATTTGTGA

\*\*\*\*\* \* \*\*

Consensus:

aTATATCAAGAAATTTaGtGA

>Bacillus\_Fam\_700\_21\_2 Nr. of seq. 2 Alignment length(with gaps) = 21  
Alignment score = 0.626984  
GCF\_000175075.1\_ASM17507v1\_genomic.fna\_41:62510-62591 Satlength=82 Nr of  
Repeats=4 RepeatLength=20 seed=TCGCCCGTAA Num.seqs=3 Similarity=0.712121  
0 TCGCCCGTAAATCTCAAAAN-  
GCF\_001877785.1\_PlanoSAMM\_genomic.fna\_96:320102-320182 Satlength=81 Nr of  
Repeats=4 RepeatLength=20 seed=TTTCGCCCTT Num.seqs=4 Similarity=0.648148  
18 TCGCCCTTAAATC-CGANATT

\*\*\*\*\* \* \* \*

Consensus:

TCGCCCGTAAATCtCaAaAtt

>Bacillus\_Fam\_701\_21\_2 Nr. of seq. 2 Alignment length(with gaps) = 21  
Alignment score = 0.706349  
GCF\_000612805.1\_FF3\_genomic.fna\_6:10-112 Satlength=103 Nr of Repeats=5  
RepeatLength=20 seed=CGCAGATAAC Num.seqs=3 Similarity=0.911111  
0 CGCAGATAACTCAAGAAATC-  
GCF\_000612805.1\_FF3\_genomic.fna\_1:1030894-1030997 Satlength=104 Nr of  
Repeats=5 RepeatLength=21 seed=CGCAGATAAC Num.seqs=3 Similarity=0.787879  
0 CGCAGATAANTCATGAAAAAG

\*\*\*\*\* \*\*\* \*\*\*\*

Consensus:

CGCAGATAAcTCAaGAAAaag

>Bacillus\_Fam\_702\_21\_2 Nr. of seq. 2 Alignment length(with gaps) = 21  
Alignment score = 0.603175  
GCF\_000813125.1\_ASM81312v1\_genomic.fna\_118:60365-60738 Satlength=374 Nr  
of Repeats=7 RepeatLength=21 seed=TTTACGGTTG Num.seqs=5  
Similarity=0.585507  
0 TTTACGGTTGNACAACTTT-A  
Rev.of\_GCF\_001591425.1\_ASM159142v1\_genomic.fna\_85:16-117 Satlength=102 Nr  
of Repeats=5 RepeatLength=20 seed=CGCAAATAAA Num.seqs=4

Similarity=0.656085  
TTTGCGGTAGCACGATTTTNA

6

\*\*\* \*\*\*\*\*  
Consensus:

TTTaCGGTaGcACaAcTTTnA

>Bacillus\_Fam\_703\_21\_2 Nr. of seq. 2 Alignment length(with gaps) = 21  
Alignment score = 0.682540  
GCF\_000986785.1\_ASM98678v1\_genomic.fna\_6:41878-42012 Satlength=135 Nr of  
Repeats=5 RepeatLength=21 seed=TTTGTCGTAA Num.seqs=3 Similarity=0.448718  
0 TTTGTCGTAAAG-GCAGCNAGT  
GCF\_000986785.1\_ASM98678v1\_genomic.fna\_11:136737-137027 Satlength=291 Nr  
of Repeats=9 RepeatLength=21 seed=TTTGTCGTAA Num.seqs=7  
Similarity=0.665224  
0 TTTGTCGTAAAGTGCTGTTANT

\*\*\*\*\*  
Consensus:

TTTGTCGTAAAGtGCaGctAgT

>Bacillus\_Fam\_704\_21\_2 Nr. of seq. 2 Alignment length(with gaps) = 21  
Alignment score = 0.650794  
GCF\_001591445.1\_ASM159144v1\_genomic.fna\_32:26340-26445 Satlength=106 Nr  
of Repeats=5 RepeatLength=21 seed=TTGGCGGAAT Num.seqs=5  
Similarity=0.429333  
0 TTGGCGGAATNACA-TCAAGN  
Rev.of\_GCF\_000508325.1\_BAVI\_1\_genomic.fna\_81:19982-20417 Satlength=436 Nr  
of Repeats=17 RepeatLength=21 seed=ATTCGCCAA Num.seqs=12  
Similarity=0.524772 10  
TTGGCGANATTACNGTCAAGN

\*\*\*\*\*  
Consensus:

TTGGCGaAATtACagTCAAGN

>Bacillus\_Fam\_705\_21\_2 Nr. of seq. 2 Alignment length(with gaps) = 21  
Alignment score = 0.666667  
GCF\_001636345.1\_ASM163634v1\_genomic.fna\_1:492235-492415 Satlength=181 Nr  
of Repeats=9 RepeatLength=20 seed=ACGGCGAAAA Num.seqs=9  
Similarity=0.713404  
0 AC-GGCGAAAAAACNTAATA  
GCF\_000508325.1\_BAVI\_1\_genomic.fna\_89:32-156 Satlength=125 Nr of  
Repeats=5 RepeatLength=21 seed=ACTGGCGAGA Num.seqs=4 Similarity=0.538889  
0 ACTGGCGAGAAAAAGCTAATT

\*\* \*\*\*\*\*  
Consensus:

ACtGGCGAaAAAAAccTAATa

>Bacillus\_Fam\_706\_21\_2 Nr. of seq. 2 Alignment length(with gaps) = 21  
Alignment score = 0.706349  
GCF\_001712755.1\_ASM171275v1\_genomic.fna\_37:245546-245745 Satlength=200 Nr  
of Repeats=10 RepeatLength=20 seed=GCAAATAAAA Num.seqs=9  
Similarity=0.735185 0  
GCAAATAAAAACTGGNAATA-  
Rev.of\_GCF\_001712755.1\_ASM171275v1\_genomic.fna\_33:175176-175416  
Satlength=241 Nr of Repeats=12 RepeatLength=20 seed=TTTTTATTTG  
Num.seqs=12 Similarity=0.736412  
11 GCAAATAAAAAATGTGTATAC

\*\*\*\*\* \*\* \*\*\*

Consensus:

GCAAATAAAAAaTGggaATAc

>Bacillus\_Fam\_707\_21\_2 Nr. of seq. 2 Alignment length(with gaps) = 21  
Alignment score = 0.666667  
GCF\_001877785.1\_PlanoSAMM\_genomic.fna\_106:238188-238447 Satlength=260 Nr  
of Repeats=5 RepeatLength=20 seed=TTATCAACAA Num.seqs=3  
Similarity=0.733333  
0 TTATCAACA-ATTTTTAGGAT  
GCF\_000759675.1\_ASM75967v1\_genomic.fna\_13:38889-38973 Satlength=85 Nr of  
Repeats=4 RepeatLength=21 seed=TATCTACACA Num.seqs=4 Similarity=0.498843  
1 TTATCTACACACTTTTAGANT

\*\*\*\*\* \*\*\* \* \*\*\*\*\* \*

Consensus:

TTATCaACAcAcTTTTAGaaT

>Bacillus\_Fam\_708\_21\_2 Nr. of seq. 2 Alignment length(with gaps) = 21  
Alignment score = 0.666667  
GCF\_002019645.1\_ASM201964v1\_genomic.fna\_1:280014-280475 Satlength=462 Nr  
of Repeats=18 RepeatLength=21 seed=AAAATACGGC Num.seqs=12  
Similarity=0.580369 0  
AAAATACGGCGGNTTTGA-CA  
GCF\_002019645.1\_ASM201964v1\_genomic.fna\_1:5314586-5314815 Satlength=230  
Nr of Repeats=5 RepeatLength=21 seed=AATACGGCGG Num.seqs=3  
Similarity=0.873016 2  
CGAATACGGCGGGTTTGAGCC

\*\*\*\*\* \*\*\*\*\* \*

Consensus:

aaAATACGGCGGgTTTGAgCa

>Bacillus\_Fam\_709\_21\_2 Nr. of seq. 2 Alignment length(with gaps) = 21  
Alignment score = 0.619048  
GCF\_900111815.1\_PRJEB17078\_genomic.fna\_1:2579479-2579833 Satlength=355 Nr  
of Repeats=10 RepeatLength=21 seed=TTGGTTGATT Num.seqs=8  
Similarity=0.642081 0  
TTGGTTGATT-CTAGAGAAG



GCF\_900111815.1\_PRJEB17078\_genomic.fna\_1:2923151-2924173 Satlength=1023  
Nr of Repeats=29 RepeatLength=21 seed=TTGGTTGATTT Num.seqs=19  
Similarity=0.555217 1  
TTGGTTGATTTCTGCTGNAN

\*\*\*\*\* \*\* \* \*

Consensus:

TTGGTTGATTTcCTacaGaAg

>Bacillus\_Fam\_710\_21\_2 Nr. of seq. 2 Alignment length(with gaps) = 21  
Alignment score = 0.690476  
GCF\_900156865.1\_PRJEB18960\_genomic.fna\_3:4206861-4206941 Satlength=81 Nr  
of Repeats=4 RepeatLength=20 seed=GACAGTATTT Num.seqs=4  
Similarity=0.666667  
0 GACAGTATTTCCAAAATAGC-  
Rev.of\_GCF\_000712595.1\_ASM71259v1\_genomic.fna\_14:34518-34623  
Satlength=106 Nr of Repeats=5 RepeatLength=21 seed=TCGGCTATTT Num.seqs=5  
Similarity=0.665152 2  
GAAAGTGTATCGAAAATAGCC

\*\* \*\*\* \* \*\* \*\*\*\*\*

Consensus:

GAaAGTaTaTcC AAAATAGCc

>Bacillus\_Fam\_711\_21\_2 Nr. of seq. 2 Alignment length(with gaps) = 21  
Alignment score = 0.809524  
GCF\_000169195.2\_ASM16919v2\_genomic.fna\_1:1723063-1723231 Satlength=169 Nr  
of Repeats=6 RepeatLength=21 seed=GCAACATCCT Num.seqs=4  
Similarity=0.714286 0  
GCAACATCCTGTTTCAGCACT  
Rev.of\_GCF\_000832905.1\_ASM83290v1\_genomic.fna\_1:1842445-1842529  
Satlength=85 Nr of Repeats=4 RepeatLength=21 seed=GATGTTGCAG Num.seqs=4  
Similarity=0.873016 8  
GCAACATCTTGTTTTAGCCCT

\*\*\*\*\* \*\*\*\*\* \*\* \*

Consensus:

GCAACATCcTGTTTcAGCaT

>Bacillus\_Fam\_712\_21\_2 Nr. of seq. 2 Alignment length(with gaps) = 21  
Alignment score = 0.873016  
GCF\_000175075.1\_ASM17507v1\_genomic.fna\_34:92519-92645 Satlength=127 Nr of  
Repeats=4 RepeatLength=21 seed=TGTTAGTACA Num.seqs=3 Similarity=0.830688  
0 TGTTAGTACATTAAAGAGTGA  
Rev.of\_GCF\_001648575.1\_ASM164857v1\_genomic.fna\_48:38804-38909  
Satlength=106 Nr of Repeats=5 RepeatLength=21 seed=ACTAACATCA Num.seqs=5  
Similarity=0.826087 7  
TGTTAGTGTATTAAAGAGTGA

\*\*\*\*\* \*\*\*\*\*

Consensus:

TGTTAGTAcATTAAAGAGTGA

>Bacillus\_Fam\_713\_21\_2 Nr. of seq. 2 Alignment length(with gaps) = 21  
Alignment score = 0.746032  
GCF\_000175075.1\_ASM17507v1\_genomic.fna\_36:48707-48854 Satlength=148 Nr of  
Repeats=7 RepeatLength=21 seed=GGAGGCTCTT Num.seqs=7 Similarity=0.830688  
0 GGAGGCTCTTCGCCATCACCC  
Rev.of\_GCF\_001889165.1\_ASM188916v1\_genomic.fna\_1:146949-147096  
Satlength=148 Nr of Repeats=7 RepeatLength=21 seed=GGAGAAGAAA Num.seqs=7  
Similarity=0.927438 14  
GGTGTTTCTTCTCCATCACCC

\*\* \* \*\*\*\*\*

Consensus:

GGaGgcTCTTCgCCATCACCC

>Bacillus\_Fam\_714\_21\_2 Nr. of seq. 2 Alignment length(with gaps) = 21  
Alignment score = 0.746032  
GCF\_000307875.1\_BABA1.0\_genomic.fna\_138:19368-19452 Satlength=85 Nr of  
Repeats=4 RepeatLength=21 seed=ATCCGACAGT Num.seqs=4 Similarity=0.723485  
20 TCCGACAGTTAGCTGCGGTTA  
Rev.of\_GCF\_001591665.1\_ASM159166v1\_genomic.fna\_22:13463-13608  
Satlength=146 Nr of Repeats=7 RepeatLength=21 seed=ACTGTCGGAT Num.seqs=5  
Similarity=0.675758 30  
TCCGACAGTAAGCCGCTGCTA

\*\*\*\*\* \*\*\* \*\* \* \*

Consensus:

ATCCGACAGTaAGCcGCgGcT

>Bacillus\_Fam\_715\_21\_2 Nr. of seq. 2 Alignment length(with gaps) = 21  
Alignment score = 0.809524  
GCF\_000508325.1\_BAVI\_1\_genomic.fna\_59:240543-240669 Satlength=127 Nr of  
Repeats=5 RepeatLength=21 seed=TTCAAAATTT Num.seqs=4 Similarity=0.820106  
0 TTCAAAATTTCACTGTGATCG  
Rev.of\_GCF\_000724485.1\_ASM72448v1\_genomic.fna\_1:3059785-3059911  
Satlength=127 Nr of Repeats=5 RepeatLength=21 seed=TTTGAAAGAA Num.seqs=4  
Similarity=0.693122 6  
TTCAAAAGTTTCACTGTGTTCT

\*\*\*\*\* \*\*\*\*\* \*\*

Consensus:

TTCAAAaTTTCACTGTGaTCg

>Bacillus\_Fam\_716\_21\_2 Nr. of seq. 2 Alignment length(with gaps) = 21  
Alignment score = 0.650794  
GCF\_000612625.1\_JCE\_genomic.fna\_78:17147-17414 Satlength=268 Nr of  
Repeats=5 RepeatLength=21 seed=TTTATCAACC Num.seqs=3 Similarity=0.666667  
0 TTTATCAACCACTTTTCCTCN

GCF\_002019635.1\_ASM201963v1\_genomic.fna\_1:406736-407553 Satlength=818 Nr  
of Repeats=28 RepeatLength=21 seed=TTCAACCACT Num.seqs=21  
Similarity=0.616011 3  
TNTTCAACCACTTCTCTGCT

\* \* \*\*\*\*\* \* \*

Consensus:

TtTaTCAACCACTTcTCcgCt

>Bacillus\_Fam\_717\_21\_2 Nr. of seq. 2 Alignment length(with gaps) = 21  
Alignment score = 0.873016

GCF\_000708755.2\_ASM70875v2\_genomic.fna\_7:112578-112785 Satlength=208 Nr  
of Repeats=7 RepeatLength=21 seed=TTACTACCAA Num.seqs=5  
Similarity=0.714286

0 TTACTACCAACTACCGCAGAT

GCF\_000709935.2\_ASM70993v2\_genomic.fna\_19:119838-120024 Satlength=187 Nr  
of Repeats=6 RepeatLength=21 seed=TTACTACCAA Num.seqs=4  
Similarity=0.671958

0 TTACTACCAACAACCACAGAT

\*\*\*\*\* \*\*\* \*\*\*\*\*

Consensus:

TTACTACCAACaACCaCAGAT

>Bacillus\_Fam\_718\_21\_2 Nr. of seq. 2 Alignment length(with gaps) = 21  
Alignment score = 0.682540

GCF\_000712595.1\_ASM71259v1\_genomic.fna\_21:13433-13580 Satlength=148 Nr of  
Repeats=7 RepeatLength=21 seed=ATAGCCGATA Num.seqs=7 Similarity=0.860922

0 ATAGCCGATACACCCGTGAAA

Rev.of\_GCF\_000752035.1\_Bacillus\_rubiinfantis\_genomic.fna\_12:4665-5905  
Satlength=1241 Nr of Repeats=58 RepeatLength=21 seed=TTACGGGAGT

Num.seqs=45 Similarity=0.766697 19

AGCGCGGATACTCCCGTAAAA

\* \*\* \*\*\*\*\* \*\*\*\*\* \*\*\*

Consensus:

AgaGCcGATACaCCCGTaAAA

>Bacillus\_Fam\_719\_21\_2 Nr. of seq. 2 Alignment length(with gaps) = 21  
Alignment score = 0.698413

GCF\_000813125.1\_ASM81312v1\_genomic.fna\_142:26887-26971 Satlength=85 Nr of  
Repeats=4 RepeatLength=21 seed=AATCACTACG Num.seqs=4 Similarity=0.556713

0 AATCACTACGGAATTCAAANT

Rev.of\_GCF\_000813125.1\_ASM81312v1\_genomic.fna\_142:36627-36711

Satlength=85 Nr of Repeats=4 RepeatLength=21 seed=TCGTAGTGAT Num.seqs=4  
Similarity=0.612374 11

AATCACTACGAAAATTAGAAT

\*\*\*\*\* \*\* \* \* \* \*

Consensus:

AATCACTACGaAAATcAaAaT

>Bacillus\_Fam\_720\_21\_2 Nr. of seq. 2 Alignment length(with gaps) = 21  
Alignment score = 0.746032  
GCF\_000948175.1\_BFA\_2\_A\_genomic.fna\_157:32173-32278 Satlength=106 Nr of  
Repeats=5 RepeatLength=21 seed=GTATTCGACA Num.seqs=5 Similarity=0.974603  
0 GTATTCGACACACTTTGGATT  
GCF\_000948175.1\_BFA\_2\_A\_genomic.fna\_161:7622-7844 Satlength=223 Nr of  
Repeats=4 RepeatLength=21 seed=GGATCGTATT Num.seqs=3 Similarity=1.000000  
16 GTATTCGACAGAAGTTGGATC

\*\*\*\*\* \* \*\*\*\*\*

Consensus:

GTATTCGACAcAagTTGGATc

>Bacillus\_Fam\_721\_21\_2 Nr. of seq. 2 Alignment length(with gaps) = 21  
Alignment score = 0.888889  
GCF\_001273755.1\_ASM127375v1\_genomic.fna\_17:235079-235207 Satlength=129 Nr  
of Repeats=6 RepeatLength=21 seed=TTACGAGTA Num.seqs=5  
Similarity=0.710145 30  
TCNTGAAAATTCACGAGTAAA  
Rev.of\_GCF\_001273755.1\_ASM127375v1\_genomic.fna\_17:3961735-3962511  
Satlength=777 Nr of Repeats=38 RepeatLength=21 seed=TTACTCGTGA  
Num.seqs=27 Similarity=0.823814  
41 TCGTGAAAACCTCACGAGTAAA

\*\*\*\*\* \*\*\*\*\*

Consensus:

cTCACGAGTAAATCgTGAAAA

>Bacillus\_Fam\_722\_21\_2 Nr. of seq. 2 Alignment length(with gaps) = 21  
Alignment score = 0.682540  
GCF\_001315065.1\_ASM131506v1\_genomic.fna\_30:7615-7720 Satlength=106 Nr of  
Repeats=5 RepeatLength=21 seed=GCCTTCATCT Num.seqs=5 Similarity=1.000000  
0 GCCTTCATCTCCGTCCTCCAGG  
GCF\_002019635.1\_ASM201963v1\_genomic.fna\_1:1180363-1180615 Satlength=253  
Nr of Repeats=11 RepeatLength=21 seed=CTGGATCTTG Num.seqs=10  
Similarity=0.880071 17  
ATCTTGATCTCCGTCACCTGG

\*\*\* \*\*\*\*\* \*\* \*\*

Consensus:

acCTTcATCTCCGTCaCCaGG

>Bacillus\_Fam\_723\_21\_2 Nr. of seq. 2 Alignment length(with gaps) = 21  
Alignment score = 0.698413  
GCF\_001315165.1\_ASM131516v1\_genomic.fna\_27:15017-15121 Satlength=105 Nr  
of Repeats=4 RepeatLength=21 seed=GTGGTCGATA Num.seqs=3  
Similarity=0.767196  
0 GTGGTCGATATAATCANAAAA

GCF\_002019645.1\_ASM201964v1\_genomic.fna\_1:659769-659933 Satlength=165 Nr  
of Repeats=8 RepeatLength=21 seed=CAATAAAACC Num.seqs=6  
Similarity=0.817989  
5 TTGGTCAATAAAACCAGAAAA

\*\*\*\*\* \*\*\* \*\* \*\* \*\*\*\*\*

Consensus:

gTGGTCaATAaAAcCAgAAAA

>Bacillus\_Fam\_724\_21\_2 Nr. of seq. 2 Alignment length(with gaps) = 21  
Alignment score = 0.619048

GCF\_001591425.1\_ASM159142v1\_genomic.fna\_40:10164-10290 Satlength=127 Nr  
of Repeats=6 RepeatLength=21 seed=TGTTAAATAA Num.seqs=6  
Similarity=0.654589

0 TGTTAAATAAAATCTCAAAGT

GCF\_001591425.1\_ASM159142v1\_genomic.fna\_132:2162-2350 Satlength=189 Nr of  
Repeats=8 RepeatLength=21 seed=CTGTAAAGTA Num.seqs=6 Similarity=0.712169  
20 TGTTAAGAAAAACCACAAACC

\*\*\*\*\* \*\*\*\*\* \* \*\*\*\*\*

Consensus:

TGTTAAaaAAAAcCaCAAacc

>Bacillus\_Fam\_725\_21\_2 Nr. of seq. 2 Alignment length(with gaps) = 21  
Alignment score = 0.825397

GCF\_001591445.1\_ASM159144v1\_genomic.fna\_9:109889-109973 Satlength=85 Nr  
of Repeats=4 RepeatLength=21 seed=CGCCAATAGA Num.seqs=4  
Similarity=0.815657

0 CGCCAATAGAACCTCTGAATC

GCF\_001591445.1\_ASM159144v1\_genomic.fna\_9:169675-169822 Satlength=148 Nr  
of Repeats=7 RepeatLength=21 seed=CGCCAATAGA Num.seqs=7  
Similarity=0.779289

0 CGCCAATAGAACCTGNAAATC

\*\*\*\*\* \*\*\*\*\*

Consensus:

CGCCAATAGAACCTctaATC

>Bacillus\_Fam\_726\_21\_2 Nr. of seq. 2 Alignment length(with gaps) = 21  
Alignment score = 0.619048

GCF\_001591665.1\_ASM159166v1\_genomic.fna\_82:10-115 Satlength=106 Nr of  
Repeats=5 RepeatLength=21 seed=ATCCGACAGT Num.seqs=5 Similarity=0.898413  
0 ATCCGACAGTTGGAACACGCT

Rev.of\_GCF\_001591805.1\_ASM159180v1\_genomic.fna\_15:119662-119746

Satlength=85 Nr of Repeats=4 RepeatLength=21 seed=GCCAACTGTC Num.seqs=4  
Similarity=0.904762

TTGCGACAGTTGGCTCTTGCT

14

\* \*\*\*\*\* \* \*\*\*

Consensus:

aTcCGACAGTTGGaaCacGCT

>Bacillus\_Fam\_727\_21\_2 Nr. of seq. 2 Alignment length(with gaps) = 21  
Alignment score = 0.682540  
GCF\_001591805.1\_ASM159180v1\_genomic.fna\_15:30953-31058 Satlength=106 Nr  
of Repeats=5 RepeatLength=21 seed=TTGGCGAAAT Num.seqs=5  
Similarity=0.587879

0 TTGGCGAAATNCNNNCACAGT

GCF\_001591805.1\_ASM159180v1\_genomic.fna\_15:39100-39247 Satlength=148 Nr  
of Repeats=7 RepeatLength=21 seed=AGTTTGGCGA Num.seqs=7  
Similarity=0.818594

18 TTGGCGAAATCCNGCGTAGT

\*\*\*\*\* \* \* \* \*\*\*

Consensus:

TTGGCGAAATcCcNgCacAGT

>Bacillus\_Fam\_728\_20\_2 Nr. of seq. 2 Alignment length(with gaps) = 20  
Alignment score = 0.800000  
GCF\_000175075.1\_ASM17507v1\_genomic.fna\_29:50387-50489 Satlength=103 Nr of  
Repeats=5 RepeatLength=20 seed=TATCCATTGT Num.seqs=3 Similarity=0.777778

0 TATCCATTGTAAATTTGATA

GCF\_001648575.1\_ASM164857v1\_genomic.fna\_66:142753-142855 Satlength=103 Nr  
of Repeats=5 RepeatLength=20 seed=TATCCATTGT Num.seqs=3  
Similarity=0.777778

0

TATCCATTGTTAATTGAATA

\*\*\*\*\* \*\*\*\* \*\*\*

Consensus:

TATCCATTGTaAATTgaATA

>Bacillus\_Fam\_729\_20\_2 Nr. of seq. 2 Alignment length(with gaps) = 20  
Alignment score = 0.616667  
GCF\_000181495.1\_ASM18149v1\_genomic.fna\_133:12224-12305 Satlength=82 Nr of  
Repeats=4 RepeatLength=20 seed=GACGCAATTA Num.seqs=3 Similarity=0.544974

0 GACGCAATTATTTTCATATTA

Rev.of\_GCF\_000181495.1\_ASM18149v1\_genomic.fna\_147:20393-20494  
Satlength=102 Nr of Repeats=5 RepeatLength=20 seed=TAATTGCGTC Num.seqs=4  
Similarity=0.498843

10

GACGCAATTAAACTGNATTA

\*\*\*\*\* \*\*\*\*

Consensus:

GACGCAATTAAaccatATTA

>Bacillus\_Fam\_730\_20\_2 Nr. of seq. 2 Alignment length(with gaps) = 20  
Alignment score = 0.700000  
GCF\_000285535.1\_ASM28553v1\_genomic.fna\_2:785830-786454 Satlength=625 Nr  
of Repeats=30 RepeatLength=20 seed=TTTGGCTCTC Num.seqs=25

```

Similarity=0.766222
TTTGCGTCTCCTCCNGATA
GCF_000285535.1_ASM28553v1_genomic.fna_62:31-473 Satlength=443 Nr of
Repeats=22 RepeatLength=20 seed=ATTTGCGTCT Num.seqs=21
Similarity=0.616594
19      TTTGCGTCTCCAGNTGATA

*****      ****
Consensus:

TTTGCGTCTCCcacctGATA

>Bacillus_Fam_731_20_2 Nr. of seq. 2 Alignment length(with gaps) = 20
Alignment score = 0.750000
GCF_000311725.1_ASM31172v1_genomic.fna_2:224797-224897 Satlength=101 Nr
of Repeats=5 RepeatLength=20 seed=TATATCGGCG Num.seqs=5
Similarity=0.593651
14      GGCGNTTTTAGCAATATATC
GCF_000311725.1_ASM31172v1_genomic.fna_4:95730-95830 Satlength=101 Nr of
Repeats=5 RepeatLength=20 seed=TATATCGGCG Num.seqs=3 Similarity=0.671958
14      GGCGTTTTTTGAGATATATC

*****      **** *  *
Consensus:

TATATCGGCGtTTTTaGaaA

>Bacillus_Fam_732_20_2 Nr. of seq. 2 Alignment length(with gaps) = 20
Alignment score = 0.883333
GCF_000380245.2_ASM38024v2_genomic.fna_9:119172-119272 Satlength=101 Nr
of Repeats=5 RepeatLength=20 seed=CTCATATATT Num.seqs=5
Similarity=0.893333
0      CTCATATATTTGTTCTCNG
GCF_000380245.2_ASM38024v2_genomic.fna_9:119172-119412 Satlength=241 Nr
of Repeats=12 RepeatLength=20 seed=CTCATATATT Num.seqs=12
Similarity=0.859596
CTCATATATTTCGTTCTCCG

*****      ***** *
Consensus:

CTCATATATTTcGTTCTCcG

>Bacillus_Fam_733_20_2 Nr. of seq. 2 Alignment length(with gaps) = 20
Alignment score = 0.750000
GCF_001591585.1_ASM159158v1_genomic.fna_8:146075-146177 Satlength=103 Nr
of Repeats=5 RepeatLength=20 seed=TTTGGCTGAT Num.seqs=3
Similarity=0.575758
0      TTTGGCTGATATTTTCTNC
Rev.of_GCF_001591585.1_ASM159158v1_genomic.fna_18:3-309 Satlength=307 Nr
of Repeats=15 RepeatLength=20 seed=ATCAGCCAAA Num.seqs=9
Similarity=0.798942
TTTGGCTGATATTTTCCCAG

```

0

0

10

\*\*\*\*\* \*

Consensus:

TTTGGCTGATATTTTcCcac

>Bacillus\_Fam\_734\_19\_2 Nr. of seq. 2 Alignment length(with gaps) = 19  
Alignment score = 0.649123  
BACILLUS\_PSEUDALCALIPHILUS\_genomic.fna\_3:387353-387569 Satlength=217 Nr of  
Repeats=10 RepeatLength=18 seed=CCCGGATGAG Num.seqs=9  
Similarity=0.872428 0  
CCCGGATG-AGGTCCTGGT  
Rev.of\_GCF\_001636325.1\_ASM163632v1\_genomic.fna\_2:690747-691053  
Satlength=307 Nr of Repeats=17 RepeatLength=18 seed=CCAGCACCAG  
Num.seqs=17 Similarity=0.827887  
5 GCTGG-TGAAGGTCCTGGT

\* \*\* \* \*\*\*\*\*

Consensus:

cCcGGaTGaAGGTCCTGGT

>Bacillus\_Fam\_735\_19\_2 Nr. of seq. 2 Alignment length(with gaps) = 19  
Alignment score = 0.622807  
GCF\_000008505.1\_ASM850v1\_genomic.fna\_1:4938976-4939084 Satlength=109 Nr  
of Repeats=6 RepeatLength=18 seed=CTGGACAAGC Num.seqs=6  
Similarity=0.911111  
0 CTGGACAAGCAAG-ACAAT  
GCF\_000430785.1\_ASM43078v1\_genomic.fna\_13:56722-56902 Satlength=181 Nr of  
Repeats=8 RepeatLength=18 seed=TTAGAGAAAGT Num.seqs=6 Similarity=0.782716  
17 -TAGAGAAGCAAGAACACT

\* \*\* \*\*\*\*\* \*\*\* \*

Consensus:

cTaGAcAAGCAAGaACAaT

>Bacillus\_Fam\_736\_19\_2 Nr. of seq. 2 Alignment length(with gaps) = 19  
Alignment score = 0.649123  
GCF\_000177235.2\_ASM17723v2\_genomic.fna\_1:380562-380634 Satlength=73 Nr of  
Repeats=4 RepeatLength=18 seed=AAGCCAATGC Num.seqs=4 Similarity=0.962963  
0 AAGCCAATGCTGCC-CACA  
Rev.of\_GCF\_000242895.2\_ASM24289v3\_genomic.fna\_1:1111116-1111242  
Satlength=127 Nr of Repeats=7 RepeatLength=18 seed=GCGGCTTTGG Num.seqs=7  
Similarity=0.978836 12 AA-  
CCAAAGCCGCCACACA

\*\* \*\*\*\* \* \*\* \*

Consensus:

AAgCCAAaGCcGCCaCACA

>Bacillus\_Fam\_737\_18\_2 Nr. of seq. 2 Alignment length(with gaps) = 18  
Alignment score = 0.666667



GCF\_000007825.1\_ASM782v1\_genomic.fna\_1:4701846-4702305 Satlength=460 Nr  
of Repeats=12 RepeatLength=18 seed=ACGGGGAACA Num.seqs=10  
Similarity=0.925926

0

ACGGGGAACACCGGACCC

GCF\_000769555.1\_ASM76955v1\_genomic.fna\_1:742609-742825 Satlength=217 Nr  
of Repeats=8 RepeatLength=18 seed=ACCGGAGCAA Num.seqs=5  
Similarity=0.770370

9 ACGGGGNTNACCGGAGCA

\*\*\*\*\* \* \* \*

Consensus:

ACGGGGaacACCGGAcCa

>Bacillus\_Fam\_738\_18\_2 Nr. of seq. 2 Alignment length(with gaps) = 18  
Alignment score = 0.629630

GCF\_000008505.1\_ASM850v1\_genomic.fna\_1:1992091-1992343 Satlength=253 Nr  
of Repeats=14 RepeatLength=18 seed=CCTGATACAG Num.seqs=14  
Similarity=0.888482

0

CCTGATACAGGAGAAAAA

Rev.of\_GCF\_000161455.1\_ASM16145v1\_genomic.fna\_1:1437244-1437370  
Satlength=127 Nr of Repeats=7 RepeatLength=18 seed=TATCTGGTTT Num.seqs=5  
Similarity=0.955556

7

CCAGATACACCAAATAAA

\*\* \* \* \* \*

Consensus:

CCaGATACAccAaAaAAA

>Bacillus\_Fam\_739\_18\_2 Nr. of seq. 2 Alignment length(with gaps) = 18  
Alignment score = 0.629630

GCF\_000161455.1\_ASM16145v1\_genomic.fna\_1:4033827-4033917 Satlength=91 Nr  
of Repeats=5 RepeatLength=18 seed=TGTTGATGCT Num.seqs=5  
Similarity=0.970370

0 TGTTGATGCTGACCATGG

Rev.of\_GCF\_000832605.1\_ASM83260v1\_genomic.fna\_1:1245276-1245432  
Satlength=157 Nr of Repeats=6 RepeatLength=18 seed=CATCACCAAG Num.seqs=5  
Similarity=0.874074

5

TGATGGTGTTGGCCTTGG

\*\* \* \* \* \*

Consensus:

TGaTGaTGcTGaCCaTGG

>Bacillus\_Fam\_740\_18\_2 Nr. of seq. 2 Alignment length(with gaps) = 18  
Alignment score = 0.648148

GCF\_000175075.1\_ASM17507v1\_genomic.fna\_32:87599-88088 Satlength=490 Nr of  
Repeats=18 RepeatLength=18 seed=AACAACAGCA Num.seqs=17  
Similarity=0.869281

0 AACAACAGCAACAGCGGN

GCF\_900104555.1\_IMG-

taxon\_2651870172\_annotated\_assembly\_genomic.fna\_17:3091-3181 Satlength=91

Nr of Repeats=5 RepeatLength=18 seed=ACAACAACAC Num.seqs=5  
Similarity=0.940741 1 CACAACAACACCAGCAGT

\*\*\*\*\* \*\* \*\*\*\* \*

Consensus:

aACAACAaCAaCAGCaGt

>Bacillus\_Fam\_741\_18\_2 Nr. of seq. 2 Alignment length(with gaps) = 18  
Alignment score = 0.925926  
GCF\_000177235.2\_ASM17723v2\_genomic.fna\_1:532212-532500 Satlength=289 Nr  
of Repeats=16 RepeatLength=18 seed=CCAGGCGAAG Num.seqs=16  
Similarity=0.934568 0  
CCAGGCGAAGGTGAAGGC  
GCF\_001315065.1\_ASM131506v1\_genomic.fna\_40:23388-23478 Satlength=91 Nr of  
Repeats=5 RepeatLength=18 seed=AGAAGGTGAA Num.seqs=5 Similarity=0.970370  
5 CCAGGAGAAGGTGAAGGC

\*\*\*\*\* \*\*\*\*\*

Consensus:

CCAGGaGAAGGTGAAGGC

>Bacillus\_Fam\_742\_18\_2 Nr. of seq. 2 Alignment length(with gaps) = 18  
Alignment score = 0.629630  
GCF\_000299035.1\_ASM29903v1\_genomic.fna\_3:476185-476329 Satlength=145 Nr  
of Repeats=8 RepeatLength=18 seed=ATCTTGGTCT Num.seqs=8  
Similarity=0.960317  
0 ATCTTGGTCTTTTCCTGG  
Rev.of\_GCF\_001315065.1\_ASM131506v1\_genomic.fna\_13:100988-101102  
Satlength=115 Nr of Repeats=4 RepeatLength=18 seed=AGATGAAGAG Num.seqs=3  
Similarity=1.000000 10  
CTCTTCATCTAGTCCTGG

\*\*\*\* \*\* \*\*\*\*\*

Consensus:

aTCTTcaTCTagTCCTGG

>Bacillus\_Fam\_743\_18\_2 Nr. of seq. 2 Alignment length(with gaps) = 18  
Alignment score = 0.629630  
GCF\_000299035.1\_ASM29903v1\_genomic.fna\_4:44054-44162 Satlength=109 Nr of  
Repeats=4 RepeatLength=18 seed=CACCTAATCC Num.seqs=3 Similarity=1.000000  
0 CACCTAATCCAACCTCCGC  
Rev.of\_GCF\_001439915.1\_ASM143991v1\_genomic.fna\_85:15375-16048  
Satlength=674 Nr of Repeats=4 RepeatLength=18 seed=GTGGATTTGG Num.seqs=3  
Similarity=0.802469 12  
CACCCAATCCACCTAATC

\*\*\*\* \*\*\*\*\* \*\* \*

Consensus:

CACCCaATCCaACTaagC

>Bacillus\_Fam\_744\_18\_2 Nr. of seq. 2 Alignment length(with gaps) = 18  
Alignment score = 0.703704  
GCF\_000305495.1\_BacPsy2.0\_genomic.fna\_210:5429-5585 Satlength=157 Nr of  
Repeats=8 RepeatLength=18 seed=GCTTCTTGTT Num.seqs=6 Similarity=0.866667  
0 GCCTCTTGTTTCAGCTTCT  
GCF\_000972245.2\_ASM97224v2\_genomic.fna\_1:252282-252630 Satlength=349 Nr  
of Repeats=18 RepeatLength=18 seed=TGAGCTTGAG Num.seqs=17  
Similarity=0.881264  
GCCTCTTGCTGAGCTTGA

9

\*\*\*\*\* \* \*\*\*\*\*

Consensus:

GCCTCTTGcTcAGCTTca

>Bacillus\_Fam\_745\_18\_2 Nr. of seq. 2 Alignment length(with gaps) = 18  
Alignment score = 0.777778  
GCF\_000430785.1\_ASM43078v1\_genomic.fna\_5:20934-21024 Satlength=91 Nr of  
Repeats=5 RepeatLength=18 seed=ATTAGTACCA Num.seqs=5 Similarity=0.881481  
0 ATTAGTACCAGTGCCTGG  
GCF\_000934845.1\_ASM93484v1\_genomic.fna\_135:23551-23617 Satlength=67 Nr of  
Repeats=4 RepeatLength=18 seed=GGATCAGTAC Num.seqs=3 Similarity=0.901235  
16 ATCAGTACCAGTACCAGG

\*\* \*\*\*\*\* \*\* \*\*

Consensus:

ATcAGTACCAGTaCCaGG

>Bacillus\_Fam\_746\_18\_2 Nr. of seq. 2 Alignment length(with gaps) = 18  
Alignment score = 0.629630  
GCF\_000430785.1\_ASM43078v1\_genomic.fna\_24:4949-5111 Satlength=163 Nr of  
Repeats=8 RepeatLength=18 seed=AGAACTTTTA Num.seqs=7 Similarity=0.957672  
0 AGAACTTTTAGAAGCCGT  
Rev.of\_GCF\_001591445.1\_ASM159144v1\_genomic.fna\_30:53287-53467  
Satlength=181 Nr of Repeats=10 RepeatLength=18 seed=TTCTAGAAGT  
Num.seqs=10 Similarity=0.917695  
13 AATACTTCTAGAAACCGG

\* \*\*\*\* \*\*\*\*\* \*\*\*

Consensus:

AaaACTTcTAGAAaCCGg

>Bacillus\_Fam\_747\_18\_2 Nr. of seq. 2 Alignment length(with gaps) = 18  
Alignment score = 0.777778  
GCF\_000504145.1\_SOAPdenovo\_for\_version2.04\_of\_Bacillus\_sp.\_FJAT-  
14515\_genome\_genomic.fna\_25:69856-70072 Satlength=217 Nr of Repeats=12  
RepeatLength=18 seed=GGCCCGAATC Num.seqs=12 Similarity=0.987654 0  
GGCCCGAATCCCATGCCG  
Rev.of\_GCF\_001273755.1\_ASM127375v1\_genomic.fna\_17:794926-795034  
Satlength=109 Nr of Repeats=6 RepeatLength=18 seed=GGAATGGGAT Num.seqs=6  
Similarity=0.891358  
GGGCCGAATCCCATTTCCA

17

\*\* \*\*\*\*\* \*\*

Consensus:

GGcCCGAATCCCATgCCa

>Bacillus\_Fam\_748\_18\_2 Nr. of seq. 2 Alignment length(with gaps) = 18

Alignment score = 0.851852

GCF\_000708755.2\_ASM70875v2\_genomic.fna\_2:520937-521289 Satlength=353 Nr of Repeats=17 RepeatLength=18 seed=GGAGCACCTG Num.seqs=14

Similarity=0.822548

0

GGAGCACCTGTTACGCC

GCF\_000709935.2\_ASM70993v2\_genomic.fna\_1:1110697-1110931 Satlength=235 Nr of Repeats=13 RepeatLength=18 seed=GGAGCACCTG Num.seqs=13

Similarity=0.851852

0

GGAGCACCTGTTGCGCCT

\*\*\*\*\* \*\*\*\*

Consensus:

GGAGCACCTGTTaCGCCc

>Bacillus\_Fam\_749\_18\_2 Nr. of seq. 2 Alignment length(with gaps) = 18

Alignment score = 0.629630

GCF\_000709935.2\_ASM70993v2\_genomic.fna\_6:62-278 Satlength=217 Nr of Repeats=10 RepeatLength=18 seed=CCGGCAGGTC Num.seqs=8

Similarity=0.777778

0 CCGGCAGGTCCAGTAACT

Rev.of\_GCF\_000712615.1\_ASM71261v1\_genomic.fna\_82:4158-4356 Satlength=199

Nr of Repeats=8 RepeatLength=18 seed=CTCAAGGAAT Num.seqs=5

Similarity=0.911111

7

CCTTGAGATCCAGTAATT

\*\* \*\* \*\*\*\*\* \*

Consensus:

CCggcAGaTCCAGTAaCT

>Bacillus\_Fam\_750\_18\_2 Nr. of seq. 2 Alignment length(with gaps) = 18

Alignment score = 0.703704

GCF\_000759675.1\_ASM75967v1\_genomic.fna\_158:37496-37595 Satlength=100 Nr of Repeats=6 RepeatLength=18 seed=GGTGGTATTG Num.seqs=4

Similarity=0.802469

0 GGTGGTATTGGCGGTCCT

GCF\_001591445.1\_ASM159144v1\_genomic.fna\_87:10237-10345 Satlength=109 Nr of Repeats=6 RepeatLength=18 seed=GGACATGGTG Num.seqs=6

Similarity=0.925926

12 GGTGGAATGGGCGGACAT

\*\*\*\*\* \*\* \*\*\*\*\* \* \*

Consensus:

GGTGGaATgGGCGGaCaT

>Bacillus\_Fam\_751\_18\_2 Nr. of seq. 2 Alignment length(with gaps) = 18  
Alignment score = 0.777778  
GCF\_000813125.1\_ASM81312v1\_genomic.fna\_74:2375-2537 Satlength=163 Nr of  
Repeats=9 RepeatLength=18 seed=ATACCGGAGG Num.seqs=9 Similarity=0.962963  
0 ATACCGGAGGCGAAGGAG  
GCF\_001315165.1\_ASM131516v1\_genomic.fna\_159:2411-2519 Satlength=109 Nr of  
Repeats=6 RepeatLength=18 seed=GGTGGTGAAG Num.seqs=6 Similarity=0.841975  
5 ATACCGGTGGTGAAGAAG

\*\*\*\*\* \*\* \*\*\*\* \*\*

Consensus:

ATACCGGaGGcGAAGaAG

>Bacillus\_Fam\_752\_18\_2 Nr. of seq. 2 Alignment length(with gaps) = 18  
Alignment score = 0.629630  
GCF\_001274935.1\_ASM127493v1\_genomic.fna\_36:82635-84309 Satlength=1675 Nr  
of Repeats=91 RepeatLength=18 seed=CCTACTGGTG Num.seqs=88  
Similarity=0.883761 0  
CCTACTGGTGCTGCTGGT  
GCF\_001636425.1\_ASM163642v1\_genomic.fna\_1:2005510-2005852 Satlength=343  
Nr of Repeats=19 RepeatLength=18 seed=GTGCTTGTGG Num.seqs=16  
Similarity=0.973457 1  
CGTGCTTGTGGTGCTCGT

\* \* \*\* \*\*\* \*\*\*\*\* \*\*

Consensus:

CcTaCTgGTGcTGCTcGT

>Bacillus\_Fam\_753\_18\_2 Nr. of seq. 2 Alignment length(with gaps) = 18  
Alignment score = 0.666667  
GCF\_001420715.1\_ASM142071v1\_genomic.fna\_22:3447196-3448294 Satlength=1099  
Nr of Repeats=61 RepeatLength=18 seed=CCAGCAGGTG Num.seqs=61  
Similarity=0.861486 0  
CCAGCAGGTGCTACCGGA  
Rev.of\_GCF\_001712755.1\_ASM171275v1\_genomic.fna\_33:51006-51924  
Satlength=919 Nr of Repeats=48 RepeatLength=18 seed=CCTGTTGCTC  
Num.seqs=45 Similarity=0.793042  
17 CCAGCNGGAGCAACAGGN

\*\*\*\*\* \*\* \*\* \*\* \*\*

Consensus:

CCAGCaGGaGCaACaGGa

>Bacillus\_Fam\_754\_18\_2 Nr. of seq. 2 Alignment length(with gaps) = 18  
Alignment score = 0.703704  
GCF\_001578185.1\_ASM157818v1\_genomic.fna\_1:2941947-2942073 Satlength=127  
Nr of Repeats=7 RepeatLength=18 seed=CTGGCTTTGA Num.seqs=7  
Similarity=0.887125 0  
CTGGCTTTGATTGTTCTG  
Rev.of\_GCF\_001591445.1\_ASM159144v1\_genomic.fna\_68:19027-19129  
Satlength=103 Nr of Repeats=5 RepeatLength=18 seed=CCACAACGAC Num.seqs=4

Similarity=0.913580  
GTGGCTTTGGTCGTTGTG

1

\*\*\*\*\* \* \*\*\* \*\*  
Consensus:

cTGGCTTTGaTcGTTcTG

>Bacillus\_Fam\_755\_18\_2 Nr. of seq. 2 Alignment length(with gaps) = 18  
Alignment score = 0.648148  
GCF\_001654695.1\_ASM165469v1\_genomic.fna\_9:27-117 Satlength=91 Nr of  
Repeats=5 RepeatLength=18 seed=CTTGCTGTTT Num.seqs=5 Similarity=0.822222  
0 CTTGCTGTTTTTGTGTT  
Rev.of\_GCF\_001889165.1\_ASM188916v1\_genomic.fna\_1:1564134-1564404  
Satlength=271 Nr of Repeats=15 RepeatLength=18 seed=AGCAAGCAAA  
Num.seqs=15 Similarity=0.886420  
0 CCTGCTGNTTTGCTTGCT

\* \*\*\*\*\* \*\*\* \*\*\* \*  
Consensus:

CcTGCTGtTTTgCtTGcT

>Bacillus\_Fam\_756\_18\_2 Nr. of seq. 2 Alignment length(with gaps) = 18  
Alignment score = 0.629630  
GCF\_002019645.1\_ASM201964v1\_genomic.fna\_1:3879414-3879792 Satlength=379  
Nr of Repeats=16 RepeatLength=18 seed=GGAAGTGGAT Num.seqs=13  
Similarity=0.867047 0  
GGAAGTGGATTTGCTCCT  
Rev.of\_GCF\_900111815.1\_PRJEB17078\_genomic.fna\_1:557922-558030  
Satlength=109 Nr of Repeats=6 RepeatLength=18 seed=CAAATCCGGA Num.seqs=6  
Similarity=0.911111 13  
GGATCCGATTTGGTGTT

\*\*\* \* \*\*\*\*\* \* \*  
Consensus:

GGAaCcGGATTTGcTccT

>Bacillus\_Fam\_757\_16\_2 Nr. of seq. 2 Alignment length(with gaps) = 16  
Alignment score = 0.625000  
GCF\_000331575.1\_ASM33157v1\_genomic.fna\_3:88190-88246 Satlength=57 Nr of  
Repeats=4 RepeatLength=14 seed=CTAATCAACC Num.seqs=4 Similarity=0.952381  
0 CT-AA-TCAACCAACA  
GCF\_900111815.1\_PRJEB17078\_genomic.fna\_1:149733-149838 Satlength=106 Nr  
of Repeats=7 RepeatLength=15 seed=GAAGTCAACC Num.seqs=7  
Similarity=0.923810  
2 CTGAAGTCAACCAA-A

\*\* \*\* \*\*\*\*\* \*  
Consensus:

CTgAAcTCAACCAAcA

>Bacillus\_Fam\_758\_15\_2 Nr. of seq. 2 Alignment length(with gaps) = 15  
Alignment score = 0.688889  
GCF\_001591545.1\_ASM159154v1\_genomic.fna\_1:1876062-1876140 Satlength=79 Nr  
of Repeats=6 RepeatLength=13 seed=TTATTGTTTT Num.seqs=6  
Similarity=1.000000 0  
TTATT--GTTTTTCC  
Rev.of\_GCF\_001591665.1\_ASM159166v1\_genomic.fna\_25:2727-2817 Satlength=91  
Nr of Repeats=6 RepeatLength=15 seed=AAAACATAAT Num.seqs=6  
Similarity=0.917037 12  
TTATTATGTTTTTCG

\*\*\*\*\*

Consensus:

TTATTatGTTTTTCc

>Bacillus\_Fam\_759\_15\_2 Nr. of seq. 2 Alignment length(with gaps) = 15  
Alignment score = 0.733333  
BACILLUS\_PSEUDALCALIPHILUS\_genomic.fna\_6:254208-254418 Satlength=211 Nr of  
Repeats=14 RepeatLength=15 seed=GGTGAACCCG Num.seqs=14  
Similarity=0.940415 0  
GGTGAACCCGGTGAT  
GCF\_000177235.2\_ASM17723v2\_genomic.fna\_1:793103-793946 Satlength=844 Nr  
of Repeats=20 RepeatLength=15 seed=GAACCAGGAG Num.seqs=19  
Similarity=0.916829 3  
GGCGAACCAGGAGAT

\*\* \*\*\*\*\* \*\* \*\*\*

Consensus:

GGcGAACCaGGaGAT

>Bacillus\_Fam\_760\_15\_2 Nr. of seq. 2 Alignment length(with gaps) = 15  
Alignment score = 0.666667  
GCF\_000299035.1\_ASM29903v1\_genomic.fna\_1:1198325-1198505 Satlength=181 Nr  
of Repeats=9 RepeatLength=15 seed=CAAAAACCAG Num.seqs=7  
Similarity=0.751984 0  
CAAAAACCAGAGGAN  
GCF\_001591445.1\_ASM159144v1\_genomic.fna\_34:41259-41319 Satlength=61 Nr of  
Repeats=4 RepeatLength=15 seed=GCTCCAAAAC Num.seqs=4 Similarity=0.851852  
12 CCAAAAACCAGGGGCT

\* \*\*\*\*\* \*\*

Consensus:

CaAAAACCAGaGGat

>Bacillus\_Fam\_761\_15\_2 Nr. of seq. 2 Alignment length(with gaps) = 15  
Alignment score = 0.733333  
GCF\_000474275.1\_Bmar1.0\_genomic.fna\_33:30569-30884 Satlength=316 Nr of  
Repeats=5 RepeatLength=15 seed=TTCTTGTTCT Num.seqs=3 Similarity=0.940741  
1 ATTCTTGTTCTTTGT  
GCF\_001636325.1\_ASM163632v1\_genomic.fna\_1:2526805-2527021 Satlength=217  
Nr of Repeats=7 RepeatLength=15 seed=CTTTTCTTT Num.seqs=5

Similarity=0.822222

3

GTTCTTTTCTTTTT

\*\*\*\*\* \* \*

Consensus:

TTCTTgTTCTTTgTa

>Bacillus\_Fam\_762\_15\_2 Nr. of seq. 2 Alignment length(with gaps) = 15

Alignment score = 1.000000

GCF\_000508325.1\_BAVI\_1\_genomic.fna\_72:39782-39857 Satlength=76 Nr of Repeats=5 RepeatLength=15 seed=GGCATGATGT Num.seqs=5 Similarity=0.911111

0 GGCATGATGTGCGGC

GCF\_001636315.1\_ASM163631v1\_genomic.fna\_1:5617727-5617892 Satlength=166

Nr of Repeats=8 RepeatLength=15 seed=GGCATGATGT Num.seqs=5

Similarity=0.946667

0

GGCATGATGTGCGGC

\*\*\*\*\*

Consensus:

GGCATGATGTGCGGC

>Bacillus\_Fam\_763\_15\_2 Nr. of seq. 2 Alignment length(with gaps) = 15

Alignment score = 0.644444

GCF\_001590785.1\_ASM159078v1\_genomic.fna\_1:386490-386730 Satlength=241 Nr of Repeats=16 RepeatLength=15 seed=CCAGGCAATG Num.seqs=16

Similarity=0.902963

0

CCAGGCAATGGCGAT

Rev.of\_GCF\_001591665.1\_ASM159166v1\_genomic.fna\_3:104200-104350

Satlength=151 Nr of Repeats=9 RepeatLength=15 seed=CCGCCACCGC Num.seqs=8

Similarity=0.866667

14

CCTGGCGGTGGCGGT

\*\* \*\*\* \* \*

Consensus:

CCaGGCaaTGGCGaT

>Bacillus\_Fam\_764\_15\_2 Nr. of seq. 2 Alignment length(with gaps) = 15

Alignment score = 0.844444

GCF\_001591445.1\_ASM159144v1\_genomic.fna\_9:114139-114289 Satlength=151 Nr of Repeats=10 RepeatLength=15 seed=GGCATTTCTT Num.seqs=10

Similarity=0.915062

0

GGCATTTCTTTGATC

Rev.of\_GCF\_001591485.1\_ASM159148v1\_genomic.fna\_3:51079-51340

Satlength=262 Nr of Repeats=5 RepeatLength=15 seed=AAAGAAATAC Num.seqs=3

Similarity=0.733333

11

GGTATTTCTTTNATC

\*\* \* \* \* \*

Consensus:

GGcATTTCTTTgATC



>Bacillus\_Fam\_765\_14\_2 Nr. of seq. 2 Alignment length(with gaps) = 14  
Alignment score = 0.738095  
GCF\_000948175.1\_BFA\_2\_A\_genomic.fna\_151:142349-142433 Satlength=85 Nr of  
Repeats=7 RepeatLength=12 seed=TTCTCTTTT Num.seqs=5 Similarity=0.844444  
9 TCTTTTTTC--TTC  
GCF\_001645555.1\_ASM164555v1\_genomic.fna\_6:7244-7314 Satlength=71 Nr of  
Repeats=5 RepeatLength=14 seed=TTCTTTTTTC Num.seqs=5 Similarity=1.000000  
11 TCTTTTTTCTTTTT

\*\* \*\*\*\*\*

Consensus:

TTcTCTTTTTTcTt

>Bacillus\_Fam\_766\_14\_2 Nr. of seq. 2 Alignment length(with gaps) = 14  
Alignment score = 0.714286  
GCF\_000948175.1\_BFA\_2\_A\_genomic.fna\_56:4896-4966 Satlength=71 Nr of  
Repeats=5 RepeatLength=14 seed=TCATTACATA Num.seqs=5 Similarity=1.000000  
0 TCATTACATATCCC  
Rev.of\_GCF\_001578185.1\_ASM157818v1\_genomic.fna\_1:2027719-2027775  
Satlength=57 Nr of Repeats=4 RepeatLength=14 seed=TAAGTGATAA Num.seqs=4  
Similarity=0.888889 3  
TTATTACTTATCAC

\* \*\*\*\*\* \*

Consensus:

TcATTACaTATCaC

>Bacillus\_Fam\_767\_12\_2 Nr. of seq. 2 Alignment length(with gaps) = 12  
Alignment score = 0.666667  
GCF\_000008505.1\_ASM850v1\_genomic.fna\_1:985966-986182 Satlength=217 Nr of  
Repeats=17 RepeatLength=12 seed=GGAGGAGTAG Num.seqs=16  
Similarity=0.905556  
0 GGAGGAGTAGTT  
GCF\_000331575.1\_ASM33157v1\_genomic.fna\_1:1528380-1528428 Satlength=49 Nr  
of Repeats=4 RepeatLength=12 seed=GGATGAGTTA Num.seqs=4  
Similarity=0.944444  
0 GGATGAGTTATT

\*\*\* \*\*\*\*\* \*\*

Consensus:

GGAgGAGTaaTT

>Bacillus\_Fam\_768\_12\_2 Nr. of seq. 2 Alignment length(with gaps) = 12  
Alignment score = 0.694444  
GCF\_000153365.1\_ASM15336v1\_genomic.fna\_8:85710-85779 Satlength=70 Nr of  
Repeats=5 RepeatLength=12 seed=CCTGAGCCTG Num.seqs=4 Similarity=0.759259  
0 CCTGAACCTGAG  
GCF\_000294775.2\_ASM29477v2\_genomic.fna\_2:295544-295664 Satlength=121 Nr  
of Repeats=5 RepeatLength=12 seed=AGCCTAAGCC Num.seqs=3

Similarity=0.666667

4 CCTNAGCCTAAG

\*\*\* \* \*\*\* \*\*

Consensus:

CCTgAaCCTaAG

>Bacillus\_Fam\_769\_12\_2 Nr. of seq. 2 Alignment length(with gaps) = 12

Alignment score = 0.666667

GCF\_000161455.1\_ASM16145v1\_genomic.fna\_1:5124264-5124372 Satlength=109 Nr of Repeats=4 RepeatLength=12 seed=TGGTTTTTCT Num.seqs=3

Similarity=1.000000

0

TGGTTTTTCTGT

Rev.of\_GCF\_000474275.1\_Bmar1.0\_genomic.fna\_3:52284-52332 Satlength=49 Nr of Repeats=4 RepeatLength=12 seed=AAAGAAATGC Num.seqs=4

Similarity=0.925926

0 TGGCATTCTTT

\*\*\* \*\*\*\*\* \*

Consensus:

TGGCaTTCTgT

>Bacillus\_Fam\_770\_12\_2 Nr. of seq. 2 Alignment length(with gaps) = 12

Alignment score = 0.805556

GCF\_000334155.1\_L1\_genomic.fna\_72:536-620 Satlength=85 Nr of Repeats=7 RepeatLength=12 seed=GATGCTGATG Num.seqs=7 Similarity=0.851852

0 GATGCTGATGCN

Rev.of\_GCF\_002019765.1\_ASM201976v1\_genomic.fna\_1:3481582-3481660

Satlength=79 Nr of Repeats=5 RepeatLength=12 seed=GCATCCGCAT Num.seqs=3

Similarity=0.925926

5

GATGCCGATGCG

\*\*\*\*\* \*\*\*\*\*

Consensus:

GATGCcGATGCg

>Bacillus\_Fam\_771\_12\_2 Nr. of seq. 2 Alignment length(with gaps) = 12

Alignment score = 0.666667

GCF\_000430785.1\_ASM43078v1\_genomic.fna\_20:47240-47348 Satlength=109 Nr of Repeats=9 RepeatLength=12 seed=CCTGGAGGAA Num.seqs=9 Similarity=0.913580

0 CCTGGAGGAACA

Rev.of\_GCF\_900093775.1\_EVONIK\_BGLY\_genomic.fna\_1:4560190-4560334

Satlength=145 Nr of Repeats=12 RepeatLength=12 seed=GTTGTTCCAC

Num.seqs=12 Similarity=0.922559

2 ACAGGTGGAACA

\* \*\* \*\*\*\*\*

Consensus:

aCaGGaGGAACA

>Bacillus\_Fam\_772\_12\_2 Nr. of seq. 2 Alignment length(with gaps) = 12  
Alignment score = 0.777778  
GCF\_000986785.1\_ASM98678v1\_genomic.fna\_40:25576-25696 Satlength=121 Nr of  
Repeats=8 RepeatLength=12 seed=TCATGGCTGT Num.seqs=6 Similarity=0.933333  
0 TCATGGCTGTGA  
GCF\_002009555.1\_ASM200955v1\_genomic.fna\_559:81-135 Satlength=55 Nr of  
Repeats=4 RepeatLength=12 seed=TGATCATGGT Num.seqs=3 Similarity=0.925926  
9 TCATGGTCGTGA

\*\*\*\*\* \*\*\*\*

Consensus:

TCATGGccGTGA

>Bacillus\_Fam\_773\_12\_2 Nr. of seq. 2 Alignment length(with gaps) = 12  
Alignment score = 0.777778  
GCF\_001273755.1\_ASM127375v1\_genomic.fna\_17:3004884-3004968 Satlength=85  
Nr of Repeats=6 RepeatLength=12 seed=TTGAACTGGT Num.seqs=5  
Similarity=0.866667 0  
TTGAACTGGTTG  
Rev.of\_GCF\_001315045.1\_ASM131504v1\_genomic.fna\_15:59765-60074  
Satlength=310 Nr of Repeats=6 RepeatLength=12 seed=ATGCAACAAC Num.seqs=4  
Similarity=0.925926 6  
TTGCATTGGTTG

\*\*\* \* \*\*\*\*\*

Consensus:

TTGaAcTGGTTG

>Bacillus\_Fam\_774\_12\_2 Nr. of seq. 2 Alignment length(with gaps) = 12  
Alignment score = 0.777778  
GCF\_002019645.1\_ASM201964v1\_genomic.fna\_1:1577470-1577590 Satlength=121  
Nr of Repeats=10 RepeatLength=12 seed=CTGGAACAGA Num.seqs=10  
Similarity=0.916049 0  
CTGGAACAGACC  
Rev.of\_GCF\_900104555.1\_IMG-  
taxon\_2651870172\_annotated\_assembly\_genomic.fna\_22:386175-386367  
Satlength=193 Nr of Repeats=15 RepeatLength=12 seed=TCTGTTCCTG  
Num.seqs=14 Similarity=0.925519 10 CAGGAACAGATC

\* \*\*\*\*\* \*

Consensus:

CaGGAACAGAcC

>Bacillus\_Fam\_775\_11\_2 Nr. of seq. 2 Alignment length(with gaps) = 11  
Alignment score = 0.636364  
GCF\_000238675.1\_Baci\_smit\_7\_3\_47FAA\_V1\_genomic.fna\_4:38733-38800  
Satlength=68 Nr of Repeats=4 RepeatLength=11 seed=GTTTCTATAT Num.seqs=3  
Similarity=0.919192 0  
GTTTCTATATG

Rev.of\_GCF\_000751775.1\_A1A\_genomic.fna\_2:555-599 Satlength=45 Nr of  
Repeats=4 RepeatLength=11 seed=GAAACAATAC Num.seqs=4 Similarity=0.939394  
5 GTTTCGGTATT

\*\*\*\*\* \*\*\*

Consensus:

GTTTCgaTATg

>Bacillus\_Fam\_776\_321\_1 Nr. of seq. 1 Alignment length(with gaps) = 321  
Alignment score = 0.000000  
GCF\_000242895.2\_ASM24289v3\_genomic.fna\_1:4312051-4313392 Satlength=1342  
Nr of Repeats=5 RepeatLength=321 seed=TGAACGTTAC Num.seqs=4  
Similarity=0.939772 0  
TGAACGTTACGGTATGTCTTCCATCTCTAAATTTGGTTGTGTCGAGAGTATAATGAAAGCCACCATTCCCATT  
GTGGTACTCTGGAAAGACTTTCTGGACATCTGGTCTCGCATCTCCATAGATCGCCTGACCTGCCACTACACCG  
TCTACCAGTACTTCAATTTTCGACACTCCGCTTTCATCTAAAAACCAGCCCCGTACGTTTTGGGACCCGATAA  
GTGTTTTGCCAGAAACCGGATCATCGATATACCCGAGGACATTTGCAATCGTTATAGTCTTTTCAGGCAATGT  
TGTGACATAGCCGTTTCCTGTTTCTC

\*\*\*\*\*  
\*\*\*\*\*  
\*\*\*\*\*  
\*\*\*\*\*  
\*\*\*\*\*

Consensus:

TGAACGTTACGGTATGTCTTCCATCTCTAAATTTGGTTGTGTCGAGAGTATAATGAAAGCCACCATTCCCATT  
GTGGTACTCTGGAAAGACTTTCTGGACATCTGGTCTCGCATCTCCATAGATCGCCTGACCTGCCACTACACCG  
TCTACCAGTACTTCAATTTTCGACACTCCGCTTTCATCTAAAAACCAGCCCCGTACGTTTTGGGACCCGATAA  
GTGTTTTGCCAGAAACCGGATCATCGATATACCCGAGGACATTTGCAATCGTTATAGTCTTTTCAGGCAATGT  
TGTGACATAGCCGTTTCCTGTTTCTC

>Bacillus\_Fam\_777\_255\_1 Nr. of seq. 1 Alignment length(with gaps) = 255  
Alignment score = 0.000000  
BACILLUS\_PSEUDALCALIPHILUS\_genomic.fna\_16:50-1069 Satlength=1020 Nr of  
Repeats=4 RepeatLength=255 seed=AGTAGGACGT Num.seqs=3  
Similarity=0.920573  
0

AGTAGGACGTTGCCAGGCAGATTAAACACANTCCTTTAGGGATGTGTTTTTTAATATGCATAAAGAGTATACT  
CGGCGCAAAAAGAGCGCTGGTTCTGAAGAAGCAGCCCCCTACGAAGCGAAGCCCCGGAAGCGATCGAAGGAAGAA  
AACCAAGTACGTTTCGCGAGACGAATCGGTTCTCTTCGTGCGACCTCGTGAGAGGCATCGGGGAAATCGCTACA  
TGCCATACTTCCCCGAAGAAGAGAATCCGAAGAGAC

\*\*\*\*\*  
\*\*\*\*\*  
\*\*\*\*\*  
\*\*\*\*\*

Consensus:

AGTAGGACGTTGCCAGGCAGATTAAACACANTCCTTTAGGGATGTGTTTTTTAATATGCATAAAGAGTATACT  
CGGCGCAAAAAGAGCGCTGGTTCTGAAGAAGCAGCCCCCTACGAAGCGAAGCCCCGGAAGCGATCGAAGGAAGAA  
AACCAAGTACGTTTCGCGAGACGAATCGGTTCTCTTCGTGCGACCTCGTGAGAGGCATCGGGGAAATCGCTACA  
TGCCATACTTCCCCGAAGAAGAGAATCCGAAGAGAC

>Bacillus\_Fam\_778\_252\_1 Nr. of seq. 1 Alignment length(with gaps) = 252  
Alignment score = 0.000000  
GCF\_000169195.2\_ASM16919v2\_genomic.fna\_1:915504-916512 Satlength=1009 Nr  
of Repeats=4 RepeatLength=252 seed=TTTGTCTCG Num.seqs=4  
Similarity=0.906526 0  
TTTTGCTTCGATTTAATCCTGACTGAGAAGCTACCTTTACTACTTGCTGTCCCTGTCCCCAGCACCGTTTTAC  
CACGTTTAATCGTCACCTTTGGCGCCGGCTTCTGCTTTACCTGTAATCGTTGTTTGATTATCGCCAAACCGATT  
GACGGACGGGGCTGATGGTGCTGTTTTGTCTTCCACTTTGAACGATTTGCCTGCACCCGTATTTCCAGCTTTA  
TCTGTGCGCATAGGCTGTCAGAACCGTTCCTGCC

\*\*\*\*\*  
\*\*\*\*\*  
\*\*\*\*\*  
\*\*\*\*\*

Consensus:

TTTTGCTTCGATTTAATCCTGACTGAGAAGCTACCTTTACTACTTGCTGTCCCTGTCCCCAGCACCGTTTTAC  
CACGTTTAATCGTCACCTTTGGCGCCGGCTTCTGCTTTACCTGTAATCGTTGTTTGATTATCGCCAAACCGATT  
GACGGACGGGGCTGATGGTGCTGTTTTGTCTTCCACTTTGAACGATTTGCCTGCACCCGTATTTCCAGCTTTA  
TCTGTGCGCATAGGCTGTCAGAACCGTTCCTGCC

>Bacillus\_Fam\_779\_249\_1 Nr. of seq. 1 Alignment length(with gaps) = 249  
Alignment score = 0.000000  
GCF\_000832905.1\_ASM83290v1\_genomic.fna\_1:2746746-2747991 Satlength=1246  
Nr of Repeats=5 RepeatLength=249 seed=AAACAAAAAG Num.seqs=5  
Similarity=0.824409 0  
AAACAAAAAGCAGGAACGAAGCTTGTCGTTTATGCGGAAGATGCGGCAGGGAACAAGAGCGNTGAAACNGTNG  
TAACGGTTATTGATAAAACGGCTCCGGCAGCGCCGAAAGTCGGAGAAAGTAAGCGATACAAGTACTGTGGTTAC  
AGGAACCACAGAAGCGGGCGCGAAAGTAACAGTAAATCCGGCTCGAACATTTTAGGNACGGCAACGGCTGAT  
CATACCGGTGCATTTAAGGTAACCATTGCA

\*\*\*\*\*  
\*\*\*\*\*  
\*\*\*\*\*  
\*\*\*\*\*

Consensus:

AAACAAAAAGCAGGAACGAAGCTTGTCGTTTATGCGGAAGATGCGGCAGGGAACAAGAGCGNTGAAACNGTNG  
TAACGGTTATTGATAAAACGGCTCCGGCAGCGCCGAAAGTCGGAGAAAGTAAGCGATACAAGTACTGTGGTTAC  
AGGAACCACAGAAGCGGGCGCGAAAGTAACAGTAAATCCGGCTCGAACATTTTAGGNACGGCAACGGCTGAT  
CATACCGGTGCATTTAAGGTAACCATTGCA

>Bacillus\_Fam\_780\_246\_1 Nr. of seq. 1 Alignment length(with gaps) = 246  
Alignment score = 0.000000  
GCF\_001591445.1\_ASM159144v1\_genomic.fna\_67:6172-7645 Satlength=1474 Nr of  
Repeats=5 RepeatLength=246 seed=GTTTTATCTA Num.seqs=3  
Similarity=0.792231  
0

GTTTTATCTACTTTTACTTCTACTGTGTTTTTATTTTCNGTATTACCNGCATTATCTACACTGTAGTAAGTTA  
GAGTGTGGATGCCTTCTTTTTCTANGGTNAAGCTTGTGCCTTCGCTGAATTCAGCNCCATCGATAGAATAGTA  
GGTTGCTTTCACACCGCTTAGGTCATCAGTTGCTGTCAGCTCAACATTCAGTCTTCTGTGTACCATTTGATCC  
TCGACATTACTTACAGTAGTAGGAGCA

\*\*\*\*\*  
\*\*\*\*\*  
\*\*\*\*\*  
\*\*\*\*\*

Consensus :

GTTTTATCTACTTTTACTTCTACTGTGTTTTTATTTTCNGTATTACCNGCATTATCTACACTGTAGTAAGTTA  
GAGTGTGGATGCCTTCTTTTTCTANGGTNAAGCTTGTGCCTTCGCTGAATTCAGCNCCATCGATAGAATAGTA  
GGTTGCTTTCACACCGCTTAGGTCATCAGTTGCTGTCAGCTCAACATTCACTGCTTCTGTGTACCATTGATCC  
TCGACATTACTTACAGTAGTAGGAGCA

>Bacillus\_Fam\_781\_237\_1 Nr. of seq. 1 Alignment length(with gaps) = 237  
Alignment score = 0.000000  
GCF\_000374565.1\_ASM37456v1\_genomic.fna\_37:21075-21996 Satlength=922 Nr of  
Repeats=4 RepeatLength=237 seed=CCATTGGCTT Num.seqs=3  
Similarity=0.889358

0  
CCATTGGCTTTCACCCTTGCCAGCCGTTTCGATTTCGGATATCACTGATACTGCCGTTCCGCTGGACAGCTTGC  
TTATCACTTTTCCTTGTGTAGACGCCTTGTCTCGGACATTTCAGCGAGGATCCAGAGTCGACTTTACATATTT  
GGTAACCGGNTTGGCCGACGGTTTTGGTGTACCTGTGCTGGCTGACGGCTTGCTTGATGACAAATATTGTGAA  
CTTACGTAGCCTGTTTTG

\*\*\*\*\*  
\*\*\*\*\*  
\*\*\*\*\*  
\*\*\*\*\*

Consensus :

CCATTGGCTTTCACCCTTGCCAGCCGTTTCGATTTCGGATATCACTGATACTGCCGTTCCGCTGGACAGCTTGC  
TTATCACTTTTCCTTGTGTAGACGCCTTGTCTCGGACATTTCAGCGAGGATCCAGAGTCGACTTTACATATTT  
GGTAACCGGNTTGGCCGACGGTTTTGGTGTACCTGTGCTGGCTGACGGCTTGCTTGATGACAAATATTGTGAA  
CTTACGTAGCCTGTTTTG

>Bacillus\_Fam\_782\_237\_1 Nr. of seq. 1 Alignment length(with gaps) = 237  
Alignment score = 0.000000  
GCF\_001315065.1\_ASM131506v1\_genomic.fna\_1:413-1597 Satlength=1185 Nr of  
Repeats=5 RepeatLength=237 seed=TATACGTTTG Num.seqs=4  
Similarity=0.781528

0  
TATACGTTTGTTGGCTGGAACACCGAAGCGGATGGAAGTGGTGAAACCTATAAAGAGGGTGACACGTTTACCC  
AAGGAATAGGAAATGTGACGTTCTATGCGCAGTGGTCTGTAAATCACTACGAGCTGCGATATGACGGGAACGG  
GCAAGATGGAGGAAGTGCGCCAGAAGCGGAATCTGTTGCGTATGGAAGTGAAGTGGAGGTATCGGATTCTCAA  
ACGTTAAGCCGAACCGGT

\*\*\*\*\*  
\*\*\*\*\*  
\*\*\*\*\*  
\*\*\*\*\*

Consensus :

TATACGTTTGTTGGCTGGAACACCGAAGCGGATGGAAGTGGTGAAACCTATAAAGAGGGTGACACGTTTACCC  
AAGGAATAGGAAATGTGACGTTCTATGCGCAGTGGTCTGTAAATCACTACGAGCTGCGATATGACGGGAACGG

GCAAGATGGAGGAAGTGCGCCAGAAGCGGAATCTGTTGCGTATGGAAGTGAAGTGGAGGTATCGGATTCTCAA  
ACGTTAAGCCGAACCGGT

>Bacillus\_Fam\_783\_234\_1 Nr. of seq. 1 Alignment length(with gaps) = 234  
Alignment score = 0.000000  
GCF\_000712615.1\_ASM71261v1\_genomic.fna\_7:32135-33194 Satlength=1060 Nr of  
Repeats=5 RepeatLength=234 seed=TTACTTTTTC Num.seqs=4  
Similarity=0.888889  
0

TTACTTTTCTCCGTTTTTTTAAATTTCCGAGAATTGCACTATTTGTATTTGCTTGACTTCTTACTCGCAGGCT  
CGTTGCGTTGATTGTTCCGCTTTCTTGTAATCCATTTGTGATGTCTTCAACTGGCTTTTCTTCTGTTTCCCA  
GCTTCTAGCTTCACAACTCTAACGATACGTAACCTTCTTTTCTTTATAATTGATCTTCGCCCAGCCGTTTG  
CTTTTCCTAAGATTG

\*\*\*\*\*  
\*\*\*\*\*  
\*\*\*\*\*  
\*\*\*\*\*

Consensus:

TTACTTTTCTCCGTTTTTTTAAATTTCCGAGAATTGCACTATTTGTATTTGCTTGACTTCTTACTCGCAGGCT  
CGTTGCGTTGATTGTTCCGCTTTCTTGTAATCCATTTGTGATGTCTTCAACTGGCTTTTCTTCTGTTTCCCA  
GCTTCTAGCTTCACAACTCTAACGATACGTAACCTTCTTTTCTTTATAATTGATCTTCGCCCAGCCGTTTG  
CTTTTCCTAAGATTG

>Bacillus\_Fam\_784\_232\_1 Nr. of seq. 1 Alignment length(with gaps) = 232  
Alignment score = 0.000000  
GCF\_000752035.1\_Bacillus\_rubiinfantis\_genomic.fna\_11:577590-580142  
Satlength=2553 Nr of Repeats=11 RepeatLength=232 seed=TTCCATTTGA  
Num.seqs=11 Similarity=0.994984 0

TTCCATTTGACTCCTCTGTGTTAGACGGAGAAATTCCGTTTATCTCGGGAAATACTACTATTTCCCTTGAATT  
AAGGGAAGCTTTTCCGCTTATATGATCCAAATCCTTGGATTTTGCCTTTTTTGAAGGTAGTAAGCGGAATTC  
TACCCTTATATCTCCCCTTTAAGCCGCAAAATTTTCATTAGACGGAAATTCCTCGCTTATGCTTCTCCACCTT  
ATCCTTTGGCAAC

\*\*\*\*\*  
\*\*\*\*\*  
\*\*\*\*\*  
\*\*\*\*\*

Consensus:

TTCCATTTGACTCCTCTGTGTTAGACGGAGAAATTCCGTTTATCTCGGGAAATACTACTATTTCCCTTGAATT  
AAGGGAAGCTTTTCCGCTTATATGATCCAAATCCTTGGATTTTGCCTTTTTTGAAGGTAGTAAGCGGAATTC  
TACCCTTATATCTCCCCTTTAAGCCGCAAAATTTTCATTAGACGGAAATTCCTCGCTTATGCTTCTCCACCTT  
ATCCTTTGGCAAC

>Bacillus\_Fam\_785\_231\_1 Nr. of seq. 1 Alignment length(with gaps) = 231  
Alignment score = 0.000000  
GCF\_000334155.1\_L1\_genomic.fna\_143:18667-20053 Satlength=1387 Nr of  
Repeats=6 RepeatLength=231 seed=GAAAAACTTG Num.seqs=6  
Similarity=0.992304  
0

GAAAAACTTGTTGCCGCTAGATTTTCTGTAAATTGCCCTCTTTACTTGTCATTTGCTGTCTTTCCATTCGAA  
GATAGCAGTTCAGCGGCAGCCTTAGCTTTTTCTTACCTCCCTTCAGCCACGCTCTTTACCCCTTAATAATGG

TTGTTCAAGAAAAACAAGCCTGTTTTTCCACCTCTCTTTATGACAGGGAGGAATCACTTCTCTTTTTGCCTTC  
AACCTTTATTTTC

\*\*\*\*\*  
\*\*\*\*\*  
\*\*\*\*\*  
\*\*\*\*\*

Consensus:

GAAAAACTTGGTTGCCGCTAGATTTTCTGTAAATTGCCCTCTTTACTTGTTCATTTGCTGTCTTTCCATTTCGAA  
GATAGCAGTTTCAGCGGCAGCCTTAGCTTTTTCTTACCTCCCTTCAGCCACGCTCTTTCACCCTTAATAATGG  
TTGTTCAAGAAAAACAAGCCTGTTTTTCCACCTCTCTTTATGACAGGGAGGAATCACTTCTCTTTTTGCCTTC  
AACCTTTATTTTC

>Bacillus\_Fam\_786\_231\_1 Nr. of seq. 1 Alignment length(with gaps) = 231  
Alignment score = 0.000000  
GCF\_001273755.1\_ASM127375v1\_genomic.fna\_17:4450455-4451425 Satlength=971  
Nr of Repeats=5 RepeatLength=231 seed=GTTGTCGATA Num.seqs=4  
Similarity=0.870130 0  
GTTGTCGATAAATATTTAGTACTGACATATCCTTCTTTTCCATTAGCTTTGATCTTCGCCCAACCTTTAGATT  
CCGAATACACCGTTACCTGCATGCCTTTTCGAAAGCTTCGCAACTATGCTGGCAGTTTCCGTCCCACCTTTTTCG  
CATATTGAGCGTCCCAGAACTTACATTTACATATTTTCGTTCGTTCGTTTAAACAGGGGTGGATGGTGTGGAACCC  
GTTACAGGCTTC

\*\*\*\*\*  
\*\*\*\*\*  
\*\*\*\*\*  
\*\*\*\*\*

Consensus:

GTTGTCGATAAATATTTAGTACTGACATATCCTTCTTTTCCATTAGCTTTGATCTTCGCCCAACCTTTAGATT  
CCGAATACACCGTTACCTGCATGCCTTTTCGAAAGCTTCGCAACTATGCTGGCAGTTTCCGTCCCACCTTTTTCG  
CATATTGAGCGTCCCAGAACTTACATTTACATATTTTCGTTCGTTCGTTTAAACAGGGGTGGATGGTGTGGAACCC  
GTTACAGGCTTC

>Bacillus\_Fam\_787\_230\_1 Nr. of seq. 1 Alignment length(with gaps) = 230  
Alignment score = 0.000000  
GCF\_000334155.1\_L1\_genomic.fna\_48:14925-15845 Satlength=921 Nr of  
Repeats=4 RepeatLength=230 seed=GAACAACCAT Num.seqs=4  
Similarity=0.993237  
0  
GAACAACCATTTATGAAGGGTGAGAGAGGGGAAAAGTTTGGGAAGTAAGAAAAGCTAAGGGCTCTGCCGAACTTC  
CGTCTTTGAAGGGAGGAAAGAGGACTTCGAAAAGAATGCACTCTTTAAAAAGAATCTGGCAGAGCCCAAGCTT  
TGAAACAGAGGTTTATAAGGTCTGAAAAAGAGCGCCCTCCCTATCATAAAGAGGGGAGGAAAAACAGCGGT  
CTGTTTTTCTC

\*\*\*\*\*  
\*\*\*\*\*  
\*\*\*\*\*  
\*\*\*\*\*

Consensus:

GAACAACCATTTATGAAGGGTGAGAGAGGGGAAAAGTTTGGGAAGTAAGAAAAGCTAAGGGCTCTGCCGAACTTC  
CGTCTTTGAAGGGAGGAAAGAGGACTTCGAAAAGAATGCACTCTTTAAAAAGAATCTGGCAGAGCCCAAGCTT



TGAAACAGAGGTTTATAAGGTCTGAAAAAGAGCGCCCCTCCCCTATCATAAAGAGGGGAGGAAAAACAGCGGT  
CTGTTTTTCTC

>Bacillus\_Fam\_788\_226\_1 Nr. of seq. 1 Alignment length(with gaps) = 226  
Alignment score = 0.000000  
GCF\_000504145.1\_SOAPdenovo\_for\_version2.04\_of\_Bacillus\_sp.\_FJAT-  
14515\_genome\_genomic.fna\_1:1737292-1738401 Satlength=1110 Nr of Repeats=5  
RepeatLength=226 seed=ATTTACGTGC Num.seqs=3 Similarity=0.9724 0  
ATTTACGTGCCGATTTGGCTTCTTTTCGGTCCGGAACGGAGCTCTTTCGTGCCGAAATCATCACTTTTCGAGC  
GAGATTGGCGATTTTCGCGCCGGAGCTTAAATCTCTACGGTTCAACCACTTAATTACTATTTTTTTATGAACC  
CCGTTGCTGTCCAGTTATGTTAGCTATGGCACATCAGCTAATGCACATGCACAAACCATCATTACGGGCCCG  
ATTTCAA

\*\*\*\*\*  
\*\*\*\*\*  
\*\*\*\*\*  
\*\*\*\*\*

Consensus:

ATTTACGTGCCGATTTGGCTTCTTTTCGGTCCGGAACGGAGCTCTTTCGTGCCGAAATCATCACTTTTCGAGC  
GAGATTGGCGATTTTCGCGCCGGAGCTTAAATCTCTACGGTTCAACCACTTAATTACTATTTTTTTATGAACC  
CCGTTGCTGTCCAGTTATGTTAGCTATGGCACATCAGCTAATGCACATGCACAAACCATCATTACGGGCCCG  
ATTTCAA

>Bacillus\_Fam\_789\_226\_1 Nr. of seq. 1 Alignment length(with gaps) = 226  
Alignment score = 0.000000  
GCF\_001274935.1\_ASM127493v1\_genomic.fna\_27:538477-539381 Satlength=905 Nr  
of Repeats=4 RepeatLength=226 seed=GCTTCGCTTT Num.seqs=4  
Similarity=0.853314 0  
GCTTCGCTTTCCTCGGGCGAGCGCTGAGCTTCCTCGTCGTTTCTCTCCTGCGGGATCTCACCTGTCTCGCTC  
ATCCCGTAGGAGTCTTCTCATCTTTCACTGCCTTCCTTTGGTCTTTTCGACTAGGAAGTATTTAGTAGCCTGCT  
TTTTGGAATGTGTATTTAGATAAGCTATGTTTATTCCACATGAAACACCCTTTACTTAGTCGGATTCCAGCT  
CCAGATT

\*\*\*\*\*  
\*\*\*\*\*  
\*\*\*\*\*  
\*\*\*\*\*

Consensus:

GCTTCGCTTTCCTCGGGCGAGCGCTGAGCTTCCTCGTCGTTTCTCTCCTGCGGGATCTCACCTGTCTCGCTC  
ATCCCGTAGGAGTCTTCTCATCTTTCACTGCCTTCCTTTGGTCTTTTCGACTAGGAAGTATTTAGTAGCCTGCT  
TTTTGGAATGTGTATTTAGATAAGCTATGTTTATTCCACATGAAACACCCTTTACTTAGTCGGATTCCAGCT  
CCAGATT

>Bacillus\_Fam\_790\_225\_1 Nr. of seq. 1 Alignment length(with gaps) = 225  
Alignment score = 0.000000  
GCF\_000011145.1\_ASM1114v1\_genomic.fna\_1:3777785-3778688 Satlength=904 Nr  
of Repeats=4 RepeatLength=225 seed=AAGCTTGATG Num.seqs=3  
Similarity=0.854136 0  
AAGCTTGATGAGGTTTTAAACGGGAAGTCTAGACCTGCCACTCTTCGCTTTGGTGACCGTCATCCGTACGTCA  
TTCAGCTTAAAAAGATTTAGCTGAAGCAGGATTCCCGGTCTCCGGTAGCCCGACGGAGTATTTTGATCAGT  
CACCGAATCCCAAGTCAAGGCTTTCCAACGAGCTCACGGACTTACTGCTAATGGCGTTGTCGGATCTGCTACT  
TACGCA

\*\*\*\*\*  
\*\*\*\*\*  
\*\*\*\*\*  
\*\*\*\*\*

Consensus:

AAGCTTGATGAGGTTTTAAACGGGAACCTCTAGACCTGCCACTCTTCGCTTTGGTGACCGTCATCCGTACGTCA  
TTCAGCTTAAAAAAGATTTAGCTGAAGCAGGATTCCTCGGTCTCCGGTAGCCCCGACGGAGTATTTTGGATCAGT  
CACCGAATCCCAAGTCAAGGCTTTCCAACGAGCTCACGGACTTACTGCTAATGGCGTTGTCGGATCTGCTACT  
TACGCA

>Bacillus\_Fam\_791\_222\_1 Nr. of seq. 1 Alignment length(with gaps) = 222  
Alignment score = 0.000000  
GCF\_001645705.1\_ASM164570v1\_genomic.fna\_11:129111-130005 Satlength=895 Nr  
of Repeats=4 RepeatLength=222 seed=TTATCCAAAC Num.seqs=3  
Similarity=0.657698 0  
TTATCCAAACTGATTAACCACGCAAAAACATATGAAAAGGATAAATATACCGAACTTCATACGGNGCNCTGC  
AACAAGCAATTAGCCATGCNGAAGCAGTGGTACAAAATGCGAANACACAAGATGAAGTAACGGAAGCNATTAG  
TCNTCTCCAAAAGCGATTAATGGATTAGAAAAAATAGCAGAACCAGAACCAGAANCTGAAGTAGATACGGGC  
GAG

\*\*\*\*\*  
\*\*\*\*\*  
\*\*\*\*\*  
\*\*\*

Consensus:

TTATCCAAACTGATTAACCACGCAAAAACATATGAAAAGGATAAATATACCGAACTTCATACGGNGCNCTGC  
AACAAGCAATTAGCCATGCNGAAGCAGTGGTACAAAATGCGAANACACAAGATGAAGTAACGGAAGCNATTAG  
TCNTCTCCAAAAGCGATTAATGGATTAGAAAAAATAGCAGAACCAGAACCAGAANCTGAAGTAGATACGGGC  
GAG

>Bacillus\_Fam\_792\_219\_1 Nr. of seq. 1 Alignment length(with gaps) = 219  
Alignment score = 0.000000  
GCF\_001484965.1\_ASM148496v1\_genomic.fna\_12:79253-81209 Satlength=1957 Nr  
of Repeats=8 RepeatLength=219 seed=GATGGGTTC Num.seqs=5  
Similarity=0.860578 0  
GATGGGTTCCTGCGGAGTACTTAAATGTCAGTGGGTCTGGGCAGCGATGCGAGTGAAGGGTCTTCCTCCATTGG  
ATCGGCTACCACNACCGCAAGGCTTAACCTTCGCTCCGGTGCAGGGACTTCGAATCGTATTTTAACGACATTG  
AACAACGGGCAGAACGTNGCCTTGCTTCAGAAACAAGGCAACTGGTATCAGGTAAAGCCGGTTCTCAGACGG

\*\*\*\*\*  
\*\*\*\*\*  
\*\*\*\*\*  
Consensus:

GATGGGTTCCTGCGGAGTACTTAAATGTCAGTGGGTCTGGGCAGCGATGCGAGTGAAGGGTCTTCCTCCATTGG  
ATCGGCTACCACNACCGCAAGGCTTAACCTTCGCTCCGGTGCAGGGACTTCGAATCGTATTTTAACGACATTG  
AACAACGGGCAGAACGTNGCCTTGCTTCAGAAACAAGGCAACTGGTATCAGGTAAAGCCGGTTCTCAGACGG

>Bacillus\_Fam\_793\_214\_1 Nr. of seq. 1 Alignment length(with gaps) = 214  
Alignment score = 0.000000

GCF\_002019645.1\_ASM201964v1\_genomic.fna\_1:4390066-4391018 Satlength=953  
Nr of Repeats=5 RepeatLength=214 seed=TCAGGGTAGA Num.seqs=3  
Similarity=1.000000 0  
TCAGGGTAGACCTTTATGCGAATAAGTATTGGCACCATGGAAGATGAAAAAGTTTTATACTCAGTGTGGAATG  
AGCAGAGAGTCACCTGACTCCTGCGGGATCTAGCGGTCTCGTGAGACCCCGCAGGAGCCAAAAGCGACGAGGA  
GGCTCACGGGGCGCCCCGCGGAAAGCAGGTGGATCGCAGCGAATGGAATCCACTATCTAAGTTATTT

\*\*\*\*\*  
\*\*\*\*\*  
\*\*\*\*\*

Consensus:

TCAGGGTAGACCTTTATGCGAATAAGTATTGGCACCATGGAAGATGAAAAAGTTTTATACTCAGTGTGGAATG  
AGCAGAGAGTCACCTGACTCCTGCGGGATCTAGCGGTCTCGTGAGACCCCGCAGGAGCCAAAAGCGACGAGGA  
GGCTCACGGGGCGCCCCGCGGAAAGCAGGTGGATCGCAGCGAATGGAATCCACTATCTAAGTTATTT

>Bacillus\_Fam\_794\_213\_1 Nr. of seq. 1 Alignment length(with gaps) = 213  
Alignment score = 0.000000  
GCF\_000009825.1\_ASM982v1\_genomic.fna\_1:3219845-3221123 Satlength=1279 Nr  
of Repeats=6 RepeatLength=213 seed=CGCCTTAACT Num.seqs=6  
Similarity=0.931142 0  
CGCCTTAACTTGCGTTCTGGAGCAGGCACTAACCATAGCATTATCACTACCCTTGCTAAAGGACAAAAAGTCG  
AGTTGCTTAAAAAGCAAGGTGGCTGGTACCAAGTTAAAGCGGGCAACCGTACTGGATGGGTTTCTGTTGACTA  
CTTAAATGTCAGCGGCTCTGGCAATGTGGACAACGCTCCTTCTAACGGCTCTGCCACAACCACTGCA

\*\*\*\*\*  
\*\*\*\*\*  
\*\*\*\*\*

Consensus:

CGCCTTAACTTGCGTTCTGGAGCAGGCACTAACCATAGCATTATCACTACCCTTGCTAAAGGACAAAAAGTCG  
AGTTGCTTAAAAAGCAAGGTGGCTGGTACCAAGTTAAAGCGGGCAACCGTACTGGATGGGTTTCTGTTGACTA  
CTTAAATGTCAGCGGCTCTGGCAATGTGGACAACGCTCCTTCTAACGGCTCTGCCACAACCACTGCA

>Bacillus\_Fam\_795\_213\_1 Nr. of seq. 1 Alignment length(with gaps) = 213  
Alignment score = 0.000000  
GCF\_000177235.2\_ASM17723v2\_genomic.fna\_1:414216-415493 Satlength=1278 Nr  
of Repeats=6 RepeatLength=213 seed=CCACCAGAAA Num.seqs=5  
Similarity=0.785426 0  
CCACCAGAAAAAGAAGGCCATTCAATTCAAAGGATGGTATCAAGATGAGTTGCTCACAGAAGCGTGGGATTTTCG  
AAACGAACACGGTTAGCGAAGATATGACCCTGTATGCAAAGTGGGAAATCAACGTTTATACTGTTAGTTTTGA  
ATCGAATGGNGGCAGCCAAGTATCGGAAGTAGAAGCCGAGTATGGTTCGTCNATCACAGAGCCAGCT

\*\*\*\*\*  
\*\*\*\*\*  
\*\*\*\*\*

Consensus:

CCACCAGAAAAAGAAGGCCATTCAATTCAAAGGATGGTATCAAGATGAGTTGCTCACAGAAGCGTGGGATTTTCG  
AAACGAACACGGTTAGCGAAGATATGACCCTGTATGCAAAGTGGGAAATCAACGTTTATACTGTTAGTTTTGA  
ATCGAATGGNGGCAGCCAAGTATCGGAAGTAGAAGCCGAGTATGGTTCGTCNATCACAGAGCCAGCT

>Bacillus\_Fam\_796\_210\_1 Nr. of seq. 1 Alignment length(with gaps) = 210  
Alignment score = 0.000000

GCF\_900107275.1\_IMG-  
taxon\_2675903024\_annotated\_assembly\_genomic.fna\_41:390-1233 Satlength=844  
Nr of Repeats=4 RepeatLength=210 seed=GACAAATCCGA Num.seqs=3  
Similarity=0.763693 0  
GACAATCCGAATGCTGNTTACGGTCCAACGACGACAACCTCGGGTGAAGGAATTCAGAAATATTATGGATTAG  
TGGTCAACGGCATTGGTGATGAAGTAACACTTGCTAAAATTGAAGAGATTTTAGCATCNCCGCTCCAAAACGG  
AGGCAGGCATGAAGACGTGATAGCGTTAAAGGAAAACCTTNTCTCGCCTCGGTTTCCATGTATCG

\*\*\*\*\*  
\*\*\*\*\*  
\*\*\*\*\*

Consensus:

GACAATCCGAATGCTGNTTACGGTCCAACGACGACAACCTCGGGTGAAGGAATTCAGAAATATTATGGATTAG  
TGGTCAACGGCATTGGTGATGAAGTAACACTTGCTAAAATTGAAGAGATTTTAGCATCNCCGCTCCAAAACGG  
AGGCAGGCATGAAGACGTGATAGCGTTAAAGGAAAACCTTNTCTCGCCTCGGTTTCCATGTATCG

>Bacillus\_Fam\_797\_208\_1 Nr. of seq. 1 Alignment length(with gaps) = 208  
Alignment score = 0.000000  
GCF\_000334155.1\_L1\_genomic.fna\_10:13608-14440 Satlength=833 Nr of  
Repeats=4 RepeatLength=208 seed=AGGGTGAGAG Num.seqs=4  
Similarity=0.983974  
0

AGGGTGAGAGAGGGAGGAGTTTGGGAGGTAAGAAAACTAAGGCCTCCGCCGATCTGCCGTCTTTGGTAAAGG  
GAATCGGACAGTTTTTTAGGAGTGCTCTTCTTAACGGGATACAGGCAAGGTAGTGACGCTGAAAAACATCCCGA  
TCCGCCCTGTCATAAAGAGCGGTGGAAGCAAGCTTGCTTTTCATGATTAACTTTATGAC

\*\*\*\*\*  
\*\*\*\*\*  
\*\*\*\*\*

Consensus:

AGGGTGAGAGAGGGAGGAGTTTGGGAGGTAAGAAAACTAAGGCCTCCGCCGATCTGCCGTCTTTGGTAAAGG  
GAATCGGACAGTTTTTTAGGAGTGCTCTTCTTAACGGGATACAGGCAAGGTAGTGACGCTGAAAAACATCCCGA  
TCCGCCCTGTCATAAAGAGCGGTGGAAGCAAGCTTGCTTTTCATGATTAACTTTATGAC

>Bacillus\_Fam\_798\_206\_1 Nr. of seq. 1 Alignment length(with gaps) = 206  
Alignment score = 0.000000  
GCF\_001274775.1\_ASM127477v1\_genomic.fna\_6:313004-313829 Satlength=826 Nr  
of Repeats=4 RepeatLength=206 seed=TCGTGCCTGC Num.seqs=3  
Similarity=0.961165 0

TCGTGCCTGCGGGTCTCGGTCATCCCTCTTTTCCGAAGGAGTCCGGGCCCCCTTCGCTTCTTTTCACTCTTGG  
TGATACTTTGATTCCCTTTTTTTCATTATTGTTTCCGCCTAGTTCGTTTTTGGTTCTGCTTCATTGGTGTGAT  
GGATTGGGCGTTCCATCCCGCTGTGGGACCGCTTTTCTTGGGAGGGCGCCCGAGCCTCT

\*\*\*\*\*  
\*\*\*\*\*  
\*\*\*\*\*

Consensus:

TCGTGCCTGCGGGTCTCGGTCATCCCTCTTTTCCGAAGGAGTCCGGGCCCCCTTCGCTTCTTTTCACTCTTGG  
TGATACTTTGATTCCCTTTTTTTCATTATTGTTTCCGCCTAGTTCGTTTTTGGTTCTGCTTCATTGGTGTGAT  
GGATTGGGCGTTCCATCCCGCTGTGGGACCGCTTTTCTTGGGAGGGCGCCCGAGCCTCT

>Bacillus\_Fam\_799\_206\_1 Nr. of seq. 1 Alignment length(with gaps) = 206  
Alignment score = 0.000000  
GCF\_001375535.1\_Bacillus\_niameyensis\_genomic.fna\_6:523574-525781  
Satlength=2208 Nr of Repeats=11 RepeatLength=206 seed=AAAGAAAAGC  
Num.seqs=10 Similarity=0.998706 0  
AAAGAAAAGCGTAAACGCCCCGTTTAGCGACGTACAACTTTAATAATAAGGATGAACGGCTAAAGTCGCGCCG  
TCCTGGCGCAACGCGGTTCTGACCAACGTCGTGTTGGCCCGAGATAAAGGAAACACAGCGAGGGACGAGCTGA  
TGTTGACTTATCGTAGGAAGAAGCTGAAAGTTTGCTAGTCGTGGGCGTTGAAGCTGGAC

\*\*\*\*\*  
\*\*\*\*\*  
\*\*\*\*\*

Consensus:

AAAGAAAAGCGTAAACGCCCCGTTTAGCGACGTACAACTTTAATAATAAGGATGAACGGCTAAAGTCGCGCCG  
TCCTGGCGCAACGCGGTTCTGACCAACGTCGTGTTGGCCCGAGATAAAGGAAACACAGCGAGGGACGAGCTGA  
TGTTGACTTATCGTAGGAAGAAGCTGAAAGTTTGCTAGTCGTGGGCGTTGAAGCTGGAC

>Bacillus\_Fam\_800\_205\_1 Nr. of seq. 1 Alignment length(with gaps) = 205  
Alignment score = 0.000000  
GCF\_001645685.2\_ASM164568v2\_genomic.fna\_1:959082-960714 Satlength=1633 Nr  
of Repeats=8 RepeatLength=204 seed=AAAGTGGAAG Num.seqs=8  
Similarity=0.770301 0  
AAAGTGGAAGATCTGTTACGAATGATAAGTTTCGACACATTGAAAGGAAGTACCGATCAAAGNGCGATTGATG  
AAGCTCAAAAAGCNGTCAATAAACTTCCGGAAGGTCCAGAAAAAATCGNCTTGAANGATTTAGTGAACAAAG  
CACAAGATCTATTAAATAAAAAAAAAACAAGCCGAAAAAGACTTGAACGATGCAAAGAAC

\*\*\*\*\*  
\*\*\*\*\*  
\*\*\*\*\*

Consensus:

AAAGTGGAAGATCTGTTACGAATGATAAGTTTCGACACATTGAAAGGAAGTACCGATCAAAGNGCGATTGATG  
AAGCTCAAAAAGCNGTCAATAAACTTCCGGAAGGTCCAGAAAAAATCGNCTTGAANGATTTAGTGAACAAAG  
CACAAGATCTATTAAATAAAAAAAAAACAAGCCGAAAAAGACTTGAACGATGCAAAGAAC

>Bacillus\_Fam\_801\_196\_1 Nr. of seq. 1 Alignment length(with gaps) = 196  
Alignment score = 0.000000  
GCF\_002019605.1\_ASM201960v1\_genomic.fna\_1:4043384-4044164 Satlength=781  
Nr of Repeats=4 RepeatLength=195 seed=CGAATTAATA Num.seqs=4  
Similarity=0.670875 0  
CGAATTAATACGTGGATTGGACCGAAGTGGATCAAACCAAACAATCCACTAATAGGGGAACCAACTCCGATCT  
CAACGAGGATNCACGATAACAGAAAATACCTATTTGCATAATCAACCGTGGAATAGTGCTAGAGAAGAAATGAAT  
TTTTACGTCCGCAAACAGTGACAGCATTTGAAGAATGGAATGGATGGTAC

\*\*\*\*\*  
\*\*\*\*\*  
\*\*\*\*\*

Consensus:

CGAATTAATACGTGGATTGGACCGAAGTGGATCAAACCAAACAATCCACTAATAGGGGAACCAACTCCGATCT  
CAACGAGGATNCACGATAACAGAAAATACCTATTTGCATAATCAACCGTGGAATAGTGCTAGAGAAGAAATGAAT  
TTTTACGTCCGCAAACAGTGACAGCATTTGAAGAATGGAATGGATGGTAC

>Bacillus\_Fam\_802\_195\_1 Nr. of seq. 1 Alignment length(with gaps) = 195  
Alignment score = 0.000000  
GCF\_001274775.1\_ASM127477v1\_genomic.fna\_6:301298-302231 Satlength=934 Nr  
of Repeats=5 RepeatLength=195 seed=TCCATCACCA Num.seqs=3  
Similarity=0.945299 0  
TCCATCACCAAAAGTGCAATGCAGCGGAGACCGGCCGACTCCTTCGGAATAGAGTGAAGTTCGATACCCCG  
GACGCGCAGCTGAGGAGGCTCGACTCACTCCCCGAGGAAAGCGGACGGCCGACGCGAAATGGAACGGACCTTG  
ACTCCACCAAGATCCTCATCTAAAGCAGAAAGACATCATGCCTACCTCC

\*\*\*\*\*  
\*\*\*\*\*  
\*\*\*\*\*

Consensus:

TCCATCACCAAAAGTGCAATGCAGCGGAGACCGGCCGACTCCTTCGGAATAGAGTGAAGTTCGATACCCCG  
GACGCGCAGCTGAGGAGGCTCGACTCACTCCCCGAGGAAAGCGGACGGCCGACGCGAAATGGAACGGACCTTG  
ACTCCACCAAGATCCTCATCTAAAGCAGAAAGACATCATGCCTACCTCC

>Bacillus\_Fam\_803\_195\_1 Nr. of seq. 1 Alignment length(with gaps) = 195  
Alignment score = 0.000000  
GCF\_002019605.1\_ASM201960v1\_genomic.fna\_1:4034033-4035008 Satlength=976  
Nr of Repeats=5 RepeatLength=195 seed=ATAATCAACC Num.seqs=5  
Similarity=0.628407 0  
ATAATCAACCATTTGCNAATACAAGAAGATCAGAAGTNTTACGTCCNCAAACGGTACAGGCAACAGGAGAATG  
GAATGGCTGGTACCGAATTAATACATGGGTAGGACCAAAGTGGATTAAACCGTCGAATGCGATTGTAGGAGAA  
ATTAAANAAATCTCGCAAANTATAACATTAACGCAAAATACGCATTTGC

\*\*\*\*\*  
\*\*\*\*\*  
\*\*\*\*\*

Consensus:

ATAATCAACCATTTGCNAATACAAGAAGATCAGAAGTNTTACGTCCNCAAACGGTACAGGCAACAGGAGAATG  
GAATGGCTGGTACCGAATTAATACATGGGTAGGACCAAAGTGGATTAAACCGTCGAATGCGATTGTAGGAGAA  
ATTAAANAAATCTCGCAAANTATAACATTAACGCAAAATACGCATTTGC

>Bacillus\_Fam\_804\_194\_1 Nr. of seq. 1 Alignment length(with gaps) = 194  
Alignment score = 0.000000  
GCF\_000292245.2\_ASM29224v2\_genomic.fna\_61:22691-23863 Satlength=1173 Nr  
of Repeats=6 RepeatLength=195 seed=ACGTCGAATA Num.seqs=5  
Similarity=0.575845 0  
ACGTCGAATACACTAAGNCCGTTCCACTCGGATTGAGTTTGCTTATAAACACATCAAANTTCCGTTANAACCTT  
TGATCATATGCTCCNGCGGTCGTTGGGAAATTGNTGATGTTGTATANCCNGTCACATACGCATTTCCATCCT  
CATCGANNGCAATTCCATNTCCTNNATCANNATCACTTCNCCTAAAT

\*\*\*\*\*  
\*\*\*\*\*  
\*\*\*\*\*

Consensus:

ACGTCGAATACACTAAGNCCGTTCCACTCGGATTGAGTTTGCTTATAAACACATCAAANTTCCGTTANAACCTT  
TGATCATATGCTCCNGCGGTCGTTGGGAAATTGNTGATGTTGTATANCCNGTCACATACGCATTTCCATCCT  
CATCGANNGCAATTCCATNTCCTNNATCANNATCACTTCNCCTAAAT

>Bacillus\_Fam\_805\_190\_1 Nr. of seq. 1 Alignment length(with gaps) = 190  
Alignment score = 0.000000  
GCF\_001636425.1\_ASM163642v1\_genomic.fna\_1:2048397-2049156 Satlength=760  
Nr of Repeats=4 RepeatLength=190 seed=TTAAATCAAA Num.seqs=3  
Similarity=0.840023 0  
TTAAATCAAAATTGGGATTGTACATAGANATANGCAGTGTCTAATCATCCTGCTGGGTTGATTTCGGTTGCA  
GGCGCTCGCTTTCCGAGGCCTGCCGGGAGTCTCATCATAGTAAGCTCCTTCGGGGTTTCCATAAAGCCAGCTG  
ATCCCGCAGGAGTCTCGCACCTTCCGCTCCAATCAACCTTTGAA

\*\*\*\*\*  
\*\*\*\*\*  
\*\*\*\*\*  
Consensus:

TTAAATCAAAATTGGGATTGTACATAGANATANGCAGTGTCTAATCATCCTGCTGGGTTGATTTCGGTTGCA  
GGCGCTCGCTTTCCGAGGCCTGCCGGGAGTCTCATCATAGTAAGCTCCTTCGGGGTTTCCATAAAGCCAGCTG  
ATCCCGCAGGAGTCTCGCACCTTCCGCTCCAATCAACCTTTGAA

>Bacillus\_Fam\_806\_177\_1 Nr. of seq. 1 Alignment length(with gaps) = 177  
Alignment score = 0.000000  
GCF\_001636345.1\_ASM163634v1\_genomic.fna\_1:572602-573664 Satlength=1063 Nr  
of Repeats=6 RepeatLength=177 seed=CAGAAACAAC Num.seqs=6  
Similarity=0.773007 0  
CAGAAACAACAAATGCTGAAGTAGTAGCAAAAACAGAAGCCATCCAAAAGCACTAGCAGGCTTAGAATTTGC  
AGGCCAAAACAGCCTTAAATGCAGCAAAAGCAAAAGCTGAGGAAAAGCAAGAAGCCGACTACACATCTGAAAGC  
TATAGCCCATTTAAAGCAGCATTAGAACTGC

\*\*\*\*\*  
\*\*\*\*\*  
\*\*\*\*\*  
Consensus:

CAGAAACAACAAATGCTGAAGTAGTAGCAAAAACAGAAGCCATCCAAAAGCACTAGCAGGCTTAGAATTTGC  
AGGCCAAAACAGCCTTAAATGCAGCAAAAGCAAAAGCTGAGGAAAAGCAAGAAGCCGACTACACATCTGAAAGC  
TATAGCCCATTTAAAGCAGCATTAGAACTGC

>Bacillus\_Fam\_807\_172\_1 Nr. of seq. 1 Alignment length(with gaps) = 172  
Alignment score = 0.000000  
GCF\_000712595.1\_ASM71259v1\_genomic.fna\_6:82276-83300 Satlength=1025 Nr of  
Repeats=6 RepeatLength=172 seed=TTACATATGG Num.seqs=5  
Similarity=0.886364 0  
TTACATATGGCTAGAGTAAAGCTTTGTGCGCTCTTTTACTTCGTCCATCATCGTTTGAATTTTTTGATCGTGT  
AAAGCTTCGTTTTCAGAAAGCTTATCTTTTGAATCGTAATTTTAAAGAAAAAATTTGAAATATCATAATGT  
AATCGCTCCTTTAGGTTGTTTTCGTA

\*\*\*\*\*  
\*\*\*\*\*  
\*\*\*\*\*  
Consensus:

TTACATATGGCTAGAGTAAAGCTTTGTGCGCTCTTTTACTTCGTCCATCATCGTTTGAATTTTTTGATCGTGT

AAAGCTTCGGTTTCAGAAAGCTTATCTTTTTGAATCGTAATTTTAAAAGAAAAAATTTGAAATATCATAATGT  
AATCGCTCCTTTAGGTTGTTTTCGTA

>Bacillus\_Fam\_808\_171\_1 Nr. of seq. 1 Alignment length(with gaps) = 171  
Alignment score = 0.000000

GCF\_001274935.1\_ASM127493v1\_genomic.fna\_19:74009-74687 Satlength=679 Nr  
of Repeats=4 RepeatLength=171 seed=ATGTTGTTCC Num.seqs=3  
Similarity=0.849253

0

ATGTTGTTCCACGATTGAAGTTGCGCTACGGTTACGCCGAATTTCACTGCAATTCCACTAAGTGTATCACCTG  
ATTTAACGGTGTACGTGGATACGGTTGAATCGCCACCACCACTCGTAGGAGCTTTAACTTTCAAAACTTGTCC  
AATCTTAATCACATCAGCGTTTGAG

\*\*\*\*\*  
\*\*\*\*\*  
\*\*\*\*\*

Consensus:

ATGTTGTTCCACGATTGAAGTTGCGCTACGGTTACGCCGAATTTCACTGCAATTCCACTAAGTGTATCACCTG  
ATTTAACGGTGTACGTGGATACGGTTGAATCGCCACCACCACTCGTAGGAGCTTTAACTTTCAAAACTTGTCC  
AATCTTAATCACATCAGCGTTTGAG

>Bacillus\_Fam\_809\_168\_1 Nr. of seq. 1 Alignment length(with gaps) = 168  
Alignment score = 0.000000

GCF\_000504145.1\_SOAPdenovo\_for\_version2.04\_of\_Bacillus\_sp.\_FJAT-  
14515\_genome\_genomic.fna\_1:2021519-2027779 Satlength=6261 Nr of  
Repeats=38 RepeatLength=168 seed=TCTACCAATT Num.seqs=36 Similarity=0.77

0

TCTACCAATTTTAATNCCGAAAGTTCTTCCATCANTTCTTGATGTGTTTGTTTTAATTGTTCAAGTTCTTGGT  
ACTGACTTTGTTCTTTCAANGTAGCINNCCGATAACTGTTGAGTACTTCTTCATATGATTGNTTTAATTTTTC  
TAGTTCTTCGCTTTGGACTTGT

\*\*\*\*\*  
\*\*\*\*\*  
\*\*\*\*\*

Consensus:

TCTACCAATTTTAATNCCGAAAGTTCTTCCATCANTTCTTGATGTGTTTGTTTTAATTGTTCAAGTTCTTGGT  
ACTGACTTTGTTCTTTCAANGTAGCINNCCGATAACTGTTGAGTACTTCTTCATATGATTGNTTTAATTTTTC  
TAGTTCTTCGCTTTGGACTTGT

>Bacillus\_Fam\_810\_164\_1 Nr. of seq. 1 Alignment length(with gaps) = 164  
Alignment score = 0.000000

GCF\_000177235.2\_ASM17723v2\_genomic.fna\_1:4304399-4305217 Satlength=819 Nr  
of Repeats=5 RepeatLength=164 seed=AACAGGGACG Num.seqs=3  
Similarity=0.917172

0

AACAGGGACGGTTCTCACTTGCCAGTTTGATAGTTTTTTTATGATTTGGTCATAGTTATGTGCGATTTCTTTC  
AAGTTACACGCGATTTTGATCGAGTTACGCGCGATTTACACGAGTTTGAAGCGATTTGGAAACCAACTGGAA  
AAACACTTCAATTAGGCT

\*\*\*\*\*  
\*\*\*\*\*  
\*\*\*\*\*

Consensus:



AACAGGGACGGTTCCTCACTTGCCAGTTTGATAGTTTTTTTTATGATTTGGTCATAGTTATGTGCGATTTCTTTC  
AAGTTACACGCGATTTTGATCGAGTTACGCGCGATTTACACGAGTTTGAAGCGATTTGGAAACCAACTGGAA  
AAACACTTCAATTAGGCT

>Bacillus\_Fam\_811\_164\_1 Nr. of seq. 1 Alignment length(with gaps) = 164  
Alignment score = 0.000000  
GCF\_001273755.1\_ASM127375v1\_genomic.fna\_16:30431-31253 Satlength=823 Nr  
of Repeats=5 RepeatLength=164 seed=GGTCACATTC Num.seqs=4  
Similarity=0.967480

0  
GGTCACATTCATGAGGTAAGATTTCAGCTTGTTTCAGTGATTTGATCACCGCACTCGGGACATTGTTTAGGTGG  
TAGGGTTCTAAAGAACTCCAACGGATTTTTAGTTTGCATGATGGTTTCCTCCTTTAAATGGTTTAGTAGTCTT  
CGCGTTTAGAAAGGCAGT

\*\*\*\*\*  
\*\*\*\*\*  
\*\*\*\*\*

Consensus:

GGTCACATTCATGAGGTAAGATTTCAGCTTGTTTCAGTGATTTGATCACCGCACTCGGGACATTGTTTAGGTGG  
TAGGGTTCTAAAGAACTCCAACGGATTTTTAGTTTGCATGATGGTTTCCTCCTTTAAATGGTTTAGTAGTCTT  
CGCGTTTAGAAAGGCAGT

>Bacillus\_Fam\_812\_156\_1 Nr. of seq. 1 Alignment length(with gaps) = 156  
Alignment score = 0.000000  
GCF\_000504145.1\_SOAPdenovo\_for\_version2.04\_of\_Bacillus\_sp.\_FJAT-  
14515\_genome\_genomic.fna\_4:22903-23527 Satlength=625 Nr of Repeats=4  
RepeatLength=156 seed=ATAAAGTGAA Num.seqs=4 Similarity=0.968661 0  
ATAAAGTGAATCTTCCATCAGTGAGGGTTTGCTTCATCCTCCACTGATGGTTAGTTGAACCAATCGGGGTTT  
TACAGGCTGTTTTATCACTACACACTTCTCTCTATTTCTCCAACGAAAATGAAAGAGGGATTATTACAGCCTG  
TTAAACCGGG

\*\*\*\*\*  
\*\*\*\*\*  
\*\*\*\*\*

Consensus:

ATAAAGTGAATCTTCCATCAGTGAGGGTTTGCTTCATCCTCCACTGATGGTTAGTTGAACCAATCGGGGTTT  
TACAGGCTGTTTTATCACTACACACTTCTCTCTATTTCTCCAACGAAAATGAAAGAGGGATTATTACAGCCTG  
TTAAACCGGG

>Bacillus\_Fam\_813\_156\_1 Nr. of seq. 1 Alignment length(with gaps) = 156  
Alignment score = 0.000000  
GCF\_001591585.1\_ASM159158v1\_genomic.fna\_12:122004-122892 Satlength=889 Nr  
of Repeats=6 RepeatLength=156 seed=TTCTTTCTTA Num.seqs=5  
Similarity=0.862420 0

TTCTTTCTTAATAGTATTTTAAAGAATTAACAGAAGAACCAGCTTGCGTGACTACTTCCTTTACATTGAATGC  
TTTTAGAGGATTTTGCTTTTAGTTGTACATCTTTTGATACAGCTTCTTTTTGTAAAGATAATACTTTGTTTCAT  
TTCTCATTC

\*\*\*\*\*  
\*\*\*\*\*  
\*\*\*\*\*

Consensus:

TTCTTTCTTAATAGTATTTTAAAGAATTAACAGAAGAACCAGCTTGCGTGACTACTTCCTTTACATTGAATGC  
TTTGTAGAGGATTTTGCTTTTAGTTGTACATCTTTTGATACAGCTTCTTTTGTAAAGATAATACTTTGTTTCAT  
TTCTCATTC

>Bacillus\_Fam\_814\_156\_1 Nr. of seq. 1 Alignment length(with gaps) = 156  
Alignment score = 0.000000  
GCF\_001887185.1\_ASM188718v1\_genomic.fna\_192:71627-72199 Satlength=573 Nr  
of Repeats=5 RepeatLength=156 seed=ATTTGACTG Num.seqs=3  
Similarity=0.723270 0  
ATTTTGACTGGGGCGGGAACCTAAGGGTGCGGTTGATTACCGAGAAGGAAGAAATTCGGGGGTTTCGGGAAC  
CTAAGGGAGGGTTTGGTTACCGGGATGGAGAAAAATGNCTGTGNTCGGTAACCTAAAGAGTGTGGTTGGTTACC  
CTGGTGGGGA

\*\*\*\*\*  
\*\*\*\*\*  
\*\*\*\*\*

Consensus:

ATTTTGACTGGGGCGGGAACCTAAGGGTGCGGTTGATTACCGAGAAGGAAGAAATTCGGGGGTTTCGGGAAC  
CTAAGGGAGGGTTTGGTTACCGGGATGGAGAAAAATGNCTGTGNTCGGTAACCTAAAGAGTGTGGTTGGTTACC  
CTGGTGGGGA

>Bacillus\_Fam\_815\_156\_1 Nr. of seq. 1 Alignment length(with gaps) = 156  
Alignment score = 0.000000  
GCF\_002019595.1\_ASM201959v1\_genomic.fna\_1:3715909-3716689 Satlength=781  
Nr of Repeats=6 RepeatLength=156 seed=AAAAAGGACT Num.seqs=4  
Similarity=0.764241 0  
AAAAAGGACTGCCTGGCACTGGAGCAAACCCGCCTGAACCATTACCTAAAAAACCGAGACATCATCGGAACC  
AAAGTTCACGACCGCAAGATCCATAATCCCGTCTCCATTAAAAATCTGCAGACGTGATGGAANTTGGACCCAAA  
CCTCCACTAG

\*\*\*\*\*  
\*\*\*\*\*  
\*\*\*\*\*

Consensus:

AAAAAGGACTGCCTGGCACTGGAGCAAACCCGCCTGAACCATTACCTAAAAAACCGAGACATCATCGGAACC  
AAAGTTCACGACCGCAAGATCCATAATCCCGTCTCCATTAAAAATCTGCAGACGTGATGGAANTTGGACCCAAA  
CCTCCACTAG

>Bacillus\_Fam\_816\_155\_1 Nr. of seq. 1 Alignment length(with gaps) = 155  
Alignment score = 0.000000  
GCF\_000299035.1\_ASM29903v1\_genomic.fna\_2:237491-238103 Satlength=613 Nr  
of Repeats=4 RepeatLength=153 seed=CGCTTGCCAT Num.seqs=4  
Similarity=0.618896 0  
CGCTTGCCATTCGGACCACCACGTTTCTCCCAAATAGCAGCATAACGATCCTGACCATTACTACCGTAACCA  
CTTACNTGCATATCAACCGATAGCCTTGCGCAACCAGTTCATTGAACGTCCGCTGATATTGCTCTGCTGTCAA  
ACCATGTCG

\*\*\*\*\*

\*\*\*\*\*  
\*\*\*\*\*

Consensus:

CGCTTGCCATTCCGGACCACCACGTTTCTCCCAAATAGCAGCATAACGATCCTGACCATTACTACCGTAACCA  
CTTACNTGCATATCAACCGATAGCCTTGCGCAACCAGTTCATTGAACGTCGCTGATATTGCTCTGCTGTCAA  
ACCATGTCTG

>Bacillus\_Fam\_817\_155\_1 Nr. of seq. 1 Alignment length(with gaps) = 155  
Alignment score = 0.000000  
GCF\_000331575.1\_ASM33157v1\_genomic.fna\_1:755995-757235 Satlength=1241 Nr  
of Repeats=8 RepeatLength=155 seed=TGCTCTACCG Num.seqs=8  
Similarity=0.986645 0  
TGCTCTACCGACTGAGCTATCGAGCCATAATAATATTTAACTTACAACCTTTATACTCCACTTGCAAAACGTCC  
TCTGTCCCTTCCTCTTCTAGCTTATTCTTTGATGCTTATGCGTCGGGACAACCTCGCAGCTGATTCGCTGATGT  
GGTGCTCGT

\*\*\*\*\*  
\*\*\*\*\*  
\*\*\*\*\*

Consensus:

TGCTCTACCGACTGAGCTATCGAGCCATAATAATATTTAACTTACAACCTTTATACTCCACTTGCAAAACGTCC  
TCTGTCCCTTCCTCTTCTAGCTTATTCTTTGATGCTTATGCGTCGGGACAACCTCGCAGCTGATTCGCTGATGT  
GGTGCTCGT

>Bacillus\_Fam\_818\_155\_1 Nr. of seq. 1 Alignment length(with gaps) = 155  
Alignment score = 0.000000  
GCF\_900156865.1\_PRJEB18960\_genomic.fna\_3:4026577-4027197 Satlength=621 Nr  
of Repeats=4 RepeatLength=155 seed=TTTGTGTAA Num.seqs=4  
Similarity=0.853763 0  
TTTGTGTAAACAAAAGCAGAAAAAACCATGCACAAATCCAGAATGCGCATGCATTTCAATTAATAGCTGAAGC  
AAAGCCATGTGTAATATCCAGGACATGGAAGAAAAACCCATAAAGTCAGTTATAACAGTAAAAAAGTTCCACA  
CCCGCATGA

\*\*\*\*\*  
\*\*\*\*\*  
\*\*\*\*\*

Consensus:

TTTGTGTAAACAAAAGCAGAAAAAACCATGCACAAATCCAGAATGCGCATGCATTTCAATTAATAGCTGAAGC  
AAAGCCATGTGTAATATCCAGGACATGGAAGAAAAACCCATAAAGTCAGTTATAACAGTAAAAAAGTTCCACA  
CCCGCATGA

>Bacillus\_Fam\_819\_154\_1 Nr. of seq. 1 Alignment length(with gaps) = 154  
Alignment score = 0.000000  
GCF\_900098925.1\_PRJEB15625\_genomic.fna\_18:275436-276206 Satlength=771 Nr  
of Repeats=5 RepeatLength=154 seed=GGTTCTCCTA Num.seqs=5  
Similarity=0.977489 0  
GGTTCTCTATATCTCGCTCGGCATCAGTCCAGGTCATACGGCGATGAACAGGACCCTTTTCGCTTTTTCGTTTT  
TGTCCAGCAGCAGGGCCCTATCGCCTAGTGTCCTTCCCTTACCTCGGGTCGATAAGTCGAAAACGAAAGGAGA  
GCCCTTTC

\*\*\*\*\*

\*\*\*\*\*  
\*\*\*\*\*

Consensus:

GGTTCCTCTATATCTCGCTCGGCATCAGTCCAGGTCATACGGCGATGAACAGGACCCTTTCGCTTTTCGTTTT  
TGTCCAGCAGCAGGGCCCTATCGCCTAGTGTCTTCCCTTACCTCGGGTCGATAAGTCGAAAACGAAAGGAGA  
GCCCTTTC

>Bacillus\_Fam\_820\_153\_1 Nr. of seq. 1 Alignment length(with gaps) = 153  
Alignment score = 0.000000  
GCF\_900156865.1\_PRJEB18960\_genomic.fna\_3:4446177-4446943 Satlength=767 Nr  
of Repeats=5 RepeatLength=153 seed=CTAGAAACT Num.seqs=4  
Similarity=0.816198 0  
CTAGAAACTCGTAAAACCCATGCGAATCTCACGGTTTCACATGGTTTTATCAAAAGATCTCAAGAAAAGCAT  
GTGGAAGTGGAAAAGTTCTCAAATATTGACCGTTTTAGAGCTAGAATTTCAAACATATGGATGTTGCGCATG  
CCATTTTC

\*\*\*\*\*  
\*\*\*\*\*  
\*\*\*\*\*

Consensus:

CTAGAAACTCGTAAAACCCATGCGAATCTCACGGTTTCACATGGTTTTATCAAAAGATCTCAAGAAAAGCAT  
GTGGAAGTGGAAAAGTTCTCAAATATTGACCGTTTTAGAGCTAGAATTTCAAACATATGGATGTTGCGCATG  
CCATTTTC

>Bacillus\_Fam\_821\_150\_1 Nr. of seq. 1 Alignment length(with gaps) = 150  
Alignment score = 0.000000  
GCF\_000238675.1\_Baci\_smit\_7\_3\_47FAA\_V1\_genomic.fna\_8:63370-64378  
Satlength=1009 Nr of Repeats=5 RepeatLength=150 seed=TTCCGGCAAT  
Num.seqs=3 Similarity=0.845926  
0  
TTCCGGCAATGAATTTTTAATGTGCTTCAAACCTCGATCGTCCACAAACACATCCGGAGTGGACAACGAAGTC  
GAAAACAATGAGTTATAAGAATCTCCTCTCATCGGTTCAAAAATTTCTTTTGTACCGGGTTAGGAAGCACAT  
AGTT

\*\*\*\*\*  
\*\*\*\*\*  
\*\*\*\*

Consensus:

TTCCGGCAATGAATTTTTAATGTGCTTCAAACCTCGATCGTCCACAAACACATCCGGAGTGGACAACGAAGTC  
GAAAACAATGAGTTATAAGAATCTCCTCTCATCGGTTCAAAAATTTCTTTTGTACCGGGTTAGGAAGCACAT  
AGTT

>Bacillus\_Fam\_822\_150\_1 Nr. of seq. 1 Alignment length(with gaps) = 150  
Alignment score = 0.000000  
GCF\_000712615.1\_ASM71261v1\_genomic.fna\_42:22825-23572 Satlength=748 Nr of  
Repeats=5 RepeatLength=150 seed=TATGGTGGAT Num.seqs=4  
Similarity=0.920000  
0  
TATGGTGGATTGGAGCAAACGGCTCAGTGCAAGGGGCTTATTGGTATGAAGGAATGGCACGACGAGAGAGTTA  
TGAATTAGCACCAGCGGGAAGCGCTTCTACCAATGGAGGTATTGCAGCGGTGTCGAGAAGGCCAAACACTTTC  
GAAC

\*\*\*\*\*  
\*\*\*\*\*  
\*\*\*\*

Consensus:

TATGGTGGATTGGAGCAAACGGCTCAGTGCAAGGGGCTTATTGGTATGAAGGAATGGCAGCAGAGAGAGTTA  
TGAATTAGCACCAGCGGGAAGCGCTTCTACCAATGGAGGTATTGCAGCGGTGTCGAGAAGGCCAAACACTTTC  
GAAC

>Bacillus\_Fam\_823\_150\_1 Nr. of seq. 1 Alignment length(with gaps) = 150  
Alignment score = 0.000000

GCF\_000712615.1\_ASM71261v1\_genomic.fna\_110:463-1366 Satlength=904 Nr of  
Repeats=6 RepeatLength=150 seed=ACTACCCACA Num.seqs=5  
Similarity=0.584458

0

ACTACCCACATAACGTTTACACGTCCNTGNTTATCTACGAAAAACAAATCAAGTTGCTCATCGGTTTGACGTG  
CAGTTGCTNNNACCGNATCCAATGGAACGTAGTTNGGTGCAGTNAGAGGAATTGGTCCTTGCCAATTTCCGGT  
TCCG

\*\*\*\*\*  
\*\*\*\*\*  
\*\*\*\*

Consensus:

ACTACCCACATAACGTTTACACGTCCNTGNTTATCTACGAAAAACAAATCAAGTTGCTCATCGGTTTGACGTG  
CAGTTGCTNNNACCGNATCCAATGGAACGTAGTTNGGTGCAGTNAGAGGAATTGGTCCTTGCCAATTTCCGGT  
TCCG

>Bacillus\_Fam\_824\_148\_1 Nr. of seq. 1 Alignment length(with gaps) = 148  
Alignment score = 0.000000

GCF\_000161455.1\_ASM16145v1\_genomic.fna\_1:395331-396141 Satlength=811 Nr  
of Repeats=4 RepeatLength=148 seed=GAACTTTAA Num.seqs=3  
Similarity=0.892593

0

GAACTTTAAAGCAGTAATGTAAGTTCATTATTCCGCAATTATTTATAAAAATTATCATACTTAATACGAA  
AAAAGAGGAGGAAATCATATGGCAATCGCAATGGCAGTTTAAAAATTTGTAGGTGGAGCACTTCCATTAGTAC  
AA

\*\*\*\*\*  
\*\*\*\*\*  
\*\*

Consensus:

GAACTTTAAAGCAGTAATGTAAGTTCATTATTCCGCAATTATTTATAAAAATTATCATACTTAATACGAA  
AAAAGAGGAGGAAATCATATGGCAATCGCAATGGCAGTTTAAAAATTTGTAGGTGGAGCACTTCCATTAGTAC  
AA

>Bacillus\_Fam\_825\_147\_1 Nr. of seq. 1 Alignment length(with gaps) = 147  
Alignment score = 0.000000

GCF\_000430765.1\_ASM43076v1\_genomic.fna\_6:140808-141395 Satlength=588 Nr  
of Repeats=4 RepeatLength=147 seed=TTTTCTTTG Num.seqs=3  
Similarity=0.877628

0

TTTTTCTTTGGTGGCTGCATCAAGATTTGCGAACATGCCGTGGCGTTCACCCTTTTCCGGAAGTGTTACACCA  
AGCTTTTTCAGCTGGTCCTGTGCCTGGGTCTGTGTCTAGGGTGCCGGCCTTCAGCTTTTCCATAATCGCCCCGCG  
C

\*\*\*\*\*  
\*\*\*\*\*  
\*

Consensus:

TTTTTCTTTGGTGGCTGCATCAAGATTTGCGAACATGCCGTGGCGTTCACCCTTTTCCGGAAGTGTTACACCA  
AGCTTTTTCAGCTGGTCCTGTGCCTGGGTCTGTGTCTAGGGTGCCGGCCTTCAGCTTTTCCATAATCGCCCCGCG  
C

>Bacillus\_Fam\_826\_144\_1 Nr. of seq. 1 Alignment length(with gaps) = 144  
Alignment score = 0.000000  
GCF\_000712595.1\_ASM71259v1\_genomic.fna\_14:117958-118822 Satlength=865 Nr  
of Repeats=6 RepeatLength=144 seed=ATGAAATTAC Num.seqs=6  
Similarity=0.946296 0  
ATGAAATTACCGAGCTGACTAATCTCGATCCCTCAATGGAAGATACCAATTTGGATGAAGTGGCGTCTGTAAA  
GGAAATCACTAATTCCATCGAGATTATTTCTACAAATGAAGATATCGAGACGATCGAAGGTGTCACTTCAC

\*\*\*\*\*  
\*\*\*\*\*

Consensus:

ATGAAATTACCGAGCTGACTAATCTCGATCCCTCAATGGAAGATACCAATTTGGATGAAGTGGCGTCTGTAAA  
GGAAATCACTAATTCCATCGAGATTATTTCTACAAATGAAGATATCGAGACGATCGAAGGTGTCACTTCAC

>Bacillus\_Fam\_827\_143\_1 Nr. of seq. 1 Alignment length(with gaps) = 143  
Alignment score = 0.000000  
GCF\_000177235.2\_ASM17723v2\_genomic.fna\_1:919080-919888 Satlength=809 Nr  
of Repeats=4 RepeatLength=143 seed=ACTTTTTCAG Num.seqs=3  
Similarity=0.962704 0  
ACTTTTTCAGTGCCCTTTTATTTGTATTGCAATGGCTACGTTTCGTTGCGCGCCTGATAGGATAAACCCACTCC  
TATCAGGCTTTTAAACGATTGCAACGACTACGCACATTGCTTAGGGGCACTTCAAAAGTGAAAGAACACC

\*\*\*\*\*  
\*\*\*\*\*

Consensus:

ACTTTTTCAGTGCCCTTTTATTTGTATTGCAATGGCTACGTTTCGTTGCGCGCCTGATAGGATAAACCCACTCC  
TATCAGGCTTTTAAACGATTGCAACGACTACGCACATTGCTTAGGGGCACTTCAAAAGTGAAAGAACACC

>Bacillus\_Fam\_828\_139\_1 Nr. of seq. 1 Alignment length(with gaps) = 139  
Alignment score = 0.000000  
GCF\_000334155.1\_L1\_genomic.fna\_81:1145-1840 Satlength=696 Nr of Repeats=5  
RepeatLength=139 seed=TTTTGTGGAA Num.seqs=5 Similarity=0.984652 0  
TTTTGTGGAAAAGGGGACGGAGCTTACAGGATGATAAAGCAGGAAGCCTATCGCTCACACCCCTTCATTGAAA  
GGTTACTCAGCGTTACTGGACGTACTCATTTTCATCCAGTGGAAGAGCGAGCCACTTATGCTAA

\*\*\*\*\*  
\*\*\*\*\*

Consensus :

TTTTGTGGAAAAGGGGACGGAGCTTACAGGATGATAAAGCAGGAAGCCTATCGCTCACACCCCTTCATTGAAA  
GGTTACTCAGCGTTACTGGACGTACTCATTTTCATCCAGTGGAAGAGCGAGCCACTTATGCTAA

>Bacillus\_Fam\_829\_135\_1 Nr. of seq. 1 Alignment length(with gaps) = 135  
Alignment score = 0.000000  
GCF\_000712615.1\_ASM71261v1\_genomic.fna\_82:4706-5375 Satlength=670 Nr of  
Repeats=5 RepeatLength=135 seed=GACGGTTCCC Num.seqs=3  
Similarity=0.802469

0  
GACGGTTCCCGTGCCCTACACAGCAAATGTTAACAATGACACGGTTTCCGTGATCGGCACGGCCACGAATACTG  
TCTTGACCACCATTTCGCTCGCTCCCGCAGGAAACGGTCCTNNTGCTATTGCCATCACGCCG

\*\*\*\*\*  
\*\*\*\*\*

Consensus :

GACGGTTCCCGTGCCCTACACAGCAAATGTTAACAATGACACGGTTTCCGTGATCGGCACGGCCACGAATACTG  
TCTTGACCACCATTTCGCTCGCTCCCGCAGGAAACGGTCCTNNTGCTATTGCCATCACGCCG

>Bacillus\_Fam\_830\_132\_1 Nr. of seq. 1 Alignment length(with gaps) = 132  
Alignment score = 0.000000  
GCF\_000225265.1\_ASM22526v1\_genomic.fna\_2:43307-43811 Satlength=505 Nr of  
Repeats=4 RepeatLength=126 seed=CATCAATGAC Num.seqs=4  
Similarity=0.431287

0  
CATCAATGACAGAAACNGTATCACTATTTTCNTCATTAGCTACATAAATACGATTATTAGAGGGATTAACACC  
TACATCAGAAGGCTGANTCTCCGACAGGTACTATTCCAATAACAGCATTTGTNNACCTG

\*\*\*\*\*  
\*\*\*\*\*

Consensus :

CATCAATGACAGAAACNGTATCACTATTTTCNTCATTAGCTACATAAATACGATTATTAGAGGGATTAACACC  
TACATCAGAAGGCTGANTCTCCGACAGGTACTATTCCAATAACAGCATTTGTNNACCTG

>Bacillus\_Fam\_831\_132\_1 Nr. of seq. 1 Alignment length(with gaps) = 132  
Alignment score = 0.000000  
GCF\_001590785.1\_ASM159078v1\_genomic.fna\_20:27981-28774 Satlength=794 Nr  
of Repeats=5 RepeatLength=132 seed=TTTTCTTCCC Num.seqs=3  
Similarity=0.673300

0  
TTTTCTTCCCAGAACAATTGAATTTGCTCCAATGCTCCAGAAATAATCTCACTTATAAATGCCATTGCCTCTG  
AAATAATGGTCCCTACAACCTCCATCGTACTAGTCAATATTTCCATTATCCATGTGCCG

\*\*\*\*\*  
\*\*\*\*\*

Consensus :

TTTTCTTCCCAGAACAATTGAATTTGCTCCAATGCTCCAGAAATAATCTCACTTATAAATGCCATTGCCTCTG  
AAATAATGGTCCCTACAACCTCCATCGTACTAGTCAATATTTCCATTATCCATGTGCCG

>Bacillus\_Fam\_832\_132\_1 Nr. of seq. 1 Alignment length(with gaps) = 132  
Alignment score = 0.000000  
GCF\_002019605.1\_ASM201960v1\_genomic.fna\_1:1113610-1114144 Satlength=535  
Nr of Repeats=4 RepeatLength=132 seed=TCGCGGGGTG Num.seqs=3  
Similarity=0.993266 0  
TCGCGGGGTGGAGCATGGAGCAAAGCTTCTTGATTTTACATCGACATGTCGTGACGCATCAAGCTACAAAGCG  
TTACGAGAAGAGGAAACGATGACCTCTTAGAAAAAACATCATCTGTAAGCTATATAACG

\*\*\*\*\*  
\*\*\*\*\*

Consensus:

TCGCGGGGTGGAGCATGGAGCAAAGCTTCTTGATTTTACATCGACATGTCGTGACGCATCAAGCTACAAAGCG  
TTACGAGAAGAGGAAACGATGACCTCTTAGAAAAAACATCATCTGTAAGCTATATAACG

>Bacillus\_Fam\_833\_131\_1 Nr. of seq. 1 Alignment length(with gaps) = 131  
Alignment score = 0.000000  
GCF\_001590785.1\_ASM159078v1\_genomic.fna\_4:31738-32230 Satlength=493 Nr of  
Repeats=4 RepeatLength=123 seed=CATTAAACCA Num.seqs=4  
Similarity=0.312261  
0

CATTAAACCATNNACTTAAGANTAGCCCATTTGTTCCATNACCTAATCCTTTACAGCATCCACCCATCTGAAA  
GCCAGTCCNANNGTTGTCAAATNTCAACATCTTCCTATAATGGCTCCCATACAGTTT

\*\*\*\*\*  
\*\*\*\*\*

Consensus:

CATTAAACCATNNACTTAAGANTAGCCCATTTGTTCCATNACCTAATCCTTTACAGCATCCACCCATCTGAAA  
GCCAGTCCNANNGTTGTCAAATNTCAACATCTTCCTATAATGGCTCCCATACAGTTT

>Bacillus\_Fam\_834\_129\_1 Nr. of seq. 1 Alignment length(with gaps) = 129  
Alignment score = 0.000000  
GCF\_900107275.1\_IMG-  
taxon\_2675903024\_annotated\_assembly\_genomic.fna\_35:27208-27724  
Satlength=517 Nr of Repeats=4 RepeatLength=129 seed=TTTTGAACA  
Num.seqs=4 Similarity=0.613946 0  
TTTTTGAACAATCACGAAACGATGAGCGAACAGCCGCAACGCTTTTAAGCCAGTCATGAACGCATTTGTCATG  
ATTGGCGAGCGGGGAGGAAGCCATCGTCCTACAAATAAAAAAGGGCGCTTTTCCC

\*\*\*\*\*  
\*\*\*\*\*

Consensus:

TTTTTGAACAATCACGAAACGATGAGCGAACAGCCGCAACGCTTTTAAGCCAGTCATGAACGCATTTGTCATG  
ATTGGCGAGCGGGGAGGAAGCCATCGTCCTACAAATAAAAAAGGGCGCTTTTCCC

>Bacillus\_Fam\_835\_128\_1 Nr. of seq. 1 Alignment length(with gaps) = 128  
Alignment score = 0.000000  
GCF\_000615945.1\_ASM61594v1\_genomic.fna\_82:23663-24293 Satlength=631 Nr of  
Repeats=4 RepeatLength=126 seed=TGGTTTACAG Num.seqs=3  
Similarity=0.464869  
0



TGGTTTACAGAAATACAGGTAACAAAATAGGAAGAATNNCAACGGANGGTGAAATTACAGAATATNATATNC  
CTACNNCAGATGCAGGTGCNTATNGATTATAGCNNNAGGTNCTGATGGTGCAC TN

\*\*\*\*\*  
\*\*\*\*\*

Consensus :

TGGTTTACAGAAATACAGGTAACAAAATAGGAAGAATNNCAACGGANGGTGAAATTACAGAATATNATATNC  
CTACNNCAGATGCAGGTGCNTATNGATTATAGCNNNAGGTNCTGATGGTGCAC TN

>Bacillus\_Fam\_836\_127\_1 Nr. of seq. 1 Alignment length(with gaps) = 127  
Alignment score = 0.000000

GCF\_000025825.1\_ASM2582v1\_genomic.fna\_7:28124-28628 Satlength=505 Nr of  
Repeats=4 RepeatLength=126 seed=TTTCTGTAA T Num.seqs=4  
Similarity=0.602865

0

TTTCTGTAA TTGATGGGTTAACAAATACTGTAATTGCCACGATTCCAGTAGGAACTCAACCGACCGGTATAG  
AGATCAATCCATACATCAATCGAATTTATATAACAAATAGAGGTAGTAATACAG

\*\*\*\*\*  
\*\*\*\*\*

Consensus :

TTTCTGTAA TTGATGGGTTAACAAATACTGTAATTGCCACGATTCCAGTAGGAACTCAACCGACCGGTATAG  
AGATCAATCCATACATCAATCGAATTTATATAACAAATAGAGGTAGTAATACAG

>Bacillus\_Fam\_837\_127\_1 Nr. of seq. 1 Alignment length(with gaps) = 127  
Alignment score = 0.000000

GCF\_900107275.1\_IMG-

taxon\_2675903024\_annotated\_assembly\_genomic.fna\_38:105111-105565

Satlength=455 Nr of Repeats=4 RepeatLength=127 seed=CGTCGTTTTT

Num.seqs=3 Similarity=0.979003 0

CGTCGTTTTTCCAAAAGGGAAATGCGCCCTTTTATTTTAGTTTACGATGGCTCGCTTTTGTGCGACGTCGGTT  
ATGACAAATGCGCTCATAACCTACTTAAAAAACGCGACAGCTCCCTCATCGTAC

\*\*\*\*\*  
\*\*\*\*\*

Consensus :

CGTCGTTTTTCCAAAAGGGAAATGCGCCCTTTTATTTTAGTTTACGATGGCTCGCTTTTGTGCGACGTCGGTT  
ATGACAAATGCGCTCATAACCTACTTAAAAAACGCGACAGCTCCCTCATCGTAC

>Bacillus\_Fam\_838\_126\_1 Nr. of seq. 1 Alignment length(with gaps) = 126  
Alignment score = 0.000000

GCF\_001636345.1\_ASM163634v1\_genomic.fna\_1:2067064-2067694 Satlength=631

Nr of Repeats=5 RepeatLength=126 seed=GATGTTGAAG Num.seqs=5

Similarity=0.789418 0

GATGTTGAAGCATTAACAACAGAAAAAGAAGCTGTATCTTCTTCATNCTGAAGGAAAAGAAACACACGATT  
CAGTAAGCAAGGAAGAGAAAGCATCATCTCTAGTTGATGTAAGCGGACTTA

\*\*\*\*\*  
\*\*\*\*\*

Consensus :

GATGTTGAAGCATTAACAACAGAAAAAGAAGCTGTATCTTCTTCATNCTGAAGGAAAAGAAACACACGATT  
CAGTAAGCAAGGAAGAGAAAGCATCATCTCTAGTTGATGTAAAAGCGGACTTA

>Bacillus\_Fam\_839\_125\_1 Nr. of seq. 1 Alignment length(with gaps) = 125  
Alignment score = 0.000000  
GCF\_001636425.1\_ASM163642v1\_genomic.fna\_1:4638716-4643591 Satlength=4876  
Nr of Repeats=39 RepeatLength=125 seed=AGCGCCCTCC Num.seqs=39  
Similarity=0.991795 0  
AGCGCCCTCCGCATTTTCCTTGTCCAGCTTCGGGCGCTATCGGCTCGAGGGCAAATGCCCAGATGCCCCAAGAGG  
TGGAAGAGCGATCTTCCGTGTCATCTGGGCTTTGGCTGGTCGCCGATGGGCC

\*\*\*\*\*  
\*\*\*\*\*  
Consensus:

AGCGCCCTCCGCATTTTCCTTGTCCAGCTTCGGGCGCTATCGGCTCGAGGGCAAATGCCCAGATGCCCCAAGAGG  
TGGAAGAGCGATCTTCCGTGTCATCTGGGCTTTGGCTGGTCGCCGATGGGCC

>Bacillus\_Fam\_840\_124\_1 Nr. of seq. 1 Alignment length(with gaps) = 124  
Alignment score = 0.000000  
GCF\_000429725.1\_ASM42972v1\_genomic.fna\_10:14934-15732 Satlength=799 Nr of  
Repeats=5 RepeatLength=124 seed=GAACGTCCGA Num.seqs=3  
Similarity=0.956989  
0  
GAACGTCCGAGCCGGCCGGCGGAGTGTCCGCCCAGCGCCGGAGTGACCGCTTTGCTCTTCGATGTGACCGCTC  
ACCTCCTCCGAAGCGCCGTCCGCGGCCGCCTTCCGACCGCTTTTCCCGGCC

\*\*\*\*\*  
\*\*\*\*\*  
Consensus:

GAACGTCCGAGCCGGCCGGCGGAGTGTCCGCCCAGCGCCGGAGTGACCGCTTTGCTCTTCGATGTGACCGCTC  
ACCTCCTCCGAAGCGCCGTCCGCGGCCGCCTTCCGACCGCTTTTCCCGGCC

>Bacillus\_Fam\_841\_124\_1 Nr. of seq. 1 Alignment length(with gaps) = 124  
Alignment score = 0.000000  
GCF\_000986785.1\_ASM98678v1\_genomic.fna\_48:14425-15293 Satlength=869 Nr of  
Repeats=7 RepeatLength=124 seed=GGAAGCGCCT Num.seqs=7  
Similarity=0.996928  
0  
GGAAGCGCCTTGGTCAGACCCGACCAGCATAAGTCGCTCCAGGATAGAAGGCGTCCTTTGCCTTCAATCCTGG  
AGTGGCTTATGACTCGAGGGTCTAGGCGCTGGAGCTGGACAATCGAAAAGC

\*\*\*\*\*  
\*\*\*\*\*  
Consensus:

GGAAGCGCCTTGGTCAGACCCGACCAGCATAAGTCGCTCCAGGATAGAAGGCGTCCTTTGCCTTCAATCCTGG  
AGTGGCTTATGACTCGAGGGTCTAGGCGCTGGAGCTGGACAATCGAAAAGC

>Bacillus\_Fam\_842\_123\_1 Nr. of seq. 1 Alignment length(with gaps) = 123  
Alignment score = 0.000000

GCF\_000986785.1\_ASM98678v1\_genomic.fna\_50:5702-6836 Satlength=1135 Nr of Repeats=9 RepeatLength=123 seed=GCTTCCGCTT Num.seqs=8  
Similarity=0.997290  
0  
GCTTCCGCTTTTCTTATTGTCCAGCTGCAGCGGCTAGCCCCCTCGAGACACTTCGGTCCATCACCTGAAGGCAA  
AGAACGCCTTCAACTGCTGGCCCTCCAGTGCTTTTCGGGGCTGGACAGCC

\*\*\*\*\*  
\*\*\*\*\*

Consensus:

GCTTCCGCTTTTCTTATTGTCCAGCTGCAGCGGCTAGCCCCCTCGAGACACTTCGGTCCATCACCTGAAGGCAA  
AGAACGCCTTCAACTGCTGGCCCTCCAGTGCTTTTCGGGGCTGGACAGCC

>Bacillus\_Fam\_843\_122\_1 Nr. of seq. 1 Alignment length(with gaps) = 122  
Alignment score = 0.000000

GCF\_000708755.2\_ASM70875v2\_genomic.fna\_2:743902-744385 Satlength=484 Nr of Repeats=4 RepeatLength=122 seed=CGAAAAGCGG Num.seqs=3  
Similarity=0.729391  
0

CGAAAAGCGGAAGCGCTCGTTTAGCTCCGGGAGTCAGATAAGGAAGTGGCGGAAAAGGCGCTTTTTGCCTTTN  
CNGACAATTCGGTTCTGACAGAGGAGCTGAGCGCTGGAGCTAGACAATG

\*\*\*\*\*  
\*\*\*\*\*

Consensus:

CGAAAAGCGGAAGCGCTCGTTTAGCTCCGGGAGTCAGATAAGGAAGTGGCGGAAAAGGCGCTTTTTGCCTTTN  
CNGACAATTCGGTTCTGACAGAGGAGCTGAGCGCTGGAGCTAGACAATG

>Bacillus\_Fam\_844\_122\_1 Nr. of seq. 1 Alignment length(with gaps) = 122  
Alignment score = 0.000000

GCF\_000709935.2\_ASM70993v2\_genomic.fna\_5:41241-41730 Satlength=490 Nr of Repeats=4 RepeatLength=122 seed=CGAAAAGCGG Num.seqs=3  
Similarity=0.704000  
0

CGAAAAGCGGAGCCGACTGTTCAGTCCTNTCAGTCAGATAAGAAATCACCGGAAAAGTCCGGTTTTGACTTTT  
TCGGGGATTTTGTTCAGACAAGGACTAGGAGGCGGAGCTGGACAATG

\*\*\*\*\*  
\*\*\*\*\*

Consensus:

CGAAAAGCGGAGCCGACTGTTCAGTCCTNTCAGTCAGATAAGAAATCACCGGAAAAGTCCGGTTTTGACTTTT  
TCGGGGATTTTGTTCAGACAAGGACTAGGAGGCGGAGCTGGACAATG

>Bacillus\_Fam\_845\_122\_1 Nr. of seq. 1 Alignment length(with gaps) = 122  
Alignment score = 0.000000

GCF\_001636425.1\_ASM163642v1\_genomic.fna\_1:3988479-3988970 Satlength=492  
Nr of Repeats=4 RepeatLength=122 seed=GCATCATTTCT Num.seqs=3  
Similarity=0.775986  
0

GCATCATTTCTTTGTTTCCATTGGTTGTTGTTTCATAAAAGCAACATCTCCTTTGGGTCATGAGAATGGTTTAT  
ACTTATTAGNTTACAGGTATTCATNTTTAGTCGCCGGGACTAAAAACN

\*\*\*\*\*  
\*\*\*\*\*

Consensus:

GCATCATCTCTTGTTCATTGGTTGTTGTTTCATAAAAGCAACATCTCCTTTGGGTCATGAGAATGGTTTAT  
ACTTATTAGNTTACAGGTATTCCATNTTTAGTCGCCGGGACTAAAAACN

>Bacillus\_Fam\_846\_121\_1 Nr. of seq. 1 Alignment length(with gaps) = 121  
Alignment score = 0.000000

GCF\_000181495.1\_ASM18149v1\_genomic.fna\_142:19481-19965 Satlength=485 Nr  
of Repeats=4 RepeatLength=121 seed=GAAATTCGCC Num.seqs=4  
Similarity=0.970615

0

GAAATTCGCCGCAATCTCTCCTCCCCTGACGAACGAGAAGCAAGAAGTTCAAGGAGATGAGAGAGAGAGGACC  
GGAGCGTATCTATAATACGTGAGGATCCGAGCGAGCGAAATCGACGCA

\*\*\*\*\*  
\*\*\*\*\*

Consensus:

GAAATTCGCCGCAATCTCTCCTCCCCTGACGAACGAGAAGCAAGAAGTTCAAGGAGATGAGAGAGAGAGGACC  
GGAGCGTATCTATAATACGTGAGGATCCGAGCGAGCGAAATCGACGCA

>Bacillus\_Fam\_847\_120\_1 Nr. of seq. 1 Alignment length(with gaps) = 120  
Alignment score = 0.000000

GCF\_000161455.1\_ASM16145v1\_genomic.fna\_1:886062-886479 Satlength=418 Nr  
of Repeats=4 RepeatLength=120 seed=TGGTATTACT Num.seqs=3  
Similarity=0.861566

0

TGGTATTACTTTGAGAGTAATGGCGTAATGAAAACAGATTGGTATTTTGATGGAACGAATTGGTTTTATATGA  
ATAGCAATGGTGGAATGGAGACAGGATGGAAAAAGATTCAAGGAACG

\*\*\*\*\*  
\*\*\*\*\*

Consensus:

TGGTATTACTTTGAGAGTAATGGCGTAATGAAAACAGATTGGTATTTTGATGGAACGAATTGGTTTTATATGA  
ATAGCAATGGTGGAATGGAGACAGGATGGAAAAAGATTCAAGGAACG

>Bacillus\_Fam\_848\_120\_1 Nr. of seq. 1 Alignment length(with gaps) = 120  
Alignment score = 0.000000

GCF\_000169195.2\_ASM16919v2\_genomic.fna\_1:2868366-2869215 Satlength=850 Nr  
of Repeats=4 RepeatLength=120 seed=GAAGAAATCG Num.seqs=3  
Similarity=0.595556

0

GAAGAAATCGATGTGATTCTTTCCANGAAACCGACAATGCCGGGCAACGCGAAAAGCTGCCATCAGATGCGG  
AAAATGAAACAGTTGGCGGTGCGANAGGTGAAGACACAGACGAACCG

\*\*\*\*\*  
\*\*\*\*\*

Consensus:

GAAGAAATCGATGTGATTCTTTCCANGAAACCGACAATGCCGGGCAACGCGAAAAGCTGCCATCAGATGCGG  
AAAATGAAACAGTTGGCGGTGCGANAGGTGAAGACACAGACGAACCG

>Bacillus\_Fam\_849\_118\_1 Nr. of seq. 1 Alignment length(with gaps) = 118  
Alignment score = 0.000000  
Bacillus\_murimartini\_genomic.fna\_9:918630-919220 Satlength=591 Nr of  
Repeats=5 RepeatLength=118 seed=GCTTATAAGA Num.seqs=5  
Similarity=0.995480 0  
GCTTATAAGAAACCTCGCCTTTTTGAACTGCGCCGTGCTGTAGCAGCTGGCGGCCATTAATCTCATATAGCAT  
TTGACATCTAGTACTCTATTTTAGGAGGGATGCTCAATGAAAAAA

\*\*\*\*\*  
\*\*\*\*\*

Consensus:

GCTTATAAGAAACCTCGCCTTTTTGAACTGCGCCGTGCTGTAGCAGCTGGCGGCCATTAATCTCATATAGCAT  
TTGACATCTAGTACTCTATTTTAGGAGGGATGCTCAATGAAAAAA

>Bacillus\_Fam\_850\_116\_1 Nr. of seq. 1 Alignment length(with gaps) = 116  
Alignment score = 0.000000  
GCF\_000177235.2\_ASM17723v2\_genomic.fna\_1:1679718-1680414 Satlength=697 Nr  
of Repeats=6 RepeatLength=116 seed=CAAAAGGTCG Num.seqs=6  
Similarity=0.989272 0  
CAAAAGGTCGAACCTTTACCTTTTGGGGATTTTACGTAACGAGAGCGAAGTCGTCACAAAGAAGAGCACAAATG  
GAGTGAACCTCTCCATTAGTGCGAGTGACGAACGGAGCCTCGC

\*\*\*\*\*  
\*\*\*\*\*

Consensus:

CAAAAGGTCGAACCTTTACCTTTTGGGGATTTTACGTAACGAGAGCGAAGTCGTCACAAAGAAGAGCACAAATG  
GAGTGAACCTCTCCATTAGTGCGAGTGACGAACGGAGCCTCGC

>Bacillus\_Fam\_851\_115\_1 Nr. of seq. 1 Alignment length(with gaps) = 115  
Alignment score = 0.000000  
GCF\_000751775.1\_A1A\_genomic.fna\_102:38116-38692 Satlength=577 Nr of  
Repeats=5 RepeatLength=115 seed=CTCATAGAAC Num.seqs=4  
Similarity=0.868599 0  
CTCATAGAACGGCTATATGAGACAAAATTAGTTGAAAATCAAGCCAAAATGTCCCATAGAATTGCCCGGATCC  
CCTGCTATGGGACAAAACCAGCGGAAGCCGAAGCAAAAATGG

\*\*\*\*\*  
\*\*\*\*\*

Consensus:

CTCATAGAACGGCTATATGAGACAAAATTAGTTGAAAATCAAGCCAAAATGTCCCATAGAATTGCCCGGATCC  
CCTGCTATGGGACAAAACCAGCGGAAGCCGAAGCAAAAATGG

>Bacillus\_Fam\_852\_114\_1 Nr. of seq. 1 Alignment length(with gaps) = 114  
Alignment score = 0.000000  
GCF\_000621445.1\_ASM62144v1\_genomic.fna\_8:58648-59360 Satlength=713 Nr of  
Repeats=4 RepeatLength=114 seed=AAAAGGTATA Num.seqs=3  
Similarity=0.992203 0

AAAAGGTATAGGGCGACATTTTGGGTCGGGAGACGCTCGTTGCTCGCCATTTCAGAAGTACACTGAATGGCTTT  
AAGAGCGGGCAACGGCTTTCCCCCTCTTACGAGAAAGAACC

\*\*\*\*\*  
\*\*\*\*\*

Consensus:

AAAAGGTATAGGGCGACATTTTGGGTCGGGAGACGCTCGTTGCTCGCCATTTCAGAAGTACACTGAATGGCTTT  
AAGAGCGGGCAACGGCTTTCCCCCTCTTACGAGAAAGAACC

>Bacillus\_Fam\_853\_114\_1 Nr. of seq. 1 Alignment length(with gaps) = 114  
Alignment score = 0.000000  
GCF\_001274935.1\_ASM127493v1\_genomic.fna\_37:230037-231096 Satlength=1060  
Nr of Repeats=5 RepeatLength=114 seed=TTCTCTGTT Num.seqs=3  
Similarity=0.937622 0  
TTCTCTGTTCCTTCACTTTCCGACTCCGCTGTTTTTTCTCTTCTGCTTCGCGAGAGCCTGTGCTTTTGCCTTT  
GCGGCTGCTGCGGCCTTTTTCTTCGCCAGGGCTAGTGCGTC

\*\*\*\*\*  
\*\*\*\*\*

Consensus:

TTCTCTGTTCCTTCACTTTCCGACTCCGCTGTTTTTTCTCTTCTGCTTCGCGAGAGCCTGTGCTTTTGCCTTT  
GCGGCTGCTGCGGCCTTTTTCTTCGCCAGGGCTAGTGCGTC

>Bacillus\_Fam\_854\_114\_1 Nr. of seq. 1 Alignment length(with gaps) = 114  
Alignment score = 0.000000  
GCF\_900109925.1\_IMG-  
taxon\_2651870116\_annotated\_assembly\_genomic.fna\_28:73806-74259  
Satlength=454 Nr of Repeats=4 RepeatLength=114 seed=CACTTGATTC  
Num.seqs=3 Similarity=0.924638 0  
CACTTGATTCATGGAAGAAGATGACTCCTCGTCTGAGACCTCCGAATCAATGCTACTGGATTCATCCGGTGA  
GGGGGCAGAGTCATCGCAACAGGTAACCGTTTCATCCTCCA

\*\*\*\*\*  
\*\*\*\*\*

Consensus:

CACTTGATTCATGGAAGAAGATGACTCCTCGTCTGAGACCTCCGAATCAATGCTACTGGATTCATCCGGTGA  
GGGGGCAGAGTCATCGCAACAGGTAACCGTTTCATCCTCCA

>Bacillus\_Fam\_855\_111\_1 Nr. of seq. 1 Alignment length(with gaps) = 111  
Alignment score = 0.000000  
GCF\_000334155.1\_L1\_genomic.fna\_160:15-793 Satlength=779 Nr of Repeats=7  
RepeatLength=111 seed=TGTGGCGGAA Num.seqs=6 Similarity=1.000000  
0  
TGTGGCGGAATGGCAGACGCGCTAGACTTAGGATCTAGTGTCTTATGACGTGGGGGTTCAAGTCCCTTCACCC  
GCACTTTGAATTTTATAGAGTGATGAAACTGAAGCGGT

\*\*\*\*\*  
\*\*\*\*\*

Consensus:

TGTGGCGGAATGGCAGACGCGCTAGACTTAGGATCTAGTGTCTTATGACGTGGGGGTTCAAGTCCCTTCACCC  
GCACTTTGAATTTTTAGAGTGATGAAAAGTGAAGCGGT

>Bacillus\_Fam\_856\_111\_1 Nr. of seq. 1 Alignment length(with gaps) = 111  
Alignment score = 0.000000

GCF\_001648575.1\_ASM164857v1\_genomic.fna\_66:59259-59688 Satlength=430 Nr  
of Repeats=4 RepeatLength=111 seed=TTGCTGCTG Num.seqs=3  
Similarity=0.927928

0

TTGCTGCTGCGGCGGCTTTCTTTTTGGCTAGCTCCTTGGCGTCATCTGTTTCGGTTGCTGGAGCTTCGCCTG  
CTTCACTCTTTTGTTTTGCCAGTGCGGCAGCCTTTGCT

\*\*\*\*\*  
\*\*\*\*\*

Consensus:

TTGCTGCTGCGGCGGCTTTCTTTTTGGCTAGCTCCTTGGCGTCATCTGTTTCGGTTGCTGGAGCTTCGCCTG  
CTTCACTCTTTTGTTTTGCCAGTGCGGCAGCCTTTGCT

>Bacillus\_Fam\_857\_111\_1 Nr. of seq. 1 Alignment length(with gaps) = 111  
Alignment score = 0.000000

GCF\_900111815.1\_PRJEB17078\_genomic.fna\_1:2921195-2921687 Satlength=493 Nr  
of Repeats=5 RepeatLength=111 seed=CAGCGGCTTT Num.seqs=4  
Similarity=0.949950

0

CAGCGGCTTTTTCTTCGCTAAGTCGTCTGCTTCCCCAGCTGGCGGCGTTTCTGAGTCTGACTCTTTCGCTTT  
CATTTTCGCGAGTGCGGCAGCCTTTGCTTTTCGCTGCTG

\*\*\*\*\*  
\*\*\*\*\*

Consensus:

CAGCGGCTTTTTCTTCGCTAAGTCGTCTGCTTCCCCAGCTGGCGGCGTTTCTGAGTCTGACTCTTTCGCTTT  
CATTTTCGCGAGTGCGGCAGCCTTTGCTTTTCGCTGCTG

>Bacillus\_Fam\_858\_110\_1 Nr. of seq. 1 Alignment length(with gaps) = 110  
Alignment score = 0.000000

GCF\_000161455.1\_ASM16145v1\_genomic.fna\_1:5374739-5375117 Satlength=379 Nr  
of Repeats=4 RepeatLength=111 seed=GATATGGCAA Num.seqs=3  
Similarity=0.448118

0

GATATGGCAAAAGTGTTCATGTTTTATATGTGTCAAATATTANNGAAACANCTATAAAACGTTGATATATAA  
GGGNTATAAGATGTTTCNNATATTTATTAGGTCAAG

\*\*\*\*\*  
\*\*\*\*\*

Consensus:

GATATGGCAAAAGTGTTCATGTTTTATATGTGTCAAATATTANNGAAACANCTATAAAACGTTGATATATAA  
GGGNTATAAGATGTTTCNNATATTTATTAGGTCAAG

>Bacillus\_Fam\_859\_110\_1 Nr. of seq. 1 Alignment length(with gaps) = 110  
Alignment score = 0.000000

GCF\_000712615.1\_ASM71261v1\_genomic.fna\_61:8384-8914 Satlength=531 Nr of  
Repeats=5 RepeatLength=112 seed=AGGATACCGC Num.seqs=3

Similarity=0.546448

0

AGGATACCGCAAACGTGTTGCAAGTTAAGTTATANGTATATGAATAAGAAAAAACGNCTATCCTTTGATATA  
TAAGGNATTCGAGTNAAATGACAAAAAAGTTAGGGTA

\*\*\*\*\*  
\*\*\*\*\*

Consensus:

AGGATACCGCAAACGTGTTGCAAGTTAAGTTATANGTATATGAATAAGAAAAAACGNCTATCCTTTGATATA  
TAAGGNATTCGAGTNAAATGACAAAAAAGTTAGGGTA

>Bacillus\_Fam\_860\_108\_1 Nr. of seq. 1 Alignment length(with gaps) = 108

Alignment score = 0.000000

GCF\_000374565.1\_ASM37456v1\_genomic.fna\_3:32442-32847 Satlength=406 Nr of  
Repeats=4 RepeatLength=108 seed=ACAGGTCCAG Num.seqs=3

Similarity=0.732510

0

ACAGGTCCAGTTGGTCCNCNAGGAGCGACGGGCCCCCGGNCCTACAGGAGCAGTAGGCCAGCAGGGCCAA  
CAGGAGCCCCAGGCCCGATCGGCCCAATGGGAGCG

\*\*\*\*\*  
\*\*\*\*\*

Consensus:

ACAGGTCCAGTTGGTCCNCNAGGAGCGACGGGCCCCCGGNCCTACAGGAGCAGTAGGCCAGCAGGGCCAA  
CAGGAGCCCCAGGCCCGATCGGCCCAATGGGAGCG

>Bacillus\_Fam\_861\_106\_1 Nr. of seq. 1 Alignment length(with gaps) = 106

Alignment score = 0.000000

GCF\_900156865.1\_PRJEB18960\_genomic.fna\_3:3352570-3353080 Satlength=511 Nr  
of Repeats=5 RepeatLength=106 seed=TTTTTAGGAG Num.seqs=4

Similarity=0.830189

0

TTTTTAGGAGATAGCGAACCTGCAACATGCCTTTGCGGGTTCGCAATTGGATAATATTAGGAAACACCATTCC  
TGTATAACTCATTTGCATCCTCGCACTTGGATA

\*\*\*\*\*  
\*\*\*\*\*

Consensus:

TTTTTAGGAGATAGCGAACCTGCAACATGCCTTTGCGGGTTCGCAATTGGATAATATTAGGAAACACCATTCC  
TGTATAACTCATTTGCATCCTCGCACTTGGATA

>Bacillus\_Fam\_862\_105\_1 Nr. of seq. 1 Alignment length(with gaps) = 105

Alignment score = 0.000000

GCF\_000017425.1\_ASM1742v1\_genomic.fna\_1:3693939-3694896 Satlength=958 Nr  
of Repeats=4 RepeatLength=105 seed=CTGAAACAGC Num.seqs=3

Similarity=0.932275

0

CTGAAACAGCAACTGGAAACGAAAGACGAGCAGATTGAGAAGCTAGAACAAGAAAAGCAAAAGTTAGAAACCC  
AAATGAATCAGTTGCAAGGAGGGCCAGAAAAT

\*\*\*\*\*  
\*\*\*\*\*

Consensus:



CTGAAACAGCAACTGGAAACGAAAGACGAGCAGATTGAGAAGCTAGAACAAGAAAAGCAAAAGTTAGAAACCC  
AAATGAATCAGTTGCAAGGAGGGCCAGAAAAT

>Bacillus\_Fam\_863\_105\_1 Nr. of seq. 1 Alignment length(with gaps) = 105  
Alignment score = 0.000000  
GCF\_000177235.2\_ASM17723v2\_genomic.fna\_1:913685-914101 Satlength=417 Nr  
of Repeats=4 RepeatLength=104 seed=AGCGCCCAT Num.seqs=4  
Similarity=0.926455

0  
AGCGCCCCATTCTAAAGGGAAAAATATATGTAGAAAGGCGCACAAATCGAAATAGCGGGCCATTGAGAGAAAG  
AAAAAGCAATAGAAATGGCCAGCAAAATAAAAT

\*\*\*\*\*  
\*\*\*\*\*

Consensus:

AGCGCCCCATTCTAAAGGGAAAAATATATGTAGAAAGGCGCACAAATCGAAATAGCGGGCCATTGAGAGAAAG  
AAAAAGCAATAGAAATGGCCAGCAAAATAAAAT

>Bacillus\_Fam\_864\_105\_1 Nr. of seq. 1 Alignment length(with gaps) = 105  
Alignment score = 0.000000  
GCF\_000813125.1\_ASM81312v1\_genomic.fna\_80:7351-7877 Satlength=527 Nr of  
Repeats=5 RepeatLength=105 seed=TATCTATGTC Num.seqs=4  
Similarity=0.879365

0  
TATCTATGTCAACTGGTATAGCAATGAAGCAATTCGATCAAAGCTTAAAAAACTAACGGCTCTTCCAACTGA  
GAATCTAAACAGTGTAAATAAATTCCTCATTGC

\*\*\*\*\*  
\*\*\*\*\*

Consensus:

TATCTATGTCAACTGGTATAGCAATGAAGCAATTCGATCAAAGCTTAAAAAACTAACGGCTCTTCCAACTGA  
GAATCTAAACAGTGTAAATAAATTCCTCATTGC

>Bacillus\_Fam\_865\_105\_1 Nr. of seq. 1 Alignment length(with gaps) = 105  
Alignment score = 0.000000  
GCF\_001591485.1\_ASM159148v1\_genomic.fna\_104:1301-1875 Satlength=575 Nr of  
Repeats=5 RepeatLength=105 seed=CTTCAGACAG Num.seqs=3  
Similarity=0.690112

0  
CTTCAGACAGAGGCNGGCATGCCTTTCTCTTTGTTGTCCGAACCTACGGTAACTTCGGACTGTACTCGAGTTT  
TTCTTGAGGTTAAGTGTCCAAACCTTCTNCGA

\*\*\*\*\*  
\*\*\*\*\*

Consensus:

CTTCAGACAGAGGCNGGCATGCCTTTCTCTTTGTTGTCCGAACCTACGGTAACTTCGGACTGTACTCGAGTTT  
TTCTTGAGGTTAAGTGTCCAAACCTTCTNCGA

>Bacillus\_Fam\_866\_104\_1 Nr. of seq. 1 Alignment length(with gaps) = 104  
Alignment score = 0.000000

GCF\_000294775.2\_ASM29477v2\_genomic.fna\_1:3556334-3556750 Satlength=417 Nr  
of Repeats=4 RepeatLength=104 seed=GGACTCTGGT Num.seqs=4  
Similarity=0.833074 0  
GGACTCTGGTTGAGGATATCACGTATTTTGGGTCCAAACCTGAGCCTACTTCAGACTCTGGTTGAGCTCATCC  
TGAAATGTGAGTCCGAACCTAGTACAACCTC

\*\*\*\*\*  
\*\*\*\*\*

Consensus:

GGACTCTGGTTGAGGATATCACGTATTTTGGGTCCAAACCTGAGCCTACTTCAGACTCTGGTTGAGCTCATCC  
TGAAATGTGAGTCCGAACCTAGTACAACCTC

>Bacillus\_Fam\_867\_104\_1 Nr. of seq. 1 Alignment length(with gaps) = 104  
Alignment score = 0.000000  
GCF\_000752035.1\_Bacillus\_rubiinfantis\_genomic.fna\_11:159625-160145  
Satlength=521 Nr of Repeats=5 RepeatLength=104 seed=TGGTTTCTTA  
Num.seqs=5 Similarity=0.882243 0  
TGGTTTCTTACCGTACCAATGATTTCCCTCTTTCTAGGGCAAATCAACGCTTGATTTTTACCGCCTGAACC  
GTTTTTCTCTTCCTTGGGAAAATTCATTAA

\*\*\*\*\*  
\*\*\*\*\*

Consensus:

TGGTTTCTTACCGTACCAATGATTTCCCTCTTTCTAGGGCAAATCAACGCTTGATTTTTACCGCCTGAACC  
GTTTTTCTCTTCCTTGGGAAAATTCATTAA

>Bacillus\_Fam\_868\_104\_1 Nr. of seq. 1 Alignment length(with gaps) = 104  
Alignment score = 0.000000  
GCF\_001636345.1\_ASM163634v1\_genomic.fna\_1:1851553-1851970 Satlength=418  
Nr of Repeats=4 RepeatLength=104 seed=GAGGTGTGTT Num.seqs=3  
Similarity=0.923077 0  
GAGGTGTGTTTCGGAGCTAAACGCGACTATGAAATCCTATATATGGAAAATAGTGTCGTGGAAATGCTCTAAT  
CACGACAGAATAATCCAATAAATGGATAACA

\*\*\*\*\*  
\*\*\*\*\*

Consensus:

GAGGTGTGTTTCGGAGCTAAACGCGACTATGAAATCCTATATATGGAAAATAGTGTCGTGGAAATGCTCTAAT  
CACGACAGAATAATCCAATAAATGGATAACA

>Bacillus\_Fam\_869\_104\_1 Nr. of seq. 1 Alignment length(with gaps) = 104  
Alignment score = 0.000000  
GCF\_001645705.1\_ASM164570v1\_genomic.fna\_56:37601-38537 Satlength=937 Nr  
of Repeats=9 RepeatLength=104 seed=TTTCTGAAT Num.seqs=9  
Similarity=0.892450  
0  
TTTTCTGAATTGCAACGCTTTATGGGTTCTATGAAACCTGCTATATTACCACTTTTGAAGATTACAACCCATT  
ACGGGAACCTATGAACCGCACTATGCGACCGC

\*\*\*\*\*  
\*\*\*\*\*

Consensus:

TTTTCTGAATTGCAACGCTTTATGGGTTCATGAAACCTGCTATATTACCACTTTTGAAGATTACAACCCATT  
ACGGGAACCTATGAACCGCACTATGCGACCGC

>Bacillus\_Fam\_870\_104\_1 Nr. of seq. 1 Alignment length(with gaps) = 104  
Alignment score = 0.000000  
GCF\_002019645.1\_ASM201964v1\_genomic.fna\_1:591573-591926 Satlength=354 Nr  
of Repeats=4 RepeatLength=104 seed=CGTCAAGTCC Num.seqs=3  
Similarity=0.891005 0  
CGTCAAGTCCCGGTGTANGATTAAAAATCCGGCGGGTTCCGAATGAAATCGGGCCAGATGGAAGACAAATCGG  
GCGGGAATCAAGGTAAATCCGGCAAGCCGGG

\*\*\*\*\*  
\*\*\*\*\*

Consensus:

CGTCAAGTCCCGGTGTANGATTAAAAATCCGGCGGGTTCCGAATGAAATCGGGCCAGATGGAAGACAAATCGG  
GCGGGAATCAAGGTAAATCCGGCAAGCCGGG

>Bacillus\_Fam\_871\_104\_1 Nr. of seq. 1 Alignment length(with gaps) = 104  
Alignment score = 0.000000  
GCF\_002019645.1\_ASM201964v1\_genomic.fna\_1:2399755-2400142 Satlength=388  
Nr of Repeats=4 RepeatLength=104 seed=GAAAGCGGCG Num.seqs=3  
Similarity=0.910256 0  
GAAAGCGGCGACTTTTCAGAAAGAATCCGGCGGGAAAGCGAGGAAATCCGGCGAGANACATTTCGAGTGACTGGT  
TCGGGTGAAAAAACGGGCGGGATTTAGAAG

\*\*\*\*\*  
\*\*\*\*\*

Consensus:

GAAAGCGGCGACTTTTCAGAAAGAATCCGGCGGGAAAGCGAGGAAATCCGGCGAGANACATTTCGAGTGACTGGT  
TCGGGTGAAAAAACGGGCGGGATTTAGAAG

>Bacillus\_Fam\_872\_104\_1 Nr. of seq. 1 Alignment length(with gaps) = 104  
Alignment score = 0.000000  
GCF\_002019645.1\_ASM201964v1\_genomic.fna\_1:4123904-4124424 Satlength=521  
Nr of Repeats=5 RepeatLength=104 seed=ACCCGCCCGA Num.seqs=3  
Similarity=0.940171 0  
ACCCGCCCGATTATTCACTTTTCTCGCCGGATAATTGACCCGGATTTGACCCAGATTCCAGAACTGGCCCCGAT  
TTTCTTTGGATCCCGCCGCATTTCGAGCTCAC

\*\*\*\*\*  
\*\*\*\*\*

Consensus:

ACCCGCCCGATTATTCACTTTTCTCGCCGGATAATTGACCCGGATTTGACCCAGATTCCAGAACTGGCCCCGAT  
TTTCTTTGGATCCCGCCGCATTTCGAGCTCAC

>Bacillus\_Fam\_873\_104\_1 Nr. of seq. 1 Alignment length(with gaps) = 104  
Alignment score = 0.000000  
GCF\_900156875.1\_PRJEB18969\_genomic.fna\_11:1022316-1022802 Satlength=487  
Nr of Repeats=5 RepeatLength=104 seed=ACAAGAAATT Num.seqs=3

Similarity=0.931624 0  
ACAAGAAATTGGGTCTGAATAAAATCGTAATTCAGACAAGAGATCTGCTAAGGTGAGAAATCAAGTCCGAATG  
GGCGGGGGATTTCAGACAGAAAAGAGACTTCA

\*\*\*\*\*  
\*\*\*\*\*

Consensus:

ACAAGAAATTGGGTCTGAATAAAATCGTAATTCAGACAAGAGATCTGCTAAGGTGAGAAATCAAGTCCGAATG  
GGCGGGGGATTTCAGACAGAAAAGAGACTTCA

>Bacillus\_Fam\_874\_103\_1 Nr. of seq. 1 Alignment length(with gaps) = 103  
Alignment score = 0.000000  
GCF\_000177235.2\_ASM17723v2\_genomic.fna\_1:3310743-3311151 Satlength=409 Nr  
of Repeats=4 RepeatLength=103 seed=TTTATTCTAC Num.seqs=3  
Similarity=0.892125 0  
TTTATTCTACCTTCACACGATTCTCCNCGTCATGACGGGACTTTAAAACATGGTTCTTACCCCTTCAGACCGG  
GGCGTTCACTCTAAAAGGATATTAAATCGT

\*\*\*\*\*  
\*\*\*\*\*

Consensus:

TTTATTCTACCTTCACACGATTCTCCNCGTCATGACGGGACTTTAAAACATGGTTCTTACCCCTTCAGACCGG  
GGCGTTCACTCTAAAAGGATATTAAATCGT

>Bacillus\_Fam\_875\_103\_1 Nr. of seq. 1 Alignment length(with gaps) = 103  
Alignment score = 0.000000  
GCF\_001420715.1\_ASM142071v1\_genomic.fna\_22:278070-278585 Satlength=516 Nr  
of Repeats=5 RepeatLength=103 seed=AACTTTTGG Num.seqs=5  
Similarity=0.919741 0  
AACTTTTGGAAAAAGTGCTGAACTAAAGAGTGGAACGCGGAACCGCCAGAGGAATGCTGAAAAAATGGAGA  
TTAACGCTGAAATAGGGGAGGAAAACGCTG

\*\*\*\*\*  
\*\*\*\*\*

Consensus:

AACTTTTGGAAAAAGTGCTGAACTAAAGAGTGGAACGCGGAACCGCCAGAGGAATGCTGAAAAAATGGAGA  
TTAACGCTGAAATAGGGGAGGAAAACGCTG

>Bacillus\_Fam\_876\_102\_1 Nr. of seq. 1 Alignment length(with gaps) = 102  
Alignment score = 0.000000  
GCF\_000217835.1\_ASM21783v1\_genomic.fna\_1:395335-395743 Satlength=409 Nr  
of Repeats=4 RepeatLength=102 seed=GGTTGGAAGC Num.seqs=4  
Similarity=0.906419  
0  
GGTTGGAAGCACATGGAACCTCTGCAATCAAAAATATAGATACACTAAAATCATTCTCTGACCCTTTGAAAGAT  
ACACGAAAAGCCCTTGCTTCAATTGCAGA

\*\*\*\*\*  
\*\*\*\*\*

Consensus:

GGTTGGAAGCACATGGAACCTCTGCAATCAAAAATATAGATACACTAAAATCATTCTCTGACCCTTTGAAAGAT  
ACACGAAAAGCCCTTGCTTCAATTGCAGA

>Bacillus\_Fam\_877\_99\_1 Nr. of seq. 1 Alignment length(with gaps) = 99  
Alignment score = 0.000000  
GCF\_000299035.1\_ASM29903v1\_genomic.fna\_2:1202161-1203221 Satlength=1061  
Nr of Repeats=7 RepeatLength=99 seed=AACAAAAATA Num.seqs=6  
Similarity=1.000000 0  
AACAAAAATAACAGTAACGATGAAGATACAGAAACAACATCGAATGAAAAATAAACAATACAAAACAAGATA  
ACGATAATCAACAAAATTCTAACAAC

\*\*\*\*\*  
\*\*\*\*\*

Consensus:

AACAAAAATAACAGTAACGATGAAGATACAGAAACAACATCGAATGAAAAATAAACAATACAAAACAAGATA  
ACGATAATCAACAAAATTCTAACAAC

>Bacillus\_Fam\_878\_99\_1 Nr. of seq. 1 Alignment length(with gaps) = 99  
Alignment score = 0.000000  
GCF\_000831065.1\_ASM83106v1\_genomic.fna\_1:1522811-1523306 Satlength=496 Nr  
of Repeats=5 RepeatLength=99 seed=CGAAGAAGAA Num.seqs=3  
Similarity=0.637540 0  
CGAAGAAGAACTACATGTAGANAACTACTAAGCATNAATTTGGAAAAACGCTAGAAACGTATGCGCAAAGT  
GGTGAGATAGCAGAACAAATNGAACG

\*\*\*\*\*  
\*\*\*\*\*

Consensus:

CGAAGAAGAACTACATGTAGANAACTACTAAGCATNAATTTGGAAAAACGCTAGAAACGTATGCGCAAAGT  
GGTGAGATAGCAGAACAAATNGAACG

>Bacillus\_Fam\_879\_93\_1 Nr. of seq. 1 Alignment length(with gaps) = 93  
Alignment score = 0.000000  
GCF\_000430785.1\_ASM43078v1\_genomic.fna\_27:11652-12024 Satlength=373 Nr of  
Repeats=4 RepeatLength=93 seed=ATTACCCAAC Num.seqs=4 Similarity=0.947431  
0  
ATTACCCAAC TAGAAATGAACCTGCACCTCCAGATACACAACACATAATGCAAATGATGACAAGTCTCGAGGA  
TCGATTAAATAAACTCACTA

\*\*\*\*\*  
\*\*\*\*\*

Consensus:

ATTACCCAAC TAGAAATGAACCTGCACCTCCAGATACACAACACATAATGCAAATGATGACAAGTCTCGAGGA  
TCGATTAAATAAACTCACTA

>Bacillus\_Fam\_880\_90\_1 Nr. of seq. 1 Alignment length(with gaps) = 90  
Alignment score = 0.000000  
GCF\_000008505.1\_ASM850v1\_genomic.fna\_2:8851-9571 Satlength=721 Nr of  
Repeats=7 RepeatLength=90 seed=CGTTCTACTT Num.seqs=6 Similarity=0.952593  
0

CGTTCTACTTGCTGACGATCACCTTTTGCCTGATCGTTTGGCACTTCATTTCTTCCTGGGTTATTTATTTCGAT  
TAGCTACTTCCAATTCT

\*\*\*\*\*  
\*\*\*\*\*

Consensus:

CGTTCTACTTGCTGACGATCACCTTTTGCCTGATCGTTTGGCACTTCATTTCTTCCTGGGTTATTTATTTCGAT  
TAGCTACTTCCAATTCT

>Bacillus\_Fam\_881\_84\_1 Nr. of seq. 1 Alignment length(with gaps) = 84  
Alignment score = 0.000000  
GCF\_000008505.1\_ASM850v1\_genomic.fna\_2:8167-8587 Satlength=421 Nr of  
Repeats=5 RepeatLength=84 seed=ACTTCTCGTT Num.seqs=5 Similarity=0.876863  
0  
ACTTCTCGTTGAACTGTCGTTCCATTTACGCTCACGTTTCCGCTATTTACTGATCCTTGATTCTTCACATTAT  
CCTGTACGTTT

\*\*\*\*\*  
\*\*\*\*\*

Consensus:

ACTTCTCGTTGAACTGTCGTTCCATTTACGCTCACGTTTCCGCTATTTACTGATCCTTGATTCTTCACATTAT  
CCTGTACGTTT

>Bacillus\_Fam\_882\_84\_1 Nr. of seq. 1 Alignment length(with gaps) = 84  
Alignment score = 0.000000  
GCF\_000831065.1\_ASM83106v1\_genomic.fna\_1:918773-919151 Satlength=379 Nr  
of Repeats=5 RepeatLength=84 seed=AATTAGCAGA Num.seqs=3  
Similarity=0.862434  
0  
AATTAGCAGATGGCTCAAGTCAAGTAACAGGCGGTTTAGGAACATTATCTGTAGGAGCAAATCAAATGGCAGG  
TGGAGTAAATC

\*\*\*\*\*  
\*\*\*\*\*

Consensus:

AATTAGCAGATGGCTCAAGTCAAGTAACAGGCGGTTTAGGAACATTATCTGTAGGAGCAAATCAAATGGCAGG  
TGGAGTAAATC

>Bacillus\_Fam\_883\_84\_1 Nr. of seq. 1 Alignment length(with gaps) = 84  
Alignment score = 0.000000  
GCF\_001712755.1\_ASM171275v1\_genomic.fna\_23:202276-202863 Satlength=588 Nr  
of Repeats=7 RepeatLength=84 seed=AACTCTTCT Num.seqs=6  
Similarity=0.671318 0  
AACTCTTCTTTGCGCATTCAATTACTTCTTCGCTAATAAATGGTGCCACNCNTGTTAATCCTTTAATAC  
CATTCGTTTCA

\*\*\*\*\*  
\*\*\*\*\*

Consensus:

AACTCTTTCTTTGCGCATTCATCAATTACTTCTTCGCTAATAAATGGTGCCACNCNTGTTAATCCTTTAATAC  
CATTCGTTTCA

>Bacillus\_Fam\_884\_84\_1 Nr. of seq. 1 Alignment length(with gaps) = 84  
Alignment score = 0.000000  
GCF\_002019765.1\_ASM201976v1\_genomic.fna\_1:1293407-1293689 Satlength=283  
Nr of Repeats=4 RepeatLength=84 seed=AAGCTGTGGA Num.seqs=3  
Similarity=0.947090 0  
AAGCTGTGGAACAAGAAGACACAGAATCGAAACAAGCTGATGCAGAAATCGCTGTTCAAGAAAAGGAAGAGCT  
AAAACAAGTTG

\*\*\*\*\*  
\*\*\*\*\*  
Consensus:

AAGCTGTGGAACAAGAAGACACAGAATCGAAACAAGCTGATGCAGAAATCGCTGTTCAAGAAAAGGAAGAGCT  
AAAACAAGTTG

>Bacillus\_Fam\_885\_81\_1 Nr. of seq. 1 Alignment length(with gaps) = 81  
Alignment score = 0.000000  
GCF\_001315085.1\_ASM131508v1\_genomic.fna\_36:14169-14493 Satlength=325 Nr  
of Repeats=4 RepeatLength=81 seed=ACTCAGGTTG Num.seqs=4  
Similarity=0.895748  
0  
ACTCAGGTTGGTTGACTTGGTCATTAAGATCTTCAATAACTTCTGTGATTGGAGCAGAGTCAATAGGTATTTCT  
TGAACCTG

\*\*\*\*\*  
\*\*\*\*\*  
Consensus:

ACTCAGGTTGGTTGACTTGGTCATTAAGATCTTCAATAACTTCTGTGATTGGAGCAGAGTCAATAGGTATTTCT  
TGAACCTG

>Bacillus\_Fam\_886\_78\_1 Nr. of seq. 1 Alignment length(with gaps) = 78  
Alignment score = 0.000000  
GCF\_001420715.1\_ASM142071v1\_genomic.fna\_22:1482589-1482958 Satlength=370  
Nr of Repeats=5 RepeatLength=78 seed=AGGAGCAAGA Num.seqs=3  
Similarity=0.886040 0  
AGGAGCAAGAATCGGAAGAAGAAGTAGCATTAAATTCTGATGCAAATCAACCAGAAGTAGAAGAACAATCACT  
GCAAG

\*\*\*\*\*  
\*\*\*\*\*  
Consensus:

AGGAGCAAGAATCGGAAGAAGAAGTAGCATTAAATTCTGATGCAAATCAACCAGAAGTAGAAGAACAATCACT  
GCAAG

>Bacillus\_Fam\_887\_78\_1 Nr. of seq. 1 Alignment length(with gaps) = 78  
Alignment score = 0.000000  
GCF\_900107275.1\_IMG-  
taxon\_2675903024\_annotated\_assembly\_genomic.fna\_42:634601-635147

Satlength=547 Nr of Repeats=7 RepeatLength=78 seed=CAGAGAACAA Num.seqs=7  
Similarity=0.931624 0  
CAGAGAACAATCAGGAAGGAACAGCGAAAACAGTGTTGGCAGAAAGTAATCAGGCAGGAGCATCAGAACCAGC  
GTCGT

\*\*\*\*\*  
\*\*\*\*\*  
Consensus:

CAGAGAACAATCAGGAAGGAACAGCGAAAACAGTGTTGGCAGAAAGTAATCAGGCAGGAGCATCAGAACCAGC  
GTCGT

>Bacillus\_Fam\_888\_76\_1 Nr. of seq. 1 Alignment length(with gaps) = 76  
Alignment score = 0.000000  
GCF\_001700275.1\_ASM170027v1\_genomic.fna\_23:136895-137354 Satlength=460 Nr  
of Repeats=6 RepeatLength=76 seed=TGAAGCTTGA Num.seqs=5  
Similarity=0.957895 0  
TGAAGCTTGACGCGAAAAGATGAAGTAAAACGTTGATATAAGGGATAGAACTGCGCATAGCTTGACGTAAGCA  
ACG

\*\*\*\*\*  
\*\*\*  
Consensus:

TGAAGCTTGACGCGAAAAGATGAAGTAAAACGTTGATATAAGGGATAGAACTGCGCATAGCTTGACGTAAGCA  
ACG

>Bacillus\_Fam\_889\_75\_1 Nr. of seq. 1 Alignment length(with gaps) = 75  
Alignment score = 0.000000  
GCF\_001273755.1\_ASM127375v1\_genomic.fna\_17:1713467-1714367 Satlength=901  
Nr of Repeats=12 RepeatLength=75 seed=TATTATCTGG Num.seqs=12  
Similarity=0.997037 0  
TATTATCTGGGTCAGTTGCATCTTTAGGGTCTTCAATCGGATCTTCTTTATTAGTGCCCCCATCATTTTCATC  
GA

\*\*\*\*\*  
\*\*  
Consensus:

TATTATCTGGGTCAGTTGCATCTTTAGGGTCTTCAATCGGATCTTCTTTATTAGTGCCCCCATCATTTTCATC  
GA

>Bacillus\_Fam\_890\_75\_1 Nr. of seq. 1 Alignment length(with gaps) = 75  
Alignment score = 0.000000  
GCF\_002019705.1\_ASM201970v1\_genomic.fna\_1:1610549-1611374 Satlength=826  
Nr of Repeats=11 RepeatLength=75 seed=GAGCAAGATT Num.seqs=11  
Similarity=0.929535 0  
GAGCAAGATTCTGATTCCTCTCTAGATGAAGATGTTTCTCTTGATAACGACGCTTCTGAAGACCAGGATGCAG  
AT

\*\*\*\*\*  
\*\*  
Consensus:



GAGCAAGATTCTGATTCTCTCTAGATGAAGATGTTTCTCTTGATAACGACGCTTCTGAAGACCAGGATGCAG  
AT

>Bacillus\_Fam\_891\_74\_1 Nr. of seq. 1 Alignment length(with gaps) = 74  
Alignment score = 0.000000  
GCF\_001591485.1\_ASM159148v1\_genomic.fna\_259:34-767 Satlength=734 Nr of  
Repeats=10 RepeatLength=73 seed=CTTTC AATCC Num.seqs=6  
Similarity=0.458642  
0  
CTTTC AATCCCCTAAATCGGGTCACATCTTTTGCTACGANNTATGAAGATTCGTTAANAATCTAACAGTTATT  
N

\*\*\*\*\*  
\*  
Consensus:

CTTTC AATCCCCTAAATCGGGTCACATCTTTTGCTACGANNTATGAAGATTCGTTAANAATCTAACAGTTATT  
N

>Bacillus\_Fam\_892\_73\_1 Nr. of seq. 1 Alignment length(with gaps) = 73  
Alignment score = 0.000000  
GCF\_000331575.1\_ASM33157v1\_genomic.fna\_4:228971-229263 Satlength=293 Nr  
of Repeats=4 RepeatLength=73 seed=CACGCAAGTA Num.seqs=4  
Similarity=0.978691  
0  
CACGCAAGTATCACTATGGTAATTTGACGGACATAACTCCACAACGAGATCCCAGAAAGAATCTCTAAAATGA

\*\*\*\*\*  
Consensus:

CACGCAAGTATCACTATGGTAATTTGACGGACATAACTCCACAACGAGATCCCAGAAAGAATCTCTAAAATGA

>Bacillus\_Fam\_893\_72\_1 Nr. of seq. 1 Alignment length(with gaps) = 72  
Alignment score = 0.000000  
GCF\_000712615.1\_ASM71261v1\_genomic.fna\_39:34707-34986 Satlength=280 Nr of  
Repeats=4 RepeatLength=72 seed=CAGTAACACC Num.seqs=3 Similarity=0.618656  
0  
CAGTAACACCAGTTGCGCCAATCGAAAATGAAGTACCAAATTCAGAAGTGGCCGCTGGGCCAATGTCAACAC

\*\*\*\*\*  
Consensus:

CAGTAACACCAGTTGCGCCAATCGAAAATGAAGTACCAAATTCAGAAGTGGCCGCTGGGCCAATGTCAACAC

>Bacillus\_Fam\_894\_70\_1 Nr. of seq. 1 Alignment length(with gaps) = 70  
Alignment score = 0.000000  
GCF\_900142675.1\_IMG-  
taxon\_2654588196\_annotated\_assembly\_genomic.fna\_5:575590-575991  
Satlength=402 Nr of Repeats=6 RepeatLength=66 seed=TGAGTGC GTG Num.seqs=4  
Similarity=0.434942 0  
TGAGTGC GTGGATTGAAATAACTACGNCNTTGANCAATGCAATATCNCAATTAGCTAGTCGCACTTTTTG

\*\*\*\*\*

Consensus:

TGAGTGC GTGGATTGAAATAACTACGNCNTTGANCAATGCAATATCNCAATTAGCTAGTCGCACTTTTGTG

>Bacillus\_Fam\_895\_69\_1 Nr. of seq. 1 Alignment length(with gaps) = 69  
Alignment score = 0.000000  
GCF\_000331575.1\_ASM33157v1\_genomic.fna\_3:79046-79529 Satlength=484 Nr of  
Repeats=7 RepeatLength=69 seed=TAATTTCTGA Num.seqs=7 Similarity=0.994479  
0

TAATTTCTGACTTTGTACCTTCAATAGATGTTCCGTTTGTTAATGTTTCAGGTAAAGAGAATTATATGGT

\*\*\*\*\*

Consensus:

TAATTTCTGACTTTGTACCTTCAATAGATGTTCCGTTTGTTAATGTTTCAGGTAAAGAGAATTATATGGT

>Bacillus\_Fam\_896\_69\_1 Nr. of seq. 1 Alignment length(with gaps) = 69  
Alignment score = 0.000000  
GCF\_000508325.1\_BAVI\_1\_genomic.fna\_9:15902-17486 Satlength=1585 Nr of  
Repeats=24 RepeatLength=66 seed=GTCGCACCT Num.seqs=16  
Similarity=0.306590  
0

GTCGCACCTTACATGGGTGCGTGGATTGAAATNAANGNGNCAATNAANNCGNATNNTTNATNAGNNNCN

\*\*\*\*\*

Consensus:

GTCGCACCTTACATGGGTGCGTGGATTGAAATNAANGNGNCAATNAANNCGNATNNTTNATNAGNNNCN

>Bacillus\_Fam\_897\_68\_1 Nr. of seq. 1 Alignment length(with gaps) = 68  
Alignment score = 0.000000  
GCF\_000948175.1\_BFA\_2\_A\_genomic.fna\_164:33120-33442 Satlength=323 Nr of  
Repeats=5 RepeatLength=64 seed=GTTTTATCTG Num.seqs=4 Similarity=0.452635  
0 GTTTTATCTGAACGTAGTGGGATATAAAGTTTAANTTCGCATAANAANCTNTNACCTTAGCCGANNNT

\*\*\*\*\*

Consensus:

GTTTTATCTGAACGTAGTGGGATATAAAGTTTAANTTCGCATAANAANCTNTNACCTTAGCCGANNNT

>Bacillus\_Fam\_898\_68\_1 Nr. of seq. 1 Alignment length(with gaps) = 68  
Alignment score = 0.000000  
GCF\_900107275.1\_IMG-  
taxon\_2675903024\_annotated\_assembly\_genomic.fna\_13:136989-137520  
Satlength=532 Nr of Repeats=8 RepeatLength=66 seed=GTCGCACTCT Num.seqs=5  
Similarity=0.485897  
0

GTCGCACTCTATGTGAGTGCGTGGATTGAAATANCTNTTTGNNCCNGNTCAGCNTANNTTNCAGTACN

\*\*\*\*\*

Consensus:

GTCGCACTCTATGTGAGTGCGTGGATTGAAATANCTNTTTGNNCCNGNTCAGCNTANNTTNCAGTACN

>Bacillus\_Fam\_899\_68\_1 Nr. of seq. 1 Alignment length(with gaps) = 68  
Alignment score = 0.000000  
GCF\_900107275.1\_IMG-  
taxon\_2675903024\_annotated\_assembly\_genomic.fna\_13:161926-162191  
Satlength=266 Nr of Repeats=4 RepeatLength=66 seed=TCGCACTCTA Num.seqs=3  
Similarity=0.526190 0  
TCGCACTCTATATGAGTGCGTGGATTGAAATTCCTTCTNCTNTTCTTTAGCCGTTCCNNCGNTTGCAG

\*\*\*\*\*  
Consensus:

TCGCACTCTATATGAGTGCGTGGATTGAAATTCCTTCTNCTNTTCTTTAGCCGTTCCNNCGNTTGCAG

>Bacillus\_Fam\_900\_68\_1 Nr. of seq. 1 Alignment length(with gaps) = 68  
Alignment score = 0.000000  
GCF\_900142675.1\_IMG-  
taxon\_2654588196\_annotated\_assembly\_genomic.fna\_5:556930-557330  
Satlength=401 Nr of Repeats=6 RepeatLength=67 seed=GTCGCACTCT Num.seqs=4  
Similarity=0.700980 0  
GTCGCACTCTTAGTGAGTGCGTGGATTGAAATNTAATGGCAACTACACCCAAAAGAAAAGGCAAATC

\*\*\*\*\*  
Consensus:

GTCGCACTCTTAGTGAGTGCGTGGATTGAAATNTAATGGCAACTACACCCAAAAGAAAAGGCAAATC

>Bacillus\_Fam\_901\_68\_1 Nr. of seq. 1 Alignment length(with gaps) = 68  
Alignment score = 0.000000  
GCF\_900142675.1\_IMG-  
taxon\_2654588196\_annotated\_assembly\_genomic.fna\_5:580013-580479  
Satlength=467 Nr of Repeats=7 RepeatLength=66 seed=TGGATTGAAA Num.seqs=5  
Similarity=0.446053 0  
TGGATTGAAATNNGATTANNCAGNNTTNAATGATTNNAATAATCNNTGTGCACTCCTTGTGAGTGCG

\*\*\*\*\*  
Consensus:

TGGATTGAAATNNGATTANNCAGNNTTNAATGATTNNAATAATCNNTGTGCACTCCTTGTGAGTGCG

>Bacillus\_Fam\_902\_67\_1 Nr. of seq. 1 Alignment length(with gaps) = 67  
Alignment score = 0.000000  
GCF\_000787375.1\_ASM78737v1\_genomic.fna\_72:8860-10166 Satlength=1307 Nr of  
Repeats=20 RepeatLength=66 seed=GTCATATCTC Num.seqs=13  
Similarity=0.412873  
0 GTCATATCTCCATCTAATCCGTTGCTGTGATATGATANNNGCNNTCANCANNTNGATGNTGNNAANN

\*\*\*\*\*  
Consensus:

GTCATATCTCCATCTAATCCGTTGCTGTGATATGATANNNGCNNTCANCANNTNGATGNTGNNAANN

>Bacillus\_Fam\_903\_67\_1 Nr. of seq. 1 Alignment length(with gaps) = 67  
Alignment score = 0.000000

GCF\_001375535.1\_Bacillus\_niameyensis\_genomic.fna\_6:2530174-2531360  
Satlength=1187 Nr of Repeats=18 RepeatLength=66 seed=AAAACTGAA  
Num.seqs=16 Similarity=0.346635  
AAAAACTGAAAGAGTGCCAAACTANGTTNANATNGTNCATNTTNTCNANANNGTTTTCTATACC

0

\*\*\*\*\*  
Consensus:

AAAAACTGAAAGAGTGCCAAACTANGTTNANATNGTNCATNTTNTCNANANNGTTTTCTATACC

>Bacillus\_Fam\_904\_67\_1 Nr. of seq. 1 Alignment length(with gaps) = 67  
Alignment score = 0.000000  
GCF\_001587375.1\_ASM158737v1\_genomic.fna\_53:71-465 Satlength=395 Nr of  
Repeats=6 RepeatLength=66 seed=GGTACTCTCT Num.seqs=4 Similarity=0.532724  
0 GGTACTCTCTCAGTTTTCGGTATAGAGAAACAAGTCCACGANTGTGNAAGANTACGATTNNGTTTT

\*\*\*\*\*  
Consensus:

GGTACTCTCTCAGTTTTCGGTATAGAGAAACAAGTCCACGANTGTGNAAGANTACGATTNNGTTTT

>Bacillus\_Fam\_905\_66\_1 Nr. of seq. 1 Alignment length(with gaps) = 66  
Alignment score = 0.000000  
GCF\_000017425.1\_ASM1742v1\_genomic.fna\_1:3154400-3155030 Satlength=631 Nr  
of Repeats=5 RepeatLength=66 seed=ATCTTTTGAT Num.seqs=3  
Similarity=0.905724  
0 ATCTTTTGATAATTCGTAGCCCGCTGGTGCTTCTATTTCAACGATTTTGTATTACCTATCGGTAA

\*\*\*\*\*  
Consensus:

ATCTTTTGATAATTCGTAGCCCGCTGGTGCTTCTATTTCAACGATTTTGTATTACCTATCGGTAA

>Bacillus\_Fam\_906\_66\_1 Nr. of seq. 1 Alignment length(with gaps) = 66  
Alignment score = 0.000000  
GCF\_000238675.1\_Baci\_smit\_7\_3\_47FAA\_V1\_genomic.fna\_17:14392-16174  
Satlength=1783 Nr of Repeats=27 RepeatLength=66 seed=ATCATATCAC  
Num.seqs=25 Similarity=0.325146  
ATCATATCACAGCAATAATCTTAGGGGAAGTATGACNGNTNNTNNGANNATNTNNGNTNNNNN

0

\*\*\*\*\*  
Consensus:

ATCATATCACAGCAATAATCTTAGGGGAAGTATGACNGNTNNTNNGANNATNTNNGNTNNNNN

>Bacillus\_Fam\_907\_66\_1 Nr. of seq. 1 Alignment length(with gaps) = 66  
Alignment score = 0.000000  
GCF\_000307855.1\_BAZO1.0\_genomic.fna\_92:44514-45037 Satlength=524 Nr of  
Repeats=8 RepeatLength=65 seed=GTCGCATCCC Num.seqs=5 Similarity=0.490909  
0 GTCGCATCCCACGCGGATGCGTGGATTGAAATGNCNANCATGNCGAGATANANCCGNANTCTNGN

\*\*\*\*\*  
Consensus:

GTCGCATCCCACGCGGATGCGTGGATTGAAATGNCNANCATGNCGAGATANANCCGNNANTCTNGN

>Bacillus\_Fam\_908\_66\_1 Nr. of seq. 1 Alignment length(with gaps) = 66  
Alignment score = 0.000000  
GCF\_000429705.1\_ASM42970v1\_genomic.fna\_2:243049-243709 Satlength=661 Nr  
of Repeats=10 RepeatLength=66 seed=GACAGCACCA Num.seqs=10  
Similarity=0.846016  
GACAGCACCAACGCTACTGATACTTCCACCGCTACAAGCGGCTCCACCAGCGAGTCCGACACG

0

\*\*\*\*\*  
Consensus:

GACAGCACCAACGCTACTGATACTTCCACCGCTACAAGCGGCTCCACCAGCGAGTCCGACACG

>Bacillus\_Fam\_909\_66\_1 Nr. of seq. 1 Alignment length(with gaps) = 66  
Alignment score = 0.000000  
GCF\_001274935.1\_ASM127493v1\_genomic.fna\_31:6009-6274 Satlength=266 Nr of  
Repeats=4 RepeatLength=66 seed=ATCATAATAC Num.seqs=3 Similarity=0.558559  
0 ATCATAATACAGCAATGGCTTTAATGGAAGTATGACNTACAAATGTANGANAAATATTNGATTNA

\*\*\*\*\*  
Consensus:

ATCATAATACAGCAATGGCTTTAATGGAAGTATGACNTACAAATGTANGANAAATATTNGATTNA

>Bacillus\_Fam\_910\_66\_1 Nr. of seq. 1 Alignment length(with gaps) = 66  
Alignment score = 0.000000  
GCF\_900096965.1\_IMG-  
taxon\_2671180223\_annotated\_assembly\_genomic.fna\_7:104929-105260  
Satlength=332 Nr of Repeats=5 RepeatLength=66 seed=GGATTGAAAT Num.seqs=3  
Similarity=0.470209 0  
GGATTGAAATNCGNTNGTATGCTNANNAGGTTGTTGGCNGNCGTCGCATCCCATGTGGGTGCGC

\*\*\*\*\*  
Consensus:

GGATTGAAATNCGNTNGTATGCTNANNAGGTTGTTGGCNGNCGTCGCATCCCATGTGGGTGCGC

>Bacillus\_Fam\_911\_66\_1 Nr. of seq. 1 Alignment length(with gaps) = 66  
Alignment score = 0.000000  
GCF\_900107275.1\_IMG-  
taxon\_2675903024\_annotated\_assembly\_genomic.fna\_49:6168-6961  
Satlength=794 Nr of Repeats=12 RepeatLength=66 seed=GTCGCACTCT  
Num.seqs=8 Similarity=0.424771 0  
GTCGCACTCTTCATGAGTGCGTGGATTGAAATNTTATANTCNTGATGGTCGAGNGCATNNGATCGN

\*\*\*\*\*  
Consensus:

GTCGCACTCTTCATGAGTGCGTGGATTGAAATNTTATANTCNTGATGGTCGAGNGCATNNGATCGN

>Bacillus\_Fam\_912\_65\_1 Nr. of seq. 1 Alignment length(with gaps) = 65  
Alignment score = 0.000000

GCF\_000374345.1\_ASM37434v1\_genomic.fna\_66:11358-11621 Satlength=264 Nr of Repeats=4 RepeatLength=66 seed=ATTTCAATCC Num.seqs=3 Similarity=0.460526  
0 ATTTCAATCCTCGCACTCACATGGAGTGC GACCANTAAGTCTATTNCTGTTATGCAAGANNGNCT

\*\*\*\*\*  
Consensus:

ATTTCAATCCTCGCACTCACATGGAGTGC GACCANTAAGTCTATTNCTGTTATGCAAGANNGNCT

>Bacillus\_Fam\_913\_65\_1 Nr. of seq. 1 Alignment length(with gaps) = 65  
Alignment score = 0.000000

GCF\_001484965.1\_ASM148496v1\_genomic.fna\_8:75646-77564 Satlength=1919 Nr of Repeats=29 RepeatLength=66 seed=TCCACGCACT Num.seqs=19  
Similarity=0.282332

TCCACGCACTCACATGGAGTGC GATTACGNCNNANNNATNNCGNNGANAACGTCNGANATTTCAA

\*\*\*\*\*  
Consensus:

TCCACGCACTCACATGGAGTGC GATTACGNCNNANNNATNNCGNNGANAACGTCNGANATTTCAA

>Bacillus\_Fam\_914\_65\_1 Nr. of seq. 1 Alignment length(with gaps) = 65  
Alignment score = 0.000000

GCF\_900142675.1\_IMG-  
taxon\_2654588196\_annotated\_assembly\_genomic.fna\_5:564317-564649  
Satlength=333 Nr of Repeats=5 RepeatLength=66 seed=GTCGCACTCT Num.seqs=3  
Similarity=0.526636

GTCGCACTCTTTGTGAGTGC GTGATTGAAATAANCATNTTTCTGTAANCGGCAAAATAATNCNG

\*\*\*\*\*  
Consensus:

GTCGCACTCTTTGTGAGTGC GTGATTGAAATAANCATNTTTCTGTAANCGGCAAAATAATNCNG

>Bacillus\_Fam\_915\_63\_1 Nr. of seq. 1 Alignment length(with gaps) = 63  
Alignment score = 0.000000

GCF\_000429705.1\_ASM42970v1\_genomic.fna\_3:200483-201166 Satlength=684 Nr of Repeats=8 RepeatLength=63 seed=TTTTTTCTAC Num.seqs=5  
Similarity=0.664646

0 TTTTTTCTACCGCAAAGAGAGATATTCCTACCACAAANAGCAATAATCCTACCGAAAATCCGA

\*\*\*\*\*  
Consensus:

TTTTTTCTACCGCAAAGAGAGATATTCCTACCACAAANAGCAATAATCCTACCGAAAATCCGA

>Bacillus\_Fam\_916\_63\_1 Nr. of seq. 1 Alignment length(with gaps) = 63  
Alignment score = 0.000000

GCF\_000430785.1\_ASM43078v1\_genomic.fna\_32:20641-20977 Satlength=337 Nr of Repeats=5 RepeatLength=63 seed=CAAGAAATAG Num.seqs=4 Similarity=0.915344  
0 CAAGAAATAGAAAATTTAAATGAAACAATCATCAGTTACAAAACAAAAGAACTGAACATAAA

\*\*\*\*\*  
Consensus:

CAAGAAATAGAAAATTTAAATGAAACAATCATCAGTTACAAAACAAAAGAACTGAACATAAA

>Bacillus\_Fam\_917\_63\_1 Nr. of seq. 1 Alignment length(with gaps) = 63  
Alignment score = 0.000000  
GCF\_000508325.1\_BAVI\_1\_genomic.fna\_19:13794-14166 Satlength=373 Nr of  
Repeats=4 RepeatLength=63 seed=AATACCATTT Num.seqs=3 Similarity=0.823633  
0 AATACCATTTTNCNCCNGATTGAACCCATGCTTTTGTACCATAGCTCCATCAGCACCTAAGT

\*\*\*\*\*  
Consensus:

AATACCATTTTNCNCCNGATTGAACCCATGCTTTTGTACCATAGCTCCATCAGCACCTAAGT

>Bacillus\_Fam\_918\_63\_1 Nr. of seq. 1 Alignment length(with gaps) = 63  
Alignment score = 0.000000  
GCF\_000751775.1\_A1A\_genomic.fna\_22:47265-47558 Satlength=294 Nr of  
Repeats=5 RepeatLength=63 seed=TTTGTCCCAT Num.seqs=3 Similarity=0.887125  
0 TTTGTCCCATAGACCGTGAATCCGGAATTCTATGGGACATTTTATTTTACTTTTCAACTAAA

\*\*\*\*\*  
Consensus:

TTTGTCCCATAGACCGTGAATCCGGAATTCTATGGGACATTTTATTTTACTTTTCAACTAAA

>Bacillus\_Fam\_919\_63\_1 Nr. of seq. 1 Alignment length(with gaps) = 63  
Alignment score = 0.000000  
GCF\_001274935.1\_ASM127493v1\_genomic.fna\_16:22732-23194 Satlength=463 Nr of  
Repeats=5 RepeatLength=63 seed=TAGGAAAACCT Num.seqs=4  
Similarity=0.841270  
0 TAGGAAAACCTATCTGACGGATCTACTCAGCTAGCAACAGGAAAAGGCGATTTATCAAATGGTT

\*\*\*\*\*  
Consensus:

TAGGAAAACCTATCTGACGGATCTACTCAGCTAGCAACAGGAAAAGGCGATTTATCAAATGGTT

>Bacillus\_Fam\_920\_63\_1 Nr. of seq. 1 Alignment length(with gaps) = 63  
Alignment score = 0.000000  
GCF\_001587375.1\_ASM158737v1\_genomic.fna\_12:70-2906 Satlength=2837 Nr of  
Repeats=44 RepeatLength=66 seed=AGAGTACCAA Num.seqs=38  
Similarity=0.266813  
0 AGAGTACCAAAACNTNNNNANANNNNTNNGNTANTANGTNGTTTCTCTATACCGAAAACCTGAG

\*\*\*\*\*  
Consensus:

AGAGTACCAAAACNTNNNNANANNNNTNNGNTANTANGTNGTTTCTCTATACCGAAAACCTGAG

>Bacillus\_Fam\_921\_63\_1 Nr. of seq. 1 Alignment length(with gaps) = 63  
Alignment score = 0.000000  
GCF\_002019595.1\_ASM201959v1\_genomic.fna\_1:3679532-3679910 Satlength=379  
Nr of Repeats=6 RepeatLength=63 seed=GAAAAAGAGC Num.seqs=6

```

Similarity=0.646875
GAAAAAGAGCAGCAAGCCAGNCTTACCATCCAAGAGCTGGAGAACAAAATCCAACACTCTTTG

*****
Consensus:

GAAAAAGAGCAGCAAGCCAGNCTTACCATCCAAGAGCTGGAGAACAAAATCCAACACTCTTTG

>Bacillus_Fam_922_62_1 Nr. of seq. 1 Alignment length(with gaps) = 62
Alignment score = 0.000000
GCF_000374345.1_ASM37434v1_genomic.fna_18:23841-24079 Satlength=239 Nr of
Repeats=4 RepeatLength=62 seed=ATGAAAGCCA Num.seqs=3 Similarity=0.600694
0 ATGAAAGCCATNATGAAGGAAAAACGCGGGTNAANTNGCTTTCATCTGTAAAAAAGATCCAA

*****
Consensus:

ATGAAAGCCATNATGAAGGAAAAACGCGGGTNAANTNGCTTTCATCTGTAAAAAAGATCCAA

>Bacillus_Fam_923_61_1 Nr. of seq. 1 Alignment length(with gaps) = 61
Alignment score = 0.000000
GCF_001645685.2_ASM164568v2_genomic.fna_1:1321762-1322553 Satlength=792
Nr of Repeats=13 RepeatLength=61 seed=AATCGAAACA Num.seqs=11
Similarity=0.861302
0 AATCGAAACAAGGACGAAATACTCCAATGTAGGCCGAATTAATAGCAGTCAAGGCCGGATT

*****
Consensus:

AATCGAAACAAGGACGAAATACTCCAATGTAGGCCGAATTAATAGCAGTCAAGGCCGGATT

>Bacillus_Fam_924_60_1 Nr. of seq. 1 Alignment length(with gaps) = 60
Alignment score = 0.000000
GCF_000161455.1_ASM16145v1_genomic.fna_1:1619478-1620237 Satlength=760 Nr
of Repeats=7 RepeatLength=60 seed=AATACCAAGT Num.seqs=5
Similarity=0.661376
0 AATACCAAGTAGATCCTTCTTTTAACCAGCCAGTAGCCATAGAACCATTTGCATTTAGAT

*****
Consensus:

AATACCAAGTAGATCCTTCTTTTAACCAGCCAGTAGCCATAGAACCATTTGCATTTAGAT

>Bacillus_Fam_925_60_1 Nr. of seq. 1 Alignment length(with gaps) = 60
Alignment score = 0.000000
GCF_000496285.1_ASM49628v1_genomic.fna_1:3811091-3811391 Satlength=301 Nr
of Repeats=4 RepeatLength=60 seed=TGGTATTACT Num.seqs=3
Similarity=0.644444
0 TGGTATTACTTGAAAGAAAATGGATCNATGATGACAGGTTGGACGTTAGTAAATGGTNAG

*****
Consensus:

TGGTATTACTTGAAAGAAAATGGATCNATGATGACAGGTTGGACGTTAGTAAATGGTNAG

```



>Bacillus\_Fam\_926\_60\_1 Nr. of seq. 1 Alignment length(with gaps) = 60  
Alignment score = 0.000000  
GCF\_000496285.1\_ASM49628v1\_genomic.fna\_1:3813346-3813826 Satlength=481 Nr of Repeats=7 RepeatLength=60 seed=TGGTATTATT Num.seqs=6  
Similarity=0.575788 0  
TGGTATTATTTTAAACGCTAATGGAGCAATGAAAACGGGCTGGCTATTANATCAAGGAGTT

\*\*\*\*\*  
Consensus:

TGGTATTATTTTAAACGCTAATGGAGCAATGAAAACGGGCTGGCTATTANATCAAGGAGTT

>Bacillus\_Fam\_927\_60\_1 Nr. of seq. 1 Alignment length(with gaps) = 60  
Alignment score = 0.000000  
GCF\_000712595.1\_ASM71259v1\_genomic.fna\_18:41788-42208 Satlength=421 Nr of Repeats=7 RepeatLength=60 seed=TAGTACCAAG Num.seqs=7 Similarity=0.572161  
0 TAGTACCAAGTATTANCAAGNTGAAGCCATCCNGTATGCATNNCACCGTTATTNTTTAAN

\*\*\*\*\*  
Consensus:

TAGTACCAAGTATTANCAAGNTGAAGCCATCCNGTATGCATNNCACCGTTATTNTTTAAN

>Bacillus\_Fam\_928\_60\_1 Nr. of seq. 1 Alignment length(with gaps) = 60  
Alignment score = 0.000000  
GCF\_000712615.1\_ASM71261v1\_genomic.fna\_59:11461-11761 Satlength=301 Nr of Repeats=5 RepeatLength=60 seed=ATTTACATTT Num.seqs=5 Similarity=0.769312  
0 ATTTACATTTTTCTTACATTCACTCTCTTGATACCCCTTGCTTTTACCTCATCCTTTGA

\*\*\*\*\*  
Consensus:

ATTTACATTTTTCTTACATTCACTCTCTTGATACCCCTTGCTTTTACCTCATCCTTTGA

>Bacillus\_Fam\_929\_60\_1 Nr. of seq. 1 Alignment length(with gaps) = 60  
Alignment score = 0.000000  
GCF\_000832605.1\_ASM83260v1\_genomic.fna\_2:284188-284428 Satlength=241 Nr of Repeats=4 RepeatLength=60 seed=ATCACAACAC Num.seqs=4  
Similarity=0.933333  
0 ATCACAACACCACAGTCAGGAACAACACCATCACCAGCGAATCCGATGGAAAGTAAGCCA

\*\*\*\*\*  
Consensus:

ATCACAACACCACAGTCAGGAACAACACCATCACCAGCGAATCCGATGGAAAGTAAGCCA

>Bacillus\_Fam\_930\_60\_1 Nr. of seq. 1 Alignment length(with gaps) = 60  
Alignment score = 0.000000  
GCF\_001439915.1\_ASM143991v1\_genomic.fna\_105:204636-204873 Satlength=238  
Nr of Repeats=4 RepeatLength=60 seed=CCCAACCACT Num.seqs=3  
Similarity=0.664903 0  
CCCAACCACTAGCCATCGCACCCTAGGATGCATGAAGTACCAGGTGCTCCCATCNNNTA

\*\*\*\*\*

Consensus:

CCCAACCAGTAGCCATCGCACCCTAGGATGCATGAAGTACCAGGTGCTCCCATCENNNTA

>Bacillus\_Fam\_931\_60\_1 Nr. of seq. 1 Alignment length(with gaps) = 60

Alignment score = 0.000000

GCF\_001591485.1\_ASM159148v1\_genomic.fna\_100:1375-1615 Satlength=241 Nr of  
Repeats=4 RepeatLength=60 seed=AGGTAGTACC Num.seqs=4 Similarity=0.685792  
0 AGGTAGTACCCTTCCCACCTGTATAAAGCCAACCGGTCTTCATCGAGCCATTACTAGTC

\*\*\*\*\*

Consensus:

AGGTAGTACCCTTCCCACCTGTATAAAGCCAACCGGTCTTCATCGAGCCATTACTAGTC

>Bacillus\_Fam\_932\_60\_1 Nr. of seq. 1 Alignment length(with gaps) = 60

Alignment score = 0.000000

GCF\_001591485.1\_ASM159148v1\_genomic.fna\_130:5865-6531 Satlength=667 Nr of  
Repeats=5 RepeatLength=60 seed=TCAGCCAGCC Num.seqs=3 Similarity=0.336650  
0 TCAGCCAGCCNTTNTGAATNAGACCGTTTGATNCAAAGTAATANTGCTNNNATCCCTNGG

\*\*\*\*\*

Consensus:

TCAGCCAGCCNTTNTGAATNAGACCGTTTGATNCAAAGTAATANTGCTNNNATCCCTNGG

>Bacillus\_Fam\_933\_60\_1 Nr. of seq. 1 Alignment length(with gaps) = 60

Alignment score = 0.000000

GCF\_001591805.1\_ASM159180v1\_genomic.fna\_49:31667-31967 Satlength=301 Nr  
of Repeats=5 RepeatLength=60 seed=AAGAGCGGAG Num.seqs=3  
Similarity=0.911111  
0 AAGAGCGGAGCCATGCAAACGGGCTGGCTGAAAGACGGATCGAAATGGTACTACCTCGGT

\*\*\*\*\*

Consensus:

AAGAGCGGAGCCATGCAAACGGGCTGGCTGAAAGACGGATCGAAATGGTACTACCTCGGT

>Bacillus\_Fam\_934\_60\_1 Nr. of seq. 1 Alignment length(with gaps) = 60

Alignment score = 0.000000

GCF\_001712755.1\_ASM171275v1\_genomic.fna\_3:55980-56220 Satlength=241 Nr of  
Repeats=4 RepeatLength=60 seed=GGAGTAATGA Num.seqs=4 Similarity=0.769841  
0 GGAGTAATGAAACTAGTTGGTTAGTATTAGGTAATAAACATTATTACTTTGATAAATAT

\*\*\*\*\*

Consensus:

GGAGTAATGAAACTAGTTGGTTAGTATTAGGTAATAAACATTATTACTTTGATAAATAT

>Bacillus\_Fam\_935\_60\_1 Nr. of seq. 1 Alignment length(with gaps) = 60

Alignment score = 0.000000

GCF\_900109925.1\_IMG-  
taxon\_2651870116\_annotated\_assembly\_genomic.fna\_16:475148-475388  
Satlength=241 Nr of Repeats=4 RepeatLength=60 seed=TGACGGTAGC Num.seqs=4  
Similarity=0.933333 0  
TGACGGTAGCCATGAGGAGGCAGGACATGAAGACGAAAATCATGAAGCTGACGCTCATGG

\*\*\*\*\*  
Consensus:

TGACGGTAGCCATGAGGAGGCAGGACATGAAGACGAAAATCATGAAGCTGACGCTCATGG

>Bacillus\_Fam\_936\_58\_1 Nr. of seq. 1 Alignment length(with gaps) = 58  
Alignment score = 0.000000  
GCF\_001591485.1\_ASM159148v1\_genomic.fna\_14:19820-20120 Satlength=301 Nr  
of Repeats=5 RepeatLength=60 seed=TGGTATTATT Num.seqs=5  
Similarity=0.504040  
0 TGGTATTATTTTGATNNNACCGGTGCAATGAAAACAGGNTGGCTGCTATNGTGGCAAN

\*\*\*\*\*  
Consensus:

TGGTATTATTTTGATNNNACCGGTGCAATGAAAACAGGNTGGCTGCTATNGTGGCAAN

>Bacillus\_Fam\_937\_58\_1 Nr. of seq. 1 Alignment length(with gaps) = 58  
Alignment score = 0.000000  
GCF\_900107275.1\_IMG-  
taxon\_2675903024\_annotated\_assembly\_genomic.fna\_42:885338-885570  
Satlength=233 Nr of Repeats=4 RepeatLength=58 seed=AGGATGGCGA Num.seqs=4  
Similarity=1.000000 0  
AGGATGGCGACATTCCGCTGTTACTCACAGGACGTGAGTGGTACTTAAGCGGAATTGG

\*\*\*\*\*  
Consensus:

AGGATGGCGACATTCCGCTGTTACTCACAGGACGTGAGTGGTACTTAAGCGGAATTGG

>Bacillus\_Fam\_938\_57\_1 Nr. of seq. 1 Alignment length(with gaps) = 57  
Alignment score = 0.000000  
GCF\_000292245.2\_ASM29224v2\_genomic.fna\_16:66119-66404 Satlength=286 Nr of  
Repeats=5 RepeatLength=57 seed=TTTCCAATGC Num.seqs=5 Similarity=0.887719  
0 TTTCCAATGCCAAGCCACCATGGAGGAATGATGCCAATGCCAGAGCAAAGTGGAGGA

\*\*\*\*\*  
Consensus:

TTTCCAATGCCAAGCCACCATGGAGGAATGATGCCAATGCCAGAGCAAAGTGGAGGA

>Bacillus\_Fam\_939\_57\_1 Nr. of seq. 1 Alignment length(with gaps) = 57  
Alignment score = 0.000000  
GCF\_000321185.1\_ASM32118v1\_genomic.fna\_73:59292-59609 Satlength=318 Nr of  
Repeats=5 RepeatLength=57 seed=AATGACTCAT Num.seqs=3 Similarity=0.953216  
0 AATGACTCATAAATACTCGATTCTTTTTTATCATGGATTCTTCAGCTGGTCTTATT

\*\*\*\*\*

Consensus:

AATGACTCATAAATACTCGATTCTTTTTTATCATGGATTCTTCAGCTGGTCTTATT

>Bacillus\_Fam\_940\_57\_1 Nr. of seq. 1 Alignment length(with gaps) = 57  
Alignment score = 0.000000  
GCF\_000712615.1\_ASM71261v1\_genomic.fna\_6:87271-88026 Satlength=756 Nr of  
Repeats=7 RepeatLength=57 seed=CAAATGTTGG Num.seqs=5 Similarity=0.985965  
0 CAAATGTTGGAAATGTAGTTGGTGCTCCTACTGGAACCTCCGCCTTGCGCCCCCTCCTA

\*\*\*\*\*

Consensus:

CAAATGTTGGAAATGTAGTTGGTGCTCCTACTGGAACCTCCGCCTTGCGCCCCCTCCTA

>Bacillus\_Fam\_941\_57\_1 Nr. of seq. 1 Alignment length(with gaps) = 57  
Alignment score = 0.000000  
GCF\_000775975.1\_ASM77597v1\_genomic.fna\_1:2705156-2705429 Satlength=274 Nr  
of Repeats=6 RepeatLength=57 seed=GGGCCTACTG Num.seqs=4  
Similarity=0.910331 0  
GGGCCTACTGGACCTACCGGAATAACTGGAGCAACTGGACCTTCTGGTGGACCTCCA

\*\*\*\*\*

Consensus:

GGGCCTACTGGACCTACCGGAATAACTGGAGCAACTGGACCTTCTGGTGGACCTCCA

>Bacillus\_Fam\_942\_56\_1 Nr. of seq. 1 Alignment length(with gaps) = 56  
Alignment score = 0.000000  
GCF\_001587375.1\_ASM158737v1\_genomic.fna\_120:58369-58681 Satlength=313 Nr  
of Repeats=6 RepeatLength=52 seed=TTTGGAGGTA Num.seqs=4  
Similarity=0.625000  
0 TTTGGAGGTACTTCCTTTTAGCTATTCGCTAGCATGATGTGACNTCATGACACTCT

\*\*\*\*\*

Consensus:

TTTGGAGGTACTTCCTTTTAGCTATTCGCTAGCATGATGTGACNTCATGACACTCT

>Bacillus\_Fam\_943\_55\_1 Nr. of seq. 1 Alignment length(with gaps) = 55  
Alignment score = 0.000000  
GCF\_000217835.1\_ASM21783v1\_genomic.fna\_1:697043-697355 Satlength=313 Nr  
of Repeats=6 RepeatLength=52 seed=GTCTTCCTTA Num.seqs=6  
Similarity=0.674206  
0 GTCTTCCTTAACNTAGANGCGNTTCTACGTTAAGATACCCGAAAAATTCCGANG

\*\*\*\*\*

Consensus:

GTCTTCCTTAACNTAGANGCGNTTCTACGTTAAGATACCCGAAAAATTCCGANG

>Bacillus\_Fam\_944\_55\_1 Nr. of seq. 1 Alignment length(with gaps) = 55  
Alignment score = 0.000000

GCF\_000331575.1\_ASM33157v1\_genomic.fna\_1:1650370-1650647 Satlength=278 Nr  
of Repeats=5 RepeatLength=55 seed=GGACCATGAT Num.seqs=3  
Similarity=0.903030 0  
GGACCATGATTAAGCTGCTATTTGTTGGTAGTTTTATACATAGCACTTGATTTCGC

\*\*\*\*\*  
Consensus:

GGACCATGATTAAGCTGCTATTTGTTGGTAGTTTTATACATAGCACTTGATTTCGC

>Bacillus\_Fam\_945\_55\_1 Nr. of seq. 1 Alignment length(with gaps) = 55  
Alignment score = 0.000000  
GCF\_001420715.1\_ASM142071v1\_genomic.fna\_22:511669-512190 Satlength=522 Nr  
of Repeats=11 RepeatLength=52 seed=ATGAAGGACA Num.seqs=8  
Similarity=0.624362 0  
ATGAAGGACAANTTGAAGGAAAGAATCGAAGGAAAATCAGTCCTTCATCGGAAGT

\*\*\*\*\*  
Consensus:

ATGAAGGACAANTTGAAGGAAAGAATCGAAGGAAAATCAGTCCTTCATCGGAAGT

>Bacillus\_Fam\_946\_55\_1 Nr. of seq. 1 Alignment length(with gaps) = 55  
Alignment score = 0.000000  
GCF\_001636315.1\_ASM163631v1\_genomic.fna\_1:1907579-1907897 Satlength=319  
Nr of Repeats=6 RepeatLength=53 seed=CTTTATTTTG Num.seqs=6  
Similarity=0.823434 0  
CTTTATTTTGACCGGTGACCTCCTTCTTGGTACCTTTGCGGGAAGAATCNGACGN

\*\*\*\*\*  
Consensus:

CTTTATTTTGACCGGTGACCTCCTTCTTGGTACCTTTGCGGGAAGAATCNGACGN

>Bacillus\_Fam\_947\_55\_1 Nr. of seq. 1 Alignment length(with gaps) = 55  
Alignment score = 0.000000  
GCF\_001636315.1\_ASM163631v1\_genomic.fna\_1:2333462-2333670 Satlength=209  
Nr of Repeats=4 RepeatLength=52 seed=CTCATGAACC Num.seqs=4  
Similarity=0.606061 0  
CTCATGAACCCTCTATGAGAACAATTGCNAGCACCTCCTTCANCCAGTCTGTC

\*\*\*\*\*  
Consensus:

CTCATGAACCCTCTATGAGAACAATTGCNAGCACCTCCTTCANCCAGTCTGTC

>Bacillus\_Fam\_948\_54\_1 Nr. of seq. 1 Alignment length(with gaps) = 54  
Alignment score = 0.000000  
GCF\_000169195.2\_ASM16919v2\_genomic.fna\_1:140555-140771 Satlength=217 Nr  
of Repeats=4 RepeatLength=54 seed=CCCGTCTTTC Num.seqs=4  
Similarity=0.786008  
0 CCCGTCTTTCAGCATGATGTTTCAGGCAAATCCGGGGGAACACGGCGCTCTATTT

\*\*\*\*\*

Consensus:

CCCGTCTTTCAGCATGATGTTTCAGGCAAATCCGGGGGAACACGGCGCTCTATTT

>Bacillus\_Fam\_949\_54\_1 Nr. of seq. 1 Alignment length(with gaps) = 54  
Alignment score = 0.000000  
GCF\_000169195.2\_ASM16919v2\_genomic.fna\_1:451571-451779 Satlength=209 Nr  
of Repeats=4 RepeatLength=52 seed=TGTCCTTTCAT Num.seqs=4  
Similarity=0.507937  
0 TGTCTTTCATCANACCGATGAAGGACAAATAGCTACCAGCCACNCCTTGTA AAA

\*\*\*\*\*

Consensus:

TGTCTTTCATCANACCGATGAAGGACAAATAGCTACCAGCCACNCCTTGTA AAA

>Bacillus\_Fam\_950\_54\_1 Nr. of seq. 1 Alignment length(with gaps) = 54  
Alignment score = 0.000000  
GCF\_000708755.2\_ASM70875v2\_genomic.fna\_2:1546077-1546501 Satlength=425 Nr  
of Repeats=8 RepeatLength=53 seed=TTTCAGTGCCA Num.seqs=8  
Similarity=0.784832  
0  
TTTCAGTGCCATCAAAACCGATTCCGGACGCTTCTTGAGGGTTCTTATCCTGNTG

\*\*\*\*\*

Consensus:

TTTCAGTGCCATCAAAACCGATTCCGGACGCTTCTTGAGGGTTCTTATCCTGNTG

>Bacillus\_Fam\_951\_54\_1 Nr. of seq. 1 Alignment length(with gaps) = 54  
Alignment score = 0.000000  
GCF\_000712595.1\_ASM71259v1\_genomic.fna\_14:27849-28929 Satlength=1081 Nr  
of Repeats=20 RepeatLength=54 seed=ACAAAGACTT Num.seqs=20  
Similarity=0.765132  
0  
ACAAAGACTTCCGGCTCTTCTTGGNTTTCCTCTACAACCTTCTGCTTCAGGTTCC

\*\*\*\*\*

Consensus:

ACAAAGACTTCCGGCTCTTCTTGGNTTTCCTCTACAACCTTCTGCTTCAGGTTCC

>Bacillus\_Fam\_952\_54\_1 Nr. of seq. 1 Alignment length(with gaps) = 54  
Alignment score = 0.000000  
GCF\_000712615.1\_ASM71261v1\_genomic.fna\_77:5423-5639 Satlength=217 Nr of  
Repeats=4 RepeatLength=54 seed=ATTGTTGGAA Num.seqs=4 Similarity=0.897119  
0 ATTGTTGGAAACACAAACATCACGATGATTGTTCAAAACATAAACATCATTGTG

\*\*\*\*\*

Consensus:

ATTGTTGGAAACACAAACATCACGATGATTGTTCAAAACATAAACATCATTGTG

>Bacillus\_Fam\_953\_54\_1 Nr. of seq. 1 Alignment length(with gaps) = 54  
Alignment score = 0.000000

GCF\_000775975.1\_ASM77597v1\_genomic.fna\_1:2007949-2008246 Satlength=298 Nr  
of Repeats=6 RepeatLength=54 seed=AGAGAAAAGAA Num.seqs=5  
Similarity=0.690476 0  
AGAGAAAAGAAAGTGAAGAACTGAATCAAAAAAGAAGATAAAGCAATTGAATT

\*\*\*\*\*  
Consensus:

AGAGAAAAGAAAGTGAAGAACTGAATCAAAAAAGAAGATAAAGCAATTGAATT

>Bacillus\_Fam\_954\_54\_1 Nr. of seq. 1 Alignment length(with gaps) = 54  
Alignment score = 0.000000  
GCF\_000986785.1\_ASM98678v1\_genomic.fna\_101:238687-238999 Satlength=313 Nr  
of Repeats=5 RepeatLength=52 seed=CTGACAGCCC Num.seqs=4  
Similarity=0.763375 0  
CTGACAGCCCTCCTCAGTGCCCGTTTCTTGGAATAGGAAACCATTTTAGGGCT

\*\*\*\*\*  
Consensus:

CTGACAGCCCTCCTCAGTGCCCGTTTCTTGGAATAGGAAACCATTTTAGGGCT

>Bacillus\_Fam\_955\_54\_1 Nr. of seq. 1 Alignment length(with gaps) = 54  
Alignment score = 0.000000  
GCF\_001243895.1\_Bacillus\_testis\_genomic.fna\_9:434776-435244 Satlength=469  
Nr of Repeats=5 RepeatLength=54 seed=ATGGGGCCAA Num.seqs=4  
Similarity=0.864198 0  
ATGGGGCCAAACAGGAGCCACCGATTAGCAGGAGCAACCGGGCCAGCAGGAGTA

\*\*\*\*\*  
Consensus:

ATGGGGCCAAACAGGAGCCACCGATTAGCAGGAGCAACCGGGCCAGCAGGAGTA

>Bacillus\_Fam\_956\_54\_1 Nr. of seq. 1 Alignment length(with gaps) = 54  
Alignment score = 0.000000  
GCF\_001375535.1\_Bacillus\_niameyensis\_genomic.fna\_6:201591-201847  
Satlength=257 Nr of Repeats=5 RepeatLength=51 seed=TTTGTCTCTG Num.seqs=4  
Similarity=0.598765 0  
TTTGTCTCTGAGCACGTCTATCAGAGACATTAATTATCCAATTAAAAGCGAAGA

\*\*\*\*\*  
Consensus:

TTTGTCTCTGAGCACGTCTATCAGAGACATTAATTATCCAATTAAAAGCGAAGA

>Bacillus\_Fam\_957\_54\_1 Nr. of seq. 1 Alignment length(with gaps) = 54  
Alignment score = 0.000000  
GCF\_002019705.1\_ASM201970v1\_genomic.fna\_1:3847198-3848008 Satlength=811  
Nr of Repeats=14 RepeatLength=54 seed=TAAGCCAGTA Num.seqs=9  
Similarity=1.000000 0  
TAAGCCAGTAGCGCCAGTAGGCCAGGATCGCCGGTGGCCCCAGTAGCCCCAGC

\*\*\*\*\*

Consensus:

TAAGCCAGTAGCGCCAGTAGGCCAGGATCGCCGGTGGCCCCAGTAGCCCCAGC

>Bacillus\_Fam\_958\_54\_1 Nr. of seq. 1 Alignment length(with gaps) = 54  
Alignment score = 0.000000  
GCF\_900107275.1\_IMG-  
taxon\_2675903024\_annotated\_assembly\_genomic.fna\_32:122431-122863  
Satlength=433 Nr of Repeats=8 RepeatLength=54 seed=CTCAGCCAGC Num.seqs=8  
Similarity=0.973545 0  
CTCAGCCAGCAGCTCGGTTTCTTCTGCAGCCTCTTCGAGTAATTCTGTCTCATT

\*\*\*\*\*  
Consensus:

CTCAGCCAGCAGCTCGGTTTCTTCTGCAGCCTCTTCGAGTAATTCTGTCTCATT

>Bacillus\_Fam\_959\_54\_1 Nr. of seq. 1 Alignment length(with gaps) = 54  
Alignment score = 0.000000  
GCF\_900109925.1\_IMG-  
taxon\_2651870116\_annotated\_assembly\_genomic.fna\_26:45696-46032  
Satlength=337 Nr of Repeats=4 RepeatLength=54 seed=AAAGCAGAAG Num.seqs=3  
Similarity=0.983539 0  
AAAGCAGAAGAGCAACAGCGTGAAGCATTGAAGAAACAAGAAGAGGCCCGTAAA

\*\*\*\*\*  
Consensus:

AAAGCAGAAGAGCAACAGCGTGAAGCATTGAAGAAACAAGAAGAGGCCCGTAAA

>Bacillus\_Fam\_960\_53\_1 Nr. of seq. 1 Alignment length(with gaps) = 53  
Alignment score = 0.000000  
BACILLUS\_PSEUDALCALIPHILUS\_genomic.fna\_3:207312-207737 Satlength=426 Nr of  
Repeats=8 RepeatLength=53 seed=GGTCGACATG Num.seqs=7 Similarity=0.892183  
0 GGTTCGACATGATCGAGGAGAAAATAGAGAAAGAACAGGTCGATGAGTAGCCGA

\*\*\*\*\*  
Consensus:

GGTCGACATGATCGAGGAGAAAATAGAGAAAGAACAGGTCGATGAGTAGCCGA

>Bacillus\_Fam\_961\_53\_1 Nr. of seq. 1 Alignment length(with gaps) = 53  
Alignment score = 0.000000  
GCF\_000153365.1\_ASM15336v1\_genomic.fna\_16:88973-89184 Satlength=212 Nr of  
Repeats=4 RepeatLength=53 seed=ATATGAGTCA Num.seqs=3 Similarity=0.740042  
0 ATATGAGTCACTNTGGTGGTGGNGAAAGCCGNACAGAGTGACTCAAGAGGAAG

\*\*\*\*\*  
Consensus:

ATATGAGTCACTNTGGTGGTGGNGAAAGCCGNACAGAGTGACTCAAGAGGAAG

>Bacillus\_Fam\_962\_53\_1 Nr. of seq. 1 Alignment length(with gaps) = 53  
Alignment score = 0.000000



GCF\_000169195.2\_ASM16919v2\_genomic.fna\_1:2227978-2228290 Satlength=313 Nr of Repeats=6 RepeatLength=52 seed=GCTTCCTTAA Num.seqs=6 Similarity=0.792243 0  
GCTTCCTTAACATAGAAGCGCTCTACATTAAGGAAAGGCGAAAATTCGTGACN

\*\*\*\*\*  
Consensus:

GCTTCCTTAACATAGAAGCGCTCTACATTAAGGAAAGGCGAAAATTCGTGACN

>Bacillus\_Fam\_963\_53\_1 Nr. of seq. 1 Alignment length(with gaps) = 53  
Alignment score = 0.000000  
GCF\_000181495.1\_ASM18149v1\_genomic.fna\_71:4024-4448 Satlength=425 Nr of Repeats=8 RepeatLength=53 seed=GAATCGGTAG Num.seqs=8 Similarity=0.919137  
0 GAATCGGTAGGGTCAAAAGAGCACTTAGACATGGTCTGAATCCAGGTAAGAGAA

\*\*\*\*\*  
Consensus:

GAATCGGTAGGGTCAAAAGAGCACTTAGACATGGTCTGAATCCAGGTAAGAGAA

>Bacillus\_Fam\_964\_53\_1 Nr. of seq. 1 Alignment length(with gaps) = 53  
Alignment score = 0.000000  
GCF\_000181495.1\_ASM18149v1\_genomic.fna\_89:2084-2402 Satlength=319 Nr of Repeats=6 RepeatLength=53 seed=GTAGGTCATA Num.seqs=6 Similarity=0.932914  
0 GTAGGTCATAAGGGTCTCAACATGAAAATGAAGCCATGCGCTCGTCCCGCGCG

\*\*\*\*\*  
Consensus:

GTAGGTCATAAGGGTCTCAACATGAAAATGAAGCCATGCGCTCGTCCCGCGCG

>Bacillus\_Fam\_965\_53\_1 Nr. of seq. 1 Alignment length(with gaps) = 53  
Alignment score = 0.000000  
GCF\_000181495.1\_ASM18149v1\_genomic.fna\_99:4910-5176 Satlength=267 Nr of Repeats=4 RepeatLength=53 seed=TCTCAATGGG Num.seqs=3 Similarity=0.829218  
0 TCTCAATGGGCTAATTACGTCGTTTACGGGCCAACACCTCATCAAAAAGTCAA

\*\*\*\*\*  
Consensus:

TCTCAATGGGCTAATTACGTCGTTTACGGGCCAACACCTCATCAAAAAGTCAA

>Bacillus\_Fam\_966\_53\_1 Nr. of seq. 1 Alignment length(with gaps) = 53  
Alignment score = 0.000000  
GCF\_000181495.1\_ASM18149v1\_genomic.fna\_130:505-717 Satlength=213 Nr of Repeats=4 RepeatLength=53 seed=TACATGAGTT Num.seqs=4 Similarity=0.689727  
0 TACATGAGTTACTTCAGATGGTCCGACTCATGTATGAAAACTNGATCNTTGA

\*\*\*\*\*  
Consensus:

TACATGAGTTACTTCAGATGGTCCGACTCATGTATGAAAACTNGATCNTTGA

>Bacillus\_Fam\_967\_53\_1 Nr. of seq. 1 Alignment length(with gaps) = 53  
Alignment score = 0.000000  
GCF\_000181495.1\_ASM18149v1\_genomic.fna\_138:4971-5501 Satlength=531 Nr of  
Repeats=10 RepeatLength=53 seed=GTCCCTTTGA Num.seqs=10  
Similarity=0.877009  
0 GTCCCTTTGACGACTCCGATTCTCCCTGACTTCCGATTCCACACCCTCATTGA

\*\*\*\*\*  
Consensus:

GTCCCTTTGACGACTCCGATTCTCCCTGACTTCCGATTCCACACCCTCATTGA

>Bacillus\_Fam\_968\_53\_1 Nr. of seq. 1 Alignment length(with gaps) = 53  
Alignment score = 0.000000  
GCF\_000181495.1\_ASM18149v1\_genomic.fna\_140:18323-18531 Satlength=209 Nr  
of Repeats=4 RepeatLength=52 seed=CTAAAGACCA Num.seqs=4  
Similarity=0.901468  
0 CTAAAGACCAAAACGAATGAAATTCCAGGTGTAAAAGTGTCTTTAGAGACGTT

\*\*\*\*\*  
Consensus:

CTAAAGACCAAAACGAATGAAATTCCAGGTGTAAAAGTGTCTTTAGAGACGTT

>Bacillus\_Fam\_969\_53\_1 Nr. of seq. 1 Alignment length(with gaps) = 53  
Alignment score = 0.000000  
GCF\_000181495.1\_ASM18149v1\_genomic.fna\_141:950-1213 Satlength=264 Nr of  
Repeats=5 RepeatLength=53 seed=AAAGGGTGTA Num.seqs=4 Similarity=0.916143  
0 AAAGGGTGTAACGGGCCAACGAGAAAGCAGAACCAGAAGGATGCTGGCCCCG

\*\*\*\*\*  
Consensus:

AAAGGGTGTAACGGGCCAACGAGAAAGCAGAACCAGAAGGATGCTGGCCCCG

>Bacillus\_Fam\_970\_53\_1 Nr. of seq. 1 Alignment length(with gaps) = 53  
Alignment score = 0.000000  
GCF\_000181495.1\_ASM18149v1\_genomic.fna\_150:24659-25400 Satlength=742 Nr  
of Repeats=14 RepeatLength=53 seed=CATCAAAAGG Num.seqs=13  
Similarity=0.894856  
CATCAAAAGGTGTGGACGGTGAAAATGATGTATGAAAAGAGGGATGATTCCAG

0

\*\*\*\*\*  
Consensus:

CATCAAAAGGTGTGGACGGTGAAAATGATGTATGAAAAGAGGGATGATTCCAG

>Bacillus\_Fam\_971\_53\_1 Nr. of seq. 1 Alignment length(with gaps) = 53  
Alignment score = 0.000000  
GCF\_000181495.1\_ASM18149v1\_genomic.fna\_157:28244-28774 Satlength=531 Nr  
of Repeats=10 RepeatLength=53 seed=ACGTTTCTTC Num.seqs=10  
Similarity=0.838435  
ACGTTTCTTCTCTAATCGTGCACCTTCACNTCAGATTCCCGCCTTCTAGGGGC

0

\*\*\*\*\*

Consensus:

ACGTTTCTTCTCTAATCGTGCACCTTCACNTCAGATTCCCGCCTTCTAGGGGC

>Bacillus\_Fam\_972\_53\_1 Nr. of seq. 1 Alignment length(with gaps) = 53  
Alignment score = 0.000000

GCF\_000181495.1\_ASM18149v1\_genomic.fna\_166:38412-38623 Satlength=212 Nr  
of Repeats=4 RepeatLength=53 seed=GTTGTTGAAG Num.seqs=3  
Similarity=0.932914

0 GTTGTTGAAGGGTAAAGTTTAAGAGCTAAACGTACCCCTTGAGTGCAGATTGA

\*\*\*\*\*

Consensus:

GTTGTTGAAGGGTAAAGTTTAAGAGCTAAACGTACCCCTTGAGTGCAGATTGA

>Bacillus\_Fam\_973\_53\_1 Nr. of seq. 1 Alignment length(with gaps) = 53  
Alignment score = 0.000000

GCF\_000181495.1\_ASM18149v1\_genomic.fna\_173:33950-34639 Satlength=690 Nr  
of Repeats=13 RepeatLength=53 seed=GTACATCATT Num.seqs=13  
Similarity=0.832608

GTACATCATTCGAGAGTCAACCAGGAAATGACACCCCGCGCGGGAGGAGCGCG

0

\*\*\*\*\*

Consensus:

GTACATCATTCGAGAGTCAACCAGGAAATGACACCCCGCGCGGGAGGAGCGCG

>Bacillus\_Fam\_974\_53\_1 Nr. of seq. 1 Alignment length(with gaps) = 53  
Alignment score = 0.000000

GCF\_000181495.1\_ASM18149v1\_genomic.fna\_173:43930-44406 Satlength=477 Nr  
of Repeats=8 RepeatLength=53 seed=CCAACATCTC Num.seqs=6  
Similarity=0.823251

0 CCAACATCTCGAGGAATTCTGAATCACAATGGTCCGATAACCCTCTAAACGGA

\*\*\*\*\*

Consensus:

CCAACATCTCGAGGAATTCTGAATCACAATGGTCCGATAACCCTCTAAACGGA

>Bacillus\_Fam\_975\_53\_1 Nr. of seq. 1 Alignment length(with gaps) = 53  
Alignment score = 0.000000

GCF\_000181495.1\_ASM18149v1\_genomic.fna\_174:16203-16625 Satlength=423 Nr  
of Repeats=8 RepeatLength=53 seed=GTAAACGTAC Num.seqs=7  
Similarity=0.832285

47 GTACCACTACAGAAGGNGAATCGGGCTTCTAATGGTACGATTAGCTTGTAAC

\*\*\*\*\*

Consensus:

GTAAACGTACCACTACAGAAGGNGAATCGGGCTTCTAATGGTACGATTAGCTT

>Bacillus\_Fam\_976\_53\_1 Nr. of seq. 1 Alignment length(with gaps) = 53  
Alignment score = 0.000000  
GCF\_000181495.1\_ASM18149v1\_genomic.fna\_175:7654-7968 Satlength=315 Nr of  
Repeats=6 RepeatLength=52 seed=AAAAGAGAAT Num.seqs=4 Similarity=0.752058  
0 AAAAGAGAATCGACCCTGTCTGAAGAGGCGTAAAGACCAGGTCGAATGGTTGCA

\*\*\*\*\*  
Consensus:

AAAAGAGAATCGACCCTGTCTGAAGAGGCGTAAAGACCAGGTCGAATGGTTGCA

>Bacillus\_Fam\_977\_53\_1 Nr. of seq. 1 Alignment length(with gaps) = 53  
Alignment score = 0.000000  
GCF\_000181495.1\_ASM18149v1\_genomic.fna\_178:36078-36870 Satlength=793 Nr  
of Repeats=13 RepeatLength=53 seed=GGCTTCATTT Num.seqs=11  
Similarity=0.778072  
GGCTTCATTTGTGGATTCAGGTGCTTATGACAACACGCGCTCGAGGTGCGCGG 0

\*\*\*\*\*  
Consensus:

GGCTTCATTTGTGGATTCAGGTGCTTATGACAACACGCGCTCGAGGTGCGCGG

>Bacillus\_Fam\_978\_53\_1 Nr. of seq. 1 Alignment length(with gaps) = 53  
Alignment score = 0.000000  
GCF\_000181495.1\_ASM18149v1\_genomic.fna\_179:78015-78438 Satlength=424 Nr  
of Repeats=7 RepeatLength=53 seed=CATCATTTCTG Num.seqs=5  
Similarity=0.864151  
0 CATCATTTCTGGGCCGCCGTGAAAAATGATGTAGGAAAAACAATCGGAATTAGGG

\*\*\*\*\*  
Consensus:

CATCATTTCTGGGCCGCCGTGAAAAATGATGTAGGAAAAACAATCGGAATTAGGG

>Bacillus\_Fam\_979\_53\_1 Nr. of seq. 1 Alignment length(with gaps) = 53  
Alignment score = 0.000000  
GCF\_000181495.1\_ASM18149v1\_genomic.fna\_181:51513-52096 Satlength=584 Nr  
of Repeats=11 RepeatLength=53 seed=TTGGTACATC Num.seqs=11  
Similarity=0.914923  
TTGGTACATCAAATCAAGGTGGTCCACGCAATGATGTCCTAATAAAGTCAGAA 0

\*\*\*\*\*  
Consensus:

TTGGTACATCAAATCAAGGTGGTCCACGCAATGATGTCCTAATAAAGTCAGAA

>Bacillus\_Fam\_980\_53\_1 Nr. of seq. 1 Alignment length(with gaps) = 53  
Alignment score = 0.000000  
GCF\_000181495.1\_ASM18149v1\_genomic.fna\_183:56196-56408 Satlength=213 Nr  
of Repeats=4 RepeatLength=53 seed=TGGCCCATTT Num.seqs=4  
Similarity=0.767677  
0 TGGCCCATTTAACCATTTAATGGACCAACACCCTTTAGAGTCGCAACTCTCAT

\*\*\*\*\*

Consensus:

TGGCCCATTTAACCATTTAATGGACCAACACCCTTTAGAGTCGCAACTCTCAT

>Bacillus\_Fam\_981\_53\_1 Nr. of seq. 1 Alignment length(with gaps) = 53  
Alignment score = 0.000000

GCF\_000181495.1\_ASM18149v1\_genomic.fna\_184:47614-48038 Satlength=425 Nr  
of Repeats=8 RepeatLength=53 seed=GTCATTTTGT Num.seqs=8  
Similarity=0.828593

0 GTCATTTTGTGAGAATTGGTCGAATGACACCCNGCGCCCCGTCCGCGCGGTAG

\*\*\*\*\*

Consensus:

GTCATTTTGTGAGAATTGGTCGAATGACACCCNGCGCCCCGTCCGCGCGGTAG

>Bacillus\_Fam\_982\_53\_1 Nr. of seq. 1 Alignment length(with gaps) = 53  
Alignment score = 0.000000

GCF\_000181495.1\_ASM18149v1\_genomic.fna\_186:247447-247818 Satlength=372 Nr  
of Repeats=7 RepeatLength=53 seed=CACTGGCCCA Num.seqs=7  
Similarity=0.744834

CACTGGCCCAATAATCCAATAAATGGGCCAACATGATCTGGTTTGTAGCAATCT

0

\*\*\*\*\*

Consensus:

CACTGGCCCAATAATCCAATAAATGGGCCAACATGATCTGGTTTGTAGCAATCT

>Bacillus\_Fam\_983\_53\_1 Nr. of seq. 1 Alignment length(with gaps) = 53  
Alignment score = 0.000000

GCF\_000181495.1\_ASM18149v1\_genomic.fna\_186:666606-666977 Satlength=372 Nr  
of Repeats=7 RepeatLength=53 seed=AAATGATGAC Num.seqs=7  
Similarity=0.856244

AAATGATGACATGCGCGCGNGNGCGCGGGGTGTCATTGTGTTGGATTTGCGG

0

\*\*\*\*\*

Consensus:

AAATGATGACATGCGCGCGNGNGCGCGGGGTGTCATTGTGTTGGATTTGCGG

>Bacillus\_Fam\_984\_53\_1 Nr. of seq. 1 Alignment length(with gaps) = 53  
Alignment score = 0.000000

GCF\_000181495.1\_ASM18149v1\_genomic.fna\_186:674905-675223 Satlength=319 Nr  
of Repeats=6 RepeatLength=53 seed=GTAATCGACC Num.seqs=6  
Similarity=0.839506

CGACCCAACATCTTCTCCAAAACCCAATCTCCTTGGGCTGTTTACCTCGTAAT

48

\*\*\*\*\*

Consensus:

GTAATCGACCCAACATCTTCTCCAAAACCCAATCTCCTTGGGCTGTTTACCTC

>Bacillus\_Fam\_985\_53\_1 Nr. of seq. 1 Alignment length(with gaps) = 53  
Alignment score = 0.000000  
GCF\_000285535.1\_ASM28553v1\_genomic.fna\_3:225928-226269 Satlength=342 Nr  
of Repeats=8 RepeatLength=53 seed=ATACCATTTA Num.seqs=5  
Similarity=0.793711  
0 ATACCATTTATCGTTGCTCGGCTTCGTGATATTCCGTTTACGCCGTTTGCGGT

\*\*\*\*\*  
Consensus:

ATACCATTTATCGTTGCTCGGCTTCGTGATATTCCGTTTACGCCGTTTGCGGT

>Bacillus\_Fam\_986\_53\_1 Nr. of seq. 1 Alignment length(with gaps) = 53  
Alignment score = 0.000000  
GCF\_000285535.1\_ASM28553v1\_genomic.fna\_61:20-436 Satlength=417 Nr of  
Repeats=8 RepeatLength=52 seed=ATGAAGAGGA Num.seqs=8 Similarity=0.769180  
0 ATGAAGAGGATACACCACGAATGAAAGCTACGAAATCCCCTTCATGAGAGCTA

\*\*\*\*\*  
Consensus:

ATGAAGAGGATACACCACGAATGAAAGCTACGAAATCCCCTTCATGAGAGCTA

>Bacillus\_Fam\_987\_53\_1 Nr. of seq. 1 Alignment length(with gaps) = 53  
Alignment score = 0.000000  
GCF\_000292245.2\_ASM29224v2\_genomic.fna\_27:54281-54494 Satlength=214 Nr of  
Repeats=4 RepeatLength=53 seed=GAGGAAAGTC Num.seqs=3 Similarity=0.823899  
0 GAGGAAAGTCAGAAGGAGAAGCTNNGNACGCGTCGGCAGGTTTCAGACTTTAGG

\*\*\*\*\*  
Consensus:

GAGGAAAGTCAGAAGGAGAAGCTNNGNACGCGTCGGCAGGTTTCAGACTTTAGG

>Bacillus\_Fam\_988\_53\_1 Nr. of seq. 1 Alignment length(with gaps) = 53  
Alignment score = 0.000000  
GCF\_000311725.1\_ASM31172v1\_genomic.fna\_2:378341-378913 Satlength=573 Nr  
of Repeats=11 RepeatLength=52 seed=TTGTCCGAAT Num.seqs=11  
Similarity=0.674931  
TTGTCCGAATAANCCTTCTATTTCGGACTIONAACCCTTGGTGCTTCNNTCNTC 0

\*\*\*\*\*  
Consensus:

TTGTCCGAATAANCCTTCTATTTCGGACTIONAACCCTTGGTGCTTCNNTCNTC

>Bacillus\_Fam\_989\_53\_1 Nr. of seq. 1 Alignment length(with gaps) = 53  
Alignment score = 0.000000  
GCF\_000311725.1\_ASM31172v1\_genomic.fna\_3:509966-510547 Satlength=582 Nr  
of Repeats=11 RepeatLength=53 seed=TTTGTCTCAT Num.seqs=9  
Similarity=0.858840  
0 TTTGTCTCATGGAGCNTTCATGTTACATGAGTTACTCCCTTTCTTGAGGAAAG

\*\*\*\*\*

Consensus:

TTTGTCTCATGGAGCNTTCATGTTACATGAGTTACTCCCTTTCTTGAGGAAAG

>Bacillus\_Fam\_990\_53\_1 Nr. of seq. 1 Alignment length(with gaps) = 53  
Alignment score = 0.000000  
GCF\_000374565.1\_ASM37456v1\_genomic.fna\_4:225418-226666 Satlength=1249 Nr  
of Repeats=24 RepeatLength=52 seed=ATTAGTGACC Num.seqs=24  
Similarity=0.592525 0  
ATTAGTGACCGTTTTCTNTTGCAACTACAAAAACGGGCATCTANTACACTCG

\*\*\*\*\*

Consensus:

ATTAGTGACCGTTTTCTNTTGCAACTACAAAAACGGGCATCTANTACACTCG

>Bacillus\_Fam\_991\_53\_1 Nr. of seq. 1 Alignment length(with gaps) = 53  
Alignment score = 0.000000  
GCF\_000708755.2\_ASM70875v2\_genomic.fna\_6:240161-240426 Satlength=266 Nr  
of Repeats=5 RepeatLength=53 seed=ATTATAACGT Num.seqs=5  
Similarity=0.854088  
0 ATTATAACGTAAGGAAACACTCGAATCGTACGCTATACGTACACCGGATGAAA

\*\*\*\*\*

Consensus:

ATTATAACGTAAGGAAACACTCGAATCGTACGCTATACGTACACCGGATGAAA

>Bacillus\_Fam\_992\_53\_1 Nr. of seq. 1 Alignment length(with gaps) = 53  
Alignment score = 0.000000  
GCF\_000709935.2\_ASM70993v2\_genomic.fna\_1:146658-146976 Satlength=319 Nr  
of Repeats=6 RepeatLength=53 seed=CCAGAAATGG Num.seqs=6  
Similarity=0.773585  
0 CCAGAAATGGTGACCGGAAACAGAGAAAAGTGGCGTCACTAAGGCGAGTGGCG

\*\*\*\*\*

Consensus:

CCAGAAATGGTGACCGGAAACAGAGAAAAGTGGCGTCACTAAGGCGAGTGGCG

>Bacillus\_Fam\_993\_53\_1 Nr. of seq. 1 Alignment length(with gaps) = 53  
Alignment score = 0.000000  
GCF\_000709935.2\_ASM70993v2\_genomic.fna\_1:748009-748380 Satlength=372 Nr  
of Repeats=7 RepeatLength=53 seed=AGAGTGCTGC Num.seqs=7  
Similarity=0.783169  
0 AGAGTGCTGCCACTTTTGCCGTTGAGGGATCATCGGAAGTGGCGTCAATCCAC

\*\*\*\*\*

Consensus:

AGAGTGCTGCCACTTTTGCCGTTGAGGGATCATCGGAAGTGGCGTCAATCCAC

>Bacillus\_Fam\_994\_53\_1 Nr. of seq. 1 Alignment length(with gaps) = 53  
Alignment score = 0.000000

GCF\_000709935.2\_ASM70993v2\_genomic.fna\_17:22189-22454 Satlength=266 Nr of Repeats=5 RepeatLength=53 seed=TGACGCCACA Num.seqs=5 Similarity=0.778616  
0 TGACGCCACAAAGCTGTTTGCAATATAAGTGAAAGTGGCGCAACTCNCCGGAG

\*\*\*\*\*

Consensus:

TGACGCCACAAAGCTGTTTGCAATATAAGTGAAAGTGGCGCAACTCNCCGGAG

>Bacillus\_Fam\_995\_53\_1 Nr. of seq. 1 Alignment length(with gaps) = 53  
Alignment score = 0.000000

GCF\_000709935.2\_ASM70993v2\_genomic.fna\_24:63175-63438 Satlength=264 Nr of Repeats=5 RepeatLength=53 seed=TGCCACTTTT Num.seqs=3 Similarity=0.882600  
0 TGCCACTTTTTGCGTGATGGGTTTGCCAATTGTGGTGTTCATTGGCCGTAGTGG

\*\*\*\*\*

Consensus:

TGCCACTTTTTGCGTGATGGGTTTGCCAATTGTGGTGTTCATTGGCCGTAGTGG

>Bacillus\_Fam\_996\_53\_1 Nr. of seq. 1 Alignment length(with gaps) = 53  
Alignment score = 0.000000

GCF\_000752035.1\_Bacillus\_rubiinfantis\_genomic.fna\_11:288723-288988 Satlength=266 Nr of Repeats=5 RepeatLength=53 seed=CGGGCTCCTA Num.seqs=5 Similarity=0.909434  
0 CGGGCTCCTATTTCAACGATTGGCTACCGTTTCCACTCCTTGAGAGCTACGCT

\*\*\*\*\*

Consensus:

CGGGCTCCTATTTCAACGATTGGCTACCGTTTCCACTCCTTGAGAGCTACGCT

>Bacillus\_Fam\_997\_53\_1 Nr. of seq. 1 Alignment length(with gaps) = 53  
Alignment score = 0.000000

GCF\_000759675.1\_ASM75967v1\_genomic.fna\_151:483245-483566 Satlength=322 Nr of Repeats=5 RepeatLength=53 seed=GTTTTGTCCT Num.seqs=3 Similarity=0.740042  
0 GTTTTGTCCTCAAGACCCCCGATTGAGGACGAATCCTCTGGGGACTCTTGNTA

\*\*\*\*\*

Consensus:

GTTTTGTCCTCAAGACCCCCGATTGAGGACGAATCCTCTGGGGACTCTTGNTA

>Bacillus\_Fam\_998\_53\_1 Nr. of seq. 1 Alignment length(with gaps) = 53  
Alignment score = 0.000000

GCF\_000813125.1\_ASM81312v1\_genomic.fna\_10:31192-31510 Satlength=319 Nr of Repeats=6 RepeatLength=53 seed=AAGAAAGATA Num.seqs=6 Similarity=0.788683  
0 AAGAAAGATACCCTTATGCAGCCGTTTGTTCATCACATAAGGGTACGAAAACCG

\*\*\*\*\*

Consensus:

AAGAAAGATACCCTTATGCAGCCGTTTGTTCATCACATAAGGGTACGAAAACCG



>Bacillus\_Fam\_999\_53\_1 Nr. of seq. 1 Alignment length(with gaps) = 53  
Alignment score = 0.000000  
GCF\_000813125.1\_ASM81312v1\_genomic.fna\_118:4594-4855 Satlength=262 Nr of  
Repeats=5 RepeatLength=52 seed=TATTGGTTAC Num.seqs=4 Similarity=0.660377  
0 TATTGGTTACCTATAATTCTAGTTTCAGCCCTTTTATAGGGCACCAATAACGCC

\*\*\*\*\*  
Consensus:

TATTGGTTACCTATAATTCTAGTTTCAGCCCTTTTATAGGGCACCAATAACGCC

>Bacillus\_Fam\_1000\_53\_1 Nr. of seq. 1 Alignment length(with gaps) = 53  
Alignment score = 0.000000  
GCF\_001315165.1\_ASM131516v1\_genomic.fna\_1:59355-59632 Satlength=278 Nr of  
Repeats=5 RepeatLength=53 seed=GTACCCTTAT Num.seqs=4 Similarity=0.878407  
0 GTACCCTTATGGAGAGCTTTCGCTTGGTATAAGGATACGATTAGGAGAAAATC

\*\*\*\*\*  
Consensus:

GTACCCTTATGGAGAGCTTTCGCTTGGTATAAGGATACGATTAGGAGAAAATC

>Bacillus\_Fam\_1001\_53\_1 Nr. of seq. 1 Alignment length(with gaps) = 53  
Alignment score = 0.000000  
GCF\_001315165.1\_ASM131516v1\_genomic.fna\_18:0-258 Satlength=259 Nr of  
Repeats=5 RepeatLength=52 seed=CTTCAGACAA Num.seqs=4 Similarity=0.834382  
0 CTTCAGACAAAATCTGCACGCCTAAGACGTGGTTTTGGCCGAACATGGCATCA

\*\*\*\*\*  
Consensus:

CTTCAGACAAAATCTGCACGCCTAAGACGTGGTTTTGGCCGAACATGGCATCA

>Bacillus\_Fam\_1002\_53\_1 Nr. of seq. 1 Alignment length(with gaps) = 53  
Alignment score = 0.000000  
GCF\_001315165.1\_ASM131516v1\_genomic.fna\_110:6-377 Satlength=372 Nr of  
Repeats=7 RepeatLength=53 seed=TATCCTTATG Num.seqs=7 Similarity=0.834681  
0 TATCCTTATGAGGTAAAATCCAGCAACATAAGGGTACCGTTCAAGCCNAATCG

\*\*\*\*\*  
Consensus:

TATCCTTATGAGGTAAAATCCAGCAACATAAGGGTACCGTTCAAGCCNAATCG

>Bacillus\_Fam\_1003\_53\_1 Nr. of seq. 1 Alignment length(with gaps) = 53  
Alignment score = 0.000000  
GCF\_001439915.1\_ASM143991v1\_genomic.fna\_83:366387-367075 Satlength=689 Nr of  
Repeats=13 RepeatLength=53 seed=CCTAAAAAGA Num.seqs=12  
Similarity=0.861254  
0 CCTAAAAAGAGGAAAATGGTGACCGTCAAAACGAAAGCAATGGTCACCAATCT

\*\*\*\*\*  
Consensus:

CCTAAAAAGAGGAAAATGGTGACCGTCAAAACGAAAGCAATGGTCACCAATCT

>Bacillus\_Fam\_1004\_53\_1 Nr. of seq. 1 Alignment length(with gaps) = 53  
Alignment score = 0.000000

GCF\_001439915.1\_ASM143991v1\_genomic.fna\_116:264620-264828 Satlength=209

Nr of Repeats=4 RepeatLength=52 seed=GTATTGCGAC Num.seqs=4

Similarity=0.578704

0

GTATTGCGACACAAAGCAAGAATTTTCAGCAAGCCGAGTCCGAATANAGCNTC

\*\*\*\*\*

Consensus:

GTATTGCGACACAAAGCAAGAATTTTCAGCAAGCCGAGTCCGAATANAGCNTC

>Bacillus\_Fam\_1005\_53\_1 Nr. of seq. 1 Alignment length(with gaps) = 53  
Alignment score = 0.000000

GCF\_001439915.1\_ASM143991v1\_genomic.fna\_125:212481-212689 Satlength=209

Nr of Repeats=4 RepeatLength=52 seed=CTTATGAAGA Num.seqs=4

Similarity=0.859539

0

CTTATGAAGACCTTTTCGACGAGCCACGAGTTCTGATTGAGTCTTCATCACG

\*\*\*\*\*

Consensus:

CTTATGAAGACCTTTTCGACGAGCCACGAGTTCTGATTGAGTCTTCATCACG

>Bacillus\_Fam\_1006\_53\_1 Nr. of seq. 1 Alignment length(with gaps) = 53  
Alignment score = 0.000000

GCF\_001591485.1\_ASM159148v1\_genomic.fna\_83:11410-11726 Satlength=317 Nr

of Repeats=6 RepeatLength=53 seed=ATGAAAGACA Num.seqs=5

Similarity=0.849057

0 ATGAAAGACAAAACTCAGGAGAATGGGTGAGGGAATTGTCCTTCATCCGGTGT

\*\*\*\*\*

Consensus:

ATGAAAGACAAAACTCAGGAGAATGGGTGAGGGAATTGTCCTTCATCCGGTGT

>Bacillus\_Fam\_1007\_53\_1 Nr. of seq. 1 Alignment length(with gaps) = 53  
Alignment score = 0.000000

GCF\_001591485.1\_ASM159148v1\_genomic.fna\_133:5376-5693 Satlength=318 Nr of

Repeats=5 RepeatLength=53 seed=GATGAAGCCC Num.seqs=3 Similarity=0.614256

0 GATGAAGCCCCAAANCCCACTAAGCCACNCAAGGATATGTNCTTCATAGGCNC

\*\*\*\*\*

Consensus:

GATGAAGCCCCAAANCCCACTAAGCCACNCAAGGATATGTNCTTCATAGGCNC

>Bacillus\_Fam\_1008\_53\_1 Nr. of seq. 1 Alignment length(with gaps) = 53  
Alignment score = 0.000000

GCF\_001591665.1\_ASM159166v1\_genomic.fna\_7:59019-59227 Satlength=209 Nr of Repeats=4 RepeatLength=52 seed=GTCAATGAAA Num.seqs=4 Similarity=0.701010  
0 GTCAATGAAAGCCTCTTCCATTTACCATGGAGGCCCNATTATTTCTCTTTTCG

\*\*\*\*\*

Consensus:

GTCAATGAAAGCCTCTTCCATTTACCATGGAGGCCCNATTATTTCTCTTTTCG

>Bacillus\_Fam\_1009\_53\_1 Nr. of seq. 1 Alignment length(with gaps) = 53  
Alignment score = 0.000000

GCF\_001591665.1\_ASM159166v1\_genomic.fna\_89:10754-11013 Satlength=260 Nr of Repeats=5 RepeatLength=52 seed=TATTGGAGCC Num.seqs=4  
Similarity=0.840671

0 TATTGGAGCCCATCTCTGTTTGAAAACCTGGGCAAAAGGTATCCAATCGATCCG

\*\*\*\*\*

Consensus:

TATTGGAGCCCATCTCTGTTTGAAAACCTGGGCAAAAGGTATCCAATCGATCCG

>Bacillus\_Fam\_1010\_53\_1 Nr. of seq. 1 Alignment length(with gaps) = 53  
Alignment score = 0.000000

GCF\_001636315.1\_ASM163631v1\_genomic.fna\_1:69909-70760 Satlength=852 Nr of Repeats=9 RepeatLength=53 seed=TTTTTACCGC Num.seqs=6 Similarity=0.647879  
0 TTTTTACCGCCTGACCCCTTCTCAGCACTCCGCGGGCAATAGAACCATCTTC

\*\*\*\*\*

Consensus:

TTTTTACCGCCTGACCCCTTCTCAGCACTCCGCGGGCAATAGAACCATCTTC

>Bacillus\_Fam\_1011\_53\_1 Nr. of seq. 1 Alignment length(with gaps) = 53  
Alignment score = 0.000000

GCF\_001636315.1\_ASM163631v1\_genomic.fna\_1:3822748-3823380 Satlength=633  
Nr of Repeats=12 RepeatLength=53 seed=TATTGCCCGA Num.seqs=8  
Similarity=0.682760 0

TATTGCCCGATTGNGGTGTCCAAGGGGTGCAAACGGTAAAAAGAACAGGCTTC

\*\*\*\*\*

Consensus:

TATTGCCCGATTGNGGTGTCCAAGGGGTGCAAACGGTAAAAAGAACAGGCTTC

>Bacillus\_Fam\_1012\_53\_1 Nr. of seq. 1 Alignment length(with gaps) = 53  
Alignment score = 0.000000

GCF\_001636335.1\_ASM163633v1\_genomic.fna\_1:112399-112815 Satlength=417 Nr of Repeats=8 RepeatLength=52 seed=TGTCCATCAT Num.seqs=8  
Similarity=0.780423

0 TGTCCATCATCCGTTAGATGAAGGCCATTTTATGAGGCAAATCATGGAGTAA

\*\*\*\*\*

Consensus:

TGTCCATCATCCGTTAGATGAAGGCCATTTTTCAGGCAAATCATGGAGTAA

>Bacillus\_Fam\_1013\_53\_1 Nr. of seq. 1 Alignment length(with gaps) = 53  
Alignment score = 0.000000  
GCF\_900107275.1\_IMG-  
taxon\_2675903024\_annotated\_assembly\_genomic.fna\_42:309000-309527  
Satlength=528 Nr of Repeats=10 RepeatLength=53 seed=TTCTGTCCCG  
Num.seqs=7 Similarity=0.952081 0  
TTCTGTCCCGAATCCGTTTCATACGGGACACTAGGGCATAAAAAGTGCAGACGC

\*\*\*\*\*

Consensus:

TTCTGTCCCGAATCCGTTTCATACGGGACACTAGGGCATAAAAAGTGCAGACGC

>Bacillus\_Fam\_1014\_53\_1 Nr. of seq. 1 Alignment length(with gaps) = 53  
Alignment score = 0.000000  
GCF\_900156865.1\_PRJEB18960\_genomic.fna\_3:2816531-2816795 Satlength=265 Nr  
of Repeats=5 RepeatLength=53 seed=GTCTCATCC Num.seqs=4  
Similarity=0.879115 0  
GTCTCATCCCTACCATGATAACAATTCCGAACCCTACTTTCTCTCCAAACAT

\*\*\*\*\*

Consensus:

GTCTCATCCCTACCATGATAACAATTCCGAACCCTACTTTCTCTCCAAACAT

>Bacillus\_Fam\_1015\_53\_1 Nr. of seq. 1 Alignment length(with gaps) = 53  
Alignment score = 0.000000  
GCF\_900156865.1\_PRJEB18960\_genomic.fna\_3:2955854-2956755 Satlength=902 Nr  
of Repeats=17 RepeatLength=53 seed=TTGCGGGTTC Num.seqs=17  
Similarity=0.813356 0  
TTGCGGGTTCGCACTTGGAACCTTTCTAGGAGATACCGAACCCGATTCCACCAC

\*\*\*\*\*

Consensus:

TTGCGGGTTCGCACTTGGAACCTTTCTAGGAGATACCGAACCCGATTCCACCAC

>Bacillus\_Fam\_1016\_53\_1 Nr. of seq. 1 Alignment length(with gaps) = 53  
Alignment score = 0.000000  
GCF\_900156865.1\_PRJEB18960\_genomic.fna\_3:3971592-3971910 Satlength=319 Nr  
of Repeats=6 RepeatLength=53 seed=AGAAAATAGG Num.seqs=6  
Similarity=0.914465 0  
AGAAAATAGGTAACAGCGAACCGTAAACCATTATAGTGGTATGCAAATGGA

\*\*\*\*\*

Consensus:

AGAAAATAGGTAACAGCGAACCGTAAACCATTATAGTGGTATGCAAATGGA

>Bacillus\_Fam\_1017\_52\_1 Nr. of seq. 1 Alignment length(with gaps) = 52  
Alignment score = 0.000000

BACILLUS\_PSEUDALCALIPHILUS\_genomic.fna\_2:394969-395177 Satlength=209 Nr of Repeats=4 RepeatLength=52 seed=TAATCGTGTA Num.seqs=4 Similarity=0.797694  
0 TAATCGTGTAGATACTGTGACCATTGTGGGGAGTAACTGACATGAAAAGGGC

\*\*\*\*\*

Consensus:

TAATCGTGTAGATACTGTGACCATTGTGGGGAGTAACTGACATGAAAAGGGC

>Bacillus\_Fam\_1018\_52\_1 Nr. of seq. 1 Alignment length(with gaps) = 52  
Alignment score = 0.000000

BACILLUS\_PSEUDALCALIPHILUS\_genomic.fna\_12:22087-22323 Satlength=237 Nr of Repeats=4 RepeatLength=52 seed=TAGCAACATA Num.seqs=3 Similarity=0.931624  
0 TAGCAACATATCGAGTGAAAAGGGCAGAGTTGTTGTAGGAAAAGTCGGGAAG

\*\*\*\*\*

Consensus:

TAGCAACATATCGAGTGAAAAGGGCAGAGTTGTTGTAGGAAAAGTCGGGAAG

>Bacillus\_Fam\_1019\_52\_1 Nr. of seq. 1 Alignment length(with gaps) = 52  
Alignment score = 0.000000

GCF\_000169195.2\_ASM16919v2\_genomic.fna\_1:619606-619865 Satlength=260 Nr of Repeats=5 RepeatLength=52 seed=GCTTTTGTCC Num.seqs=4  
Similarity=0.811966

0 GCTTTTGTCCATTTAGAACAGCTAACGGGACAATTCCACCGGAGCTGCCAGC

\*\*\*\*\*

Consensus:

GCTTTTGTCCATTTAGAACAGCTAACGGGACAATTCCACCGGAGCTGCCAGC

>Bacillus\_Fam\_1020\_52\_1 Nr. of seq. 1 Alignment length(with gaps) = 52  
Alignment score = 0.000000

GCF\_000169195.2\_ASM16919v2\_genomic.fna\_1:1522401-1523027 Satlength=627 Nr of Repeats=12 RepeatLength=52 seed=TGAAGGACAT Num.seqs=10  
Similarity=0.525016 0

TGAAGGACATTTTAGGGTTGTGGCGNCTTTGTTTTGTCCTTCATNGGGCGGA

\*\*\*\*\*

Consensus:

TGAAGGACATTTTAGGGTTGTGGCGNCTTTGTTTTGTCCTTCATNGGGCGGA

>Bacillus\_Fam\_1021\_52\_1 Nr. of seq. 1 Alignment length(with gaps) = 52  
Alignment score = 0.000000

GCF\_000169195.2\_ASM16919v2\_genomic.fna\_1:1523363-1523674 Satlength=312 Nr of Repeats=6 RepeatLength=52 seed=AAAAGCCAAA Num.seqs=5  
Similarity=0.700000 0

AAAAGCCAAAAGGCACCTGGNNANCGTCCAAACTGTCCTTTAGAACGTCTCA

\*\*\*\*\*

Consensus:

AAAAGCCAAAAGGCACCTGGNNANCGTCCAAACTGTCCTTTAGAACGTCTCA

>Bacillus\_Fam\_1022\_52\_1 Nr. of seq. 1 Alignment length(with gaps) = 52  
Alignment score = 0.000000  
GCF\_000171615.1\_ASM17161v1\_genomic.fna\_81:65762-66019 Satlength=258 Nr of  
Repeats=5 RepeatLength=52 seed=GCTCTTCTCT Num.seqs=4 Similarity=0.747379  
0 GCTCTTCTCTTCTTCCTGCTGCCTTTGAGACACGCGCTACCCCTAGCGCGGC

\*\*\*\*\*  
Consensus:

GCTCTTCTCTTCTTCCTGCTGCCTTTGAGACACGCGCTACCCCTAGCGCGGC

>Bacillus\_Fam\_1023\_52\_1 Nr. of seq. 1 Alignment length(with gaps) = 52  
Alignment score = 0.000000  
GCF\_000171615.1\_ASM17161v1\_genomic.fna\_88:78004-78212 Satlength=209 Nr of  
Repeats=4 RepeatLength=52 seed=GGCGCGGTGC Num.seqs=4 Similarity=0.854701  
0 GGCGCGGTGCAGAAAGTAGGTTTGGGCAGGGGTGAGAGCACCGCGCGGGGGT

\*\*\*\*\*  
Consensus:

GGCGCGGTGCAGAAAGTAGGTTTGGGCAGGGGTGAGAGCACCGCGCGGGGGT

>Bacillus\_Fam\_1024\_52\_1 Nr. of seq. 1 Alignment length(with gaps) = 52  
Alignment score = 0.000000  
GCF\_000171615.1\_ASM17161v1\_genomic.fna\_129:29159-29367 Satlength=209 Nr  
of Repeats=4 RepeatLength=52 seed=TTTTGGGCAC Num.seqs=4  
Similarity=0.813941  
0 TTTTGGGCACCGCGCGGACGCGGCGGCGCTCTTCTCACGCTGCAACTCAC

\*\*\*\*\*  
Consensus:

TTTTGGGCACCGCGCGGACGCGGCGGCGCTCTTCTCACGCTGCAACTCAC

>Bacillus\_Fam\_1025\_52\_1 Nr. of seq. 1 Alignment length(with gaps) = 52  
Alignment score = 0.000000  
GCF\_000175075.1\_ASM17507v1\_genomic.fna\_3:45105-45313 Satlength=209 Nr of  
Repeats=4 RepeatLength=52 seed=GAGATGTCTT Num.seqs=4 Similarity=0.897436  
0 GAGATGTCTTCATCCATGCGATGAGGACCTGTCTACGCACAAATAGGAACGA

\*\*\*\*\*  
Consensus:

GAGATGTCTTCATCCATGCGATGAGGACCTGTCTACGCACAAATAGGAACGA

>Bacillus\_Fam\_1026\_52\_1 Nr. of seq. 1 Alignment length(with gaps) = 52  
Alignment score = 0.000000  
GCF\_000175075.1\_ASM17507v1\_genomic.fna\_29:76482-76950 Satlength=469 Nr of  
Repeats=9 RepeatLength=52 seed=AGGTCTTCAT Num.seqs=9 Similarity=0.832285  
0 AGGTCTTCATACACCTTATGAAGACACTTCCAAGCCTGAAATCCTTCCACTA

\*\*\*\*\*

Consensus:

AGGTCTTCATACACCTTATGAAGACACTTCCAAGCCTGAAATCCTTCCACTA

>Bacillus\_Fam\_1027\_52\_1 Nr. of seq. 1 Alignment length(with gaps) = 52

Alignment score = 0.000000

GCF\_000175075.1\_ASM17507v1\_genomic.fna\_31:72973-73233 Satlength=261 Nr of Repeats=5 RepeatLength=52 seed=GACATCTCTC Num.seqs=5 Similarity=0.851282

0 GACATCTCTCCACCGGAAATCTTCTCTCACATGTCTTCATTCCGCTTATGAG

\*\*\*\*\*

Consensus:

GACATCTCTCCACCGGAAATCTTCTCTCACATGTCTTCATTCCGCTTATGAG

>Bacillus\_Fam\_1028\_52\_1 Nr. of seq. 1 Alignment length(with gaps) = 52

Alignment score = 0.000000

GCF\_000175075.1\_ASM17507v1\_genomic.fna\_31:101319-101579 Satlength=261 Nr of Repeats=5 RepeatLength=52 seed=GATGAAGACA Num.seqs=5

Similarity=0.907692

0 GATGAAGACATTCCTCATGATGATTTCTTTTCCAAAGTGTCTTCATCATGCG

\*\*\*\*\*

Consensus:

GATGAAGACATTCCTCATGATGATTTCTTTTCCAAAGTGTCTTCATCATGCG

>Bacillus\_Fam\_1029\_52\_1 Nr. of seq. 1 Alignment length(with gaps) = 52

Alignment score = 0.000000

GCF\_000175075.1\_ASM17507v1\_genomic.fna\_32:508521-508729 Satlength=209 Nr of Repeats=4 RepeatLength=52 seed=CAACATTGTC Num.seqs=4

Similarity=0.747863

0 CAACATTGTCCTCGTAGGTAGCGTACGACTCCCTGAGAAGGTGAAAACCCGC

\*\*\*\*\*

Consensus:

CAACATTGTCCTCGTAGGTAGCGTACGACTCCCTGAGAAGGTGAAAACCCGC

>Bacillus\_Fam\_1030\_52\_1 Nr. of seq. 1 Alignment length(with gaps) = 52

Alignment score = 0.000000

GCF\_000175075.1\_ASM17507v1\_genomic.fna\_34:87713-88025 Satlength=313 Nr of Repeats=6 RepeatLength=52 seed=AACGAGGACA Num.seqs=6 Similarity=0.912821

0 AACGAGGACAATGTTGACGTGATTTCTGGGGTTACCGGGTTTCATAGGAGTTC

\*\*\*\*\*

Consensus:

AACGAGGACAATGTTGACGTGATTTCTGGGGTTACCGGGTTTCATAGGAGTTC

>Bacillus\_Fam\_1031\_52\_1 Nr. of seq. 1 Alignment length(with gaps) = 52

Alignment score = 0.000000

GCF\_000175075.1\_ASM17507v1\_genomic.fna\_36:83466-83673 Satlength=208 Nr of Repeats=4 RepeatLength=52 seed=TGTTTGGTAA Num.seqs=3 Similarity=0.863248  
0 TGTTTGGTAAGATAGAGGGGTTCTATACGCCCCGAAGCAGCATGGTAAAAGGC

\*\*\*\*\*

Consensus:

TGTTTGGTAAGATAGAGGGGTTCTATACGCCCCGAAGCAGCATGGTAAAAGGC

>Bacillus\_Fam\_1032\_52\_1 Nr. of seq. 1 Alignment length(with gaps) = 52  
Alignment score = 0.000000

GCF\_000175075.1\_ASM17507v1\_genomic.fna\_38:28329-28537 Satlength=209 Nr of Repeats=4 RepeatLength=52 seed=GCTTCTATAC Num.seqs=4 Similarity=0.806080  
0 GCTTCTATACTACCGAAGACCTCGGGATTCTTACCGTTCGGGCGTATAGAAC

\*\*\*\*\*

Consensus:

GCTTCTATACTACCGAAGACCTCGGGATTCTTACCGTTCGGGCGTATAGAAC

>Bacillus\_Fam\_1033\_52\_1 Nr. of seq. 1 Alignment length(with gaps) = 52  
Alignment score = 0.000000

GCF\_000175075.1\_ASM17507v1\_genomic.fna\_39:50471-50679 Satlength=209 Nr of Repeats=4 RepeatLength=52 seed=AGGTAGTCAT Num.seqs=4 Similarity=0.710391  
0 AGGTAGTCATACGCTTTGAACGAGGACAATGTTTTACACTTTTCAGTGGGGA

\*\*\*\*\*

Consensus:

AGGTAGTCATACGCTTTGAACGAGGACAATGTTTTACACTTTTCAGTGGGGA

>Bacillus\_Fam\_1034\_52\_1 Nr. of seq. 1 Alignment length(with gaps) = 52  
Alignment score = 0.000000

GCF\_000175075.1\_ASM17507v1\_genomic.fna\_44:72380-72692 Satlength=313 Nr of Repeats=6 RepeatLength=52 seed=CTATACGACC Num.seqs=6 Similarity=0.864957  
0 CTATACGACCGAAGCTACTTATCAAGCTCCCCTTCCGTCTTATAGAACCCCT

\*\*\*\*\*

Consensus:

CTATACGACCGAAGCTACTTATCAAGCTCCCCTTCCGTCTTATAGAACCCCT

>Bacillus\_Fam\_1035\_52\_1 Nr. of seq. 1 Alignment length(with gaps) = 52  
Alignment score = 0.000000

GCF\_000175075.1\_ASM17507v1\_genomic.fna\_46:18322-18634 Satlength=313 Nr of Repeats=6 RepeatLength=52 seed=GACCGAAGCA Num.seqs=6 Similarity=0.909402  
0 GACCGAAGCAACCCCTATTACCTCGAAACGTCGTATAGAACGCTTCTATAC

\*\*\*\*\*

Consensus:

GACCGAAGCAACCCCTATTACCTCGAAACGTCGTATAGAACGCTTCTATAC



>Bacillus\_Fam\_1036\_52\_1 Nr. of seq. 1 Alignment length(with gaps) = 52  
Alignment score = 0.000000  
GCF\_000177235.2\_ASM17723v2\_genomic.fna\_1:339003-339210 Satlength=208 Nr  
of Repeats=4 RepeatLength=52 seed=CCCGTTAGAG Num.seqs=3  
Similarity=0.931624  
0 CCCGTTAGAGCAGGATTCAATAACTAAGTGTGCGATTAAACAGGGTTTAAAT

\*\*\*\*\*  
Consensus:

CCCGTTAGAGCAGGATTCAATAACTAAGTGTGCGATTAAACAGGGTTTAAAT

>Bacillus\_Fam\_1037\_52\_1 Nr. of seq. 1 Alignment length(with gaps) = 52  
Alignment score = 0.000000  
GCF\_000177235.2\_ASM17723v2\_genomic.fna\_1:650939-651407 Satlength=469 Nr  
of Repeats=8 RepeatLength=52 seed=GTGTCATAGC Num.seqs=7  
Similarity=0.668464  
0 GTGTCATAGCACTCGTATGACGCATCTTATATTGAATCTCTAGCTATGTNGT

\*\*\*\*\*  
Consensus:

GTGTCATAGCACTCGTATGACGCATCTTATATTGAATCTCTAGCTATGTNGT

>Bacillus\_Fam\_1038\_52\_1 Nr. of seq. 1 Alignment length(with gaps) = 52  
Alignment score = 0.000000  
GCF\_000177235.2\_ASM17723v2\_genomic.fna\_1:857866-858230 Satlength=365 Nr  
of Repeats=7 RepeatLength=52 seed=TAGTCTGAGT Num.seqs=7  
Similarity=0.904163  
0 TAGTCTGAGTGGATATAAAACACGAAATAAAATCTCGTTGTGATGGTGAGTC

\*\*\*\*\*  
Consensus:

TAGTCTGAGTGGATATAAAACACGAAATAAAATCTCGTTGTGATGGTGAGTC

>Bacillus\_Fam\_1039\_52\_1 Nr. of seq. 1 Alignment length(with gaps) = 52  
Alignment score = 0.000000  
GCF\_000177235.2\_ASM17723v2\_genomic.fna\_1:1710465-1710724 Satlength=260 Nr  
of Repeats=5 RepeatLength=52 seed=CCCGTTAGAA Num.seqs=4  
Similarity=0.893162 0  
CCCGTTAGAAATGATTATCCCGTGCTGAAGGTAGATAAAACAGCGTTTAAAG

\*\*\*\*\*  
Consensus:

CCCGTTAGAAATGATTATCCCGTGCTGAAGGTAGATAAAACAGCGTTTAAAG

>Bacillus\_Fam\_1040\_52\_1 Nr. of seq. 1 Alignment length(with gaps) = 52  
Alignment score = 0.000000  
GCF\_000177235.2\_ASM17723v2\_genomic.fna\_1:3148329-3148588 Satlength=260 Nr  
of Repeats=5 RepeatLength=52 seed=TGCGAGTGGA Num.seqs=4  
Similarity=0.824786 0  
TGCGAGTGGACTTTAAAGTGCCTATAAAATCCCATGAGGTAGAGGGAGCATG

\*\*\*\*\*

Consensus:

TGCGAGTGGACTTTTAAAGTGCCTATAAAATCCCATGAGGTAGAGGGAGCATG

>Bacillus\_Fam\_1041\_52\_1 Nr. of seq. 1 Alignment length(with gaps) = 52  
Alignment score = 0.000000  
GCF\_000177235.2\_ASM17723v2\_genomic.fna\_1:3704894-3705310 Satlength=417 Nr  
of Repeats=8 RepeatLength=52 seed=TTTTCCGTTC Num.seqs=8  
Similarity=0.891941 0  
TTTTCCGTTCAGTGGATCCTCTCTTCCTTGAACGGAATTCTTTGTCATTTTC

\*\*\*\*\*

Consensus:

TTTTCCGTTCAGTGGATCCTCTCTTCCTTGAACGGAATTCTTTGTCATTTTC

>Bacillus\_Fam\_1042\_52\_1 Nr. of seq. 1 Alignment length(with gaps) = 52  
Alignment score = 0.000000  
GCF\_000177235.2\_ASM17723v2\_genomic.fna\_1:3773627-3773939 Satlength=313 Nr  
of Repeats=6 RepeatLength=52 seed=TTGCTTTCCT Num.seqs=6  
Similarity=0.904274 0  
TTGCTTTCCTTTCTAAGGCACTCAGCTTCCTGGAAAGGAATACTAAGCCACT

\*\*\*\*\*

Consensus:

TTGCTTTCCTTTCTAAGGCACTCAGCTTCCTGGAAAGGAATACTAAGCCACT

>Bacillus\_Fam\_1043\_52\_1 Nr. of seq. 1 Alignment length(with gaps) = 52  
Alignment score = 0.000000  
GCF\_000177235.2\_ASM17723v2\_genomic.fna\_1:3821441-3821909 Satlength=469 Nr  
of Repeats=9 RepeatLength=52 seed=AATGGGTTC Num.seqs=9  
Similarity=0.868274 0  
AATGGGTTCATTTTGTTCGCGTGCCTTTTGCGCGTTGTTTTCTGCTCG

\*\*\*\*\*

Consensus:

AATGGGTTCATTTTGTTCGCGTGCCTTTTGCGCGTTGTTTTCTGCTCG

>Bacillus\_Fam\_1044\_52\_1 Nr. of seq. 1 Alignment length(with gaps) = 52  
Alignment score = 0.000000  
GCF\_000177235.2\_ASM17723v2\_genomic.fna\_1:3996570-3997090 Satlength=521 Nr  
of Repeats=10 RepeatLength=52 seed=AAGGAATGGG Num.seqs=10  
Similarity=0.924217 0  
AAGGAATGGGCGCTATTCTTATTGCTGGCCTTTACCTCTGATTTTGTGTA

\*\*\*\*\*

Consensus:

AAGGAATGGGCGCTATTCTTATTGCTGGCCTTTACCTCTGATTTTGTGTA

>Bacillus\_Fam\_1045\_52\_1 Nr. of seq. 1 Alignment length(with gaps) = 52  
Alignment score = 0.000000  
GCF\_000177235.2\_ASM17723v2\_genomic.fna\_1:4116764-4117128 Satlength=365 Nr  
of Repeats=7 RepeatLength=52 seed=CTTTCTCGGA Num.seqs=7  
Similarity=0.888889 0  
CTTTCTCGGATAGTTTTCTTTTCAGAGACTTTTTCTTCTTTGAACGGAACG

\*\*\*\*\*  
Consensus:

CTTTCTCGGATAGTTTTCTTTTCAGAGACTTTTTCTTCTTTGAACGGAACG

>Bacillus\_Fam\_1046\_52\_1 Nr. of seq. 1 Alignment length(with gaps) = 52  
Alignment score = 0.000000  
GCF\_000177235.2\_ASM17723v2\_genomic.fna\_1:4188801-4189419 Satlength=619 Nr  
of Repeats=11 RepeatLength=52 seed=TTCTTTCTTA Num.seqs=9  
Similarity=0.856125 0  
TTCTTTCTACTAGTAAAATCAGCCATGAAAGGAATACTAAACGCCTTCACT

\*\*\*\*\*  
Consensus:

TTCTTTCTACTAGTAAAATCAGCCATGAAAGGAATACTAAACGCCTTCACT

>Bacillus\_Fam\_1047\_52\_1 Nr. of seq. 1 Alignment length(with gaps) = 52  
Alignment score = 0.000000  
GCF\_000177235.2\_ASM17723v2\_genomic.fna\_1:4365838-4366774 Satlength=937 Nr  
of Repeats=18 RepeatLength=52 seed=TAAAGGAATA Num.seqs=18  
Similarity=0.863415 59  
CTCGTCCTAAAGGAATACTAAGCACTCTGGCTTTCCTTTCTACGTCGATTCC

\*\*\*\*\*  
Consensus:

TAAAGGAATACTAAGCACTCTGGCTTTCCTTTCTACGTCGATTCCCTCGTCC

>Bacillus\_Fam\_1048\_52\_1 Nr. of seq. 1 Alignment length(with gaps) = 52  
Alignment score = 0.000000  
GCF\_000181495.1\_ASM18149v1\_genomic.fna\_145:9012-9583 Satlength=572 Nr of  
Repeats=11 RepeatLength=52 seed=GTTGTCGATT Num.seqs=10  
Similarity=0.876353  
0 GTTGTCGATTAGGATTATGAAAAAATCGATGGTGCCAAAAGGTGCGAATGGG

\*\*\*\*\*  
Consensus:

GTTGTCGATTAGGATTATGAAAAAATCGATGGTGCCAAAAGGTGCGAATGGG

>Bacillus\_Fam\_1049\_52\_1 Nr. of seq. 1 Alignment length(with gaps) = 52  
Alignment score = 0.000000  
GCF\_000181495.1\_ASM18149v1\_genomic.fna\_158:13126-13858 Satlength=733 Nr  
of Repeats=14 RepeatLength=52 seed=CCCCGTCAAA Num.seqs=10  
Similarity=0.862678 0  
CCCCGTCAAAAGAGAGGGTATGAGGGTGTGCAATTGAATTTTGGTTGAATCGG

\*\*\*\*\*

Consensus:

CCCCGTCAAAGAGAGGGTATGAGGGTGTCTGAATTGAATTTGGTTGAATCGG

>Bacillus\_Fam\_1050\_52\_1 Nr. of seq. 1 Alignment length(with gaps) = 52  
Alignment score = 0.000000

GCF\_000181495.1\_ASM18149v1\_genomic.fna\_163:107-991 Satlength=885 Nr of  
Repeats=17 RepeatLength=52 seed=GAAACGTACC Num.seqs=15  
Similarity=0.871795

0 GAAACGTACCAATATAGAGTCAGAATCCTGCTGTAGTGGTAAGATTCGAGAA

\*\*\*\*\*

Consensus:

GAAACGTACCAATATAGAGTCAGAATCCTGCTGTAGTGGTAAGATTCGAGAA

>Bacillus\_Fam\_1051\_52\_1 Nr. of seq. 1 Alignment length(with gaps) = 52  
Alignment score = 0.000000

GCF\_000181495.1\_ASM18149v1\_genomic.fna\_174:41004-41469 Satlength=466 Nr  
of Repeats=9 RepeatLength=52 seed=AGGAATGATG Num.seqs=6  
Similarity=0.909402

0 AGGAATGATGTAGGAATGCAGGGGTAATTAGAGCATCAAATCGGAGAAGTGA

\*\*\*\*\*

Consensus:

AGGAATGATGTAGGAATGCAGGGGTAATTAGAGCATCAAATCGGAGAAGTGA

>Bacillus\_Fam\_1052\_52\_1 Nr. of seq. 1 Alignment length(with gaps) = 52  
Alignment score = 0.000000

GCF\_000181495.1\_ASM18149v1\_genomic.fna\_175:27082-27342 Satlength=261 Nr  
of Repeats=5 RepeatLength=52 seed=GGGTGTCTCA Num.seqs=5  
Similarity=0.830769

0 GGGTGTCTCATGAACGCTTCATGGGGCCATTTTGCCTGCATATTTGAAGTTA

\*\*\*\*\*

Consensus:

GGGTGTCTCATGAACGCTTCATGGGGCCATTTTGCCTGCATATTTGAAGTTA

>Bacillus\_Fam\_1053\_52\_1 Nr. of seq. 1 Alignment length(with gaps) = 52  
Alignment score = 0.000000

GCF\_000181495.1\_ASM18149v1\_genomic.fna\_178:14811-15278 Satlength=468 Nr  
of Repeats=9 RepeatLength=52 seed=GGTGGTCGAA Num.seqs=8  
Similarity=0.883700

0 GGTGGTCGAATCCCAAAAAAGAGAATCGGCCCCGTCAAAGTGCTGCTTCGA

\*\*\*\*\*

Consensus:

GGTGGTCGAATCCCAAAAAAGAGAATCGGCCCCGTCAAAGTGCTGCTTCGA

>Bacillus\_Fam\_1054\_52\_1 Nr. of seq. 1 Alignment length(with gaps) = 52  
Alignment score = 0.000000  
GCF\_000181495.1\_ASM18149v1\_genomic.fna\_186:206325-206533 Satlength=209 Nr  
of Repeats=4 RepeatLength=52 seed=GGTGGAATTT Num.seqs=4  
Similarity=0.751048 0  
GGTGGAATTTAGTTTTGGAGAAATCGGCATGGTCAAAGCGGGCGAAAGACAG

\*\*\*\*\*  
Consensus:

GGTGGAATTTAGTTTTGGAGAAATCGGCATGGTCAAAGCGGGCGAAAGACAG

>Bacillus\_Fam\_1055\_52\_1 Nr. of seq. 1 Alignment length(with gaps) = 52  
Alignment score = 0.000000  
GCF\_000186145.1\_Bacillus\_sp\_2\_A\_57\_CT2\_V1\_genomic.fna\_4:74543-74803  
Satlength=261 Nr of Repeats=5 RepeatLength=52 seed=CTCAACCAGA Num.seqs=3  
Similarity=0.676955 0  
CTCAACCAGAGTCCGAAGTTGTACTAGGTTTCGGACTCAAATTNCAGGATGAG

\*\*\*\*\*  
Consensus:

CTCAACCAGAGTCCGAAGTTGTACTAGGTTTCGGACTCAAATTNCAGGATGAG

>Bacillus\_Fam\_1056\_52\_1 Nr. of seq. 1 Alignment length(with gaps) = 52  
Alignment score = 0.000000  
GCF\_000186145.1\_Bacillus\_sp\_2\_A\_57\_CT2\_V1\_genomic.fna\_4:197835-198199  
Satlength=365 Nr of Repeats=7 RepeatLength=52 seed=ATGAAGCCGA Num.seqs=7  
Similarity=0.710758 0  
ATGAAGCCGAAAAGTCGTGNAGCGATAAGAAAACGGTCGCCATGAGGCAGTC

\*\*\*\*\*  
Consensus:

ATGAAGCCGAAAAGTCGTGNAGCGATAAGAAAACGGTCGCCATGAGGCAGTC

>Bacillus\_Fam\_1057\_52\_1 Nr. of seq. 1 Alignment length(with gaps) = 52  
Alignment score = 0.000000  
GCF\_000186145.1\_Bacillus\_sp\_2\_A\_57\_CT2\_V1\_genomic.fna\_5:287610-288102  
Satlength=493 Nr of Repeats=9 RepeatLength=52 seed=GACGAAAATT Num.seqs=7  
Similarity=0.750916 0  
GACGAAAATTCAGTGGCTCACCAANAAATGGTCGACATAGAGCCTTCATGAA

\*\*\*\*\*  
Consensus:

GACGAAAATTCAGTGGCTCACCAANAAATGGTCGACATAGAGCCTTCATGAA

>Bacillus\_Fam\_1058\_52\_1 Nr. of seq. 1 Alignment length(with gaps) = 52  
Alignment score = 0.000000  
GCF\_000285535.1\_ASM28553v1\_genomic.fna\_1:1333233-1333493 Satlength=261 Nr  
of Repeats=5 RepeatLength=52 seed=TCACAGACAA Num.seqs=5  
Similarity=0.776923 0  
TCACAGACAATTCATTCAACTTTTTACTNCGNTTGTCTTCGAGACTGGCTA

\*\*\*\*\*

Consensus:

TCACAGACAATTCACTCAACTTTTTACTNCGNTTTGTCTTCGAGACTGGCTA

>Bacillus\_Fam\_1059\_52\_1 Nr. of seq. 1 Alignment length(with gaps) = 52  
Alignment score = 0.000000

GCF\_000285535.1\_ASM28553v1\_genomic.fna\_2:421697-421905 Satlength=209 Nr  
of Repeats=4 RepeatLength=52 seed=TATGAAGGAC Num.seqs=4  
Similarity=0.738994

0 TATGAAGGACTTTCTACCGGCCAGGCTGCTCGTTTCGAGGCTTCATCGGCCT

\*\*\*\*\*

Consensus:

TATGAAGGACTTTCTACCGGCCAGGCTGCTCGTTTCGAGGCTTCATCGGCCT

>Bacillus\_Fam\_1060\_52\_1 Nr. of seq. 1 Alignment length(with gaps) = 52  
Alignment score = 0.000000

GCF\_000285535.1\_ASM28553v1\_genomic.fna\_2:945617-946345 Satlength=729 Nr  
of Repeats=14 RepeatLength=52 seed=TCAGTTTCTC Num.seqs=14  
Similarity=0.766234

TCAGTTTCTCAGACCNAATCCCCTTCATAGACCACTTGAAGAGGATACACCT

0

\*\*\*\*\*

Consensus:

TCAGTTTCTCAGACCNAATCCCCTTCATAGACCACTTGAAGAGGATACACCT

>Bacillus\_Fam\_1061\_52\_1 Nr. of seq. 1 Alignment length(with gaps) = 52  
Alignment score = 0.000000

GCF\_000285535.1\_ASM28553v1\_genomic.fna\_3:73213-73421 Satlength=209 Nr of  
Repeats=4 RepeatLength=52 seed=CCTCGGCATA Num.seqs=4 Similarity=0.901709

0 CCTCGGCATACTCCGGTTTGTCTTGTCTCCGAGAGCAGCTATCAAACACTTT

\*\*\*\*\*

Consensus:

CCTCGGCATACTCCGGTTTGTCTTGTCTCCGAGAGCAGCTATCAAACACTTT

>Bacillus\_Fam\_1062\_52\_1 Nr. of seq. 1 Alignment length(with gaps) = 52  
Alignment score = 0.000000

GCF\_000285535.1\_ASM28553v1\_genomic.fna\_3:346534-347418 Satlength=885 Nr  
of Repeats=17 RepeatLength=52 seed=TTCAATGCCT Num.seqs=17  
Similarity=0.826934

TTCAATGCCTCGATGAAGAGCATAACGCAACAGAACTATGCTCGAATTCCTC

0

\*\*\*\*\*

Consensus:

TTCAATGCCTCGATGAAGAGCATAACGCAACAGAACTATGCTCGAATTCCTC

>Bacillus\_Fam\_1063\_52\_1 Nr. of seq. 1 Alignment length(with gaps) = 52  
Alignment score = 0.000000  
GCF\_000292245.2\_ASM29224v2\_genomic.fna\_3:32494-32754 Satlength=261 Nr of  
Repeats=5 RepeatLength=52 seed=TTGGACATTC Num.seqs=5 Similarity=0.833333  
0 TTGGACATTCTGACTACCTCCACTTTCTCCTTTGTCCTTTAAACTTGGGATA

\*\*\*\*\*  
Consensus:

TTGGACATTCTGACTACCTCCACTTTCTCCTTTGTCCTTTAAACTTGGGATA

>Bacillus\_Fam\_1064\_52\_1 Nr. of seq. 1 Alignment length(with gaps) = 52  
Alignment score = 0.000000  
GCF\_000292245.2\_ASM29224v2\_genomic.fna\_9:64736-64996 Satlength=261 Nr of  
Repeats=5 RepeatLength=52 seed=TACATGTTTT Num.seqs=5 Similarity=0.938462  
0 TACATGTTTTGGCTGGTTGCTGACCATTATTTGGGTGCCATACTCATTGGG

\*\*\*\*\*  
Consensus:

TACATGTTTTGGCTGGTTGCTGACCATTATTTGGGTGCCATACTCATTGGG

>Bacillus\_Fam\_1065\_52\_1 Nr. of seq. 1 Alignment length(with gaps) = 52  
Alignment score = 0.000000  
GCF\_000292245.2\_ASM29224v2\_genomic.fna\_29:13895-14099 Satlength=205 Nr of  
Repeats=4 RepeatLength=51 seed=TAATTCGTAA Num.seqs=4 Similarity=0.692387  
0 TAATTCGTAATGTAATTTCCCACTATGNACTAATTACGGTGCGTATAACCCC

\*\*\*\*\*  
Consensus:

TAATTCGTAATGTAATTTCCCACTATGNACTAATTACGGTGCGTATAACCCC

>Bacillus\_Fam\_1066\_52\_1 Nr. of seq. 1 Alignment length(with gaps) = 52  
Alignment score = 0.000000  
GCF\_000294775.2\_ASM29477v2\_genomic.fna\_1:1113586-1113995 Satlength=410 Nr  
of Repeats=6 RepeatLength=52 seed=GTTCGACAG Num.seqs=4  
Similarity=0.786325 0  
GTTCGACAGGAGAAGAGGAAAAACCGTGGATTGAGTCCGAAGTCGCCCTAT

\*\*\*\*\*  
Consensus:

GTTCGACAGGAGAAGAGGAAAAACCGTGGATTGAGTCCGAAGTCGCCCTAT

>Bacillus\_Fam\_1067\_52\_1 Nr. of seq. 1 Alignment length(with gaps) = 52  
Alignment score = 0.000000  
GCF\_000294775.2\_ASM29477v2\_genomic.fna\_1:4788379-4788640 Satlength=262 Nr  
of Repeats=5 RepeatLength=52 seed=TTTCGACAGA Num.seqs=4  
Similarity=0.863248 0  
TTTCGACAGACTCTGGACTTTTTCTGCCTTGCTGTCCGAAGTGGCCAGG

\*\*\*\*\*  
Consensus:

TTCGGACAGACTCTGGACTTTTTCTGCCTTGCTGTCCGAACTTGCCCCAGG

>Bacillus\_Fam\_1068\_52\_1 Nr. of seq. 1 Alignment length(with gaps) = 52  
Alignment score = 0.000000  
GCF\_000307855.1\_BAZO1.0\_genomic.fna\_40:158681-158889 Satlength=209 Nr of  
Repeats=4 RepeatLength=52 seed=TTTATCCTCA Num.seqs=4 Similarity=0.923077  
0 TTTATCCTCACCAAACCGAGCCTAGATGAGGTTTGATAGTAAATAACTCGTG

\*\*\*\*\*  
Consensus:

TTTATCCTCACCAAACCGAGCCTAGATGAGGTTTGATAGTAAATAACTCGTG

>Bacillus\_Fam\_1069\_52\_1 Nr. of seq. 1 Alignment length(with gaps) = 52  
Alignment score = 0.000000  
GCF\_000307855.1\_BAZO1.0\_genomic.fna\_128:3586-3794 Satlength=209 Nr of  
Repeats=4 RepeatLength=52 seed=TTTGGTGAGG Num.seqs=4 Similarity=0.829060  
0 TTTGGTGAGGATAAAAGCAGGTTATCTACTACCAAAGTAAGTAGAGTGGA

\*\*\*\*\*  
Consensus:

TTTGGTGAGGATAAAAGCAGGTTATCTACTACCAAAGTAAGTAGAGTGGA

>Bacillus\_Fam\_1070\_52\_1 Nr. of seq. 1 Alignment length(with gaps) = 52  
Alignment score = 0.000000  
GCF\_000307875.1\_BABA1.0\_genomic.fna\_114:10800-11164 Satlength=365 Nr of  
Repeats=7 RepeatLength=52 seed=AAAATCTAGC Num.seqs=7 Similarity=0.875458  
0 AAAATCTAGCGGACTGTCCTTAATAGGCGCTGTTGAGGACAAAACGGGGTTG

\*\*\*\*\*  
Consensus:

AAAATCTAGCGGACTGTCCTTAATAGGCGCTGTTGAGGACAAAACGGGGTTG

>Bacillus\_Fam\_1071\_52\_1 Nr. of seq. 1 Alignment length(with gaps) = 52  
Alignment score = 0.000000  
GCF\_000311725.1\_ASM31172v1\_genomic.fna\_4:536064-536636 Satlength=573 Nr  
of Repeats=11 RepeatLength=52 seed=TCTGTCCGAA Num.seqs=11  
Similarity=0.756253  
TCTGTCCGAATGCACCTCTTATTCGGAATCCTTCACCTCTCTACTACCTTT

\*\*\*\*\*  
Consensus:

TCTGTCCGAATGCACCTCTTATTCGGAATCCTTCACCTCTCTACTACCTTT

>Bacillus\_Fam\_1072\_52\_1 Nr. of seq. 1 Alignment length(with gaps) = 52  
Alignment score = 0.000000  
GCF\_000311725.1\_ASM31172v1\_genomic.fna\_7:13528-13944 Satlength=417 Nr of  
Repeats=8 RepeatLength=52 seed=ATTCGGACAA Num.seqs=8 Similarity=0.889194  
0 ATTCGGACAAGCCTATGGCTTCTTGCTTCCTACTTGTCCGAATATCCTTCG



\*\*\*\*\*

Consensus:

ATTCGGACAAGCCTATGGCTTCTTGCTTCCTACTTGTCCGAATATCCTTCCG

>Bacillus\_Fam\_1073\_52\_1 Nr. of seq. 1 Alignment length(with gaps) = 52  
Alignment score = 0.000000  
GCF\_000331575.1\_ASM33157v1\_genomic.fna\_1:30506-31078 Satlength=573 Nr of  
Repeats=11 RepeatLength=52 seed=TGTCCGAAC T Num.seqs=11  
Similarity=0.902098  
0 TGTCCGAAC TAGGCTTAAGTTCGGACAGAAATGACCGCTTTTCTCAAATGG

\*\*\*\*\*

Consensus:

TGTCCGAAC TAGGCTTAAGTTCGGACAGAAATGACCGCTTTTCTCAAATGG

>Bacillus\_Fam\_1074\_52\_1 Nr. of seq. 1 Alignment length(with gaps) = 52  
Alignment score = 0.000000  
GCF\_000331575.1\_ASM33157v1\_genomic.fna\_3:87769-87977 Satlength=209 Nr of  
Repeats=4 RepeatLength=52 seed=ATTGCGTTGC Num.seqs=4 Similarity=0.871795  
0 ATTGCGTTGCTCTCGATCAAGAAATGGACTTCATAGCCGAGGTAACGATCGT

\*\*\*\*\*

Consensus:

ATTGCGTTGCTCTCGATCAAGAAATGGACTTCATAGCCGAGGTAACGATCGT

>Bacillus\_Fam\_1075\_52\_1 Nr. of seq. 1 Alignment length(with gaps) = 52  
Alignment score = 0.000000  
GCF\_000374345.1\_ASM37434v1\_genomic.fna\_4:25818-26244 Satlength=427 Nr of  
Repeats=6 RepeatLength=52 seed=CGTTCATAAG Num.seqs=5 Similarity=0.779487  
0 CGTTCATAAGGCGGATGAAAGCCATTGTAAAGAGAAAAACAGGTGAGAAGG

\*\*\*\*\*

Consensus:

CGTTCATAAGGCGGATGAAAGCCATTGTAAAGAGAAAAACAGGTGAGAAGG

>Bacillus\_Fam\_1076\_52\_1 Nr. of seq. 1 Alignment length(with gaps) = 52  
Alignment score = 0.000000  
GCF\_000374345.1\_ASM37434v1\_genomic.fna\_7:32632-33048 Satlength=417 Nr of  
Repeats=8 RepeatLength=52 seed=AATGGCGTTC Num.seqs=8 Similarity=0.884615  
0 AATGGCGTTCATCAGCCGTATGAACGCTATCTCTACCGGGTTGATCCTTGA

\*\*\*\*\*

Consensus:

AATGGCGTTCATCAGCCGTATGAACGCTATCTCTACCGGGTTGATCCTTGA

>Bacillus\_Fam\_1077\_52\_1 Nr. of seq. 1 Alignment length(with gaps) = 52  
Alignment score = 0.000000

GCF\_000374345.1\_ASM37434v1\_genomic.fna\_7:56200-56512 Satlength=313 Nr of Repeats=6 RepeatLength=52 seed=CGGGCTTTCA Num.seqs=6 Similarity=0.731070  
0 CGGGCTTTCATATCCCCAATGAACGACCGTTTCCCCGGGCACTTGCCTGATT

\*\*\*\*\*

Consensus:

CGGGCTTTCATATCCCCAATGAACGACCGTTTCCCCGGGCACTTGCCTGATT

>Bacillus\_Fam\_1078\_52\_1 Nr. of seq. 1 Alignment length(with gaps) = 52  
Alignment score = 0.000000

GCF\_000374345.1\_ASM37434v1\_genomic.fna\_9:65991-66356 Satlength=366 Nr of Repeats=7 RepeatLength=52 seed=GCGAAATGAA Num.seqs=6 Similarity=0.789727  
0 GCGAAATGAAGTTCATCAGGCCTATGAAAGCAATCGCGGCCGAAATTTTAGA

\*\*\*\*\*

Consensus:

GCGAAATGAAGTTCATCAGGCCTATGAAAGCAATCGCGGCCGAAATTTTAGA

>Bacillus\_Fam\_1079\_52\_1 Nr. of seq. 1 Alignment length(with gaps) = 52  
Alignment score = 0.000000

GCF\_000374345.1\_ASM37434v1\_genomic.fna\_24:14134-14498 Satlength=365 Nr of Repeats=7 RepeatLength=52 seed=GGGCTTTCAT Num.seqs=7 Similarity=0.714585  
0 GGGCTTTCATTTCGACCGATGATCGACCGCGCGGATGGTTTTTCTCTCGCGT

\*\*\*\*\*

Consensus:

GGGCTTTCATTTCGACCGATGATCGACCGCGCGGATGGTTTTTCTCTCGCGT

>Bacillus\_Fam\_1080\_52\_1 Nr. of seq. 1 Alignment length(with gaps) = 52  
Alignment score = 0.000000

GCF\_000374345.1\_ASM37434v1\_genomic.fna\_26:26410-26774 Satlength=365 Nr of Repeats=6 RepeatLength=52 seed=ATGAACGCGA Num.seqs=5 Similarity=0.803086  
0 ATGAACGCGATCACGAATGAAAAAGGGGGTTACGATGGTGTTCATAAGNCCG

\*\*\*\*\*

Consensus:

ATGAACGCGATCACGAATGAAAAAGGGGGTTACGATGGTGTTCATAAGNCCG

>Bacillus\_Fam\_1081\_52\_1 Nr. of seq. 1 Alignment length(with gaps) = 52  
Alignment score = 0.000000

GCF\_000374345.1\_ASM37434v1\_genomic.fna\_44:13486-13902 Satlength=417 Nr of Repeats=8 RepeatLength=52 seed=ATAGCGTTCA Num.seqs=8 Similarity=0.722527  
0 ATAGCGTTCATCCCGGTATGAACTTCATCTTGANTATCTTTTTTACTTGNA

\*\*\*\*\*

Consensus:

ATAGCGTTCATCCCGGTATGAACTTCATCTTGANTATCTTTTTTACTTGNA

>Bacillus\_Fam\_1082\_52\_1 Nr. of seq. 1 Alignment length(with gaps) = 52  
Alignment score = 0.000000  
GCF\_000374345.1\_ASM37434v1\_genomic.fna\_80:5979-6392 Satlength=414 Nr of  
Repeats=8 RepeatLength=52 seed=GCTTATGAAC Num.seqs=5 Similarity=0.861538  
0 GCTTATGAACTGCATTTGGCATGGATTTTTTTACCGAGATAGCGTTCATTCC

\*\*\*\*\*  
Consensus:

GCTTATGAACTGCATTTGGCATGGATTTTTTTACCGAGATAGCGTTCATTCC

>Bacillus\_Fam\_1083\_52\_1 Nr. of seq. 1 Alignment length(with gaps) = 52  
Alignment score = 0.000000  
GCF\_000374565.1\_ASM37456v1\_genomic.fna\_1:689690-690002 Satlength=313 Nr  
of Repeats=6 RepeatLength=52 seed=CGGGCACTTT Num.seqs=6  
Similarity=0.786373  
0 CGGGCACTTTTAGCCTCTATTAGTGACCGGTTCTCTCGACAAACTCTATTTG

\*\*\*\*\*  
Consensus:

CGGGCACTTTTAGCCTCTATTAGTGACCGGTTCTCTCGACAAACTCTATTTG

>Bacillus\_Fam\_1084\_52\_1 Nr. of seq. 1 Alignment length(with gaps) = 52  
Alignment score = 0.000000  
GCF\_000374565.1\_ASM37456v1\_genomic.fna\_3:204349-204867 Satlength=519 Nr  
of Repeats=10 RepeatLength=52 seed=AATCGGTAAC Num.seqs=8  
Similarity=0.749084  
0 AATCGGTAAC TAATAGGCAGGAAAGATGCCCGAATCCGNTGTGTCTCGTCCCGC

\*\*\*\*\*  
Consensus:

AATCGGTAAC TAATAGGCAGGAAAGATGCCCGAATCCGNTGTGTCTCGTCCCGC

>Bacillus\_Fam\_1085\_52\_1 Nr. of seq. 1 Alignment length(with gaps) = 52  
Alignment score = 0.000000  
GCF\_000374565.1\_ASM37456v1\_genomic.fna\_5:148962-149638 Satlength=677 Nr  
of Repeats=13 RepeatLength=52 seed=CGTATATCCC Num.seqs=13  
Similarity=0.844541  
CGTATATCCCAAAAAGCGGTCACCAATCGTATGGATTAGTGCCCGTTCTGAG

0

\*\*\*\*\*  
Consensus:

CGTATATCCCAAAAAGCGGTCACCAATCGTATGGATTAGTGCCCGTTCTGAG

>Bacillus\_Fam\_1086\_52\_1 Nr. of seq. 1 Alignment length(with gaps) = 52  
Alignment score = 0.000000  
GCF\_000374565.1\_ASM37456v1\_genomic.fna\_6:158147-158511 Satlength=365 Nr  
of Repeats=7 RepeatLength=52 seed=AAAAGCGGTC Num.seqs=5  
Similarity=0.769811  
0 AAAAGCGGTCACGATTAGTGAGGAAAGATGCCCGTTT TAGTCGGTTTT CAGT

\*\*\*\*\*

Consensus:

AAAAGCGGTCACGATTAGTGAGGAAAGATGCCCGTTTTAGTCGGTTTTTCAGT

>Bacillus\_Fam\_1087\_52\_1 Nr. of seq. 1 Alignment length(with gaps) = 52  
Alignment score = 0.000000

GCF\_000374565.1\_ASM37456v1\_genomic.fna\_7:2370-2942 Satlength=573 Nr of  
Repeats=11 RepeatLength=52 seed=TATTTGTGAC Num.seqs=11  
Similarity=0.857343

0 TATTTGTGACCGGATTTCTGATTTCTCCCTTCAAACGGGCATCTTCCACTAC

\*\*\*\*\*

Consensus:

TATTTGTGACCGGATTTCTGATTTCTCCCTTCAAACGGGCATCTTCCACTAC

>Bacillus\_Fam\_1088\_52\_1 Nr. of seq. 1 Alignment length(with gaps) = 52  
Alignment score = 0.000000

GCF\_000374565.1\_ASM37456v1\_genomic.fna\_12:88054-88651 Satlength=598 Nr of  
Repeats=8 RepeatLength=52 seed=TCCTAAAAA Num.seqs=7 Similarity=0.860806

0 TCCTAAAAAGTGCTAAAAAGTGCCCGTAATGTGGTGAATCACGAAAATCCGG

\*\*\*\*\*

Consensus:

TCCTAAAAAGTGCTAAAAAGTGCCCGTAATGTGGTGAATCACGAAAATCCGG

>Bacillus\_Fam\_1089\_52\_1 Nr. of seq. 1 Alignment length(with gaps) = 52  
Alignment score = 0.000000

GCF\_000374565.1\_ASM37456v1\_genomic.fna\_16:33589-34317 Satlength=729 Nr of  
Repeats=12 RepeatLength=52 seed=ACCGCTTTTT Num.seqs=10  
Similarity=0.750105

0 ACCGCTTTTTACCAAAATCTCTCGTAACGGGCACCTTTCTCCAACATTAGTG

\*\*\*\*\*

Consensus:

ACCGCTTTTTACCAAAATCTCTCGTAACGGGCACCTTTCTCCAACATTAGTG

>Bacillus\_Fam\_1090\_52\_1 Nr. of seq. 1 Alignment length(with gaps) = 52  
Alignment score = 0.000000

GCF\_000374565.1\_ASM37456v1\_genomic.fna\_22:20071-20488 Satlength=418 Nr of  
Repeats=8 RepeatLength=52 seed=ACCAATAAAG Num.seqs=7 Similarity=0.912088

0 ACCAATAAAGGTTAATAGTGCCCGAAAAGGAGAAAAAAGTGCTCTAATGGTC

\*\*\*\*\*

Consensus:

ACCAATAAAGGTTAATAGTGCCCGAAAAGGAGAAAAAAGTGCTCTAATGGTC

>Bacillus\_Fam\_1091\_52\_1 Nr. of seq. 1 Alignment length(with gaps) = 52  
Alignment score = 0.000000

GCF\_000374565.1\_ASM37456v1\_genomic.fna\_29:30054-30365 Satlength=312 Nr of Repeats=6 RepeatLength=52 seed=GATTAGTGAC Num.seqs=5 Similarity=0.826415  
50 TTAGTGACCGNTTTTCGGATTAACGCAACTTTTCGGGCATCTTTTACTCCGA

\*\*\*\*\*

Consensus:

GATTAGTGACCGNTTTTCGGATTAACGCAACTTTTCGGGCATCTTTTACTCC

>Bacillus\_Fam\_1092\_52\_1 Nr. of seq. 1 Alignment length(with gaps) = 52  
Alignment score = 0.000000

GCF\_000401235.1\_BacNeaAAU1\_genomic.fna\_144:20-332 Satlength=313 Nr of Repeats=6 RepeatLength=52 seed=GTTTCATCTTG Num.seqs=6 Similarity=0.859829  
0 GTTCATCTTGTTTATGAACGATAGTTTTGCCCTCTTCTTTTGAAAAAGTGGC

\*\*\*\*\*

Consensus:

GTTCATCTTGTTTATGAACGATAGTTTTGCCCTCTTCTTTTGAAAAAGTGGC

>Bacillus\_Fam\_1093\_52\_1 Nr. of seq. 1 Alignment length(with gaps) = 52  
Alignment score = 0.000000

GCF\_000401235.1\_BacNeaAAU1\_genomic.fna\_153:115-374 Satlength=260 Nr of Repeats=5 RepeatLength=52 seed=TGGCTTTCAT Num.seqs=4 Similarity=0.871795  
0 TGGCTTTCATTCCCTTGATGAACGCCACTTTCCTCCAAGATTACCTTAAAC

\*\*\*\*\*

Consensus:

TGGCTTTCATTCCCTTGATGAACGCCACTTTCCTCCAAGATTACCTTAAAC

>Bacillus\_Fam\_1094\_52\_1 Nr. of seq. 1 Alignment length(with gaps) = 52  
Alignment score = 0.000000

GCF\_000430765.1\_ASM43076v1\_genomic.fna\_3:286133-286444 Satlength=312 Nr of Repeats=6 RepeatLength=52 seed=TGTCCGAAGT Num.seqs=5 Similarity=0.861538  
0 TGTCCGAAGTGGGTCTGTGTTTCGACAACCTCCGGATGAATCCAAGCCAAC

\*\*\*\*\*

Consensus:

TGTCCGAAGTGGGTCTGTGTTTCGACAACCTCCGGATGAATCCAAGCCAAC

>Bacillus\_Fam\_1095\_52\_1 Nr. of seq. 1 Alignment length(with gaps) = 52  
Alignment score = 0.000000

GCF\_000430765.1\_ASM43076v1\_genomic.fna\_5:148049-148621 Satlength=573 Nr of Repeats=11 RepeatLength=52 seed=TCTCTGAACC Num.seqs=9 Similarity=0.735755  
0 TCTCTGAACCATTTNCCAGCGGAGCAGCCTCNGTTTTGGTCTTGAGACGCCT

\*\*\*\*\*

Consensus:

TCTCTGAACCATTTNCCAGCGGAGCAGCCTCNGTTTTGGTCTTGAGACGCCT

>Bacillus\_Fam\_1096\_52\_1 Nr. of seq. 1 Alignment length(with gaps) = 52  
Alignment score = 0.000000  
GCF\_000430765.1\_ASM43076v1\_genomic.fna\_6:140008-140268 Satlength=261 Nr  
of Repeats=5 RepeatLength=52 seed=TCTCATGACC Num.seqs=5  
Similarity=0.979487  
0 TCTCATGACCAAACTTCTGCCGCTTCCCCTCTTTATGGTTCTGAGACGCAC

\*\*\*\*\*

Consensus:

TCTCATGACCAAACTTCTGCCGCTTCCCCTCTTTATGGTTCTGAGACGCAC

>Bacillus\_Fam\_1097\_52\_1 Nr. of seq. 1 Alignment length(with gaps) = 52  
Alignment score = 0.000000  
GCF\_000430765.1\_ASM43076v1\_genomic.fna\_7:289548-290021 Satlength=474 Nr  
of Repeats=9 RepeatLength=52 seed=CCTCTCAAGA Num.seqs=6  
Similarity=0.858700  
0 CCTCTCAAGACCAAAATTCCTTTAAGCAAGCGGAGAAGTGGTTCAGAGAGGG

\*\*\*\*\*

Consensus:

CCTCTCAAGACCAAAATTCCTTTAAGCAAGCGGAGAAGTGGTTCAGAGAGGG

>Bacillus\_Fam\_1098\_52\_1 Nr. of seq. 1 Alignment length(with gaps) = 52  
Alignment score = 0.000000  
GCF\_000430765.1\_ASM43076v1\_genomic.fna\_9:15-224 Satlength=210 Nr of  
Repeats=4 RepeatLength=52 seed=GGATGACGAA Num.seqs=3 Similarity=0.811321  
0 GGATGACGAAGATAGGTCAATGAGAAGGGTTCTAATGGACACTACGCTGAAN

\*\*\*\*\*

Consensus:

GGATGACGAAGATAGGTCAATGAGAAGGGTTCTAATGGACACTACGCTGAAN

>Bacillus\_Fam\_1099\_52\_1 Nr. of seq. 1 Alignment length(with gaps) = 52  
Alignment score = 0.000000  
GCF\_000430765.1\_ASM43076v1\_genomic.fna\_12:149140-149400 Satlength=261 Nr  
of Repeats=5 RepeatLength=52 seed=TCAGGACCAA Num.seqs=5  
Similarity=0.948718  
7 GGGCGTCTCAGGACCAAAACAAAGACAGAGCTGGTGAAAGTGGTTCAGAGG

\*\*\*\*\*

Consensus:

TCAGGACCAAAACAAAGACAGAGCTGGTGAAAGTGGTTCAGAGGGGCGTC

>Bacillus\_Fam\_1100\_52\_1 Nr. of seq. 1 Alignment length(with gaps) = 52  
Alignment score = 0.000000  
GCF\_000473245.1\_ASM47324v1\_genomic.fna\_1:4633527-4633839 Satlength=313 Nr  
of Repeats=6 RepeatLength=52 seed=GGGTCTTAGT Num.seqs=6  
Similarity=0.859829  
GGGTCTTAGTTTCTCTGACTAGCACCTCTGGTTTGGTTTTTGTGATTCAGA

0

\*\*\*\*\*

Consensus:

GGGTCTTAGTTTCTCTGACTAGCACCTCTGGTTTGGTTTTGTGATTCAGA

>Bacillus\_Fam\_1101\_52\_1 Nr. of seq. 1 Alignment length(with gaps) = 52  
Alignment score = 0.000000  
GCF\_000508325.1\_BAVI\_1\_genomic.fna\_69:22489-22749 Satlength=261 Nr of  
Repeats=5 RepeatLength=52 seed=CGATAAGCTA Num.seqs=5 Similarity=0.775472  
0 CGATAAGCTACCCAACCTGGTTCTTTCTTGATGGATTCGGTCGCTTATAANCC

\*\*\*\*\*

Consensus:

CGATAAGCTACCCAACCTGGTTCTTTCTTGATGGATTCGGTCGCTTATAANCC

>Bacillus\_Fam\_1102\_52\_1 Nr. of seq. 1 Alignment length(with gaps) = 52  
Alignment score = 0.000000  
GCF\_000508325.1\_BAVI\_1\_genomic.fna\_161:5891-6101 Satlength=211 Nr of  
Repeats=4 RepeatLength=52 seed=GGGCACTCTG Num.seqs=3 Similarity=0.846154  
0 GGGCACTCTGGCTACTCCACAGTGCCCGGTTGATGCTTTTTTCTCCTCACAT

\*\*\*\*\*

Consensus:

GGGCACTCTGGCTACTCCACAGTGCCCGGTTGATGCTTTTTTCTCCTCACAT

>Bacillus\_Fam\_1103\_52\_1 Nr. of seq. 1 Alignment length(with gaps) = 52  
Alignment score = 0.000000  
GCF\_000612665.1\_FF4\_genomic.fna\_19:82518-82985 Satlength=468 Nr of  
Repeats=9 RepeatLength=52 seed=CGGTCATTAA Num.seqs=8 Similarity=0.904762  
0 CGGTCATTAAAGCGGGGCTCTAAATGCCCCGCGGAGAGCGAAAAAGGAAGGGAG

\*\*\*\*\*

Consensus:

CGGTCATTAAAGCGGGGCTCTAAATGCCCCGCGGAGAGCGAAAAAGGAAGGGAG

>Bacillus\_Fam\_1104\_52\_1 Nr. of seq. 1 Alignment length(with gaps) = 52  
Alignment score = 0.000000  
GCF\_000612665.1\_FF4\_genomic.fna\_65:35468-35676 Satlength=209 Nr of  
Repeats=4 RepeatLength=52 seed=TCTTAGTTAC Num.seqs=4 Similarity=0.850427  
0 TCTTAGTTACCGCGAGACCCGCATTTTCTCCTTCGCGGGCATTTAGAGCCCT

\*\*\*\*\*

Consensus:

TCTTAGTTACCGCGAGACCCGCATTTTCTCCTTCGCGGGCATTTAGAGCCCT

>Bacillus\_Fam\_1105\_52\_1 Nr. of seq. 1 Alignment length(with gaps) = 52  
Alignment score = 0.000000

GCF\_000612665.1\_FF4\_genomic.fna\_66:181657-182736 Satlength=1080 Nr of Repeats=9 RepeatLength=52 seed=TTATAGCCTT Num.seqs=8 Similarity=0.807692  
0 TTATAGCCTTTATAAATGACCGACCGACCGGAAAAANCGCCAGCTCGGGCAT

\*\*\*\*\*  
Consensus:

TTATAGCCTTTATAAATGACCGACCGACCGGAAAAANCGCCAGCTCGGGCAT

>Bacillus\_Fam\_1106\_52\_1 Nr. of seq. 1 Alignment length(with gaps) = 52  
Alignment score = 0.000000

GCF\_000708755.2\_ASM70875v2\_genomic.fna\_1:477291-477603 Satlength=313 Nr of Repeats=6 RepeatLength=52 seed=AACCAAGTAA Num.seqs=6  
Similarity=0.882051

0 AACCAAGTAAGTGTTCTATACCGTCAATAGCAACACTTTCCTCATCAATTG

\*\*\*\*\*  
Consensus:

AACCAAGTAAGTGTTCTATACCGTCAATAGCAACACTTTCCTCATCAATTG

>Bacillus\_Fam\_1107\_52\_1 Nr. of seq. 1 Alignment length(with gaps) = 52  
Alignment score = 0.000000

GCF\_000708755.2\_ASM70875v2\_genomic.fna\_1:508584-508844 Satlength=261 Nr of Repeats=4 RepeatLength=52 seed=TCGTTTAAGA Num.seqs=3  
Similarity=0.836478

0 TCGTTTAAGAGCACTTTGGTCTTGCTGTGAATCGGAGTTCTTGTTGCAAACA

\*\*\*\*\*  
Consensus:

TCGTTTAAGAGCACTTTGGTCTTGCTGTGAATCGGAGTTCTTGTTGCAAACA

>Bacillus\_Fam\_1108\_52\_1 Nr. of seq. 1 Alignment length(with gaps) = 52  
Alignment score = 0.000000

GCF\_000708755.2\_ASM70875v2\_genomic.fna\_2:662686-662998 Satlength=313 Nr of Repeats=5 RepeatLength=52 seed=TATTCAGCCG Num.seqs=4  
Similarity=0.863248

0 TATTCAGCCGCAACCAATTTATAGGGTTGCATTTGCCAGTATGGTACCCTC

\*\*\*\*\*  
Consensus:

TATTCAGCCGCAACCAATTTATAGGGTTGCATTTGCCAGTATGGTACCCTC

>Bacillus\_Fam\_1109\_52\_1 Nr. of seq. 1 Alignment length(with gaps) = 52  
Alignment score = 0.000000

GCF\_000708755.2\_ASM70875v2\_genomic.fna\_2:713425-713736 Satlength=312 Nr of Repeats=6 RepeatLength=52 seed=TAGAACACTT Num.seqs=5  
Similarity=0.723077

0 TAGAACACTTTCTGCGGTCGGGATNCCNACTTAATGTTGCTTACTCCGGTT

\*\*\*\*\*  
Consensus:



TAGAACACTTTCTGCGGTCGGGATNCCNACTTAATGTTGCTTACTCCGGTT

>Bacillus\_Fam\_1110\_52\_1 Nr. of seq. 1 Alignment length(with gaps) = 52  
Alignment score = 0.000000  
GCF\_000708755.2\_ASM70875v2\_genomic.fna\_2:1183664-1183924 Satlength=261 Nr  
of Repeats=5 RepeatLength=52 seed=CAAAATGTTG Num.seqs=5  
Similarity=0.784906 0  
CAAAATGTTGCTAAAGCCAGGTTAGAACACTTTCNGGGCTTTCTGGCCTCTG

\*\*\*\*\*  
Consensus:

CAAAATGTTGCTAAAGCCAGGTTAGAACACTTTCNGGGCTTTCTGGCCTCTG

>Bacillus\_Fam\_1111\_52\_1 Nr. of seq. 1 Alignment length(with gaps) = 52  
Alignment score = 0.000000  
GCF\_000708755.2\_ASM70875v2\_genomic.fna\_2:1324156-1324364 Satlength=209 Nr  
of Repeats=4 RepeatLength=52 seed=CTGAAGGGCA Num.seqs=4  
Similarity=0.854701 0  
CTGAAGGGCACATTCCTGCCTGGTTTTTCGACCTTCAGCTTACTTCCTTTTCC

\*\*\*\*\*  
Consensus:

CTGAAGGGCACATTCCTGCCTGGTTTTTCGACCTTCAGCTTACTTCCTTTTCC

>Bacillus\_Fam\_1112\_52\_1 Nr. of seq. 1 Alignment length(with gaps) = 52  
Alignment score = 0.000000  
GCF\_000708755.2\_ASM70875v2\_genomic.fna\_2:1620621-1620829 Satlength=209 Nr  
of Repeats=4 RepeatLength=52 seed=ACCCTTCACA Num.seqs=4  
Similarity=0.735043 0  
ACCCTTCACACAATCCCCTGATAAACGGTCATATCTTATCCACTTATA

\*\*\*\*\*  
Consensus:

ACCCTTCACACAATCCCCTGATAAACGGTCATATCTTATCCACTTATA

>Bacillus\_Fam\_1113\_52\_1 Nr. of seq. 1 Alignment length(with gaps) = 52  
Alignment score = 0.000000  
GCF\_000708755.2\_ASM70875v2\_genomic.fna\_2:1684021-1684385 Satlength=365 Nr  
of Repeats=7 RepeatLength=52 seed=ACCTTCAGCT Num.seqs=5  
Similarity=0.810256 0  
ACCTTCAGCTTCTTCTCCACCAACTGAAGGGCACGATCCATCCGCTTTTGTG

\*\*\*\*\*  
Consensus:

ACCTTCAGCTTCTTCTCCACCAACTGAAGGGCACGATCCATCCGCTTTTGTG

>Bacillus\_Fam\_1114\_52\_1 Nr. of seq. 1 Alignment length(with gaps) = 52  
Alignment score = 0.000000

GCF\_000708755.2\_ASM70875v2\_genomic.fna\_6:178665-178925 Satlength=261 Nr  
of Repeats=5 RepeatLength=52 seed=TAAGTGCCT Num.seqs=5  
Similarity=0.789091  
0 TAAGTGCCTTATCTCGGTTTTAGAACACTTTCACAGATANTGCNCTTTGGC

\*\*\*\*\*  
Consensus:

TAAGTGCCTTATCTCGGTTTTAGAACACTTTCACAGATANTGCNCTTTGGC

>Bacillus\_Fam\_1115\_52\_1 Nr. of seq. 1 Alignment length(with gaps) = 52  
Alignment score = 0.000000  
GCF\_000708755.2\_ASM70875v2\_genomic.fna\_6:348631-348839 Satlength=209 Nr  
of Repeats=4 RepeatLength=52 seed=GCTGCGGCGG Num.seqs=4  
Similarity=0.841880  
0 GCTGCGGCGGAAAGGCATGAAGGGTCATAAGAGGCTTGGATTGTTACCTTCA

\*\*\*\*\*  
Consensus:

GCTGCGGCGGAAAGGCATGAAGGGTCATAAGAGGCTTGGATTGTTACCTTCA

>Bacillus\_Fam\_1116\_52\_1 Nr. of seq. 1 Alignment length(with gaps) = 52  
Alignment score = 0.000000  
GCF\_000708755.2\_ASM70875v2\_genomic.fna\_7:130520-130728 Satlength=209 Nr  
of Repeats=4 RepeatLength=52 seed=TTTCTCCAG Num.seqs=4  
Similarity=0.829060  
0 TTTCTCCAGGCTCACGCTCCACTTTGTGCTCTTAACCCGCGGAAGCGCAC

\*\*\*\*\*  
Consensus:

TTTCTCCAGGCTCACGCTCCACTTTGTGCTCTTAACCCGCGGAAGCGCAC

>Bacillus\_Fam\_1117\_52\_1 Nr. of seq. 1 Alignment length(with gaps) = 52  
Alignment score = 0.000000  
GCF\_000709935.2\_ASM70993v2\_genomic.fna\_1:71045-71305 Satlength=261 Nr of  
Repeats=5 RepeatLength=52 seed=GAAATATAGG Num.seqs=5 Similarity=0.762963  
0 GAAATATAGGGCAGCAAAACATGAAAATGCAACCCTATAAAATGCGCCATCT

\*\*\*\*\*  
Consensus:

GAAATATAGGGCAGCAAAACATGAAAATGCAACCCTATAAAATGCGCCATCT

>Bacillus\_Fam\_1118\_52\_1 Nr. of seq. 1 Alignment length(with gaps) = 52  
Alignment score = 0.000000  
GCF\_000709935.2\_ASM70993v2\_genomic.fna\_1:1027951-1028263 Satlength=313 Nr  
of Repeats=6 RepeatLength=52 seed=CTGTATTTTG Num.seqs=6  
Similarity=0.776520  
0 CTGTATTTTGGACAAGCNGATTTATAGGGCAGCATTTACCTTTTGGTGCC

\*\*\*\*\*  
Consensus:

CTGTATTTTGGACAAGCNGATTTATAGGGCAGCATTTACCTTTTTGGTGCC

>Bacillus\_Fam\_1119\_52\_1 Nr. of seq. 1 Alignment length(with gaps) = 52  
Alignment score = 0.000000  
GCF\_000709935.2\_ASM70993v2\_genomic.fna\_1:1073715-1073923 Satlength=209 Nr  
of Repeats=4 RepeatLength=52 seed=CATAAGTGCT Num.seqs=4  
Similarity=0.688034 0  
CATAAGTGCTGCAAAGCTGGTTTAACAACATAAACTCAGCTGCAGGAAGCCG

\*\*\*\*\*  
Consensus:

CATAAGTGCTGCAAAGCTGGTTTAACAACATAAACTCAGCTGCAGGAAGCCG

>Bacillus\_Fam\_1120\_52\_1 Nr. of seq. 1 Alignment length(with gaps) = 52  
Alignment score = 0.000000  
GCF\_000709935.2\_ASM70993v2\_genomic.fna\_5:462972-463648 Satlength=677 Nr  
of Repeats=13 RepeatLength=52 seed=TTCTTATCGG Num.seqs=13  
Similarity=0.793904 0  
TTCTTATCGGACGAATNGGTGCCATCAAANCTGATTCTTCTCTGCTTGAGGG

\*\*\*\*\*  
Consensus:

TTCTTATCGGACGAATNGGTGCCATCAAANCTGATTCTTCTCTGCTTGAGGG

>Bacillus\_Fam\_1121\_52\_1 Nr. of seq. 1 Alignment length(with gaps) = 52  
Alignment score = 0.000000  
GCF\_000709935.2\_ASM70993v2\_genomic.fna\_19:19072-19436 Satlength=365 Nr of  
Repeats=7 RepeatLength=52 seed=GAACCCCTCAA Num.seqs=7 Similarity=0.848596  
0 GAACCCCTCAAGCTTTGGATTCTGTGGATTGATGGCACTTATAGCAGAGTTTA

\*\*\*\*\*  
Consensus:

GAACCCCTCAAGCTTTGGATTCTGTGGATTGATGGCACTTATAGCAGAGTTTA

>Bacillus\_Fam\_1122\_52\_1 Nr. of seq. 1 Alignment length(with gaps) = 52  
Alignment score = 0.000000  
GCF\_000709935.2\_ASM70993v2\_genomic.fna\_19:109951-110159 Satlength=209 Nr  
of Repeats=4 RepeatLength=52 seed=AAGTGTCTT Num.seqs=4  
Similarity=0.769231  
0 AAGTGTCTTATCCTGCTTTTACAGCACTTATCTTCGCTCCGGAGTCACTCA

\*\*\*\*\*  
Consensus:

AAGTGTCTTATCCTGCTTTTACAGCACTTATCTTCGCTCCGGAGTCACTCA

>Bacillus\_Fam\_1123\_52\_1 Nr. of seq. 1 Alignment length(with gaps) = 52  
Alignment score = 0.000000  
GCF\_000752035.1\_Bacillus\_rubiinfantis\_genomic.fna\_11:243707-244693  
Satlength=987 Nr of Repeats=19 RepeatLength=52 seed=AGCGGGTAAA

Num.seqs=17 Similarity=0.943439 0  
AGCGGGTAAAATAAAGCGCCGTTTTTTACCGGTGATAGCCTTTTTTCGCTCC

\*\*\*\*\*

Consensus:

AGCGGGTAAAATAAAGCGCCGTTTTTTACCGGTGATAGCCTTTTTTCGCTCC

>Bacillus\_Fam\_1124\_52\_1 Nr. of seq. 1 Alignment length(with gaps) = 52  
Alignment score = 0.000000

GCF\_000752035.1\_Bacillus\_rubiinfantis\_genomic.fna\_11:495149-495669

Satlength=521 Nr of Repeats=10 RepeatLength=52 seed=CGCTTATACC

Num.seqs=10 Similarity=0.908262 0

CGCTTATACCCTTTATTGGTGACCGAACCAAGTGTCAAACCCATGGTTCCGGG

\*\*\*\*\*

Consensus:

CGCTTATACCCTTTATTGGTGACCGAACCAAGTGTCAAACCCATGGTTCCGGG

>Bacillus\_Fam\_1125\_52\_1 Nr. of seq. 1 Alignment length(with gaps) = 52  
Alignment score = 0.000000

GCF\_000752035.1\_Bacillus\_rubiinfantis\_genomic.fna\_24:501342-502175

Satlength=834 Nr of Repeats=16 RepeatLength=52 seed=TTATTGGCGA

Num.seqs=15 Similarity=0.867155 0

TTATTGGCGACCGCTCACTACTGGAGNTCCTTCGCTCGGGCGCTTATCTCCC

\*\*\*\*\*

Consensus:

TTATTGGCGACCGCTCACTACTGGAGNTCCTTCGCTCGGGCGCTTATCTCCC

>Bacillus\_Fam\_1126\_52\_1 Nr. of seq. 1 Alignment length(with gaps) = 52  
Alignment score = 0.000000

GCF\_000752395.1\_Bacillus\_andreraoultii\_genomic.fna\_24:95882-96453

Satlength=572 Nr of Repeats=11 RepeatLength=52 seed=GACCTTTTCA

Num.seqs=10 Similarity=0.829060

0 GACCTTTTCAACCTTTTTTACCACAATTCGGGCGTCTACAACCTTTCTAGAG

\*\*\*\*\*

Consensus:

GACCTTTTCAACCTTTTTTACCACAATTCGGGCGTCTACAACCTTTCTAGAG

>Bacillus\_Fam\_1127\_52\_1 Nr. of seq. 1 Alignment length(with gaps) = 52  
Alignment score = 0.000000

GCF\_000752395.1\_Bacillus\_andreraoultii\_genomic.fna\_43:160186-160819

Satlength=634 Nr of Repeats=4 RepeatLength=52 seed=AGGGTTCTCA Num.seqs=3  
Similarity=0.948718 0

AGGGTTCTCAAGACAAAGTGCACGCAAAACCGGTGAAACTGTCCTAGACA

\*\*\*\*\*

Consensus:

AGGGTTCTCAAGGACAAAGTGCACGCAAAAACCGGTGAAACTGTCCTAGACA

>Bacillus\_Fam\_1128\_52\_1 Nr. of seq. 1 Alignment length(with gaps) = 52  
Alignment score = 0.000000  
GCF\_000759675.1\_ASM75967v1\_genomic.fna\_19:237050-237362 Satlength=313 Nr  
of Repeats=6 RepeatLength=52 seed=TCTTAAGGAC Num.seqs=6  
Similarity=0.936752  
0 TCTTAAGGACAAATCTTCTAGTTCTCTTTAGAGATTTGTCCTTCATACCCCT

\*\*\*\*\*  
Consensus:

TCTTAAGGACAAATCTTCTAGTTCTCTTTAGAGATTTGTCCTTCATACCCCT

>Bacillus\_Fam\_1129\_52\_1 Nr. of seq. 1 Alignment length(with gaps) = 52  
Alignment score = 0.000000  
GCF\_000759675.1\_ASM75967v1\_genomic.fna\_126:195884-196092 Satlength=209 Nr  
of Repeats=4 RepeatLength=52 seed=GTAACGATTA Num.seqs=4  
Similarity=0.850427 0  
GTAACGATTAGTCGCTAATCGTGCCCTTCTCCTCGATTTTTTGGAGTTTGCG

\*\*\*\*\*  
Consensus:

GTAACGATTAGTCGCTAATCGTGCCCTTCTCCTCGATTTTTTGGAGTTTGCG

>Bacillus\_Fam\_1130\_52\_1 Nr. of seq. 1 Alignment length(with gaps) = 52  
Alignment score = 0.000000  
GCF\_000759675.1\_ASM75967v1\_genomic.fna\_151:38292-38799 Satlength=508 Nr  
of Repeats=8 RepeatLength=52 seed=TATGAGTGAC Num.seqs=6  
Similarity=0.814675  
0 TATGAGTGACCGCTTGTCTTTTTCCAGGAGGTTCTTGGGCTCTCATGAACCT

\*\*\*\*\*  
Consensus:

TATGAGTGACCGCTTGTCTTTTTCCAGGAGGTTCTTGGGCTCTCATGAACCT

>Bacillus\_Fam\_1131\_52\_1 Nr. of seq. 1 Alignment length(with gaps) = 52  
Alignment score = 0.000000  
GCF\_000759675.1\_ASM75967v1\_genomic.fna\_158:33598-34014 Satlength=417 Nr  
of Repeats=8 RepeatLength=52 seed=TGTGACCAAA Num.seqs=8  
Similarity=0.889194  
0 TGTGACCAAAACTCATGGATGAAACTATCAAAATGGTCACAAGAAGGGTCGC

\*\*\*\*\*  
Consensus:

TGTGACCAAAACTCATGGATGAAACTATCAAAATGGTCACAAGAAGGGTCGC

>Bacillus\_Fam\_1132\_52\_1 Nr. of seq. 1 Alignment length(with gaps) = 52  
Alignment score = 0.000000

GCF\_000787375.1\_ASM78737v1\_genomic.fna\_1:349174-349686 Satlength=513 Nr  
of Repeats=4 RepeatLength=52 seed=CTTGCTCTTT Num.seqs=3  
Similarity=0.880342  
0 CTTGCTCTTTTCGGTAGGCAATACATCTTGTTGTCTACTCTTATTGCGGCT

\*\*\*\*\*  
Consensus:

CTTGCTCTTTTCGGTAGGCAATACATCTTGTTGTCTACTCTTATTGCGGCT

>Bacillus\_Fam\_1133\_52\_1 Nr. of seq. 1 Alignment length(with gaps) = 52  
Alignment score = 0.000000  
GCF\_000787375.1\_ASM78737v1\_genomic.fna\_2:125037-125349 Satlength=313 Nr  
of Repeats=5 RepeatLength=52 seed=CTACCCAAAT Num.seqs=4  
Similarity=0.790598  
0 CTACCCAAATACGGGGGACCTCTCAAGTTCGGGCGCCATCACATCCCTTTGA

\*\*\*\*\*  
Consensus:

CTACCCAAATACGGGGGACCTCTCAAGTTCGGGCGCCATCACATCCCTTTGA

>Bacillus\_Fam\_1134\_52\_1 Nr. of seq. 1 Alignment length(with gaps) = 52  
Alignment score = 0.000000  
GCF\_000787375.1\_ASM78737v1\_genomic.fna\_2:172325-172585 Satlength=261 Nr  
of Repeats=5 RepeatLength=52 seed=CTCTTTTCGG Num.seqs=5  
Similarity=0.853846  
26 TTGACTCCCTTCCTCACNCCTCCTCACTCTTTTCGGTAGCCATTCCACCCCT

\*\*\*\*\*  
Consensus:

CTCTTTTCGGTAGCCATTCCACCCCTTTGACTCCCTTCCTCACNCCTCCTCA

>Bacillus\_Fam\_1135\_52\_1 Nr. of seq. 1 Alignment length(with gaps) = 52  
Alignment score = 0.000000  
GCF\_000787375.1\_ASM78737v1\_genomic.fna\_3:17378-17794 Satlength=417 Nr of  
Repeats=7 RepeatLength=52 seed=TTGCTTCTC Num.seqs=6 Similarity=0.875472  
0 TTGCTTCTCTTCGGGAGTCAACACCCTCCTTTAGCTACCGTTCTCTTTGTC

\*\*\*\*\*  
Consensus:

TTGCTTCTCTTCGGGAGTCAACACCCTCCTTTAGCTACCGTTCTCTTTGTC

>Bacillus\_Fam\_1136\_52\_1 Nr. of seq. 1 Alignment length(with gaps) = 52  
Alignment score = 0.000000  
GCF\_000787375.1\_ASM78737v1\_genomic.fna\_4:209708-209916 Satlength=209 Nr  
of Repeats=4 RepeatLength=52 seed=ACATTCGGGC Num.seqs=4  
Similarity=0.846154  
0 ACATTCGGGCTCCAGATCCCTCTTCTGCTTCCCTACTTTTCCCATTCCCACC

\*\*\*\*\*  
Consensus:

ACATTCGGGCTCCAGATCCCTCTTCTGCTTCCCTACTTTTCCCATTCCCACC

>Bacillus\_Fam\_1137\_52\_1 Nr. of seq. 1 Alignment length(with gaps) = 52  
Alignment score = 0.000000  
GCF\_000787375.1\_ASM78737v1\_genomic.fna\_16:30256-30516 Satlength=261 Nr of  
Repeats=5 RepeatLength=52 seed=ACGGGAGCCA Num.seqs=5 Similarity=0.912821  
0 ACGGGAGCCATTCCCTTCCTTTGACTACCCAAATCCNGTTCGGTCCTTCTGC

\*\*\*\*\*  
Consensus:

ACGGGAGCCATTCCCTTCCTTTGACTACCCAAATCCNGTTCGGTCCTTCTGC

>Bacillus\_Fam\_1138\_52\_1 Nr. of seq. 1 Alignment length(with gaps) = 52  
Alignment score = 0.000000  
GCF\_000787375.1\_ASM78737v1\_genomic.fna\_22:64949-65313 Satlength=365 Nr of  
Repeats=7 RepeatLength=52 seed=TCGTTGACTA Num.seqs=7 Similarity=0.693710  
0 TCGTTGACTACCCAAATTTGTGATNGACTCAGAGTTCGAGTGCCANTGNGCT

\*\*\*\*\*  
Consensus:

TCGTTGACTACCCAAATTTGTGATNGACTCAGAGTTCGAGTGCCANTGNGCT

>Bacillus\_Fam\_1139\_52\_1 Nr. of seq. 1 Alignment length(with gaps) = 52  
Alignment score = 0.000000  
GCF\_000787375.1\_ASM78737v1\_genomic.fna\_40:17325-17638 Satlength=314 Nr of  
Repeats=6 RepeatLength=52 seed=AGTCAATACA Num.seqs=5 Similarity=0.841026  
0 AGTCAATACACCTTATTGGCTACCGTCCACTCCTCCTCCCTCGCTTTTCGGG

\*\*\*\*\*  
Consensus:

AGTCAATACACCTTATTGGCTACCGTCCACTCCTCCTCCCTCGCTTTTCGGG

>Bacillus\_Fam\_1140\_52\_1 Nr. of seq. 1 Alignment length(with gaps) = 52  
Alignment score = 0.000000  
GCF\_000787375.1\_ASM78737v1\_genomic.fna\_56:13660-13868 Satlength=209 Nr of  
Repeats=4 RepeatLength=52 seed=TTTCGGTAGT Num.seqs=4 Similarity=0.839099  
0 TTTCGGTAGTCAACCCTTCTCTTTGTCTACCAAAATCCTCGCCCTCTCCCTT

\*\*\*\*\*  
Consensus:

TTTCGGTAGTCAACCCTTCTCTTTGTCTACCAAAATCCTCGCCCTCTCCCTT

>Bacillus\_Fam\_1141\_52\_1 Nr. of seq. 1 Alignment length(with gaps) = 52  
Alignment score = 0.000000  
GCF\_000813125.1\_ASM81312v1\_genomic.fna\_8:33426-33634 Satlength=209 Nr of  
Repeats=4 RepeatLength=52 seed=TAGACATTTT Num.seqs=4 Similarity=0.880342  
0 TAGACATTTTGTAGTCAATTGGCATTGAAATGTACATTAAACAAGGTTTTT

\*\*\*\*\*

Consensus:

TAGACATTTTGTAGTCAATTGGCATTTCGAAATGTACATTAAACAAGGTTTTT

>Bacillus\_Fam\_1142\_52\_1 Nr. of seq. 1 Alignment length(with gaps) = 52  
Alignment score = 0.000000  
GCF\_000813125.1\_ASM81312v1\_genomic.fna\_55:28017-28329 Satlength=313 Nr of  
Repeats=6 RepeatLength=52 seed=TCATTTGGGT Num.seqs=6 Similarity=0.830769  
0 TCATTTGGGTAAGAGGAAAGCCCCTGCATTGCCCGAAAAAGCGCCAACTCCA

\*\*\*\*\*

Consensus:

TCATTTGGGTAAGAGGAAAGCCCCTGCATTGCCCGAAAAAGCGCCAACTCCA

>Bacillus\_Fam\_1143\_52\_1 Nr. of seq. 1 Alignment length(with gaps) = 52  
Alignment score = 0.000000  
GCF\_000813125.1\_ASM81312v1\_genomic.fna\_62:7988-8195 Satlength=208 Nr of  
Repeats=4 RepeatLength=52 seed=GATGACGGAC Num.seqs=3 Similarity=0.758910  
51 ATGACGGACACTTTCCCAGCGTTTTGGGCTATTTCTGTCCGTCATAGGCTGG

\*\*\*\*\*

Consensus:

GATGACGGACACTTTCCCAGCGTTTTGGGCTATTTCTGTCCGTCATAGGCTG

>Bacillus\_Fam\_1144\_52\_1 Nr. of seq. 1 Alignment length(with gaps) = 52  
Alignment score = 0.000000  
GCF\_000813125.1\_ASM81312v1\_genomic.fna\_65:29-237 Satlength=209 Nr of  
Repeats=4 RepeatLength=52 seed=AAAAAGGGTA Num.seqs=4 Similarity=0.905983  
0 AAAAAGGGTAAAAGGAAAGGCTCTGCATTACCCGAAAATGCTGGAGAGAAGT

\*\*\*\*\*

Consensus:

AAAAAGGGTAAAAGGAAAGGCTCTGCATTACCCGAAAATGCTGGAGAGAAGT

>Bacillus\_Fam\_1145\_52\_1 Nr. of seq. 1 Alignment length(with gaps) = 52  
Alignment score = 0.000000  
GCF\_000813125.1\_ASM81312v1\_genomic.fna\_67:47637-47845 Satlength=209 Nr of  
Repeats=4 RepeatLength=52 seed=TGTCCATTAA Num.seqs=4 Similarity=0.910256  
0 TGTCCATTAAATGCACTTTCTTAGACATTTTCGGTTTGGAACATCATGCTGAAA

\*\*\*\*\*

Consensus:

TGTCCATTAAATGCACTTTCTTAGACATTTTCGGTTTGGAACATCATGCTGAAA

>Bacillus\_Fam\_1146\_52\_1 Nr. of seq. 1 Alignment length(with gaps) = 52  
Alignment score = 0.000000  
GCF\_000813125.1\_ASM81312v1\_genomic.fna\_88:82704-82913 Satlength=210 Nr of  
Repeats=4 RepeatLength=52 seed=TTTTGTCCGA Num.seqs=3 Similarity=0.897436  
0 TTTTGTCCGAACCTGCCCTACTTCAGACAATTTCCGCTTGTACGCCGAGA



\*\*\*\*\*

Consensus:

TTTTGTCCGAACCTGCCCCTACTTCAGACAATTTCCGCTGTACGGCCGAGA

>Bacillus\_Fam\_1147\_52\_1 Nr. of seq. 1 Alignment length(with gaps) = 52

Alignment score = 0.000000

GCF\_000813125.1\_ASM81312v1\_genomic.fna\_92:44793-45053 Satlength=261 Nr of Repeats=5 RepeatLength=52 seed=TTAATAGACA Num.seqs=5 Similarity=0.846541

0 TTAATAGACATTTTGACGTCCGTTACTCTTCGAAATGTCTAAGAAGTGCTGT

\*\*\*\*\*

Consensus:

TTAATAGACATTTTGACGTCCGTTACTCTTCGAAATGTCTAAGAAGTGCTGT

>Bacillus\_Fam\_1148\_52\_1 Nr. of seq. 1 Alignment length(with gaps) = 52

Alignment score = 0.000000

GCF\_000813125.1\_ASM81312v1\_genomic.fna\_102:37405-37665 Satlength=261 Nr of Repeats=4 RepeatLength=52 seed=AAACAGGTCA Num.seqs=3

Similarity=0.551440

0 AAACAGGTCACCAATACCCNTGATTGGTGACCTAAAAATCCATATTTCCGNA

\*\*\*\*\*

Consensus:

AAACAGGTCACCAATACCCNTGATTGGTGACCTAAAAATCCATATTTCCGNA

>Bacillus\_Fam\_1149\_52\_1 Nr. of seq. 1 Alignment length(with gaps) = 52

Alignment score = 0.000000

GCF\_000813125.1\_ASM81312v1\_genomic.fna\_103:5511-5928 Satlength=418 Nr of Repeats=7 RepeatLength=52 seed=GTTCGGACAT Num.seqs=6 Similarity=0.838155

0 GTTCGGACATTTCAACGGCCTCTTCATTGAGTTTTGTCCGAAGTAGGATCAA

\*\*\*\*\*

Consensus:

GTTCGGACATTTCAACGGCCTCTTCATTGAGTTTTGTCCGAAGTAGGATCAA

>Bacillus\_Fam\_1150\_52\_1 Nr. of seq. 1 Alignment length(with gaps) = 52

Alignment score = 0.000000

GCF\_000813125.1\_ASM81312v1\_genomic.fna\_105:68233-68494 Satlength=262 Nr of Repeats=5 RepeatLength=52 seed=GAAAAGCTGT Num.seqs=4

Similarity=0.580939

0 GAAAAGCTGTCAAGATTATCCCGGAATTATGACAGGCTCAAGCCCATAAAGC

\*\*\*\*\*

Consensus:

GAAAAGCTGTCAAGATTATCCCGGAATTATGACAGGCTCAAGCCCATAAAGC

>Bacillus\_Fam\_1151\_52\_1 Nr. of seq. 1 Alignment length(with gaps) = 52

Alignment score = 0.000000

GCF\_000813125.1\_ASM81312v1\_genomic.fna\_121:45604-46123 Satlength=520 Nr  
of Repeats=10 RepeatLength=52 seed=GTTCGGACAA Num.seqs=9  
Similarity=0.829060  
0 GTTCGGACAAATCATCGGGAGTGACGGTACTTTTTGTCCGAAGGTGACCCAT

\*\*\*\*\*  
Consensus:

GTTCGGACAAATCATCGGGAGTGACGGTACTTTTTGTCCGAAGGTGACCCAT

>Bacillus\_Fam\_1152\_52\_1 Nr. of seq. 1 Alignment length(with gaps) = 52  
Alignment score = 0.000000  
GCF\_000813125.1\_ASM81312v1\_genomic.fna\_129:124410-124826 Satlength=417 Nr  
of Repeats=9 RepeatLength=52 seed=TCCCTCATCC Num.seqs=7  
Similarity=0.846154 0  
TCCCTCATCCGGGCACATATTTTCCCTTTATGTGCCCCGTCTCCCTTCATCT

\*\*\*\*\*  
Consensus:

TCCCTCATCCGGGCACATATTTTCCCTTTATGTGCCCCGTCTCCCTTCATCT

>Bacillus\_Fam\_1153\_52\_1 Nr. of seq. 1 Alignment length(with gaps) = 52  
Alignment score = 0.000000  
GCF\_000832905.1\_ASM83290v1\_genomic.fna\_1:2082727-2083091 Satlength=365 Nr  
of Repeats=7 RepeatLength=52 seed=TATGAAGGAC Num.seqs=7  
Similarity=0.817011 0  
TATGAAGGACATTTTGGGGGCGNGGGATTCTCCTTTTGTCTTTCATCCCTGT

\*\*\*\*\*  
Consensus:

TATGAAGGACATTTTGGGGGCGNGGGATTCTCCTTTTGTCTTTCATCCCTGT

>Bacillus\_Fam\_1154\_52\_1 Nr. of seq. 1 Alignment length(with gaps) = 52  
Alignment score = 0.000000  
GCF\_000934845.1\_ASM93484v1\_genomic.fna\_1:28106-28314 Satlength=209 Nr of  
Repeats=4 RepeatLength=52 seed=TTATTTTGAC Num.seqs=4 Similarity=0.881027  
7 AGAGAGGTTATTTTGACAACTTTCAGGTGAAAAGGGCAAAGTTGTCAAGAA

\*\*\*\*\*  
Consensus:

TTATTTTGACAACTTTCAGGTGAAAAGGGCAAAGTTGTCAAGAAAGAGAGG

>Bacillus\_Fam\_1155\_52\_1 Nr. of seq. 1 Alignment length(with gaps) = 52  
Alignment score = 0.000000  
GCF\_000986785.1\_ASM98678v1\_genomic.fna\_6:11778-12141 Satlength=364 Nr of  
Repeats=7 RepeatLength=52 seed=TGATAGGCGC Num.seqs=6 Similarity=0.801467  
0 TGATAGGCGCCCGTGGCGGTTGAAATAGGAGTTGGCGGTCGCCAATAGGGT

\*\*\*\*\*  
Consensus:

TGATAGGCGCCCGTGGCGGTTGAAAATAGGAGTTGGCGGTCGCCAATAGGGT

>Bacillus\_Fam\_1156\_52\_1 Nr. of seq. 1 Alignment length(with gaps) = 52  
Alignment score = 0.000000  
GCF\_000986785.1\_ASM98678v1\_genomic.fna\_15:1-313 Satlength=313 Nr of  
Repeats=6 RepeatLength=52 seed=GGGCACTGAG Num.seqs=6 Similarity=0.801258  
0 GGGCACTGAGAACACCTGTCAGCACCCAAAATCCCTGGCCCCCTCCTAAAAAT

\*\*\*\*\*  
Consensus:

GGGCACTGAGAACACCTGTCAGCACCCAAAATCCCTGGCCCCCTCCTAAAAAT

>Bacillus\_Fam\_1157\_52\_1 Nr. of seq. 1 Alignment length(with gaps) = 52  
Alignment score = 0.000000  
GCF\_000986785.1\_ASM98678v1\_genomic.fna\_19:60234-60494 Satlength=261 Nr of  
Repeats=5 RepeatLength=52 seed=TGTCAGTGCC Num.seqs=5 Similarity=0.675472  
0 TGTCAGTGCCCCAAAAGTGGAGCAGNTCGTNAAAAAGGTTACTGAGGGTCGN

\*\*\*\*\*  
Consensus:

TGTCAGTGCCCCAAAAGTGGAGCAGNTCGTNAAAAAGGTTACTGAGGGTCGN

>Bacillus\_Fam\_1158\_52\_1 Nr. of seq. 1 Alignment length(with gaps) = 52  
Alignment score = 0.000000  
GCF\_000986785.1\_ASM98678v1\_genomic.fna\_31:25184-25444 Satlength=261 Nr of  
Repeats=5 RepeatLength=52 seed=CCTCTTTTTC Num.seqs=5 Similarity=0.887179  
0 CCTCTTTTTCGGTAAACTCTCGGAAAAAGGTACCTGACAGGCTGCCTCAGTA

\*\*\*\*\*  
Consensus:

CCTCTTTTTCGGTAAACTCTCGGAAAAAGGTACCTGACAGGCTGCCTCAGTA

>Bacillus\_Fam\_1159\_52\_1 Nr. of seq. 1 Alignment length(with gaps) = 52  
Alignment score = 0.000000  
GCF\_000986785.1\_ASM98678v1\_genomic.fna\_38:27020-27332 Satlength=313 Nr of  
Repeats=6 RepeatLength=52 seed=TTGGTCGTCC Num.seqs=6 Similarity=0.841026  
0 TTGGTCGTCCATACCCGATGGAGGCCCGTTTTTCAGAATCAGCTTCAGTA

\*\*\*\*\*  
Consensus:

TTGGTCGTCCATACCCGATGGAGGCCCGTTTTTCAGAATCAGCTTCAGTA

>Bacillus\_Fam\_1160\_52\_1 Nr. of seq. 1 Alignment length(with gaps) = 52  
Alignment score = 0.000000  
GCF\_000986785.1\_ASM98678v1\_genomic.fna\_100:49503-49815 Satlength=313 Nr of  
Repeats=6 RepeatLength=52 seed=GGGCTTCCAT Num.seqs=6  
Similarity=0.876923  
0 GGGCTTCCATCCACTTGATGGAGACCTTTTTTGCGGCTTCCTGCGAAAAC

\*\*\*\*\*

Consensus:

GGGCTTCCATCCACTTGATGGAGGACCTTTTTTGGCGCTTCCTGCGAAAAC

>Bacillus\_Fam\_1161\_52\_1 Nr. of seq. 1 Alignment length(with gaps) = 52  
Alignment score = 0.000000

GCF\_000986785.1\_ASM98678v1\_genomic.fna\_101:18847-19056 Satlength=210 Nr  
of Repeats=4 RepeatLength=52 seed=TTTTTTGGTG Num.seqs=3  
Similarity=0.700855

10 NTCAGAGCCCTTTTTTGGTGGTTGCATGAATTTTGGTACTGAGGAGGAGT

\*\*\*\*\*

Consensus:

TTTTTTGGTGGTTTGCATGAATTTTGGTACTGAGGAGGAGTNTCAGAGCCC

>Bacillus\_Fam\_1162\_52\_1 Nr. of seq. 1 Alignment length(with gaps) = 52  
Alignment score = 0.000000

GCF\_001278705.1\_ASM127870v1\_genomic.fna\_1:2331510-2331718 Satlength=209  
Nr of Repeats=4 RepeatLength=52 seed=GTCCTTCATC Num.seqs=4  
Similarity=0.854701

0

GTCCTTCATCCAGGGTCTGAAGGACATAACAACACTAGTGATCACGTGAATT

\*\*\*\*\*

Consensus:

GTCCTTCATCCAGGGTCTGAAGGACATAACAACACTAGTGATCACGTGAATT

>Bacillus\_Fam\_1163\_52\_1 Nr. of seq. 1 Alignment length(with gaps) = 52  
Alignment score = 0.000000

GCF\_001315045.1\_ASM131504v1\_genomic.fna\_43:27341-27549 Satlength=209 Nr  
of Repeats=4 RepeatLength=52 seed=TAGTCCGAAG Num.seqs=4  
Similarity=0.846154

0 TAGTCCGAAGGCAGGTCAAGTTCGGACAGAAAGCAGACATCAAAGCGCAAAC

\*\*\*\*\*

Consensus:

TAGTCCGAAGGCAGGTCAAGTTCGGACAGAAAGCAGACATCAAAGCGCAAAC

>Bacillus\_Fam\_1164\_52\_1 Nr. of seq. 1 Alignment length(with gaps) = 52  
Alignment score = 0.000000

GCF\_001315165.1\_ASM131516v1\_genomic.fna\_82:7303-7614 Satlength=312 Nr of  
Repeats=6 RepeatLength=52 seed=TTCGGCCAAA Num.seqs=5 Similarity=0.787179

0 TTCGGCCAAATCAGGAGCGNCGAGCCGTTGAAATGTCCGAAGTTGGTGTAGG

\*\*\*\*\*

Consensus:

TTCGGCCAAATCAGGAGCGNCGAGCCGTTGAAATGTCCGAAGTTGGTGTAGG

>Bacillus\_Fam\_1165\_52\_1 Nr. of seq. 1 Alignment length(with gaps) = 52  
Alignment score = 0.000000  
GCF\_001375535.1\_Bacillus\_niameyensis\_genomic.fna\_6:2141488-2141852  
Satlength=365 Nr of Repeats=7 RepeatLength=52 seed=CATTTTCCA Num.seqs=7  
Similarity=0.792430 0  
CATTTTCCAGGGCTATGGTCTATGACAGACGTTATCATGACCCGTTGGCTG

\*\*\*\*\*  
Consensus:

CATTTTCCAGGGCTATGGTCTATGACAGACGTTATCATGACCCGTTGGCTG

>Bacillus\_Fam\_1166\_52\_1 Nr. of seq. 1 Alignment length(with gaps) = 52  
Alignment score = 0.000000  
GCF\_001375535.1\_Bacillus\_niameyensis\_genomic.fna\_6:2366660-2366868  
Satlength=209 Nr of Repeats=4 RepeatLength=52 seed=CTCTCATGGA Num.seqs=4  
Similarity=0.927350 0  
CTCTCATGGACCTTTTCGCATGTAAAAGTCGCTGCAATGGGACACGACAACGA

\*\*\*\*\*  
Consensus:

CTCTCATGGACCTTTTCGCATGTAAAAGTCGCTGCAATGGGACACGACAACGA

>Bacillus\_Fam\_1167\_52\_1 Nr. of seq. 1 Alignment length(with gaps) = 52  
Alignment score = 0.000000  
GCF\_001375535.1\_Bacillus\_niameyensis\_genomic.fna\_6:2468093-2468561  
Satlength=469 Nr of Repeats=9 RepeatLength=52 seed=GAATCGTTAC Num.seqs=9  
Similarity=0.769204 0  
GAATCGTTACCGTCATGCGANGCTTTCAAGNCTAACGGGCACGATTCACTTC

\*\*\*\*\*  
Consensus:

GAATCGTTACCGTCATGCGANGCTTTCAAGNCTAACGGGCACGATTCACTTC

>Bacillus\_Fam\_1168\_52\_1 Nr. of seq. 1 Alignment length(with gaps) = 52  
Alignment score = 0.000000  
GCF\_001375535.1\_Bacillus\_niameyensis\_genomic.fna\_6:2662491-2662803  
Satlength=313 Nr of Repeats=6 RepeatLength=52 seed=CCTCTCATGT Num.seqs=6  
Similarity=0.854701 0  
CCTCTCATGTCCCGTATCATTGAAAAAGGATGTGCTTGGGACATGAGACCA

\*\*\*\*\*  
Consensus:

CCTCTCATGTCCCGTATCATTGAAAAAGGATGTGCTTGGGACATGAGACCA

>Bacillus\_Fam\_1169\_52\_1 Nr. of seq. 1 Alignment length(with gaps) = 52  
Alignment score = 0.000000  
GCF\_001375535.1\_Bacillus\_niameyensis\_genomic.fna\_6:3404396-3408244  
Satlength=3849 Nr of Repeats=74 RepeatLength=52 seed=CTATTCGCCC  
Num.seqs=74 Similarity=0.942760 0  
CTATTCGCCCCGAGGAGGAAGAAAAGTGTATCTAGGGGTAGAATAGGACGTCT

\*\*\*\*\*

Consensus:

CTATTCGCCCCGAGGAGGAAGAAAAGTGTATCTAGGGGTAGAATAGGACGTCT

>Bacillus\_Fam\_1170\_52\_1 Nr. of seq. 1 Alignment length(with gaps) = 52  
Alignment score = 0.000000

GCF\_001375535.1\_Bacillus\_niameyensis\_genomic.fna\_6:3437377-3438313

Satlength=937 Nr of Repeats=18 RepeatLength=52 seed=GGTCGAATAG

Num.seqs=16 Similarity=0.812631

0

GGTCGAATAGGGCGTCTCTATTCGCCCCGAAGCGCCAGGTCGAGTCGTTCAAA

\*\*\*\*\*

Consensus:

GGTCGAATAGGGCGTCTCTATTCGCCCCGAAGCGCCAGGTCGAGTCGTTCAAA

>Bacillus\_Fam\_1171\_52\_1 Nr. of seq. 1 Alignment length(with gaps) = 52  
Alignment score = 0.000000

GCF\_001375535.1\_Bacillus\_niameyensis\_genomic.fna\_6:3623417-3629501

Satlength=6085 Nr of Repeats=99 RepeatLength=52 seed=CCTTGAATGG

Num.seqs=81 Similarity=0.818276

0

CCTTGAATGGGACGTGATGAGTGTTATCAAAGCCCGATCGCCANCTTTTTTN

\*\*\*\*\*

Consensus:

CCTTGAATGGGACGTGATGAGTGTTATCAAAGCCCGATCGCCANCTTTTTTN

>Bacillus\_Fam\_1172\_52\_1 Nr. of seq. 1 Alignment length(with gaps) = 52  
Alignment score = 0.000000

GCF\_001375535.1\_Bacillus\_niameyensis\_genomic.fna\_6:4106934-4107141

Satlength=208 Nr of Repeats=4 RepeatLength=52 seed=ACGGTAACGA Num.seqs=3

Similarity=0.863248

0

ACGGTAACGATTGAGGCCGAATCGTTCCCGCACCGTGCTATTTTTGGGAGTT

\*\*\*\*\*

Consensus:

ACGGTAACGATTGAGGCCGAATCGTTCCCGCACCGTGCTATTTTTGGGAGTT

>Bacillus\_Fam\_1173\_52\_1 Nr. of seq. 1 Alignment length(with gaps) = 52  
Alignment score = 0.000000

GCF\_001420595.1\_ASM142059v1\_genomic.fna\_11:959883-960403 Satlength=521 Nr

of Repeats=10 RepeatLength=52 seed=CGATTGAGTT Num.seqs=10

Similarity=0.834032

0

CGATTGAGTTCAGTTTATCCAAAATTACCCGCTAACGGGAACCAATGAGCT

\*\*\*\*\*

Consensus:

CGATTGAGTTCAGTTTATCCAAAATTACCCGCTAACGGGAACCAATGAGCT

>Bacillus\_Fam\_1174\_52\_1 Nr. of seq. 1 Alignment length(with gaps) = 52  
Alignment score = 0.000000  
GCF\_001420595.1\_ASM142059v1\_genomic.fna\_11:1190597-1190910 Satlength=314  
Nr of Repeats=6 RepeatLength=52 seed=TTCGGACAAG Num.seqs=5  
Similarity=0.779487 0  
TTCGGACAAGCCCAGGTGATTTTGAGCAATCNTAGTCCGAATAGCCGTCGAG

\*\*\*\*\*  
Consensus:

TTCGGACAAGCCCAGGTGATTTTGAGCAATCNTAGTCCGAATAGCCGTCGAG

>Bacillus\_Fam\_1175\_52\_1 Nr. of seq. 1 Alignment length(with gaps) = 52  
Alignment score = 0.000000  
GCF\_001420595.1\_ASM142059v1\_genomic.fna\_11:1214278-1214746 Satlength=469  
Nr of Repeats=9 RepeatLength=52 seed=GTCGCCAATA Num.seqs=9  
Similarity=0.757512 0  
GTCGCCAATAAGGTGTATTGGTACCCGAAACTCTACTATATTTAATAAAACG

\*\*\*\*\*  
Consensus:

GTCGCCAATAAGGTGTATTGGTACCCGAAACTCTACTATATTTAATAAAACG

>Bacillus\_Fam\_1176\_52\_1 Nr. of seq. 1 Alignment length(with gaps) = 52  
Alignment score = 0.000000  
GCF\_001420595.1\_ASM142059v1\_genomic.fna\_11:1222858-1223222 Satlength=365  
Nr of Repeats=7 RepeatLength=52 seed=GACAACCACA Num.seqs=7  
Similarity=0.880342 0  
GACAACCACACTCAAAATTCGGCTGAAGAAGTCCGAAGTGGTAGTGGGTTC

\*\*\*\*\*  
Consensus:

GACAACCACACTCAAAATTCGGCTGAAGAAGTCCGAAGTGGTAGTGGGTTC

>Bacillus\_Fam\_1177\_52\_1 Nr. of seq. 1 Alignment length(with gaps) = 52  
Alignment score = 0.000000  
GCF\_001420595.1\_ASM142059v1\_genomic.fna\_11:1804770-1804979 Satlength=210  
Nr of Repeats=4 RepeatLength=52 seed=AGGGAACCAA Num.seqs=3  
Similarity=0.842767 0  
AGGGAACCAATGACTCCTATTGATACCTCAAACAACGCTAATTTGCCAAATA

\*\*\*\*\*  
Consensus:

AGGGAACCAATGACTCCTATTGATACCTCAAACAACGCTAATTTGCCAAATA

>Bacillus\_Fam\_1178\_52\_1 Nr. of seq. 1 Alignment length(with gaps) = 52  
Alignment score = 0.000000  
GCF\_001420595.1\_ASM142059v1\_genomic.fna\_11:2856360-2856620 Satlength=261  
Nr of Repeats=5 RepeatLength=52 seed=GGAAACAAGC Num.seqs=5  
Similarity=0.835897 0  
GGAAACAAGCAGCCCTATTGAGTACACTATTCACTCGAATTCTTTAAAAATG

\*\*\*\*\*

Consensus:

GGAAACAAGCAGCCCTATTGAGTACACTATTCACTCGAATTCTTTAAAAATG

>Bacillus\_Fam\_1179\_52\_1 Nr. of seq. 1 Alignment length(with gaps) = 52  
Alignment score = 0.000000  
GCF\_001420595.1\_ASM142059v1\_genomic.fna\_11:3118694-3118954 Satlength=261  
Nr of Repeats=5 RepeatLength=52 seed=TGCTCTGAACT Num.seqs=5  
Similarity=0.787179 0  
TGCTCTGAACTTGACTGGTGTTCGGACTCGATTACCTTAAAAATCGCCATTGC

\*\*\*\*\*

Consensus:

TGCTCTGAACTTGACTGGTGTTCGGACTCGATTACCTTAAAAATCGCCATTGC

>Bacillus\_Fam\_1180\_52\_1 Nr. of seq. 1 Alignment length(with gaps) = 52  
Alignment score = 0.000000  
GCF\_001420595.1\_ASM142059v1\_genomic.fna\_11:3296695-3296903 Satlength=209  
Nr of Repeats=4 RepeatLength=52 seed=CTTTTTTCTC Num.seqs=4  
Similarity=0.816239 0  
CTTTTTTCTCCAGTGTTCGGTCAACAATAACGGCGATTGGATACCCTTCTGT

\*\*\*\*\*

Consensus:

CTTTTTTCTCCAGTGTTCGGTCAACAATAACGGCGATTGGATACCCTTCTGT

>Bacillus\_Fam\_1181\_52\_1 Nr. of seq. 1 Alignment length(with gaps) = 52  
Alignment score = 0.000000  
GCF\_001420595.1\_ASM142059v1\_genomic.fna\_11:3743605-3744124 Satlength=520  
Nr of Repeats=10 RepeatLength=52 seed=TACTTCAGAC Num.seqs=9  
Similarity=0.759971 0  
TACTTCAGACTTCTTTTNCGCAATCAAGGGCTAACCTGTCCGAACCTGAGGC

\*\*\*\*\*

Consensus:

TACTTCAGACTTCTTTTNCGCAATCAAGGGCTAACCTGTCCGAACCTGAGGC

>Bacillus\_Fam\_1182\_52\_1 Nr. of seq. 1 Alignment length(with gaps) = 52  
Alignment score = 0.000000  
GCF\_001420595.1\_ASM142059v1\_genomic.fna\_11:3931578-3931889 Satlength=312  
Nr of Repeats=6 RepeatLength=52 seed=GGCTATTGAT Num.seqs=5  
Similarity=0.892308 0  
GGCTATTGATAACCTTTTTTGCTTTTTTTTACAGGAAAACTGAACTCAATAGA

\*\*\*\*\*

Consensus:

GGCTATTGATAACCTTTTTTGCTTTTTTTTACAGGAAAACTGAACTCAATAGA



>Bacillus\_Fam\_1183\_52\_1 Nr. of seq. 1 Alignment length(with gaps) = 52  
Alignment score = 0.000000  
GCF\_001420595.1\_ASM142059v1\_genomic.fna\_11:4472676-4473040 Satlength=365  
Nr of Repeats=7 RepeatLength=52 seed=TCTTGTTTCAG Num.seqs=7  
Similarity=0.801737 0  
TCTTGTTTCAGACTCGATCTCTTATTTTCACCAAACCTGTCCGAACCTTGAC

\*\*\*\*\*  
Consensus:

TCTTGTTTCAGACTCGATCTCTTATTTTCACCAAACCTGTCCGAACCTTGAC

>Bacillus\_Fam\_1184\_52\_1 Nr. of seq. 1 Alignment length(with gaps) = 52  
Alignment score = 0.000000  
GCF\_001420595.1\_ASM142059v1\_genomic.fna\_11:4647606-4648228 Satlength=623  
Nr of Repeats=12 RepeatLength=52 seed=CCTAACCTGT Num.seqs=10  
Similarity=0.855556 0  
CCTAACCTGTCCGAACCTCATCCCAAGTTCGGACTTCTTTGCTCTTGAATCCT

\*\*\*\*\*  
Consensus:

CCTAACCTGTCCGAACCTCATCCCAAGTTCGGACTTCTTTGCTCTTGAATCCT

>Bacillus\_Fam\_1185\_52\_1 Nr. of seq. 1 Alignment length(with gaps) = 52  
Alignment score = 0.000000  
GCF\_001420595.1\_ASM142059v1\_genomic.fna\_12:256320-256580 Satlength=261 Nr  
of Repeats=5 RepeatLength=52 seed=AGAAAAGCGA Num.seqs=5  
Similarity=0.861538 0  
AGAAAAGCGAACTCAACAAGCGTTATTGGTTCCCGAAAACCTAGCAGAAAGGC

\*\*\*\*\*  
Consensus:

AGAAAAGCGAACTCAACAAGCGTTATTGGTTCCCGAAAACCTAGCAGAAAGGC

>Bacillus\_Fam\_1186\_52\_1 Nr. of seq. 1 Alignment length(with gaps) = 52  
Alignment score = 0.000000  
GCF\_001420715.1\_ASM142071v1\_genomic.fna\_22:194482-194899 Satlength=418 Nr  
of Repeats=8 RepeatLength=52 seed=AGATGTCCTT Num.seqs=7  
Similarity=0.699001 0  
AGATGTCCTTCATCAATGAAATGAAGGCCAAGNTATAGGGTTTCTACTGTC

\*\*\*\*\*  
Consensus:

AGATGTCCTTCATCAATGAAATGAAGGCCAAGNTATAGGGTTTCTACTGTC

>Bacillus\_Fam\_1187\_52\_1 Nr. of seq. 1 Alignment length(with gaps) = 52  
Alignment score = 0.000000  
GCF\_001420715.1\_ASM142071v1\_genomic.fna\_22:204926-205656 Satlength=731 Nr  
of Repeats=14 RepeatLength=52 seed=TGAATTGTTC Num.seqs=13  
Similarity=0.747702 0  
TGAATTGTTCCTTCATCAACACCATCCACGATTGCGGTCACGATACNTCG

\*\*\*\*\*

Consensus:

TGAATTGTTCCCGTTCATCAACACCATCCACGATTGCGGTCACGATACNTCG

>Bacillus\_Fam\_1188\_52\_1 Nr. of seq. 1 Alignment length(with gaps) = 52

Alignment score = 0.000000

GCF\_001420715.1\_ASM142071v1\_genomic.fna\_22:348610-349234 Satlength=625 Nr

of Repeats=12 RepeatLength=52 seed=AGAGGAAGTA Num.seqs=12

Similarity=0.812655

0

AGAGGAAGTATTGTGCCCGAAAGGGAAAGCTCGAGAAGAAACGGGAACAAA

\*\*\*\*\*

Consensus:

AGAGGAAGTATTGTGCCCGAAAGGGAAAGCTCGAGAAGAAACGGGAACAAA

>Bacillus\_Fam\_1189\_52\_1 Nr. of seq. 1 Alignment length(with gaps) = 52

Alignment score = 0.000000

GCF\_001420715.1\_ASM142071v1\_genomic.fna\_22:408865-409073 Satlength=209 Nr

of Repeats=4 RepeatLength=52 seed=GTATTGTTCC Num.seqs=4

Similarity=0.734277

0

GTATTGTTCCCATATCCTCTGGGAAAGACAGAAACGGTAACGATTAGTTGA

\*\*\*\*\*

Consensus:

GTATTGTTCCCATATCCTCTGGGAAAGACAGAAACGGTAACGATTAGTTGA

>Bacillus\_Fam\_1190\_52\_1 Nr. of seq. 1 Alignment length(with gaps) = 52

Alignment score = 0.000000

GCF\_001420715.1\_ASM142071v1\_genomic.fna\_22:580070-580538 Satlength=469 Nr

of Repeats=9 RepeatLength=52 seed=GGGAACAATA Num.seqs=9

Similarity=0.837607

0

GGGAACAATAGAAAGTAGAATCGTGCCCGAAATCAGGAGAGAGCAGTGNCCCC

\*\*\*\*\*

Consensus:

GGGAACAATAGAAAGTAGAATCGTGCCCGAAATCAGGAGAGAGCAGTGNCCCC

>Bacillus\_Fam\_1191\_52\_1 Nr. of seq. 1 Alignment length(with gaps) = 52

Alignment score = 0.000000

GCF\_001420715.1\_ASM142071v1\_genomic.fna\_22:603974-604181 Satlength=208 Nr

of Repeats=4 RepeatLength=52 seed=ACAACGGTAA Num.seqs=3

Similarity=0.760684

0

ACAACGGTAACGATCAGAGGTGGAATGTGCCCGTAGCGGAGGAAATCTCGGG

\*\*\*\*\*

Consensus:

ACAACGGTAACGATCAGAGGTGGAATGTGCCCGTAGCGGAGGAAATCTCGGG

>Bacillus\_Fam\_1192\_52\_1 Nr. of seq. 1 Alignment length(with gaps) = 52  
Alignment score = 0.000000  
GCF\_001420715.1\_ASM142071v1\_genomic.fna\_22:614742-615418 Satlength=677 Nr  
of Repeats=13 RepeatLength=52 seed=TGTCCTTCAT Num.seqs=9  
Similarity=0.781971 0  
TGTCCTTCATGAAGGTAATGAAGTCCAACTAGGTGTACCAAAATCGAAAAG

\*\*\*\*\*  
Consensus:

TGTCCTTCATGAAGGTAATGAAGTCCAACTAGGTGTACCAAAATCGAAAAG

>Bacillus\_Fam\_1193\_52\_1 Nr. of seq. 1 Alignment length(with gaps) = 52  
Alignment score = 0.000000  
GCF\_001420715.1\_ASM142071v1\_genomic.fna\_22:972888-973200 Satlength=313 Nr  
of Repeats=6 RepeatLength=52 seed=AGCGATGAAG Num.seqs=6  
Similarity=0.835897 0  
AGCGATGAAGGCCAAAATGTGCTCGGTAACAAGAGCAGATGACCTTCATAAA

\*\*\*\*\*  
Consensus:

AGCGATGAAGGCCAAAATGTGCTCGGTAACAAGAGCAGATGACCTTCATAAA

>Bacillus\_Fam\_1194\_52\_1 Nr. of seq. 1 Alignment length(with gaps) = 52  
Alignment score = 0.000000  
GCF\_001420715.1\_ASM142071v1\_genomic.fna\_22:2501988-2502560 Satlength=573  
Nr of Repeats=11 RepeatLength=52 seed=ATCGTGCCCA Num.seqs=11  
Similarity=0.738721 0  
ATCGTGCCCAATACCGAGGCNGACATGGAATAACGGGAACAATACCAGGAGA

\*\*\*\*\*  
Consensus:

ATCGTGCCCAATACCGAGGCNGACATGGAATAACGGGAACAATACCAGGAGA

>Bacillus\_Fam\_1195\_52\_1 Nr. of seq. 1 Alignment length(with gaps) = 52  
Alignment score = 0.000000  
GCF\_001420715.1\_ASM142071v1\_genomic.fna\_22:3462522-3462781 Satlength=260  
Nr of Repeats=5 RepeatLength=52 seed=TGAAGGACAC Num.seqs=4  
Similarity=0.777778 23  
TATCTTGTCCTCATAACCCCGATGAAGGACACTTCCCTTGTTTTCTATCAC

\*\*\*\*\*  
Consensus:

TGAAGGACACTTCCCTTGTTTTCTATCACTATCTTGTCCTCATAACCCCGA

>Bacillus\_Fam\_1196\_52\_1 Nr. of seq. 1 Alignment length(with gaps) = 52  
Alignment score = 0.000000  
GCF\_001420715.1\_ASM142071v1\_genomic.fna\_24:148824-149188 Satlength=365 Nr  
of Repeats=7 RepeatLength=52 seed=CTTTGGTCTT Num.seqs=7  
Similarity=0.863133 0  
CTTTGGTCTTTATAACCCGCTTAAAGGACAATTCCTTTAAAATATTTGATTC

\*\*\*\*\*

Consensus:

CTTTGGTCTTTATAACCCGCTTAAAGGACAATTCCTTTAAAATATTTGATTC

>Bacillus\_Fam\_1197\_52\_1 Nr. of seq. 1 Alignment length(with gaps) = 52  
Alignment score = 0.000000  
GCF\_001420715.1\_ASM142071v1\_genomic.fna\_24:150600-151016 Satlength=417 Nr  
of Repeats=8 RepeatLength=52 seed=TGTCCTTCAT Num.seqs=8  
Similarity=0.746855 0  
TGTCCTTCATATGCTCCATGAAGGACATGTCCATGGGTATTTTCGGTTGTCT

\*\*\*\*\*

Consensus:

TGTCCTTCATATGCTCCATGAAGGACATGTCCATGGGTATTTTCGGTTGTCT

>Bacillus\_Fam\_1198\_52\_1 Nr. of seq. 1 Alignment length(with gaps) = 52  
Alignment score = 0.000000  
GCF\_001439915.1\_ASM143991v1\_genomic.fna\_83:3882-4089 Satlength=208 Nr of  
Repeats=4 RepeatLength=52 seed=ATTAGAGTAA Num.seqs=3 Similarity=0.811966  
0 ATTAGAGTAAAAGGTCTTCATCGATGTTATGAAGACCAAACCGGGTTCAGAG

\*\*\*\*\*

Consensus:

ATTAGAGTAAAAGGTCTTCATCGATGTTATGAAGACCAAACCGGGTTCAGAG

>Bacillus\_Fam\_1199\_52\_1 Nr. of seq. 1 Alignment length(with gaps) = 52  
Alignment score = 0.000000  
GCF\_001439915.1\_ASM143991v1\_genomic.fna\_83:129734-130312 Satlength=579 Nr  
of Repeats=11 RepeatLength=52 seed=TGATTGCGAC Num.seqs=7  
Similarity=0.740153 0  
TGATTGCGACACGGATTTTCGGNAAAATTCAAAGATGAGTCCGAATAAGAGTG

\*\*\*\*\*

Consensus:

TGATTGCGACACGGATTTTCGGNAAAATTCAAAGATGAGTCCGAATAAGAGTG

>Bacillus\_Fam\_1200\_52\_1 Nr. of seq. 1 Alignment length(with gaps) = 52  
Alignment score = 0.000000  
GCF\_001439915.1\_ASM143991v1\_genomic.fna\_83:602105-602677 Satlength=573 Nr  
of Repeats=11 RepeatLength=52 seed=CTTGTGTTGT Num.seqs=11  
Similarity=0.875058 0  
CTTGTGTTGTCCGAATCAAGGCGTCATTTCGGACAGCTACGCCAGATTTTCCTG

\*\*\*\*\*

Consensus:

CTTGTGTTGTCCGAATCAAGGCGTCATTTCGGACAGCTACGCCAGATTTTCCTG

>Bacillus\_Fam\_1201\_52\_1 Nr. of seq. 1 Alignment length(with gaps) = 52  
Alignment score = 0.000000  
GCF\_001439915.1\_ASM143991v1\_genomic.fna\_83:693863-694070 Satlength=208 Nr  
of Repeats=4 RepeatLength=52 seed=ATGATTCGGA Num.seqs=3  
Similarity=0.708595 0  
ATGATTCGGACACAGATCAGGAAAAACCGCACCCCTCGAGTCCGAATGAAGCG

\*\*\*\*\*  
Consensus:

ATGATTCGGACACAGATCAGGAAAAACCGCACCCCTCGAGTCCGAATGAAGCG

>Bacillus\_Fam\_1202\_52\_1 Nr. of seq. 1 Alignment length(with gaps) = 52  
Alignment score = 0.000000  
GCF\_001439915.1\_ASM143991v1\_genomic.fna\_84:126495-127119 Satlength=625 Nr  
of Repeats=12 RepeatLength=52 seed=AGTCCGAATG Num.seqs=12  
Similarity=0.750143 0  
AGTCCGAATGCAAGGCTGATTCGGACAGTTGGGTCAGGGGAATNCAGAAGCG

\*\*\*\*\*  
Consensus:

AGTCCGAATGCAAGGCTGATTCGGACAGTTGGGTCAGGGGAATNCAGAAGCG

>Bacillus\_Fam\_1203\_52\_1 Nr. of seq. 1 Alignment length(with gaps) = 52  
Alignment score = 0.000000  
GCF\_001439915.1\_ASM143991v1\_genomic.fna\_87:45812-46177 Satlength=366 Nr  
of Repeats=7 RepeatLength=52 seed=CTGTCAGAAT Num.seqs=6  
Similarity=0.776955  
0 CTGTCAGAATCAACCCTTCATTCGGACTCAACTACTCGTATTCCTTACTTCT

\*\*\*\*\*  
Consensus:

CTGTCAGAATCAACCCTTCATTCGGACTCAACTACTCGTATTCCTTACTTCT

>Bacillus\_Fam\_1204\_52\_1 Nr. of seq. 1 Alignment length(with gaps) = 52  
Alignment score = 0.000000  
GCF\_001439915.1\_ASM143991v1\_genomic.fna\_105:73746-74108 Satlength=363 Nr  
of Repeats=7 RepeatLength=52 seed=AGGTCTTCAT Num.seqs=6  
Similarity=0.714747  
0 AGGTCTTCATGAGGTTGATGAAGACCTATTTGCAACTAGTATTCTCTCGGAA

\*\*\*\*\*  
Consensus:

AGGTCTTCATGAGGTTGATGAAGACCTATTTGCAACTAGTATTCTCTCGGAA

>Bacillus\_Fam\_1205\_52\_1 Nr. of seq. 1 Alignment length(with gaps) = 52  
Alignment score = 0.000000  
GCF\_001439915.1\_ASM143991v1\_genomic.fna\_116:280129-280960 Satlength=832  
Nr of Repeats=16 RepeatLength=52 seed=GAATCGTACC Num.seqs=15  
Similarity=0.837118 0  
GAATCGTACCCGATTCGGGGCAATTGCAAGGAAAAGGGTAACGCAAACGTGG

\*\*\*\*\*

Consensus:

GAATCGTACCCGATTCGGGGCAATTGCAAGGAAAAGGGTAACGCAAACGTGG

>Bacillus\_Fam\_1206\_52\_1 Nr. of seq. 1 Alignment length(with gaps) = 52  
Alignment score = 0.000000

GCF\_001439915.1\_ASM143991v1\_genomic.fna\_122:196858-197329 Satlength=472

Nr of Repeats=9 RepeatLength=52 seed=CTGTCCGAAT Num.seqs=7

Similarity=0.686791

0

CTGTCCGAATGAGGCATGAATTCGGAATCATAAACGTTTTTTGGGACCTACA

\*\*\*\*\*

Consensus:

CTGTCCGAATGAGGCATGAATTCGGAATCATAAACGTTTTTTGGGACCTACA

>Bacillus\_Fam\_1207\_52\_1 Nr. of seq. 1 Alignment length(with gaps) = 52  
Alignment score = 0.000000

GCF\_001439915.1\_ASM143991v1\_genomic.fna\_122:208982-209396 Satlength=415

Nr of Repeats=8 RepeatLength=52 seed=TGGTCTTCAT Num.seqs=6

Similarity=0.796581

0

TGGTCTTCATCACCTCAATGATAACCGTTTCCGCGATTCAGCGAACGAGTTT

\*\*\*\*\*

Consensus:

TGGTCTTCATCACCTCAATGATAACCGTTTCCGCGATTCAGCGAACGAGTTT

>Bacillus\_Fam\_1208\_52\_1 Nr. of seq. 1 Alignment length(with gaps) = 52  
Alignment score = 0.000000

GCF\_001439915.1\_ASM143991v1\_genomic.fna\_122:222503-222814 Satlength=312

Nr of Repeats=6 RepeatLength=52 seed=TGTCCGAATC Num.seqs=5

Similarity=0.902564

0

TGTCCGAATCATAGGCTCATTCGGAATTAAGGCAACAGAATCCTTTGCGACG

\*\*\*\*\*

Consensus:

TGTCCGAATCATAGGCTCATTCGGAATTAAGGCAACAGAATCCTTTGCGACG

>Bacillus\_Fam\_1209\_52\_1 Nr. of seq. 1 Alignment length(with gaps) = 52  
Alignment score = 0.000000

GCF\_001439915.1\_ASM143991v1\_genomic.fna\_123:110275-110849 Satlength=575

Nr of Repeats=11 RepeatLength=52 seed=GAATCGTTCC Num.seqs=9

Similarity=0.688823

0

GAATCGTTCCCGATTGCAAATAAAAATCATAAAAAGAGTAACGCAAGCCCTC

\*\*\*\*\*

Consensus:

GAATCGTTCCCGATTGCAAATAAAAATCATAAAAAGAGTAACGCAAGCCCTC

>Bacillus\_Fam\_1210\_52\_1 Nr. of seq. 1 Alignment length(with gaps) = 52  
Alignment score = 0.000000  
GCF\_001439965.1\_ASM143996v1\_genomic.fna\_12:79325-79844 Satlength=520 Nr  
of Repeats=10 RepeatLength=52 seed=TTACCGGGGA Num.seqs=9  
Similarity=0.804131  
0 TTACCGGGGACTCTTGATTTCTCCTTCACGGTAAGCATACTCCCTCTTTGN

\*\*\*\*\*  
Consensus:

TTACCGGGGACTCTTGATTTCTCCTTCACGGTAAGCATACTCCCTCTTTGN

>Bacillus\_Fam\_1211\_52\_1 Nr. of seq. 1 Alignment length(with gaps) = 52  
Alignment score = 0.000000  
GCF\_001439965.1\_ASM143996v1\_genomic.fna\_121:100541-100822 Satlength=282  
Nr of Repeats=5 RepeatLength=52 seed=ACCGAAAGAG Num.seqs=4  
Similarity=0.805556  
ACCGAAAGAGGCCCAAGTCCCGCTCCAGGTAACCAAAACCCAGTAAAGGTA 0

\*\*\*\*\*  
Consensus:

ACCGAAAGAGGCCCAAGTCCCGCTCCAGGTAACCAAAACCCAGTAAAGGTA

>Bacillus\_Fam\_1212\_52\_1 Nr. of seq. 1 Alignment length(with gaps) = 52  
Alignment score = 0.000000  
GCF\_001587375.1\_ASM158737v1\_genomic.fna\_2:11105-11469 Satlength=365 Nr of  
Repeats=7 RepeatLength=52 seed=ATGGTACCGG Num.seqs=7 Similarity=0.814408  
0 ATGGTACCGGAAAAGAGAGAAGCTGTACGATGGCAACGCGAATCTCGTAGCC

\*\*\*\*\*  
Consensus:

ATGGTACCGGAAAAGAGAGAAGCTGTACGATGGCAACGCGAATCTCGTAGCC

>Bacillus\_Fam\_1213\_52\_1 Nr. of seq. 1 Alignment length(with gaps) = 52  
Alignment score = 0.000000  
GCF\_001587375.1\_ASM158737v1\_genomic.fna\_20:46870-47181 Satlength=312 Nr  
of Repeats=6 RepeatLength=52 seed=TGCTCTATCG Num.seqs=5  
Similarity=0.766038  
0 TGCTCTATCGGTTTCGCTTTTGNCTCTTGCAAGTACCATTGGCGTTNGTGCTCC

\*\*\*\*\*  
Consensus:

TGCTCTATCGGTTTCGCTTTTGNCTCTTGCAAGTACCATTGGCGTTNGTGCTCC

>Bacillus\_Fam\_1214\_52\_1 Nr. of seq. 1 Alignment length(with gaps) = 52  
Alignment score = 0.000000  
GCF\_001587375.1\_ASM158737v1\_genomic.fna\_20:50326-50534 Satlength=209 Nr  
of Repeats=4 RepeatLength=52 seed=GATCTTCCCG Num.seqs=4  
Similarity=0.846154  
0 GATCTTCCCGCATACCGGGATTCCGGTACTTCATGCAATGCTAGCTGCCGC

\*\*\*\*\*

Consensus:

GATCTTCCCGCATCACCGGGATTCTGGGTACTTCATGCAATGCTAGCTGCCGC

>Bacillus\_Fam\_1215\_52\_1 Nr. of seq. 1 Alignment length(with gaps) = 52  
Alignment score = 0.000000

GCF\_001587375.1\_ASM158737v1\_genomic.fna\_52:33919-34179 Satlength=261 Nr of Repeats=5 RepeatLength=52 seed=CAAAAATGTA Num.seqs=5  
Similarity=0.782051

0 CAAAAATGTAAAAGGAANGCCGGCTTGTATATAGATTTTCGGTGTAGAAGGT

\*\*\*\*\*

Consensus:

CAAAAATGTAAAAGGAANGCCGGCTTGTATATAGATTTTCGGTGTAGAAGGT

>Bacillus\_Fam\_1216\_52\_1 Nr. of seq. 1 Alignment length(with gaps) = 52  
Alignment score = 0.000000

GCF\_001587375.1\_ASM158737v1\_genomic.fna\_68:1509-1873 Satlength=365 Nr of Repeats=7 RepeatLength=52 seed=GCACAGCAAT Num.seqs=7 Similarity=0.821734

0 GCACAGCAATGGTACCGCTTCTCCTTTAACCGGTTCATAGCAGTACGCCCCG

\*\*\*\*\*

Consensus:

GCACAGCAATGGTACCGCTTCTCCTTTAACCGGTTCATAGCAGTACGCCCCG

>Bacillus\_Fam\_1217\_52\_1 Nr. of seq. 1 Alignment length(with gaps) = 52  
Alignment score = 0.000000

GCF\_001587375.1\_ASM158737v1\_genomic.fna\_89:4001-4209 Satlength=209 Nr of Repeats=4 RepeatLength=52 seed=CAAGTGGACG Num.seqs=4 Similarity=0.901709

0 CAAGTGGACGAATCCGCCGGATGCGGGAAGATAAGGATGGATGAACCCTGCT

\*\*\*\*\*

Consensus:

CAAGTGGACGAATCCGCCGGATGCGGGAAGATAAGGATGGATGAACCCTGCT

>Bacillus\_Fam\_1218\_52\_1 Nr. of seq. 1 Alignment length(with gaps) = 52  
Alignment score = 0.000000

GCF\_001587375.1\_ASM158737v1\_genomic.fna\_89:39868-40128 Satlength=261 Nr of Repeats=5 RepeatLength=52 seed=CCAACTTGGT Num.seqs=3  
Similarity=0.794872

0 CCAACTTGGTCGCCAAAGCCCCGGAATGAAGCCCAAGAACGAAGCAANNAGT

\*\*\*\*\*

Consensus:

CCAACTTGGTCGCCAAAGCCCCGGAATGAAGCCCAAGAACGAAGCAANNAGT

>Bacillus\_Fam\_1219\_52\_1 Nr. of seq. 1 Alignment length(with gaps) = 52  
Alignment score = 0.000000



GCF\_001587375.1\_ASM158737v1\_genomic.fna\_98:17349-17608 Satlength=260 Nr  
of Repeats=4 RepeatLength=52 seed=TGCCCGAAAAG Num.seqs=3  
Similarity=0.948718  
0 TGCCCGAAAAGAGCCGTATGCGGGAATTTGAACAAGACCCATCAATCCCGAAG

\*\*\*\*\*  
Consensus:

TGCCCGAAAAGAGCCGTATGCGGGAATTTGAACAAGACCCATCAATCCCGAAG

>Bacillus\_Fam\_1220\_52\_1 Nr. of seq. 1 Alignment length(with gaps) = 52  
Alignment score = 0.000000  
GCF\_001587375.1\_ASM158737v1\_genomic.fna\_154:82039-82563 Satlength=525 Nr  
of Repeats=10 RepeatLength=52 seed=CAAAATTAAA Num.seqs=9  
Similarity=0.890313 0  
CAAAATTAAAACAAGAAGTGCTTCATACAGCGTTTATGAGGTACATGGTTTT

\*\*\*\*\*  
Consensus:

CAAAATTAAAACAAGAAGTGCTTCATACAGCGTTTATGAGGTACATGGTTTT

>Bacillus\_Fam\_1221\_52\_1 Nr. of seq. 1 Alignment length(with gaps) = 52  
Alignment score = 0.000000  
GCF\_001587375.1\_ASM158737v1\_genomic.fna\_167:65422-65630 Satlength=209 Nr  
of Repeats=4 RepeatLength=52 seed=TACATTTTAC Num.seqs=4  
Similarity=0.803419  
0 TACATTTTACAAGCATCTATTCAAAAATGTAAAAGCAAAGCAAGGATACCTA

\*\*\*\*\*  
Consensus:

TACATTTTACAAGCATCTATTCAAAAATGTAAAAGCAAAGCAAGGATACCTA

>Bacillus\_Fam\_1222\_52\_1 Nr. of seq. 1 Alignment length(with gaps) = 52  
Alignment score = 0.000000  
GCF\_001587375.1\_ASM158737v1\_genomic.fna\_171:145480-145896 Satlength=417  
Nr of Repeats=8 RepeatLength=52 seed=GTCCGATGGA Num.seqs=8  
Similarity=0.862637 0  
GTCCGATGGAGAAGGAAAGCGTGAGGCTATGAGGCTGGAAAGAAGAGAAGCG

\*\*\*\*\*  
Consensus:

GTCCGATGGAGAAGGAAAGCGTGAGGCTATGAGGCTGGAAAGAAGAGAAGCG

>Bacillus\_Fam\_1223\_52\_1 Nr. of seq. 1 Alignment length(with gaps) = 52  
Alignment score = 0.000000  
GCF\_001590785.1\_ASM159078v1\_genomic.fna\_17:35789-35997 Satlength=209 Nr  
of Repeats=5 RepeatLength=52 seed=GCTCCCTTTT Num.seqs=3  
Similarity=0.693416  
0 GCTCCCTTTTGACCNCTTTTCGAGTTCAGCGCTNTTTTCNGGTGAATAGGTG

\*\*\*\*\*

Consensus:

GCTCCCTTTTGACCNCTTTTCGAGTTCAGCGCTNTTTTCNGGTGAATAGGTG

>Bacillus\_Fam\_1224\_52\_1 Nr. of seq. 1 Alignment length(with gaps) = 52  
Alignment score = 0.000000  
GCF\_001591445.1\_ASM159144v1\_genomic.fna\_10:32260-32468 Satlength=209 Nr of  
Repeats=4 RepeatLength=52 seed=TCTTTCTTAC Num.seqs=4  
Similarity=0.914530  
0 TCTTTCTTACCGTAACCACCTCTCAAACCTAGTCTTCGGTCGTTTAAGAGCCC

\*\*\*\*\*

Consensus:

TCTTTCTTACCGTAACCACCTCTCAAACCTAGTCTTCGGTCGTTTAAGAGCCC

>Bacillus\_Fam\_1225\_52\_1 Nr. of seq. 1 Alignment length(with gaps) = 52  
Alignment score = 0.000000  
GCF\_001591485.1\_ASM159148v1\_genomic.fna\_48:825-1138 Satlength=314 Nr of  
Repeats=6 RepeatLength=52 seed=TTCCAATCAA Num.seqs=5 Similarity=0.812820  
0 TTCCAATCAAGGGNATTGGTGCATGAACCCGAAAAAAACCGNGTAGTTCAAG

\*\*\*\*\*

Consensus:

TTCCAATCAAGGGNATTGGTGCATGAACCCGAAAAAAACCGNGTAGTTCAAG

>Bacillus\_Fam\_1226\_52\_1 Nr. of seq. 1 Alignment length(with gaps) = 52  
Alignment score = 0.000000  
GCF\_001591585.1\_ASM159158v1\_genomic.fna\_5:97301-97510 Satlength=210 Nr of  
Repeats=4 RepeatLength=52 seed=GCCACTTTTT Num.seqs=3 Similarity=0.982906  
0 GCCACTTTTTTCGCTTCTCCCTTCCATTTTGGCTTTCATCTTGGTAATGAAC

\*\*\*\*\*

Consensus:

GCCACTTTTTTCGCTTCTCCCTTCCATTTTGGCTTTCATCTTGGTAATGAAC

>Bacillus\_Fam\_1227\_52\_1 Nr. of seq. 1 Alignment length(with gaps) = 52  
Alignment score = 0.000000  
GCF\_001591585.1\_ASM159158v1\_genomic.fna\_8:46370-46578 Satlength=209 Nr of  
Repeats=4 RepeatLength=52 seed=ATAAGTGGTT Num.seqs=4 Similarity=0.893162  
0 ATAAGTGGTTTTTCATTCAACAAATGAACGCCACTTTTTATGGAAAAGATGGC

\*\*\*\*\*

Consensus:

ATAAGTGGTTTTTCATTCAACAAATGAACGCCACTTTTTATGGAAAAGATGGC

>Bacillus\_Fam\_1228\_52\_1 Nr. of seq. 1 Alignment length(with gaps) = 52  
Alignment score = 0.000000  
GCF\_001591585.1\_ASM159158v1\_genomic.fna\_13:90669-90981 Satlength=313 Nr of  
Repeats=6 RepeatLength=52 seed=GTTCATCAGT Num.seqs=6

Similarity=0.924786

0 GTTCATCAGTTGGATGAAAGCCGAAATCCCGTGGAGCAAGAGGAAAAGAGGC

\*\*\*\*\*

Consensus:

GTTCATCAGTTGGATGAAAGCCGAAATCCCGTGGAGCAAGAGGAAAAGAGGC

>Bacillus\_Fam\_1229\_52\_1 Nr. of seq. 1 Alignment length(with gaps) = 52

Alignment score = 0.000000

GCF\_001591645.1\_ASM159164v1\_genomic.fna\_1:671330-671590 Satlength=261 Nr

of Repeats=5 RepeatLength=52 seed=TTTAGTGCCC Num.seqs=5

Similarity=0.866667

0 TTTAGTGCCCGCGTATACCAGAAATTAGTAGAATGAGGTCACTAAAAGTTAA

\*\*\*\*\*

Consensus:

TTTAGTGCCCGCGTATACCAGAAATTAGTAGAATGAGGTCACTAAAAGTTAA

>Bacillus\_Fam\_1230\_52\_1 Nr. of seq. 1 Alignment length(with gaps) = 52

Alignment score = 0.000000

GCF\_001591645.1\_ASM159164v1\_genomic.fna\_1:803082-803290 Satlength=209 Nr

of Repeats=4 RepeatLength=52 seed=TCCAGATATT Num.seqs=4

Similarity=0.743590

0 TCCAGATATTAGGAAAACCAGGGCACTATATTCAGATTTAACACCCTTAAAA

\*\*\*\*\*

Consensus:

TCCAGATATTAGGAAAACCAGGGCACTATATTCAGATTTAACACCCTTAAAA

>Bacillus\_Fam\_1231\_52\_1 Nr. of seq. 1 Alignment length(with gaps) = 52

Alignment score = 0.000000

GCF\_001591645.1\_ASM159164v1\_genomic.fna\_1:810484-810796 Satlength=313 Nr

of Repeats=6 RepeatLength=52 seed=AGTCCGAATG Num.seqs=6

Similarity=0.801709

0 AGTCCGAATGACGGTCTGATTAGGACAGCAACAGCAGCTCAAACCTAATTCAC

\*\*\*\*\*

Consensus:

AGTCCGAATGACGGTCTGATTAGGACAGCAACAGCAGCTCAAACCTAATTCAC

>Bacillus\_Fam\_1232\_52\_1 Nr. of seq. 1 Alignment length(with gaps) = 52

Alignment score = 0.000000

GCF\_001591645.1\_ASM159164v1\_genomic.fna\_5:34073-34385 Satlength=313 Nr of

Repeats=6 RepeatLength=52 seed=GAAGTTCATC Num.seqs=6 Similarity=0.806838

0 GAAGTTCATCTGGCTCATGAACGTCATTACAAAGAGAAAAGACTGAGCAAAT

\*\*\*\*\*

Consensus:

GAAGTTCATCTGGCTCATGAACGTCATTACAAAGAGAAAAGACTGAGCAAAT

>Bacillus\_Fam\_1233\_52\_1 Nr. of seq. 1 Alignment length(with gaps) = 52  
Alignment score = 0.000000  
GCF\_001591645.1\_ASM159164v1\_genomic.fna\_18:93814-94126 Satlength=313 Nr  
of Repeats=6 RepeatLength=52 seed=TCTCTTACCA Num.seqs=6  
Similarity=0.747009  
0 TCTCTTACCATCCATCATGATTTTCCGCCCCGTTTGGGCACTGAGACGCCTTC

\*\*\*\*\*

Consensus:

TCTCTTACCATCCATCATGATTTTCCGCCCCGTTTGGGCACTGAGACGCCTTC

>Bacillus\_Fam\_1234\_52\_1 Nr. of seq. 1 Alignment length(with gaps) = 52  
Alignment score = 0.000000  
GCF\_001591665.1\_ASM159166v1\_genomic.fna\_28:471-678 Satlength=208 Nr of  
Repeats=4 RepeatLength=52 seed=ATCTTTCCCT Num.seqs=3 Similarity=0.897436  
0 ATCTTTCCCTTCCTTTTTTCAGCCAAACGTCGAAGTAGAACCACCTCTACTTCA

\*\*\*\*\*

Consensus:

ATCTTTCCCTTCCTTTTTTCAGCCAAACGTCGAAGTAGAACCACCTCTACTTCA

>Bacillus\_Fam\_1235\_52\_1 Nr. of seq. 1 Alignment length(with gaps) = 52  
Alignment score = 0.000000  
GCF\_001591665.1\_ASM159166v1\_genomic.fna\_41:6030-6288 Satlength=259 Nr of  
Repeats=5 RepeatLength=52 seed=GAAAGGGAGA Num.seqs=4 Similarity=0.893162  
0 GAAAGGGAGAAACGGTCGATAAGAGCGGTTTCATAACGACCATTGTTGGTTGAG

\*\*\*\*\*

Consensus:

GAAAGGGAGAAACGGTCGATAAGAGCGGTTTCATAACGACCATTGTTGGTTGAG

>Bacillus\_Fam\_1236\_52\_1 Nr. of seq. 1 Alignment length(with gaps) = 52  
Alignment score = 0.000000  
GCF\_001591665.1\_ASM159166v1\_genomic.fna\_57:81030-81238 Satlength=209 Nr  
of Repeats=4 RepeatLength=52 seed=CTCATGAGGA Num.seqs=4  
Similarity=0.820513  
0 CTCATGAGGACAGGAATCATGTTTAATTCACATTTTTTGTCTCATGAAAGG

\*\*\*\*\*

Consensus:

CTCATGAGGACAGGAATCATGTTTAATTCACATTTTTTGTCTCATGAAAGG

>Bacillus\_Fam\_1237\_52\_1 Nr. of seq. 1 Alignment length(with gaps) = 52  
Alignment score = 0.000000  
GCF\_001591665.1\_ASM159166v1\_genomic.fna\_60:22815-23075 Satlength=261 Nr  
of Repeats=5 RepeatLength=52 seed=ATCGACCGTA Num.seqs=5  
Similarity=0.912821  
0 ATCGACCGTAATTGACTTTCAGCTTGGCTATCGGGCTTTATAAACCTTTCTT

\*\*\*\*\*

Consensus:

ATCGACCGTAATTGACTTTCAGCTTGGCTATCGGGCTTTATAAACCTTTCTT

>Bacillus\_Fam\_1238\_52\_1 Nr. of seq. 1 Alignment length(with gaps) = 52

Alignment score = 0.000000

GCF\_001591665.1\_ASM159166v1\_genomic.fna\_94:124-764 Satlength=641 Nr of  
Repeats=7 RepeatLength=52 seed=ATGAAGGACT Num.seqs=5 Similarity=0.808805  
0 ATGAAGGACTAATCCCTATTAGAAAGACAGCGTTTTGTCCTTCATCAAGCAT

\*\*\*\*\*

Consensus:

ATGAAGGACTAATCCCTATTAGAAAGACAGCGTTTTGTCCTTCATCAAGCAT

>Bacillus\_Fam\_1239\_52\_1 Nr. of seq. 1 Alignment length(with gaps) = 52

Alignment score = 0.000000

GCF\_001591665.1\_ASM159166v1\_genomic.fna\_102:8439-8701 Satlength=263 Nr of  
Repeats=5 RepeatLength=52 seed=GGTTTCCAAT Num.seqs=3 Similarity=0.769231  
0 GGTTTCCAATCAGCCCTATTGGAACAAGTTAAGGCNAAAAAGTCGGTCAAAA

\*\*\*\*\*

Consensus:

GGTTTCCAATCAGCCCTATTGGAACAAGTTAAGGCNAAAAAGTCGGTCAAAA

>Bacillus\_Fam\_1240\_52\_1 Nr. of seq. 1 Alignment length(with gaps) = 52

Alignment score = 0.000000

GCF\_001591665.1\_ASM159166v1\_genomic.fna\_108:0-209 Satlength=210 Nr of  
Repeats=4 RepeatLength=52 seed=TTTTGTCCTC Num.seqs=3 Similarity=0.846154  
0 TTTTGTCTCATGAAGCACTCATGCGGACAGTTTCGCCTTGGGAACCCCGGG

\*\*\*\*\*

Consensus:

TTTTGTCTCATGAAGCACTCATGCGGACAGTTTCGCCTTGGGAACCCCGGG

>Bacillus\_Fam\_1241\_52\_1 Nr. of seq. 1 Alignment length(with gaps) = 52

Alignment score = 0.000000

GCF\_001591805.1\_ASM159180v1\_genomic.fna\_10:197189-197658 Satlength=470 Nr of  
Repeats=9 RepeatLength=52 seed=TCATAGTGCC Num.seqs=8  
Similarity=0.825092 0

TCATAGTGCCCGAAACCTGAAAAAACCAGCCACTCGGGCACTGAGAGCAGT

\*\*\*\*\*

Consensus:

TCATAGTGCCCGAAACCTGAAAAAACCAGCCACTCGGGCACTGAGAGCAGT

>Bacillus\_Fam\_1242\_52\_1 Nr. of seq. 1 Alignment length(with gaps) = 52

Alignment score = 0.000000

GCF\_001591805.1\_ASM159180v1\_genomic.fna\_28:10204-10514 Satlength=311 Nr of Repeats=6 RepeatLength=52 seed=CTATTGGACA Num.seqs=4 Similarity=0.858974  
0 CTATTGGACAGTTGGGGTTGTATCTTCGTCGATATTGTCCTATAGACCGCTT

\*\*\*\*\*  
Consensus:

CTATTGGACAGTTGGGGTTGTATCTTCGTCGATATTGTCCTATAGACCGCTT

>Bacillus\_Fam\_1243\_52\_1 Nr. of seq. 1 Alignment length(with gaps) = 52 Alignment score = 0.000000  
GCF\_001591805.1\_ASM159180v1\_genomic.fna\_38:47701-47961 Satlength=261 Nr of Repeats=5 RepeatLength=52 seed=GGATAACGGG Num.seqs=5 Similarity=0.861538  
0 GGATAACGGGCTCCAATGAGGGTTATTGGCGACCGAAACGCTCTCGAATTCC

\*\*\*\*\*  
Consensus:

GGATAACGGGCTCCAATGAGGGTTATTGGCGACCGAAACGCTCTCGAATTCC

>Bacillus\_Fam\_1244\_52\_1 Nr. of seq. 1 Alignment length(with gaps) = 52 Alignment score = 0.000000  
GCF\_001591805.1\_ASM159180v1\_genomic.fna\_49:18770-18980 Satlength=211 Nr of Repeats=4 RepeatLength=52 seed=GGTCACAGAG Num.seqs=3 Similarity=0.811966  
0 GGTCACAGAGAGCGATCCTCAGTGCCCGAAGAGAGGCAAAAAGCTGTCTAGC

\*\*\*\*\*  
Consensus:

GGTCACAGAGAGCGATCCTCAGTGCCCGAAGAGAGGCAAAAAGCTGTCTAGC

>Bacillus\_Fam\_1245\_52\_1 Nr. of seq. 1 Alignment length(with gaps) = 52 Alignment score = 0.000000  
GCF\_001591945.1\_ASM159194v1\_genomic.fna\_6:8074-8494 Satlength=421 Nr of Repeats=8 RepeatLength=52 seed=TGTCCCTTAG Num.seqs=7 Similarity=0.863248  
0 TGTCCCTTAGATCCTCTCTCTCGGACACTCCTTCTCCTTTTTCCTCAATATT

\*\*\*\*\*  
Consensus:

TGTCCCTTAGATCCTCTCTCTCGGACACTCCTTCTCCTTTTTCCTCAATATT

>Bacillus\_Fam\_1246\_52\_1 Nr. of seq. 1 Alignment length(with gaps) = 52 Alignment score = 0.000000  
GCF\_001591945.1\_ASM159194v1\_genomic.fna\_9:37775-37983 Satlength=209 Nr of Repeats=4 RepeatLength=52 seed=TGTCCCTTAG Num.seqs=4 Similarity=0.957265  
0 TGTCCCTTAGACGACTTCTCTCGGACACTTCCAACCCCTTCTCCGCGAGAC

\*\*\*\*\*  
Consensus:

TGTCCTTTAGACGACTTCTCTCGGACACTTCCAACCCCTTCTCCCGCGAGAC

>Bacillus\_Fam\_1247\_52\_1 Nr. of seq. 1 Alignment length(with gaps) = 52  
Alignment score = 0.000000  
GCF\_001591945.1\_ASM159194v1\_genomic.fna\_11:48233-48493 Satlength=261 Nr  
of Repeats=5 RepeatLength=52 seed=CTATTGGACA Num.seqs=5  
Similarity=0.730409  
0 CTATTGGACAGATCCTCTCCTCTTTTGGCTCGGACTGTCCTTTAGCGCCCTC

\*\*\*\*\*  
Consensus:

CTATTGGACAGATCCTCTCCTCTTTTGGCTCGGACTGTCCTTTAGCGCCCTC

>Bacillus\_Fam\_1248\_52\_1 Nr. of seq. 1 Alignment length(with gaps) = 52  
Alignment score = 0.000000  
GCF\_001636315.1\_ASM163631v1\_genomic.fna\_1:512977-513185 Satlength=209 Nr  
of Repeats=4 RepeatLength=52 seed=TATCGAAGAC Num.seqs=4  
Similarity=0.679487  
0 TATCGAAGACAAATTCCACCGCTTCCACCCTCGTTTTGTCCTCAAGACGCCT

\*\*\*\*\*  
Consensus:

TATCGAAGACAAATTCCACCGCTTCCACCCTCGTTTTGTCCTCAAGACGCCT

>Bacillus\_Fam\_1249\_52\_1 Nr. of seq. 1 Alignment length(with gaps) = 52  
Alignment score = 0.000000  
GCF\_001636315.1\_ASM163631v1\_genomic.fna\_1:972202-972514 Satlength=313 Nr  
of Repeats=6 RepeatLength=52 seed=GGGCACGTAG Num.seqs=6  
Similarity=0.717400  
0 GGGCACGTAGACGCNTTCTACGTTACCTTGAGGCGGGATATTTACGCTGGAT

\*\*\*\*\*  
Consensus:

GGGCACGTAGACGCNTTCTACGTTACCTTGAGGCGGGATATTTACGCTGGAT

>Bacillus\_Fam\_1250\_52\_1 Nr. of seq. 1 Alignment length(with gaps) = 52  
Alignment score = 0.000000  
GCF\_001636315.1\_ASM163631v1\_genomic.fna\_1:1021216-1021892 Satlength=677  
Nr of Repeats=13 RepeatLength=52 seed=GGGCACGTAG Num.seqs=13  
Similarity=0.788955 0  
GGGCACGTAGANCACGTCTACGTGACCGAACCGTCAGTTTTTCAGCTGNNTG

\*\*\*\*\*  
Consensus:

GGGCACGTAGANCACGTCTACGTGACCGAACCGTCAGTTTTTCAGCTGNNTG

>Bacillus\_Fam\_1251\_52\_1 Nr. of seq. 1 Alignment length(with gaps) = 52  
Alignment score = 0.000000

GCF\_001636315.1\_ASM163631v1\_genomic.fna\_1:1467817-1468025 Satlength=209  
Nr of Repeats=4 RepeatLength=52 seed=CGGGCACGTA Num.seqs=4  
Similarity=0.722222 86  
CTATGTGACCTTACACTGCTTTTTCATGCCC GTTCGGGCACGTAGAACACTT

\*\*\*\*\*  
Consensus:

CGGGCACGTAGAACACTTCTATGTGACCTTACACTGCTTTTTCATGCCC GTT

>Bacillus\_Fam\_1252\_52\_1 Nr. of seq. 1 Alignment length(with gaps) = 52  
Alignment score = 0.000000  
GCF\_001636315.1\_ASM163631v1\_genomic.fna\_1:1863825-1864292 Satlength=468  
Nr of Repeats=9 RepeatLength=52 seed=TATTGAAGAC Num.seqs=8  
Similarity=0.775641 0  
TATTGAAGACAAAATGAGATCACTCCCTTTTAAATTTGTCCCCAATACCCTC

\*\*\*\*\*  
Consensus:

TATTGAAGACAAAATGAGATCACTCCCTTTTAAATTTGTCCCCAATACCCTC

>Bacillus\_Fam\_1253\_52\_1 Nr. of seq. 1 Alignment length(with gaps) = 52  
Alignment score = 0.000000  
GCF\_001636315.1\_ASM163631v1\_genomic.fna\_1:1939675-1940039 Satlength=365  
Nr of Repeats=6 RepeatLength=52 seed=AAGTGTCTCC Num.seqs=5  
Similarity=0.843590 0  
AAGTGTCTCCAATAAGCTTCATTGGAGACAAAACCCNCTCTTTTTTCACGAG

\*\*\*\*\*  
Consensus:

AAGTGTCTCCAATAAGCTTCATTGGAGACAAAACCCNCTCTTTTTTCACGAG

>Bacillus\_Fam\_1254\_52\_1 Nr. of seq. 1 Alignment length(with gaps) = 52  
Alignment score = 0.000000  
GCF\_001636315.1\_ASM163631v1\_genomic.fna\_1:2327343-2327760 Satlength=418  
Nr of Repeats=8 RepeatLength=52 seed=AAAGTCACGT Num.seqs=7  
Similarity=0.738389 0  
AAAGTCACGTAGAAACCCTCTACGTGACCGTACCTCCCTTTTNCCTGCTCT

\*\*\*\*\*  
Consensus:

AAAGTCACGTAGAAACCCTCTACGTGACCGTACCTCCCTTTTNCCTGCTCT

>Bacillus\_Fam\_1255\_52\_1 Nr. of seq. 1 Alignment length(with gaps) = 52  
Alignment score = 0.000000  
GCF\_001636315.1\_ASM163631v1\_genomic.fna\_1:2431592-2432058 Satlength=467  
Nr of Repeats=9 RepeatLength=52 seed=CGGATTTTCC Num.seqs=6  
Similarity=0.835897 0  
CGGATTTTCCCTTTTTCAGACATCACTTAGACGGNCTCTACTTAGTGTCTAAAC

\*\*\*\*\*



Consensus:

CGGATTTTCCCTTTCAGACATCACTTAGACGGNCTCTACTTAGTGTCTAAAC

>Bacillus\_Fam\_1256\_52\_1 Nr. of seq. 1 Alignment length(with gaps) = 52  
Alignment score = 0.000000  
GCF\_001636315.1\_ASM163631v1\_genomic.fna\_1:2907285-2907649 Satlength=365  
Nr of Repeats=7 RepeatLength=52 seed=ATGAGAACTG Num.seqs=7  
Similarity=0.755316 0  
ATGAGAACTGAAACCANGAAAAGCGCGGCNGTCTTGTCTCATGAAGCGTTC

\*\*\*\*\*

Consensus:

ATGAGAACTGAAACCANGAAAAGCGCGGCNGTCTTGTCTCATGAAGCGTTC

>Bacillus\_Fam\_1257\_52\_1 Nr. of seq. 1 Alignment length(with gaps) = 52  
Alignment score = 0.000000  
GCF\_001636315.1\_ASM163631v1\_genomic.fna\_1:3080314-3080988 Satlength=675  
Nr of Repeats=13 RepeatLength=52 seed=GACCGAGCAG Num.seqs=11  
Similarity=0.820047 0  
GACCGAGCAGCTGGAAAAATAGGAAGAAGAGTCGCGTAGAGAGGTTCTANGC

\*\*\*\*\*

Consensus:

GACCGAGCAGCTGGAAAAATAGGAAGAAGAGTCGCGTAGAGAGGTTCTANGC

>Bacillus\_Fam\_1258\_52\_1 Nr. of seq. 1 Alignment length(with gaps) = 52  
Alignment score = 0.000000  
GCF\_001636315.1\_ASM163631v1\_genomic.fna\_1:3169529-3169945 Satlength=417  
Nr of Repeats=8 RepeatLength=52 seed=TAAGAAAGGC Num.seqs=8  
Similarity=0.836081 0  
TAAGAAAGGCTCTCAAGGACAAAACGCTAGTAAAAATTAATAGAANTGTCTT

\*\*\*\*\*

Consensus:

TAAGAAAGGCTCTCAAGGACAAAACGCTAGTAAAAATTAATAGAANTGTCTT

>Bacillus\_Fam\_1259\_52\_1 Nr. of seq. 1 Alignment length(with gaps) = 52  
Alignment score = 0.000000  
GCF\_001636315.1\_ASM163631v1\_genomic.fna\_1:3506345-3506708 Satlength=364  
Nr of Repeats=7 RepeatLength=52 seed=TCCATTGCCC Num.seqs=6  
Similarity=0.880342 0  
TCCATTGCCCCAAAACCGGCTAAATCATCAAATTATGGTCAATGCAGCCCCAT

\*\*\*\*\*

Consensus:

TCCATTGCCCCAAAACCGGCTAAATCATCAAATTATGGTCAATGCAGCCCCAT

>Bacillus\_Fam\_1260\_52\_1 Nr. of seq. 1 Alignment length(with gaps) = 52  
Alignment score = 0.000000

GCF\_001636315.1\_ASM163631v1\_genomic.fna\_1:3527584-3527946 Satlength=363  
Nr of Repeats=7 RepeatLength=52 seed=TGTCTGAATG Num.seqs=5  
Similarity=0.902564 0  
TGTCTGAATGATTATTTTGCAGCCAGAGATCAGTTAGAATCCGTCTAGTTGC

\*\*\*\*\*  
Consensus:

TGTCTGAATGATTATTTTGCAGCCAGAGATCAGTTAGAATCCGTCTAGTTGC

>Bacillus\_Fam\_1261\_52\_1 Nr. of seq. 1 Alignment length(with gaps) = 52  
Alignment score = 0.000000  
GCF\_001636315.1\_ASM163631v1\_genomic.fna\_1:3645171-3645639 Satlength=469  
Nr of Repeats=9 RepeatLength=52 seed=ATGAACCTTT Num.seqs=9  
Similarity=0.947293 0  
ATGAACCTTTCATAGAGCGCGTCGGAGTAAAAAATCGAGCTCCCGCGTACT

\*\*\*\*\*  
Consensus:

ATGAACCTTTCATAGAGCGCGTCGGAGTAAAAAATCGAGCTCCCGCGTACT

>Bacillus\_Fam\_1262\_52\_1 Nr. of seq. 1 Alignment length(with gaps) = 52  
Alignment score = 0.000000  
GCF\_001636315.1\_ASM163631v1\_genomic.fna\_1:3709317-3709941 Satlength=625  
Nr of Repeats=12 RepeatLength=52 seed=GTTTCATAGAG Num.seqs=12  
Similarity=0.770436 0  
GTTTCATAGAGCGCGAACNTGAGGGGAAATTCCAAAAACGCGCACTATAAAGA

\*\*\*\*\*  
Consensus:

GTTTCATAGAGCGCGAACNTGAGGGGAAATTCCAAAAACGCGCACTATAAAGA

>Bacillus\_Fam\_1263\_52\_1 Nr. of seq. 1 Alignment length(with gaps) = 52  
Alignment score = 0.000000  
GCF\_001636315.1\_ASM163631v1\_genomic.fna\_1:3807647-3808011 Satlength=365  
Nr of Repeats=7 RepeatLength=52 seed=TTTCGGAAAA Num.seqs=7  
Similarity=0.824176 0  
TTTCGGAAAAGGTGTTTCATAGAAGAGGTCAATGAGCACATGAGGCTGAGTTT

\*\*\*\*\*  
Consensus:

TTTCGGAAAAGGTGTTTCATAGAAGAGGTCAATGAGCACATGAGGCTGAGTTT

>Bacillus\_Fam\_1264\_52\_1 Nr. of seq. 1 Alignment length(with gaps) = 52  
Alignment score = 0.000000  
GCF\_001636315.1\_ASM163631v1\_genomic.fna\_1:3869085-3869761 Satlength=677  
Nr of Repeats=13 RepeatLength=52 seed=ACTATGGGAG Num.seqs=13  
Similarity=0.892176 0  
ACTATGGGAGGTTCATAGAGCGNGAAATTAGGAAAAAGGAAAGACTCCGCGC

\*\*\*\*\*

Consensus:

ACTATGGGAGGTTTCATAGAGCGNGAAATTAGGAAAAAGGAAAGACTCCGCGC

>Bacillus\_Fam\_1265\_52\_1 Nr. of seq. 1 Alignment length(with gaps) = 52  
Alignment score = 0.000000

GCF\_001636315.1\_ASM163631v1\_genomic.fna\_1:3880946-3881417 Satlength=472

Nr of Repeats=9 RepeatLength=52 seed=TATTGCCCCGA Num.seqs=6

Similarity=0.801709

0

TATTGCCCCGAAGAGAAGAAAAATAAATCCCGCGGTAAAAAGACCGGGCTTC

\*\*\*\*\*

Consensus:

TATTGCCCCGAAGAGAAGAAAAATAAATCCCGCGGTAAAAAGACCGGGCTTC

>Bacillus\_Fam\_1266\_52\_1 Nr. of seq. 1 Alignment length(with gaps) = 52  
Alignment score = 0.000000

GCF\_001636315.1\_ASM163631v1\_genomic.fna\_1:4057906-4058531 Satlength=626

Nr of Repeats=11 RepeatLength=52 seed=AGCGTTTATG Num.seqs=9

Similarity=0.918091

0

AGCGTTTATGAGAACAGAGAGCTAATGATTTGGGTCGGAAGTGTCTCATGA

\*\*\*\*\*

Consensus:

AGCGTTTATGAGAACAGAGAGCTAATGATTTGGGTCGGAAGTGTCTCATGA

>Bacillus\_Fam\_1267\_52\_1 Nr. of seq. 1 Alignment length(with gaps) = 52  
Alignment score = 0.000000

GCF\_001636315.1\_ASM163631v1\_genomic.fna\_1:4191741-4192522 Satlength=782

Nr of Repeats=15 RepeatLength=52 seed=AAAAAAGAGA Num.seqs=13

Similarity=0.833333

0

AAAAAAGAGAGCGCCGGGTAGAATANAGAGCATCTATGCGACCGAGCCCGAG

\*\*\*\*\*

Consensus:

AAAAAAGAGAGCGCCGGGTAGAATANAGAGCATCTATGCGACCGAGCCCGAG

>Bacillus\_Fam\_1268\_52\_1 Nr. of seq. 1 Alignment length(with gaps) = 52  
Alignment score = 0.000000

GCF\_001636315.1\_ASM163631v1\_genomic.fna\_1:4719016-4719328 Satlength=313

Nr of Repeats=6 RepeatLength=52 seed=TCAATGAACA Num.seqs=6

Similarity=0.734382

0

TCAATGAACACGAATCGGCAAAATTTTCAGGCAGGAAGTGTTTCATAGAGAGGT

\*\*\*\*\*

Consensus:

TCAATGAACACGAATCGGCAAAATTTTCAGGCAGGAAGTGTTTCATAGAGAGGT

>Bacillus\_Fam\_1269\_52\_1 Nr. of seq. 1 Alignment length(with gaps) = 52  
Alignment score = 0.000000

GCF\_001636315.1\_ASM163631v1\_genomic.fna\_1:5285435-5285695 Satlength=261  
Nr of Repeats=5 RepeatLength=52 seed=TCTACGTGCC Num.seqs=5  
Similarity=0.846154 0  
TCTACGTGCCCCAAGTTCAATAAATTAGTGGGTTTCGGTCGCGTAGAGCCCT

\*\*\*\*\*  
Consensus:

TCTACGTGCCCCAAGTTCAATAAATTAGTGGGTTTCGGTCGCGTAGAGCCCT

>Bacillus\_Fam\_1270\_52\_1 Nr. of seq. 1 Alignment length(with gaps) = 52  
Alignment score = 0.000000  
GCF\_001636315.1\_ASM163631v1\_genomic.fna\_1:5395730-5396199 Satlength=470  
Nr of Repeats=9 RepeatLength=52 seed=TTGACCTTTT Num.seqs=8  
Similarity=0.780997 0  
TTGACCTTTTCTTTNAAAATCAATTAGTTTTAGGCAATGNACATGGCTTCCA

\*\*\*\*\*  
Consensus:

TTGACCTTTTCTTTNAAAATCAATTAGTTTTAGGCAATGNACATGGCTTCCA

>Bacillus\_Fam\_1271\_52\_1 Nr. of seq. 1 Alignment length(with gaps) = 52  
Alignment score = 0.000000  
GCF\_001636325.1\_ASM163632v1\_genomic.fna\_1:270063-270479 Satlength=417 Nr  
of Repeats=8 RepeatLength=52 seed=CATCCTCTTC Num.seqs=8  
Similarity=0.888278  
0 CATCCTCTTCAGGTGAAAAAGCCCAATTATTCACCGGAGTGCTCATATTTT

\*\*\*\*\*  
Consensus:

CATCCTCTTCAGGTGAAAAAGCCCAATTATTCACCGGAGTGCTCATATTTT

>Bacillus\_Fam\_1272\_52\_1 Nr. of seq. 1 Alignment length(with gaps) = 52  
Alignment score = 0.000000  
GCF\_001636325.1\_ASM163632v1\_genomic.fna\_1:669107-669471 Satlength=365 Nr  
of Repeats=7 RepeatLength=52 seed=TTATTCCTCT Num.seqs=7  
Similarity=0.777778  
0 TTATTCCTCTAAAGCAACGCCACACGCGCTCTTCAGGTGAACAAATCGCAT

\*\*\*\*\*  
Consensus:

TTATTCCTCTAAAGCAACGCCACACGCGCTCTTCAGGTGAACAAATCGCAT

>Bacillus\_Fam\_1273\_52\_1 Nr. of seq. 1 Alignment length(with gaps) = 52  
Alignment score = 0.000000  
GCF\_001636325.1\_ASM163632v1\_genomic.fna\_1:2472643-2473059 Satlength=417  
Nr of Repeats=8 RepeatLength=52 seed=GTATTTACA Num.seqs=8  
Similarity=0.934066 0  
GTATTTTACACGAAGGGATTTTGAACCGAATGCTTCAGGTGAATAAATTGCG

\*\*\*\*\*

Consensus:

GTTATTTACACGAAGGGATTTTGAACCGAATGCTTCAGGTGAATAAATTGCG

>Bacillus\_Fam\_1274\_52\_1 Nr. of seq. 1 Alignment length(with gaps) = 52  
Alignment score = 0.000000  
GCF\_001636325.1\_ASM163632v1\_genomic.fna\_3:175232-175492 Satlength=261 Nr  
of Repeats=5 RepeatLength=52 seed=ATTTATTCCC Num.seqs=5  
Similarity=0.893082  
8 TAAACTGAATTTATTCCCATGAAGCGAGAGGAAAACCGGAGCTTCCGGTGGGA

\*\*\*\*\*

Consensus:

ATTTATTCCCATGAAGCGAGAGGAAAACCGGAGCTTCCGGTGGATAAACTGA

>Bacillus\_Fam\_1275\_52\_1 Nr. of seq. 1 Alignment length(with gaps) = 52  
Alignment score = 0.000000  
GCF\_001636325.1\_ASM163632v1\_genomic.fna\_3:896857-897117 Satlength=261 Nr  
of Repeats=5 RepeatLength=52 seed=AAAATGGTCA Num.seqs=5  
Similarity=0.910256  
0 AAAATGGTCACAGAGTGCCAACTAAGACCAAAATGACAAGGGAGCAAGCGG

\*\*\*\*\*

Consensus:

AAAATGGTCACAGAGTGCCAACTAAGACCAAAATGACAAGGGAGCAAGCGG

>Bacillus\_Fam\_1276\_52\_1 Nr. of seq. 1 Alignment length(with gaps) = 52  
Alignment score = 0.000000  
GCF\_001636325.1\_ASM163632v1\_genomic.fna\_3:1103562-1104238 Satlength=677  
Nr of Repeats=13 RepeatLength=52 seed=GGAAGGTAGG Num.seqs=13  
Similarity=0.902696 0  
GGAAGGTAGGAGAGAGGCAGTCTCATCGCCCGTTCCCAGCTATTTACCATTA

\*\*\*\*\*

Consensus:

GGAAGGTAGGAGAGAGGCAGTCTCATCGCCCGTTCCCAGCTATTTACCATTA

>Bacillus\_Fam\_1277\_52\_1 Nr. of seq. 1 Alignment length(with gaps) = 52  
Alignment score = 0.000000  
GCF\_001636335.1\_ASM163633v1\_genomic.fna\_1:243388-244011 Satlength=624 Nr  
of Repeats=12 RepeatLength=52 seed=CATAGAGCGA Num.seqs=11  
Similarity=0.809324 0  
CATAGAGCGAGTCAATGGGACATTTNGCAATTTTCNAGAGCAGCAAATGTCC

\*\*\*\*\*

Consensus:

CATAGAGCGAGTCAATGGGACATTTNGCAATTTTCNAGAGCAGCAAATGTCC

>Bacillus\_Fam\_1278\_52\_1 Nr. of seq. 1 Alignment length(with gaps) = 52  
Alignment score = 0.000000

GCF\_001636335.1\_ASM163633v1\_genomic.fna\_1:698208-698468 Satlength=261 Nr  
of Repeats=5 RepeatLength=52 seed=TGATGGACAA Num.seqs=5  
Similarity=0.833962  
0 TGATGGACAAAACAGTAGATAGAGCGCAAAGCAAAGTCCATCAATCCTGAGA

\*\*\*\*\*  
Consensus:

TGATGGACAAAACAGTAGATAGAGCGCAAAGCAAAGTCCATCAATCCTGAGA

>Bacillus\_Fam\_1279\_52\_1 Nr. of seq. 1 Alignment length(with gaps) = 52  
Alignment score = 0.000000  
GCF\_001636335.1\_ASM163633v1\_genomic.fna\_1:1609919-1610545 Satlength=627  
Nr of Repeats=12 RepeatLength=52 seed=TTCTTCGTT Num.seqs=9  
Similarity=0.924501 0  
TTCTTCGTTTCTTCATGGGTTTTGTACCATTGATTGCTTCTATGGGACATG

\*\*\*\*\*  
Consensus:

TTCTTCGTTTCTTCATGGGTTTTGTACCATTGATTGCTTCTATGGGACATG

>Bacillus\_Fam\_1280\_52\_1 Nr. of seq. 1 Alignment length(with gaps) = 52  
Alignment score = 0.000000  
GCF\_001636335.1\_ASM163633v1\_genomic.fna\_1:2312900-2313420 Satlength=521  
Nr of Repeats=10 RepeatLength=52 seed=GATTTTTCCT Num.seqs=10  
Similarity=0.885470 0  
GATTTTTCCTAAAGTACCTTGTTGCGGGCGACATGAGCGCTTCTTGGCTACC

\*\*\*\*\*  
Consensus:

GATTTTTCCTAAAGTACCTTGTTGCGGGCGACATGAGCGCTTCTTGGCTACC

>Bacillus\_Fam\_1281\_52\_1 Nr. of seq. 1 Alignment length(with gaps) = 52  
Alignment score = 0.000000  
GCF\_001636335.1\_ASM163633v1\_genomic.fna\_1:2486081-2486704 Satlength=624  
Nr of Repeats=10 RepeatLength=52 seed=GACTTTTTCG Num.seqs=8  
Similarity=0.874542 0  
GACTTTTTCGGGAGACATGAGCTAGTCTTGGCGACCGGTTTCACAAGTTGAT

\*\*\*\*\*  
Consensus:

GACTTTTTCGGGAGACATGAGCTAGTCTTGGCGACCGGTTTCACAAGTTGAT

>Bacillus\_Fam\_1282\_52\_1 Nr. of seq. 1 Alignment length(with gaps) = 52  
Alignment score = 0.000000  
GCF\_001636335.1\_ASM163633v1\_genomic.fna\_1:2726431-2726899 Satlength=469  
Nr of Repeats=9 RepeatLength=52 seed=TTCTATGAGA Num.seqs=9  
Similarity=0.837607 0  
TTCTATGAGACAAAATCGGGGAGCAGACGAGGNGTTTGTCTCATTGGAGCG

\*\*\*\*\*

Consensus:

TTCTATGAGACAAAAATCGGGGAGCAGACGAGGNGTTTGTCTCATTGGAGCG

>Bacillus\_Fam\_1283\_52\_1 Nr. of seq. 1 Alignment length(with gaps) = 52  
Alignment score = 0.000000  
GCF\_001636335.1\_ASM163633v1\_genomic.fna\_1:2864058-2864994 Satlength=937  
Nr of Repeats=16 RepeatLength=52 seed=GACTCTTTGA Num.seqs=14  
Similarity=0.827557 0  
GACTCTTTGAGCNGATTTTTTCGGGCGTTGGGTCCTCTATCNGGCTTATTGAN

\*\*\*\*\*

Consensus:

GACTCTTTGAGCNGATTTTTTCGGGCGTTGGGTCCTCTATCNGGCTTATTGAN

>Bacillus\_Fam\_1284\_52\_1 Nr. of seq. 1 Alignment length(with gaps) = 52  
Alignment score = 0.000000  
GCF\_001636335.1\_ASM163633v1\_genomic.fna\_1:2901338-2902222 Satlength=885  
Nr of Repeats=17 RepeatLength=52 seed=TTTGTCTTC Num.seqs=17  
Similarity=0.832579 0  
TTTGTCTTCATTCGCTTGATGATGGACTTTTTCTAGAGCGATCGGCTTCGN

\*\*\*\*\*

Consensus:

TTTGTCTTCATTCGCTTGATGATGGACTTTTTCTAGAGCGATCGGCTTCGN

>Bacillus\_Fam\_1285\_52\_1 Nr. of seq. 1 Alignment length(with gaps) = 52  
Alignment score = 0.000000  
GCF\_001636335.1\_ASM163633v1\_genomic.fna\_1:2936390-2936910 Satlength=521  
Nr of Repeats=10 RepeatLength=52 seed=ATGATGGACA Num.seqs=10  
Similarity=0.884331 0  
ATGATGGACATTTTCGATAATTTCTCAGCTGCTTTTGGCCTTCATCTCTTCG

\*\*\*\*\*

Consensus:

ATGATGGACATTTTCGATAATTTCTCAGCTGCTTTTGGCCTTCATCTCTTCG

>Bacillus\_Fam\_1286\_52\_1 Nr. of seq. 1 Alignment length(with gaps) = 52  
Alignment score = 0.000000  
GCF\_001636335.1\_ASM163633v1\_genomic.fna\_1:3065276-3065640 Satlength=365  
Nr of Repeats=7 RepeatLength=52 seed=ATGATGGACA Num.seqs=7  
Similarity=0.823600 0  
ATGATGGACACTTGGAGCGGATTCTTTTCGCTTTTGTCCATCATCTCTCGC

\*\*\*\*\*

Consensus:

ATGATGGACACTTGGAGCGGATTCTTTTCGCTTTTGTCCATCATCTCTCGC

>Bacillus\_Fam\_1287\_52\_1 Nr. of seq. 1 Alignment length(with gaps) = 52  
Alignment score = 0.000000

GCF\_001636335.1\_ASM163633v1\_genomic.fna\_1:3328615-3328927 Satlength=313  
Nr of Repeats=6 RepeatLength=52 seed=TTTTGTCCCA Num.seqs=6  
Similarity=0.887179 0  
TTTTGTCCCATAGAACCCCTCTATGGGACATTTCTCTTGCCTATTCTGATC

\*\*\*\*\*  
Consensus:

TTTTGTCCCATAGAACCCCTCTATGGGACATTTCTCTTGCCTATTCTGATC

>Bacillus\_Fam\_1288\_52\_1 Nr. of seq. 1 Alignment length(with gaps) = 52  
Alignment score = 0.000000  
GCF\_001636345.1\_ASM163634v1\_genomic.fna\_1:2372700-2373012 Satlength=313  
Nr of Repeats=6 RepeatLength=52 seed=AGGATTTCAG Num.seqs=6  
Similarity=0.871795 0  
AGGATTTCAGGAATCAGAACATCAATGTAAATCCCGAAACCAGTTCCATGCA

\*\*\*\*\*  
Consensus:

AGGATTTCAGGAATCAGAACATCAATGTAAATCCCGAAACCAGTTCCATGCA

>Bacillus\_Fam\_1289\_52\_1 Nr. of seq. 1 Alignment length(with gaps) = 52  
Alignment score = 0.000000  
GCF\_001636345.1\_ASM163634v1\_genomic.fna\_1:2479013-2479325 Satlength=313  
Nr of Repeats=6 RepeatLength=52 seed=ATTTGGATAT Num.seqs=6  
Similarity=0.830769 0  
ATTTGGATATTAAGGTCGTGATAAGCGCCTAAACACCCCTCTGTTATACAGT

\*\*\*\*\*  
Consensus:

ATTTGGATATTAAGGTCGTGATAAGCGCCTAAACACCCCTCTGTTATACAGT

>Bacillus\_Fam\_1290\_52\_1 Nr. of seq. 1 Alignment length(with gaps) = 52  
Alignment score = 0.000000  
GCF\_001636345.1\_ASM163634v1\_genomic.fna\_1:2544842-2545362 Satlength=521  
Nr of Repeats=10 RepeatLength=52 seed=TCTCCTTCCC Num.seqs=10  
Similarity=0.807827 0  
TCTCCTTCCCCAACTCTATTGATGACCGGCATTTTCGGGAAGTACTCTGCCTN

\*\*\*\*\*  
Consensus:

TCTCCTTCCCCAACTCTATTGATGACCGGCATTTTCGGGAAGTACTCTGCCTN

>Bacillus\_Fam\_1291\_52\_1 Nr. of seq. 1 Alignment length(with gaps) = 52  
Alignment score = 0.000000  
GCF\_001636345.1\_ASM163634v1\_genomic.fna\_1:2589875-2590238 Satlength=364  
Nr of Repeats=7 RepeatLength=52 seed=ATTCCCGAAT Num.seqs=6  
Similarity=0.808547 0  
ATTCCCGAATTCCACTTAATGCACTTGTTTCGGGAATTACTACGGGCTTCTC

\*\*\*\*\*



Consensus:

ATTCCCGAATTCCACTTAATGCACTTGTTTCGGGAATTACTACGGGCTTCTC

>Bacillus\_Fam\_1292\_52\_1 Nr. of seq. 1 Alignment length(with gaps) = 52  
Alignment score = 0.000000  
GCF\_001636345.1\_ASM163634v1\_genomic.fna\_1:2600820-2601080 Satlength=261  
Nr of Repeats=5 RepeatLength=52 seed=ACGGGCACTT Num.seqs=5  
Similarity=0.628205 0  
ACGGGCACTTTGANCGCACNTTTGTTCCCNCCAACACGCTTTTTTCCAAGCCG

\*\*\*\*\*

Consensus:

ACGGGCACTTTGANCGCACNTTTGTTCCCNCCAACACGCTTTTTTCCAAGCCG

>Bacillus\_Fam\_1293\_52\_1 Nr. of seq. 1 Alignment length(with gaps) = 52  
Alignment score = 0.000000  
GCF\_001636345.1\_ASM163634v1\_genomic.fna\_1:2885450-2885866 Satlength=417  
Nr of Repeats=8 RepeatLength=52 seed=GAATTAGAAT Num.seqs=8  
Similarity=0.846154 0  
GAATTAGAATCCAAGAGTCATTCTGAAACGGTCTCAACCATGGAAGTTCGG

\*\*\*\*\*

Consensus:

GAATTAGAATCCAAGAGTCATTCTGAAACGGTCTCAACCATGGAAGTTCGG

>Bacillus\_Fam\_1294\_52\_1 Nr. of seq. 1 Alignment length(with gaps) = 52  
Alignment score = 0.000000  
GCF\_001636345.1\_ASM163634v1\_genomic.fna\_1:3320349-3320660 Satlength=312  
Nr of Repeats=6 RepeatLength=52 seed=AACGCTTAAT Num.seqs=5  
Similarity=0.864103 0  
AACGCTTAATCACGACAGTATTATCCAGATAACGGTAATTAGGGGCGTGATA

\*\*\*\*\*

Consensus:

AACGCTTAATCACGACAGTATTATCCAGATAACGGTAATTAGGGGCGTGATA

>Bacillus\_Fam\_1295\_52\_1 Nr. of seq. 1 Alignment length(with gaps) = 52  
Alignment score = 0.000000  
GCF\_001636345.1\_ASM163634v1\_genomic.fna\_1:3986989-3987509 Satlength=521  
Nr of Repeats=10 RepeatLength=52 seed=AGCGGATTTTC Num.seqs=10  
Similarity=0.888889 0  
AGCGGATTTTCGGGAATTACTTTCCCTTTGCATTTCCCGAAACTTTGTCTCCT

\*\*\*\*\*

Consensus:

AGCGGATTTTCGGGAATTACTTTCCCTTTGCATTTCCCGAAACTTTGTCTCCT

>Bacillus\_Fam\_1296\_52\_1 Nr. of seq. 1 Alignment length(with gaps) = 52  
Alignment score = 0.000000

GCF\_001636345.1\_ASM163634v1\_genomic.fna\_1:4285214-4285526 Satlength=313  
Nr of Repeats=6 RepeatLength=52 seed=TTACGCCTTA Num.seqs=6  
Similarity=0.856410 0  
TTACGCCTTAAACACGACTCCAATTCCCAGGTTTTGGTGTTCGTGTCTCGA

\*\*\*\*\*  
Consensus:

TTACGCCTTAAACACGACTCCAATTCCCAGGTTTTGGTGTTCGTGTCTCGA

>Bacillus\_Fam\_1297\_52\_1 Nr. of seq. 1 Alignment length(with gaps) = 52  
Alignment score = 0.000000  
GCF\_001636345.1\_ASM163634v1\_genomic.fna\_1:4405935-4406559 Satlength=625  
Nr of Repeats=12 RepeatLength=52 seed=GTTCTATTTTC Num.seqs=12  
Similarity=0.870241 0  
GTTCTATTTCCCCAAACCGGCACTCGCCTTCTCTTTTCGGAATTACTTTGCC

\*\*\*\*\*  
Consensus:

GTTCTATTTCCCCAAACCGGCACTCGCCTTCTCTTTTCGGAATTACTTTGCC

>Bacillus\_Fam\_1298\_52\_1 Nr. of seq. 1 Alignment length(with gaps) = 52  
Alignment score = 0.000000  
GCF\_001636425.1\_ASM163642v1\_genomic.fna\_1:1121864-1122176 Satlength=313  
Nr of Repeats=6 RepeatLength=52 seed=TTTTGTCCTT Num.seqs=6  
Similarity=0.811966 0  
TTTTGTCCTTCATACCACCGATGAAGGACTTTTGACAACGAAAATTCACCAG

\*\*\*\*\*  
Consensus:

TTTTGTCCTTCATACCACCGATGAAGGACTTTTGACAACGAAAATTCACCAG

>Bacillus\_Fam\_1299\_52\_1 Nr. of seq. 1 Alignment length(with gaps) = 52  
Alignment score = 0.000000  
GCF\_001636425.1\_ASM163642v1\_genomic.fna\_1:2575815-2576335 Satlength=521  
Nr of Repeats=10 RepeatLength=52 seed=TGAAGGACTT Num.seqs=10  
Similarity=0.852991 0  
TGAAGGACTTTTATCACCTTTTATTCTCGCGAAAAGTCCTTCATACCTGCGA

\*\*\*\*\*  
Consensus:

TGAAGGACTTTTATCACCTTTTATTCTCGCGAAAAGTCCTTCATACCTGCGA

>Bacillus\_Fam\_1300\_52\_1 Nr. of seq. 1 Alignment length(with gaps) = 52  
Alignment score = 0.000000  
GCF\_001636425.1\_ASM163642v1\_genomic.fna\_1:4150616-4151084 Satlength=469  
Nr of Repeats=9 RepeatLength=52 seed=GATGAAGGAC Num.seqs=9  
Similarity=0.829060 0  
GATGAAGGACTATTCTTGCTTTGATTGTGCTCGAATGGTCCATCATCCCCTC

\*\*\*\*\*

Consensus:

GATGAAGGACTATTCTTGCTTTGATTGTGCTCGAATGGTCCATCATCCCCTC

>Bacillus\_Fam\_1301\_52\_1 Nr. of seq. 1 Alignment length(with gaps) = 52  
Alignment score = 0.000000

GCF\_001636425.1\_ASM163642v1\_genomic.fna\_1:4305654-4306121 Satlength=468

Nr of Repeats=9 RepeatLength=52 seed=AAGTCCTTCA Num.seqs=8

Similarity=0.836081

0

AAGTCCTTCATCGTGGTTATGAAGACCAATAAGAGGTTAATTAGGAAGCGAA

\*\*\*\*\*

Consensus:

AAGTCCTTCATCGTGGTTATGAAGACCAATAAGAGGTTAATTAGGAAGCGAA

>Bacillus\_Fam\_1302\_52\_1 Nr. of seq. 1 Alignment length(with gaps) = 52  
Alignment score = 0.000000

GCF\_001645705.1\_ASM164570v1\_genomic.fna\_54:62195-62753 Satlength=559 Nr

of Repeats=10 RepeatLength=52 seed=CGGTTCGCATA Num.seqs=8

Similarity=0.845013

0 CGGTTCGCATAGCAAGGTTCTATAAGCCCGGAAACACAGGAAATCCAATGGAA

\*\*\*\*\*

Consensus:

CGGTTCGCATAGCAAGGTTCTATAAGCCCGGAAACACAGGAAATCCAATGGAA

>Bacillus\_Fam\_1303\_52\_1 Nr. of seq. 1 Alignment length(with gaps) = 52  
Alignment score = 0.000000

GCF\_001645705.1\_ASM164570v1\_genomic.fna\_60:318578-318994 Satlength=417 Nr

of Repeats=8 RepeatLength=52 seed=AGTGAACCGG Num.seqs=8

Similarity=0.891941

0

AGTGAACCGGCGGAAACAGAGTTCAAAGAAGGGCCTATGTTCCCGAAATCG

\*\*\*\*\*

Consensus:

AGTGAACCGGCGGAAACAGAGTTCAAAGAAGGGCCTATGTTCCCGAAATCG

>Bacillus\_Fam\_1304\_52\_1 Nr. of seq. 1 Alignment length(with gaps) = 52  
Alignment score = 0.000000

GCF\_001648575.1\_ASM164857v1\_genomic.fna\_4:219533-220209 Satlength=677 Nr

of Repeats=13 RepeatLength=52 seed=GCGTGTTCATA Num.seqs=11

Similarity=0.763636

0

GCGTGTTCATAGAGCCCGAATGAAACGCGAANTCGCTGGGGCTTAGTGAAAAC

\*\*\*\*\*

Consensus:

GCGTGTTCATAGAGCCCGAATGAAACGCGAANTCGCTGGGGCTTAGTGAAAAC

>Bacillus\_Fam\_1305\_52\_1 Nr. of seq. 1 Alignment length(with gaps) = 52  
Alignment score = 0.000000

GCF\_001648575.1\_ASM164857v1\_genomic.fna\_14:26277-26899 Satlength=623 Nr  
of Repeats=12 RepeatLength=52 seed=TGGAATTGTC Num.seqs=10  
Similarity=0.947578  
TGGAATTGTCATCATAGCAATCATGAAGACAATCTCGAGCGGATTTTGTGAG

0

\*\*\*\*\*  
Consensus:

TGGAATTGTCATCATAGCAATCATGAAGACAATCTCGAGCGGATTTTGTGAG

>Bacillus\_Fam\_1306\_52\_1 Nr. of seq. 1 Alignment length(with gaps) = 52  
Alignment score = 0.000000  
GCF\_001648575.1\_ASM164857v1\_genomic.fna\_47:0-207 Satlength=208 Nr of  
Repeats=4 RepeatLength=52 seed=CCTTATGAAG Num.seqs=4 Similarity=0.918803  
0 CCTTATGAAGACACTTTCGGTCCACTTTCTCTCTCGGATGTGTCTTCATCCA

\*\*\*\*\*  
Consensus:

CCTTATGAAGACACTTTCGGTCCACTTTCTCTCTCGGATGTGTCTTCATCCA

>Bacillus\_Fam\_1307\_52\_1 Nr. of seq. 1 Alignment length(with gaps) = 52  
Alignment score = 0.000000  
GCF\_001648575.1\_ASM164857v1\_genomic.fna\_52:38204-38672 Satlength=469 Nr  
of Repeats=9 RepeatLength=52 seed=CGTTTTCCTT Num.seqs=9  
Similarity=0.849003  
0 CGTTTTCCTTGCTCGCTTCGAAGTTTGCGTGCCATTGCGCCTCTATGACACG

\*\*\*\*\*  
Consensus:

CGTTTTCCTTGCTCGCTTCGAAGTTTGCGTGCCATTGCGCCTCTATGACACG

>Bacillus\_Fam\_1308\_52\_1 Nr. of seq. 1 Alignment length(with gaps) = 52  
Alignment score = 0.000000  
GCF\_001648575.1\_ASM164857v1\_genomic.fna\_59:39775-40244 Satlength=470 Nr  
of Repeats=9 RepeatLength=52 seed=CGCGAATTTTC Num.seqs=8  
Similarity=0.870879  
0 CGCGAATTTCCCTCCCGCTCCTAATTTGGTGTGTCATACTGCTCCTATGACG

\*\*\*\*\*  
Consensus:

CGCGAATTTCCCTCCCGCTCCTAATTTGGTGTGTCATACTGCTCCTATGACG

>Bacillus\_Fam\_1309\_52\_1 Nr. of seq. 1 Alignment length(with gaps) = 52  
Alignment score = 0.000000  
GCF\_001648575.1\_ASM164857v1\_genomic.fna\_60:94014-94277 Satlength=264 Nr  
of Repeats=5 RepeatLength=52 seed=TTTCCCTCTC Num.seqs=4  
Similarity=0.935897  
0 TTTCCCTCTCAACATTGTCTTCATCCACCTTGTGAAGACAGTACCATGCTTG

\*\*\*\*\*  
Consensus:

TTTCCCTCTCAACATTGTCTTCATCCACCTTGTGAAGACAGTACCATGCTTG

>Bacillus\_Fam\_1310\_52\_1 Nr. of seq. 1 Alignment length(with gaps) = 52  
Alignment score = 0.000000  
GCF\_001648575.1\_ASM164857v1\_genomic.fna\_63:225987-226623 Satlength=637 Nr  
of Repeats=12 RepeatLength=52 seed=AGATTGTCTT Num.seqs=10  
Similarity=0.777239 0  
AGATTGTCTTCATCACNCTTATAATGACAATCTTGAAGTATTTTCACTGTG

\*\*\*\*\*  
Consensus:

AGATTGTCTTCATCACNCTTATAATGACAATCTTGAAGTATTTTCACTGTG

>Bacillus\_Fam\_1311\_52\_1 Nr. of seq. 1 Alignment length(with gaps) = 52  
Alignment score = 0.000000  
GCF\_001648575.1\_ASM164857v1\_genomic.fna\_66:89204-89675 Satlength=472 Nr  
of Repeats=9 RepeatLength=52 seed=AAGACACTTT Num.seqs=6  
Similarity=0.924786  
0 AAGACACTTTTGCCGTGTTTTTCCTGCTGACATTGTCTTCAGACCACTGATG

\*\*\*\*\*  
Consensus:

AAGACACTTTTGCCGTGTTTTTCCTGCTGACATTGTCTTCAGACCACTGATG

>Bacillus\_Fam\_1312\_52\_1 Nr. of seq. 1 Alignment length(with gaps) = 52  
Alignment score = 0.000000  
GCF\_001712755.1\_ASM171275v1\_genomic.fna\_37:69494-69702 Satlength=209 Nr  
of Repeats=4 RepeatLength=52 seed=CTCATGAACC Num.seqs=4  
Similarity=0.777778  
0 CTCATGAACCGCTTATGAGTAAGTAAAATACATGATTAGATTATTTAGTTA

\*\*\*\*\*  
Consensus:

CTCATGAACCGCTTATGAGTAAGTAAAATACATGATTAGATTATTTAGTTA

>Bacillus\_Fam\_1313\_52\_1 Nr. of seq. 1 Alignment length(with gaps) = 52  
Alignment score = 0.000000  
GCF\_001887185.1\_ASM188718v1\_genomic.fna\_148:402146-402406 Satlength=261  
Nr of Repeats=5 RepeatLength=52 seed=AATGTGTCTC Num.seqs=5  
Similarity=0.792121 0  
AATGTGTCTCAAGAATAGGGTTGGAAACAGATAAACCGGGAATNNCGTTGAA

\*\*\*\*\*  
Consensus:

AATGTGTCTCAAGAATAGGGTTGGAAACAGATAAACCGGGAATNNCGTTGAA

>Bacillus\_Fam\_1314\_52\_1 Nr. of seq. 1 Alignment length(with gaps) = 52  
Alignment score = 0.000000

GCF\_001887185.1\_ASM188718v1\_genomic.fna\_192:110193-111153 Satlength=961  
Nr of Repeats=14 RepeatLength=52 seed=GGTAACCTTT Num.seqs=9  
Similarity=0.749288 0  
GGTAACCTTTCCGGGGCTTTGGTTACCCGGATCTCATCACAGAGCCNACTTC

\*\*\*\*\*  
Consensus:

GGTAACCTTTCCGGGGCTTTGGTTACCCGGATCTCATCACAGAGCCNACTTC

>Bacillus\_Fam\_1315\_52\_1 Nr. of seq. 1 Alignment length(with gaps) = 52  
Alignment score = 0.000000  
GCF\_001887185.1\_ASM188718v1\_genomic.fna\_276:156901-157109 Satlength=209  
Nr of Repeats=4 RepeatLength=52 seed=TCTTCAAGGT Num.seqs=4  
Similarity=0.846154 0  
TCTTCAAGGTAATCAAAAGCTCACAAGGTACCCGAGCCGCCGAATTACCT

\*\*\*\*\*  
Consensus:

TCTTCAAGGTAATCAAAAGCTCACAAGGTACCCGAGCCGCCGAATTACCT

>Bacillus\_Fam\_1316\_52\_1 Nr. of seq. 1 Alignment length(with gaps) = 52  
Alignment score = 0.000000  
GCF\_001887185.1\_ASM188718v1\_genomic.fna\_428:41505-41868 Satlength=364 Nr  
of Repeats=7 RepeatLength=52 seed=TGGAGACACA Num.seqs=6  
Similarity=0.683761  
0 TGGAGACACATTTTATTGCTAAAAAGTAAATAATGTGTTTCAGAACCAGNGC

\*\*\*\*\*  
Consensus:

TGGAGACACATTTTATTGCTAAAAAGTAAATAATGTGTTTCAGAACCAGNGC

>Bacillus\_Fam\_1317\_52\_1 Nr. of seq. 1 Alignment length(with gaps) = 52  
Alignment score = 0.000000  
GCF\_002009555.1\_ASM200955v1\_genomic.fna\_79:0-258 Satlength=259 Nr of  
Repeats=5 RepeatLength=52 seed=TAAGACACAT Num.seqs=4 Similarity=0.709402  
0 TAAGACACATAATGTGACCAAACCCCAAAAAATGTGTCTCACCCGCCAGTCT

\*\*\*\*\*  
Consensus:

TAAGACACATAATGTGACCAAACCCCAAAAAATGTGTCTCACCCGCCAGTCT

>Bacillus\_Fam\_1318\_52\_1 Nr. of seq. 1 Alignment length(with gaps) = 52  
Alignment score = 0.000000  
GCF\_002019605.1\_ASM201960v1\_genomic.fna\_1:2881499-2881761 Satlength=263  
Nr of Repeats=5 RepeatLength=52 seed=CGTTGTTTCG Num.seqs=3  
Similarity=0.825996 0  
CGTTGTTTCGGGCACTATGAACCTCTATAGTTCCAGTCTCTTGCTTCCAT

\*\*\*\*\*  
Consensus:

CGTTGTTTCGGGCACTATGAACCCTCTATAGTTCCCAGTCTCTTGCTTCCAT

>Bacillus\_Fam\_1319\_52\_1 Nr. of seq. 1 Alignment length(with gaps) = 52  
Alignment score = 0.000000  
GCF\_002019605.1\_ASM201960v1\_genomic.fna\_1:3984598-3985376 Satlength=779  
Nr of Repeats=15 RepeatLength=52 seed=CCGTTTGAGC Num.seqs=13  
Similarity=0.911900 0  
CCGTTTGAGCAGCTCGAAGGAGATAGCGGTCACTATGAAAGCGTCATGGTGA

\*\*\*\*\*  
Consensus:

CCGTTTGAGCAGCTCGAAGGAGATAGCGGTCACTATGAAAGCGTCATGGTGA

>Bacillus\_Fam\_1320\_52\_1 Nr. of seq. 1 Alignment length(with gaps) = 52  
Alignment score = 0.000000  
GCF\_002019645.1\_ASM201964v1\_genomic.fna\_1:123004-123368 Satlength=365 Nr  
of Repeats=7 RepeatLength=52 seed=ACTTCAGACA Num.seqs=7  
Similarity=0.857143  
0 ACTTCAGACAACTTCTGCNGCCAATTACTTAAACCTGTCCGAACTCTTGCCT

\*\*\*\*\*  
Consensus:

ACTTCAGACAACTTCTGCNGCCAATTACTTAAACCTGTCCGAACTCTTGCCT

>Bacillus\_Fam\_1321\_52\_1 Nr. of seq. 1 Alignment length(with gaps) = 52  
Alignment score = 0.000000  
GCF\_002019645.1\_ASM201964v1\_genomic.fna\_1:208479-208999 Satlength=521 Nr  
of Repeats=10 RepeatLength=52 seed=GAGCAACTTG Num.seqs=8  
Similarity=0.878205 0  
GAGCAACTTGATCATAGACCTCCTATGATTCACTTCCCTACAATTCATGTGC

\*\*\*\*\*  
Consensus:

GAGCAACTTGATCATAGACCTCCTATGATTCACTTCCCTACAATTCATGTGC

>Bacillus\_Fam\_1322\_52\_1 Nr. of seq. 1 Alignment length(with gaps) = 52  
Alignment score = 0.000000  
GCF\_002019645.1\_ASM201964v1\_genomic.fna\_1:1309331-1310008 Satlength=678  
Nr of Repeats=13 RepeatLength=52 seed=TGTCTGAAGT Num.seqs=12  
Similarity=0.897824 0  
TGTCTGAAGTTGAGNAGCCTTCGGACAGGTTAGAAGCCTACAGAGTAAAAGC

\*\*\*\*\*  
Consensus:

TGTCTGAAGTTGAGNAGCCTTCGGACAGGTTAGAAGCCTACAGAGTAAAAGC

>Bacillus\_Fam\_1323\_52\_1 Nr. of seq. 1 Alignment length(with gaps) = 52  
Alignment score = 0.000000

GCF\_002019645.1\_ASM201964v1\_genomic.fna\_1:1511589-1512577 Satlength=989  
Nr of Repeats=19 RepeatLength=52 seed=AAGCTGTCCG Num.seqs=19  
Similarity=0.906175 0  
AAGCTGTCCGAAGAGAGCTCAGGTTGCTCAGGTTNAGTAGA

\*\*\*\*\*  
Consensus:

AAGCTGTCCGAAGAGAGCTCAGGTTGCTCAGGTTNAGTAGA

>Bacillus\_Fam\_1324\_52\_1 Nr. of seq. 1 Alignment length(with gaps) = 52  
Alignment score = 0.000000  
GCF\_002019645.1\_ASM201964v1\_genomic.fna\_1:2149247-2150387 Satlength=1141  
Nr of Repeats=22 RepeatLength=52 seed=TCTGATTCCC Num.seqs=18  
Similarity=0.902296 0  
TCTGATTCCCTTTTCAGTAGTGNATCGGGGTAGAAAGGGAACGAAAGAGCAAG

\*\*\*\*\*  
Consensus:

TCTGATTCCCTTTTCAGTAGTGNATCGGGGTAGAAAGGGAACGAAAGAGCAAG

>Bacillus\_Fam\_1325\_52\_1 Nr. of seq. 1 Alignment length(with gaps) = 52  
Alignment score = 0.000000  
GCF\_002019645.1\_ASM201964v1\_genomic.fna\_1:2283102-2283310 Satlength=209  
Nr of Repeats=4 RepeatLength=52 seed=AGATTCCCTT Num.seqs=4  
Similarity=0.893162 0  
AGATTCCCTTACTAGGCAAAAATGAAGTGCAAAGGGAACGAAAGGTAGTCAC

\*\*\*\*\*  
Consensus:

AGATTCCCTTACTAGGCAAAAATGAAGTGCAAAGGGAACGAAAGGTAGTCAC

>Bacillus\_Fam\_1326\_52\_1 Nr. of seq. 1 Alignment length(with gaps) = 52  
Alignment score = 0.000000  
GCF\_002019645.1\_ASM201964v1\_genomic.fna\_1:3845277-3845745 Satlength=469  
Nr of Repeats=9 RepeatLength=52 seed=GAAAGCTGTC Num.seqs=9  
Similarity=0.951567 0  
GAAAGCTGTCCGAACCTTCACTTGGGTTTCGGAAGTACTTTTCCTTTACGACCAC

\*\*\*\*\*  
Consensus:

GAAAGCTGTCCGAACCTTCACTTGGGTTTCGGAAGTACTTTTCCTTTACGACCAC

>Bacillus\_Fam\_1327\_52\_1 Nr. of seq. 1 Alignment length(with gaps) = 52  
Alignment score = 0.000000  
GCF\_002019645.1\_ASM201964v1\_genomic.fna\_1:4572662-4573184 Satlength=523  
Nr of Repeats=10 RepeatLength=52 seed=ATTCCCTTTG Num.seqs=8  
Similarity=0.928571 0  
ATTCCCTTTGTTCGAGAAAATACACAGGAAAGGGAACGAAAGGAGCGCTTTG

\*\*\*\*\*



Consensus:

ATTCCCTTTGTCGGAGAAAATACACAGGAAAGGGAACGAAAGGAGCGCTTTG

>Bacillus\_Fam\_1328\_52\_1 Nr. of seq. 1 Alignment length(with gaps) = 52  
Alignment score = 0.000000  
GCF\_002019645.1\_ASM201964v1\_genomic.fna\_1:5404130-5406159 Satlength=2030  
Nr of Repeats=39 RepeatLength=52 seed=AAGCTGTCTG Num.seqs=38  
Similarity=0.813432 0  
AAGCTGTCTGAACCTACCCACCTTCGGACAGCTTGACTCCGAAAAACCCAA

\*\*\*\*\*

Consensus:

AAGCTGTCTGAACCTACCCACCTTCGGACAGCTTGACTCCGAAAAACCCAA

>Bacillus\_Fam\_1329\_52\_1 Nr. of seq. 1 Alignment length(with gaps) = 52  
Alignment score = 0.000000  
GCF\_002019665.1\_ASM201966v1\_genomic.fna\_1:2317880-2318296 Satlength=417  
Nr of Repeats=8 RepeatLength=52 seed=ATTATGGGTA Num.seqs=8  
Similarity=0.907509 0  
ATTATGGGTAACGATAAAGGCGTGATCGTGCCCTGAACTCGAGAATATAGTG

\*\*\*\*\*

Consensus:

ATTATGGGTAACGATAAAGGCGTGATCGTGCCCTGAACTCGAGAATATAGTG

>Bacillus\_Fam\_1330\_52\_1 Nr. of seq. 1 Alignment length(with gaps) = 52  
Alignment score = 0.000000  
GCF\_900104555.1\_IMG-  
taxon\_2651870172\_annotated\_assembly\_genomic.fna\_14:10803-11065  
Satlength=263 Nr of Repeats=5 RepeatLength=52 seed=GAGTCTGAAC Num.seqs=3  
Similarity=0.709402 0  
GAGTCTGAACCTNGCGTGAGTTCGGACAGGAATCGTGANTGTGAATGTAAGC

\*\*\*\*\*

Consensus:

GAGTCTGAACCTNGCGTGAGTTCGGACAGGAATCGTGANTGTGAATGTAAGC

>Bacillus\_Fam\_1331\_52\_1 Nr. of seq. 1 Alignment length(with gaps) = 52  
Alignment score = 0.000000  
GCF\_900104555.1\_IMG-  
taxon\_2651870172\_annotated\_assembly\_genomic.fna\_16:230959-231479  
Satlength=521 Nr of Repeats=10 RepeatLength=52 seed=TGTCCAATAG  
Num.seqs=10 Similarity=0.801709 0  
TGTCCAATAGGATGCCTCTATCGGACATAACTCACTTCCCAAGACTAGATTC

\*\*\*\*\*

Consensus:

TGTCCAATAGGATGCCTCTATCGGACATAACTCACTTCCCAAGACTAGATTC

>Bacillus\_Fam\_1332\_52\_1 Nr. of seq. 1 Alignment length(with gaps) = 52  
Alignment score = 0.000000  
GCF\_900104555.1\_IMG-  
taxon\_2651870172\_annotated\_assembly\_genomic.fna\_19:76324-76687  
Satlength=364 Nr of Repeats=7 RepeatLength=52 seed=ACGGCTCTAT Num.seqs=6  
Similarity=0.829060 0  
ACGGCTCTATCGAACAAACTATGGGCCTTCACGCTTGGTTTGTCCAATAGG

\*\*\*\*\*  
Consensus:

ACGGCTCTATCGAACAAACTATGGGCCTTCACGCTTGGTTTGTCCAATAGG

>Bacillus\_Fam\_1333\_52\_1 Nr. of seq. 1 Alignment length(with gaps) = 52  
Alignment score = 0.000000  
GCF\_900104555.1\_IMG-  
taxon\_2651870172\_annotated\_assembly\_genomic.fna\_22:326079-326390  
Satlength=312 Nr of Repeats=6 RepeatLength=52 seed=CTATTGGACA Num.seqs=5  
Similarity=0.933333 0  
CTATTGGACAAAATCGCTTCACGGCACTGGCGGTTTGTCTAATACAGGCTTC

\*\*\*\*\*  
Consensus:

CTATTGGACAAAATCGCTTCACGGCACTGGCGGTTTGTCTAATACAGGCTTC

>Bacillus\_Fam\_1334\_52\_1 Nr. of seq. 1 Alignment length(with gaps) = 52  
Alignment score = 0.000000  
GCF\_900104555.1\_IMG-  
taxon\_2651870172\_annotated\_assembly\_genomic.fna\_22:581244-581504  
Satlength=261 Nr of Repeats=5 RepeatLength=52 seed=ATCAGAGACC Num.seqs=5  
Similarity=0.804938 0  
ATCAGAGACCTTTGGACAGCTTCTTCGNTTGATATGGTCATTGACACCTCTC

\*\*\*\*\*  
Consensus:

ATCAGAGACCTTTGGACAGCTTCTTCGNTTGATATGGTCATTGACACCTCTC

>Bacillus\_Fam\_1335\_52\_1 Nr. of seq. 1 Alignment length(with gaps) = 52  
Alignment score = 0.000000  
GCF\_900104555.1\_IMG-  
taxon\_2651870172\_annotated\_assembly\_genomic.fna\_24:146667-146929  
Satlength=263 Nr of Repeats=5 RepeatLength=52 seed=TTTTGTCCGA Num.seqs=4  
Similarity=0.935897 0  
TTTTGTCCGATAGAGACCTCTTATTGGACAAAACCTTTGCTGGCACCGTTTCG

\*\*\*\*\*  
Consensus:

TTTTGTCCGATAGAGACCTCTTATTGGACAAAACCTTTGCTGGCACCGTTTCG

>Bacillus\_Fam\_1336\_52\_1 Nr. of seq. 1 Alignment length(with gaps) = 52  
Alignment score = 0.000000

GCF\_900104555.1\_IMG-  
taxon\_2651870172\_annotated\_assembly\_genomic.fna\_27:4426-4682  
Satlength=257 Nr of Repeats=5 RepeatLength=51 seed=ATAAGTGCCC Num.seqs=4  
Similarity=0.786325 0  
ATAAGTGCCCGTTCTAGGGTCCCTAGCAAGGAGAGCGGTCATCTAACTCGAG

\*\*\*\*\*

Consensus:

ATAAGTGCCCGTTCTAGGGTCCCTAGCAAGGAGAGCGGTCATCTAACTCGAG

>Bacillus\_Fam\_1337\_52\_1 Nr. of seq. 1 Alignment length(with gaps) = 52  
Alignment score = 0.000000  
GCF\_900104555.1\_IMG-  
taxon\_2651870172\_annotated\_assembly\_genomic.fna\_27:9518-9884  
Satlength=367 Nr of Repeats=7 RepeatLength=52 seed=ACTTCAGACA Num.seqs=5  
Similarity=0.761538 0  
ACTTCAGACAGAAGAAGGTAAAAGAAGTAAGGGAGAGTCTGAANTNGAAGTG

\*\*\*\*\*

Consensus:

ACTTCAGACAGAAGAAGGTAAAAGAAGTAAGGGAGAGTCTGAANTNGAAGTG

>Bacillus\_Fam\_1338\_52\_1 Nr. of seq. 1 Alignment length(with gaps) = 52  
Alignment score = 0.000000  
GCF\_900104555.1\_IMG-  
taxon\_2651870172\_annotated\_assembly\_genomic.fna\_32:21776-21984  
Satlength=209 Nr of Repeats=4 RepeatLength=52 seed=TTCTATTGGA Num.seqs=4  
Similarity=0.876068 0  
TTCTATTGGACATTCTCATCGATACGAACGCACGTTTTGTCCAATAGACGCC

\*\*\*\*\*

Consensus:

TTCTATTGGACATTCTCATCGATACGAACGCACGTTTTGTCCAATAGACGCC

>Bacillus\_Fam\_1339\_52\_1 Nr. of seq. 1 Alignment length(with gaps) = 52  
Alignment score = 0.000000  
GCF\_900107275.1\_IMG-  
taxon\_2675903024\_annotated\_assembly\_genomic.fna\_18:52517-53042  
Satlength=526 Nr of Repeats=5 RepeatLength=52 seed=AAGAGCAAAT Num.seqs=4  
Similarity=0.927350 0  
AAGAGCAAATCGTTGACGAAACGAGCATTTTGAAAGCTGAACGTCAACGAAT

\*\*\*\*\*

Consensus:

AAGAGCAAATCGTTGACGAAACGAGCATTTTGAAAGCTGAACGTCAACGAAT

>Bacillus\_Fam\_1340\_52\_1 Nr. of seq. 1 Alignment length(with gaps) = 52  
Alignment score = 0.000000  
GCF\_900109925.1\_IMG-  
taxon\_2651870116\_annotated\_assembly\_genomic.fna\_16:495010-495218

Satlength=209 Nr of Repeats=4 RepeatLength=52 seed=TCGTTACCGT Num.seqs=4  
Similarity=0.865226 0  
TCGTTACCGTTTTTGGCGTACTCTTCTGTTTTCGGGCACATTAAACTCTTTN

\*\*\*\*\*

Consensus:

TCGTTACCGTTTTTGGCGTACTCTTCTGTTTTCGGGCACATTAAACTCTTTN

>Bacillus\_Fam\_1341\_52\_1 Nr. of seq. 1 Alignment length(with gaps) = 52  
Alignment score = 0.000000  
GCF\_900109925.1\_IMG-  
taxon\_2651870116\_annotated\_assembly\_genomic.fna\_17:42538-42746  
Satlength=209 Nr of Repeats=4 RepeatLength=52 seed=CACCAAGAGC Num.seqs=4  
Similarity=0.871795 0  
CACCAAGAGCTTTCCTTGGCGCAGTAATATAGGTTTCATCTACTAATAACTG

\*\*\*\*\*

Consensus:

CACCAAGAGCTTTCCTTGGCGCAGTAATATAGGTTTCATCTACTAATAACTG

>Bacillus\_Fam\_1342\_52\_1 Nr. of seq. 1 Alignment length(with gaps) = 52  
Alignment score = 0.000000  
GCF\_900156865.1\_PRJEB18960\_genomic.fna\_3:1290871-1291391 Satlength=521 Nr  
of Repeats=10 RepeatLength=52 seed=GGTCTTCATA Num.seqs=10  
Similarity=0.778917 0  
GGTCTTCATAGCACCGATGAAGACCTGAAACAGTTGGAAACTGCTTCGTACA

\*\*\*\*\*

Consensus:

GGTCTTCATAGCACCGATGAAGACCTGAAACAGTTGGAAACTGCTTCGTACA

>Bacillus\_Fam\_1343\_52\_1 Nr. of seq. 1 Alignment length(with gaps) = 52  
Alignment score = 0.000000  
GCF\_900156865.1\_PRJEB18960\_genomic.fna\_3:2588049-2588340 Satlength=292 Nr  
of Repeats=6 RepeatLength=52 seed=CTCTTCATCT Num.seqs=4  
Similarity=0.809748 0  
CTCTTCATCTCGCTTATGAAGGGGATTTGGATGAGGTAAGTGCCTTGTTTTT

\*\*\*\*\*

Consensus:

CTCTTCATCTCGCTTATGAAGGGGATTTGGATGAGGTAAGTGCCTTGTTTTT

>Bacillus\_Fam\_1344\_52\_1 Nr. of seq. 1 Alignment length(with gaps) = 52  
Alignment score = 0.000000  
GCF\_900156865.1\_PRJEB18960\_genomic.fna\_3:4108755-4109589 Satlength=835 Nr  
of Repeats=16 RepeatLength=52 seed=ATGTCGTCAT Num.seqs=14  
Similarity=0.767535 0  
ATGTCGTCATGAGTGCATGAAGACACAACTCTCCTGGCGAGCGGAAGAAG

\*\*\*\*\*

Consensus:

ATGTCGTCATGAGTGCATGAAGACACAACTCTCCTGGCGAGCGGAAGAAG

>Bacillus\_Fam\_1345\_52\_1 Nr. of seq. 1 Alignment length(with gaps) = 52  
Alignment score = 0.000000  
GCF\_900156865.1\_PRJEB18960\_genomic.fna\_3:4353231-4353439 Satlength=209 Nr  
of Repeats=4 RepeatLength=52 seed=GGAAAACACA Num.seqs=4  
Similarity=0.897436 0  
GGAAAACACAGCAAAAGCCGGATAGAAATCCCCTTCATCAAGGCCATGAAGG

\*\*\*\*\*

Consensus:

GGAAAACACAGCAAAAGCCGGATAGAAATCCCCTTCATCAAGGCCATGAAGG

>Bacillus\_Fam\_1346\_52\_1 Nr. of seq. 1 Alignment length(with gaps) = 52  
Alignment score = 0.000000  
GCF\_900156875.1\_PRJEB18969\_genomic.fna\_10:153192-153608 Satlength=417 Nr  
of Repeats=8 RepeatLength=52 seed=GATGAAGACC Num.seqs=8  
Similarity=0.677402  
0 GATGAAGACCGTTTAAAGGATCCCTCCGNGCCAGAAAAGGTTATCATGGGAGA

\*\*\*\*\*

Consensus:

GATGAAGACCGTTTAAAGGATCCCTCCGNGCCAGAAAAGGTTATCATGGGAGA

>Bacillus\_Fam\_1347\_52\_1 Nr. of seq. 1 Alignment length(with gaps) = 52  
Alignment score = 0.000000  
GCF\_900156875.1\_PRJEB18969\_genomic.fna\_10:1493463-1493980 Satlength=518  
Nr of Repeats=10 RepeatLength=52 seed=ATCTATAAAA Num.seqs=9  
Similarity=0.819801 0  
ATCTATAAAAATGGTCATCATGTACGTGATGAAAACCGAAATCTGGTATGTG

\*\*\*\*\*

Consensus:

ATCTATAAAAATGGTCATCATGTACGTGATGAAAACCGAAATCTGGTATGTG

>Bacillus\_Fam\_1348\_52\_1 Nr. of seq. 1 Alignment length(with gaps) = 52  
Alignment score = 0.000000  
GCF\_900156875.1\_PRJEB18969\_genomic.fna\_11:52363-52884 Satlength=522 Nr of  
Repeats=10 RepeatLength=52 seed=CGGTCTTCAT Num.seqs=7  
Similarity=0.677249  
0 CGGTCTTCATGGCCGGGATGAGAACCGATNTTNCTGATTTCTTTGCGAGAAC

\*\*\*\*\*

Consensus:

CGGTCTTCATGGCCGGGATGAGAACCGATNTTNCTGATTTCTTTGCGAGAAC

>Bacillus\_Fam\_1349\_52\_1 Nr. of seq. 1 Alignment length(with gaps) = 52  
Alignment score = 0.000000

GCF\_900156875.1\_PRJEB18969\_genomic.fna\_11:147252-147512 Satlength=261 Nr  
of Repeats=5 RepeatLength=52 seed=TTGGTTTTCAT Num.seqs=5  
Similarity=0.902564  
0 TGGTTTTCATAAGCGGAATGAAGACCGTTATTAGGGGCTTTGTCCTGCGTAA

\*\*\*\*\*

Consensus:

TTGGTTTTCATAAGCGGAATGAAGACCGTTATTAGGGGCTTTGTCCTGCGTAA

>Bacillus\_Fam\_1350\_52\_1 Nr. of seq. 1 Alignment length(with gaps) = 52

Alignment score = 0.000000

GCF\_900156875.1\_PRJEB18969\_genomic.fna\_11:295252-297644 Satlength=2393 Nr

of Repeats=46 RepeatLength=52 seed=GATGAAGACC Num.seqs=44

Similarity=0.826120

0

GATGAAGACCAATCCATNGGAAGGAGCGCGGGNAAACGGTCATCATCAAGGG

\*\*\*\*\*

Consensus:

GATGAAGACCAATCCATNGGAAGGAGCGCGGGNAAACGGTCATCATCAAGGG

>Bacillus\_Fam\_1351\_52\_1 Nr. of seq. 1 Alignment length(with gaps) = 52

Alignment score = 0.000000

GCF\_900156875.1\_PRJEB18969\_genomic.fna\_11:372186-372602 Satlength=417 Nr

of Repeats=8 RepeatLength=52 seed=GGTTTTCATA Num.seqs=8

Similarity=0.819632

0 GGTTTTCATAGCTGGAATGAAGACCGAAAGTAACGGTGATAGATCGAGTTTA

\*\*\*\*\*

Consensus:

GGTTTTCATAGCTGGAATGAAGACCGAAAGTAACGGTGATAGATCGAGTTTA

>Bacillus\_Fam\_1352\_52\_1 Nr. of seq. 1 Alignment length(with gaps) = 52

Alignment score = 0.000000

GCF\_900156875.1\_PRJEB18969\_genomic.fna\_11:939998-946134 Satlength=6137 Nr

of Repeats=118 RepeatLength=52 seed=TGAGTCTGAA Num.seqs=118

Similarity=0.789356

0

TGAGTCTGAATCCGAAGGTTATTCGGAATCCAGCAAGAGGAAACCCAGGCAT

\*\*\*\*\*

Consensus:

TGAGTCTGAATCCGAAGGTTATTCGGAATCCAGCAAGAGGAAACCCAGGCAT

>Bacillus\_Fam\_1353\_52\_1 Nr. of seq. 1 Alignment length(with gaps) = 52

Alignment score = 0.000000

GCF\_900156875.1\_PRJEB18969\_genomic.fna\_11:1045732-1051088 Satlength=5357

Nr of Repeats=101 RepeatLength=52 seed=TCTTCATAAA Num.seqs=100

Similarity=0.741715

0

TCTTCATAAAGGCAATGAAGACCGTTTGGTTGGTTTTTANAANGNCTTTGG

\*\*\*\*\*

Consensus:

TCTTCATAAAGGCAATGAAGACCGTTTGGTTGGTTTTTTANAANGNCTTTGG

>Bacillus\_Fam\_1354\_52\_1 Nr. of seq. 1 Alignment length(with gaps) = 52  
Alignment score = 0.000000  
GCF\_900156875.1\_PRJEB18969\_genomic.fna\_11:1191426-1193454 Satlength=2029  
Nr of Repeats=39 RepeatLength=52 seed=TTGGTTTCA Num.seqs=39  
Similarity=0.908371 0  
TTGGTTTTCATAACGGCGATGATGACCGTTTGGCTGAGTGCTGGCTTGCTTT

\*\*\*\*\*

Consensus:

TTGGTTTTTCATAACGGCGATGATGACCGTTTGGCTGAGTGCTGGCTTGCTTT

>Bacillus\_Fam\_1355\_52\_1 Nr. of seq. 1 Alignment length(with gaps) = 52  
Alignment score = 0.000000  
GCF\_900156875.1\_PRJEB18969\_genomic.fna\_11:1294995-1295515 Satlength=521  
Nr of Repeats=10 RepeatLength=52 seed=TAAAACTTCA Num.seqs=10  
Similarity=0.839316 0  
TAAAACTTCATGCTTATGGTCCTCATTCAACGGATGATGACCGTTTGCCTTA

\*\*\*\*\*

Consensus:

TAAAACTTCATGCTTATGGTCCTCATTCAACGGATGATGACCGTTTGCCTTA

>Bacillus\_Fam\_1356\_52\_1 Nr. of seq. 1 Alignment length(with gaps) = 52  
Alignment score = 0.000000  
GCF\_900156875.1\_PRJEB18969\_genomic.fna\_11:1698345-1698605 Satlength=261  
Nr of Repeats=5 RepeatLength=52 seed=ATGATGACCG Num.seqs=5  
Similarity=0.640606 0  
ATGATGACCGTTNTTGGTTCATAGAACANAGAACTGGTCTTCATCTGGGCT

\*\*\*\*\*

Consensus:

ATGATGACCGTTNTTGGTTCATAGAACANAGAACTGGTCTTCATCTGGGCT

>Bacillus\_Fam\_1357\_51\_1 Nr. of seq. 1 Alignment length(with gaps) = 51  
Alignment score = 0.000000  
BACILLUS\_PSEUDALCALIPHILUS\_genomic.fna\_1:64392-64647 Satlength=256 Nr of  
Repeats=5 RepeatLength=51 seed=AATACGCAGC Num.seqs=5 Similarity=0.742138  
0 AATACGCAGCAATGAAACCGNAAAAATAGTCCTCAATGCCGCACAAATAAA

\*\*\*\*\*

Consensus:

AATACGCAGCAATGAAACCGNAAAAATAGTCCTCAATGCCGCACAAATAAA

>Bacillus\_Fam\_1358\_51\_1 Nr. of seq. 1 Alignment length(with gaps) = 51  
Alignment score = 0.000000

BACILLUS\_PSEUDALCALIPHILUS\_genomic.fna\_5:600241-600496 Satlength=256 Nr of Repeats=5 RepeatLength=51 seed=GGGGTTACTC Num.seqs=5 Similarity=0.823077  
0 GGGGTTACTCATGAGAAAAGTGAGAGTAAGCCCGAGAAAAGAGAAATGCNC

\*\*\*\*\*

Consensus:

GGGGTTACTCATGAGAAAAGTGAGAGTAAGCCCGAGAAAAGAGAAATGCNC

>Bacillus\_Fam\_1359\_51\_1 Nr. of seq. 1 Alignment length(with gaps) = 51  
Alignment score = 0.000000

BACILLUS\_PSEUDALCALIPHILUS\_genomic.fna\_6:120207-120411 Satlength=205 Nr of Repeats=4 RepeatLength=51 seed=CGTTTCTCTG Num.seqs=4 Similarity=0.801816  
2 ATCGTTTCTCTCGGGCTTCTACTCTTTTTTCCGCCCCGTAACCCCAAGCATC

\*\*\*\*\*

Consensus:

CGTTTCTCTCGGGCTTCTACTCTTTTTTCCGCCCCGTAACCCCAAGCATCAT

>Bacillus\_Fam\_1360\_51\_1 Nr. of seq. 1 Alignment length(with gaps) = 51  
Alignment score = 0.000000

GCF\_000161455.1\_ASM16145v1\_genomic.fna\_1:4028285-4028540 Satlength=256 Nr of Repeats=5 RepeatLength=51 seed=CTAAACAAGA Num.seqs=5  
Similarity=0.874510 0

CTAAACAAGACGAGCAAACACAAAACAAACAACATCAATCTGCTCAAGGTA

\*\*\*\*\*

Consensus:

CTAAACAAGACGAGCAAACACAAAACAAACAACATCAATCTGCTCAAGGTA

>Bacillus\_Fam\_1361\_51\_1 Nr. of seq. 1 Alignment length(with gaps) = 51  
Alignment score = 0.000000

GCF\_000169195.2\_ASM16919v2\_genomic.fna\_1:2424628-2425463 Satlength=836 Nr of Repeats=16 RepeatLength=52 seed=AAAGACAAAA Num.seqs=14  
Similarity=0.612441 0

AAAGACAAAACGNGGNGCCGAGACGAAAGAAATGTCCTTCATAGGGTCATG

\*\*\*\*\*

Consensus:

AAAGACAAAACGNGGNGCCGAGACGAAAGAAATGTCCTTCATAGGGTCATG

>Bacillus\_Fam\_1362\_51\_1 Nr. of seq. 1 Alignment length(with gaps) = 51  
Alignment score = 0.000000

GCF\_000175075.1\_ASM17507v1\_genomic.fna\_33:209101-209305 Satlength=205 Nr of Repeats=4 RepeatLength=51 seed=TGAATGAGGA Num.seqs=4  
Similarity=0.869281

0 TGAATGAGGACAAAGTAAGCGGGAAAACAGAAACATTGTCCTCGTAGGGCG

\*\*\*\*\*

Consensus:



TGAATGAGGACAAAGTAAGCGGAAAACAGAAACATTGTCCTCGTAGGGCG

>Bacillus\_Fam\_1363\_51\_1 Nr. of seq. 1 Alignment length(with gaps) = 51  
Alignment score = 0.000000  
GCF\_000175075.1\_ASM17507v1\_genomic.fna\_46:49896-50202 Satlength=307 Nr of  
Repeats=6 RepeatLength=51 seed=GATGACAAAA Num.seqs=6 Similarity=0.803050  
0 GATGACAAAACCTTCAATGAACNAAGGATTTCTGTCATCGGAAAGCTTCAAC

\*\*\*\*\*  
Consensus:

GATGACAAAACCTTCAATGAACNAAGGATTTCTGTCATCGGAAAGCTTCAAC

>Bacillus\_Fam\_1364\_51\_1 Nr. of seq. 1 Alignment length(with gaps) = 51  
Alignment score = 0.000000  
GCF\_000181495.1\_ASM18149v1\_genomic.fna\_129:1421-1931 Satlength=511 Nr of  
Repeats=10 RepeatLength=51 seed=TAAAGGACGT Num.seqs=10  
Similarity=0.755410  
0 TAAAGGACGTTAACGAGTCAATTTAGAGACTAAAGTCCTATAAACAGCTTN

\*\*\*\*\*  
Consensus:

TAAAGGACGTTAACGAGTCAATTTAGAGACTAAAGTCCTATAAACAGCTTN

>Bacillus\_Fam\_1365\_51\_1 Nr. of seq. 1 Alignment length(with gaps) = 51  
Alignment score = 0.000000  
GCF\_000181495.1\_ASM18149v1\_genomic.fna\_164:12630-13239 Satlength=610 Nr  
of Repeats=12 RepeatLength=51 seed=TATCGTCCTA Num.seqs=11  
Similarity=0.749457 0  
TATCGTCCTATAGAGGGACTTTAAAGGACTTTAATATTGAATGTTGCNAAA

\*\*\*\*\*  
Consensus:

TATCGTCCTATAGAGGGACTTTAAAGGACTTTAATATTGAATGTTGCNAAA

>Bacillus\_Fam\_1366\_51\_1 Nr. of seq. 1 Alignment length(with gaps) = 51  
Alignment score = 0.000000  
GCF\_000242895.2\_ASM24289v3\_genomic.fna\_1:1809966-1810272 Satlength=307 Nr  
of Repeats=6 RepeatLength=51 seed=GTGACCAAAA Num.seqs=6  
Similarity=0.907625 0  
GTGACCAAAAAGAAAAAAGAGAGCTACTTCGGTCACTCCAGAGAATTGGA

\*\*\*\*\*  
Consensus:

GTGACCAAAAAGAAAAAAGAGAGCTACTTCGGTCACTCCAGAGAATTGGA

>Bacillus\_Fam\_1367\_51\_1 Nr. of seq. 1 Alignment length(with gaps) = 51  
Alignment score = 0.000000

GCF\_000245315.1\_ASM24531v1\_genomic.fna\_55:29067-29424 Satlength=358 Nr of Repeats=7 RepeatLength=51 seed=GCACGCTGAG Num.seqs=7 Similarity=0.886710  
0 GCACGCTGAGCCNGCGCTTCGTCAAGAAGAGAAAGCAGCGGCTCAACCGGA

\*\*\*\*\*

Consensus:

GCACGCTGAGCCNGCGCTTCGTCAAGAAGAGAAAGCAGCGGCTCAACCGGA

>Bacillus\_Fam\_1368\_51\_1 Nr. of seq. 1 Alignment length(with gaps) = 51  
Alignment score = 0.000000

GCF\_000292245.2\_ASM29224v2\_genomic.fna\_7:20889-21092 Satlength=204 Nr of Repeats=4 RepeatLength=51 seed=CTTATCCTCC Num.seqs=3 Similarity=0.773420  
0 CTTATCCTCCGTTTTTCGTACCGTATTTTGGCCAGGGAGAATTTTTCATTC

\*\*\*\*\*

Consensus:

CTTATCCTCCGTTTTTCGTACCGTATTTTGGCCAGGGAGAATTTTTCATTC

>Bacillus\_Fam\_1369\_51\_1 Nr. of seq. 1 Alignment length(with gaps) = 51  
Alignment score = 0.000000

GCF\_000292245.2\_ASM29224v2\_genomic.fna\_27:36252-36558 Satlength=307 Nr of Repeats=6 RepeatLength=51 seed=GAAAAAGAAG Num.seqs=6 Similarity=0.839651  
0 GAAAAAGAAGCCGAGCTAGCGGAAGTACGGCGTATAAGGAGTCATGAAGTT

\*\*\*\*\*

Consensus:

GAAAAAGAAGCCGAGCTAGCGGAAGTACGGCGTATAAGGAGTCATGAAGTT

>Bacillus\_Fam\_1370\_51\_1 Nr. of seq. 1 Alignment length(with gaps) = 51  
Alignment score = 0.000000

GCF\_000292245.2\_ASM29224v2\_genomic.fna\_38:108-363 Satlength=256 Nr of Repeats=5 RepeatLength=51 seed=TTTAAAGGAC Num.seqs=5 Similarity=0.900654  
0 TTTAAAGGACAAAAAAGGAAGCCGAAGCTGGAAAGTGTTCCAATAACGAGAG

\*\*\*\*\*

Consensus:

TTTAAAGGACAAAAAAGGAAGCCGAAGCTGGAAAGTGTTCCAATAACGAGAG

>Bacillus\_Fam\_1371\_51\_1 Nr. of seq. 1 Alignment length(with gaps) = 51  
Alignment score = 0.000000

GCF\_000292245.2\_ASM29224v2\_genomic.fna\_38:28715-29235 Satlength=521 Nr of Repeats=10 RepeatLength=52 seed=AGTGAAAAGG Num.seqs=10 Similarity=0.711111  
0 AGTGAAAAGGGAATCAAAGCCCTCAATGATTCCCAAAGAGCCCCAGAACCA

\*\*\*\*\*

Consensus:

AGTGAAAAGGGAATCAAAGCCCTCAATGATTCCCAAAGAGCCCCAGAACCA

>Bacillus\_Fam\_1372\_51\_1 Nr. of seq. 1 Alignment length(with gaps) = 51  
Alignment score = 0.000000  
GCF\_000292245.2\_ASM29224v2\_genomic.fna\_100:13250-13504 Satlength=255 Nr of  
Repeats=5 RepeatLength=51 seed=AATACGCCGA Num.seqs=4  
Similarity=0.869281  
0 AATACGCCGAACCTCCCTTTACTCGGCTCTTTTTTCTGCTTCACAGTTCTA

\*\*\*\*\*  
Consensus:

AATACGCCGAACCTCCCTTTACTCGGCTCTTTTTTCTGCTTCACAGTTCTA

>Bacillus\_Fam\_1373\_51\_1 Nr. of seq. 1 Alignment length(with gaps) = 51  
Alignment score = 0.000000  
GCF\_000292245.2\_ASM29224v2\_genomic.fna\_107:6328-6635 Satlength=308 Nr of  
Repeats=6 RepeatLength=51 seed=GTGCGTATTC Num.seqs=5 Similarity=0.958170  
0 GTGCGTATTCATCTGATTTGGTAATCAAATTTCAACCTGAGCCGAATTACG

\*\*\*\*\*  
Consensus:

GTGCGTATTCATCTGATTTGGTAATCAAATTTCAACCTGAGCCGAATTACG

>Bacillus\_Fam\_1374\_51\_1 Nr. of seq. 1 Alignment length(with gaps) = 51  
Alignment score = 0.000000  
GCF\_000292245.2\_ASM29224v2\_genomic.fna\_122:8353-8558 Satlength=206 Nr of  
Repeats=4 RepeatLength=51 seed=TTTTCATTTAC Num.seqs=3 Similarity=0.808279  
0 TTTTCATTACCTATTATNGTTTATTCAAACCCTAATTGAGNGAGTTTCCCT

\*\*\*\*\*  
Consensus:

TTTTCATTTACCTATTATNGTTTATTCAAACCCTAATTGAGNGAGTTTCCCT

>Bacillus\_Fam\_1375\_51\_1 Nr. of seq. 1 Alignment length(with gaps) = 51  
Alignment score = 0.000000  
GCF\_000307875.1\_BABA1.0\_genomic.fna\_34:35332-35689 Satlength=358 Nr of  
Repeats=7 RepeatLength=51 seed=TTGGTCTTCA Num.seqs=7 Similarity=0.875506  
0 TTGGTCTTCATCCGCTTAATGAAGACCTTTTTTCCGATTTTCGTTTACACTT

\*\*\*\*\*  
Consensus:

TTGGTCTTCATCCGCTTAATGAAGACCTTTTTTCCGATTTTCGTTTACACTT

>Bacillus\_Fam\_1376\_51\_1 Nr. of seq. 1 Alignment length(with gaps) = 51  
Alignment score = 0.000000  
GCF\_000307875.1\_BABA1.0\_genomic.fna\_52:16517-17289 Satlength=773 Nr of  
Repeats=5 RepeatLength=51 seed=CGTTACCTTT Num.seqs=4 Similarity=0.747277  
0 CGTTACCTTTTCTTCGTATTTTCCCATTTTTGGTCACATAGACCCCTTCTA

\*\*\*\*\*  
Consensus:

CGTTACCTTTTCTTCGTATTTTCCCATTTTGGTCACATAGACCCCTTCTA

>Bacillus\_Fam\_1377\_51\_1 Nr. of seq. 1 Alignment length(with gaps) = 51  
Alignment score = 0.000000  
GCF\_000307875.1\_BABA1.0\_genomic.fna\_121:73699-73903 Satlength=205 Nr of  
Repeats=4 RepeatLength=51 seed=GTCACGTAGA Num.seqs=4 Similarity=0.873638  
0 GTCACGTAGAACCTCTCTACGTGACCTCTCCCATGCTTTTTCTCCAAAATA

\*\*\*\*\*  
Consensus:

GTCACGTAGAACCTCTCTACGTGACCTCTCCCATGCTTTTTCTCCAAAATA

>Bacillus\_Fam\_1378\_51\_1 Nr. of seq. 1 Alignment length(with gaps) = 51  
Alignment score = 0.000000  
GCF\_000331575.1\_ASM33157v1\_genomic.fna\_1:1364253-1364865 Satlength=613 Nr  
of Repeats=12 RepeatLength=51 seed=CGCTTTTATC Num.seqs=12  
Similarity=0.887502 0  
CGCTTTTATCGTCACGTAAATGATTTCAACGCGTTTTGCTGATAATAAAT

\*\*\*\*\*  
Consensus:

CGCTTTTATCGTCACGTAAATGATTTCAACGCGTTTTGCTGATAATAAAT

>Bacillus\_Fam\_1379\_51\_1 Nr. of seq. 1 Alignment length(with gaps) = 51  
Alignment score = 0.000000  
GCF\_000331575.1\_ASM33157v1\_genomic.fna\_1:1553326-1553721 Satlength=396 Nr  
of Repeats=4 RepeatLength=51 seed=TCCGTTATTT Num.seqs=3  
Similarity=0.694989 0  
TCCGTTATTTGTCCAAAACCCTATGCTACAGCTATTTNCCGGACACCAGG

\*\*\*\*\*  
Consensus:

TCCGTTATTTGTCCAAAACCCTATGCTACAGCTATTTNCCGGACACCAGG

>Bacillus\_Fam\_1380\_51\_1 Nr. of seq. 1 Alignment length(with gaps) = 51  
Alignment score = 0.000000  
GCF\_000374565.1\_ASM37456v1\_genomic.fna\_9:47516-47873 Satlength=358 Nr of  
Repeats=7 RepeatLength=51 seed=GCTTCAGTTT Num.seqs=7 Similarity=0.841892  
0 GCTTCAGTTTCTTCATCCGAAATCATCTCAGCTGTACCTGCAGGCTCTTTT

\*\*\*\*\*  
Consensus:

GCTTCAGTTTCTTCATCCGAAATCATCTCAGCTGTACCTGCAGGCTCTTTT

>Bacillus\_Fam\_1381\_51\_1 Nr. of seq. 1 Alignment length(with gaps) = 51  
Alignment score = 0.000000  
GCF\_000712595.1\_ASM71259v1\_genomic.fna\_5:211104-211479 Satlength=376 Nr  
of Repeats=4 RepeatLength=51 seed=ATATTTTTTT Num.seqs=3

Similarity=0.912854

0 ATATTTTTTTGAACGTTCTTCACGTTTGCTAGATCGTTTTTCGCGATCATA

\*\*\*\*\*

Consensus:

ATATTTTTTTGAACGTTCTTCACGTTTGCTAGATCGTTTTTCGCGATCATA

>Bacillus\_Fam\_1382\_51\_1 Nr. of seq. 1 Alignment length(with gaps) = 51

Alignment score = 0.000000

GCF\_000752035.1\_Bacillus\_rubiinfantis\_genomic.fna\_11:404655-405420

Satlength=766 Nr of Repeats=15 RepeatLength=51 seed=AGTTGTCCAT

Num.seqs=15 Similarity=0.840842

0

AGTTGTCCATTTGCGNGGGCTATTGGACAACTTTTTCNGAAAAACACCAG

\*\*\*\*\*

Consensus:

AGTTGTCCATTTGCGNGGGCTATTGGACAACTTTTTCNGAAAAACACCAG

>Bacillus\_Fam\_1383\_51\_1 Nr. of seq. 1 Alignment length(with gaps) = 51

Alignment score = 0.000000

GCF\_000752035.1\_Bacillus\_rubiinfantis\_genomic.fna\_11:437106-437412

Satlength=307 Nr of Repeats=6 RepeatLength=51 seed=TTGGACAGCT Num.seqs=6

Similarity=0.864052

0

TTGGACAGCTTCGCGCTATTTTCCAAAAGTTGTCCATTAGACACAAGCTA

\*\*\*\*\*

Consensus:

TTGGACAGCTTCGCGCTATTTTCCAAAAGTTGTCCATTAGACACAAGCTA

>Bacillus\_Fam\_1384\_51\_1 Nr. of seq. 1 Alignment length(with gaps) = 51

Alignment score = 0.000000

GCF\_000752035.1\_Bacillus\_rubiinfantis\_genomic.fna\_30:51081-51439

Satlength=359 Nr of Repeats=7 RepeatLength=51 seed=TTTTCTCTAA Num.seqs=6

Similarity=0.914597

0

TTTTCTCTAATTACGATATTTCTGTCCAATAGGACCTGGCTATTGGACAGG

\*\*\*\*\*

Consensus:

TTTTCTCTAATTACGATATTTCTGTCCAATAGGACCTGGCTATTGGACAGG

>Bacillus\_Fam\_1385\_51\_1 Nr. of seq. 1 Alignment length(with gaps) = 51

Alignment score = 0.000000

GCF\_000986785.1\_ASM98678v1\_genomic.fna\_52:2-207 Satlength=206 Nr of

Repeats=4 RepeatLength=51 seed=CTTGGCGCAA Num.seqs=3 Similarity=0.762821

0 CTTGGCGCAAAAAGTTTCCCGAGGNTGGAGAAATTGCGTTAACGCAGGGT

\*\*\*\*\*

Consensus:

CTTGGCGCAAAAAGTTTCCCGAGGNTGGAGAAATTGCGTTAACGCAGGGT

>Bacillus\_Fam\_1386\_51\_1 Nr. of seq. 1 Alignment length(with gaps) = 51  
Alignment score = 0.000000  
GCF\_001375535.1\_Bacillus\_niameyensis\_genomic.fna\_6:3343036-3343241  
Satlength=206 Nr of Repeats=4 RepeatLength=51 seed=CTCAGAGACA Num.seqs=3  
Similarity=0.773420 0  
CTCAGAGACAAAATCCAGGNAAAAAGTAGNGATTTGTCTCTGATCGGGTGT

\*\*\*\*\*

Consensus:

CTCAGAGACAAAATCCAGGNAAAAAGTAGNGATTTGTCTCTGATCGGGTGT

>Bacillus\_Fam\_1387\_51\_1 Nr. of seq. 1 Alignment length(with gaps) = 51  
Alignment score = 0.000000  
GCF\_001375535.1\_Bacillus\_niameyensis\_genomic.fna\_6:4007424-4007779  
Satlength=356 Nr of Repeats=7 RepeatLength=51 seed=CTTCGGTCGA Num.seqs=5  
Similarity=0.848077 0  
CTTCGGTCGAATAGAAACGCCCTATTTCGCGCATTTCTGTGATTTTCTTTTN

\*\*\*\*\*

Consensus:

CTTCGGTCGAATAGAAACGCCCTATTTCGCGCATTTCTGTGATTTTCTTTTN

>Bacillus\_Fam\_1388\_51\_1 Nr. of seq. 1 Alignment length(with gaps) = 51  
Alignment score = 0.000000  
GCF\_001375535.1\_Bacillus\_niameyensis\_genomic.fna\_6:4072217-4072880  
Satlength=664 Nr of Repeats=13 RepeatLength=51 seed=CGCCCCAATT Num.seqs=13 Similarity=0.887410 0  
CGCCCCAATTCACCCGAAGAAAAGGAAATACACGTCAANGGTCAATAGAT

\*\*\*\*\*

Consensus:

CGCCCCAATTCACCCGAAGAAAAGGAAATACACGTCAANGGTCAATAGAT

>Bacillus\_Fam\_1389\_51\_1 Nr. of seq. 1 Alignment length(with gaps) = 51  
Alignment score = 0.000000  
GCF\_001375535.1\_Bacillus\_niameyensis\_genomic.fna\_6:4237328-4237736  
Satlength=409 Nr of Repeats=8 RepeatLength=51 seed=GGTCGAATAG Num.seqs=6  
Similarity=0.775641 0  
GGTCGAATAGAAGCGATCAATTGACCGTTGCTGGAAAATCCGCTTTGTTT

\*\*\*\*\*

Consensus:

GGTCGAATAGAAGCGATCAATTGACCGTTGCTGGAAAATCCGCTTTGTTT

>Bacillus\_Fam\_1390\_51\_1 Nr. of seq. 1 Alignment length(with gaps) = 51  
Alignment score = 0.000000  
GCF\_001587375.1\_ASM158737v1\_genomic.fna\_14:69179-69489 Satlength=311 Nr  
of Repeats=6 RepeatLength=52 seed=CTTATACATT Num.seqs=4

Similarity=0.611616

0 CTTATACATTTTTCTTTCTTCCCATGAAAATCTATACGCATCCTCCCTTC

\*\*\*\*\*

Consensus:

CTTATACATTTTTCTTTCTTCCCATGAAAATCTATACGCATCCTCCCTTC

>Bacillus\_Fam\_1391\_51\_1 Nr. of seq. 1 Alignment length(with gaps) = 51

Alignment score = 0.000000

GCF\_001591465.1\_ASM159146v1\_genomic.fna\_6:84138-84347 Satlength=210 Nr of

Repeats=4 RepeatLength=52 seed=TTCGGACACA Num.seqs=3 Similarity=0.718107

0 TTCGGACACAGAAAGGGGGAACCCGTGGAATTGAGTCAGAACCCGGNCAAG

\*\*\*\*\*

Consensus:

TTCGGACACAGAAAGGGGGAACCCGTGGAATTGAGTCAGAACCCGGNCAAG

>Bacillus\_Fam\_1392\_51\_1 Nr. of seq. 1 Alignment length(with gaps) = 51

Alignment score = 0.000000

GCF\_001591645.1\_ASM159164v1\_genomic.fna\_12:25703-25906 Satlength=204 Nr

of Repeats=4 RepeatLength=51 seed=TAATCGTTCC Num.seqs=3

Similarity=0.557692

0 TAATCGTTCCCGAAAATGCNGTGTANGAGGCTGGNGGTAATGAATAGGGAG

\*\*\*\*\*

Consensus:

TAATCGTTCCCGAAAATGCNGTGTANGAGGCTGGNGGTAATGAATAGGGAG

>Bacillus\_Fam\_1393\_51\_1 Nr. of seq. 1 Alignment length(with gaps) = 51

Alignment score = 0.000000

GCF\_001636315.1\_ASM163631v1\_genomic.fna\_1:3673042-3673458 Satlength=417

Nr of Repeats=5 RepeatLength=52 seed=ATAGAGCGCG Num.seqs=3

Similarity=0.524904

ATAGAGCGCGTGTCCAGTAATTTATTGGAAAAGGCGTCCTATGAACCATTC

0

\*\*\*\*\*

Consensus:

ATAGAGCGCGTGTCCAGTAATTTATTGGAAAAGGCGTCCTATGAACCATTC

>Bacillus\_Fam\_1394\_51\_1 Nr. of seq. 1 Alignment length(with gaps) = 51

Alignment score = 0.000000

GCF\_001636325.1\_ASM163632v1\_genomic.fna\_1:1408479-1409142 Satlength=664

Nr of Repeats=13 RepeatLength=51 seed=AAAATGGTCC Num.seqs=13

Similarity=0.876655

AAAATGGTCCTAGTTACCAAACCTGGAACCAAAATCAAGAAAGACAGCGTA

0

\*\*\*\*\*

Consensus:

AAAATGGTCCTAGTTACCAAACCTGGAACCAAAATCAAGAAAGACAGCGTA

>Bacillus\_Fam\_1395\_51\_1 Nr. of seq. 1 Alignment length(with gaps) = 51  
Alignment score = 0.000000  
GCF\_001636325.1\_ASM163632v1\_genomic.fna\_2:1137164-1137571 Satlength=408  
Nr of Repeats=8 RepeatLength=51 seed=AACTGTGACC Num.seqs=7  
Similarity=0.925303 0  
AACTGTGACCAAAAATGGCGGAGAAATCAAAAAACGGTCACAGAGTGTAA

\*\*\*\*\*

Consensus:

AACTGTGACCAAAAATGGCGGAGAAATCAAAAAACGGTCACAGAGTGTAA

>Bacillus\_Fam\_1396\_51\_1 Nr. of seq. 1 Alignment length(with gaps) = 51  
Alignment score = 0.000000  
GCF\_001636335.1\_ASM163633v1\_genomic.fna\_2:629683-630193 Satlength=511 Nr  
of Repeats=10 RepeatLength=51 seed=AAAAAAGTA Num.seqs=10  
Similarity=0.933188 0  
AAAAAAGTAAAAAACATGTAAAGAGTCTCATAGGAGCATTCAATGGGAC

\*\*\*\*\*

Consensus:

AAAAAAGTAAAAAACATGTAAAGAGTCTCATAGGAGCATTCAATGGGAC

>Bacillus\_Fam\_1397\_51\_1 Nr. of seq. 1 Alignment length(with gaps) = 51  
Alignment score = 0.000000  
GCF\_002019605.1\_ASM201960v1\_genomic.fna\_1:4244978-4245368 Satlength=391  
Nr of Repeats=8 RepeatLength=51 seed=TAAAAGAGAA Num.seqs=6  
Similarity=0.839651 0  
TAAAAGAGAACTTAGGATGAATAGCTTCCACAACTGTAAGTGGAAGCATC

\*\*\*\*\*

Consensus:

TAAAAGAGAACTTAGGATGAATAGCTTCCACAACTGTAAGTGGAAGCATC

>Bacillus\_Fam\_1398\_51\_1 Nr. of seq. 1 Alignment length(with gaps) = 51  
Alignment score = 0.000000  
GCF\_002019605.1\_ASM201960v1\_genomic.fna\_1:5051740-5052045 Satlength=306  
Nr of Repeats=6 RepeatLength=51 seed=GACTTTAGAG Num.seqs=5  
Similarity=0.725490 0  
GACTTTAGAGNACATTNCTTCCTNATACTGGTAATTAAAGGAGCTAAGATT

\*\*\*\*\*

Consensus:

GACTTTAGAGNACATTNCTTCCTNATACTGGTAATTAAAGGAGCTAAGATT

>Bacillus\_Fam\_1399\_51\_1 Nr. of seq. 1 Alignment length(with gaps) = 51  
Alignment score = 0.000000  
GCF\_002019665.1\_ASM201966v1\_genomic.fna\_1:947086-947749 Satlength=664 Nr  
of Repeats=13 RepeatLength=51 seed=GGATTTTGGA Num.seqs=13



Similarity=0.922574 0  
GGATTTTGAAGAAGGGAAAAGCATGCCCCCAAAGTGGCGTTAGGATACAT

\*\*\*\*\*  
Consensus:

GGATTTTGAAGAAGGGAAAAGCATGCCCCCAAAGTGGCGTTAGGATACAT

>Bacillus\_Fam\_1400\_51\_1 Nr. of seq. 1 Alignment length(with gaps) = 51  
Alignment score = 0.000000  
GCF\_002019665.1\_ASM201966v1\_genomic.fna\_1:3812725-3813857 Satlength=1133  
Nr of Repeats=21 RepeatLength=51 seed=TTCTATTACC Num.seqs=15  
Similarity=0.838655 0  
TTCTATTACCTCTATCCTGCTTTTGGCGATCACCTTTTCGGCTTCGGGCTT

\*\*\*\*\*  
Consensus:

TTCTATTACCTCTATCCTGCTTTTGGCGATCACCTTTTCGGCTTCGGGCTT

>Bacillus\_Fam\_1401\_51\_1 Nr. of seq. 1 Alignment length(with gaps) = 51  
Alignment score = 0.000000  
GCF\_900094975.1\_IMG-  
taxon\_2617270721\_annotated\_assembly\_genomic.fna\_13:191015-191219  
Satlength=205 Nr of Repeats=4 RepeatLength=51 seed=CCATCCGGAA Num.seqs=4  
Similarity=0.856209 0  
CCATCCGGAAAGTGGTGGAAAGATTTTCATCCCCTGCAAGTTCTACCCCAGTC

\*\*\*\*\*  
Consensus:

CCATCCGGAAAGTGGTGGAAAGATTTTCATCCCCTGCAAGTTCTACCCCAGTC

>Bacillus\_Fam\_1402\_51\_1 Nr. of seq. 1 Alignment length(with gaps) = 51  
Alignment score = 0.000000  
GCF\_900104555.1\_IMG-  
taxon\_2651870172\_annotated\_assembly\_genomic.fna\_20:425714-425918  
Satlength=205 Nr of Repeats=4 RepeatLength=51 seed=CATCCTTCAC Num.seqs=4  
Similarity=0.825472 0  
CATCCTTCACCATGATCACGGGCACTTATCTCCTCTTTGGTTACCTCTTTT

\*\*\*\*\*  
Consensus:

CATCCTTCACCATGATCACGGGCACTTATCTCCTCTTTGGTTACCTCTTTT

>Bacillus\_Fam\_1403\_51\_1 Nr. of seq. 1 Alignment length(with gaps) = 51  
Alignment score = 0.000000  
GCF\_900104555.1\_IMG-  
taxon\_2651870172\_annotated\_assembly\_genomic.fna\_22:4620-4862  
Satlength=243 Nr of Repeats=4 RepeatLength=51 seed=TTTGGGGAAC Num.seqs=3  
Similarity=0.728632 0  
TTTGGGGAACCTATCTCGGCTTTGGTTACCTTTTCCTTGGCTTCGGNTCGA

\*\*\*\*\*

Consensus:

TTTGGGGAACCTATCTCGGCTTTGGTTACCTTTTCCTTGGCTTCGGNTCGA

>Bacillus\_Fam\_1404\_51\_1 Nr. of seq. 1 Alignment length(with gaps) = 51  
Alignment score = 0.000000

GCF\_900156875.1\_PRJEB18969\_genomic.fna\_11:2558203-2558548 Satlength=346  
Nr of Repeats=4 RepeatLength=51 seed=TTCTTCAACA Num.seqs=3

Similarity=0.825708

0

TTCTTCAACAGCCTCTATTGCTTGTGGGACGGATTCTCGGTCATTTCCAC

\*\*\*\*\*

Consensus:

TTCTTCAACAGCCTCTATTGCTTGTGGGACGGATTCTCGGTCATTTCCAC

>Bacillus\_Fam\_1405\_50\_1 Nr. of seq. 1 Alignment length(with gaps) = 50  
Alignment score = 0.000000

GCF\_000331575.1\_ASM33157v1\_genomic.fna\_4:7266-7566 Satlength=301 Nr of  
Repeats=6 RepeatLength=50 seed=CGACTGCCAC Num.seqs=6 Similarity=0.752889

0 CGACTGCCACTATTTGGAAAACAAAATGCACACACACTCATTTACCGCCT

\*\*\*\*\*

Consensus:

CGACTGCCACTATTTGGAAAACAAAATGCACACACACTCATTTACCGCCT

>Bacillus\_Fam\_1406\_50\_1 Nr. of seq. 1 Alignment length(with gaps) = 50  
Alignment score = 0.000000

GCF\_000751775.1\_A1A\_genomic.fna\_12:25055-25349 Satlength=295 Nr of  
Repeats=6 RepeatLength=49 seed=TTTAAAATCA Num.seqs=6 Similarity=0.703111

0 TTTAAAATCAAAGGAATAGATTGTGGTCGGGTNAAATCAAGTAGCTCACT

\*\*\*\*\*

Consensus:

TTTAAAATCAAAGGAATAGATTGTGGTCGGGTNAAATCAAGTAGCTCACT

>Bacillus\_Fam\_1407\_48\_1 Nr. of seq. 1 Alignment length(with gaps) = 48  
Alignment score = 0.000000

GCF\_000186145.1\_Bacillus\_sp\_2\_A\_57\_CT2\_V1\_genomic.fna\_41:18-465  
Satlength=448 Nr of Repeats=7 RepeatLength=48 seed=GCGATGATGC Num.seqs=5

Similarity=0.983333

0

GCGATGATGCCGAGATGCCGCATCAGATGCCACATCAGGTGCAGGGA

\*\*\*\*\*

Consensus:

GCGATGATGCCGAGATGCCGCATCAGATGCCACATCAGGTGCAGGGA

>Bacillus\_Fam\_1408\_48\_1 Nr. of seq. 1 Alignment length(with gaps) = 48  
Alignment score = 0.000000

GCF\_000299035.1\_ASM29903v1\_genomic.fna\_27:4592-4928 Satlength=337 Nr of Repeats=7 RepeatLength=48 seed=TCAGCCAGAA Num.seqs=7 Similarity=0.952381  
0 TCAGCCAGAAAACAACGGAAAAGGATATAAACAAGAAAATAGAGAGTC

\*\*\*\*\*

Consensus:

TCAGCCAGAAAACAACGGAAAAGGATATAAACAAGAAAATAGAGAGTC

>Bacillus\_Fam\_1409\_48\_1 Nr. of seq. 1 Alignment length(with gaps) = 48  
Alignment score = 0.000000

GCF\_000307855.1\_BAZ01.0\_genomic.fna\_111:42295-42598 Satlength=304 Nr of Repeats=4 RepeatLength=48 seed=GGGATGCCGC Num.seqs=3 Similarity=0.888889  
0 GGGATGCCGCTAAATCCGGCTCCTGGTACCCCTCCATAACCTGCTGGT

\*\*\*\*\*

Consensus:

GGGATGCCGCTAAATCCGGCTCCTGGTACCCCTCCATAACCTGCTGGT

>Bacillus\_Fam\_1410\_48\_1 Nr. of seq. 1 Alignment length(with gaps) = 48  
Alignment score = 0.000000

GCF\_000430785.1\_ASM43078v1\_genomic.fna\_5:99863-100391 Satlength=529 Nr of Repeats=11 RepeatLength=48 seed=AAACCAACAG Num.seqs=11  
Similarity=0.825253  
0 AAACCAACAGAGTCAGCATCATTGAGCAATGCTGCATAATCATCTTGT

\*\*\*\*\*

Consensus:

AAACCAACAGAGTCAGCATCATTGAGCAATGCTGCATAATCATCTTGT

>Bacillus\_Fam\_1411\_48\_1 Nr. of seq. 1 Alignment length(with gaps) = 48  
Alignment score = 0.000000

GCF\_000504145.1\_SOAPdenovo\_for\_version2.04\_of\_Bacillus\_sp.\_FJAT-14515\_genome\_genomic.fna\_27:69414-69702 Satlength=289 Nr of Repeats=6 RepeatLength=48 seed=TCATTTGCTG Num.seqs=6 Similarity=0.962963  
0 TCATTTGCTGTCCTGAATACATTGGAGAAGGTATGCTAGAAATATGGCC

\*\*\*\*\*

Consensus:

TCATTTGCTGTCCTGAATACATTGGAGAAGGTATGCTAGAAATATGGCC

>Bacillus\_Fam\_1412\_48\_1 Nr. of seq. 1 Alignment length(with gaps) = 48  
Alignment score = 0.000000

GCF\_000615945.1\_ASM61594v1\_genomic.fna\_79:12436-12628 Satlength=193 Nr of Repeats=4 RepeatLength=48 seed=AGCCCGATGA Num.seqs=4 Similarity=0.939815  
0 AGCCCGATGAGAAATTACTATAGAGCGATTGATCAGCACGTGACCGAT

\*\*\*\*\*

Consensus:

AGCCCGATGAGAAATTACTATAGAGCGATTGATCAGCACGTGACCGAT

>Bacillus\_Fam\_1413\_48\_1 Nr. of seq. 1 Alignment length(with gaps) = 48  
Alignment score = 0.000000  
GCF\_000787375.1\_ASM78737v1\_genomic.fna\_23:9-231 Satlength=223 Nr of  
Repeats=5 RepeatLength=48 seed=GCTTCTTCTG Num.seqs=4 Similarity=0.925926  
0 GCTTCTTCTGTTGTTTCCTCTTCTTGGCCTTCTTCATCTACAGCATCC

\*\*\*\*\*

Consensus:

GCTTCTTCTGTTGTTTCCTCTTCTTGGCCTTCTTCATCTACAGCATCC

>Bacillus\_Fam\_1414\_48\_1 Nr. of seq. 1 Alignment length(with gaps) = 48  
Alignment score = 0.000000  
GCF\_000812025.2\_ASM81202v2\_genomic.fna\_60:32692-32932 Satlength=241 Nr of  
Repeats=5 RepeatLength=48 seed=GCAAAGAAAAG Num.seqs=5 Similarity=0.904082  
0 GCAAAGAAAAGAAGCCGAAGAACAAGCGAAACGAGAGGCTGAAGAACAG

\*\*\*\*\*

Consensus:

GCAAAGAAAAGAAGCCGAAGAACAAGCGAAACGAGAGGCTGAAGAACAG

>Bacillus\_Fam\_1415\_48\_1 Nr. of seq. 1 Alignment length(with gaps) = 48  
Alignment score = 0.000000  
GCF\_001274775.1\_ASM127477v1\_genomic.fna\_3:296300-296492 Satlength=193 Nr  
of Repeats=4 RepeatLength=48 seed=GGTGTGATGG Num.seqs=4  
Similarity=0.888889  
0 GGTGTGATGGGAGCAGAGATGCATCATCAGATGCCGATGGGTCAGCCG

\*\*\*\*\*

Consensus:

GGTGTGATGGGAGCAGAGATGCATCATCAGATGCCGATGGGTCAGCCG

>Bacillus\_Fam\_1416\_48\_1 Nr. of seq. 1 Alignment length(with gaps) = 48  
Alignment score = 0.000000  
GCF\_001278705.1\_ASM127870v1\_genomic.fna\_1:2286101-2286677 Satlength=577  
Nr of Repeats=12 RepeatLength=48 seed=TTAGAAAGAA Num.seqs=12  
Similarity=0.986111 0  
TTAGAAAGAAGCAGAGACAGAAGTTCGGAAGCAGTGTGGACAATGAC

\*\*\*\*\*

Consensus:

TTAGAAAGAAGCAGAGACAGAAGTTCGGAAGCAGTGTGGACAATGAC

>Bacillus\_Fam\_1417\_48\_1 Nr. of seq. 1 Alignment length(with gaps) = 48  
Alignment score = 0.000000  
GCF\_001578185.1\_ASM157818v1\_genomic.fna\_1:5252350-5252542 Satlength=193  
Nr of Repeats=4 RepeatLength=48 seed=CGGCCTCCCC Num.seqs=4  
Similarity=0.949074 0  
CGGCCTCCCCGCGAATCCTCACGTTTAGGTCCGCGGCTGTTTCCATC

\*\*\*\*\*

Consensus:

CGGCCTCCCCGCGAATCCTCACGTTTAGGTCCGCGGCTGTTTCCATC

>Bacillus\_Fam\_1418\_48\_1 Nr. of seq. 1 Alignment length(with gaps) = 48

Alignment score = 0.000000

GCF\_001578205.1\_ASM157820v1\_genomic.fna\_1:1115267-1115459 Satlength=193

Nr of Repeats=4 RepeatLength=48 seed=CATCATAAGA Num.seqs=4

Similarity=0.902778

0

CATCATAAGAAGAGCTGCCGCAAGTCACATCGCAGCAAGCACAGATCG

\*\*\*\*\*

Consensus:

CATCATAAGAAGAGCTGCCGCAAGTCACATCGCAGCAAGCACAGATCG

>Bacillus\_Fam\_1419\_48\_1 Nr. of seq. 1 Alignment length(with gaps) = 48

Alignment score = 0.000000

GCF\_001590785.1\_ASM159078v1\_genomic.fna\_12:121693-122077 Satlength=385 Nr

of Repeats=8 RepeatLength=48 seed=ATGCCGTGGC Num.seqs=8

Similarity=0.957341

0

ATGCCGTGGCAAAATGGGATGATGCCAATGCCTGGACAGCAGGAAGGA

\*\*\*\*\*

Consensus:

ATGCCGTGGCAAAATGGGATGATGCCAATGCCTGGACAGCAGGAAGGA

>Bacillus\_Fam\_1420\_48\_1 Nr. of seq. 1 Alignment length(with gaps) = 48

Alignment score = 0.000000

GCF\_001592005.1\_ASM159200v1\_genomic.fna\_4:110265-110505 Satlength=241 Nr

of Repeats=5 RepeatLength=48 seed=TATAAGAAGG Num.seqs=5

Similarity=0.894444

0 TATAAGAAGGACTACTACTACCATGAGCCTTACAAGAAGCATCACGAG

\*\*\*\*\*

Consensus:

TATAAGAAGGACTACTACTACCATGAGCCTTACAAGAAGCATCACGAG

>Bacillus\_Fam\_1421\_48\_1 Nr. of seq. 1 Alignment length(with gaps) = 48

Alignment score = 0.000000

GCF\_900109925.1\_IMG-

taxon\_2651870116\_annotated\_assembly\_genomic.fna\_12:1886-2102

Satlength=217 Nr of Repeats=5 RepeatLength=48 seed=CTGTTCTTC Num.seqs=4

Similarity=0.740741

0

CTGTTCTTCATCCGAACCAGGGCGGTTCTTCTTCCGGCTCATCTC

\*\*\*\*\*

Consensus:

CTGTTCTTCATCCGAACCAGGGCGGTTCTTCTTCCGGCTCATCTC

>Bacillus\_Fam\_1422\_47\_1 Nr. of seq. 1 Alignment length(with gaps) = 47  
Alignment score = 0.000000  
GCF\_001895885.1\_ASM189588v1\_genomic.fna\_2:13546-13781 Satlength=236 Nr of  
Repeats=5 RepeatLength=47 seed=AAACACGAGT Num.seqs=5 Similarity=0.971631  
0 AAACACGAGTAAGAATATGAATTATTCAGCTACCTTGATTACGTTTA

\*\*\*\*\*  
Consensus:

AAACACGAGTAAGAATATGAATTATTCAGCTACCTTGATTACGTTTA

>Bacillus\_Fam\_1423\_45\_1 Nr. of seq. 1 Alignment length(with gaps) = 45  
Alignment score = 0.000000  
GCF\_000161455.1\_ASM16145v1\_genomic.fna\_1:4518727-4518952 Satlength=226 Nr  
of Repeats=5 RepeatLength=45 seed=TTGTTGATTT Num.seqs=5  
Similarity=0.855556 0  
TTGTTGATTTCTCTTCTTTTTTACCTTTTTTCATCAGCTGAACCGC

\*\*\*\*\*  
Consensus:

TTGTTGATTTCTCTTCTTTTTTACCTTTTTTCATCAGCTGAACCGC

>Bacillus\_Fam\_1424\_45\_1 Nr. of seq. 1 Alignment length(with gaps) = 45  
Alignment score = 0.000000  
GCF\_000161455.1\_ASM16145v1\_genomic.fna\_1:5389248-5389428 Satlength=181 Nr  
of Repeats=4 RepeatLength=45 seed=CACCATCAAAG Num.seqs=4  
Similarity=0.906173 0  
CACCATCAAAGTACAACAGGTGGATCTCAATCAAGTGGTGGAGGAG

\*\*\*\*\*  
Consensus:

CACCATCAAAGTACAACAGGTGGATCTCAATCAAGTGGTGGAGGAG

>Bacillus\_Fam\_1425\_45\_1 Nr. of seq. 1 Alignment length(with gaps) = 45  
Alignment score = 0.000000  
GCF\_000334155.1\_L1\_genomic.fna\_18:2736-3096 Satlength=361 Nr of Repeats=8  
RepeatLength=45 seed=GCCCGAAGCA Num.seqs=6 Similarity=0.871605  
0 GCCCGAAGCATTAGGGGTCAGNGCAGAAGTGCCCGAGAGCGTGAGA

\*\*\*\*\*  
Consensus:

GCCCGAAGCATTAGGGGTCAGNGCAGAAGTGCCCGAGAGCGTGAGA

>Bacillus\_Fam\_1426\_45\_1 Nr. of seq. 1 Alignment length(with gaps) = 45  
Alignment score = 0.000000  
GCF\_000473245.1\_ASM47324v1\_genomic.fna\_1:550520-550790 Satlength=271 Nr  
of Repeats=5 RepeatLength=45 seed=CCGGAGTTTT Num.seqs=4  
Similarity=0.624691  
0 CCGGAGTATTAACAGAAATAGAATCACACACATCGACATCGACAA

\*\*\*\*\*

Consensus:

CCGGAGTATTAACAGAAATAGAATCACACACATCGACATCGACAA

>Bacillus\_Fam\_1427\_45\_1 Nr. of seq. 1 Alignment length(with gaps) = 45  
Alignment score = 0.000000

GCF\_000712595.1\_ASM71259v1\_genomic.fna\_33:9174-9894 Satlength=721 Nr of  
Repeats=16 RepeatLength=45 seed=TCCTTGTTGGT Num.seqs=16  
Similarity=0.978519

0 TCCTTGTTGGTCCAGTGGGACCGATAGGCCCTGGTTCCTTGTGA

\*\*\*\*\*

Consensus:

TCCTTGTTGGTCCAGTGGGACCGATAGGCCCTGGTTCCTTGTGA

>Bacillus\_Fam\_1428\_45\_1 Nr. of seq. 1 Alignment length(with gaps) = 45  
Alignment score = 0.000000

GCF\_000712595.1\_ASM71259v1\_genomic.fna\_43:3917-4656 Satlength=740 Nr of  
Repeats=5 RepeatLength=45 seed=GAGCAATCTA Num.seqs=3 Similarity=0.980247

0 GAGCAATCTAGTAATTATTGACGGTATCAGCCGTTATCTGAACTT

\*\*\*\*\*

Consensus:

GAGCAATCTAGTAATTATTGACGGTATCAGCCGTTATCTGAACTT

>Bacillus\_Fam\_1429\_45\_1 Nr. of seq. 1 Alignment length(with gaps) = 45  
Alignment score = 0.000000

GCF\_000712615.1\_ASM71261v1\_genomic.fna\_3:111271-111496 Satlength=226 Nr  
of Repeats=5 RepeatLength=45 seed=TCTTGAGTTT Num.seqs=5  
Similarity=0.857778

0 TCTTGAGTTTGCTGAGATACGTGTTGATTTTGTGACGTTGAGGT

\*\*\*\*\*

Consensus:

TCTTGAGTTTGCTGAGATACGTGTTGATTTTGTGACGTTGAGGT

>Bacillus\_Fam\_1430\_45\_1 Nr. of seq. 1 Alignment length(with gaps) = 45  
Alignment score = 0.000000

GCF\_000712615.1\_ASM71261v1\_genomic.fna\_42:5062-5242 Satlength=181 Nr of  
Repeats=4 RepeatLength=45 seed=GGAACAGAAA Num.seqs=4 Similarity=0.901235

0 GGAACAGAAAGACAAGGAATGGGTGAAGGAAATGCAGTTCCAGTA

\*\*\*\*\*

Consensus:

GGAACAGAAAGACAAGGAATGGGTGAAGGAAATGCAGTTCCAGTA

>Bacillus\_Fam\_1431\_45\_1 Nr. of seq. 1 Alignment length(with gaps) = 45  
Alignment score = 0.000000

GCF\_000724485.1\_ASM72448v1\_genomic.fna\_1:2469191-2469371 Satlength=181 Nr of Repeats=4 RepeatLength=45 seed=TGTATCGGTG Num.seqs=4  
Similarity=0.777778 0  
TGTATCGGTGAAACGGGCATTTGCTTTTCTACTTTAGGAAATTC

\*\*\*\*\*

Consensus:

TGTATCGGTGAAACGGGCATTTGCTTTTCTACTTTAGGAAATTC

>Bacillus\_Fam\_1432\_45\_1 Nr. of seq. 1 Alignment length(with gaps) = 45  
Alignment score = 0.000000  
GCF\_000752395.1\_Bacillus\_andreraoultii\_genomic.fna\_22:32281-32461  
Satlength=181 Nr of Repeats=5 RepeatLength=45 seed=GATAAACCGG Num.seqs=3  
Similarity=0.822222 0  
GATAAACCGGATGGCGAGAATCCAGATGTAGACAAGCCTGACACG

\*\*\*\*\*

Consensus:

GATAAACCGGATGGCGAGAATCCAGATGTAGACAAGCCTGACACG

>Bacillus\_Fam\_1433\_45\_1 Nr. of seq. 1 Alignment length(with gaps) = 45  
Alignment score = 0.000000  
GCF\_000812025.2\_ASM81202v2\_genomic.fna\_70:2588-3101 Satlength=514 Nr of Repeats=9 RepeatLength=45 seed=TCTGTGCCTT Num.seqs=6 Similarity=0.747160  
0 TCTGTGCCTTCCGTTTCCTTCGGTTACCGCTTCTGCTCCTGTGTCG

\*\*\*\*\*

Consensus:

TCTGTGCCTTCCGTTTCCTTCGGTTACCGCTTCTGCTCCTGTGTCG

>Bacillus\_Fam\_1434\_45\_1 Nr. of seq. 1 Alignment length(with gaps) = 45  
Alignment score = 0.000000  
GCF\_001591425.1\_ASM159142v1\_genomic.fna\_9:41557-41833 Satlength=277 Nr of Repeats=4 RepeatLength=45 seed=TTTTCCTCTT Num.seqs=3 Similarity=0.812346  
0 TTTTCCTCTTTAGGAGGAGTTGGATTCTGAAGGCTTNGGAGCCGGT

\*\*\*\*\*

Consensus:

TTTTCCTCTTTAGGAGGAGTTGGATTCTGAAGGCTTNGGAGCCGGT

>Bacillus\_Fam\_1435\_45\_1 Nr. of seq. 1 Alignment length(with gaps) = 45  
Alignment score = 0.000000  
GCF\_001591425.1\_ASM159142v1\_genomic.fna\_27:20593-20812 Satlength=220 Nr of Repeats=5 RepeatLength=45 seed=CTCATGAAGA Num.seqs=4  
Similarity=0.891358  
0 CTCATGAAGAAGATCACGACCACGATCACGACCATGAACACGATG

\*\*\*\*\*

Consensus:



CTCATGAAGAAGATCACGACCACGATCACGACCATGAACACGATG

>Bacillus\_Fam\_1436\_45\_1 Nr. of seq. 1 Alignment length(with gaps) = 45  
Alignment score = 0.000000

GCF\_001636315.1\_ASM163631v1\_genomic.fna\_1:2589898-2590303 Satlength=406

Nr of Repeats=8 RepeatLength=45 seed=TCCTCTTCAT Num.seqs=7

Similarity=0.893030

0

TCCTCTTCATCTATAAAAGAGCTCTCTTCTTGGGGAGAACTGGAT

\*\*\*\*\*

Consensus:

TCCTCTTCATCTATAAAAGAGCTCTCTTCTTGGGGAGAACTGGAT

>Bacillus\_Fam\_1437\_45\_1 Nr. of seq. 1 Alignment length(with gaps) = 45  
Alignment score = 0.000000

GCF\_001645555.1\_ASM164555v1\_genomic.fna\_43:255404-255833 Satlength=430 Nr

of Repeats=11 RepeatLength=45 seed=CCATTATTTC Num.seqs=8

Similarity=0.780952

0

CCATTATTTCCTTGCGAGCCTCTTCCGTTGTTCTCTTGCCCATTC

\*\*\*\*\*

Consensus:

CCATTATTTCCTTGCGAGCCTCTTCCGTTGTTCTCTTGCCCATTC

>Bacillus\_Fam\_1438\_45\_1 Nr. of seq. 1 Alignment length(with gaps) = 45  
Alignment score = 0.000000

GCF\_001896335.1\_ASM189633v1\_genomic.fna\_15:81928-82711 Satlength=784 Nr

of Repeats=7 RepeatLength=45 seed=GCTCCGGTTA Num.seqs=6

Similarity=0.920988

0 GCTCCGGTTACTCCGGTCGCTCCCGTATCTCCCGTTGCACCTGTG

\*\*\*\*\*

Consensus:

GCTCCGGTTACTCCGGTCGCTCCCGTATCTCCCGTTGCACCTGTG

>Bacillus\_Fam\_1439\_43\_1 Nr. of seq. 1 Alignment length(with gaps) = 43  
Alignment score = 0.000000

GCF\_000175075.1\_ASM17507v1\_genomic.fna\_7:5367-5580 Satlength=214 Nr of

Repeats=5 RepeatLength=43 seed=AAAACCTTCT Num.seqs=3 Similarity=0.958656

0 AAAACCTTCTAACAAAGATCCAACCCCAACCCCTAGTTACCCA

\*\*\*\*\*

Consensus:

AAAACCTTCTAACAAAGATCCAACCCCAACCCCTAGTTACCCA

>Bacillus\_Fam\_1440\_43\_1 Nr. of seq. 1 Alignment length(with gaps) = 43  
Alignment score = 0.000000

GCF\_001591445.1\_ASM159144v1\_genomic.fna\_9:156414-156582 Satlength=169 Nr

of Repeats=4 RepeatLength=42 seed=GGCTGGTTAG Num.seqs=4

Similarity=0.801034  
0 GGCTGGTTAGATTCGGTTCTTGCTTCTTCGTANATCCAATGAA

\*\*\*\*\*  
Consensus:

GGCTGGTTAGATTCGGTTCTTGCTTCTTCGTANATCCAATGAA

>Bacillus\_Fam\_1441\_43\_1 Nr. of seq. 1 Alignment length(with gaps) = 43  
Alignment score = 0.000000

GCF\_001742425.1\_ASM174242v1\_genomic.fna\_38:12301-12469 Satlength=169 Nr  
of Repeats=4 RepeatLength=42 seed=TCAGTTTAA Num.seqs=4  
Similarity=0.816537

0 TCAGTTTAAAGCTCGGAGACATCTGTTTTTAAGNTTAGAAACC

\*\*\*\*\*  
Consensus:

TCAGTTTAAAGCTCGGAGACATCTGTTTTTAAGNTTAGAAACC

>Bacillus\_Fam\_1442\_42\_1 Nr. of seq. 1 Alignment length(with gaps) = 42  
Alignment score = 0.000000

GCF\_000011145.1\_ASM1114v1\_genomic.fna\_1:2885595-2885763 Satlength=169 Nr  
of Repeats=4 RepeatLength=42 seed=TGATCATCTT Num.seqs=4  
Similarity=0.915344

0 TGATCATCTTCCTCGTGACCATGCTCCTCATGGCTATGGTCG

\*\*\*\*\*  
Consensus:

TGATCATCTTCCTCGTGACCATGCTCCTCATGGCTATGGTCG

>Bacillus\_Fam\_1443\_42\_1 Nr. of seq. 1 Alignment length(with gaps) = 42  
Alignment score = 0.000000

GCF\_000017425.1\_ASM1742v1\_genomic.fna\_1:1132359-1132527 Satlength=169 Nr  
of Repeats=4 RepeatLength=42 seed=AGGTTTTGT Num.seqs=4  
Similarity=0.947090

0 AGGTTTTGTGCTTCAGGTTTAGCTGTTTCGTTGTTTACAGC

\*\*\*\*\*  
Consensus:

AGGTTTTGTGCTTCAGGTTTAGCTGTTTCGTTGTTTACAGC

>Bacillus\_Fam\_1444\_42\_1 Nr. of seq. 1 Alignment length(with gaps) = 42  
Alignment score = 0.000000

GCF\_000017425.1\_ASM1742v1\_genomic.fna\_1:1831558-1831726 Satlength=169 Nr  
of Repeats=4 RepeatLength=42 seed=AATCAAGGAA Num.seqs=4  
Similarity=0.904762

0 AATCAAGGAAATCAAACGCCGCAAATAGCGGAAACGGAAT

\*\*\*\*\*  
Consensus:

AATCAAGGAAATCAAACGCCGCCAAATAGCGGAAACGGAAAT

>Bacillus\_Fam\_1445\_42\_1 Nr. of seq. 1 Alignment length(with gaps) = 42  
Alignment score = 0.000000  
GCF\_000171615.1\_ASM17161v1\_genomic.fna\_94:31227-32096 Satlength=870 Nr of  
Repeats=23 RepeatLength=42 seed=TTCTCGTGCG Num.seqs=14  
Similarity=0.651723  
0 TTCTCGTGCGGTTGCCGCTCCATCCTGTGCGGCTTTTCCCCT

\*\*\*\*\*  
Consensus:

TTCTCGTGCGGTTGCCGCTCCATCCTGTGCGGCTTTTCCCCT

>Bacillus\_Fam\_1446\_42\_1 Nr. of seq. 1 Alignment length(with gaps) = 42  
Alignment score = 0.000000  
GCF\_000177235.2\_ASM17723v2\_genomic.fna\_1:4299704-4300137 Satlength=434 Nr  
of Repeats=6 RepeatLength=42 seed=TAACTTTGAT Num.seqs=4  
Similarity=0.820106 0  
TAACTTTGATCAAATCGCTCGTAACTCGGGCCGAATCGCGCG

\*\*\*\*\*  
Consensus:

TAACTTTGATCAAATCGCTCGTAACTCGGGCCGAATCGCGCG

>Bacillus\_Fam\_1447\_42\_1 Nr. of seq. 1 Alignment length(with gaps) = 42  
Alignment score = 0.000000  
GCF\_000186125.1\_Bacillus\_BT1B\_CT2\_V1\_genomic.fna\_2:24462-24672  
Satlength=211 Nr of Repeats=5 RepeatLength=42 seed=TCTCTTTTCA Num.seqs=5  
Similarity=0.987302 0  
TCTCTTTTCAGCTCATATTCTTCCGTTTCTTCCACTTTC

\*\*\*\*\*  
Consensus:

TCTCTTTTCAGCTCATATTCTTCCGTTTCTTCCACTTTC

>Bacillus\_Fam\_1448\_42\_1 Nr. of seq. 1 Alignment length(with gaps) = 42  
Alignment score = 0.000000  
GCF\_000285535.1\_ASM28553v1\_genomic.fna\_1:1108238-1108853 Satlength=616 Nr  
of Repeats=5 RepeatLength=42 seed=CTGGACCTAT Num.seqs=4  
Similarity=0.920635 0  
CTGGACCTATGATGGGTGGGTTTAACCCTCAAGGACCTGGTG

\*\*\*\*\*  
Consensus:

CTGGACCTATGATGGGTGGGTTTAACCCTCAAGGACCTGGTG

>Bacillus\_Fam\_1449\_42\_1 Nr. of seq. 1 Alignment length(with gaps) = 42  
Alignment score = 0.000000

GCF\_000292245.2\_ASM29224v2\_genomic.fna\_35:20426-20996 Satlength=571 Nr of Repeats=4 RepeatLength=42 seed=CTTCTTCAGG Num.seqs=3 Similarity=0.936508  
0 CTTCTTCAGGAGTCTCTACTTCCTCTCCTGGTTCTTCTGTTC

\*\*\*\*\*

Consensus:

CTTCTTCAGGAGTCTCTACTTCCTCTCCTGGTTCTTCTGTTC

>Bacillus\_Fam\_1450\_42\_1 Nr. of seq. 1 Alignment length(with gaps) = 42  
Alignment score = 0.000000

GCF\_000294775.2\_ASM29477v2\_genomic.fna\_1:3171456-3171624 Satlength=169 Nr of Repeats=4 RepeatLength=42 seed=CAGCCTTTTA Num.seqs=4  
Similarity=0.894180 0

CAGCCTTTTATCCATCGAGCTGACCTTTTGATCCAGAACGTC

\*\*\*\*\*

Consensus:

CAGCCTTTTATCCATCGAGCTGACCTTTTGATCCAGAACGTC

>Bacillus\_Fam\_1451\_42\_1 Nr. of seq. 1 Alignment length(with gaps) = 42  
Alignment score = 0.000000

GCF\_000305495.1\_BacPsy2.0\_genomic.fna\_3:23376-23586 Satlength=211 Nr of Repeats=5 RepeatLength=42 seed=ATTGTTAGAG Num.seqs=5 Similarity=0.819697  
0 ATTGTTAGAGCTGCGTCGATCATTCGAACAACGACGGCGACG

\*\*\*\*\*

Consensus:

ATTGTTAGAGCTGCGTCGATCATTCGAACAACGACGGCGACG

>Bacillus\_Fam\_1452\_42\_1 Nr. of seq. 1 Alignment length(with gaps) = 42  
Alignment score = 0.000000

GCF\_000331575.1\_ASM33157v1\_genomic.fna\_1:1325868-1326120 Satlength=253 Nr of Repeats=6 RepeatLength=42 seed=TTCGCTTTCG Num.seqs=6  
Similarity=0.794709 0

TTCGCTTTCGGGTTTGCTTTTGGGTCTACCTTCGAATTTCCG

\*\*\*\*\*

Consensus:

TTCGCTTTCGGGTTTGCTTTTGGGTCTACCTTCGAATTTCCG

>Bacillus\_Fam\_1453\_42\_1 Nr. of seq. 1 Alignment length(with gaps) = 42  
Alignment score = 0.000000

GCF\_000331575.1\_ASM33157v1\_genomic.fna\_3:40144-40312 Satlength=169 Nr of Repeats=4 RepeatLength=42 seed=TCAAGAATCG Num.seqs=4 Similarity=0.931217  
0 TCAAGAATCGCGATGAAATGTCCGGTCGTACAATAGACGAGC

\*\*\*\*\*

Consensus:

TCAAGAATCGCGATGAAATGTCCGGTCGTACAATAGACGAGC

>Bacillus\_Fam\_1454\_42\_1 Nr. of seq. 1 Alignment length(with gaps) = 42  
Alignment score = 0.000000  
GCF\_000374345.1\_ASM37434v1\_genomic.fna\_4:87852-88188 Satlength=337 Nr of  
Repeats=8 RepeatLength=42 seed=TGCGTGAAGT Num.seqs=8 Similarity=0.794785  
0 TGCGTGAAGTATTGCGGTTTCTTGAAGTANAGCGGCTCTGCT

\*\*\*\*\*  
Consensus:

TGCGTGAAGTATTGCGGTTTCTTGAAGTANAGCGGCTCTGCT

>Bacillus\_Fam\_1455\_42\_1 Nr. of seq. 1 Alignment length(with gaps) = 42  
Alignment score = 0.000000  
GCF\_000374565.1\_ASM37456v1\_genomic.fna\_6:25006-25384 Satlength=379 Nr of  
Repeats=9 RepeatLength=42 seed=CAACCAAGAG Num.seqs=9 Similarity=0.970018  
0 CAACCAAGAGAAGTGGCCCCTGGAGAGGTACCTTCTGAAGCT

\*\*\*\*\*  
Consensus:

CAACCAAGAGAAGTGGCCCCTGGAGAGGTACCTTCTGAAGCT

>Bacillus\_Fam\_1456\_42\_1 Nr. of seq. 1 Alignment length(with gaps) = 42  
Alignment score = 0.000000  
GCF\_000374565.1\_ASM37456v1\_genomic.fna\_11:44641-44941 Satlength=301 Nr of  
Repeats=8 RepeatLength=42 seed=GATGATGGTG Num.seqs=6 Similarity=0.862434  
0 GATGATGGTGGCCATGCTCATGGTGATGATGCTCACGTTTCAT

\*\*\*\*\*  
Consensus:

GATGATGGTGGCCATGCTCATGGTGATGATGCTCACGTTTCAT

>Bacillus\_Fam\_1457\_42\_1 Nr. of seq. 1 Alignment length(with gaps) = 42  
Alignment score = 0.000000  
GCF\_000408885.1\_ASM40888v1\_genomic.fna\_1:3192978-3193251 Satlength=274 Nr  
of Repeats=7 RepeatLength=42 seed=AAGCGCTTGT Num.seqs=6  
Similarity=0.811640  
AAGCGCTTGTGACCTCAACGAAACGTGCGTCCACTTCATCG 0

\*\*\*\*\*  
Consensus:

AAGCGCTTGTGACCTCAACGAAACGTGCGTCCACTTCATCG

>Bacillus\_Fam\_1458\_42\_1 Nr. of seq. 1 Alignment length(with gaps) = 42  
Alignment score = 0.000000  
GCF\_000429685.1\_ASM42968v1\_genomic.fna\_11:127207-127375 Satlength=169 Nr  
of Repeats=4 RepeatLength=42 seed=TCTCCAGAGT Num.seqs=4  
Similarity=0.888889  
0 TCTCCAGAGTCATCATCGTTTCCGTCATCCGGATTTCGAATCA

\*\*\*\*\*

Consensus:

TCTCCAGAGTCATCATCGTTTCCGTCATCCGGATTCTGAATCA

>Bacillus\_Fam\_1459\_42\_1 Nr. of seq. 1 Alignment length(with gaps) = 42  
Alignment score = 0.000000  
GCF\_000429705.1\_ASM42970v1\_genomic.fna\_1:1926382-1926520 Satlength=139 Nr of  
Repeats=4 RepeatLength=42 seed=TTGTTGTTCT Num.seqs=3  
Similarity=0.830688 0  
TTGTTGTTCTGGTTGTTATTTGGATCCTGATTGTTCCATTGG

\*\*\*\*\*

Consensus:

TTGTTGTTCTGGTTGTTATTTGGATCCTGATTGTTCCATTGG

>Bacillus\_Fam\_1460\_42\_1 Nr. of seq. 1 Alignment length(with gaps) = 42  
Alignment score = 0.000000  
GCF\_000429725.1\_ASM42972v1\_genomic.fna\_9:71563-71857 Satlength=295 Nr of  
Repeats=7 RepeatLength=42 seed=CCGGCGGCGG Num.seqs=7 Similarity=0.869992  
0 CCGGCGGCGGGAACAACGGGGCTGACAATGGCGCCAACAACG

\*\*\*\*\*

Consensus:

CCGGCGGCGGGAACAACGGGGCTGACAATGGCGCCAACAACG

>Bacillus\_Fam\_1461\_42\_1 Nr. of seq. 1 Alignment length(with gaps) = 42  
Alignment score = 0.000000  
GCF\_000430785.1\_ASM43078v1\_genomic.fna\_16:70466-70970 Satlength=505 Nr of  
Repeats=4 RepeatLength=42 seed=GGAGGATCTT Num.seqs=3 Similarity=0.978836  
0 GGAGGATCTTCTCACGCGGAAGGATCGAACACAACAGCCAAT

\*\*\*\*\*

Consensus:

GGAGGATCTTCTCACGCGGAAGGATCGAACACAACAGCCAAT

>Bacillus\_Fam\_1462\_42\_1 Nr. of seq. 1 Alignment length(with gaps) = 42  
Alignment score = 0.000000  
GCF\_000430785.1\_ASM43078v1\_genomic.fna\_27:22202-22412 Satlength=211 Nr of  
Repeats=5 RepeatLength=42 seed=CTGTTCAACA Num.seqs=5 Similarity=0.917460  
0 CTGTTCAACAGCAATCAGCTCAACAAGAAAAAACTCAGCAGC

\*\*\*\*\*

Consensus:

CTGTTCAACAGCAATCAGCTCAACAAGAAAAAACTCAGCAGC

>Bacillus\_Fam\_1463\_42\_1 Nr. of seq. 1 Alignment length(with gaps) = 42  
Alignment score = 0.000000  
GCF\_000474275.1\_Bmar1.0\_genomic.fna\_50:55500-55668 Satlength=169 Nr of  
Repeats=4 RepeatLength=42 seed=TCTGCTCTTC Num.seqs=4 Similarity=0.962963  
0 TCTGCTCTTCGACTTTTATAAATCTTTCATTCTCTTATAAC

\*\*\*\*\*

Consensus:

TCTGCTCTTCGACTTTTATAAATCTTTCATTCTTCTTATAAC

>Bacillus\_Fam\_1464\_42\_1 Nr. of seq. 1 Alignment length(with gaps) = 42  
Alignment score = 0.000000

GCF\_000709935.2\_ASM70993v2\_genomic.fna\_1:258653-258947 Satlength=295 Nr of Repeats=7 RepeatLength=42 seed=CGCTCAGCTT Num.seqs=7  
Similarity=0.853364

0 CGCTCAGCTTCTTGTTTAGCAGCAGCCTGTTCTTGAGCTTTT

\*\*\*\*\*

Consensus:

CGCTCAGCTTCTTGTTTAGCAGCAGCCTGTTCTTGAGCTTTT

>Bacillus\_Fam\_1465\_42\_1 Nr. of seq. 1 Alignment length(with gaps) = 42  
Alignment score = 0.000000

GCF\_000709935.2\_ASM70993v2\_genomic.fna\_13:94783-94999 Satlength=217 Nr of Repeats=5 RepeatLength=42 seed=CAGGTGAAGG Num.seqs=4 Similarity=0.899471

0 CAGGTGAAGGAGCCGGAGAAGGCGAAGGCCAGGGCGGCGGAA

\*\*\*\*\*

Consensus:

CAGGTGAAGGAGCCGGAGAAGGCGAAGGCCAGGGCGGCGGAA

>Bacillus\_Fam\_1466\_42\_1 Nr. of seq. 1 Alignment length(with gaps) = 42  
Alignment score = 0.000000

GCF\_000712615.1\_ASM71261v1\_genomic.fna\_10:48131-48341 Satlength=211 Nr of Repeats=5 RepeatLength=42 seed=GGATTCGTAC Num.seqs=5 Similarity=0.974603

0 GGATTCGTACACCTTGTTATTTTCGTTTCCACCATTTGGT

\*\*\*\*\*

Consensus:

GGATTCGTACACCTTGTTATTTTCGTTTCCACCATTTGGT

>Bacillus\_Fam\_1467\_42\_1 Nr. of seq. 1 Alignment length(with gaps) = 42  
Alignment score = 0.000000

GCF\_000724485.1\_ASM72448v1\_genomic.fna\_1:1410335-1410587 Satlength=253 Nr of Repeats=4 RepeatLength=42 seed=AAGAACTTTC Num.seqs=3

Similarity=0.682171

AAGAACTTCTTCCTGCCAAGAAAAAGATTCTCTTGGGAAA

0

\*\*\*\*\*

Consensus:

AAGAACTTCTTCCTGCCAAGAAAAAGATTCTCTTGGGAAA

>Bacillus\_Fam\_1468\_42\_1 Nr. of seq. 1 Alignment length(with gaps) = 42  
Alignment score = 0.000000

GCF\_000724485.1\_ASM72448v1\_genomic.fna\_1:2977273-2977777 Satlength=505 Nr  
of Repeats=12 RepeatLength=42 seed=TGTTCA GTCT Num.seqs=12  
Similarity=0.831841 0  
TGTTCA GTCTTGATCGCACCGATTTCTTTCCGCATTTCTGAC

\*\*\*\*\*  
Consensus:

TGTTCA GTCTTGATCGCACCGATTTCTTTCCGCATTTCTGAC

>Bacillus\_Fam\_1469\_42\_1 Nr. of seq. 1 Alignment length(with gaps) = 42  
Alignment score = 0.000000  
GCF\_000751775.1\_A1A\_genomic.fna\_90:16-268 Satlength=253 Nr of Repeats=6  
RepeatLength=42 seed=TCAAACCGTT Num.seqs=6 Similarity=0.788360  
0 TCAAACCGTTTATCCATGCTGTTCA GACGGCCATCCACATCA

\*\*\*\*\*  
Consensus:

TCAAACCGTTTATCCATGCTGTTCA GACGGCCATCCACATCA

>Bacillus\_Fam\_1470\_42\_1 Nr. of seq. 1 Alignment length(with gaps) = 42  
Alignment score = 0.000000  
GCF\_000752395.1\_Bacillus\_andreraoultii\_genomic.fna\_31:29723-29891  
Satlength=169 Nr of Repeats=4 RepeatLength=42 seed=AGCCACTTGT Num.seqs=4  
Similarity=1.000000 0  
AGCCACTTGTAATTTATCGCTCCTTCTTTCACTGGAACGCG

\*\*\*\*\*  
Consensus:

AGCCACTTGTAATTTATCGCTCCTTCTTTCACTGGAACGCG

>Bacillus\_Fam\_1471\_42\_1 Nr. of seq. 1 Alignment length(with gaps) = 42  
Alignment score = 0.000000  
GCF\_000769555.1\_ASM76955v1\_genomic.fna\_1:2684106-2684577 Satlength=472 Nr  
of Repeats=10 RepeatLength=42 seed=GCTCTTCTTC Num.seqs=7  
Similarity=0.879063 0  
GCTCTTCTTCTTCCCCTCCCTCAGAATCGGGGCAGTCTCCG

\*\*\*\*\*  
Consensus:

GCTCTTCTTCTTCCCCTCCCTCAGAATCGGGGCAGTCTCCG

>Bacillus\_Fam\_1472\_42\_1 Nr. of seq. 1 Alignment length(with gaps) = 42  
Alignment score = 0.000000  
GCF\_000832605.1\_ASM83260v1\_genomic.fna\_2:334361-334613 Satlength=253 Nr  
of Repeats=6 RepeatLength=42 seed=GTCAAACGCA Num.seqs=6  
Similarity=0.894180  
0 GTCAAACGCAAAATGGTGGTAGCCAGCCAGGTGGAAGTGACG

\*\*\*\*\*  
Consensus:



GTCAAACGCAAAATGGTGGTAGCCAGCCAGGTGGAAGTGACG

>Bacillus\_Fam\_1473\_42\_1 Nr. of seq. 1 Alignment length(with gaps) = 42  
Alignment score = 0.000000  
GCF\_000934845.1\_ASM93484v1\_genomic.fna\_23:28230-28440 Satlength=211 Nr of  
Repeats=5 RepeatLength=42 seed=GGAGGACCGG Num.seqs=5 Similarity=0.787302  
0 GGAGGACCGGGTGGNTTTCAGGCANTCCAGGTGGNTTCCCA

\*\*\*\*\*  
Consensus:

GGAGGACCGGGTGGNTTTCAGGCANTCCAGGTGGNTTCCCA

>Bacillus\_Fam\_1474\_42\_1 Nr. of seq. 1 Alignment length(with gaps) = 42  
Alignment score = 0.000000  
GCF\_000948175.1\_BFA\_2\_A\_genomic.fna\_157:17151-17403 Satlength=253 Nr of  
Repeats=6 RepeatLength=42 seed=GATGTGGGAG Num.seqs=6 Similarity=0.908995  
0 GATGTGGGAGGCCTAAAACAAAATGTCGAAATGCTAAAAGAC

\*\*\*\*\*  
Consensus:

GATGTGGGAGGCCTAAAACAAAATGTCGAAATGCTAAAAGAC

>Bacillus\_Fam\_1475\_42\_1 Nr. of seq. 1 Alignment length(with gaps) = 42  
Alignment score = 0.000000  
GCF\_001278705.1\_ASM127870v1\_genomic.fna\_1:1934684-1934978 Satlength=295  
Nr of Repeats=7 RepeatLength=42 seed=CCTGCTACGT Num.seqs=7  
Similarity=0.918367 0  
CCTGCTACGTTTGGCTGTCCGTGATACGGATTTTCTGATGCG

\*\*\*\*\*  
Consensus:

CCTGCTACGTTTGGCTGTCCGTGATACGGATTTTCTGATGCG

>Bacillus\_Fam\_1476\_42\_1 Nr. of seq. 1 Alignment length(with gaps) = 42  
Alignment score = 0.000000  
GCF\_001278705.1\_ASM127870v1\_genomic.fna\_1:3048777-3049027 Satlength=251  
Nr of Repeats=6 RepeatLength=42 seed=GGAATTGCAC Num.seqs=4  
Similarity=0.809524 0  
GGAATTGCACCGATAACAACGATAATTGCACCGTTGACCTTG

\*\*\*\*\*  
Consensus:

GGAATTGCACCGATAACAACGATAATTGCACCGTTGACCTTG

>Bacillus\_Fam\_1477\_42\_1 Nr. of seq. 1 Alignment length(with gaps) = 42  
Alignment score = 0.000000  
GCF\_001420715.1\_ASM142071v1\_genomic.fna\_24:439598-439808 Satlength=211 Nr  
of Repeats=5 RepeatLength=42 seed=GCTTTCGTTT Num.seqs=5

Similarity=0.844444 0  
GCTTTCGTTTGTGATGCGTAGAGTATCTCGAATCTTCCTCGT

\*\*\*\*\*  
Consensus:

GCTTTCGTTTGTGATGCGTAGAGTATCTCGAATCTTCCTCGT

>Bacillus\_Fam\_1478\_42\_1 Nr. of seq. 1 Alignment length(with gaps) = 42  
Alignment score = 0.000000  
GCF\_001439635.1\_ASM143963v1\_genomic.fna\_173:188835-189045 Satlength=211  
Nr of Repeats=4 RepeatLength=42 seed=CAGGAGTCGG Num.seqs=3  
Similarity=0.873016 0  
CAGGAGTCGGACAATTAGTTGACGGACAAAAACAGCGGTTG

\*\*\*\*\*  
Consensus:

CAGGAGTCGGACAATTAGTTGACGGACAAAAACAGCGGTTG

>Bacillus\_Fam\_1479\_42\_1 Nr. of seq. 1 Alignment length(with gaps) = 42  
Alignment score = 0.000000  
GCF\_001484965.1\_ASM148496v1\_genomic.fna\_5:164270-164606 Satlength=337 Nr  
of Repeats=7 RepeatLength=42 seed=GAGCTTCAAT Num.seqs=6  
Similarity=0.928042  
0 GAGCTTCAATCCGACAAGAGGAGCGCTCATTCGGACAGGAGG

\*\*\*\*\*  
Consensus:

GAGCTTCAATCCGACAAGAGGAGCGCTCATTCGGACAGGAGG

>Bacillus\_Fam\_1480\_42\_1 Nr. of seq. 1 Alignment length(with gaps) = 42  
Alignment score = 0.000000  
GCF\_001484965.1\_ASM148496v1\_genomic.fna\_6:187378-187747 Satlength=370 Nr  
of Repeats=9 RepeatLength=42 seed=TGATCGGTAA Num.seqs=6  
Similarity=0.904762  
0 TGATCGGTAAATCCTCTGACATGAGCGATAACCATCTCTCACT

\*\*\*\*\*  
Consensus:

TGATCGGTAAATCCTCTGACATGAGCGATAACCATCTCTCACT

>Bacillus\_Fam\_1481\_42\_1 Nr. of seq. 1 Alignment length(with gaps) = 42  
Alignment score = 0.000000  
GCF\_001578185.1\_ASM157818v1\_genomic.fna\_1:1320901-1321126 Satlength=226  
Nr of Repeats=4 RepeatLength=42 seed=ATTTCTGCTA Num.seqs=3  
Similarity=0.894180 0  
ATTTCTGCTAGTGC GCCTTTGGTTTCTGCATGTAGATCTCCG

\*\*\*\*\*  
Consensus:

ATTTCTGCTAGTGC GCCTTTGGTTTCTGCATGTAGATCTCCG

>Bacillus\_Fam\_1482\_42\_1 Nr. of seq. 1 Alignment length(with gaps) = 42  
Alignment score = 0.000000  
GCF\_001587375.1\_ASM158737v1\_genomic.fna\_134:11775-12027 Satlength=253 Nr  
of Repeats=6 RepeatLength=42 seed=TTGAAGTCGA Num.seqs=6  
Similarity=0.936508  
0 TTGAAGTCGACAAACGGTTTGATGCTGTTGATCAAAAATTTA

\*\*\*\*\*  
Consensus:

TTGAAGTCGACAAACGGTTTGATGCTGTTGATCAAAAATTTA

>Bacillus\_Fam\_1483\_42\_1 Nr. of seq. 1 Alignment length(with gaps) = 42  
Alignment score = 0.000000  
GCF\_001591425.1\_ASM159142v1\_genomic.fna\_25:20219-20387 Satlength=169 Nr  
of Repeats=4 RepeatLength=42 seed=TTATTTAACA Num.seqs=4  
Similarity=0.941799  
0 TTATTTAACAGGTAGCAGAATTAACATAACAGAGTTTCGATT

\*\*\*\*\*  
Consensus:

TTATTTAACAGGTAGCAGAATTAACATAACAGAGTTTCGATT

>Bacillus\_Fam\_1484\_42\_1 Nr. of seq. 1 Alignment length(with gaps) = 42  
Alignment score = 0.000000  
GCF\_001591425.1\_ASM159142v1\_genomic.fna\_72:22227-22647 Satlength=421 Nr  
of Repeats=10 RepeatLength=42 seed=GTTGGCCGAT Num.seqs=10  
Similarity=0.779189  
GTTGGCCGATATATCGATTGTGGTGGCGCAATAACATGCTCA

0

\*\*\*\*\*  
Consensus:

GTTGGCCGATATATCGATTGTGGTGGCGCAATAACATGCTCA

>Bacillus\_Fam\_1485\_42\_1 Nr. of seq. 1 Alignment length(with gaps) = 42  
Alignment score = 0.000000  
GCF\_001591425.1\_ASM159142v1\_genomic.fna\_137:8995-9163 Satlength=169 Nr of  
Repeats=4 RepeatLength=42 seed=AAGTGCGTCA Num.seqs=4 Similarity=0.822997  
0 AAGTGCGTCAATTACTTATCCAGCTGCGTCAAAAAGTTCGCC

\*\*\*\*\*  
Consensus:

AAGTGCGTCAATTACTTATCCAGCTGCGTCAAAAAGTTCGCC

>Bacillus\_Fam\_1486\_42\_1 Nr. of seq. 1 Alignment length(with gaps) = 42  
Alignment score = 0.000000  
GCF\_001591445.1\_ASM159144v1\_genomic.fna\_22:81979-82189 Satlength=211 Nr  
of Repeats=5 RepeatLength=42 seed=TTTGATAAAA Num.seqs=3

Similarity=0.957672

0 TTTGATAAAATTGAAACTCGACTTAATAATATGGATCAGCGG

\*\*\*\*\*

Consensus:

TTTGATAAAATTGAAACTCGACTTAATAATATGGATCAGCGG

>Bacillus\_Fam\_1487\_42\_1 Nr. of seq. 1 Alignment length(with gaps) = 42

Alignment score = 0.000000

GCF\_001591585.1\_ASM159158v1\_genomic.fna\_13:66350-66497 Satlength=148 Nr

of Repeats=4 RepeatLength=42 seed=AGAAACGCCA Num.seqs=3

Similarity=0.809524

0 AGAAACGCCAGGAGATAACGAAGAACTCCTGGAGATAATGA

\*\*\*\*\*

Consensus:

AGAAACGCCAGGAGATAACGAAGAACTCCTGGAGATAATGA

>Bacillus\_Fam\_1488\_42\_1 Nr. of seq. 1 Alignment length(with gaps) = 42

Alignment score = 0.000000

GCF\_001591665.1\_ASM159166v1\_genomic.fna\_15:56816-56984 Satlength=169 Nr

of Repeats=5 RepeatLength=42 seed=GCGAATTTCC Num.seqs=3

Similarity=0.542929

0 GCGAATTTCCGNGCCCAATGNGCGAATTATCGNACCTTACTN

\*\*\*\*\*

Consensus:

GCGAATTTCCGNGCCCAATGNGCGAATTATCGNACCTTACTN

>Bacillus\_Fam\_1489\_42\_1 Nr. of seq. 1 Alignment length(with gaps) = 42

Alignment score = 0.000000

GCF\_001592005.1\_ASM159200v1\_genomic.fna\_21:10147-10315 Satlength=169 Nr

of Repeats=4 RepeatLength=42 seed=GTGATCATTC Num.seqs=4

Similarity=0.915344

0 GTGATCATTCGCGCGCGGTTTGAAAATCATTGGTTGATGAC

\*\*\*\*\*

Consensus:

GTGATCATTCGCGCGCGGTTTGAAAATCATTGGTTGATGAC

>Bacillus\_Fam\_1490\_42\_1 Nr. of seq. 1 Alignment length(with gaps) = 42

Alignment score = 0.000000

GCF\_001636335.1\_ASM163633v1\_genomic.fna\_1:2763111-2763578 Satlength=468

Nr of Repeats=7 RepeatLength=42 seed=TATTCGCCGT Num.seqs=5

Similarity=0.638636

TATTCGCCGTCTNCTCNATTTATTGGACATTANCNGCACTT

0

\*\*\*\*\*

Consensus:

TATTCGCCGTTCTNCTCNATTTATTGGACATTANCNGCACTT

>Bacillus\_Fam\_1491\_42\_1 Nr. of seq. 1 Alignment length(with gaps) = 42  
Alignment score = 0.000000  
GCF\_001636425.1\_ASM163642v1\_genomic.fna\_1:2163616-2163826 Satlength=211  
Nr of Repeats=5 RepeatLength=42 seed=ACATATCTAT Num.seqs=5  
Similarity=0.923810 0  
ACATATCTATGCTGATAAAAGGCAATTACCCCTTTAAGTAG

\*\*\*\*\*  
Consensus:

ACATATCTATGCTGATAAAAGGCAATTACCCCTTTAAGTAG

>Bacillus\_Fam\_1492\_42\_1 Nr. of seq. 1 Alignment length(with gaps) = 42  
Alignment score = 0.000000  
GCF\_001645685.2\_ASM164568v2\_genomic.fna\_1:3182234-3182381 Satlength=148  
Nr of Repeats=4 RepeatLength=42 seed=CTCGCCAATT Num.seqs=3  
Similarity=0.772727 0  
CTCGCCAATTCGGCACTTTTACTCGCGAGTTTCTGCTGTTTA

\*\*\*\*\*  
Consensus:

CTCGCCAATTCGGCACTTTTACTCGCGAGTTTCTGCTGTTTA

>Bacillus\_Fam\_1493\_42\_1 Nr. of seq. 1 Alignment length(with gaps) = 42  
Alignment score = 0.000000  
GCF\_001645685.2\_ASM164568v2\_genomic.fna\_1:3510154-3511004 Satlength=851  
Nr of Repeats=19 RepeatLength=42 seed=TTTTTCGGCC Num.seqs=12  
Similarity=0.854738 18  
TTTCGACCTGCATCCACTTTTTTTTCGGCCTGCACTCAACTTAA

\*\*\*\*\*  
Consensus:

TTTTTCGGCCTGCACTCAACTTAATTCGACCTGCATCCACTT

>Bacillus\_Fam\_1494\_42\_1 Nr. of seq. 1 Alignment length(with gaps) = 42  
Alignment score = 0.000000  
GCF\_001645705.1\_ASM164570v1\_genomic.fna\_60:510572-511860 Satlength=1289  
Nr of Repeats=31 RepeatLength=42 seed=GTTGCGCAAT Num.seqs=25  
Similarity=0.780465 0  
GTTGCGCAATANGGTANTGTTTTAGCGCAATTCCGTGTGNAA

\*\*\*\*\*  
Consensus:

GTTGCGCAATANGGTANTGTTTTAGCGCAATTCCGTGTGNAA

>Bacillus\_Fam\_1495\_42\_1 Nr. of seq. 1 Alignment length(with gaps) = 42  
Alignment score = 0.000000

GCF\_001654695.1\_ASM165469v1\_genomic.fna\_17:33252-33504 Satlength=253 Nr of Repeats=6 RepeatLength=42 seed=TCGTAGCATT Num.seqs=6 Similarity=0.881481

0 TCGTAGCATTTTTTCTTCTTACAGCAAAAATCTACGTGATCG

\*\*\*\*\*

Consensus:

TCGTAGCATTTTTTCTTCTTACAGCAAAAATCTACGTGATCG

>Bacillus\_Fam\_1496\_42\_1 Nr. of seq. 1 Alignment length(with gaps) = 42 Alignment score = 0.000000

GCF\_001712755.1\_ASM171275v1\_genomic.fna\_35:220736-221801 Satlength=1066 Nr of Repeats=19 RepeatLength=42 seed=TTTGGTCCCA Num.seqs=16

Similarity=0.741534 0

TTTGGTCCCATATATGCTGGCATTGTTTGTGGGAAGTTTGCA

\*\*\*\*\*

Consensus:

TTTGGTCCCATATATGCTGGCATTGTTTGTGGGAAGTTTGCA

>Bacillus\_Fam\_1497\_42\_1 Nr. of seq. 1 Alignment length(with gaps) = 42 Alignment score = 0.000000

GCF\_001742425.1\_ASM174242v1\_genomic.fna\_13:64716-64926 Satlength=211 Nr of Repeats=5 RepeatLength=42 seed=GAAGTAGAAG Num.seqs=5

Similarity=0.761905

0 GAAGTAGAAGATCTAAAAGCAGGTCAAACGAAGTTAACAACG

\*\*\*\*\*

Consensus:

GAAGTAGAAGATCTAAAAGCAGGTCAAACGAAGTTAACAACG

>Bacillus\_Fam\_1498\_42\_1 Nr. of seq. 1 Alignment length(with gaps) = 42 Alignment score = 0.000000

GCF\_001742425.1\_ASM174242v1\_genomic.fna\_37:154-322 Satlength=169 Nr of Repeats=4 RepeatLength=42 seed=TTCTTCTTCA Num.seqs=4 Similarity=0.874031

0 TTCTTCTTCAGCAACGGTGTTAACTTCATCCTCAGGAAGGTA

\*\*\*\*\*

Consensus:

TTCTTCTTCAGCAACGGTGTTAACTTCATCCTCAGGAAGGTA

>Bacillus\_Fam\_1499\_42\_1 Nr. of seq. 1 Alignment length(with gaps) = 42 Alignment score = 0.000000

GCF\_001877785.1\_PlanoSAMM\_genomic.fna\_72:16191-16527 Satlength=337 Nr of Repeats=8 RepeatLength=42 seed=TACTTACTTG Num.seqs=8 Similarity=0.969388

0 TACTTACTTGTTGACCATTCTCCACTCTTCCAAACGTTCGT

\*\*\*\*\*

Consensus:

TACTTACTTGTGACCATCTCCACTCTTTCCAAACGTTTCGT

>Bacillus\_Fam\_1500\_42\_1 Nr. of seq. 1 Alignment length(with gaps) = 42  
Alignment score = 0.000000  
GCF\_002019635.1\_ASM201963v1\_genomic.fna\_1:836663-836873 Satlength=211 Nr  
of Repeats=5 RepeatLength=42 seed=AGTTCTTTTCG Num.seqs=5  
Similarity=0.898413  
0 AGTTCTTTTCGTGTCTGCTTTTAATAGCCGGACGTCTCCTTTT

\*\*\*\*\*  
Consensus:

AGTTCTTTTCGTGTCTGCTTTTAATAGCCGGACGTCTCCTTTT

>Bacillus\_Fam\_1501\_42\_1 Nr. of seq. 1 Alignment length(with gaps) = 42  
Alignment score = 0.000000  
GCF\_002019665.1\_ASM201966v1\_genomic.fna\_1:2650891-2651059 Satlength=169  
Nr of Repeats=4 RepeatLength=42 seed=GTCACCTACA Num.seqs=4  
Similarity=0.873016  
GTCACCTACATTGGTTTTCAATTCACCAACATCGGTTGTCAG

\*\*\*\*\*  
Consensus:

GTCACCTACATTGGTTTTCAATTCACCAACATCGGTTGTCAG

>Bacillus\_Fam\_1502\_42\_1 Nr. of seq. 1 Alignment length(with gaps) = 42  
Alignment score = 0.000000  
GCF\_900103955.1\_IMG-  
taxon\_2617270767\_annotated\_assembly\_genomic.fna\_4:117-426 Satlength=310  
Nr of Repeats=4 RepeatLength=42 seed=TTTACTCCGA Num.seqs=3  
Similarity=0.788360  
TTTACTCCGATCCTCTTATACTTTACTAACAACCACCTATAC

\*\*\*\*\*  
Consensus:

TTTACTCCGATCCTCTTATACTTTACTAACAACCACCTATAC

>Bacillus\_Fam\_1503\_42\_1 Nr. of seq. 1 Alignment length(with gaps) = 42  
Alignment score = 0.000000  
GCF\_900104555.1\_IMG-  
taxon\_2651870172\_annotated\_assembly\_genomic.fna\_22:838320-838572  
Satlength=253 Nr of Repeats=6 RepeatLength=42 seed=GCTACTGAAG Num.seqs=6  
Similarity=0.904762  
GCTACTGAAGACACTCATTCTCATGACGATGAAGAGAGTCAT

\*\*\*\*\*  
Consensus:

GCTACTGAAGACACTCATTCTCATGACGATGAAGAGAGTCAT

>Bacillus\_Fam\_1504\_42\_1 Nr. of seq. 1 Alignment length(with gaps) = 42  
Alignment score = 0.000000  
GCF\_900107275.1\_IMG-  
taxon\_2675903024\_annotated\_assembly\_genomic.fna\_12:79980-80484  
Satlength=505 Nr of Repeats=12 RepeatLength=42 seed=CGGAAGACGG  
Num.seqs=12 Similarity=0.923040 0  
CGGAAGACGGGGAGAACGCCGAAGGAGAAGCGCCAAGTCCGC

\*\*\*\*\*

Consensus:

CGGAAGACGGGGAGAACGCCGAAGGAGAAGCGCCAAGTCCGC

>Bacillus\_Fam\_1505\_42\_1 Nr. of seq. 1 Alignment length(with gaps) = 42  
Alignment score = 0.000000  
GCF\_900107275.1\_IMG-  
taxon\_2675903024\_annotated\_assembly\_genomic.fna\_35:69303-69513  
Satlength=211 Nr of Repeats=5 RepeatLength=42 seed=AGAGCAGTGC Num.seqs=5  
Similarity=0.923810 0  
AGAGCAGTGCACAGCGCTGCGTCGTGCGAAGCACAAAAAAG

\*\*\*\*\*

Consensus:

AGAGCAGTGCACAGCGCTGCGTCGTGCGAAGCACAAAAAAG

>Bacillus\_Fam\_1506\_42\_1 Nr. of seq. 1 Alignment length(with gaps) = 42  
Alignment score = 0.000000  
GCF\_900107275.1\_IMG-  
taxon\_2675903024\_annotated\_assembly\_genomic.fna\_42:1093335-1093503  
Satlength=169 Nr of Repeats=4 RepeatLength=42 seed=GCCGAATCCT Num.seqs=4  
Similarity=0.925926 0  
GCCGAATCCTGGAGTCGCATACGGAGAACTGGACGAACACG

\*\*\*\*\*

Consensus:

GCCGAATCCTGGAGTCGCATACGGAGAACTGGACGAACACG

>Bacillus\_Fam\_1507\_42\_1 Nr. of seq. 1 Alignment length(with gaps) = 42  
Alignment score = 0.000000  
GCF\_900111815.1\_PRJEB17078\_genomic.fna\_1:571953-572162 Satlength=210 Nr  
of Repeats=5 RepeatLength=42 seed=ATCAGCCAAC Num.seqs=4  
Similarity=0.968254  
0 ATCAGCCAACCTTCGGGCGAGAATCAACCAAGCTTGGCGAAAA

\*\*\*\*\*

Consensus:

ATCAGCCAACCTTCGGGCGAGAATCAACCAAGCTTGGCGAAAA

>Bacillus\_Fam\_1508\_42\_1 Nr. of seq. 1 Alignment length(with gaps) = 42  
Alignment score = 0.000000



GCF\_900142675.1\_IMG-  
taxon\_2654588196\_annotated\_assembly\_genomic.fna\_9:331825-331993  
Satlength=169 Nr of Repeats=4 RepeatLength=42 seed=GAAAAGCGTT Num.seqs=4  
Similarity=0.931217 0  
GAAAAGCGTTTTGACGGTTTAGAAGGGCGTATTGATGGGCTA

\*\*\*\*\*  
Consensus:

GAAAAGCGTTTTGACGGTTTAGAAGGGCGTATTGATGGGCTA

>Bacillus\_Fam\_1509\_41\_1 Nr. of seq. 1 Alignment length(with gaps) = 41  
Alignment score = 0.000000  
GCF\_000285535.1\_ASM28553v1\_genomic.fna\_2:783130-783602 Satlength=473 Nr  
of Repeats=11 RepeatLength=41 seed=TTTGCCTCTT Num.seqs=9  
Similarity=0.820106  
0 TTTGCCTCTTCTGATGAGNGATTTGCACCGGTTTGGTGGCA

\*\*\*\*\*  
Consensus:

TTTGCCTCTTCTGATGAGNGATTTGCACCGGTTTGGTGGCA

>Bacillus\_Fam\_1510\_41\_1 Nr. of seq. 1 Alignment length(with gaps) = 41  
Alignment score = 0.000000  
GCF\_000331575.1\_ASM33157v1\_genomic.fna\_1:1704740-1704945 Satlength=206 Nr  
of Repeats=4 RepeatLength=41 seed=AATATTGGAA Num.seqs=3  
Similarity=0.869919 0  
AATATTGGAATTTGCTTCTGAAAATTTAGGGTTAGTTCCC

\*\*\*\*\*  
Consensus:

AATATTGGAATTTGCTTCTGAAAATTTAGGGTTAGTTCCC

>Bacillus\_Fam\_1511\_41\_1 Nr. of seq. 1 Alignment length(with gaps) = 41  
Alignment score = 0.000000  
GCF\_000374565.1\_ASM37456v1\_genomic.fna\_7:121779-122039 Satlength=261 Nr  
of Repeats=6 RepeatLength=40 seed=TATACGAGAG Num.seqs=4  
Similarity=0.794038  
0 TATACGAGAGGTGGAGCTGCTATAAGTGAGTGGCACCTGTC

\*\*\*\*\*  
Consensus:

TATACGAGAGGTGGAGCTGCTATAAGTGAGTGGCACCTGTC

>Bacillus\_Fam\_1512\_41\_1 Nr. of seq. 1 Alignment length(with gaps) = 41  
Alignment score = 0.000000  
GCF\_000401235.1\_BacNeaAAU1\_genomic.fna\_215:29479-29643 Satlength=165 Nr  
of Repeats=4 RepeatLength=41 seed=GATTTATCAG Num.seqs=4  
Similarity=0.934959  
0 GATTTATCAGCCAAAACCTCACTCTTTTCAGCCAAAACCTCC

\*\*\*\*\*

Consensus:

GATTTATCAGCCAAAACTCACTCTTTTCAGCCAACTTCC

>Bacillus\_Fam\_1513\_41\_1 Nr. of seq. 1 Alignment length(with gaps) = 41  
Alignment score = 0.000000

GCF\_000429705.1\_ASM42970v1\_genomic.fna\_2:114683-114847 Satlength=165 Nr  
of Repeats=5 RepeatLength=41 seed=TCGATCGATA Num.seqs=3  
Similarity=0.956640

0 TCGATCGATAAATCTCAAAGTCGATGAATAAACCAGGCAAC

\*\*\*\*\*

Consensus:

TCGATCGATAAATCTCAAAGTCGATGAATAAACCAGGCAAC

>Bacillus\_Fam\_1514\_41\_1 Nr. of seq. 1 Alignment length(with gaps) = 41  
Alignment score = 0.000000

GCF\_000429705.1\_ASM42970v1\_genomic.fna\_6:23293-23457 Satlength=165 Nr of  
Repeats=4 RepeatLength=41 seed=TTTATCAATC Num.seqs=4 Similarity=0.853659

0 TTTATCAATCACTTTCCCCTCGTTATCCATCACTTTCACAA

\*\*\*\*\*

Consensus:

TTTATCAATCACTTTCCCCTCGTTATCCATCACTTTCACAA

>Bacillus\_Fam\_1515\_41\_1 Nr. of seq. 1 Alignment length(with gaps) = 41  
Alignment score = 0.000000

GCF\_000429725.1\_ASM42972v1\_genomic.fna\_2:355518-356110 Satlength=593 Nr  
of Repeats=5 RepeatLength=41 seed=TGGACAATTC Num.seqs=3  
Similarity=0.869919

0 TGGACAATTCGGCGGGATTGTGACCAAGCGGCGGCAAGTC

\*\*\*\*\*

Consensus:

TGGACAATTCGGCGGGATTGTGACCAAGCGGCGGCAAGTC

>Bacillus\_Fam\_1516\_41\_1 Nr. of seq. 1 Alignment length(with gaps) = 41  
Alignment score = 0.000000

GCF\_000504145.1\_SOAPdenovo\_for\_version2.04\_of\_Bacillus\_sp.\_FJAT-  
14515\_genome\_genomic.fna\_1:2086005-2086495 Satlength=491 Nr of Repeats=12  
RepeatLength=41 seed=TTGCGGGCCG Num.seqs=10 Similarity=0.9407 0  
TTGCGGGCCGACCTAACCCTTTACATGCCGATTTCTTATA

\*\*\*\*\*

Consensus:

TTGCGGGCCGACCTAACCCTTTACATGCCGATTTCTTATA

>Bacillus\_Fam\_1517\_41\_1 Nr. of seq. 1 Alignment length(with gaps) = 41  
Alignment score = 0.000000  
GCF\_000504145.1\_SOAPdenovo\_for\_version2.04\_of\_Bacillus\_sp.\_FJAT-  
14515\_genome\_genomic.fna\_1:2113011-2113379 Satlength=369 Nr of Repeats=9  
RepeatLength=41 seed=CACTTTTCAC Num.seqs=8 Similarity=0.907085 0  
CACTTTTCACACCAAATCGAAGTTTGCGGGCCGGTTCAAA

\*\*\*\*\*  
Consensus:

CACTTTTCACACCAAATCGAAGTTTGCGGGCCGGTTCAAA

>Bacillus\_Fam\_1518\_41\_1 Nr. of seq. 1 Alignment length(with gaps) = 41  
Alignment score = 0.000000  
GCF\_000712595.1\_ASM71259v1\_genomic.fna\_1:175979-176594 Satlength=616 Nr  
of Repeats=15 RepeatLength=41 seed=AAAAAGTGAC Num.seqs=15  
Similarity=0.995664 0  
AAAAAGTGACCGCATTATCACCTGTTTTGACTGAATAAACG

\*\*\*\*\*  
Consensus:

AAAAAGTGACCGCATTATCACCTGTTTTGACTGAATAAACG

>Bacillus\_Fam\_1519\_41\_1 Nr. of seq. 1 Alignment length(with gaps) = 41  
Alignment score = 0.000000  
GCF\_001273755.1\_ASM127375v1\_genomic.fna\_17:206866-207071 Satlength=206 Nr  
of Repeats=5 RepeatLength=41 seed=AATTCGTCCCT Num.seqs=5  
Similarity=0.752381 0  
AATTCGTCCCTACATGGNAANAATTCGACCGTAACCGGCAAN

\*\*\*\*\*  
Consensus:

AATTCGTCCCTACATGGNAANAATTCGACCGTAACCGGCAAN

>Bacillus\_Fam\_1520\_41\_1 Nr. of seq. 1 Alignment length(with gaps) = 41  
Alignment score = 0.000000  
GCF\_001273755.1\_ASM127375v1\_genomic.fna\_17:3549779-3549982 Satlength=204  
Nr of Repeats=5 RepeatLength=41 seed=CTGAAGGTCTG Num.seqs=3  
Similarity=0.913279 0  
CTGAAGGTCTGATTTATTCCGACCCACGGACGAATTCATTCA

\*\*\*\*\*  
Consensus:

CTGAAGGTCTGATTTATTCCGACCCACGGACGAATTCATTCA

>Bacillus\_Fam\_1521\_41\_1 Nr. of seq. 1 Alignment length(with gaps) = 41  
Alignment score = 0.000000  
GCF\_001636325.1\_ASM163632v1\_genomic.fna\_1:591647-591811 Satlength=165 Nr  
of Repeats=4 RepeatLength=41 seed=GAGACGCAAA Num.seqs=4  
Similarity=0.967480  
0 GAGACGCAAAAGTAGTTGCAGCTTACGCAAAAAACAGTGGA

\*\*\*\*\*

Consensus:

GAGACGCAAAAGTAGTTGCAGCTTACGCAAAAACAGTGGA

>Bacillus\_Fam\_1522\_41\_1 Nr. of seq. 1 Alignment length(with gaps) = 41  
Alignment score = 0.000000  
GCF\_001636325.1\_ASM163632v1\_genomic.fna\_3:885452-885657 Satlength=206 Nr  
of Repeats=5 RepeatLength=41 seed=TAAATATTTG Num.seqs=5  
Similarity=0.930159  
0 TAAATATTTGCGTCAGCCTCAGTGATTTAAGCGTCACCATT

\*\*\*\*\*

Consensus:

TAAATATTTGCGTCAGCCTCAGTGATTTAAGCGTCACCATT

>Bacillus\_Fam\_1523\_41\_1 Nr. of seq. 1 Alignment length(with gaps) = 41  
Alignment score = 0.000000  
GCF\_001636335.1\_ASM163633v1\_genomic.fna\_2:321955-322365 Satlength=411 Nr  
of Repeats=10 RepeatLength=41 seed=TGCATATATT Num.seqs=10  
Similarity=0.947245 0  
TGCATATATTGCGCGTCCTCAAGCAGATATTGGACAAAACC

\*\*\*\*\*

Consensus:

TGCATATATTGCGCGTCCTCAAGCAGATATTGGACAAAACC

>Bacillus\_Fam\_1524\_41\_1 Nr. of seq. 1 Alignment length(with gaps) = 41  
Alignment score = 0.000000  
GCF\_001645685.2\_ASM164568v2\_genomic.fna\_1:1284454-1284618 Satlength=165  
Nr of Repeats=4 RepeatLength=41 seed=AGGGAAGCAG Num.seqs=4  
Similarity=0.983740 0  
AGGGAAGCAGGACGAATAAATTCGCGGACGGACGGAAAAAG

\*\*\*\*\*

Consensus:

AGGGAAGCAGGACGAATAAATTCGCGGACGGACGGAAAAAG

>Bacillus\_Fam\_1525\_41\_1 Nr. of seq. 1 Alignment length(with gaps) = 41  
Alignment score = 0.000000  
GCF\_001645685.2\_ASM164568v2\_genomic.fna\_1:3245887-3246338 Satlength=452  
Nr of Repeats=13 RepeatLength=41 seed=GGACGAATTC Num.seqs=9  
Similarity=0.881662 0  
GGACGAATTCCTCTCGACGGTAGGTCTGAATTAAACCTGTTTG

\*\*\*\*\*

Consensus:

GGACGAATTCCTCTCGACGGTAGGTCTGAATTAAACCTGTTTG

>Bacillus\_Fam\_1526\_41\_1 Nr. of seq. 1 Alignment length(with gaps) = 41  
Alignment score = 0.000000  
GCF\_001645685.2\_ASM164568v2\_genomic.fna\_1:3591693-3592229 Satlength=537  
Nr of Repeats=13 RepeatLength=41 seed=GGACGGATTA Num.seqs=10  
Similarity=0.819332 0  
GGACGGATTATTTTCATCCCAGGTCGGATTCCACGCGCTGTC

\*\*\*\*\*  
Consensus:

GGACGGATTATTTTCATCCCAGGTCGGATTCCACGCGCTGTC

>Bacillus\_Fam\_1527\_41\_1 Nr. of seq. 1 Alignment length(with gaps) = 41  
Alignment score = 0.000000  
GCF\_001645685.2\_ASM164568v2\_genomic.fna\_1:3945848-3946297 Satlength=450  
Nr of Repeats=11 RepeatLength=41 seed=TTCGACCTAA Num.seqs=7  
Similarity=0.724622 0  
TTCGACCTAAACTCCATTTTTTTCCGGCCCACTATCGATTAA

\*\*\*\*\*  
Consensus:

TTCGACCTAAACTCCATTTTTTTCCGGCCCACTATCGATTAA

>Bacillus\_Fam\_1528\_41\_1 Nr. of seq. 1 Alignment length(with gaps) = 41  
Alignment score = 0.000000  
GCF\_001645685.2\_ASM164568v2\_genomic.fna\_1:4091702-4091905 Satlength=204  
Nr of Repeats=5 RepeatLength=41 seed=GATATAATTC Num.seqs=3  
Similarity=0.738095 0  
GATATAATTCAGTTTCGGCGATATATTGCCGGTTTTTCGTA

\*\*\*\*\*  
Consensus:

GATATAATTCAGTTTCGGCGATATATTGCCGGTTTTTCGTA

>Bacillus\_Fam\_1529\_41\_1 Nr. of seq. 1 Alignment length(with gaps) = 41  
Alignment score = 0.000000  
GCF\_001645685.2\_ASM164568v2\_genomic.fna\_1:4831063-4831779 Satlength=717  
Nr of Repeats=18 RepeatLength=41 seed=ATATTCCGGC Num.seqs=15  
Similarity=0.847309 0  
ATATTCCGGCCTTACCCGCTGGTTTCCGGCCTGCTTCATCG

\*\*\*\*\*  
Consensus:

ATATTCCGGCCTTACCCGCTGGTTTCCGGCCTGCTTCATCG

>Bacillus\_Fam\_1530\_41\_1 Nr. of seq. 1 Alignment length(with gaps) = 41  
Alignment score = 0.000000  
GCF\_001645685.2\_ASM164568v2\_genomic.fna\_1:4869499-4869784 Satlength=286  
Nr of Repeats=7 RepeatLength=41 seed=ATTGGGTCGA Num.seqs=5  
Similarity=0.834146 0  
ATTGGGTCGATTATCTCCTGTTAGGACGATTTATCCCCGC

\*\*\*\*\*

Consensus:

ATTGGGTCGATTTATCTCCTGTTAGGACGATTTATCCCCGC

>Bacillus\_Fam\_1531\_41\_1 Nr. of seq. 1 Alignment length(with gaps) = 41  
Alignment score = 0.000000  
GCF\_001645705.1\_ASM164570v1\_genomic.fna\_57:5429-5921 Satlength=493 Nr of  
Repeats=12 RepeatLength=41 seed=GTAAGGAAGT Num.seqs=12  
Similarity=0.907366  
0 GTAAGGAAGTCGCGCAATCCCCAGGAAAGAAGCGCAATGCA

\*\*\*\*\*

Consensus:

GTAAGGAAGTCGCGCAATCCCCAGGAAAGAAGCGCAATGCA

>Bacillus\_Fam\_1532\_41\_1 Nr. of seq. 1 Alignment length(with gaps) = 41  
Alignment score = 0.000000  
GCF\_001648575.1\_ASM164857v1\_genomic.fna\_3:67197-67361 Satlength=165 Nr of  
Repeats=4 RepeatLength=41 seed=AAAAGTAGCG Num.seqs=4 Similarity=0.902439  
0 AAAAGTAGCGGATAAAACCCAAAAGTTGTTGGATAAATCCC

\*\*\*\*\*

Consensus:

AAAAGTAGCGGATAAAACCCAAAAGTTGTTGGATAAATCCC

>Bacillus\_Fam\_1533\_41\_1 Nr. of seq. 1 Alignment length(with gaps) = 41  
Alignment score = 0.000000  
GCF\_002019645.1\_ASM201964v1\_genomic.fna\_1:1580930-1581300 Satlength=371  
Nr of Repeats=5 RepeatLength=41 seed=TTCTCGTGCT Num.seqs=4  
Similarity=1.000000  
TTCTCGTGCTTCAAATGGAAGCATGAGAACCGTCCCACTGC

0

\*\*\*\*\*

Consensus:

TTCTCGTGCTTCAAATGGAAGCATGAGAACCGTCCCACTGC

>Bacillus\_Fam\_1534\_40\_1 Nr. of seq. 1 Alignment length(with gaps) = 40  
Alignment score = 0.000000  
BACILLUS\_PSEUDALCALIPHILUS\_genomic.fna\_3:56177-56333 Satlength=157 Nr of  
Repeats=4 RepeatLength=39 seed=CATGAAGAAG Num.seqs=4 Similarity=0.905556  
0 CATGAAGAAGACGAACATGAGCATCACGAGCATGAGGGGC

\*\*\*\*\*

Consensus:

CATGAAGAAGACGAACATGAGCATCACGAGCATGAGGGGC

>Bacillus\_Fam\_1535\_40\_1 Nr. of seq. 1 Alignment length(with gaps) = 40  
Alignment score = 0.000000

GCF\_000285535.1\_ASM28553v1\_genomic.fna\_3:14224-14505 Satlength=282 Nr of Repeats=7 RepeatLength=40 seed=GATTTGCGTC Num.seqs=6 Similarity=0.797778  
0 GATTTGCGTCTGCATTTTCGTTTTTTGCGTCGCACCCGGCA

\*\*\*\*\*

Consensus:

GATTTGCGTCTGCATTTTCGTTTTTTGCGTCGCACCCGGCA

>Bacillus\_Fam\_1536\_40\_1 Nr. of seq. 1 Alignment length(with gaps) = 40  
Alignment score = 0.000000

GCF\_000429705.1\_ASM42970v1\_genomic.fna\_1:1910664-1910961 Satlength=298 Nr of Repeats=6 RepeatLength=40 seed=ATCCACTTAT Num.seqs=5  
Similarity=0.883333

0

ATCCACTTATTTTAACTTTGTCCGAGTTATTGGCAGATTG

\*\*\*\*\*

Consensus:

ATCCACTTATTTTAACTTTGTCCGAGTTATTGGCAGATTG

>Bacillus\_Fam\_1537\_40\_1 Nr. of seq. 1 Alignment length(with gaps) = 40  
Alignment score = 0.000000

GCF\_001439915.1\_ASM143991v1\_genomic.fna\_83:95603-96081 Satlength=479 Nr of Repeats=12 RepeatLength=40 seed=ACGCATAAAT Num.seqs=8  
Similarity=0.858333

0 ACGCATAAATCCTGGAACCGATGCAAATAACTTGGATCCG

\*\*\*\*\*

Consensus:

ACGCATAAATCCTGGAACCGATGCAAATAACTTGGATCCG

>Bacillus\_Fam\_1538\_40\_1 Nr. of seq. 1 Alignment length(with gaps) = 40  
Alignment score = 0.000000

GCF\_001712755.1\_ASM171275v1\_genomic.fna\_36:70380-70659 Satlength=280 Nr of Repeats=7 RepeatLength=40 seed=ATTTTAAATT Num.seqs=6  
Similarity=0.922222

0 ATTTTAAATTGCGATTACACGAATTTATTTGCCATTTCCC

\*\*\*\*\*

Consensus:

ATTTTAAATTGCGATTACACGAATTTATTTGCCATTTCCC

>Bacillus\_Fam\_1539\_39\_1 Nr. of seq. 1 Alignment length(with gaps) = 39  
Alignment score = 0.000000

GCF\_000008505.1\_ASM850v1\_genomic.fna\_1:2312216-2312489 Satlength=274 Nr of Repeats=7 RepeatLength=39 seed=TTATCTTAG Num.seqs=7  
Similarity=0.960928

0 TTATCTTAGATTTCCACCAATCGTCATCACAATTGTGC

\*\*\*\*\*

Consensus:

TTATCTTTAGATTTCCACCAATCGTCATCACAATTGTGC

>Bacillus\_Fam\_1540\_39\_1 Nr. of seq. 1 Alignment length(with gaps) = 39  
Alignment score = 0.000000  
GCF\_000025825.1\_ASM2582v1\_genomic.fna\_1:2728911-2729106 Satlength=196 Nr  
of Repeats=5 RepeatLength=39 seed=TCTTCTTTTG Num.seqs=5  
Similarity=0.842735  
0 TCTTCTTTTGCCGCTTGCTCCTCAGCTTTTCGTTTTGCT

\*\*\*\*\*  
Consensus:

TCTTCTTTTGCCGCTTGCTCCTCAGCTTTTCGTTTTGCT

>Bacillus\_Fam\_1541\_39\_1 Nr. of seq. 1 Alignment length(with gaps) = 39  
Alignment score = 0.000000  
GCF\_000025825.1\_ASM2582v1\_genomic.fna\_8:158379-158808 Satlength=430 Nr of  
Repeats=11 RepeatLength=39 seed=TTTCATGCCTT Num.seqs=11  
Similarity=0.987568  
0 TTTCATGCCTTCCATATCATGAGAAGTGTGCTCGTCCATA

\*\*\*\*\*  
Consensus:

TTTCATGCCTTCCATATCATGAGAAGTGTGCTCGTCCATA

>Bacillus\_Fam\_1542\_39\_1 Nr. of seq. 1 Alignment length(with gaps) = 39  
Alignment score = 0.000000  
GCF\_000186145.1\_Bacillus\_sp\_2\_A\_57\_CT2\_V1\_genomic.fna\_2:34085-34280  
Satlength=196 Nr of Repeats=5 RepeatLength=39 seed=CGCCTGGATT Num.seqs=5  
Similarity=0.931624 0  
CGCCTGGATTGCCCCGGATCTTCAGGATCCGGCTCCTCTC

\*\*\*\*\*  
Consensus:

CGCCTGGATTGCCCCGGATCTTCAGGATCCGGCTCCTCTC

>Bacillus\_Fam\_1543\_39\_1 Nr. of seq. 1 Alignment length(with gaps) = 39  
Alignment score = 0.000000  
GCF\_000242895.2\_ASM24289v3\_genomic.fna\_1:3783533-3783728 Satlength=196 Nr  
of Repeats=5 RepeatLength=39 seed=TCTGGTAATT Num.seqs=5  
Similarity=1.000000 0  
TCTGGTAATTTGTTAGTTGCTTCCTCTTCATGTGCAAGC

\*\*\*\*\*  
Consensus:

TCTGGTAATTTGTTAGTTGCTTCCTCTTCATGTGCAAGC

>Bacillus\_Fam\_1544\_39\_1 Nr. of seq. 1 Alignment length(with gaps) = 39  
Alignment score = 0.000000



GCF\_000285535.1\_ASM28553v1\_genomic.fna\_2:942459-942748 Satlength=290 Nr of Repeats=5 RepeatLength=39 seed=GCGCTTTTCT Num.seqs=3 Similarity=0.977208  
0 GCGCTTTTCTTATGCTTGTCGCCGATAAACAGGCGCCTT

\*\*\*\*\*  
Consensus:

GCGCTTTTCTTATGCTTGTCGCCGATAAACAGGCGCCTT

>Bacillus\_Fam\_1545\_39\_1 Nr. of seq. 1 Alignment length(with gaps) = 39  
Alignment score = 0.000000  
GCF\_000299035.1\_ASM29903v1\_genomic.fna\_14:15269-15464 Satlength=196 Nr of Repeats=5 RepeatLength=39 seed=TTACCATTAT Num.seqs=5 Similarity=0.952137  
0 TTACCATTATCAGAGCCACTGCCATTGTTTCGTGTTGTTA

\*\*\*\*\*  
Consensus:

TTACCATTATCAGAGCCACTGCCATTGTTTCGTGTTGTTA

>Bacillus\_Fam\_1546\_39\_1 Nr. of seq. 1 Alignment length(with gaps) = 39  
Alignment score = 0.000000  
GCF\_000305495.1\_BacPsy2.0\_genomic.fna\_84:16859-17291 Satlength=433 Nr of Repeats=7 RepeatLength=39 seed=CTTTTCCTGA Num.seqs=5 Similarity=0.890598  
0 CTTTTCCTGAAGTCTACGGATCCTGTGTAGTATGGTGCG

\*\*\*\*\*  
Consensus:

CTTTTCCTGAAGTCTACGGATCCTGTGTAGTATGGTGCG

>Bacillus\_Fam\_1547\_39\_1 Nr. of seq. 1 Alignment length(with gaps) = 39  
Alignment score = 0.000000  
GCF\_000321185.1\_ASM32118v1\_genomic.fna\_73:12532-12802 Satlength=271 Nr of Repeats=7 RepeatLength=39 seed=GCTGGTTGCT Num.seqs=6 Similarity=0.949858  
0 GCTGGTTGCTGCTGCATGCCACCCATCGGTTGTTGGTAC

\*\*\*\*\*  
Consensus:

GCTGGTTGCTGCTGCATGCCACCCATCGGTTGTTGGTAC

>Bacillus\_Fam\_1548\_39\_1 Nr. of seq. 1 Alignment length(with gaps) = 39  
Alignment score = 0.000000  
GCF\_000331575.1\_ASM33157v1\_genomic.fna\_1:892265-892616 Satlength=352 Nr of Repeats=9 RepeatLength=39 seed=CTCCGTATCC Num.seqs=9 Similarity=0.798670  
0 CTCCGTATCCAGGCATTGCTCCATAGCCCGCTGGGGCTG

\*\*\*\*\*  
Consensus:

CTCCGTATCCAGGCATTGCTCCATAGCCCGCTGGGGCTG

>Bacillus\_Fam\_1549\_39\_1 Nr. of seq. 1 Alignment length(with gaps) = 39  
Alignment score = 0.000000  
GCF\_000331575.1\_ASM33157v1\_genomic.fna\_1:893092-893287 Satlength=196 Nr  
of Repeats=5 RepeatLength=39 seed=AAACCTGGCT Num.seqs=5  
Similarity=0.911111  
0 AAACCTGGCTGAGCGCCATAAGGAACTCCTGCTGCGGCG

\*\*\*\*\*

Consensus:

AAACCTGGCTGAGCGCCATAAGGAACTCCTGCTGCGGCG

>Bacillus\_Fam\_1550\_39\_1 Nr. of seq. 1 Alignment length(with gaps) = 39  
Alignment score = 0.000000  
GCF\_000331575.1\_ASM33157v1\_genomic.fna\_1:1527350-1527623 Satlength=274 Nr  
of Repeats=7 RepeatLength=39 seed=CAAAGTCTCA Num.seqs=5  
Similarity=0.829060 0  
CAAAGTCTCATAGCATGCTGATCATTGACTACATCAATG

\*\*\*\*\*

Consensus:

CAAAGTCTCATAGCATGCTGATCATTGACTACATCAATG

>Bacillus\_Fam\_1551\_39\_1 Nr. of seq. 1 Alignment length(with gaps) = 39  
Alignment score = 0.000000  
GCF\_000430785.1\_ASM43078v1\_genomic.fna\_125:5214-5682 Satlength=469 Nr of  
Repeats=4 RepeatLength=39 seed=TTACCTACT Num.seqs=3 Similarity=0.954416  
0 TTACCTACTCTTTGCTTCATTGCAGTTAAGTCCGTCAA

\*\*\*\*\*

Consensus:

TTACCTACTCTTTGCTTCATTGCAGTTAAGTCCGTCAA

>Bacillus\_Fam\_1552\_39\_1 Nr. of seq. 1 Alignment length(with gaps) = 39  
Alignment score = 0.000000  
GCF\_000474275.1\_Bmar1.0\_genomic.fna\_3:53101-53257 Satlength=157 Nr of  
Repeats=4 RepeatLength=39 seed=CTCAAGCAAA Num.seqs=4 Similarity=0.925926  
0 CTCAAGCAAATCAGTCAATGATGCCAATGAATATAGGGC

\*\*\*\*\*

Consensus:

CTCAAGCAAATCAGTCAATGATGCCAATGAATATAGGGC

>Bacillus\_Fam\_1553\_39\_1 Nr. of seq. 1 Alignment length(with gaps) = 39  
Alignment score = 0.000000  
GCF\_000504145.1\_SOAPdenovo\_for\_version2.04\_of\_Bacillus\_sp.\_FJAT-  
14515\_genome\_genomic.fna\_22:379727-380150 Satlength=424 Nr of Repeats=11  
RepeatLength=39 seed=AGGATATTGA Num.seqs=9 Similarity=0.882241 0  
AGGATATTGACCAGGGCCTCCTTGGGGCGGCAGTCC

\*\*\*\*\*

Consensus:

AGGATATTGACCAGGGCCTCCTCCTTGGGGCGGCAGTCC

>Bacillus\_Fam\_1554\_39\_1 Nr. of seq. 1 Alignment length(with gaps) = 39  
Alignment score = 0.000000  
GCF\_000526655.1\_ASM52665v1\_genomic.fna\_57:9993-10290 Satlength=298 Nr of  
Repeats=7 RepeatLength=39 seed=GGAATGGGAA Num.seqs=5 Similarity=0.952137  
0 GGAATGGGAACAGGAGGCTATCCCGGCGGAGGATTCCA

\*\*\*\*\*

Consensus:

GGAATGGGAACAGGAGGCTATCCCGGCGGAGGATTCCA

>Bacillus\_Fam\_1555\_39\_1 Nr. of seq. 1 Alignment length(with gaps) = 39  
Alignment score = 0.000000  
GCF\_000612665.1\_FF4\_genomic.fna\_72:73187-73343 Satlength=157 Nr of  
Repeats=4 RepeatLength=39 seed=GGGGGCCTGT Num.seqs=4 Similarity=0.891738  
0 GGGGGCCTGTCCCCCGCTGTTTTAACGCATTACTCCGCC

\*\*\*\*\*

Consensus:

GGGGGCCTGTCCCCCGCTGTTTTAACGCATTACTCCGCC

>Bacillus\_Fam\_1556\_39\_1 Nr. of seq. 1 Alignment length(with gaps) = 39  
Alignment score = 0.000000  
GCF\_000615945.1\_ASM61594v1\_genomic.fna\_21:1342-1537 Satlength=196 Nr of  
Repeats=5 RepeatLength=39 seed=AGAATCAACA Num.seqs=5 Similarity=0.805128  
0 AGAATCAACAGAAGAAATTCAAGCAGTAGCAGAGGAAGT

\*\*\*\*\*

Consensus:

AGAATCAACAGAAGAAATTCAAGCAGTAGCAGAGGAAGT

>Bacillus\_Fam\_1557\_39\_1 Nr. of seq. 1 Alignment length(with gaps) = 39  
Alignment score = 0.000000  
GCF\_000712595.1\_ASM71259v1\_genomic.fna\_1:262817-263012 Satlength=196 Nr  
of Repeats=5 RepeatLength=39 seed=TCTTTCTTCT Num.seqs=5  
Similarity=0.917949  
0 TCTTTCTTCTCTTCAGAAGAACCACTTGTTGATTCTCT

\*\*\*\*\*

Consensus:

TCTTTCTTCTCTTCAGAAGAACCACTTGTTGATTCTCT

>Bacillus\_Fam\_1558\_39\_1 Nr. of seq. 1 Alignment length(with gaps) = 39  
Alignment score = 0.000000

GCF\_000712595.1\_ASM71259v1\_genomic.fna\_4:298794-298989 Satlength=196 Nr  
of Repeats=5 RepeatLength=39 seed=TTTTCTTCAG Num.seqs=5  
Similarity=0.840650  
0 TTTTCTTCAGGAGCTACAGTTTCGTTACCTGTTTCAGGT

\*\*\*\*\*

Consensus:

TTTTCTTCAGGAGCTACAGTTTCGTTACCTGTTTCAGGT

>Bacillus\_Fam\_1559\_39\_1 Nr. of seq. 1 Alignment length(with gaps) = 39  
Alignment score = 0.000000  
GCF\_000712595.1\_ASM71259v1\_genomic.fna\_8:89072-89945 Satlength=874 Nr of  
Repeats=24 RepeatLength=39 seed=GCAGGTAAAG Num.seqs=16  
Similarity=0.991453  
0 GCAGGTAAAGGTGGCGCAGGAGCAGGCGAAGGTCCAGGA

\*\*\*\*\*

Consensus:

GCAGGTAAAGGTGGCGCAGGAGCAGGCGAAGGTCCAGGA

>Bacillus\_Fam\_1560\_39\_1 Nr. of seq. 1 Alignment length(with gaps) = 39  
Alignment score = 0.000000  
GCF\_000712615.1\_ASM71261v1\_genomic.fna\_52:17519-17675 Satlength=157 Nr of  
Repeats=4 RepeatLength=39 seed=CAAAACCACC Num.seqs=4 Similarity=0.811966  
0 CAAAACCACCAGTAGACCCACCAACAGATCCAGGAGATA

\*\*\*\*\*

Consensus:

CAAAACCACCAGTAGACCCACCAACAGATCCAGGAGATA

>Bacillus\_Fam\_1561\_39\_1 Nr. of seq. 1 Alignment length(with gaps) = 39  
Alignment score = 0.000000  
GCF\_000769555.1\_ASM76955v1\_genomic.fna\_1:2858012-2858741 Satlength=730 Nr  
of Repeats=19 RepeatLength=39 seed=TCTGCTGCGG Num.seqs=18  
Similarity=0.988604 0  
TCTGCTGCGGGAACGGTGTGTCCGGTGATGCGTCCGTCT

\*\*\*\*\*

Consensus:

TCTGCTGCGGGAACGGTGTGTCCGGTGATGCGTCCGTCT

>Bacillus\_Fam\_1562\_39\_1 Nr. of seq. 1 Alignment length(with gaps) = 39  
Alignment score = 0.000000  
GCF\_000829555.1\_ASM82955v1\_genomic.fna\_11:1052056-1052221 Satlength=166  
Nr of Repeats=4 RepeatLength=39 seed=GGCATATTTG Num.seqs=3  
Similarity=0.954416 0  
GGCATATTTGGCATCGGTTTCATTCGGCATTGGCATGTTC

\*\*\*\*\*

Consensus:

GGCATATTTGGCATCGGTTTCATTCGGCATTGGCATGTTC

>Bacillus\_Fam\_1563\_39\_1 Nr. of seq. 1 Alignment length(with gaps) = 39  
Alignment score = 0.000000  
GCF\_000831065.1\_ASM83106v1\_genomic.fna\_1:809013-809169 Satlength=157 Nr  
of Repeats=4 RepeatLength=39 seed=CAAAGATAGA Num.seqs=4  
Similarity=0.931624  
0 CAAAGATAGAAGAGAAGAAACTGAAGATAAAGAAACAG

\*\*\*\*\*  
Consensus:

CAAAGATAGAAGAGAAGAAACTGAAGATAAAGAAACAG

>Bacillus\_Fam\_1564\_39\_1 Nr. of seq. 1 Alignment length(with gaps) = 39  
Alignment score = 0.000000  
GCF\_001273755.1\_ASM127375v1\_genomic.fna\_17:4517711-4518605 Satlength=895  
Nr of Repeats=23 RepeatLength=39 seed=CCTTGACCTC Num.seqs=22  
Similarity=0.957968 0  
CCTTGACCTCCCGGCATCATCGGAAATCCTCCAGGCTGA

\*\*\*\*\*  
Consensus:

CCTTGACCTCCCGGCATCATCGGAAATCCTCCAGGCTGA

>Bacillus\_Fam\_1565\_39\_1 Nr. of seq. 1 Alignment length(with gaps) = 39  
Alignment score = 0.000000  
GCF\_001274935.1\_ASM127493v1\_genomic.fna\_27:120842-121037 Satlength=196 Nr  
of Repeats=4 RepeatLength=39 seed=AGATCTGGTC Num.seqs=3  
Similarity=0.863248 0  
AGATCTGGTCGTTCTCGTAGATCCCGCGTTCTGGAGGC

\*\*\*\*\*  
Consensus:

AGATCTGGTCGTTCTCGTAGATCCCGCGTTCTGGAGGC

>Bacillus\_Fam\_1566\_39\_1 Nr. of seq. 1 Alignment length(with gaps) = 39  
Alignment score = 0.000000  
GCF\_001274935.1\_ASM127493v1\_genomic.fna\_27:368943-369780 Satlength=838 Nr  
of Repeats=20 RepeatLength=39 seed=CCTGGCATCA Num.seqs=13  
Similarity=0.903134 0  
CCTGGCATCATTGGCTGGCCGCTCATTCCTTGACCCATT

\*\*\*\*\*  
Consensus:

CCTGGCATCATTGGCTGGCCGCTCATTCCTTGACCCATT

>Bacillus\_Fam\_1567\_39\_1 Nr. of seq. 1 Alignment length(with gaps) = 39  
Alignment score = 0.000000

GCF\_001274935.1\_ASM127493v1\_genomic.fna\_36:331062-331251 Satlength=190 Nr of Repeats=5 RepeatLength=39 seed=TGATCATGAC Num.seqs=4  
Similarity=0.931624 0  
TGATCATGACTATGACTGTGACCTTCGTGACTGTGTTTCG

\*\*\*\*\*  
Consensus:

TGATCATGACTATGACTGTGACCTTCGTGACTGTGTTTCG

>Bacillus\_Fam\_1568\_39\_1 Nr. of seq. 1 Alignment length(with gaps) = 39  
Alignment score = 0.000000  
GCF\_001315085.1\_ASM131508v1\_genomic.fna\_47:6-162 Satlength=157 Nr of Repeats=4 RepeatLength=39 seed=GGATGGGGAA Num.seqs=4 Similarity=0.863248  
0 GGATGGGGAAGCGGATTCCCACAAACACCAGGCCAAAGC

\*\*\*\*\*  
Consensus:

GGATGGGGAAGCGGATTCCCACAAACACCAGGCCAAAGC

>Bacillus\_Fam\_1569\_39\_1 Nr. of seq. 1 Alignment length(with gaps) = 39  
Alignment score = 0.000000  
GCF\_001420595.1\_ASM142059v1\_genomic.fna\_11:2191867-2192027 Satlength=161  
Nr of Repeats=4 RepeatLength=40 seed=CAAATAAAAT Num.seqs=4  
Similarity=0.566667 0  
CAAATAAAATGAGAGTTTCGCAAAAATAAAGCGTTCTTG

\*\*\*\*\*  
Consensus:

CAAATAAAATGAGAGTTTCGCAAAAATAAAGCGTTCTTG

>Bacillus\_Fam\_1570\_39\_1 Nr. of seq. 1 Alignment length(with gaps) = 39  
Alignment score = 0.000000  
GCF\_001578205.1\_ASM157820v1\_genomic.fna\_2:10302-10458 Satlength=157 Nr of Repeats=4 RepeatLength=39 seed=AAGCTGTAGA Num.seqs=4 Similarity=0.931624  
0 AAGCTGTAGAGAAGCAGGAACCGGCCAAGGAAGCAGCAC

\*\*\*\*\*  
Consensus:

AAGCTGTAGAGAAGCAGGAACCGGCCAAGGAAGCAGCAC

>Bacillus\_Fam\_1571\_39\_1 Nr. of seq. 1 Alignment length(with gaps) = 39  
Alignment score = 0.000000  
GCF\_001591945.1\_ASM159194v1\_genomic.fna\_7:147123-147357 Satlength=235 Nr of Repeats=6 RepeatLength=39 seed=TGCATTGGCA Num.seqs=6  
Similarity=0.938462  
0 TGCATTGGCATTTGACCTTGATCTGGCATATATGGTTGC

\*\*\*\*\*  
Consensus:

TGCATTGGCATTTCGACCTTGATCTGGCATATATGGTTGC

>Bacillus\_Fam\_1572\_39\_1 Nr. of seq. 1 Alignment length(with gaps) = 39  
Alignment score = 0.000000  
GCF\_001636325.1\_ASM163632v1\_genomic.fna\_1:545978-546593 Satlength=616 Nr  
of Repeats=16 RepeatLength=39 seed=TTCTGCGAGA Num.seqs=13  
Similarity=0.914092 0  
TTCTGCGAGAACGGCATGATCTGCGCGTGCCTCTCGTGC

\*\*\*\*\*  
Consensus:

TTCTGCGAGAACGGCATGATCTGCGCGTGCCTCTCGTGC

>Bacillus\_Fam\_1573\_39\_1 Nr. of seq. 1 Alignment length(with gaps) = 39  
Alignment score = 0.000000  
GCF\_001636335.1\_ASM163633v1\_genomic.fna\_1:1653655-1653811 Satlength=157  
Nr of Repeats=4 RepeatLength=39 seed=TTTGTGTTTG Num.seqs=4  
Similarity=0.811966 0  
TTTGTGTTTGCGTTTGAGCTGGTTGCTTTTCTACCGGCT

\*\*\*\*\*  
Consensus:

TTTGTGTTTGCGTTTGAGCTGGTTGCTTTTCTACCGGCT

>Bacillus\_Fam\_1574\_39\_1 Nr. of seq. 1 Alignment length(with gaps) = 39  
Alignment score = 0.000000  
GCF\_001712755.1\_ASM171275v1\_genomic.fna\_7:93822-93969 Satlength=148 Nr of  
Repeats=4 RepeatLength=39 seed=GCTTTAGAGT Num.seqs=3 Similarity=0.886040  
0 GCTTTAGAGTTGAATCTGTATCAGAATTATTTGAATCGT

\*\*\*\*\*  
Consensus:

GCTTTAGAGTTGAATCTGTATCAGAATTATTTGAATCGT

>Bacillus\_Fam\_1575\_39\_1 Nr. of seq. 1 Alignment length(with gaps) = 39  
Alignment score = 0.000000  
GCF\_001712755.1\_ASM171275v1\_genomic.fna\_13:255755-256136 Satlength=382 Nr  
of Repeats=11 RepeatLength=39 seed=CAACAACTGG Num.seqs=7  
Similarity=0.882784 0  
CAACAACTGGTGAGACAACTGGAGGAACAACCGGCAGCA

\*\*\*\*\*  
Consensus:

CAACAACTGGTGAGACAACTGGAGGAACAACCGGCAGCA

>Bacillus\_Fam\_1576\_39\_1 Nr. of seq. 1 Alignment length(with gaps) = 39  
Alignment score = 0.000000  
GCF\_002019605.1\_ASM201960v1\_genomic.fna\_1:2847050-2847845 Satlength=796  
Nr of Repeats=9 RepeatLength=39 seed=TGTGGTGCCA Num.seqs=6

Similarity=0.977208 0  
TGTGGTGCCATTTGATGCGGTTGATACGGCATCGCCTGC

\*\*\*\*\*  
Consensus:

TGTGGTGCCATTTGATGCGGTTGATACGGCATCGCCTGC

>Bacillus\_Fam\_1577\_39\_1 Nr. of seq. 1 Alignment length(with gaps) = 39  
Alignment score = 0.000000  
GCF\_002019635.1\_ASM201963v1\_genomic.fna\_1:1500315-1500474 Satlength=160  
Nr of Repeats=4 RepeatLength=39 seed=CATGTTCTTC Num.seqs=3  
Similarity=0.954416 0  
CATGTTCTTCTTCATGAGCAGCCTCAGTTTCATCATGTG

\*\*\*\*\*  
Consensus:

CATGTTCTTCTTCATGAGCAGCCTCAGTTTCATCATGTG

>Bacillus\_Fam\_1578\_39\_1 Nr. of seq. 1 Alignment length(with gaps) = 39  
Alignment score = 0.000000  
GCF\_002019635.1\_ASM201963v1\_genomic.fna\_1:2134773-2135010 Satlength=238  
Nr of Repeats=6 RepeatLength=39 seed=AAAACAACAA Num.seqs=5  
Similarity=0.833333 0  
AAAACAACAACAAGAGCAGCAACAGCAGCAGGCCCAACA

\*\*\*\*\*  
Consensus:

AAAACAACAACAAGAGCAGCAACAGCAGCAGGCCCAACA

>Bacillus\_Fam\_1579\_39\_1 Nr. of seq. 1 Alignment length(with gaps) = 39  
Alignment score = 0.000000  
GCF\_002019645.1\_ASM201964v1\_genomic.fna\_1:1404723-1404996 Satlength=274  
Nr of Repeats=7 RepeatLength=39 seed=TCTTCTTCCT Num.seqs=7  
Similarity=0.916972 0  
TCTTCTTCCTCATGGGCATGTTTCATCGTCAGCGTGNTGC

\*\*\*\*\*  
Consensus:

TCTTCTTCCTCATGGGCATGTTTCATCGTCAGCGTGNTGC

>Bacillus\_Fam\_1580\_39\_1 Nr. of seq. 1 Alignment length(with gaps) = 39  
Alignment score = 0.000000  
GCF\_900093775.1\_EVONIK\_BGLY\_genomic.fna\_1:3164589-3164784 Satlength=196  
Nr of Repeats=5 RepeatLength=39 seed=GCTTTCTTCC Num.seqs=5  
Similarity=0.883761 0  
GCTTTCTTCCATTCTCGGTTCCGCTTTTGCGTCCCTGCT

\*\*\*\*\*  
Consensus:



GCTTTCTTCCATTCTCGGTTCCGCTTTTGCGTCCCTGCT

>Bacillus\_Fam\_1581\_39\_1 Nr. of seq. 1 Alignment length(with gaps) = 39  
Alignment score = 0.000000  
GCF\_900098925.1\_PRJEB15625\_genomic.fna\_15:229366-229608 Satlength=243 Nr  
of Repeats=5 RepeatLength=39 seed=CACGGCTGGC Num.seqs=3  
Similarity=0.886040  
0 CACGGCTGGCCGGGTCAAGGCGGGTCTGGCTCCGGCGGG

\*\*\*\*\*  
Consensus:

CACGGCTGGCCGGGTCAAGGCGGGTCTGGCTCCGGCGGG

>Bacillus\_Fam\_1582\_39\_1 Nr. of seq. 1 Alignment length(with gaps) = 39  
Alignment score = 0.000000  
GCF\_900098925.1\_PRJEB15625\_genomic.fna\_16:204771-204963 Satlength=193 Nr  
of Repeats=5 RepeatLength=39 seed=CCCTGCATAT Num.seqs=4  
Similarity=0.943020  
0 CCCTGCATATGATGTCCGTGTCCCATATCCGGCATGTTT

\*\*\*\*\*  
Consensus:

CCCTGCATATGATGTCCGTGTCCCATATCCGGCATGTTT

>Bacillus\_Fam\_1583\_39\_1 Nr. of seq. 1 Alignment length(with gaps) = 39  
Alignment score = 0.000000  
GCF\_900103955.1\_IMG-  
taxon\_2617270767\_annotated\_assembly\_genomic.fna\_20:6914-7262  
Satlength=349 Nr of Repeats=8 RepeatLength=39 seed=CGTTCGGCTT Num.seqs=6  
Similarity=0.835897 0  
CGTTCGGCTTCTTCCGCAGCAATGCGCTCTTCCTCCTCA

\*\*\*\*\*  
Consensus:

CGTTCGGCTTCTTCCGCAGCAATGCGCTCTTCCTCCTCA

>Bacillus\_Fam\_1584\_39\_1 Nr. of seq. 1 Alignment length(with gaps) = 39  
Alignment score = 0.000000  
GCF\_900104555.1\_IMG-  
taxon\_2651870172\_annotated\_assembly\_genomic.fna\_13:10452-10608  
Satlength=157 Nr of Repeats=4 RepeatLength=39 seed=TATCAACCAG Num.seqs=4  
Similarity=0.960114 0  
TATCAACCAGCACCGTTTCCACAAGGTGGTCAAATGGGA

\*\*\*\*\*  
Consensus:

TATCAACCAGCACCGTTTCCACAAGGTGGTCAAATGGGA

>Bacillus\_Fam\_1585\_38\_1 Nr. of seq. 1 Alignment length(with gaps) = 38  
Alignment score = 0.000000  
GCF\_900107275.1\_IMG-  
taxon\_2675903024\_annotated\_assembly\_genomic.fna\_37:151112-151470  
Satlength=359 Nr of Repeats=5 RepeatLength=38 seed=TTTGCTTCGT Num.seqs=3  
Similarity=1.000000 0  
TTTGCTTCGTAGTCTTCCCTGTTTCTTCCTCTGCCAGC

\*\*\*\*\*

Consensus:

TTTGCTTCGTAGTCTTCCCTGTTTCTTCCTCTGCCAGC

>Bacillus\_Fam\_1586\_37\_1 Nr. of seq. 1 Alignment length(with gaps) = 37  
Alignment score = 0.000000  
GCF\_000331575.1\_ASM33157v1\_genomic.fna\_4:174812-175053 Satlength=242 Nr  
of Repeats=6 RepeatLength=37 seed=GAAATCGGCC Num.seqs=4  
Similarity=0.861862  
0 GAAATCGGCCTTATTGCACGTTATCGGGCTTGTTGCA

\*\*\*\*\*

Consensus:

GAAATCGGCCTTATTGCACGTTATCGGGCTTGTTGCA

>Bacillus\_Fam\_1587\_36\_1 Nr. of seq. 1 Alignment length(with gaps) = 36  
Alignment score = 0.000000  
GCF\_000007825.1\_ASM782v1\_genomic.fna\_1:2019353-2019731 Satlength=379 Nr  
of Repeats=13 RepeatLength=36 seed=AAAACCTGAT Num.seqs=8  
Similarity=0.898148  
0 AAAACCTGATACGGGAGGAAATCCAGACACAGGAGG

\*\*\*\*\*

Consensus:

AAAACCTGATACGGGAGGAAATCCAGACACAGGAGG

>Bacillus\_Fam\_1588\_36\_1 Nr. of seq. 1 Alignment length(with gaps) = 36  
Alignment score = 0.000000  
GCF\_000011145.1\_ASM1114v1\_genomic.fna\_1:1314924-1315176 Satlength=253 Nr  
of Repeats=7 RepeatLength=36 seed=ATGGATCAAAA Num.seqs=7  
Similarity=0.961199  
0 ATGGATCAAAAACGTGCATCCGCAGCAATGGCCGCAA

\*\*\*\*\*

Consensus:

ATGGATCAAAAACGTGCATCCGCAGCAATGGCCGCAA

>Bacillus\_Fam\_1589\_36\_1 Nr. of seq. 1 Alignment length(with gaps) = 36  
Alignment score = 0.000000  
GCF\_000262045.1\_KCTC\_13613\_01\_genomic.fna\_39:441056-441350 Satlength=295  
Nr of Repeats=8 RepeatLength=36 seed=TTTTGTGAGA Num.seqs=6

Similarity=0.886420

0

TTTTGTGAGAACGTGATTTTTTATGGCTGCGGGATT

\*\*\*\*\*

Consensus:

TTTTGTGAGAACGTGATTTTTTATGGCTGCGGGATT

>Bacillus\_Fam\_1590\_36\_1 Nr. of seq. 1 Alignment length(with gaps) = 36

Alignment score = 0.000000

GCF\_000285535.1\_ASM28553v1\_genomic.fna\_4:98805-98913 Satlength=109 Nr of  
Repeats=5 RepeatLength=36 seed=ATGCAGGGTA Num.seqs=3 Similarity=0.925926

0 ATGCAGGGTATGCAGGGTAGAGCTGGCCTGGGGGGT

\*\*\*\*\*

Consensus:

ATGCAGGGTATGCAGGGTAGAGCTGGCCTGGGGGGT

>Bacillus\_Fam\_1591\_36\_1 Nr. of seq. 1 Alignment length(with gaps) = 36

Alignment score = 0.000000

GCF\_000305495.1\_BacPsy2.0\_genomic.fna\_193:33-213 Satlength=181 Nr of  
Repeats=5 RepeatLength=36 seed=ACAGGTGATA Num.seqs=5 Similarity=0.796296

0 ACAGGTGATACCGGGGCNACCGGAGTAACNGGAGCA

\*\*\*\*\*

Consensus:

ACAGGTGATACCGGGGCNACCGGAGTAACNGGAGCA

>Bacillus\_Fam\_1592\_36\_1 Nr. of seq. 1 Alignment length(with gaps) = 36

Alignment score = 0.000000

GCF\_000307875.1\_BABA1.0\_genomic.fna\_146:993-1137 Satlength=145 Nr of  
Repeats=4 RepeatLength=36 seed=AAAAGGGAAT Num.seqs=4 Similarity=0.919753

0 AAAAGGGAATTGGAAGTGCAGTCAGAACAACAGAGA

\*\*\*\*\*

Consensus:

AAAAGGGAATTGGAAGTGCAGTCAGAACAACAGAGA

>Bacillus\_Fam\_1593\_36\_1 Nr. of seq. 1 Alignment length(with gaps) = 36

Alignment score = 0.000000

GCF\_000321185.1\_ASM32118v1\_genomic.fna\_87:51026-51170 Satlength=145 Nr of  
Repeats=4 RepeatLength=36 seed=CTTCTGGTTT Num.seqs=4 Similarity=0.944444

0 CTTCTGGTTTATTGTTATCAACAACCTGGTTGATCTG

\*\*\*\*\*

Consensus:

CTTCTGGTTTATTGTTATCAACAACCTGGTTGATCTG

>Bacillus\_Fam\_1594\_36\_1 Nr. of seq. 1 Alignment length(with gaps) = 36

Alignment score = 0.000000

GCF\_000331575.1\_ASM33157v1\_genomic.fna\_1:1603161-1603305 Satlength=145 Nr of Repeats=4 RepeatLength=36 seed=TCGCTTTGAT Num.seqs=4  
Similarity=0.827160 0

TCGCTTTGATTTTGGTTTTGGGACAAGCCCTCGTCC

\*\*\*\*\*

Consensus:

TCGCTTTGATTTTGGTTTTGGGACAAGCCCTCGTCC

>Bacillus\_Fam\_1595\_36\_1 Nr. of seq. 1 Alignment length(with gaps) = 36

Alignment score = 0.000000

GCF\_000374565.1\_ASM37456v1\_genomic.fna\_18:1732-1914 Satlength=183 Nr of Repeats=5 RepeatLength=36 seed=TTTTCATCCA Num.seqs=3 Similarity=0.950617  
0 TTTTCATCCAAAGGGCAGCCGAAAAGCAAACCAGG

\*\*\*\*\*

Consensus:

TTTTCATCCAAAGGGCAGCCGAAAAGCAAACCAGG

>Bacillus\_Fam\_1596\_36\_1 Nr. of seq. 1 Alignment length(with gaps) = 36

Alignment score = 0.000000

GCF\_000380245.2\_ASM38024v2\_genomic.fna\_12:377405-377621 Satlength=217 Nr of Repeats=6 RepeatLength=36 seed=CAGACATATC Num.seqs=6  
Similarity=0.967901  
0 CAGACATATCAACCAAATCAAATGACGATGCCACAA

\*\*\*\*\*

Consensus:

CAGACATATCAACCAAATCAAATGACGATGCCACAA

>Bacillus\_Fam\_1597\_36\_1 Nr. of seq. 1 Alignment length(with gaps) = 36

Alignment score = 0.000000

GCF\_000401235.1\_BacNeaAAU1\_genomic.fna\_112:56318-56642 Satlength=325 Nr of Repeats=9 RepeatLength=36 seed=CTATCTCTTC Num.seqs=9  
Similarity=0.787287  
0 CTATCTCTTCAGTTACTTCGACTTCTGGAGTTACAG

\*\*\*\*\*

Consensus:

CTATCTCTTCAGTTACTTCGACTTCTGGAGTTACAG

>Bacillus\_Fam\_1598\_36\_1 Nr. of seq. 1 Alignment length(with gaps) = 36

Alignment score = 0.000000

GCF\_000430785.1\_ASM43078v1\_genomic.fna\_4:125493-125637 Satlength=145 Nr of Repeats=4 RepeatLength=36 seed=CCGCTTCCTG Num.seqs=4  
Similarity=0.981481  
0 CCGCTTCCTGGAGCATCTGGTTGATTCCTTCTTG

\*\*\*\*\*

Consensus:

CCGCTTCCTGGAGCATCTGGTTGATTCCTTCTTGG

>Bacillus\_Fam\_1599\_36\_1 Nr. of seq. 1 Alignment length(with gaps) = 36  
Alignment score = 0.000000  
GCF\_000496285.1\_ASM49628v1\_genomic.fna\_1:1885990-1886788 Satlength=799 Nr  
of Repeats=13 RepeatLength=36 seed=CTTCTGCAAC Num.seqs=11  
Similarity=0.955556 0  
CTTCTGCAACTGGTTGTTCTTCAGCGACTGGCCCTT

\*\*\*\*\*

Consensus:

CTTCTGCAACTGGTTGTTCTTCAGCGACTGGCCCTT

>Bacillus\_Fam\_1600\_36\_1 Nr. of seq. 1 Alignment length(with gaps) = 36  
Alignment score = 0.000000  
GCF\_000612625.1\_JCE\_genomic.fna\_1:141216-141576 Satlength=361 Nr of  
Repeats=10 RepeatLength=36 seed=GGGCGGATTC Num.seqs=10  
Similarity=0.758674  
0 GGGCGGATTCCCTGGTCANGGTGGNCATGGNGGAAT

\*\*\*\*\*

Consensus:

GGGCGGATTCCCTGGTCANGGTGGNCATGGNGGAAT

>Bacillus\_Fam\_1601\_36\_1 Nr. of seq. 1 Alignment length(with gaps) = 36  
Alignment score = 0.000000  
GCF\_000612625.1\_JCE\_genomic.fna\_1:153492-153708 Satlength=217 Nr of  
Repeats=6 RepeatLength=36 seed=TCCAAAGGCA Num.seqs=6 Similarity=0.906173  
0 TCCAAAGGCAGTGGTGGATCGAAAGGAAGTCATGGC

\*\*\*\*\*

Consensus:

TCCAAAGGCAGTGGTGGATCGAAAGGAAGTCATGGC

>Bacillus\_Fam\_1602\_36\_1 Nr. of seq. 1 Alignment length(with gaps) = 36  
Alignment score = 0.000000  
GCF\_000612625.1\_JCE\_genomic.fna\_6:65616-65796 Satlength=181 Nr of  
Repeats=5 RepeatLength=36 seed=CTGTTATTTC Num.seqs=5 Similarity=0.837037  
0 CTGTTATTTCCGCCACTTCGACTACGTCATCTACAC

\*\*\*\*\*

Consensus:

CTGTTATTTCCGCCACTTCGACTACGTCATCTACAC

>Bacillus\_Fam\_1603\_36\_1 Nr. of seq. 1 Alignment length(with gaps) = 36  
Alignment score = 0.000000  
GCF\_000621445.1\_ASM62144v1\_genomic.fna\_3:309868-310012 Satlength=145 Nr  
of Repeats=4 RepeatLength=36 seed=GTGTCATCCC Num.seqs=4

Similarity=0.888889  
0 GTGTCATCCCCAGTACCTGGACTTCCTCCATTATCC

\*\*\*\*\*  
Consensus:

GTGTCATCCCCAGTACCTGGACTTCCTCCATTATCC

>Bacillus\_Fam\_1604\_36\_1 Nr. of seq. 1 Alignment length(with gaps) = 36  
Alignment score = 0.000000  
GCF\_000706725.1\_ASM70672v1\_genomic.fna\_1:3481500-3481644 Satlength=145 Nr  
of Repeats=4 RepeatLength=36 seed=GTTTCTTCCT Num.seqs=4  
Similarity=0.932099 0  
GTTTCTTCCTCTACTGCTTCTTCCGGCGCTTCTGAA

\*\*\*\*\*  
Consensus:

GTTTCTTCCTCTACTGCTTCTTCCGGCGCTTCTGAA

>Bacillus\_Fam\_1605\_36\_1 Nr. of seq. 1 Alignment length(with gaps) = 36  
Alignment score = 0.000000  
GCF\_000712615.1\_ASM71261v1\_genomic.fna\_6:44543-44699 Satlength=157 Nr of  
Repeats=4 RepeatLength=36 seed=ACTAGCTCTT Num.seqs=3 Similarity=0.950617  
0 ACTAGCTCTTCTTCAAATGCTTCCTCTGTTTCCGCA

\*\*\*\*\*  
Consensus:

ACTAGCTCTTCTTCAAATGCTTCCTCTGTTTCCGCA

>Bacillus\_Fam\_1606\_36\_1 Nr. of seq. 1 Alignment length(with gaps) = 36  
Alignment score = 0.000000  
GCF\_000724485.1\_ASM72448v1\_genomic.fna\_1:1629403-1629607 Satlength=205 Nr  
of Repeats=4 RepeatLength=36 seed=GCTTCAAGAA Num.seqs=3  
Similarity=0.827160 0  
GCTTCAAGAAACACCATTTGTGACTGCTGTGACAAGT

\*\*\*\*\*  
Consensus:

GCTTCAAGAAACACCATTTGTGACTGCTGTGACAAGT

>Bacillus\_Fam\_1607\_36\_1 Nr. of seq. 1 Alignment length(with gaps) = 36  
Alignment score = 0.000000  
GCF\_000742675.1\_ASM74267v1\_genomic.fna\_1:639619-639763 Satlength=145 Nr  
of Repeats=4 RepeatLength=36 seed=TGCAGCAGCA Num.seqs=4  
Similarity=0.888889  
0 TGCAGCAGCAGGAAGCACGGAAGCATGAGGAGACGT

\*\*\*\*\*  
Consensus:

TGCAGCAGCAGGAAGCACGGAAGCATGAGGAGACGT

>Bacillus\_Fam\_1608\_36\_1 Nr. of seq. 1 Alignment length(with gaps) = 36  
Alignment score = 0.000000  
GCF\_000759675.1\_ASM75967v1\_genomic.fna\_79:5447-5843 Satlength=397 Nr of  
Repeats=11 RepeatLength=36 seed=ACAAGCATGA Num.seqs=7  
Similarity=0.715507  
0 ACAAGCATGATGACTGTAATAAACGAGACAGAAACG

\*\*\*\*\*

Consensus:

ACAAGCATGATGACTGTAATAAACGAGACAGAAACG

>Bacillus\_Fam\_1609\_36\_1 Nr. of seq. 1 Alignment length(with gaps) = 36  
Alignment score = 0.000000  
GCF\_000812025.2\_ASM81202v2\_genomic.fna\_59:10582-10798 Satlength=217 Nr of  
Repeats=6 RepeatLength=36 seed=CGATGCATGC Num.seqs=6 Similarity=0.846914  
0 CGATGCATGCTCAGCCAATGATGTACCCAGACAATG

\*\*\*\*\*

Consensus:

CGATGCATGCTCAGCCAATGATGTACCCAGACAATG

>Bacillus\_Fam\_1610\_36\_1 Nr. of seq. 1 Alignment length(with gaps) = 36  
Alignment score = 0.000000  
GCF\_000812025.2\_ASM81202v2\_genomic.fna\_69:27049-27229 Satlength=181 Nr of  
Repeats=4 RepeatLength=36 seed=CGAAGAAACC Num.seqs=3 Similarity=0.827160  
0 CGAAGAAACCAGACGGATACAAAAGGATGACGATT

\*\*\*\*\*

Consensus:

CGAAGAAACCAGACGGATACAAAAGGATGACGATT

>Bacillus\_Fam\_1611\_36\_1 Nr. of seq. 1 Alignment length(with gaps) = 36  
Alignment score = 0.000000  
GCF\_000813125.1\_ASM81312v1\_genomic.fna\_55:48259-48403 Satlength=145 Nr of  
Repeats=4 RepeatLength=36 seed=TCTTCTTCGG Num.seqs=4 Similarity=0.796296  
0 TCTTCTTCGGAGTGAGCGGCTTCTTCGTCATGGTGC

\*\*\*\*\*

Consensus:

TCTTCTTCGGAGTGAGCGGCTTCTTCGTCATGGTGC

>Bacillus\_Fam\_1612\_36\_1 Nr. of seq. 1 Alignment length(with gaps) = 36  
Alignment score = 0.000000  
GCF\_000832605.1\_ASM83260v1\_genomic.fna\_1:2585613-2585757 Satlength=145 Nr  
of Repeats=4 RepeatLength=36 seed=GAACCGAAAA Num.seqs=4  
Similarity=0.956790  
GAACCGAAAAACAGAAAAGCCAGATGGTAAACCAGAA

0

\*\*\*\*\*

Consensus:

GAACCGAAAACAGAAAAGCCAGATGGTAAACCAGAA

>Bacillus\_Fam\_1613\_36\_1 Nr. of seq. 1 Alignment length(with gaps) = 36  
Alignment score = 0.000000  
GCF\_000972245.2\_ASM97224v2\_genomic.fna\_1:2081436-2082147 Satlength=712 Nr  
of Repeats=20 RepeatLength=36 seed=GTAGGTCCAG Num.seqs=19  
Similarity=0.891705 0  
GTAGGTCCAGTCGGTCCAAGGTCGCCGGTAGCACCT

\*\*\*\*\*

Consensus:

GTAGGTCCAGTCGGTCCAAGGTCGCCGGTAGCACCT

>Bacillus\_Fam\_1614\_36\_1 Nr. of seq. 1 Alignment length(with gaps) = 36  
Alignment score = 0.000000  
GCF\_000986785.1\_ASM98678v1\_genomic.fna\_8:166666-166882 Satlength=217 Nr  
of Repeats=6 RepeatLength=36 seed=TTTTCCTCCG Num.seqs=6  
Similarity=0.930864  
0 TTTTCCTCCGGCTCCTGTTCCAGGACGAAATCCGGC

\*\*\*\*\*

Consensus:

TTTTCCTCCGGCTCCTGTTCCAGGACGAAATCCGGC

>Bacillus\_Fam\_1615\_36\_1 Nr. of seq. 1 Alignment length(with gaps) = 36  
Alignment score = 0.000000  
GCF\_000986785.1\_ASM98678v1\_genomic.fna\_101:89652-90012 Satlength=361 Nr  
of Repeats=10 RepeatLength=36 seed=CCGCAAATGG Num.seqs=10  
Similarity=0.847737 0  
CCGCAAATGGGCTATGGCCCGCAAGCTGGATTTCGCC

\*\*\*\*\*

Consensus:

CCGCAAATGGGCTATGGCCCGCAAGCTGGATTTCGCC

>Bacillus\_Fam\_1616\_36\_1 Nr. of seq. 1 Alignment length(with gaps) = 36  
Alignment score = 0.000000  
GCF\_001273755.1\_ASM127375v1\_genomic.fna\_17:1088058-1088238 Satlength=181  
Nr of Repeats=5 RepeatLength=36 seed=GGAGGAGGTC Num.seqs=5  
Similarity=0.933333 0  
GGAGGAGGTCAACCGCCGCGGCGACCAACCAAGGG

\*\*\*\*\*

Consensus:

GGAGGAGGTCAACCGCCGCGGCGACCAACCAAGGG

>Bacillus\_Fam\_1617\_36\_1 Nr. of seq. 1 Alignment length(with gaps) = 36  
Alignment score = 0.000000



GCF\_001439915.1\_ASM143991v1\_genomic.fna\_105:131730-131874 Satlength=145  
Nr of Repeats=4 RepeatLength=36 seed=GAAGATGATC Num.seqs=4  
Similarity=0.808642 0  
GAAGATGATCAATCGGACACCGATGACACAGAAGGG

\*\*\*\*\*  
Consensus:

GAAGATGATCAATCGGACACCGATGACACAGAAGGG

>Bacillus\_Fam\_1618\_36\_1 Nr. of seq. 1 Alignment length(with gaps) = 36  
Alignment score = 0.000000  
GCF\_001578185.1\_ASM157818v1\_genomic.fna\_1:1776217-1776385 Satlength=169  
Nr of Repeats=5 RepeatLength=36 seed=CAATGGGACG Num.seqs=4  
Similarity=0.944444 0  
CAATGGGACGGACATGGCGGAGGTCATGGTGGCGGT

\*\*\*\*\*  
Consensus:

CAATGGGACGGACATGGCGGAGGTCATGGTGGCGGT

>Bacillus\_Fam\_1619\_36\_1 Nr. of seq. 1 Alignment length(with gaps) = 36  
Alignment score = 0.000000  
GCF\_001590785.1\_ASM159078v1\_genomic.fna\_23:164317-164461 Satlength=145 Nr  
of Repeats=4 RepeatLength=36 seed=TTTCCTCGCC Num.seqs=4  
Similarity=0.870370 0  
TTTCCTCGCCTCCGTCATTTTCTTCCGAGACTCTG

\*\*\*\*\*  
Consensus:

TTTCCTCGCCTCCGTCATTTTCTTCCGAGACTCTG

>Bacillus\_Fam\_1620\_36\_1 Nr. of seq. 1 Alignment length(with gaps) = 36  
Alignment score = 0.000000  
GCF\_001590785.1\_ASM159078v1\_genomic.fna\_23:392091-392217 Satlength=127 Nr  
of Repeats=4 RepeatLength=36 seed=TCTTCGCCTT Num.seqs=3  
Similarity=0.925926 0  
TCTTCGCCTTCGACTGGTTCTTCTCCCTCAACTGGC

\*\*\*\*\*  
Consensus:

TCTTCGCCTTCGACTGGTTCTTCTCCCTCAACTGGC

>Bacillus\_Fam\_1621\_36\_1 Nr. of seq. 1 Alignment length(with gaps) = 36  
Alignment score = 0.000000  
GCF\_001591445.1\_ASM159144v1\_genomic.fna\_59:421-646 Satlength=226 Nr of  
Repeats=4 RepeatLength=36 seed=TGTTGGTGCT Num.seqs=3 Similarity=0.864198  
0 TGTTGGTGCTTTTGNGCTTGTCAGGTTTCGATAC

\*\*\*\*\*  
Consensus:

TGTTGGTGCTTTTGNGCTTGTCCCAGGTTTCGATAC

>Bacillus\_Fam\_1622\_36\_1 Nr. of seq. 1 Alignment length(with gaps) = 36  
Alignment score = 0.000000  
GCF\_001591625.1\_ASM159162v1\_genomic.fna\_26:7794-8010 Satlength=217 Nr of  
Repeats=6 RepeatLength=36 seed=AGAGAAAATA Num.seqs=6 Similarity=0.871605  
0 AGAGAAAATAACAAGAACAAGCAAACCAACAGGCA

\*\*\*\*\*  
Consensus:

AGAGAAAATAACAAGAACAAGCAAACCAACAGGCA

>Bacillus\_Fam\_1623\_36\_1 Nr. of seq. 1 Alignment length(with gaps) = 36  
Alignment score = 0.000000  
GCF\_001591665.1\_ASM159166v1\_genomic.fna\_83:5099-5375 Satlength=277 Nr of  
Repeats=8 RepeatLength=36 seed=TTCTTCTGTT Num.seqs=7 Similarity=0.846561  
0 TTCTTCTGTTACAACCTTCAGTAGNTTCGTTAGTTGC

\*\*\*\*\*  
Consensus:

TTCTTCTGTTACAACCTTCAGTAGNTTCGTTAGTTGC

>Bacillus\_Fam\_1624\_36\_1 Nr. of seq. 1 Alignment length(with gaps) = 36  
Alignment score = 0.000000  
GCF\_001636325.1\_ASM163632v1\_genomic.fna\_2:690522-690702 Satlength=181 Nr  
of Repeats=5 RepeatLength=36 seed=GGTCTTTTAA Num.seqs=5  
Similarity=0.948148  
0 GGTCTTTTAAATTGGTTCTTCACTAGGTTGTTTAGCT

\*\*\*\*\*  
Consensus:

GGTCTTTTAAATTGGTTCTTCACTAGGTTGTTTAGCT

>Bacillus\_Fam\_1625\_36\_1 Nr. of seq. 1 Alignment length(with gaps) = 36  
Alignment score = 0.000000  
GCF\_001636345.1\_ASM163634v1\_genomic.fna\_1:4287145-4287451 Satlength=307  
Nr of Repeats=8 RepeatLength=36 seed=TTAGCGGCAT Num.seqs=6  
Similarity=0.856790  
0 TTAGCGGCATTTCCGCCATTGGCTGCGTCGCCTCCG

\*\*\*\*\*  
Consensus:

TTAGCGGCATTTCCGCCATTGGCTGCGTCGCCTCCG

>Bacillus\_Fam\_1626\_36\_1 Nr. of seq. 1 Alignment length(with gaps) = 36  
Alignment score = 0.000000  
GCF\_001636425.1\_ASM163642v1\_genomic.fna\_1:4311548-4311809 Satlength=262  
Nr of Repeats=6 RepeatLength=36 seed=ATCCGGGACA Num.seqs=4

```

Similarity=0.938272
ATCCGGGACATCCAGGGTATGGCGGCATGACTGGTT

*****
Consensus:

ATCCGGGACATCCAGGGTATGGCGGCATGACTGGTT

>Bacillus_Fam_1627_36_1 Nr. of seq. 1 Alignment length(with gaps) = 36
Alignment score = 0.000000
GCF_001645555.1_ASM164555v1_genomic.fna_12:311932-312166 Satlength=235 Nr
of Repeats=7 RepeatLength=36 seed=GTTACTCCCG Num.seqs=6
Similarity=0.911111
GTTACTCCCGGTGATCCCGTTAAACCAGTTGCACCT

*****
Consensus:

GTTACTCCCGGTGATCCCGTTAAACCAGTTGCACCT

>Bacillus_Fam_1628_36_1 Nr. of seq. 1 Alignment length(with gaps) = 36
Alignment score = 0.000000
GCF_001712755.1_ASM171275v1_genomic.fna_35:221909-222269 Satlength=361 Nr
of Repeats=10 RepeatLength=36 seed=TTTCCTGTTG Num.seqs=10
Similarity=0.819753
TTTCCTGTTGATACTGGTGATACTTGCATATTTGGT

*****
Consensus:

TTTCCTGTTGATACTGGTGATACTTGCATATTTGGT

>Bacillus_Fam_1629_36_1 Nr. of seq. 1 Alignment length(with gaps) = 36
Alignment score = 0.000000
GCF_002019645.1_ASM201964v1_genomic.fna_1:2358432-2358672 Satlength=241
Nr of Repeats=6 RepeatLength=36 seed=CAGGAGCACC Num.seqs=4
Similarity=0.962963
CAGGAGCACCGGGAGCAGCAGCTGGA ACTCCATATC

*****
Consensus:

CAGGAGCACCGGGAGCAGCAGCTGGA ACTCCATATC

>Bacillus_Fam_1630_36_1 Nr. of seq. 1 Alignment length(with gaps) = 36
Alignment score = 0.000000
GCF_002019765.1_ASM201976v1_genomic.fna_1:651174-652542 Satlength=1369 Nr
of Repeats=42 RepeatLength=36 seed=AGGAGAAACA Num.seqs=30
Similarity=0.903293
AGGAGAAACAGGGGCGACTGGTAGTCAAGGAGTTCA

*****
Consensus:

```

AGGAGAAACAGGGGCGACTGGTAGTCAAGGAGTTCA

>Bacillus\_Fam\_1631\_36\_1 Nr. of seq. 1 Alignment length(with gaps) = 36  
Alignment score = 0.000000  
GCF\_900098925.1\_PRJEB15625\_genomic.fna\_16:204570-204750 Satlength=181 Nr  
of Repeats=5 RepeatLength=36 seed=GGCATCATTC Num.seqs=5  
Similarity=0.925926  
0 GGCATCATTCCTCGGCATGCCTCCTTGCAATTTGTCCC

\*\*\*\*\*  
Consensus:

GGCATCATTCCTCGGCATGCCTCCTTGCAATTTGTCCC

>Bacillus\_Fam\_1632\_36\_1 Nr. of seq. 1 Alignment length(with gaps) = 36  
Alignment score = 0.000000  
GCF\_900104555.1\_IMG-taxon\_2651870172\_annotated\_assembly\_genomic.fna\_17:0-  
143 Satlength=144 Nr of Repeats=4 RepeatLength=36 seed=CAGGTCCAAA  
Num.seqs=4 Similarity=0.876543 0  
CAGGTCCAAAAGGAAAAGAAGGCCACCCGGTCCAG

\*\*\*\*\*  
Consensus:

CAGGTCCAAAAGGAAAAGAAGGCCACCCGGTCCAG

>Bacillus\_Fam\_1633\_36\_1 Nr. of seq. 1 Alignment length(with gaps) = 36  
Alignment score = 0.000000  
GCF\_900104555.1\_IMG-  
taxon\_2651870172\_annotated\_assembly\_genomic.fna\_20:439434-439668  
Satlength=235 Nr of Repeats=6 RepeatLength=36 seed=CTCCTGGTAC Num.seqs=5  
Similarity=0.881481 0  
CTCCTGGTACTGGATTAAATCCTGGCATGGGTTATG

\*\*\*\*\*  
Consensus:

CTCCTGGTACTGGATTAAATCCTGGCATGGGTTATG

>Bacillus\_Fam\_1634\_34\_1 Nr. of seq. 1 Alignment length(with gaps) = 34  
Alignment score = 0.000000  
GCF\_000752035.1\_Bacillus\_rubiinfantis\_genomic.fna\_11:633923-634127  
Satlength=205 Nr of Repeats=6 RepeatLength=34 seed=AACGTTTGAT Num.seqs=4  
Similarity=0.676698 0  
AACGTTTGATTGACTTCAGCGTTCTACTAACTA

\*\*\*\*\*  
Consensus:

AACGTTTGATTGACTTCAGCGTTCTACTAACTA

>Bacillus\_Fam\_1635\_34\_1 Nr. of seq. 1 Alignment length(with gaps) = 34  
Alignment score = 0.000000

GCF\_900111815.1\_PRJEB17078\_genomic.fna\_1:193561-194089 Satlength=529 Nr of Repeats=4 RepeatLength=34 seed=GGGGGTCAGG Num.seqs=3 Similarity=0.895425

0 GGGGGTCAGGCACGCTTTAATGATTACCGCACT

\*\*\*\*\*

Consensus:

GGGGGTCAGGCACGCTTTAATGATTACCGCACT

>Bacillus\_Fam\_1636\_33\_1 Nr. of seq. 1 Alignment length(with gaps) = 33

Alignment score = 0.000000

BACILLUS\_PSEUDALCALIPHILUS\_genomic.fna\_5:362967-363159 Satlength=193 Nr of Repeats=6 RepeatLength=33 seed=GGAATGATGC Num.seqs=5 Similarity=0.862626

0 GGAATGATGCCAATGCCAGGTCAAAACGGAAAT

\*\*\*\*\*

Consensus:

GGAATGATGCCAATGCCAGGTCAAAACGGAAAT

>Bacillus\_Fam\_1637\_33\_1 Nr. of seq. 1 Alignment length(with gaps) = 33

Alignment score = 0.000000

GCF\_000009825.1\_ASM982v1\_genomic.fna\_1:3221981-3222245 Satlength=265 Nr of Repeats=8 RepeatLength=33 seed=GAACAAGAGC Num.seqs=8 Similarity=0.911977

0 GAACAAGAGCCTGAAACTGACGCTAGCACAGAC

\*\*\*\*\*

Consensus:

GAACAAGAGCCTGAAACTGACGCTAGCACAGAC

>Bacillus\_Fam\_1638\_33\_1 Nr. of seq. 1 Alignment length(with gaps) = 33

Alignment score = 0.000000

GCF\_000380245.2\_ASM38024v2\_genomic.fna\_12:1180413-1180611 Satlength=199 Nr of Repeats=6 RepeatLength=33 seed=AACAAATCCG Num.seqs=6 Similarity=0.973064

AACAAATCCGCCGTCAACAGGAGGAAATGAATC

0

\*\*\*\*\*

Consensus:

AACAAATCCGCCGTCAACAGGAGGAAATGAATC

>Bacillus\_Fam\_1639\_33\_1 Nr. of seq. 1 Alignment length(with gaps) = 33

Alignment score = 0.000000

GCF\_000504145.1\_SOAPdenovo\_for\_version2.04\_of\_Bacillus\_sp.\_FJAT-14515\_genome\_genomic.fna\_1:1765976-1769141 Satlength=3166 Nr of Repeats=101 RepeatLength=33 seed=GGCATGCCTC Num.seqs=70 Similarity=0.84

0 GGCATGCCTCCTTGGTTGACCTCCCAATCCC

\*\*\*\*\*

Consensus:

GGCATGCCTCCACTTG GTTGACCTCCCAATCCC

>Bacillus\_Fam\_1640\_33\_1 Nr. of seq. 1 Alignment length(with gaps) = 33  
Alignment score = 0.000000  
GCF\_000612805.1\_FF3\_genomic.fna\_3:320276-320474 Satlength=199 Nr of  
Repeats=6 RepeatLength=33 seed=TAGAGCATAG Num.seqs=6 Similarity=0.843771  
0 TAGAGCATAGATTAGAAGGCAAAATAGAAGAAC

\*\*\*\*\*  
Consensus:

TAGAGCATAGATTAGAAGGCAAAATAGAAGAAC

>Bacillus\_Fam\_1641\_33\_1 Nr. of seq. 1 Alignment length(with gaps) = 33  
Alignment score = 0.000000  
GCF\_000712615.1\_ASM71261v1\_genomic.fna\_2:456487-456652 Satlength=166 Nr  
of Repeats=5 RepeatLength=33 seed=ATTGTTGGAA Num.seqs=5  
Similarity=0.919192  
0 ATTGTTGGAAGTCTAAGGATAAACATCATTCTG

\*\*\*\*\*  
Consensus:

ATTGTTGGAAGTCTAAGGATAAACATCATTCTG

>Bacillus\_Fam\_1642\_33\_1 Nr. of seq. 1 Alignment length(with gaps) = 33  
Alignment score = 0.000000  
GCF\_000752395.1\_Bacillus\_andreraoultii\_genomic.fna\_56:326201-326366  
Satlength=166 Nr of Repeats=5 RepeatLength=33 seed=CAACTAACAG Num.seqs=5  
Similarity=0.854545 0  
CAACTAACAGAAACGAAAGATAA CTTACAGTCA

\*\*\*\*\*  
Consensus:

CAACTAACAGAAACGAAAGATAA CTTACAGTCA

>Bacillus\_Fam\_1643\_33\_1 Nr. of seq. 1 Alignment length(with gaps) = 33  
Alignment score = 0.000000  
GCF\_000775975.1\_ASM77597v1\_genomic.fna\_1:1324054-1324219 Satlength=166 Nr  
of Repeats=5 RepeatLength=33 seed=ATCAGCATGA Num.seqs=5  
Similarity=0.919192 0  
ATCAGCATGACCTTCTTGCTTAGGAGCAGGGAA

\*\*\*\*\*  
Consensus:

ATCAGCATGACCTTCTTGCTTAGGAGCAGGGAA

>Bacillus\_Fam\_1644\_33\_1 Nr. of seq. 1 Alignment length(with gaps) = 33  
Alignment score = 0.000000

GCF\_000787375.1\_ASM78737v1\_genomic.fna\_14:44934-45126 Satlength=193 Nr of Repeats=5 RepeatLength=33 seed=AAAAGAAGAA Num.seqs=4 Similarity=0.872054  
0 AAAAGAAGAAAGCTTGTCTCGCAGCGAGAAAAGCA

\*\*\*\*\*

Consensus:

AAAAGAAGAAAGCTTGTCTCGCAGCGAGAAAAGCA

>Bacillus\_Fam\_1645\_33\_1 Nr. of seq. 1 Alignment length(with gaps) = 33  
Alignment score = 0.000000

GCF\_001243895.1\_Bacillus\_testis\_genomic.fna\_9:2298830-2299094  
Satlength=265 Nr of Repeats=8 RepeatLength=33 seed=GGTTGGTTTT Num.seqs=8  
Similarity=0.888889 0  
GGTTGGTTTTGTTCTGGTGTGTTGTCCACTTCC

\*\*\*\*\*

Consensus:

GGTTGGTTTTGTTCTGGTGTGTTGTCCACTTCC

>Bacillus\_Fam\_1646\_33\_1 Nr. of seq. 1 Alignment length(with gaps) = 33  
Alignment score = 0.000000

GCF\_001587375.1\_ASM158737v1\_genomic.fna\_152:5556-5678 Satlength=123 Nr of Repeats=4 RepeatLength=33 seed=AGTGTTTAC Num.seqs=3 Similarity=0.688889  
0 AGTGTTTACTAACTTNTTCATCTAATTCAGTT

\*\*\*\*\*

Consensus:

AGTGTTTACTAACTTNTTCATCTAATTCAGTT

>Bacillus\_Fam\_1647\_33\_1 Nr. of seq. 1 Alignment length(with gaps) = 33  
Alignment score = 0.000000

GCF\_001636325.1\_ASM163632v1\_genomic.fna\_2:478165-478297 Satlength=133 Nr of Repeats=4 RepeatLength=33 seed=TAAGTTTGAT Num.seqs=4  
Similarity=0.939394  
0 TAAGTTTGATGGAAAGCTTGAGGATTTAAGCAA

\*\*\*\*\*

Consensus:

TAAGTTTGATGGAAAGCTTGAGGATTTAAGCAA

>Bacillus\_Fam\_1648\_33\_1 Nr. of seq. 1 Alignment length(with gaps) = 33  
Alignment score = 0.000000

GCF\_001636335.1\_ASM163633v1\_genomic.fna\_1:2556735-2556966 Satlength=232  
Nr of Repeats=7 RepeatLength=33 seed=GTAAACCTT Num.seqs=7  
Similarity=0.896104 0  
GTAAACCTTGGTTCATTTCAATTCCTTACTTCC

\*\*\*\*\*

Consensus:

GTAAACCTTGGTTCATTTCAATTTCTTACTTCC

>Bacillus\_Fam\_1649\_33\_1 Nr. of seq. 1 Alignment length(with gaps) = 33  
Alignment score = 0.000000  
GCF\_900094975.1\_IMG-  
taxon\_2617270721\_annotated\_assembly\_genomic.fna\_4:325661-325793  
Satlength=133 Nr of Repeats=4 RepeatLength=33 seed=CTGACGTACA Num.seqs=4  
Similarity=0.684921 0  
CTGACGTACAAGCGGAAATGCAAGAGTTAAGAA

\*\*\*\*\*

Consensus:

CTGACGTACAAGCGGAAATGCAAGAGTTAAGAA

>Bacillus\_Fam\_1650\_33\_1 Nr. of seq. 1 Alignment length(with gaps) = 33  
Alignment score = 0.000000  
GCF\_900156865.1\_PRJEB18960\_genomic.fna\_3:2936055-2936187 Satlength=133 Nr  
of Repeats=4 RepeatLength=33 seed=ATTTTCATCTT Num.seqs=4  
Similarity=0.912458 0  
ATTTTCATCTTTTAAGTCCACTCTCACTACCGAG

\*\*\*\*\*

Consensus:

ATTTTCATCTTTTAAGTCCACTCTCACTACCGAG

>Bacillus\_Fam\_1651\_32\_1 Nr. of seq. 1 Alignment length(with gaps) = 32  
Alignment score = 0.000000  
GCF\_900156865.1\_PRJEB18960\_genomic.fna\_3:759687-760190 Satlength=504 Nr  
of Repeats=16 RepeatLength=32 seed=CAGTTGTACA Num.seqs=10  
Similarity=0.856481 0  
CAGTTGTACAAGAACCCCTGTTTGCCAACCTGT

\*\*\*\*\*

Consensus:

CAGTTGTACAAGAACCCCTGTTTGCCAACCTGT

>Bacillus\_Fam\_1652\_31\_1 Nr. of seq. 1 Alignment length(with gaps) = 31  
Alignment score = 0.000000  
GCF\_000331575.1\_ASM33157v1\_genomic.fna\_4:6822-6946 Satlength=125 Nr of  
Repeats=4 RepeatLength=31 seed=TAGAATATAT Num.seqs=4 Similarity=0.913979  
0 TAGAATATATGAGAAAACGTTAATTCCGTTG

\*\*\*\*\*

Consensus:

TAGAATATATGAGAAAACGTTAATTCCGTTG

>Bacillus\_Fam\_1653\_30\_1 Nr. of seq. 1 Alignment length(with gaps) = 30  
Alignment score = 0.000000



GCF\_000008505.1\_ASM850v1\_genomic.fna\_1:4693242-4693602 Satlength=361 Nr of Repeats=12 RepeatLength=30 seed=GGATCTTCCG Num.seqs=12  
Similarity=0.934680  
GGATCTTCCGTTTCACTTCTGGTTCTTTC

0

\*\*\*\*\*  
Consensus:

GGATCTTCCGTTTCACTTCTGGTTCTTTC

>Bacillus\_Fam\_1654\_30\_1 Nr. of seq. 1 Alignment length(with gaps) = 30  
Alignment score = 0.000000  
GCF\_000025825.1\_ASM2582v1\_genomic.fna\_7:66068-66788 Satlength=721 Nr of Repeats=24 RepeatLength=30 seed=CTTCATCCTA Num.seqs=24  
Similarity=0.882770  
0 CTTCATCCTATCGTGAGGCCGATCTCGAGA

\*\*\*\*\*  
Consensus:

CTTCATCCTATCGTGAGGCCGATCTCGAGA

>Bacillus\_Fam\_1655\_30\_1 Nr. of seq. 1 Alignment length(with gaps) = 30  
Alignment score = 0.000000  
GCF\_000245315.1\_ASM24531v1\_genomic.fna\_45:128844-129054 Satlength=211 Nr of Repeats=6 RepeatLength=30 seed=ATGCAAGGCG Num.seqs=5  
Similarity=0.866667  
0 ATGCAAGGCGGAGGCTACCCGGGCTACGGT

\*\*\*\*\*  
Consensus:

ATGCAAGGCGGAGGCTACCCGGGCTACGGT

>Bacillus\_Fam\_1656\_30\_1 Nr. of seq. 1 Alignment length(with gaps) = 30  
Alignment score = 0.000000  
GCF\_000331575.1\_ASM33157v1\_genomic.fna\_1:32436-32556 Satlength=121 Nr of Repeats=4 RepeatLength=30 seed=ATATTTTCGGT Num.seqs=4 Similarity=0.933333  
0 ATATTTTCGGTTAGCTTTTCAACATAATGGG

\*\*\*\*\*  
Consensus:

ATATTTTCGGTTAGCTTTTCAACATAATGGG

>Bacillus\_Fam\_1657\_30\_1 Nr. of seq. 1 Alignment length(with gaps) = 30  
Alignment score = 0.000000  
GCF\_000429685.1\_ASM42968v1\_genomic.fna\_3:302688-302835 Satlength=148 Nr of Repeats=5 RepeatLength=30 seed=TGCATGCCCT Num.seqs=4  
Similarity=0.933333  
0 TGCATGCCCTGCACATTGTTGGGTGGATAC

\*\*\*\*\*  
Consensus:

TGCATGCCCTGCACATTGTTGGGTGGATAC

>Bacillus\_Fam\_1658\_30\_1 Nr. of seq. 1 Alignment length(with gaps) = 30  
Alignment score = 0.000000  
GCF\_000712615.1\_ASM71261v1\_genomic.fna\_15:76408-77458 Satlength=1051 Nr  
of Repeats=27 RepeatLength=30 seed=TAATCAAAGA Num.seqs=20  
Similarity=0.587214 0  
TAANCAAAGAGCCTATGAGTCCAACAGGAG

\*\*\*\*\*  
Consensus:

TAANCAAAGAGCCTATGAGTCCAACAGGAG

>Bacillus\_Fam\_1659\_30\_1 Nr. of seq. 1 Alignment length(with gaps) = 30  
Alignment score = 0.000000  
GCF\_000712615.1\_ASM71261v1\_genomic.fna\_18:57595-57835 Satlength=241 Nr of  
Repeats=8 RepeatLength=30 seed=TTTTGTCCAT Num.seqs=8 Similarity=0.898413  
0 TTTTGTCCATCCGGCTTCTGCTCTTCTGGA

\*\*\*\*\*  
Consensus:

TTTTGTCCATCCGGCTTCTGCTCTTCTGGA

>Bacillus\_Fam\_1660\_30\_1 Nr. of seq. 1 Alignment length(with gaps) = 30  
Alignment score = 0.000000  
GCF\_000712615.1\_ASM71261v1\_genomic.fna\_26:20583-20787 Satlength=205 Nr of  
Repeats=7 RepeatLength=30 seed=AAGAAAAAAG Num.seqs=6 Similarity=0.896296  
0 AAGAAAAAAGCTGAAGACGACGCAGCAGCC

\*\*\*\*\*  
Consensus:

AAGAAAAAAGCTGAAGACGACGCAGCAGCC

>Bacillus\_Fam\_1661\_30\_1 Nr. of seq. 1 Alignment length(with gaps) = 30  
Alignment score = 0.000000  
GCF\_000832605.1\_ASM83260v1\_genomic.fna\_1:3770138-3770468 Satlength=331 Nr  
of Repeats=11 RepeatLength=30 seed=TTACCTGTTC Num.seqs=11  
Similarity=0.936970 0  
TTACCTGTTCAGGGTCTGGGTTTCCTCCA

\*\*\*\*\*  
Consensus:

TTACCTGTTCAGGGTCTGGGTTTCCTCCA

>Bacillus\_Fam\_1662\_30\_1 Nr. of seq. 1 Alignment length(with gaps) = 30  
Alignment score = 0.000000  
GCF\_000986785.1\_ASM98678v1\_genomic.fna\_16:91585-91696 Satlength=112 Nr of  
Repeats=4 RepeatLength=30 seed=CCAGCCAAGC Num.seqs=3 Similarity=0.911111  
0 CCAGCCAAGCAGCAGCCTGCAGCTCCTGCA

\*\*\*\*\*

Consensus:

CCAGCCAAGCAGCAGCCTGCAGCTCCTGCA

>Bacillus\_Fam\_1663\_30\_1 Nr. of seq. 1 Alignment length(with gaps) = 30  
Alignment score = 0.000000  
GCF\_001273755.1\_ASM127375v1\_genomic.fna\_17:3266495-3266615 Satlength=121  
Nr of Repeats=4 RepeatLength=30 seed=TTTCTTCAG Num.seqs=4  
Similarity=0.711111 0  
TTTCTTCAGCTATTGCTTTGCCTTTGCC

\*\*\*\*\*

Consensus:

TTTCTTCAGCTATTGCTTTGCCTTTGCC

>Bacillus\_Fam\_1664\_30\_1 Nr. of seq. 1 Alignment length(with gaps) = 30  
Alignment score = 0.000000  
GCF\_001273755.1\_ASM127375v1\_genomic.fna\_17:3552762-3553117 Satlength=356  
Nr of Repeats=12 RepeatLength=30 seed=GATGAGCTTT Num.seqs=11  
Similarity=0.772121 0  
GATGAGCTTTCTGTTGTACTACTTTCNTCT

\*\*\*\*\*

Consensus:

GATGAGCTTTCTGTTGTACTACTTTCNTCT

>Bacillus\_Fam\_1665\_30\_1 Nr. of seq. 1 Alignment length(with gaps) = 30  
Alignment score = 0.000000  
GCF\_001315065.1\_ASM131506v1\_genomic.fna\_25:60788-60956 Satlength=169 Nr  
of Repeats=5 RepeatLength=30 seed=GAGGAAGATC Num.seqs=3  
Similarity=0.970370  
0 GAGGAAGATCACGATCACGAACATGGACAT

\*\*\*\*\*

Consensus:

GAGGAAGATCACGATCACGAACATGGACAT

>Bacillus\_Fam\_1666\_30\_1 Nr. of seq. 1 Alignment length(with gaps) = 30  
Alignment score = 0.000000  
GCF\_001578185.1\_ASM157818v1\_genomic.fna\_1:1359899-1360049 Satlength=151  
Nr of Repeats=4 RepeatLength=30 seed=TATGGCGGTC Num.seqs=3  
Similarity=0.881481 0  
TATGGCGGTCATTCTGGATATGGTATGGGC

\*\*\*\*\*

Consensus:

TATGGCGGTCATTCTGGATATGGTATGGGC

>Bacillus\_Fam\_1667\_30\_1 Nr. of seq. 1 Alignment length(with gaps) = 30  
Alignment score = 0.000000  
GCF\_001591585.1\_ASM159158v1\_genomic.fna\_4:226-586 Satlength=361 Nr of  
Repeats=11 RepeatLength=30 seed=CTTGTTTCGC Num.seqs=10  
Similarity=0.853827  
0 CTTGTTTCGCTTTTTCCTTCACTAATGCTG

\*\*\*\*\*

Consensus:

CTTGTTTCGCTTTTTCCTTCACTAATGCTG

>Bacillus\_Fam\_1668\_30\_1 Nr. of seq. 1 Alignment length(with gaps) = 30  
Alignment score = 0.000000  
GCF\_001591625.1\_ASM159162v1\_genomic.fna\_70:12964-13156 Satlength=193 Nr  
of Repeats=5 RepeatLength=30 seed=CACCATTGTC Num.seqs=4  
Similarity=0.874074  
0 CACCATTGTCATGATGGACATAAACCTTGC

\*\*\*\*\*

Consensus:

CACCATTGTCATGATGGACATAAACCTTGC

>Bacillus\_Fam\_1669\_30\_1 Nr. of seq. 1 Alignment length(with gaps) = 30  
Alignment score = 0.000000  
GCF\_001645685.2\_ASM164568v2\_genomic.fna\_1:3346551-3346701 Satlength=151  
Nr of Repeats=5 RepeatLength=30 seed=TCTTTGATCG Num.seqs=5  
Similarity=0.776344  
TCTTTGATCGGTGCNTGATACTTCGGCTGT 0

\*\*\*\*\*

Consensus:

TCTTTGATCGGTGCNTGATACTTCGGCTGT

>Bacillus\_Fam\_1670\_30\_1 Nr. of seq. 1 Alignment length(with gaps) = 30  
Alignment score = 0.000000  
GCF\_001742425.1\_ASM174242v1\_genomic.fna\_11:173420-173555 Satlength=136 Nr  
of Repeats=5 RepeatLength=30 seed=TACTACTTCT Num.seqs=4  
Similarity=0.948148  
TACTACTTCTTCAGCTGCCGCTTCTTCAGT 0

\*\*\*\*\*

Consensus:

TACTACTTCTTCAGCTGCCGCTTCTTCAGT

>Bacillus\_Fam\_1671\_30\_1 Nr. of seq. 1 Alignment length(with gaps) = 30  
Alignment score = 0.000000  
GCF\_002019595.1\_ASM201959v1\_genomic.fna\_1:1449566-1449722 Satlength=157  
Nr of Repeats=5 RepeatLength=30 seed=CCAGGACCAG Num.seqs=4  
Similarity=0.955556  
CCAGGACCAGGCATGATGCCAGGAGGAATG 0

\*\*\*\*\*

Consensus:

CCAGGACCAGGCATGATGCCAGGAGGAATG

>Bacillus\_Fam\_1672\_30\_1 Nr. of seq. 1 Alignment length(with gaps) = 30  
Alignment score = 0.000000  
GCF\_900156865.1\_PRJEB18960\_genomic.fna\_3:1860072-1860222 Satlength=151 Nr  
of Repeats=5 RepeatLength=30 seed=CCACCTTGTG Num.seqs=5  
Similarity=0.763441 0  
CCACCTTGTGTTGCTTTGGCTGCTGTGCT

\*\*\*\*\*

Consensus:

CCACCTTGTGTTGCTTTGGCTGCTGTGCT

>Bacillus\_Fam\_1673\_29\_1 Nr. of seq. 1 Alignment length(with gaps) = 29  
Alignment score = 0.000000  
GCF\_000331575.1\_ASM33157v1\_genomic.fna\_4:32194-32368 Satlength=175 Nr of  
Repeats=6 RepeatLength=29 seed=TTGCGGTAAT Num.seqs=6 Similarity=0.898851  
0 TTGCGGTAATAAACTTCTAATACCCCTT

\*\*\*\*\*

Consensus:

TTGCGGTAATAAACTTCTAATACCCCTT

>Bacillus\_Fam\_1674\_28\_1 Nr. of seq. 1 Alignment length(with gaps) = 28  
Alignment score = 0.000000  
GCF\_001636335.1\_ASM163633v1\_genomic.fna\_1:2184233-2184341 Satlength=109  
Nr of Repeats=4 RepeatLength=27 seed=TTGGCATTA Num.seqs=4  
Similarity=0.769841 0  
TTGGCATTAACGGCATTGATTTGCGN

\*\*\*\*\*

Consensus:

TTGGCATTAACGGCATTGATTTGCGN

>Bacillus\_Fam\_1675\_28\_1 Nr. of seq. 1 Alignment length(with gaps) = 28  
Alignment score = 0.000000  
GCF\_002019705.1\_ASM201970v1\_genomic.fna\_1:3847148-3847274 Satlength=127  
Nr of Repeats=6 RepeatLength=27 seed=CCAGTAACGC Num.seqs=4  
Similarity=0.714286 0  
CCAGTAACGCCAGTAACACCTGTNTAAG

\*\*\*\*\*

Consensus:

CCAGTAACGCCAGTAACACCTGTNTAAG

>Bacillus\_Fam\_1676\_27\_1 Nr. of seq. 1 Alignment length(with gaps) = 27  
Alignment score = 0.000000  
BACILLUS\_PSEUDALCALIPHILUS\_genomic.fna\_2:129576-130332 Satlength=757 Nr of  
Repeats=20 RepeatLength=27 seed=GGACCAACAG Num.seqs=15  
Similarity=0.854203 0  
GGACCAACAGGNGAGCAAGGGATCCAA

\*\*\*\*\*  
Consensus:

GGACCAACAGGNGAGCAAGGGATCCAA

>Bacillus\_Fam\_1677\_27\_1 Nr. of seq. 1 Alignment length(with gaps) = 27  
Alignment score = 0.000000  
GCF\_000177235.2\_ASM17723v2\_genomic.fna\_1:1354085-1354274 Satlength=190 Nr  
of Repeats=7 RepeatLength=27 seed=GGAGATGACG Num.seqs=5  
Similarity=0.695556 0  
GGAGATGACGGCGAAACNCCAGGCACA

\*\*\*\*\*  
Consensus:

GGAGATGACGGCGAAACNCCAGGCACA

>Bacillus\_Fam\_1678\_27\_1 Nr. of seq. 1 Alignment length(with gaps) = 27  
Alignment score = 0.000000  
GCF\_000504145.1\_SOAPdenovo\_for\_version2.04\_of\_Bacillus\_sp.\_FJAT-  
14515\_genome\_genomic.fna\_27:57375-57516 Satlength=142 Nr of Repeats=5  
RepeatLength=27 seed=CCACCATATC Num.seqs=3 Similarity=0.769547 0  
CCACCATATCCATGATGGTACGGGTAA

\*\*\*\*\*  
Consensus:

CCACCATATCCATGATGGTACGGGTAA

>Bacillus\_Fam\_1679\_27\_1 Nr. of seq. 1 Alignment length(with gaps) = 27  
Alignment score = 0.000000  
GCF\_000507145.1\_KCTC\_13622\_01\_genomic.fna\_39:156813-156975 Satlength=163  
Nr of Repeats=6 RepeatLength=27 seed=CCATACATGC Num.seqs=6  
Similarity=0.947325 0  
CCATACATGCCGGATCCTGGGAAACCC

\*\*\*\*\*  
Consensus:

CCATACATGCCGGATCCTGGGAAACCC

>Bacillus\_Fam\_1680\_27\_1 Nr. of seq. 1 Alignment length(with gaps) = 27  
Alignment score = 0.000000  
GCF\_000621445.1\_ASM62144v1\_genomic.fna\_1:408565-408724 Satlength=160 Nr  
of Repeats=6 RepeatLength=27 seed=TCTTCTTCTC Num.seqs=5  
Similarity=0.841667  
0 TCTTCTTCTCCTCCCGGTGGCAACTCT

\*\*\*\*\*

Consensus:

TCTTCTTCTCCTCCCGGTGGCAACTCT

>Bacillus\_Fam\_1681\_27\_1 Nr. of seq. 1 Alignment length(with gaps) = 27

Alignment score = 0.000000

GCF\_000712615.1\_ASM71261v1\_genomic.fna\_26:13505-13964 Satlength=460 Nr of

Repeats=17 RepeatLength=27 seed=CCTGGTCCGA Num.seqs=17

Similarity=1.000000

0 CCTGGTCCGAATGGAGATACGTTTGGC

\*\*\*\*\*

Consensus:

CCTGGTCCGAATGGAGATACGTTTGGC

>Bacillus\_Fam\_1682\_27\_1 Nr. of seq. 1 Alignment length(with gaps) = 27

Alignment score = 0.000000

GCF\_000829555.1\_ASM82955v1\_genomic.fna\_1:540159-540303 Satlength=145 Nr

of Repeats=6 RepeatLength=27 seed=CCCGGTTCTC Num.seqs=4

Similarity=0.917695

0 CCCGGTTCTCCTGGCTCTCCCGTTTA

\*\*\*\*\*

Consensus:

CCCGGTTCTCCTGGCTCTCCCGTTTA

>Bacillus\_Fam\_1683\_27\_1 Nr. of seq. 1 Alignment length(with gaps) = 27

Alignment score = 0.000000

GCF\_001274775.1\_ASM127477v1\_genomic.fna\_3:360890-361097 Satlength=208 Nr

of Repeats=9 RepeatLength=27 seed=CACAGGGGCC Num.seqs=7

Similarity=0.727219

0 CACAGGGGCCACAAGGGTTGACGGGN

\*\*\*\*\*

Consensus:

CACAGGGGCCACAAGGGTTGACGGGN

>Bacillus\_Fam\_1684\_27\_1 Nr. of seq. 1 Alignment length(with gaps) = 27

Alignment score = 0.000000

GCF\_001315065.1\_ASM131506v1\_genomic.fna\_30:1799-1955 Satlength=157 Nr of

Repeats=6 RepeatLength=27 seed=CCAGAGCCTC Num.seqs=5 Similarity=0.930864

0 CCAGAGCCTCCTTCTCCGTCTCCAGTG

\*\*\*\*\*

Consensus:

CCAGAGCCTCCTTCTCCGTCTCCAGTG

>Bacillus\_Fam\_1685\_27\_1 Nr. of seq. 1 Alignment length(with gaps) = 27  
Alignment score = 0.000000  
GCF\_001439635.1\_ASM143963v1\_genomic.fna\_165:21253-21388 Satlength=136 Nr  
of Repeats=4 RepeatLength=27 seed=TTTCTGAAAT Num.seqs=3  
Similarity=0.595238  
0 TTTCTGAAATTGCTNCCACTTCTTGAN

\*\*\*\*\*

Consensus:

TTTCTGAAATTGCTNCCACTTCTTGAN

>Bacillus\_Fam\_1686\_27\_1 Nr. of seq. 1 Alignment length(with gaps) = 27  
Alignment score = 0.000000  
GCF\_001578185.1\_ASM157818v1\_genomic.fna\_1:2745149-2745257 Satlength=109  
Nr of Repeats=6 RepeatLength=27 seed=TGAAGCTGTT Num.seqs=4  
Similarity=0.909465 0  
TGAAGCTGTTGAAGCTGTTGATGCTCT

\*\*\*\*\*

Consensus:

TGAAGCTGTTGAAGCTGTTGATGCTCT

>Bacillus\_Fam\_1687\_27\_1 Nr. of seq. 1 Alignment length(with gaps) = 27  
Alignment score = 0.000000  
GCF\_001591625.1\_ASM159162v1\_genomic.fna\_178:4262-4433 Satlength=172 Nr of  
Repeats=6 RepeatLength=27 seed=GAGGTCCTTG Num.seqs=4 Similarity=0.901235  
0 GAGGTCCTTGAGGCCAGTTGCTCCCT

\*\*\*\*\*

Consensus:

GAGGTCCTTGAGGCCAGTTGCTCCCT

>Bacillus\_Fam\_1688\_27\_1 Nr. of seq. 1 Alignment length(with gaps) = 27  
Alignment score = 0.000000  
GCF\_001636325.1\_ASM163632v1\_genomic.fna\_2:1328784-1328973 Satlength=190  
Nr of Repeats=7 RepeatLength=27 seed=AGCAAAAACC Num.seqs=5  
Similarity=0.743210 0  
AGCAAAAACCGTTGCAGCCTATTCAAC

\*\*\*\*\*

Consensus:

AGCAAAAACCGTTGCAGCCTATTCAAC

>Bacillus\_Fam\_1689\_27\_1 Nr. of seq. 1 Alignment length(with gaps) = 27  
Alignment score = 0.000000  
GCF\_001636425.1\_ASM163642v1\_genomic.fna\_2:151590-151686 Satlength=97 Nr  
of Repeats=4 RepeatLength=27 seed=GGTTCTACTG Num.seqs=3  
Similarity=0.934156  
0 GGTTCTACTGGTTCAACAGGAACATCA



\*\*\*\*\*

Consensus:

GGTTCTACTGGTTCAACAGGAACATCA

>Bacillus\_Fam\_1690\_27\_1 Nr. of seq. 1 Alignment length(with gaps) = 27  
Alignment score = 0.000000  
GCF\_001645685.2\_ASM164568v2\_genomic.fna\_1:3248002-3248306 Satlength=305  
Nr of Repeats=10 RepeatLength=27 seed=AACTGCTTGA Num.seqs=9  
Similarity=0.950617 0  
AACTGCTTGATGAGCTCTCGCATGAGG

\*\*\*\*\*

Consensus:

AACTGCTTGATGAGCTCTCGCATGAGG

>Bacillus\_Fam\_1691\_27\_1 Nr. of seq. 1 Alignment length(with gaps) = 27  
Alignment score = 0.000000  
GCF\_001648575.1\_ASM164857v1\_genomic.fna\_8:6481-6859 Satlength=379 Nr of  
Repeats=13 RepeatLength=27 seed=CCTTCTGGTC Num.seqs=12  
Similarity=0.976057  
0 CCTTCTGGTCCCGCTGGTCCTATTGCT

\*\*\*\*\*

Consensus:

CCTTCTGGTCCCGCTGGTCCTATTGCT

>Bacillus\_Fam\_1692\_27\_1 Nr. of seq. 1 Alignment length(with gaps) = 27  
Alignment score = 0.000000  
GCF\_001712755.1\_ASM171275v1\_genomic.fna\_36:39981-40521 Satlength=541 Nr  
of Repeats=20 RepeatLength=27 seed=CCTGCATTTC Num.seqs=20  
Similarity=0.893437 0  
CCTGCATTTCCTGTTCTTTCTGCTCTG

\*\*\*\*\*

Consensus:

CCTGCATTTCCTGTTCTTTCTGCTCTG

>Bacillus\_Fam\_1693\_27\_1 Nr. of seq. 1 Alignment length(with gaps) = 27  
Alignment score = 0.000000  
GCF\_001887185.1\_ASM188718v1\_genomic.fna\_197:67384-67492 Satlength=109 Nr  
of Repeats=4 RepeatLength=27 seed=GCCAATTTTA Num.seqs=4  
Similarity=0.975309  
0 GCCAATTTTACTAGGTAAAATTCTACT

\*\*\*\*\*

Consensus:

GCCAATTTTACTAGGTAAAATTCTACT

>Bacillus\_Fam\_1694\_27\_1 Nr. of seq. 1 Alignment length(with gaps) = 27  
Alignment score = 0.000000  
GCF\_002019605.1\_ASM201960v1\_genomic.fna\_1:2443028-2443136 Satlength=109  
Nr of Repeats=4 RepeatLength=27 seed=TCATGTCCAT Num.seqs=4  
Similarity=0.942387 0  
TCATGTCCATGCTCTTCATGCTCGTGA

\*\*\*\*\*

Consensus:

TCATGTCCATGCTCTTCATGCTCGTGA

>Bacillus\_Fam\_1695\_26\_1 Nr. of seq. 1 Alignment length(with gaps) = 26  
Alignment score = 0.000000  
GCF\_001877785.1\_PlanoSAMM\_genomic.fna\_128:141796-141971 Satlength=176 Nr  
of Repeats=7 RepeatLength=25 seed=TGTACCAGGT Num.seqs=7  
Similarity=0.567460  
0 TGTACCAGGTACAANACCNCAACTNN

\*\*\*\*\*

Consensus:

TGTACCAGGTACAANACCNCAACTNN

>Bacillus\_Fam\_1696\_25\_1 Nr. of seq. 1 Alignment length(with gaps) = 25  
Alignment score = 0.000000  
GCF\_000331575.1\_ASM33157v1\_genomic.fna\_4:37610-37783 Satlength=174 Nr of  
Repeats=7 RepeatLength=25 seed=TACTACCCTA Num.seqs=5 Similarity=0.957333  
0 TACTACCCTATGGTAAAATATGTAA

\*\*\*\*\*

Consensus:

TACTACCCTATGGTAAAATATGTAA

>Bacillus\_Fam\_1697\_25\_1 Nr. of seq. 1 Alignment length(with gaps) = 25  
Alignment score = 0.000000  
GCF\_001877785.1\_PlanoSAMM\_genomic.fna\_117:71061-71186 Satlength=126 Nr of  
Repeats=5 RepeatLength=25 seed=TGTACCTGGT Num.seqs=5 Similarity=0.553086  
0 TGTACCTGGTACATGANCCNGTNNT

\*\*\*\*\*

Consensus:

TGTACCTGGTACATGANCCNGTNNT

>Bacillus\_Fam\_1698\_24\_1 Nr. of seq. 1 Alignment length(with gaps) = 24  
Alignment score = 0.000000  
GCF\_000161455.1\_ASM16145v1\_genomic.fna\_1:1443980-1444148 Satlength=169 Nr  
of Repeats=7 RepeatLength=24 seed=TGGAGTTGGA Num.seqs=7  
Similarity=1.000000 0  
TGGAGTTGGAGGATTCGGCGGACC

\*\*\*\*\*

Consensus:

TGGAGTTGGAGGATTCGGCGGACC

>Bacillus\_Fam\_1699\_24\_1 Nr. of seq. 1 Alignment length(with gaps) = 24  
Alignment score = 0.000000  
GCF\_000186125.1\_Bacillus\_BT1B\_CT2\_V1\_genomic.fna\_1:1895116-1895212  
Satlength=97 Nr of Repeats=4 RepeatLength=24 seed=GGGACACAGC Num.seqs=4  
Similarity=0.826923 0  
GGGACACAGCTGTTGGAGCTGTGC

\*\*\*\*\*

Consensus:

GGGACACAGCTGTTGGAGCTGTGC

>Bacillus\_Fam\_1700\_24\_1 Nr. of seq. 1 Alignment length(with gaps) = 24  
Alignment score = 0.000000  
GCF\_000245335.1\_ASM24533v1\_genomic.fna\_8:553929-554097 Satlength=169 Nr  
of Repeats=7 RepeatLength=24 seed=CCTCCGCCAA Num.seqs=7  
Similarity=0.756614  
0 CCTCCGCCAATACCAGGCACGGCG

\*\*\*\*\*

Consensus:

CCTCCGCCAATACCAGGCACGGCG

>Bacillus\_Fam\_1701\_24\_1 Nr. of seq. 1 Alignment length(with gaps) = 24  
Alignment score = 0.000000  
GCF\_000307855.1\_BAZO1.0\_genomic.fna\_16:13575-13719 Satlength=145 Nr of  
Repeats=6 RepeatLength=24 seed=GGAGGATTTT Num.seqs=6 Similarity=0.900000  
0 GGAGGATTTTGCGCAGGCAGGTGC

\*\*\*\*\*

Consensus:

GGAGGATTTTGCGCAGGCAGGTGC

>Bacillus\_Fam\_1702\_24\_1 Nr. of seq. 1 Alignment length(with gaps) = 24  
Alignment score = 0.000000  
GCF\_000331575.1\_ASM33157v1\_genomic.fna\_1:75628-75724 Satlength=97 Nr of  
Repeats=4 RepeatLength=24 seed=ACTGTTTTTC Num.seqs=4 Similarity=0.907407  
0 ACTGTTTTTCGTTCTGCTATTTAC

\*\*\*\*\*

Consensus:

ACTGTTTTTCGTTCTGCTATTTAC

>Bacillus\_Fam\_1703\_24\_1 Nr. of seq. 1 Alignment length(with gaps) = 24  
Alignment score = 0.000000  
GCF\_000331575.1\_ASM33157v1\_genomic.fna\_3:126837-127053 Satlength=217 Nr  
of Repeats=9 RepeatLength=24 seed=GACCAAAACA Num.seqs=9

Similarity=0.833333  
0 GACCAAAACACAATACAGAAGTTG

\*\*\*\*\*  
Consensus:

GACCAAAACACAATACAGAAGTTG

>Bacillus\_Fam\_1704\_24\_1 Nr. of seq. 1 Alignment length(with gaps) = 24  
Alignment score = 0.000000  
GCF\_000374565.1\_ASM37456v1\_genomic.fna\_6:153087-153207 Satlength=121 Nr  
of Repeats=5 RepeatLength=24 seed=CCGGGTGAAG Num.seqs=5  
Similarity=0.922222  
0 CCGGGTGAAGGGCCAGGAGAAAAC

\*\*\*\*\*  
Consensus:

CCGGGTGAAGGGCCAGGAGAAAAC

>Bacillus\_Fam\_1705\_24\_1 Nr. of seq. 1 Alignment length(with gaps) = 24  
Alignment score = 0.000000  
GCF\_000496285.1\_ASM49628v1\_genomic.fna\_1:3406349-3406469 Satlength=121 Nr  
of Repeats=5 RepeatLength=24 seed=AGTGTCTTTT Num.seqs=5  
Similarity=0.922222  
AGTGTCTTTTGTTCCTCTCAGAGTT 0

\*\*\*\*\*  
Consensus:

AGTGTCTTTTGTTCCTCTCAGAGTT

>Bacillus\_Fam\_1706\_24\_1 Nr. of seq. 1 Alignment length(with gaps) = 24  
Alignment score = 0.000000  
GCF\_000504145.1\_SOAPdenovo\_for\_version2.04\_of\_Bacillus\_sp.\_FJAT-  
14515\_genome\_genomic.fna\_1:918376-919127 Satlength=752 Nr of Repeats=28  
RepeatLength=24 seed=TCGGCACTTT Num.seqs=18 Similarity=0.714597 0  
TCGGCACTTTCATCTNCACTTTTCG

\*\*\*\*\*  
Consensus:

TCGGCACTTTCATCTNCACTTTTCG

>Bacillus\_Fam\_1707\_24\_1 Nr. of seq. 1 Alignment length(with gaps) = 24  
Alignment score = 0.000000  
GCF\_000612625.1\_JCE\_genomic.fna\_19:40197-40437 Satlength=241 Nr of  
Repeats=10 RepeatLength=24 seed=TCCTCCAGTG Num.seqs=10  
Similarity=0.944444  
0 TCCTCCAGTGCTGCCTCCGTTGTC

\*\*\*\*\*  
Consensus:

TCCTCCAGTGCTGCCTCCGTTGTC

>Bacillus\_Fam\_1708\_24\_1 Nr. of seq. 1 Alignment length(with gaps) = 24  
Alignment score = 0.000000  
GCF\_000712595.1\_ASM71259v1\_genomic.fna\_3:200804-201365 Satlength=562 Nr  
of Repeats=23 RepeatLength=24 seed=TTACCTTGGC Num.seqs=20  
Similarity=0.994444  
TTACCTTGGCCACCACCTTGGTCG

0

\*\*\*\*\*  
Consensus:

TTACCTTGGCCACCACCTTGGTCG

>Bacillus\_Fam\_1709\_24\_1 Nr. of seq. 1 Alignment length(with gaps) = 24  
Alignment score = 0.000000  
GCF\_000712595.1\_ASM71259v1\_genomic.fna\_14:27323-27635 Satlength=313 Nr of  
Repeats=13 RepeatLength=24 seed=TTGTACTTGC Num.seqs=13  
Similarity=0.921652  
0 TTGTACTTGCTCCTGCACCGGCTC

\*\*\*\*\*  
Consensus:

TTGTACTTGCTCCTGCACCGGCTC

>Bacillus\_Fam\_1710\_24\_1 Nr. of seq. 1 Alignment length(with gaps) = 24  
Alignment score = 0.000000  
GCF\_000712615.1\_ASM71261v1\_genomic.fna\_12:99179-99620 Satlength=442 Nr of  
Repeats=18 RepeatLength=24 seed=CCATGATGAT Num.seqs=17  
Similarity=1.000000  
0 CCATGATGATTGTGATGGTGTCCG

\*\*\*\*\*  
Consensus:

CCATGATGATTGTGATGGTGTCCG

>Bacillus\_Fam\_1711\_24\_1 Nr. of seq. 1 Alignment length(with gaps) = 24  
Alignment score = 0.000000  
GCF\_000724485.1\_ASM72448v1\_genomic.fna\_1:2088487-2088577 Satlength=91 Nr  
of Repeats=4 RepeatLength=24 seed=CCTGGTCCAT Num.seqs=3  
Similarity=0.962963  
0 CCTGGTCCATAACCAGGGCCCATA

\*\*\*\*\*  
Consensus:

CCTGGTCCATAACCAGGGCCCATA

>Bacillus\_Fam\_1712\_24\_1 Nr. of seq. 1 Alignment length(with gaps) = 24  
Alignment score = 0.000000

GCF\_000724485.1\_ASM72448v1\_genomic.fna\_1:2102157-2102379 Satlength=223 Nr  
of Repeats=8 RepeatLength=24 seed=CGGTACTGGC Num.seqs=7  
Similarity=0.915344 0  
CGGTACTGGCGCCGGTGGCAACGG

\*\*\*\*\*

Consensus:

CGGTACTGGCGCCGGTGGCAACGG

>Bacillus\_Fam\_1713\_24\_1 Nr. of seq. 1 Alignment length(with gaps) = 24  
Alignment score = 0.000000  
GCF\_000775975.1\_ASM77597v1\_genomic.fna\_1:3273312-3273480 Satlength=169 Nr  
of Repeats=6 RepeatLength=24 seed=TGATTCATAT Num.seqs=5  
Similarity=0.777778 0  
TGATTCATATGCGCTTGTTGCGGC

\*\*\*\*\*

Consensus:

TGATTCATATGCGCTTGTTGCGGC

>Bacillus\_Fam\_1714\_24\_1 Nr. of seq. 1 Alignment length(with gaps) = 24  
Alignment score = 0.000000  
GCF\_001274935.1\_ASM127493v1\_genomic.fna\_1:6173-6293 Satlength=121 Nr of  
Repeats=5 RepeatLength=24 seed=GGTGGCGTTG Num.seqs=5 Similarity=0.866667  
0 GGTGGCGTTGTACCTCCATCTCCG

\*\*\*\*\*

Consensus:

GGTGGCGTTGTACCTCCATCTCCG

>Bacillus\_Fam\_1715\_24\_1 Nr. of seq. 1 Alignment length(with gaps) = 24  
Alignment score = 0.000000  
GCF\_001420595.1\_ASM142059v1\_genomic.fna\_11:3031878-3031998 Satlength=121  
Nr of Repeats=5 RepeatLength=24 seed=GTTTGTGCTG Num.seqs=5  
Similarity=0.933333 0  
GTTTGTGCTGGCTTTTGAGTCTGA

\*\*\*\*\*

Consensus:

GTTTGTGCTGGCTTTTGAGTCTGA

>Bacillus\_Fam\_1716\_24\_1 Nr. of seq. 1 Alignment length(with gaps) = 24  
Alignment score = 0.000000  
GCF\_001420715.1\_ASM142071v1\_genomic.fna\_22:560318-560419 Satlength=102 Nr  
of Repeats=5 RepeatLength=20 seed=GGCTAATAGA Num.seqs=4  
Similarity=0.528935 0  
GGCTAATAGANCGAAAGTGATAAC

\*\*\*\*\*

Consensus:

GGCTAATAGANCGAAAGTGATAAC

>Bacillus\_Fam\_1717\_24\_1 Nr. of seq. 1 Alignment length(with gaps) = 24  
Alignment score = 0.000000  
GCF\_001578185.1\_ASM157818v1\_genomic.fna\_1:4072028-4072112 Satlength=85 Nr  
of Repeats=4 RepeatLength=21 seed=TTCACGAGTA Num.seqs=4  
Similarity=0.583333 0  
TTCACGAGTAAATGACCCAATNAN

\*\*\*\*\*  
Consensus:

TTCACGAGTAAATGACCCAATNAN

>Bacillus\_Fam\_1718\_24\_1 Nr. of seq. 1 Alignment length(with gaps) = 24  
Alignment score = 0.000000  
GCF\_001591445.1\_ASM159144v1\_genomic.fna\_22:102672-102756 Satlength=85 Nr  
of Repeats=4 RepeatLength=21 seed=ATTCCGCCAA Num.seqs=4  
Similarity=0.546296  
0 ATTCCGCCAACTATTGGAGTTNGG

\*\*\*\*\*  
Consensus:

ATTCCGCCAACTATTGGAGTTNGG

>Bacillus\_Fam\_1719\_24\_1 Nr. of seq. 1 Alignment length(with gaps) = 24  
Alignment score = 0.000000  
GCF\_001591585.1\_ASM159158v1\_genomic.fna\_10:33080-33226 Satlength=147 Nr  
of Repeats=7 RepeatLength=21 seed=ATATCAGCCA Num.seqs=6  
Similarity=0.616204  
0 ATATCAGCCAANGTAACGGGGAGC

\*\*\*\*\*  
Consensus:

ATATCAGCCAANGTAACGGGGAGC

>Bacillus\_Fam\_1720\_24\_1 Nr. of seq. 1 Alignment length(with gaps) = 24  
Alignment score = 0.000000  
GCF\_001636315.1\_ASM163631v1\_genomic.fna\_1:5656908-5657010 Satlength=103  
Nr of Repeats=5 RepeatLength=24 seed=TTTCAATTTC Num.seqs=3  
Similarity=0.925926 0  
TTTCAATTTC AATTCGTCTTCTTC

\*\*\*\*\*  
Consensus:

TTTCAATTTC AATTCGTCTTCTTC

>Bacillus\_Fam\_1721\_24\_1 Nr. of seq. 1 Alignment length(with gaps) = 24  
Alignment score = 0.000000

GCF\_001645685.2\_ASM164568v2\_genomic.fna\_1:664949-665049 Satlength=101 Nr  
of Repeats=4 RepeatLength=24 seed=TTGCAGTACG Num.seqs=3  
Similarity=0.962963  
0 TTGCAGTACGCTAGAGTACTCCAG

\*\*\*\*\*

Consensus:

TTGCAGTACGCTAGAGTACTCCAG

>Bacillus\_Fam\_1722\_24\_1 Nr. of seq. 1 Alignment length(with gaps) = 24  
Alignment score = 0.000000  
GCF\_001654695.1\_ASM165469v1\_genomic.fna\_23:346230-346323 Satlength=94 Nr  
of Repeats=4 RepeatLength=24 seed=GAAAAACAGC Num.seqs=3  
Similarity=0.888889  
0 GAAAAACAGCCTGCAACAGAAGAA

\*\*\*\*\*

Consensus:

GAAAAACAGCCTGCAACAGAAGAA

>Bacillus\_Fam\_1723\_24\_1 Nr. of seq. 1 Alignment length(with gaps) = 24  
Alignment score = 0.000000  
GCF\_001654695.1\_ASM165469v1\_genomic.fna\_34:84196-84424 Satlength=229 Nr  
of Repeats=6 RepeatLength=21 seed=TGGTTCAATC Num.seqs=4  
Similarity=0.527778  
0 TGGTTCAATCNCCTCGNTCTTCAA

\*\*\*\*\*

Consensus:

TGGTTCAATCNCCTCGNTCTTCAA

>Bacillus\_Fam\_1724\_24\_1 Nr. of seq. 1 Alignment length(with gaps) = 24  
Alignment score = 0.000000  
GCF\_001712755.1\_ASM171275v1\_genomic.fna\_1:111413-111521 Satlength=109 Nr  
of Repeats=5 RepeatLength=24 seed=GTGCCGTCAC Num.seqs=3  
Similarity=0.925926  
0 GTGCCGTCACCAGTACCAGTACCC

\*\*\*\*\*

Consensus:

GTGCCGTCACCAGTACCAGTACCC

>Bacillus\_Fam\_1725\_24\_1 Nr. of seq. 1 Alignment length(with gaps) = 24  
Alignment score = 0.000000  
GCF\_001742425.1\_ASM174242v1\_genomic.fna\_18:1219-1339 Satlength=121 Nr of  
Repeats=5 RepeatLength=24 seed=GAAGAACCAA Num.seqs=5 Similarity=0.772222  
0 GAAGAACCAACAACAGAACAACCT

\*\*\*\*\*

Consensus:



GAAGAACCAACAACAGAACAACCT

>Bacillus\_Fam\_1726\_24\_1 Nr. of seq. 1 Alignment length(with gaps) = 24  
Alignment score = 0.000000  
GCF\_001742425.1\_ASM174242v1\_genomic.fna\_33:4678-4870 Satlength=193 Nr of  
Repeats=8 RepeatLength=24 seed=AAACCAAGTG Num.seqs=8 Similarity=0.847222  
0 AAACCAAGTGAAATAGACGAGACA

\*\*\*\*\*  
Consensus:

AAACCAAGTGAAATAGACGAGACA

>Bacillus\_Fam\_1727\_24\_1 Nr. of seq. 1 Alignment length(with gaps) = 24  
Alignment score = 0.000000  
GCF\_002019665.1\_ASM201966v1\_genomic.fna\_1:4130416-4130536 Satlength=121  
Nr of Repeats=5 RepeatLength=24 seed=TTATTACCTG Num.seqs=5  
Similarity=0.855556 0  
TTATTACCTGGTTTCTCGCCCGGT

\*\*\*\*\*  
Consensus:

TTATTACCTGGTTTCTCGCCCGGT

>Bacillus\_Fam\_1728\_24\_1 Nr. of seq. 1 Alignment length(with gaps) = 24  
Alignment score = 0.000000  
GCF\_900109925.1\_IMG-  
taxon\_2651870116\_annotated\_assembly\_genomic.fna\_23:96772-97084  
Satlength=313 Nr of Repeats=13 RepeatLength=24 seed=CGACCATCAG  
Num.seqs=13 Similarity=0.881054 0  
CGACCATCAGGTCAAGGCCAACAA

\*\*\*\*\*  
Consensus:

CGACCATCAGGTCAAGGCCAACAA

>Bacillus\_Fam\_1729\_23\_1 Nr. of seq. 1 Alignment length(with gaps) = 23  
Alignment score = 0.000000  
GCF\_000171615.1\_ASM17161v1\_genomic.fna\_93:12659-12804 Satlength=146 Nr of  
Repeats=5 RepeatLength=21 seed=GTGCACGCAA Num.seqs=4 Similarity=0.719807  
0 GTGCACGCAAGAAGNCCGAAAAA

\*\*\*\*\*  
Consensus:

GTGCACGCAAGAAGNCCGAAAAA

>Bacillus\_Fam\_1730\_23\_1 Nr. of seq. 1 Alignment length(with gaps) = 23  
Alignment score = 0.000000  
GCF\_000186145.1\_Bacillus\_sp\_2\_A\_57\_CT2\_V1\_genomic.fna\_6:213928-214012  
Satlength=85 Nr of Repeats=4 RepeatLength=21 seed=TTGGCCGGTA Num.seqs=4

Similarity=0.396368  
TTGGCCGGTAATTTNCATTNAAA

0

\*\*\*\*\*  
Consensus:

TTGGCCGGTAATTTNCATTNAAA

>Bacillus\_Fam\_1731\_23\_1 Nr. of seq. 1 Alignment length(with gaps) = 23  
Alignment score = 0.000000  
GCF\_000305495.1\_BacPsy2.0\_genomic.fna\_90:7041-7359 Satlength=319 Nr of  
Repeats=7 RepeatLength=21 seed=ATTCGGCCCT Num.seqs=6 Similarity=0.508213  
0 ATTCGGCCCTTANTCTCCATCNN

\*\*\*\*\*  
Consensus:

ATTCGGCCCTTANTCTCCATCNN

>Bacillus\_Fam\_1732\_23\_1 Nr. of seq. 1 Alignment length(with gaps) = 23  
Alignment score = 0.000000  
GCF\_000331575.1\_ASM33157v1\_genomic.fna\_4:173707-173821 Satlength=115 Nr  
of Repeats=5 RepeatLength=23 seed=TACATGTAAA Num.seqs=4  
Similarity=0.876157  
0 TACATGTAAAATCATATTTTCGA

\*\*\*\*\*  
Consensus:

TACATGTAAAATCATATTTTCGA

>Bacillus\_Fam\_1733\_23\_1 Nr. of seq. 1 Alignment length(with gaps) = 23  
Alignment score = 0.000000  
GCF\_000709935.2\_ASM70993v2\_genomic.fna\_5:604719-605171 Satlength=453 Nr  
of Repeats=6 RepeatLength=21 seed=TACATCCAAC Num.seqs=4  
Similarity=0.555556  
0 TACATCCAACAATTAGAGCAATT

\*\*\*\*\*  
Consensus:

TACATCCAACAATTAGAGCAATT

>Bacillus\_Fam\_1734\_23\_1 Nr. of seq. 1 Alignment length(with gaps) = 23  
Alignment score = 0.000000  
GCF\_001591425.1\_ASM159142v1\_genomic.fna\_90:13367-13451 Satlength=85 Nr of  
Repeats=4 RepeatLength=21 seed=GGTGATAAAAT Num.seqs=4 Similarity=0.572464  
0 GGTGATAAAATAAATACCACTCTT

\*\*\*\*\*  
Consensus:

GGTGATAAAATAAATACCACTCTT

>Bacillus\_Fam\_1735\_23\_1 Nr. of seq. 1 Alignment length(with gaps) = 23  
Alignment score = 0.000000  
GCF\_001591425.1\_ASM159142v1\_genomic.fna\_135:8975-9359 Satlength=385 Nr of  
Repeats=11 RepeatLength=21 seed=GTTGAACAGA Num.seqs=8  
Similarity=0.610766  
0 GTTGAACAGAANNATCAAGTTGA

\*\*\*\*\*

Consensus:

GTTGAACAGAANNATCAAGTTGA

>Bacillus\_Fam\_1736\_23\_1 Nr. of seq. 1 Alignment length(with gaps) = 23  
Alignment score = 0.000000  
GCF\_001591825.1\_ASM159182v1\_genomic.fna\_26:22973-23057 Satlength=85 Nr of  
Repeats=4 RepeatLength=21 seed=AATCCAGCCG Num.seqs=4 Similarity=0.507246  
0 AATCCAGCCGANAATACGAAANG

\*\*\*\*\*

Consensus:

AATCCAGCCGANAATACGAAANG

>Bacillus\_Fam\_1737\_23\_1 Nr. of seq. 1 Alignment length(with gaps) = 23  
Alignment score = 0.000000  
GCF\_001636315.1\_ASM163631v1\_genomic.fna\_1:1929121-1929205 Satlength=85 Nr  
of Repeats=4 RepeatLength=21 seed=TTCCGCGATA Num.seqs=4  
Similarity=0.518519 0  
TTCCGCGATAACTNGCTNCATGN

\*\*\*\*\*

Consensus:

TTCCGCGATAACTNGCTNCATGN

>Bacillus\_Fam\_1738\_23\_1 Nr. of seq. 1 Alignment length(with gaps) = 23  
Alignment score = 0.000000  
GCF\_001645685.2\_ASM164568v2\_genomic.fna\_1:4339164-4339477 Satlength=314  
Nr of Repeats=15 RepeatLength=21 seed=TTTTCCGGCC Num.seqs=10  
Similarity=0.686634 0  
TTTTCCGGCCGGTCGACTCGACT

\*\*\*\*\*

Consensus:

TTTTCCGGCCGGTCGACTCGACT

>Bacillus\_Fam\_1739\_23\_1 Nr. of seq. 1 Alignment length(with gaps) = 23  
Alignment score = 0.000000  
GCF\_001712755.1\_ASM171275v1\_genomic.fna\_37:34288-34763 Satlength=476 Nr  
of Repeats=16 RepeatLength=20 seed=AATCGCAATT Num.seqs=12  
Similarity=0.595749 0  
AATCGCAATAAAATCNAAGNNN

\*\*\*\*\*

Consensus:

AATCGCAAATAAAATCNAAGNNN

>Bacillus\_Fam\_1740\_23\_1 Nr. of seq. 1 Alignment length(with gaps) = 23  
Alignment score = 0.000000

GCF\_900111815.1\_PRJEB17078\_genomic.fna\_1:496274-496585 Satlength=312 Nr  
of Repeats=11 RepeatLength=21 seed=AAATCAACCA Num.seqs=8  
Similarity=0.576605

0 AAATCAACCAACTNATGAGTGAG

\*\*\*\*\*

Consensus:

AAATCAACCAACTNATGAGTGAG

>Bacillus\_Fam\_1741\_22\_1 Nr. of seq. 1 Alignment length(with gaps) = 22  
Alignment score = 0.000000

GCF\_000175075.1\_ASM17507v1\_genomic.fna\_31:195679-195783 Satlength=105 Nr  
of Repeats=4 RepeatLength=21 seed=TATTTTCCGT Num.seqs=3  
Similarity=0.521739

0 TATTTTCCGTTACNGNTATATT

\*\*\*\*\*

Consensus:

TATTTTCCGTTACNGNTATATT

>Bacillus\_Fam\_1742\_22\_1 Nr. of seq. 1 Alignment length(with gaps) = 22  
Alignment score = 0.000000

GCF\_000175075.1\_ASM17507v1\_genomic.fna\_32:57067-57168 Satlength=102 Nr of  
Repeats=5 RepeatLength=20 seed=TTTCTTGATA Num.seqs=4 Similarity=0.589646  
0 TTTCTTGATATATCTTGCAANA

\*\*\*\*\*

Consensus:

TTTCTTGATATATCTTGCAANA

>Bacillus\_Fam\_1743\_22\_1 Nr. of seq. 1 Alignment length(with gaps) = 22  
Alignment score = 0.000000

GCF\_000242895.2\_ASM24289v3\_genomic.fna\_1:4424659-4424743 Satlength=85 Nr  
of Repeats=4 RepeatLength=21 seed=TTTATCGGCC Num.seqs=4  
Similarity=0.641304

0 TTTATCGGCCGCTTTTGATAAT

\*\*\*\*\*

Consensus:

TTTATCGGCCGCTTTTGATAAT

>Bacillus\_Fam\_1744\_22\_1 Nr. of seq. 1 Alignment length(with gaps) = 22  
Alignment score = 0.000000  
GCF\_000307875.1\_BABA1.0\_genomic.fna\_135:3379-3463 Satlength=85 Nr of  
Repeats=4 RepeatLength=21 seed=TTTATTTGCG Num.seqs=4 Similarity=0.525463  
19     ATTTGCGAAACTAGCCACATTT

\*\*\*\*\*

Consensus:

TTTATTTGCGAAACTAGCCACA

>Bacillus\_Fam\_1745\_22\_1 Nr. of seq. 1 Alignment length(with gaps) = 22  
Alignment score = 0.000000  
GCF\_000311725.1\_ASM31172v1\_genomic.fna\_2:350998-351082 Satlength=85 Nr of  
Repeats=4 RepeatLength=21 seed=ATTGCGGGCG Num.seqs=4 Similarity=0.601010  
0     ATTGCGGGCGTTCTANGCCATA

\*\*\*\*\*

Consensus:

ATTGCGGGCGTTCTANGCCATA

>Bacillus\_Fam\_1746\_22\_1 Nr. of seq. 1 Alignment length(with gaps) = 22  
Alignment score = 0.000000  
GCF\_000331575.1\_ASM33157v1\_genomic.fna\_4:23784-24242 Satlength=459 Nr of  
Repeats=13 RepeatLength=22 seed=GATACCTTAT Num.seqs=8  
Similarity=0.902597  
0     GATACCTTATGAGTACGGAAAT

\*\*\*\*\*

Consensus:

GATACCTTATGAGTACGGAAAT

>Bacillus\_Fam\_1747\_22\_1 Nr. of seq. 1 Alignment length(with gaps) = 22  
Alignment score = 0.000000  
GCF\_000429685.1\_ASM42968v1\_genomic.fna\_13:95209-95355 Satlength=147 Nr of  
Repeats=6 RepeatLength=21 seed=GAGGAGAAAA Num.seqs=4 Similarity=0.606061  
0     GAGGAGAAGAAANAGCGGAGCN

\*\*\*\*\*

Consensus:

GAGGAGAAGAAANAGCGGAGCN

>Bacillus\_Fam\_1748\_22\_1 Nr. of seq. 1 Alignment length(with gaps) = 22  
Alignment score = 0.000000  
GCF\_000429705.1\_ASM42970v1\_genomic.fna\_3:352016-352120 Satlength=105 Nr  
of Repeats=5 RepeatLength=21 seed=TATAATGAAT Num.seqs=4  
Similarity=0.637626  
0     TATAATGAATTCCTCAACNATA

\*\*\*\*\*

Consensus:

TATAATGAATTCCTCAACNATA

>Bacillus\_Fam\_1749\_22\_1 Nr. of seq. 1 Alignment length(with gaps) = 22  
Alignment score = 0.000000  
GCF\_000986785.1\_ASM98678v1\_genomic.fna\_5:35642-35726 Satlength=85 Nr of  
Repeats=4 RepeatLength=21 seed=TAATCCTGAT Num.seqs=4 Similarity=0.543981  
0 TAATCCTGATTTCGCTGCATT

\*\*\*\*\*

Consensus:

TAATCCTGATTTCGCTGCATT

>Bacillus\_Fam\_1750\_22\_1 Nr. of seq. 1 Alignment length(with gaps) = 22  
Alignment score = 0.000000  
GCF\_000986785.1\_ASM98678v1\_genomic.fna\_5:81208-81561 Satlength=354 Nr of  
Repeats=5 RepeatLength=21 seed=CAATAATTGA Num.seqs=4 Similarity=0.757576  
0 CAATAATTGATGCAATCAACTT

\*\*\*\*\*

Consensus:

CAATAATTGATGCAATCAACTT

>Bacillus\_Fam\_1751\_22\_1 Nr. of seq. 1 Alignment length(with gaps) = 22  
Alignment score = 0.000000  
GCF\_001591425.1\_ASM159142v1\_genomic.fna\_1:26204-26330 Satlength=127 Nr of  
Repeats=6 RepeatLength=21 seed=TTTTCTTAAC Num.seqs=6 Similarity=0.546377  
0 TTTACTTAACAGAGCTTCGGAA

\*\*\*\*\*

Consensus:

TTTACTTAACAGAGCTTCGGAA

>Bacillus\_Fam\_1752\_22\_1 Nr. of seq. 1 Alignment length(with gaps) = 22  
Alignment score = 0.000000  
GCF\_001591425.1\_ASM159142v1\_genomic.fna\_10:28205-28351 Satlength=147 Nr  
of Repeats=6 RepeatLength=21 seed=TGGTGCAACC Num.seqs=4  
Similarity=0.513285  
0 TGGTGCAACACCACCGCAAAAN

\*\*\*\*\*

Consensus:

TGGTGCAACACCACCGCAAAAN

>Bacillus\_Fam\_1753\_22\_1 Nr. of seq. 1 Alignment length(with gaps) = 22  
Alignment score = 0.000000  
GCF\_001591445.1\_ASM159144v1\_genomic.fna\_16:43521-43605 Satlength=85 Nr of  
Repeats=4 RepeatLength=21 seed=TCTATTGGCG Num.seqs=4 Similarity=0.717172  
0 TCTATTGGCGAATTTACCTAN

\*\*\*\*\*

Consensus:

TCTATTGGCGAATTTTCACCTAN

>Bacillus\_Fam\_1754\_22\_1 Nr. of seq. 1 Alignment length(with gaps) = 22  
Alignment score = 0.000000  
GCF\_001636345.1\_ASM163634v1\_genomic.fna\_1:454483-454588 Satlength=106 Nr  
of Repeats=5 RepeatLength=21 seed=TTTGATAGGA Num.seqs=5  
Similarity=0.542029  
0 TTTGATAGGAAAGCTGNTTANN

\*\*\*\*\*

Consensus:

TTTGATAGGAAAGCTGNTTANN

>Bacillus\_Fam\_1755\_22\_1 Nr. of seq. 1 Alignment length(with gaps) = 22  
Alignment score = 0.000000  
GCF\_001636425.1\_ASM163642v1\_genomic.fna\_1:4479552-4479636 Satlength=85 Nr  
of Repeats=4 RepeatLength=21 seed=TTTACCCGAT Num.seqs=4  
Similarity=0.631313 0  
TTTACCCGATTANACGCATANT

\*\*\*\*\*

Consensus:

TTTACCCGATTANACGCATANT

>Bacillus\_Fam\_1756\_22\_1 Nr. of seq. 1 Alignment length(with gaps) = 22  
Alignment score = 0.000000  
GCF\_001712755.1\_ASM171275v1\_genomic.fna\_37:29313-29417 Satlength=105 Nr  
of Repeats=5 RepeatLength=21 seed=TTTAATTGCA Num.seqs=4  
Similarity=0.585859  
0 TTTAATTGCAGATATAGCATAN

\*\*\*\*\*

Consensus:

TTTAATTGCAGATATAGCATAN

>Bacillus\_Fam\_1757\_22\_1 Nr. of seq. 1 Alignment length(with gaps) = 22  
Alignment score = 0.000000  
GCF\_002019665.1\_ASM201966v1\_genomic.fna\_1:3363210-3363336 Satlength=127  
Nr of Repeats=6 RepeatLength=21 seed=ATTCGTCCAG Num.seqs=6  
Similarity=0.657071 0  
ATTCGTCCGAAATCCGCCTTCN

\*\*\*\*\*

Consensus:

ATTCGTCCGAAATCCGCCTTCN

>Bacillus\_Fam\_1758\_22\_1 Nr. of seq. 1 Alignment length(with gaps) = 22  
Alignment score = 0.000000  
GCF\_900104555.1\_IMG-  
taxon\_2651870172\_annotated\_assembly\_genomic.fna\_19:64922-65582  
Satlength=661 Nr of Repeats=20 RepeatLength=21 seed=TCGCGGGATT  
Num.seqs=14 Similarity=0.665668 0  
TCGCGGGATTNCCATGCTCTTT

\*\*\*\*\*

Consensus:

TCGCGGGATTNCCATGCTCTTT

>Bacillus\_Fam\_1759\_21\_1 Nr. of seq. 1 Alignment length(with gaps) = 21  
Alignment score = 0.000000  
GCF\_000153365.1\_ASM15336v1\_genomic.fna\_17:503213-503318 Satlength=106 Nr  
of Repeats=4 RepeatLength=21 seed=TCAAACCTTT Num.seqs=3  
Similarity=0.788360  
0 TCAAACCTTTTATCAACAGCA

\*\*\*\*\*

Consensus:

TCAAACCTTTTATCAACAGCA

>Bacillus\_Fam\_1760\_21\_1 Nr. of seq. 1 Alignment length(with gaps) = 21  
Alignment score = 0.000000  
GCF\_000161455.1\_ASM16145v1\_genomic.fna\_1:1878049-1878322 Satlength=274 Nr  
of Repeats=12 RepeatLength=21 seed=GGTGGCACAA Num.seqs=11  
Similarity=0.866089 0  
GGTGGCACAAACCCAGGC

\*\*\*\*\*

Consensus:

GGTGGCACAAACCCAGGC

>Bacillus\_Fam\_1761\_21\_1 Nr. of seq. 1 Alignment length(with gaps) = 21  
Alignment score = 0.000000  
GCF\_000171615.1\_ASM17161v1\_genomic.fna\_106:18545-18854 Satlength=310 Nr  
of Repeats=10 RepeatLength=21 seed=CCGCACGAGA Num.seqs=7  
Similarity=0.617605  
0 CCGCACGAGAAGAAGGTCCNC

\*\*\*\*\*

Consensus:

CCGCACGAGAAGAAGGTCCNC

>Bacillus\_Fam\_1762\_21\_1 Nr. of seq. 1 Alignment length(with gaps) = 21  
Alignment score = 0.000000  
GCF\_000245315.1\_ASM24531v1\_genomic.fna\_45:163118-163205 Satlength=88 Nr  
of Repeats=4 RepeatLength=21 seed=GCCGGGCACA Num.seqs=3



Similarity=1.000000  
0 GCCGGGCACACCGCCGCCGAA

\*\*\*\*\*  
Consensus:

GCCGGGCACACCGCCGCCGAA

>Bacillus\_Fam\_1763\_21\_1 Nr. of seq. 1 Alignment length(with gaps) = 21  
Alignment score = 0.000000  
GCF\_000290995.1\_Baci\_cere\_AND1407\_G13175\_V1\_genomic.fna\_1:1730757-1730841  
Satlength=85 Nr of Repeats=4 RepeatLength=21 seed=TCTTTTTTTTG Num.seqs=4  
Similarity=0.957672 0  
TCTTTTTTTGGCTCACAATCC

\*\*\*\*\*  
Consensus:

TCTTTTTTTGGCTCACAATCC

>Bacillus\_Fam\_1764\_21\_1 Nr. of seq. 1 Alignment length(with gaps) = 21  
Alignment score = 0.000000  
GCF\_000331575.1\_ASM33157v1\_genomic.fna\_1:475624-475876 Satlength=253 Nr  
of Repeats=12 RepeatLength=21 seed=TTACCCATAT Num.seqs=12  
Similarity=0.735308 0  
TTACCCATATATCTGNGCACT

\*\*\*\*\*  
Consensus:

TTACCCATATATCTGNGCACT

>Bacillus\_Fam\_1765\_21\_1 Nr. of seq. 1 Alignment length(with gaps) = 21  
Alignment score = 0.000000  
GCF\_000331575.1\_ASM33157v1\_genomic.fna\_2:594953-595079 Satlength=127 Nr  
of Repeats=5 RepeatLength=21 seed=TTCTTCCGT Num.seqs=4  
Similarity=0.862434  
0 TTCCTTCCGTGGTAACGTGGA

\*\*\*\*\*  
Consensus:

TTCCTTCCGTGGTAACGTGGA

>Bacillus\_Fam\_1766\_21\_1 Nr. of seq. 1 Alignment length(with gaps) = 21  
Alignment score = 0.000000  
GCF\_000331575.1\_ASM33157v1\_genomic.fna\_4:107598-107787 Satlength=190 Nr  
of Repeats=7 RepeatLength=21 seed=AATCGAGTGC Num.seqs=5  
Similarity=0.911111  
0 AATCGAGTGCTTTTCTCGCGG

\*\*\*\*\*  
Consensus:

AATCGAGTGCTTTTCTCGCGG

>Bacillus\_Fam\_1767\_21\_1 Nr. of seq. 1 Alignment length(with gaps) = 21  
Alignment score = 0.000000  
GCF\_000331575.1\_ASM33157v1\_genomic.fna\_4:141893-142040 Satlength=148 Nr  
of Repeats=7 RepeatLength=21 seed=TTTACCCATA Num.seqs=7  
Similarity=0.687590  
0 TTTACCCATATGAATTAGCTA

\*\*\*\*\*

Consensus:

TTTACCCATATGAATTAGCTA

>Bacillus\_Fam\_1768\_21\_1 Nr. of seq. 1 Alignment length(with gaps) = 21  
Alignment score = 0.000000  
GCF\_000331575.1\_ASM33157v1\_genomic.fna\_4:228625-228873 Satlength=249 Nr  
of Repeats=10 RepeatLength=21 seed=TACCCACATA Num.seqs=9  
Similarity=0.669082  
0 TACCCACATAAAATGCGGATT

\*\*\*\*\*

Consensus:

TACCCACATAAAATGCGGATT

>Bacillus\_Fam\_1769\_21\_1 Nr. of seq. 1 Alignment length(with gaps) = 21  
Alignment score = 0.000000  
GCF\_000334155.1\_L1\_genomic.fna\_69:26716-27262 Satlength=547 Nr of  
Repeats=26 RepeatLength=21 seed=CATGAAGAAG Num.seqs=26  
Similarity=0.867936  
0 CATGAAGAAGAAGAACATGGA

\*\*\*\*\*

Consensus:

CATGAAGAAGAAGAACATGGA

>Bacillus\_Fam\_1770\_21\_1 Nr. of seq. 1 Alignment length(with gaps) = 21  
Alignment score = 0.000000  
GCF\_000401235.1\_BacNeaAAU1\_genomic.fna\_109:50519-50812 Satlength=294 Nr  
of Repeats=14 RepeatLength=21 seed=TTGGCTGATA Num.seqs=13  
Similarity=0.808081  
TTGGCTGATATCGGTGTTGGA

0

\*\*\*\*\*

Consensus:

TTGGCTGATATCGGTGTTGGA

>Bacillus\_Fam\_1771\_21\_1 Nr. of seq. 1 Alignment length(with gaps) = 21  
Alignment score = 0.000000

GCF\_000429705.1\_ASM42970v1\_genomic.fna\_1:164813-164917 Satlength=105 Nr  
of Repeats=5 RepeatLength=21 seed=TATAATGAAT Num.seqs=4  
Similarity=0.498843  
0 TATAATGAATCTCGAANCATT

\*\*\*\*\*

Consensus:

TATAATGAATCTCGAANCATT

>Bacillus\_Fam\_1772\_21\_1 Nr. of seq. 1 Alignment length(with gaps) = 21  
Alignment score = 0.000000  
GCF\_000429705.1\_ASM42970v1\_genomic.fna\_1:212906-213009 Satlength=104 Nr  
of Repeats=5 RepeatLength=21 seed=AAAGTGATGG Num.seqs=3  
Similarity=0.682540  
0 AAAGTGATTGATAANNGGATN

\*\*\*\*\*

Consensus:

AAAGTGATTGATAANNGGATN

>Bacillus\_Fam\_1773\_21\_1 Nr. of seq. 1 Alignment length(with gaps) = 21  
Alignment score = 0.000000  
GCF\_000429705.1\_ASM42970v1\_genomic.fna\_1:1695051-1695135 Satlength=85 Nr  
of Repeats=4 RepeatLength=21 seed=TTAAACAGGT Num.seqs=4  
Similarity=0.693122  
0 TTAAACAGGTTAGGCTCTCAT

\*\*\*\*\*

Consensus:

TTAAACAGGTTAGGCTCTCAT

>Bacillus\_Fam\_1774\_21\_1 Nr. of seq. 1 Alignment length(with gaps) = 21  
Alignment score = 0.000000  
GCF\_000429705.1\_ASM42970v1\_genomic.fna\_2:604162-604246 Satlength=85 Nr of  
Repeats=4 RepeatLength=21 seed=TAATTCTACC Num.seqs=4 Similarity=0.520833  
0 TAATTCTACCTAAAAAGNCAT

\*\*\*\*\*

Consensus:

TAATTCTACCTAAAAAGNCAT

>Bacillus\_Fam\_1775\_21\_1 Nr. of seq. 1 Alignment length(with gaps) = 21  
Alignment score = 0.000000  
GCF\_000430765.1\_ASM43076v1\_genomic.fna\_7:272233-272397 Satlength=165 Nr  
of Repeats=5 RepeatLength=21 seed=GAGCAAAAAA Num.seqs=3  
Similarity=0.416667  
0 GAGCAAAAAAGNACCNTGCNG

\*\*\*\*\*

Consensus:

GAGCAAAAAAGNACCNTGCNG

>Bacillus\_Fam\_1776\_21\_1 Nr. of seq. 1 Alignment length(with gaps) = 21  
Alignment score = 0.000000  
GCF\_000430765.1\_ASM43076v1\_genomic.fna\_14:8047-8192 Satlength=146 Nr of  
Repeats=7 RepeatLength=21 seed=TTTTTGCTCA Num.seqs=5 Similarity=0.525333  
0 TTTTTGCTCANCACACCNATN

\*\*\*\*\*  
Consensus:

TTTTTGCTCANCACACCNATN

>Bacillus\_Fam\_1777\_21\_1 Nr. of seq. 1 Alignment length(with gaps) = 21  
Alignment score = 0.000000  
GCF\_000430785.1\_ASM43078v1\_genomic.fna\_3:131543-131690 Satlength=148 Nr  
of Repeats=7 RepeatLength=21 seed=TGCCACAAGG Num.seqs=7  
Similarity=0.945578  
0 TGCCACAAGGAATGCATCAAG

\*\*\*\*\*  
Consensus:

TGCCACAAGGAATGCATCAAG

>Bacillus\_Fam\_1778\_21\_1 Nr. of seq. 1 Alignment length(with gaps) = 21  
Alignment score = 0.000000  
GCF\_000474275.1\_Bmar1.0\_genomic.fna\_20:6145-6290 Satlength=146 Nr of  
Repeats=4 RepeatLength=21 seed=ACTGACGCAA Num.seqs=3 Similarity=1.000000  
0 ACTGACGCAATAGCGTCTGGA

\*\*\*\*\*  
Consensus:

ACTGACGCAATAGCGTCTGGA

>Bacillus\_Fam\_1779\_21\_1 Nr. of seq. 1 Alignment length(with gaps) = 21  
Alignment score = 0.000000  
GCF\_000496285.1\_ASM49628v1\_genomic.fna\_1:2486611-2486716 Satlength=106 Nr  
of Repeats=5 RepeatLength=21 seed=TTGGATCTTT Num.seqs=5  
Similarity=0.898413  
TTGGATCTTTCGGATCTGTGC 0

\*\*\*\*\*  
Consensus:

TTGGATCTTTCGGATCTGTGC

>Bacillus\_Fam\_1780\_21\_1 Nr. of seq. 1 Alignment length(with gaps) = 21  
Alignment score = 0.000000  
GCF\_000504145.1\_SOAPdenovo\_for\_version2.04\_of\_Bacillus\_sp.\_FJAT-  
14515\_genome\_genomic.fna\_1:1809470-1809638 Satlength=169 Nr of Repeats=8

RepeatLength=21 seed=CTTCTTGGGA Num.seqs=8 Similarity=0.895692 0  
CTTCTTGGGACCGTCATCCGG

\*\*\*\*\*

Consensus:

CTTCTTGGGACCGTCATCCGG

>Bacillus\_Fam\_1781\_21\_1 Nr. of seq. 1 Alignment length(with gaps) = 21  
Alignment score = 0.000000  
GCF\_000508325.1\_BAVI\_1\_genomic.fna\_92:129782-130070 Satlength=289 Nr of  
Repeats=4 RepeatLength=21 seed=AAGTGACCGG Num.seqs=3 Similarity=0.628019  
0 AAGTGACCGGTATTTNNACNA

\*\*\*\*\*

Consensus:

AAGTGACCGGTATTTNNACNA

>Bacillus\_Fam\_1782\_21\_1 Nr. of seq. 1 Alignment length(with gaps) = 21  
Alignment score = 0.000000  
GCF\_000526655.1\_ASM52665v1\_genomic.fna\_1:7-112 Satlength=106 Nr of  
Repeats=5 RepeatLength=21 seed=GAAGTGCAGAC Num.seqs=5 Similarity=0.847619  
0 GAAGTGCAGACGGTTGCGAGAA

\*\*\*\*\*

Consensus:

GAAGTGCAGACGGTTGCGAGAA

>Bacillus\_Fam\_1783\_21\_1 Nr. of seq. 1 Alignment length(with gaps) = 21  
Alignment score = 0.000000  
GCF\_000612625.1\_JCE\_genomic.fna\_8:31125-31331 Satlength=207 Nr of  
Repeats=5 RepeatLength=21 seed=GGATCATTTT Num.seqs=3 Similarity=0.509259  
0 GGATCATTTTCCAATATCNTT

\*\*\*\*\*

Consensus:

GGATCATTTTCCAATATCNTT

>Bacillus\_Fam\_1784\_21\_1 Nr. of seq. 1 Alignment length(with gaps) = 21  
Alignment score = 0.000000  
GCF\_000612665.1\_FF4\_genomic.fna\_12:2775-2932 Satlength=158 Nr of  
Repeats=4 RepeatLength=21 seed=AATTTGTAGA Num.seqs=3 Similarity=0.788360  
0 AATTTGTAGATATCTAGACCA

\*\*\*\*\*

Consensus:

AATTTGTAGATATCTAGACCA

>Bacillus\_Fam\_1785\_21\_1 Nr. of seq. 1 Alignment length(with gaps) = 21  
Alignment score = 0.000000

GCF\_000612665.1\_FF4\_genomic.fna\_25:19828-19954 Satlength=127 Nr of  
Repeats=6 RepeatLength=21 seed=CAGCCAGCAC Num.seqs=6 Similarity=0.957672  
0 CAGCCAGCACCGCAGCAGGCA

\*\*\*\*\*

Consensus:

CAGCCAGCACCGCAGCAGGCA

>Bacillus\_Fam\_1786\_21\_1 Nr. of seq. 1 Alignment length(with gaps) = 21  
Alignment score = 0.000000  
GCF\_000612805.1\_FF3\_genomic.fna\_6:195760-195886 Satlength=127 Nr of  
Repeats=5 RepeatLength=21 seed=CCTGGGAAAA Num.seqs=4 Similarity=0.798942  
0 CCTGGGAAAAACGGACCCACA

\*\*\*\*\*

Consensus:

CCTGGGAAAAACGGACCCACA

>Bacillus\_Fam\_1787\_21\_1 Nr. of seq. 1 Alignment length(with gaps) = 21  
Alignment score = 0.000000  
GCF\_000709935.2\_ASM70993v2\_genomic.fna\_5:763265-763757 Satlength=493 Nr  
of Repeats=5 RepeatLength=21 seed=TTTGGATTGT Num.seqs=3  
Similarity=1.000000  
0 TTTGGATTGTTACACGCCGCA

\*\*\*\*\*

Consensus:

TTTGGATTGTTACACGCCGCA

>Bacillus\_Fam\_1788\_21\_1 Nr. of seq. 1 Alignment length(with gaps) = 21  
Alignment score = 0.000000  
GCF\_000724485.1\_ASM72448v1\_genomic.fna\_1:2060503-2060703 Satlength=201 Nr  
of Repeats=4 RepeatLength=21 seed=AACGGGAGTA Num.seqs=3  
Similarity=0.681818  
AACGGGAGTAAANTCCTCCTG 0

\*\*\*\*\*

Consensus:

AACGGGAGTAAANTCCTCCTG

>Bacillus\_Fam\_1789\_21\_1 Nr. of seq. 1 Alignment length(with gaps) = 21  
Alignment score = 0.000000  
GCF\_000751775.1\_A1A\_genomic.fna\_84:23149-23297 Satlength=149 Nr of  
Repeats=6 RepeatLength=21 seed=ATTCAACAGT Num.seqs=4 Similarity=0.502645  
0 ATTCAACAGTAGATTACGAGT

\*\*\*\*\*

Consensus:

ATTCAACAGTAGATTACGAGT

>Bacillus\_Fam\_1790\_21\_1 Nr. of seq. 1 Alignment length(with gaps) = 21  
Alignment score = 0.000000  
GCF\_000751775.1\_A1A\_genomic.fna\_102:29051-29177 Satlength=127 Nr of  
Repeats=5 RepeatLength=21 seed=ATGGACAAGC Num.seqs=4 Similarity=0.936508  
0 ATGGACAAGCTTGAATCCCGA

\*\*\*\*\*

Consensus:

ATGGACAAGCTTGAATCCCGA

>Bacillus\_Fam\_1791\_21\_1 Nr. of seq. 1 Alignment length(with gaps) = 21  
Alignment score = 0.000000  
GCF\_000752035.1\_Bacillus\_rubiinfantis\_genomic.fna\_11:391259-391490  
Satlength=232 Nr of Repeats=11 RepeatLength=21 seed=TACGAGAGTA  
Num.seqs=11 Similarity=0.611331 0  
TACGAGAGTAAACCTGNGTTA

\*\*\*\*\*

Consensus:

TACGAGAGTAAACCTGNGTTA

>Bacillus\_Fam\_1792\_21\_1 Nr. of seq. 1 Alignment length(with gaps) = 21  
Alignment score = 0.000000  
GCF\_000752035.1\_Bacillus\_rubiinfantis\_genomic.fna\_11:573150-573648  
Satlength=499 Nr of Repeats=18 RepeatLength=21 seed=TCTACAAATT  
Num.seqs=12 Similarity=0.615200 0  
TCTACAAATTCAGGNCCGTAT

\*\*\*\*\*

Consensus:

TCTACAAATTCAGGNCCGTAT

>Bacillus\_Fam\_1793\_21\_1 Nr. of seq. 1 Alignment length(with gaps) = 21  
Alignment score = 0.000000  
GCF\_000752035.1\_Bacillus\_rubiinfantis\_genomic.fna\_23:26534-26639  
Satlength=106 Nr of Repeats=4 RepeatLength=21 seed=TGTTTCTACA Num.seqs=3  
Similarity=0.957672 0  
TGTTTCTACAAATTAAAGATG

\*\*\*\*\*

Consensus:

TGTTTCTACAAATTAAAGATG

>Bacillus\_Fam\_1794\_21\_1 Nr. of seq. 1 Alignment length(with gaps) = 21  
Alignment score = 0.000000  
GCF\_000752035.1\_Bacillus\_rubiinfantis\_genomic.fna\_30:64121-64390  
Satlength=270 Nr of Repeats=11 RepeatLength=21 seed=TTTTGTAGAT  
Num.seqs=9 Similarity=0.602623  
0 TTTTGTAGANTNAGCACTTAA

\*\*\*\*\*

Consensus:

TTTTGTAGANTNAGCACTTAA

>Bacillus\_Fam\_1795\_21\_1 Nr. of seq. 1 Alignment length(with gaps) = 21  
Alignment score = 0.000000  
GCF\_000752395.1\_Bacillus\_andreraoultii\_genomic.fna\_12:197233-197359  
Satlength=127 Nr of Repeats=6 RepeatLength=21 seed=TACTGTTGAA Num.seqs=6  
Similarity=0.624074 0  
TACTGTTGAAGTTTCATCTTT

\*\*\*\*\*

Consensus:

TACTGTTGAAGTTTCATCTTT

>Bacillus\_Fam\_1796\_21\_1 Nr. of seq. 1 Alignment length(with gaps) = 21  
Alignment score = 0.000000  
GCF\_000752395.1\_Bacillus\_andreraoultii\_genomic.fna\_45:59415-59652  
Satlength=238 Nr of Repeats=9 RepeatLength=20 seed=AACTTCGGAA Num.seqs=6  
Similarity=0.503535 0  
AACTTCGGAAATNATAGCNTC

\*\*\*\*\*

Consensus:

AACTTCGGAAATNATAGCNTC

>Bacillus\_Fam\_1797\_21\_1 Nr. of seq. 1 Alignment length(with gaps) = 21  
Alignment score = 0.000000  
GCF\_000759675.1\_ASM75967v1\_genomic.fna\_150:11338-11443 Satlength=106 Nr  
of Repeats=5 RepeatLength=21 seed=AGTCCAAAAC Num.seqs=3  
Similarity=0.682540  
0 AGTCCAAAACNCATGGAAAT

\*\*\*\*\*

Consensus:

AGTCCAAAACNCATGGAAAT

>Bacillus\_Fam\_1798\_21\_1 Nr. of seq. 1 Alignment length(with gaps) = 21  
Alignment score = 0.000000  
GCF\_000759675.1\_ASM75967v1\_genomic.fna\_158:119179-119305 Satlength=127 Nr  
of Repeats=5 RepeatLength=21 seed=CTGTTCTACA Num.seqs=4  
Similarity=0.777778 0  
CTGTTCTACAGCTTCGACAAG

\*\*\*\*\*

Consensus:

CTGTTCTACAGCTTCGACAAG



>Bacillus\_Fam\_1799\_21\_1 Nr. of seq. 1 Alignment length(with gaps) = 21  
Alignment score = 0.000000  
GCF\_000812025.2\_ASM81202v2\_genomic.fna\_59:9522-9690 Satlength=169 Nr of  
Repeats=8 RepeatLength=21 seed=AAGGAACAGC Num.seqs=6 Similarity=0.671212  
0 AAGGAACAGCCGAAACAAGTA

\*\*\*\*\*  
Consensus:

AAGGAACAGCCGAAACAAGTA

>Bacillus\_Fam\_1800\_21\_1 Nr. of seq. 1 Alignment length(with gaps) = 21  
Alignment score = 0.000000  
GCF\_000813125.1\_ASM81312v1\_genomic.fna\_110:11398-11482 Satlength=85 Nr of  
Repeats=4 RepeatLength=21 seed=AGAGATTAT Num.seqs=4 Similarity=0.875000  
0 AGAGATTATCTCCAGTTAAG

\*\*\*\*\*  
Consensus:

AGAGATTATCTCCAGTTAAG

>Bacillus\_Fam\_1801\_21\_1 Nr. of seq. 1 Alignment length(with gaps) = 21  
Alignment score = 0.000000  
GCF\_000813125.1\_ASM81312v1\_genomic.fna\_129:71964-72048 Satlength=85 Nr of  
Repeats=4 RepeatLength=21 seed=ATTCCGCGAA Num.seqs=4 Similarity=0.587302  
0 ATTCCGCGAAAAATTCTTTA

\*\*\*\*\*  
Consensus:

ATTCCGCGAAAAATTCTTTA

>Bacillus\_Fam\_1802\_21\_1 Nr. of seq. 1 Alignment length(with gaps) = 21  
Alignment score = 0.000000  
GCF\_000813125.1\_ASM81312v1\_genomic.fna\_142:7599-7683 Satlength=85 Nr of  
Repeats=4 RepeatLength=21 seed=TTTTTCTACG Num.seqs=4 Similarity=0.586957  
0 TTTTCTACGGTTGGCAGCAN

\*\*\*\*\*  
Consensus:

TTTTTCTACGGTTGGCAGCAN

>Bacillus\_Fam\_1803\_21\_1 Nr. of seq. 1 Alignment length(with gaps) = 21  
Alignment score = 0.000000  
GCF\_000831065.1\_ASM83106v1\_genomic.fna\_1:1513435-1513582 Satlength=148 Nr  
of Repeats=7 RepeatLength=21 seed=AAAACCAGAA Num.seqs=7  
Similarity=0.897203  
AAAACCAGAAAGCGAAGGTGG 0

\*\*\*\*\*  
Consensus:

AAAACCAGAAGGCGAAGGTGG

>Bacillus\_Fam\_1804\_21\_1 Nr. of seq. 1 Alignment length(with gaps) = 21  
Alignment score = 0.000000  
GCF\_000832605.1\_ASM83260v1\_genomic.fna\_1:783460-783565 Satlength=106 Nr  
of Repeats=5 RepeatLength=21 seed=AGACTAAGCT Num.seqs=5  
Similarity=1.000000  
0 AGACTAAGCTGATACTTAATG

\*\*\*\*\*

Consensus:

AGACTAAGCTGATACTTAATG

>Bacillus\_Fam\_1805\_21\_1 Nr. of seq. 1 Alignment length(with gaps) = 21  
Alignment score = 0.000000  
GCF\_000948175.1\_BFA\_2\_A\_genomic.fna\_39:29576-29984 Satlength=409 Nr of  
Repeats=4 RepeatLength=21 seed=GGTTGGATCG Num.seqs=3 Similarity=0.915344  
0 GGTTGGATCGGGTTGAAGAGC

\*\*\*\*\*

Consensus:

GGTTGGATCGGGTTGAAGAGC

>Bacillus\_Fam\_1806\_21\_1 Nr. of seq. 1 Alignment length(with gaps) = 21  
Alignment score = 0.000000  
GCF\_000986785.1\_ASM98678v1\_genomic.fna\_38:8628-8733 Satlength=106 Nr of  
Repeats=5 RepeatLength=21 seed=TTGGAAAATA Num.seqs=5 Similarity=0.476812  
0 TTGGAAAATAAACTTNCTNTN

\*\*\*\*\*

Consensus:

TTGGAAAATAAACTTNCTNTN

>Bacillus\_Fam\_1807\_21\_1 Nr. of seq. 1 Alignment length(with gaps) = 21  
Alignment score = 0.000000  
GCF\_001273755.1\_ASM127375v1\_genomic.fna\_17:3548301-3548609 Satlength=309  
Nr of Repeats=13 RepeatLength=21 seed=GACGAATTAT Num.seqs=8  
Similarity=0.615823 0  
GACGAATTATCTTCTCTCAAG

\*\*\*\*\*

Consensus:

GACGAATTATCTTCTCTCAAG

>Bacillus\_Fam\_1808\_21\_1 Nr. of seq. 1 Alignment length(with gaps) = 21  
Alignment score = 0.000000  
GCF\_001278705.1\_ASM127870v1\_genomic.fna\_1:21006-21130 Satlength=125 Nr of  
Repeats=6 RepeatLength=21 seed=GGCACATAAA Num.seqs=4 Similarity=0.586957  
0 GGCACATAAACTACGTCGAGT

\*\*\*\*\*

Consensus:

GGCACATAAACTACGTCGAGT

>Bacillus\_Fam\_1809\_21\_1 Nr. of seq. 1 Alignment length(with gaps) = 21  
Alignment score = 0.000000

GCF\_001278705.1\_ASM127870v1\_genomic.fna\_1:3026647-3026771 Satlength=125

Nr of Repeats=6 RepeatLength=21 seed=TTATGCGCGA Num.seqs=4

Similarity=0.693122

0

TTATGCGCGATCTTCCCTCGG

\*\*\*\*\*

Consensus:

TTATGCGCGATCTTCCCTCGG

>Bacillus\_Fam\_1810\_21\_1 Nr. of seq. 1 Alignment length(with gaps) = 21  
Alignment score = 0.000000

GCF\_001315065.1\_ASM131506v1\_genomic.fna\_5:75663-75783 Satlength=121 Nr of

Repeats=4 RepeatLength=21 seed=AACAAGCACA Num.seqs=3 Similarity=0.601010

0 AACAAGCACAGCANGCAATTC

\*\*\*\*\*

Consensus:

AACAAGCACAGCANGCAATTC

>Bacillus\_Fam\_1811\_21\_1 Nr. of seq. 1 Alignment length(with gaps) = 21  
Alignment score = 0.000000

GCF\_001315165.1\_ASM131516v1\_genomic.fna\_94:3047-3130 Satlength=84 Nr of

Repeats=4 RepeatLength=21 seed=TTTGCGAATA Num.seqs=3 Similarity=0.646465

0 TTTGCGAATAAACCATNNATT

\*\*\*\*\*

Consensus:

TTTGCGAATAAACCATNNATT

>Bacillus\_Fam\_1812\_21\_1 Nr. of seq. 1 Alignment length(with gaps) = 21  
Alignment score = 0.000000

GCF\_001420595.1\_ASM142059v1\_genomic.fna\_11:777561-777645 Satlength=85 Nr

of Repeats=4 RepeatLength=21 seed=TGCTAGATAA Num.seqs=4

Similarity=0.642677

0 TGCTAGATAAATAGCTACAAT

\*\*\*\*\*

Consensus:

TGCTAGATAAATAGCTACAAT

>Bacillus\_Fam\_1813\_21\_1 Nr. of seq. 1 Alignment length(with gaps) = 21  
Alignment score = 0.000000

GCF\_001420715.1\_ASM142071v1\_genomic.fna\_22:401748-401832 Satlength=85 Nr  
of Repeats=4 RepeatLength=21 seed=GCGGGATTAT Num.seqs=4  
Similarity=0.703704  
0 GCGGGATTATAGTAAAAATTC

\*\*\*\*\*

Consensus:

GCGGGATTATAGTAAAAATTC

>Bacillus\_Fam\_1814\_21\_1 Nr. of seq. 1 Alignment length(with gaps) = 21  
Alignment score = 0.000000  
GCF\_001439635.1\_ASM143963v1\_genomic.fna\_162:47575-47699 Satlength=125 Nr  
of Repeats=5 RepeatLength=21 seed=TAATAGACAA Num.seqs=3  
Similarity=0.537778  
0 TAATAGACAAAATACTTNGGN

\*\*\*\*\*

Consensus:

TAATAGACAAAATACTTNGGN

>Bacillus\_Fam\_1815\_21\_1 Nr. of seq. 1 Alignment length(with gaps) = 21  
Alignment score = 0.000000  
GCF\_001439915.1\_ASM143991v1\_genomic.fna\_90:1-81 Satlength=81 Nr of  
Repeats=4 RepeatLength=20 seed=CGACGCAAAT Num.seqs=4 Similarity=0.671958  
0 CGACGCAAATAATCCAGTAAT

\*\*\*\*\*

Consensus:

CGACGCAAATAATCCAGTAAT

>Bacillus\_Fam\_1816\_21\_1 Nr. of seq. 1 Alignment length(with gaps) = 21  
Alignment score = 0.000000  
GCF\_001439915.1\_ASM143991v1\_genomic.fna\_105:333431-333536 Satlength=106  
Nr of Repeats=5 RepeatLength=21 seed=TAGGGCACAA Num.seqs=5  
Similarity=0.574603  
TAGGGCACAAATTANTTCCANN 0

\*\*\*\*\*

Consensus:

TAGGGCACAAATTANTTCCANN

>Bacillus\_Fam\_1817\_21\_1 Nr. of seq. 1 Alignment length(with gaps) = 21  
Alignment score = 0.000000  
GCF\_001439915.1\_ASM143991v1\_genomic.fna\_122:184310-184415 Satlength=106  
Nr of Repeats=5 RepeatLength=21 seed=ACCTCCTAGT Num.seqs=5  
Similarity=0.961905  
ACCTCCTAGTCCAACAGGAAA 0

\*\*\*\*\*

Consensus:

ACCTCCTAGTCCAACAGGAAA

>Bacillus\_Fam\_1818\_21\_1 Nr. of seq. 1 Alignment length(with gaps) = 21  
Alignment score = 0.000000  
GCF\_001484965.1\_ASM148496v1\_genomic.fna\_38:7986-8153 Satlength=168 Nr of  
Repeats=7 RepeatLength=21 seed=GCGAGAATCC Num.seqs=6 Similarity=0.788889  
0 GCGAGAATCCAGACAAGAGGA

\*\*\*\*\*  
Consensus:

GCGAGAATCCAGACAAGAGGA

>Bacillus\_Fam\_1819\_21\_1 Nr. of seq. 1 Alignment length(with gaps) = 21  
Alignment score = 0.000000  
GCF\_001584325.1\_ASM158432v1\_genomic.fna\_23:115575-115659 Satlength=85 Nr  
of Repeats=4 RepeatLength=21 seed=GTCCTCCAAT Num.seqs=4  
Similarity=0.814394  
0 GTCCTCCAATGCTTCAACTCT

\*\*\*\*\*  
Consensus:

GTCCTCCAATGCTTCAACTCT

>Bacillus\_Fam\_1820\_21\_1 Nr. of seq. 1 Alignment length(with gaps) = 21  
Alignment score = 0.000000  
GCF\_001590785.1\_ASM159078v1\_genomic.fna\_16:23682-23806 Satlength=125 Nr  
of Repeats=6 RepeatLength=21 seed=GGAAGCGGAG Num.seqs=5  
Similarity=0.898413  
0 GGAAGCGGAGACGGAGATAGC

\*\*\*\*\*  
Consensus:

GGAAGCGGAGACGGAGATAGC

>Bacillus\_Fam\_1821\_21\_1 Nr. of seq. 1 Alignment length(with gaps) = 21  
Alignment score = 0.000000  
GCF\_001591425.1\_ASM159142v1\_genomic.fna\_6:69823-70055 Satlength=233 Nr of  
Repeats=10 RepeatLength=21 seed=GTTGCACCAG Num.seqs=6  
Similarity=0.729101  
0 GTTGCACCAGTTTGTACGGT

\*\*\*\*\*  
Consensus:

GTTGCACCAGTTTGTACGGT

>Bacillus\_Fam\_1822\_21\_1 Nr. of seq. 1 Alignment length(with gaps) = 21  
Alignment score = 0.000000  
GCF\_001591425.1\_ASM159142v1\_genomic.fna\_57:20937-21147 Satlength=211 Nr  
of Repeats=9 RepeatLength=21 seed=TGGCACAAAA Num.seqs=8

Similarity=0.649327  
0 TGGCACAAAAGGATGTTGGGT

\*\*\*\*\*  
Consensus:

TGGCACAAAAGGATGTTGGGT

>Bacillus\_Fam\_1823\_21\_1 Nr. of seq. 1 Alignment length(with gaps) = 21  
Alignment score = 0.000000  
GCF\_001591425.1\_ASM159142v1\_genomic.fna\_130:10418-10565 Satlength=148 Nr  
of Repeats=7 RepeatLength=21 seed=TTGACGCACT Num.seqs=7  
Similarity=0.576950  
0 TTGACGCACTTGNAATTAA

\*\*\*\*\*  
Consensus:

TTGACGCACTTGNAATTAA

>Bacillus\_Fam\_1824\_21\_1 Nr. of seq. 1 Alignment length(with gaps) = 21  
Alignment score = 0.000000  
GCF\_001591425.1\_ASM159142v1\_genomic.fna\_153:1987-2338 Satlength=352 Nr of  
Repeats=11 RepeatLength=21 seed=TTTATGTGGG Num.seqs=7  
Similarity=0.476190  
0 TTTATGTGTGCCNGTGAANCN

\*\*\*\*\*  
Consensus:

TTTATGTGTGCCNGTGAANCN

>Bacillus\_Fam\_1825\_21\_1 Nr. of seq. 1 Alignment length(with gaps) = 21  
Alignment score = 0.000000  
GCF\_001591445.1\_ASM159144v1\_genomic.fna\_5:214153-214237 Satlength=85 Nr  
of Repeats=4 RepeatLength=21 seed=CCGAAACCTG Num.seqs=4  
Similarity=0.904762  
0 CCGAAACCTGGGCCTCCTGGG

\*\*\*\*\*  
Consensus:

CCGAAACCTGGGCCTCCTGGG

>Bacillus\_Fam\_1826\_21\_1 Nr. of seq. 1 Alignment length(with gaps) = 21  
Alignment score = 0.000000  
GCF\_001591465.1\_ASM159146v1\_genomic.fna\_19:29474-29577 Satlength=104 Nr  
of Repeats=5 RepeatLength=21 seed=TGCAAATAGA Num.seqs=3  
Similarity=0.497585  
0 TGCAAATAGAANGCANGAATN

\*\*\*\*\*  
Consensus:

TGCAAATAGAANGCANGAATN

>Bacillus\_Fam\_1827\_21\_1 Nr. of seq. 1 Alignment length(with gaps) = 21  
Alignment score = 0.000000  
GCF\_001591465.1\_ASM159146v1\_genomic.fna\_20:25050-25133 Satlength=84 Nr of  
Repeats=4 RepeatLength=21 seed=TTTGGCCGGT Num.seqs=3 Similarity=0.585859  
0 TTTGGCCGGTAAATTATGCAN

\*\*\*\*\*  
Consensus:

TTTGGCCGGTAAATTATGCAN

>Bacillus\_Fam\_1828\_21\_1 Nr. of seq. 1 Alignment length(with gaps) = 21  
Alignment score = 0.000000  
GCF\_001591565.1\_ASM159156v1\_genomic.fna\_44:15843-15969 Satlength=127 Nr  
of Repeats=4 RepeatLength=21 seed=GAAGCTCTTC Num.seqs=3  
Similarity=0.746032  
0 GAAGCTCTTCGGACTGCGTTT

\*\*\*\*\*  
Consensus:

GAAGCTCTTCGGACTGCGTTT

>Bacillus\_Fam\_1829\_21\_1 Nr. of seq. 1 Alignment length(with gaps) = 21  
Alignment score = 0.000000  
GCF\_001591585.1\_ASM159158v1\_genomic.fna\_5:250479-251099 Satlength=621 Nr  
of Repeats=9 RepeatLength=21 seed=TATCAGCCAA Num.seqs=8  
Similarity=0.826028  
0 TATCAGCCAAACTCGAGGGCT

\*\*\*\*\*  
Consensus:

TATCAGCCAAACTCGAGGGCT

>Bacillus\_Fam\_1830\_21\_1 Nr. of seq. 1 Alignment length(with gaps) = 21  
Alignment score = 0.000000  
GCF\_001591665.1\_ASM159166v1\_genomic.fna\_56:43606-43761 Satlength=156 Nr  
of Repeats=5 RepeatLength=21 seed=AAATAGGTAG Num.seqs=4  
Similarity=0.756614  
0 AAATAGGTAGTAAGTGACCAT

\*\*\*\*\*  
Consensus:

AAATAGGTAGTAAGTGACCAT

>Bacillus\_Fam\_1831\_21\_1 Nr. of seq. 1 Alignment length(with gaps) = 21  
Alignment score = 0.000000  
GCF\_001591805.1\_ASM159180v1\_genomic.fna\_38:45950-46055 Satlength=106 Nr  
of Repeats=5 RepeatLength=21 seed=TTTTGTTGAA Num.seqs=5

Similarity=0.703030  
0 TTTTGTTGAATGGCACCTGGT

\*\*\*\*\*

Consensus:

TTTTGTTGAATGGCACCTGGT

>Bacillus\_Fam\_1832\_21\_1 Nr. of seq. 1 Alignment length(with gaps) = 21  
Alignment score = 0.000000  
GCF\_001592005.1\_ASM159200v1\_genomic.fna\_23:5049-5133 Satlength=85 Nr of  
Repeats=4 RepeatLength=21 seed=CGCCTTGACG Num.seqs=4 Similarity=0.915344  
0 CGCCTTGACGGACTAGACCAA

\*\*\*\*\*

Consensus:

CGCCTTGACGGACTAGACCAA

>Bacillus\_Fam\_1833\_21\_1 Nr. of seq. 1 Alignment length(with gaps) = 21  
Alignment score = 0.000000  
GCF\_001636315.1\_ASM163631v1\_genomic.fna\_1:2331927-2332076 Satlength=150  
Nr of Repeats=6 RepeatLength=21 seed=TTAGCGATTT Num.seqs=5  
Similarity=0.606349 0  
TTAGCGATTTNANACNGCCTA

\*\*\*\*\*

Consensus:

TTAGCGATTTNANACNGCCTA

>Bacillus\_Fam\_1834\_21\_1 Nr. of seq. 1 Alignment length(with gaps) = 21  
Alignment score = 0.000000  
GCF\_001636315.1\_ASM163631v1\_genomic.fna\_1:5159452-5159597 Satlength=146  
Nr of Repeats=6 RepeatLength=21 seed=GACGGGTAAA Num.seqs=5  
Similarity=0.568182 0  
GACGGGTAAAATCNAAAANTT

\*\*\*\*\*

Consensus:

GACGGGTAAAATCNAAAANTT

>Bacillus\_Fam\_1835\_21\_1 Nr. of seq. 1 Alignment length(with gaps) = 21  
Alignment score = 0.000000  
GCF\_001636335.1\_ASM163633v1\_genomic.fna\_1:60506-60879 Satlength=374 Nr of  
Repeats=18 RepeatLength=21 seed=GGCGAATAAA Num.seqs=15  
Similarity=0.855480  
0 GGCGAATAAAACAGTGAGCAT

\*\*\*\*\*

Consensus:

GGCGAATAAAACAGTGAGCAT



>Bacillus\_Fam\_1836\_21\_1 Nr. of seq. 1 Alignment length(with gaps) = 21  
Alignment score = 0.000000  
GCF\_001636345.1\_ASM163634v1\_genomic.fna\_1:402480-402564 Satlength=85 Nr  
of Repeats=4 RepeatLength=21 seed=TCCTATCAA Num.seqs=4  
Similarity=0.474638  
0 TCCTATCAAAANAAGCGGAC

\*\*\*\*\*

Consensus:

TCCTATCAAAANAAGCGGAC

>Bacillus\_Fam\_1837\_21\_1 Nr. of seq. 1 Alignment length(with gaps) = 21  
Alignment score = 0.000000  
GCF\_001636345.1\_ASM163634v1\_genomic.fna\_1:537147-537252 Satlength=106 Nr  
of Repeats=4 RepeatLength=21 seed=AATGATCGAA Num.seqs=3  
Similarity=0.536232  
0 AATGATCGAAANATCTCNAN

\*\*\*\*\*

Consensus:

AATGATCGAAANATCTCNAN

>Bacillus\_Fam\_1838\_21\_1 Nr. of seq. 1 Alignment length(with gaps) = 21  
Alignment score = 0.000000  
GCF\_001636425.1\_ASM163642v1\_genomic.fna\_1:4338946-4339051 Satlength=106  
Nr of Repeats=5 RepeatLength=21 seed=AAATGTTGCA Num.seqs=3  
Similarity=0.703704  
AAATGTTGCACAAAAACGAAA

0

\*\*\*\*\*

Consensus:

AAATGTTGCACAAAAACGAAA

>Bacillus\_Fam\_1839\_21\_1 Nr. of seq. 1 Alignment length(with gaps) = 21  
Alignment score = 0.000000  
GCF\_001645685.2\_ASM164568v2\_genomic.fna\_1:4195211-4195333 Satlength=123  
Nr of Repeats=5 RepeatLength=21 seed=GGACGAATTA Num.seqs=4  
Similarity=0.765152  
GGACGAATTATCTCCTGATTG

0

\*\*\*\*\*

Consensus:

GGACGAATTATCTCCTGATTG

>Bacillus\_Fam\_1840\_21\_1 Nr. of seq. 1 Alignment length(with gaps) = 21  
Alignment score = 0.000000  
GCF\_001645705.1\_ASM164570v1\_genomic.fna\_58:251245-252259 Satlength=1015  
Nr of Repeats=41 RepeatLength=21 seed=ATTGCGCAAC Num.seqs=25

Similarity=0.654747 0  
ATTGCGCGACTTTCATNTGGN

\*\*\*\*\*  
Consensus:

ATTGCGCGACTTTCATNTGGN

>Bacillus\_Fam\_1841\_21\_1 Nr. of seq. 1 Alignment length(with gaps) = 21  
Alignment score = 0.000000  
GCF\_001645705.1\_ASM164570v1\_genomic.fna\_61:116393-116850 Satlength=458 Nr  
of Repeats=22 RepeatLength=21 seed=AGTCGCGCAA Num.seqs=18  
Similarity=0.733908 0  
AGTCGCGCAATGCAGGTATAA

\*\*\*\*\*  
Consensus:

AGTCGCGCAATGCAGGTATAA

>Bacillus\_Fam\_1842\_21\_1 Nr. of seq. 1 Alignment length(with gaps) = 21  
Alignment score = 0.000000  
GCF\_001648575.1\_ASM164857v1\_genomic.fna\_55:22587-22754 Satlength=168 Nr  
of Repeats=6 RepeatLength=21 seed=TGACGGGATT Num.seqs=5  
Similarity=0.506061  
0 TGACGGGATTNCCNNTTCTTA

\*\*\*\*\*  
Consensus:

TGACGGGATTNCCNNTTCTTA

>Bacillus\_Fam\_1843\_21\_1 Nr. of seq. 1 Alignment length(with gaps) = 21  
Alignment score = 0.000000  
GCF\_001648575.1\_ASM164857v1\_genomic.fna\_61:58107-58295 Satlength=189 Nr  
of Repeats=6 RepeatLength=21 seed=TGAAGGGATT Num.seqs=4  
Similarity=0.502645  
0 TGAAGGGATTTTNCACACTTG

\*\*\*\*\*  
Consensus:

TGAAGGGATTTTNCACACTTG

>Bacillus\_Fam\_1844\_21\_1 Nr. of seq. 1 Alignment length(with gaps) = 21  
Alignment score = 0.000000  
GCF\_001648575.1\_ASM164857v1\_genomic.fna\_64:41402-41486 Satlength=85 Nr of  
Repeats=4 RepeatLength=21 seed=GCACGAACTC Num.seqs=4 Similarity=0.968254  
0 GCACGAACTCCGAGCGTTTCC

\*\*\*\*\*  
Consensus:

GCACGAACTCCGAGCGTTTCC

>Bacillus\_Fam\_1845\_21\_1 Nr. of seq. 1 Alignment length(with gaps) = 21  
Alignment score = 0.000000  
GCF\_001712755.1\_ASM171275v1\_genomic.fna\_2:319626-319913 Satlength=288 Nr  
of Repeats=11 RepeatLength=21 seed=TGCAAATAAA Num.seqs=7  
Similarity=0.477460 0  
TGCAAATAAAANTNNTCAAGN

\*\*\*\*\*

Consensus:

TGCAAATAAAANTNNTCAAGN

>Bacillus\_Fam\_1846\_21\_1 Nr. of seq. 1 Alignment length(with gaps) = 21  
Alignment score = 0.000000  
GCF\_001712755.1\_ASM171275v1\_genomic.fna\_36:229235-229442 Satlength=208 Nr  
of Repeats=10 RepeatLength=21 seed=TTATTTGCAG Num.seqs=9  
Similarity=0.379630 0  
TTATTTGCAGNNTTNAATNTN

\*\*\*\*\*

Consensus:

TTATTTGCAGNNTTNAATNTN

>Bacillus\_Fam\_1847\_21\_1 Nr. of seq. 1 Alignment length(with gaps) = 21  
Alignment score = 0.000000  
GCF\_001889165.1\_ASM188916v1\_genomic.fna\_1:3543299-3543404 Satlength=106  
Nr of Repeats=5 RepeatLength=21 seed=TTTATTTTCG Num.seqs=5  
Similarity=0.520833 0  
TTTATTTTCGNNTTTCCTNGT

\*\*\*\*\*

Consensus:

TTTATTTTCGNNTTTCCTNGT

>Bacillus\_Fam\_1848\_21\_1 Nr. of seq. 1 Alignment length(with gaps) = 21  
Alignment score = 0.000000  
GCF\_001889165.1\_ASM188916v1\_genomic.fna\_1:3636446-3636551 Satlength=106  
Nr of Repeats=4 RepeatLength=21 seed=TTTATTTTCG Num.seqs=3  
Similarity=0.512077 0  
TTTATTTTCGNNTTCTACGCA

\*\*\*\*\*

Consensus:

TTTATTTTCGNNTTCTACGCA

>Bacillus\_Fam\_1849\_21\_1 Nr. of seq. 1 Alignment length(with gaps) = 21  
Alignment score = 0.000000  
GCF\_002009555.1\_ASM200955v1\_genomic.fna\_561:6003-6229 Satlength=227 Nr of  
Repeats=8 RepeatLength=21 seed=TCGTGCGAAT Num.seqs=5 Similarity=0.654545  
0 TCGTGCGAATCATNTCGGAAT

\*\*\*\*\*

Consensus:

TCGTGCGAATCATNTCGGAAT

>Bacillus\_Fam\_1850\_21\_1 Nr. of seq. 1 Alignment length(with gaps) = 21  
Alignment score = 0.000000  
GCF\_002019645.1\_ASM201964v1\_genomic.fna\_1:2245902-2246234 Satlength=333  
Nr of Repeats=9 RepeatLength=21 seed=AATCCGGCGG Num.seqs=6  
Similarity=0.548000 0  
AATCCGGCGGATNTGAAGCAG

\*\*\*\*\*

Consensus:

AATCCGGCGGATNTGAAGCAG

>Bacillus\_Fam\_1851\_21\_1 Nr. of seq. 1 Alignment length(with gaps) = 21  
Alignment score = 0.000000  
GCF\_002019665.1\_ASM201966v1\_genomic.fna\_1:767787-767892 Satlength=106 Nr  
of Repeats=4 RepeatLength=21 seed=ATTCGTCCAA Num.seqs=3  
Similarity=0.564815  
0 ATTCGTCCAAAATCCNGTAAC

\*\*\*\*\*

Consensus:

ATTCGTCCAAAATCCNGTAAC

>Bacillus\_Fam\_1852\_21\_1 Nr. of seq. 1 Alignment length(with gaps) = 21  
Alignment score = 0.000000  
GCF\_002019665.1\_ASM201966v1\_genomic.fna\_1:1184140-1184299 Satlength=160  
Nr of Repeats=6 RepeatLength=21 seed=TTGGACGAAT Num.seqs=5  
Similarity=0.528986 0  
TTGGACGAATNAGNGCGNGAA

\*\*\*\*\*

Consensus:

TTGGACGAATNAGNGCGNGAA

>Bacillus\_Fam\_1853\_21\_1 Nr. of seq. 1 Alignment length(with gaps) = 21  
Alignment score = 0.000000  
GCF\_900094975.1\_IMG-  
taxon\_2617270721\_annotated\_assembly\_genomic.fna\_9:8023-8157 Satlength=135  
Nr of Repeats=4 RepeatLength=21 seed=TATTATCGAA Num.seqs=3  
Similarity=0.550725 0  
TATTATCGAAATCNANAAATT

\*\*\*\*\*

Consensus:

TATTATCGAAATCNANAAATT

>Bacillus\_Fam\_1854\_21\_1 Nr. of seq. 1 Alignment length(with gaps) = 21  
Alignment score = 0.000000  
GCF\_900094975.1\_IMG-  
taxon\_2617270721\_annotated\_assembly\_genomic.fna\_13:445117-445197  
Satlength=81 Nr of Repeats=4 RepeatLength=20 seed=GGCGCAATTA Num.seqs=4  
Similarity=0.576720 0 GGCGCAATTAATTAGANAGTN

\*\*\*\*\*

Consensus:

GGCGCAATTAATTAGANAGTN

>Bacillus\_Fam\_1855\_21\_1 Nr. of seq. 1 Alignment length(with gaps) = 21  
Alignment score = 0.000000  
GCF\_900103955.1\_IMG-  
taxon\_2617270767\_annotated\_assembly\_genomic.fna\_27:91618-91930  
Satlength=313 Nr of Repeats=5 RepeatLength=21 seed=TTAGATGTTA Num.seqs=4  
Similarity=0.798942 0 TTAGATGTTAGTATAGCGTGT

\*\*\*\*\*

Consensus:

TTAGATGTTAGTATAGCGTGT

>Bacillus\_Fam\_1856\_21\_1 Nr. of seq. 1 Alignment length(with gaps) = 21  
Alignment score = 0.000000  
GCF\_900107275.1\_IMG-  
taxon\_2675903024\_annotated\_assembly\_genomic.fna\_11:61167-61272  
Satlength=106 Nr of Repeats=5 RepeatLength=21 seed=TCGTCTTCTT Num.seqs=5  
Similarity=0.898413 0 TCGTCTTCTTCATGCGCGTGA

\*\*\*\*\*

Consensus:

TCGTCTTCTTCATGCGCGTGA

>Bacillus\_Fam\_1857\_21\_1 Nr. of seq. 1 Alignment length(with gaps) = 21  
Alignment score = 0.000000  
GCF\_900107275.1\_IMG-  
taxon\_2675903024\_annotated\_assembly\_genomic.fna\_35:83306-83474  
Satlength=169 Nr of Repeats=8 RepeatLength=21 seed=CGGCTTGGA Num.seqs=8  
Similarity=0.768707 0 CGGCTTGGAACAAAGTCGA

\*\*\*\*\*

Consensus:

CGGCTTGGAACAAAGTCGA

>Bacillus\_Fam\_1858\_21\_1 Nr. of seq. 1 Alignment length(with gaps) = 21  
Alignment score = 0.000000  
GCF\_900156865.1\_PRJEB18960\_genomic.fna\_3:2979413-2979928 Satlength=516 Nr  
of Repeats=15 RepeatLength=21 seed=TTATGGGACA Num.seqs=11

Similarity=0.639669 0  
TTATGGGACACTGGTTTCATN

\*\*\*\*\*  
Consensus:

TTATGGGACACTGGTTTCATN

>Bacillus\_Fam\_1859\_21\_1 Nr. of seq. 1 Alignment length(with gaps) = 21  
Alignment score = 0.000000  
GCF\_900156875.1\_PRJEB18969\_genomic.fna\_11:3145660-3145883 Satlength=224  
Nr of Repeats=5 RepeatLength=21 seed=TTCATTTCTT Num.seqs=4  
Similarity=0.756614 0  
TTCATTTCTTGTAGATCCCGC

\*\*\*\*\*  
Consensus:

TTCATTTCTTGTAGATCCCGC

>Bacillus\_Fam\_1860\_20\_1 Nr. of seq. 1 Alignment length(with gaps) = 20  
Alignment score = 0.000000  
GCF\_000175075.1\_ASM17507v1\_genomic.fna\_29:81534-81653 Satlength=120 Nr of  
Repeats=6 RepeatLength=20 seed=TTTCTTGATA Num.seqs=5 Similarity=0.561905  
0 TTTCTTGATATANTGTNAAT

\*\*\*\*\*  
Consensus:

TTTCTTGATATANTGTNAAT

>Bacillus\_Fam\_1861\_20\_1 Nr. of seq. 1 Alignment length(with gaps) = 20  
Alignment score = 0.000000  
GCF\_000285535.1\_ASM28553v1\_genomic.fna\_2:955930-956292 Satlength=363 Nr  
of Repeats=14 RepeatLength=20 seed=TTTGCGTCAA Num.seqs=9  
Similarity=0.588183  
0 TTTGCGTCAACANCCACAGA

\*\*\*\*\*  
Consensus:

TTTGCGTCAACANCCACAGA

>Bacillus\_Fam\_1862\_20\_1 Nr. of seq. 1 Alignment length(with gaps) = 20  
Alignment score = 0.000000  
GCF\_000285535.1\_ASM28553v1\_genomic.fna\_60:15-376 Satlength=362 Nr of  
Repeats=18 RepeatLength=20 seed=ATTGCGTCT Num.seqs=17  
Similarity=0.590463  
0 ATTGCGTCNNTTCCNNCNG

\*\*\*\*\*  
Consensus:

ATTGCGTCNNTTCCNNCNG

>Bacillus\_Fam\_1863\_20\_1 Nr. of seq. 1 Alignment length(with gaps) = 20  
Alignment score = 0.000000  
GCF\_000331575.1\_ASM33157v1\_genomic.fna\_1:1625853-1626033 Satlength=181 Nr  
of Repeats=9 RepeatLength=20 seed=TAATGAGGGT Num.seqs=9  
Similarity=0.974074 0  
TAATGAGGGTATTAACTTT

\*\*\*\*\*

Consensus:

TAATGAGGGTATTAACTTT

>Bacillus\_Fam\_1864\_20\_1 Nr. of seq. 1 Alignment length(with gaps) = 20  
Alignment score = 0.000000  
GCF\_000429705.1\_ASM42970v1\_genomic.fna\_2:323368-323473 Satlength=106 Nr  
of Repeats=5 RepeatLength=21 seed=TTATCCATCA Num.seqs=3  
Similarity=0.666667  
0 TTATCCATCACTTCGGCCGG

\*\*\*\*\*

Consensus:

TTATCCATCACTTCGGCCGG

>Bacillus\_Fam\_1865\_20\_1 Nr. of seq. 1 Alignment length(with gaps) = 20  
Alignment score = 0.000000  
GCF\_000612665.1\_FF4\_genomic.fna\_66:43632-44026 Satlength=395 Nr of  
Repeats=8 RepeatLength=21 seed=TTTACCGGCA Num.seqs=5 Similarity=0.461728  
0 TTTACCGGCACTTTCACNAT

\*\*\*\*\*

Consensus:

TTTACCGGCACTTTCACNAT

>Bacillus\_Fam\_1866\_20\_1 Nr. of seq. 1 Alignment length(with gaps) = 20  
Alignment score = 0.000000  
GCF\_000752035.1\_Bacillus\_rubiinfantis\_genomic.fna\_13:80293-80396  
Satlength=104 Nr of Repeats=5 RepeatLength=20 seed=GTTACTTGCG Num.seqs=3  
Similarity=0.592593 0  
TTACTTGCGGTTGGGGNGCG

\*\*\*\*\*

Consensus:

TTACTTGCGGTTGGGGNGCG

>Bacillus\_Fam\_1867\_20\_1 Nr. of seq. 1 Alignment length(with gaps) = 20  
Alignment score = 0.000000  
GCF\_000752395.1\_Bacillus\_andreraoultii\_genomic.fna\_12:210479-210580  
Satlength=102 Nr of Repeats=5 RepeatLength=20 seed=TTTCCGAAGT Num.seqs=4  
Similarity=0.562169 0  
TTTCCGAAGTTGGCGTGT

\*\*\*\*\*

Consensus:

TTTCCGAAGTTGGCGTGTTT

>Bacillus\_Fam\_1868\_20\_1 Nr. of seq. 1 Alignment length(with gaps) = 20  
Alignment score = 0.000000  
GCF\_000759675.1\_ASM75967v1\_genomic.fna\_13:139600-139845 Satlength=246 Nr  
of Repeats=5 RepeatLength=20 seed=TTTACGTGCC Num.seqs=4  
Similarity=0.593915  
0 TTTACGTGCCAAATTATAGA

\*\*\*\*\*

Consensus:

TTTACGTGCCAAATTATAGA

>Bacillus\_Fam\_1869\_20\_1 Nr. of seq. 1 Alignment length(with gaps) = 20  
Alignment score = 0.000000  
GCF\_001420595.1\_ASM142059v1\_genomic.fna\_11:1231069-1231171 Satlength=103  
Nr of Repeats=5 RepeatLength=20 seed=TATTTGCAAA Num.seqs=3  
Similarity=0.644444 0  
TAATTGCAAAAATCCTTGAA

\*\*\*\*\*

Consensus:

TAATTGCAAAAATCCTTGAA

>Bacillus\_Fam\_1870\_20\_1 Nr. of seq. 1 Alignment length(with gaps) = 20  
Alignment score = 0.000000  
GCF\_001420715.1\_ASM142071v1\_genomic.fna\_22:116628-116728 Satlength=101 Nr  
of Repeats=5 RepeatLength=20 seed=TACATTAAAG Num.seqs=5  
Similarity=0.933333 0  
TACATTAAAGTTCACACTT

\*\*\*\*\*

Consensus:

TACATTAAAGTTCACACTT

>Bacillus\_Fam\_1871\_20\_1 Nr. of seq. 1 Alignment length(with gaps) = 20  
Alignment score = 0.000000  
GCF\_001636325.1\_ASM163632v1\_genomic.fna\_2:476021-476159 Satlength=139 Nr  
of Repeats=6 RepeatLength=20 seed=GGCGCAAAAA Num.seqs=5  
Similarity=0.590909  
0 GGCGCAAAAATCGAATGAGA

\*\*\*\*\*

Consensus:

GGCGCAAAAATCGAATGAGA



>Bacillus\_Fam\_1872\_20\_1 Nr. of seq. 1 Alignment length(with gaps) = 20  
Alignment score = 0.000000  
GCF\_001636345.1\_ASM163634v1\_genomic.fna\_1:867035-867350 Satlength=316 Nr  
of Repeats=4 RepeatLength=20 seed=GCGAATATAT Num.seqs=3  
Similarity=0.600000  
0 GCGAATATATTCNTATNACG

\*\*\*\*\*

Consensus:

GCGAATATATTCNTATNACG

>Bacillus\_Fam\_1873\_20\_1 Nr. of seq. 1 Alignment length(with gaps) = 20  
Alignment score = 0.000000  
GCF\_001645685.2\_ASM164568v2\_genomic.fna\_1:349315-349619 Satlength=305 Nr  
of Repeats=14 RepeatLength=20 seed=CGAATAAATC Num.seqs=9  
Similarity=0.758377 0  
CGAATAAATCAGAGTAAGGT

\*\*\*\*\*

Consensus:

CGAATAAATCAGAGTAAGGT

>Bacillus\_Fam\_1874\_20\_1 Nr. of seq. 1 Alignment length(with gaps) = 20  
Alignment score = 0.000000  
GCF\_001648575.1\_ASM164857v1\_genomic.fna\_64:202939-203079 Satlength=141 Nr  
of Repeats=6 RepeatLength=20 seed=TTATCCTGAA Num.seqs=5  
Similarity=0.760000 0  
TTATCCTGAAATCTATGGGT

\*\*\*\*\*

Consensus:

TTATCCTGAAATCTATGGGT

>Bacillus\_Fam\_1875\_20\_1 Nr. of seq. 1 Alignment length(with gaps) = 20  
Alignment score = 0.000000  
GCF\_001648575.1\_ASM164857v1\_genomic.fna\_66:119260-119427 Satlength=168 Nr  
of Repeats=6 RepeatLength=21 seed=TGACGGGATT Num.seqs=5  
Similarity=0.461538 0  
TGACGGGATTTTAGTNGTTA

\*\*\*\*\*

Consensus:

TGACGGGATTTTAGTNGTTA

>Bacillus\_Fam\_1876\_20\_1 Nr. of seq. 1 Alignment length(with gaps) = 20  
Alignment score = 0.000000  
GCF\_001648575.1\_ASM164857v1\_genomic.fna\_67:289399-289588 Satlength=190 Nr  
of Repeats=8 RepeatLength=21 seed=ATTGTGACTT Num.seqs=7  
Similarity=0.590608 0  
ATTGTGACTTTTCCATNGTT

\*\*\*\*\*

Consensus:

ATTGTGACTTTTCCATNGTT

>Bacillus\_Fam\_1877\_20\_1 Nr. of seq. 1 Alignment length(with gaps) = 20

Alignment score = 0.000000

GCF\_001887185.1\_ASM188718v1\_genomic.fna\_259:169310-169414 Satlength=105

Nr of Repeats=4 RepeatLength=20 seed=CGAGTTTTTT Num.seqs=3

Similarity=0.671958

0

CGAGTTTTTTTAGGTCAGGAG

\*\*\*\*\*

Consensus:

CGAGTTTTTTTAGGTCAGGAG

>Bacillus\_Fam\_1878\_20\_1 Nr. of seq. 1 Alignment length(with gaps) = 20

Alignment score = 0.000000

GCF\_002019665.1\_ASM201966v1\_genomic.fna\_1:4193194-4193625 Satlength=432

Nr of Repeats=21 RepeatLength=21 seed=TTTATGAGCC Num.seqs=16

Similarity=0.603684

0

TTTATGAGCCANTACCTCTN

\*\*\*\*\*

Consensus:

TTTATGAGCCANTACCTCTN

>Bacillus\_Fam\_1879\_20\_1 Nr. of seq. 1 Alignment length(with gaps) = 20

Alignment score = 0.000000

GCF\_002019705.1\_ASM201970v1\_genomic.fna\_1:2674002-2674287 Satlength=286

Nr of Repeats=14 RepeatLength=20 seed=CCTGAGCTCC Num.seqs=9

Similarity=0.874074

0

CCTGAGCTCCTCTCTCTAAT

\*\*\*\*\*

Consensus:

CCTGAGCTCCTCTCTCTAAT

>Bacillus\_Fam\_1880\_20\_1 Nr. of seq. 1 Alignment length(with gaps) = 20

Alignment score = 0.000000

GCF\_900103955.1\_IMG-

taxon\_2617270767\_annotated\_assembly\_genomic.fna\_7:15309-15864

Satlength=556 Nr of Repeats=5 RepeatLength=20 seed=AGTAAAATAG Num.seqs=3

Similarity=0.955556

0 AGTAAAATAGCGGGCGCGAC

\*\*\*\*\*

Consensus:

AGTAAAATAGCGGGCGCGAC

>Bacillus\_Fam\_1881\_20\_1 Nr. of seq. 1 Alignment length(with gaps) = 20  
Alignment score = 0.000000  
GCF\_900156875.1\_PRJEB18969\_genomic.fna\_11:3436401-3436481 Satlength=81 Nr  
of Repeats=4 RepeatLength=20 seed=TTTATCCGTA Num.seqs=4  
Similarity=0.547980 0  
TTTATCCGTAAGAATTTTCAN

\*\*\*\*\*

Consensus:

TTTATCCGTAAGAATTTTCAN

>Bacillus\_Fam\_1882\_19\_1 Nr. of seq. 1 Alignment length(with gaps) = 19  
Alignment score = 0.000000  
GCF\_000331575.1\_ASM33157v1\_genomic.fna\_1:1363446-1363522 Satlength=77 Nr  
of Repeats=4 RepeatLength=19 seed=TATATTCTCT Num.seqs=4  
Similarity=0.918129  
0 TATATTCTCTACGTTATTA

\*\*\*\*\*

Consensus:

TATATTCTCTACGTTATTA

>Bacillus\_Fam\_1883\_19\_1 Nr. of seq. 1 Alignment length(with gaps) = 19  
Alignment score = 0.000000  
GCF\_000331575.1\_ASM33157v1\_genomic.fna\_1:1618267-1618343 Satlength=77 Nr  
of Repeats=4 RepeatLength=19 seed=CTTGATTGAG Num.seqs=4  
Similarity=0.929825  
0 CTTGATTGAGAATCCTCAG

\*\*\*\*\*

Consensus:

CTTGATTGAGAATCCTCAG

>Bacillus\_Fam\_1884\_19\_1 Nr. of seq. 1 Alignment length(with gaps) = 19  
Alignment score = 0.000000  
GCF\_001889165.1\_ASM188916v1\_genomic.fna\_1:874722-874938 Satlength=217 Nr  
of Repeats=9 RepeatLength=18 seed=TCATCCTCAG Num.seqs=6  
Similarity=0.696491  
0 TCATCCTCAGAATGAGTGC

\*\*\*\*\*

Consensus:

TCATCCTCAGAATGAGTGC

>Bacillus\_Fam\_1885\_18\_1 Nr. of seq. 1 Alignment length(with gaps) = 18  
Alignment score = 0.000000  
GCF\_000005825.2\_ASM582v2\_genomic.fna\_1:3039924-3040044 Satlength=121 Nr  
of Repeats=6 RepeatLength=18 seed=GGCAATGGAA Num.seqs=5  
Similarity=1.000000  
0 GGCAATGGAAACGGGAAT

\*\*\*\*\*

Consensus:

GGCAATGGAAACGGGAAT

>Bacillus\_Fam\_1886\_18\_1 Nr. of seq. 1 Alignment length(with gaps) = 18  
Alignment score = 0.000000  
GCF\_000008505.1\_ASM850v1\_genomic.fna\_1:4344849-4345011 Satlength=163 Nr  
of Repeats=9 RepeatLength=18 seed=CGTCTGGTTG Num.seqs=9  
Similarity=0.909465  
0 CGTCTGGTTGTTTGTCTC

\*\*\*\*\*

Consensus:

CGTCTGGTTGTTTGTCTC

>Bacillus\_Fam\_1887\_18\_1 Nr. of seq. 1 Alignment length(with gaps) = 18  
Alignment score = 0.000000  
GCF\_000025805.1\_ASM2580v1\_genomic.fna\_1:1137271-1137343 Satlength=73 Nr  
of Repeats=4 RepeatLength=18 seed=TCAAAACCGT Num.seqs=4  
Similarity=1.000000  
0 TCAAAACCGTAGTTAAGG

\*\*\*\*\*

Consensus:

TCAAAACCGTAGTTAAGG

>Bacillus\_Fam\_1888\_18\_1 Nr. of seq. 1 Alignment length(with gaps) = 18  
Alignment score = 0.000000  
GCF\_000025805.1\_ASM2580v1\_genomic.fna\_1:2256750-2257164 Satlength=415 Nr  
of Repeats=23 RepeatLength=18 seed=CCTGGTATGG Num.seqs=23  
Similarity=0.839054 0  
CCTGGTATGGGCGGATCA

\*\*\*\*\*

Consensus:

CCTGGTATGGGCGGATCA

>Bacillus\_Fam\_1889\_18\_1 Nr. of seq. 1 Alignment length(with gaps) = 18  
Alignment score = 0.000000  
GCF\_000161455.1\_ASM16145v1\_genomic.fna\_1:1820901-1821153 Satlength=253 Nr  
of Repeats=13 RepeatLength=18 seed=TGTGTTTACG Num.seqs=12  
Similarity=0.852974 0  
TGTGTTTACGGCATGTTG

\*\*\*\*\*

Consensus:

TGTGTTTACGGCATGTTG

>Bacillus\_Fam\_1890\_18\_1 Nr. of seq. 1 Alignment length(with gaps) = 18  
Alignment score = 0.000000  
GCF\_000161455.1\_ASM16145v1\_genomic.fna\_1:4034040-4034130 Satlength=91 Nr  
of Repeats=5 RepeatLength=18 seed=TGACCGTGAT Num.seqs=5  
Similarity=0.822222  
0 TGACCGTGATGGACGTGA

\*\*\*\*\*

Consensus:

TGACCGTGATGGACGTGA

>Bacillus\_Fam\_1891\_18\_1 Nr. of seq. 1 Alignment length(with gaps) = 18  
Alignment score = 0.000000  
GCF\_000242895.2\_ASM24289v3\_genomic.fna\_1:1111316-1112777 Satlength=1462  
Nr of Repeats=65 RepeatLength=18 seed=GTTGTCGTCG Num.seqs=47  
Similarity=0.825813 0  
GTTGTCGTCGGTGCGGCN

\*\*\*\*\*

Consensus:

GTTGTCGTCGGTGCGGCN

>Bacillus\_Fam\_1892\_18\_1 Nr. of seq. 1 Alignment length(with gaps) = 18  
Alignment score = 0.000000  
GCF\_000292245.2\_ASM29224v2\_genomic.fna\_57:3327-3507 Satlength=181 Nr of  
Repeats=10 RepeatLength=18 seed=GTAACTGAG Num.seqs=10  
Similarity=0.965432  
0 GTAACTGAGGAAGAAGG

\*\*\*\*\*

Consensus:

GTAACTGAGGAAGAAGG

>Bacillus\_Fam\_1893\_18\_1 Nr. of seq. 1 Alignment length(with gaps) = 18  
Alignment score = 0.000000  
GCF\_000307875.1\_BABA1.0\_genomic.fna\_120:4680-4752 Satlength=73 Nr of  
Repeats=4 RepeatLength=18 seed=AAAGAACAAC Num.seqs=4 Similarity=0.851852  
0 AAAGAACAACCAATCATC

\*\*\*\*\*

Consensus:

AAAGAACAACCAATCATC

>Bacillus\_Fam\_1894\_18\_1 Nr. of seq. 1 Alignment length(with gaps) = 18  
Alignment score = 0.000000  
GCF\_000321185.1\_ASM32118v1\_genomic.fna\_87:138564-139038 Satlength=475 Nr  
of Repeats=26 RepeatLength=18 seed=GATGCCTGGT Num.seqs=25  
Similarity=0.892839 0  
GATGCCTGGTGGTGAAT

\*\*\*\*\*

Consensus:

GATGCCTGGTGGTGAAT

>Bacillus\_Fam\_1895\_18\_1 Nr. of seq. 1 Alignment length(with gaps) = 18  
Alignment score = 0.000000  
GCF\_000331575.1\_ASM33157v1\_genomic.fna\_4:14090-14162 Satlength=73 Nr of  
Repeats=4 RepeatLength=18 seed=TAATTAGTTA Num.seqs=4 Similarity=0.802469  
0 TAATTAGTTACCAAGCAA

\*\*\*\*\*

Consensus:

TAATTAGTTACCAAGCAA

>Bacillus\_Fam\_1896\_18\_1 Nr. of seq. 1 Alignment length(with gaps) = 18  
Alignment score = 0.000000  
GCF\_000429725.1\_ASM42972v1\_genomic.fna\_19:52932-53076 Satlength=145 Nr of  
Repeats=8 RepeatLength=18 seed=TGCTGCTGAA Num.seqs=8 Similarity=0.928571  
0 TGCTGCTGAAGAGCAGGC

\*\*\*\*\*

Consensus:

TGCTGCTGAAGAGCAGGC

>Bacillus\_Fam\_1897\_18\_1 Nr. of seq. 1 Alignment length(with gaps) = 18  
Alignment score = 0.000000  
GCF\_000430765.1\_ASM43076v1\_genomic.fna\_12:155300-155504 Satlength=205 Nr  
of Repeats=10 RepeatLength=18 seed=GGAAAGAGAA Num.seqs=9  
Similarity=0.843621  
GGAAAGAGAACGCGAGCG 0

\*\*\*\*\*

Consensus:

GGAAAGAGAACGCGAGCG

>Bacillus\_Fam\_1898\_18\_1 Nr. of seq. 1 Alignment length(with gaps) = 18  
Alignment score = 0.000000  
GCF\_000430785.1\_ASM43078v1\_genomic.fna\_4:98178-98286 Satlength=109 Nr of  
Repeats=6 RepeatLength=18 seed=CATCTAAACC Num.seqs=6 Similarity=0.876543  
0 CATCTAAACCAACTACAG

\*\*\*\*\*

Consensus:

CATCTAAACCAACTACAG

>Bacillus\_Fam\_1899\_18\_1 Nr. of seq. 1 Alignment length(with gaps) = 18  
Alignment score = 0.000000

GCF\_000430785.1\_ASM43078v1\_genomic.fna\_13:56715-57603 Satlength=889 Nr of  
Repeats=13 RepeatLength=18 seed=AGAGCGTTTA Num.seqs=9  
Similarity=0.905350  
0 AGAGCGTTTAGACTGCTT

\*\*\*\*\*

Consensus:

AGAGCGTTTAGACTGCTT

>Bacillus\_Fam\_1900\_18\_1 Nr. of seq. 1 Alignment length(with gaps) = 18  
Alignment score = 0.000000

GCF\_000496285.1\_ASM49628v1\_genomic.fna\_1:3550735-3550825 Satlength=91 Nr of  
Repeats=5 RepeatLength=18 seed=TATTATGAAT Num.seqs=5  
Similarity=0.911111  
0 TATTATGAATAAAGAATC

\*\*\*\*\*

Consensus:

TATTATGAATAAAGAATC

>Bacillus\_Fam\_1901\_18\_1 Nr. of seq. 1 Alignment length(with gaps) = 18  
Alignment score = 0.000000

GCF\_000706725.1\_ASM70672v1\_genomic.fna\_1:3385744-3385960 Satlength=217 Nr of  
Repeats=10 RepeatLength=18 seed=AGCTCTTGAA Num.seqs=9  
Similarity=0.827160  
AGCTCTTGAAGACGACAC 0

\*\*\*\*\*

Consensus:

AGCTCTTGAAGACGACAC

>Bacillus\_Fam\_1902\_18\_1 Nr. of seq. 1 Alignment length(with gaps) = 18  
Alignment score = 0.000000

GCF\_000712595.1\_ASM71259v1\_genomic.fna\_17:58333-58441 Satlength=109 Nr of  
Repeats=6 RepeatLength=18 seed=CACGGACATC Num.seqs=6 Similarity=0.846914  
0 CACGGACATCACCATGGC

\*\*\*\*\*

Consensus:

CACGGACATCACCATGGC

>Bacillus\_Fam\_1903\_18\_1 Nr. of seq. 1 Alignment length(with gaps) = 18  
Alignment score = 0.000000

GCF\_000712615.1\_ASM71261v1\_genomic.fna\_14:133-205 Satlength=73 Nr of  
Repeats=4 RepeatLength=18 seed=CCTAAGGACC Num.seqs=4 Similarity=0.888889  
0 CCTAAGGACCCTATAGAC

\*\*\*\*\*

Consensus:

CCTAAGGACCCCTATAGAC

>Bacillus\_Fam\_1904\_18\_1 Nr. of seq. 1 Alignment length(with gaps) = 18  
Alignment score = 0.000000  
GCF\_000724485.1\_ASM72448v1\_genomic.fna\_1:375647-375902 Satlength=256 Nr  
of Repeats=14 RepeatLength=18 seed=CCAGGACAGC Num.seqs=13  
Similarity=0.856600  
CCAGGACAGCCAGGCANC

0

\*\*\*\*\*

Consensus:

CCAGGACAGCCAGGCANC

>Bacillus\_Fam\_1905\_18\_1 Nr. of seq. 1 Alignment length(with gaps) = 18  
Alignment score = 0.000000  
GCF\_000751775.1\_A1A\_genomic.fna\_98:19034-19286 Satlength=253 Nr of  
Repeats=14 RepeatLength=18 seed=TCACCTGGTT Num.seqs=14  
Similarity=0.844526  
0 TCACCTGGTTCTTCGTTA

\*\*\*\*\*

Consensus:

TCACCTGGTTCTTCGTTA

>Bacillus\_Fam\_1906\_18\_1 Nr. of seq. 1 Alignment length(with gaps) = 18  
Alignment score = 0.000000  
GCF\_000759675.1\_ASM75967v1\_genomic.fna\_158:156695-156902 Satlength=208 Nr  
of Repeats=8 RepeatLength=18 seed=AGCAGAGGGT Num.seqs=7  
Similarity=0.795414  
AGCAGAGGGTCAAAAGGC

0

\*\*\*\*\*

Consensus:

AGCAGAGGGTCAAAAGGC

>Bacillus\_Fam\_1907\_18\_1 Nr. of seq. 1 Alignment length(with gaps) = 18  
Alignment score = 0.000000  
GCF\_000759675.1\_ASM75967v1\_genomic.fna\_162:138323-138431 Satlength=109 Nr  
of Repeats=6 RepeatLength=18 seed=CACTAGCCGT Num.seqs=6  
Similarity=0.801170  
CACTAGCCGTCGTCGCTT

0

\*\*\*\*\*

Consensus:

CACTAGCCGTCGTCGCTT

>Bacillus\_Fam\_1908\_18\_1 Nr. of seq. 1 Alignment length(with gaps) = 18  
Alignment score = 0.000000



GCF\_000775975.1\_ASM77597v1\_genomic.fna\_1:4349695-4349794 Satlength=100 Nr  
of Repeats=6 RepeatLength=18 seed=TCTTGTTTGT Num.seqs=4  
Similarity=0.913580 0  
TCTTGTTTGTCCCTGTTTA

\*\*\*\*\*

Consensus:

TCTTGTTTGTCCCTGTTTA

>Bacillus\_Fam\_1909\_18\_1 Nr. of seq. 1 Alignment length(with gaps) = 18  
Alignment score = 0.000000

GCF\_001278705.1\_ASM127870v1\_genomic.fna\_1:501198-501288 Satlength=91 Nr  
of Repeats=5 RepeatLength=18 seed=AGCCAGGCC Num.seqs=5  
Similarity=0.925926  
0 AGCCAGGCCCGGATCCGC

\*\*\*\*\*

Consensus:

AGCCAGGCCCGGATCCGC

>Bacillus\_Fam\_1910\_18\_1 Nr. of seq. 1 Alignment length(with gaps) = 18  
Alignment score = 0.000000

GCF\_001315085.1\_ASM131508v1\_genomic.fna\_3:122565-122745 Satlength=181 Nr  
of Repeats=10 RepeatLength=18 seed=AAGCTCTTGG Num.seqs=10  
Similarity=0.965432 0  
AAGCTCTTGGTCTACATC

\*\*\*\*\*

Consensus:

AAGCTCTTGGTCTACATC

>Bacillus\_Fam\_1911\_18\_1 Nr. of seq. 1 Alignment length(with gaps) = 18  
Alignment score = 0.000000

GCF\_001439915.1\_ASM143991v1\_genomic.fna\_83:56856-56928 Satlength=73 Nr of  
Repeats=4 RepeatLength=18 seed=TGGCGTTTGA Num.seqs=4 Similarity=0.888889  
0 TGGCGTTTGATTATTACC

\*\*\*\*\*

Consensus:

TGGCGTTTGATTATTACC

>Bacillus\_Fam\_1912\_18\_1 Nr. of seq. 1 Alignment length(with gaps) = 18  
Alignment score = 0.000000

GCF\_001439915.1\_ASM143991v1\_genomic.fna\_105:175228-175444 Satlength=217  
Nr of Repeats=10 RepeatLength=18 seed=GGATCAGGAA Num.seqs=9  
Similarity=0.893004 0  
GGATCAGGAAACGCGAA

\*\*\*\*\*

Consensus:

GGATCAGGAAACGGCGAA

>Bacillus\_Fam\_1913\_18\_1 Nr. of seq. 1 Alignment length(with gaps) = 18  
Alignment score = 0.000000  
GCF\_001584325.1\_ASM158432v1\_genomic.fna\_11:35994-36075 Satlength=82 Nr of  
Repeats=5 RepeatLength=18 seed=CGTTCGCACC Num.seqs=3 Similarity=0.802469  
0 CGTTCGCACCGTTCGCGT

\*\*\*\*\*  
Consensus:

CGTTCGCACCGTTCGCGT

>Bacillus\_Fam\_1914\_18\_1 Nr. of seq. 1 Alignment length(with gaps) = 18  
Alignment score = 0.000000  
GCF\_001590785.1\_ASM159078v1\_genomic.fna\_7:4154-4364 Satlength=211 Nr of  
Repeats=11 RepeatLength=18 seed=TCATCTCCTC Num.seqs=10  
Similarity=0.957202  
0 TCATCTCCTCCTGTTCCG

\*\*\*\*\*  
Consensus:

TCATCTCCTCCTGTTCCG

>Bacillus\_Fam\_1915\_18\_1 Nr. of seq. 1 Alignment length(with gaps) = 18  
Alignment score = 0.000000  
GCF\_001591665.1\_ASM159166v1\_genomic.fna\_33:162141-162213 Satlength=73 Nr  
of Repeats=4 RepeatLength=18 seed=ATCACTGACA Num.seqs=4  
Similarity=0.888889  
0 ATCACTGACACCATTGAT

\*\*\*\*\*  
Consensus:

ATCACTGACACCATTGAT

>Bacillus\_Fam\_1916\_18\_1 Nr. of seq. 1 Alignment length(with gaps) = 18  
Alignment score = 0.000000  
GCF\_001636425.1\_ASM163642v1\_genomic.fna\_1:588164-588470 Satlength=307 Nr  
of Repeats=12 RepeatLength=18 seed=TGCCTTGACC Num.seqs=11  
Similarity=0.846465  
TGCCTTGACCGCTGCCAT 0

\*\*\*\*\*  
Consensus:

TGCCTTGACCGCTGCCAT

>Bacillus\_Fam\_1917\_18\_1 Nr. of seq. 1 Alignment length(with gaps) = 18  
Alignment score = 0.000000  
GCF\_001645555.1\_ASM164555v1\_genomic.fna\_1:264316-264442 Satlength=127 Nr  
of Repeats=5 RepeatLength=18 seed=GTTGTTCTCA Num.seqs=3

Similarity=0.802469  
0 GTTGTTCCTCAGTTTTTGC

\*\*\*\*\*

Consensus:

GTTGTTCCTCAGTTTTTGC

>Bacillus\_Fam\_1918\_18\_1 Nr. of seq. 1 Alignment length(with gaps) = 18  
Alignment score = 0.000000  
GCF\_001645685.2\_ASM164568v2\_genomic.fna\_1:2895676-2895748 Satlength=73 Nr  
of Repeats=4 RepeatLength=18 seed=GCTGCATTTG Num.seqs=4  
Similarity=0.851852 0  
GCTGCATTTGCGGTGTCG

\*\*\*\*\*

Consensus:

GCTGCATTTGCGGTGTCG

>Bacillus\_Fam\_1919\_18\_1 Nr. of seq. 1 Alignment length(with gaps) = 18  
Alignment score = 0.000000  
GCF\_001648575.1\_ASM164857v1\_genomic.fna\_66:20878-20950 Satlength=73 Nr of  
Repeats=4 RepeatLength=18 seed=TCTTCCATGT Num.seqs=4 Similarity=0.802469  
0 TCTTCCATGTTTGTATCA

\*\*\*\*\*

Consensus:

TCTTCCATGTTTGTATCA

>Bacillus\_Fam\_1920\_18\_1 Nr. of seq. 1 Alignment length(with gaps) = 18  
Alignment score = 0.000000  
GCF\_001712755.1\_ASM171275v1\_genomic.fna\_1:278428-278518 Satlength=91 Nr  
of Repeats=4 RepeatLength=18 seed=GTCCATGGGG Num.seqs=3  
Similarity=0.802469  
0 GTCCATGGGGCTGGGGCC

\*\*\*\*\*

Consensus:

GTCCATGGGGCTGGGGCC

>Bacillus\_Fam\_1921\_18\_1 Nr. of seq. 1 Alignment length(with gaps) = 18  
Alignment score = 0.000000  
GCF\_002019595.1\_ASM201959v1\_genomic.fna\_1:4176749-4176929 Satlength=181  
Nr of Repeats=8 RepeatLength=18 seed=CCTTGCATCA Num.seqs=7  
Similarity=0.978836 0  
CCTTGCATCATCGGCTGG

\*\*\*\*\*

Consensus:

CCTTGCATCATCGGCTGG

>Bacillus\_Fam\_1922\_18\_1 Nr. of seq. 1 Alignment length(with gaps) = 18  
Alignment score = 0.000000  
GCF\_900093775.1\_EVONIK\_BGLY\_genomic.fna\_1:1113432-1113558 Satlength=127  
Nr of Repeats=5 RepeatLength=18 seed=CAGCTCCAGC Num.seqs=3  
Similarity=0.950617 0  
CAGCTCCAGCAGCTTGAA

\*\*\*\*\*

Consensus:

CAGCTCCAGCAGCTTGAA

>Bacillus\_Fam\_1923\_18\_1 Nr. of seq. 1 Alignment length(with gaps) = 18  
Alignment score = 0.000000  
GCF\_900093775.1\_EVONIK\_BGLY\_genomic.fna\_1:1232676-1232982 Satlength=307  
Nr of Repeats=16 RepeatLength=18 seed=GAGAAAAGCA Num.seqs=15  
Similarity=0.950617 0  
GAGAAAAGCAAGGAGCAC

\*\*\*\*\*

Consensus:

GAGAAAAGCAAGGAGCAC

>Bacillus\_Fam\_1924\_18\_1 Nr. of seq. 1 Alignment length(with gaps) = 18  
Alignment score = 0.000000  
GCF\_900109925.1\_IMG-  
taxon\_2651870116\_annotated\_assembly\_genomic.fna\_16:169169-169439  
Satlength=271 Nr of Repeats=9 RepeatLength=18 seed=CCTGGTTGCG Num.seqs=7  
Similarity=0.802840 0 CCTGGTTGCGGNGCAAAG

\*\*\*\*\*

Consensus:

CCTGGTTGCGGNGCAAAG

>Bacillus\_Fam\_1925\_17\_1 Nr. of seq. 1 Alignment length(with gaps) = 17  
Alignment score = 0.000000  
GCF\_000331575.1\_ASM33157v1\_genomic.fna\_3:53390-53458 Satlength=69 Nr of  
Repeats=4 RepeatLength=17 seed=ATGATGCAAAA Num.seqs=4 Similarity=0.960784  
0 ATGATGCAAAAAAGACG

\*\*\*\*\*

Consensus:

ATGATGCAAAAAAGACG

>Bacillus\_Fam\_1926\_15\_1 Nr. of seq. 1 Alignment length(with gaps) = 15  
Alignment score = 0.000000  
GCF\_000161455.1\_ASM16145v1\_genomic.fna\_1:5573108-5573288 Satlength=181 Nr  
of Repeats=12 RepeatLength=15 seed=GTAACAATGA Num.seqs=12  
Similarity=0.894949 0  
GTAACAATGAACCAA

\*\*\*\*\*

Consensus:

GTAACAATGAACCAA

>Bacillus\_Fam\_1927\_15\_1 Nr. of seq. 1 Alignment length(with gaps) = 15  
Alignment score = 0.000000  
GCF\_000242895.2\_ASM24289v3\_genomic.fna\_1:2772134-2772299 Satlength=166 Nr of  
Repeats=10 RepeatLength=15 seed=GCAGCAGTTC Num.seqs=9  
Similarity=0.829630 0  
GCAGCAGTTCNCGGC

\*\*\*\*\*

Consensus:

GCAGCAGTTCNCGGC

>Bacillus\_Fam\_1928\_15\_1 Nr. of seq. 1 Alignment length(with gaps) = 15  
Alignment score = 0.000000  
GCF\_000292245.2\_ASM29224v2\_genomic.fna\_7:15608-15698 Satlength=91 Nr of  
Repeats=6 RepeatLength=15 seed=GGATCTTCTT Num.seqs=6 Similarity=0.638562  
0 GGATCTTCTTTNACC

\*\*\*\*\*

Consensus:

GGATCTTCTTTNACC

>Bacillus\_Fam\_1929\_15\_1 Nr. of seq. 1 Alignment length(with gaps) = 15  
Alignment score = 0.000000  
GCF\_000307875.1\_BABA1.0\_genomic.fna\_55:97122-97182 Satlength=61 Nr of  
Repeats=4 RepeatLength=15 seed=AATAATGGCA Num.seqs=4 Similarity=0.896296  
0 AATAATGGCAACGGC

\*\*\*\*\*

Consensus:

AATAATGGCAACGGC

>Bacillus\_Fam\_1930\_15\_1 Nr. of seq. 1 Alignment length(with gaps) = 15  
Alignment score = 0.000000  
GCF\_000331575.1\_ASM33157v1\_genomic.fna\_1:1522649-1522889 Satlength=241 Nr  
of Repeats=16 RepeatLength=15 seed=TATTCGCTCC Num.seqs=16  
Similarity=0.870370 0  
TATTCGCTCCAGTGC

\*\*\*\*\*

Consensus:

TATTCGCTCCAGTGC

>Bacillus\_Fam\_1931\_15\_1 Nr. of seq. 1 Alignment length(with gaps) = 15  
Alignment score = 0.000000

GCF\_000331575.1\_ASM33157v1\_genomic.fna\_2:602668-602743 Satlength=76 Nr of Repeats=4 RepeatLength=15 seed=ATCACGAATT Num.seqs=3 Similarity=1.000000  
13 CACGAATTCTATAAT

\*\*\*\*\*

Consensus:

ATCACGAATTCTATA

>Bacillus\_Fam\_1932\_15\_1 Nr. of seq. 1 Alignment length(with gaps) = 15  
Alignment score = 0.000000

GCF\_000331575.1\_ASM33157v1\_genomic.fna\_4:168656-168731 Satlength=76 Nr of Repeats=5 RepeatLength=15 seed=ATTTCTCCGC Num.seqs=5 Similarity=0.813333  
0 ATTTCTCCGCTTGGC

\*\*\*\*\*

Consensus:

ATTTCTCCGCTTGGC

>Bacillus\_Fam\_1933\_15\_1 Nr. of seq. 1 Alignment length(with gaps) = 15  
Alignment score = 0.000000

GCF\_000331575.1\_ASM33157v1\_genomic.fna\_6:23405-23463 Satlength=59 Nr of Repeats=4 RepeatLength=15 seed=ATTGTAAAAA Num.seqs=3 Similarity=1.000000  
0 ATTGTAAAAATAAAT

\*\*\*\*\*

Consensus:

ATTGTAAAAATAAAT

>Bacillus\_Fam\_1934\_15\_1 Nr. of seq. 1 Alignment length(with gaps) = 15  
Alignment score = 0.000000

GCF\_000374345.1\_ASM37434v1\_genomic.fna\_6:64384-64486 Satlength=103 Nr of Repeats=4 RepeatLength=15 seed=TTCAAGTTCA Num.seqs=3 Similarity=1.000000  
0 TTCAAGTTCAAGCAA

\*\*\*\*\*

Consensus:

TTCAAGTTCAAGCAA

>Bacillus\_Fam\_1935\_15\_1 Nr. of seq. 1 Alignment length(with gaps) = 15  
Alignment score = 0.000000

GCF\_000474275.1\_Bmar1.0\_genomic.fna\_8:95892-95952 Satlength=61 Nr of Repeats=4 RepeatLength=15 seed=AGATTGAGTA Num.seqs=4 Similarity=1.000000  
0 AGATTGAGTAAACAG

\*\*\*\*\*

Consensus:

AGATTGAGTAAACAG

>Bacillus\_Fam\_1936\_15\_1 Nr. of seq. 1 Alignment length(with gaps) = 15  
Alignment score = 0.000000  
GCF\_000612625.1\_JCE\_genomic.fna\_2:32740-32845 Satlength=106 Nr of  
Repeats=7 RepeatLength=15 seed=GCTGGTGCCT Num.seqs=7 Similarity=0.898413  
0 GCTGGTGCCTTCGCT

\*\*\*\*\*  
Consensus:

GCTGGTGCCTTCGCT

>Bacillus\_Fam\_1937\_15\_1 Nr. of seq. 1 Alignment length(with gaps) = 15  
Alignment score = 0.000000  
GCF\_000759675.1\_ASM75967v1\_genomic.fna\_19:633-873 Satlength=241 Nr of  
Repeats=16 RepeatLength=15 seed=TTAATTGGTG Num.seqs=16  
Similarity=0.873333  
0 TTAATTGGTGCTNCT

\*\*\*\*\*  
Consensus:

TTAATTGGTGCTNCT

>Bacillus\_Fam\_1938\_15\_1 Nr. of seq. 1 Alignment length(with gaps) = 15  
Alignment score = 0.000000  
GCF\_000759675.1\_ASM75967v1\_genomic.fna\_19:225767-226489 Satlength=723 Nr  
of Repeats=13 RepeatLength=15 seed=TGAACTTCTT Num.seqs=10  
Similarity=0.952593  
TGAACTTCTTATTTT 0

\*\*\*\*\*  
Consensus:

TGAACTTCTTATTTT

>Bacillus\_Fam\_1939\_15\_1 Nr. of seq. 1 Alignment length(with gaps) = 15  
Alignment score = 0.000000  
GCF\_000787375.1\_ASM78737v1\_genomic.fna\_1:295361-295436 Satlength=76 Nr of  
Repeats=4 RepeatLength=15 seed=TTCATCGGTT Num.seqs=3 Similarity=0.881481  
5 GCTGGTTCATCGGTT

\*\*\*\*\*  
Consensus:

TTCATCGGTTGCTGG

>Bacillus\_Fam\_1940\_15\_1 Nr. of seq. 1 Alignment length(with gaps) = 15  
Alignment score = 0.000000  
GCF\_000812025.2\_ASM81202v2\_genomic.fna\_59:10143-10233 Satlength=91 Nr of  
Repeats=5 RepeatLength=15 seed=ATGCATGAGA Num.seqs=4 Similarity=0.911111  
0 ATGCATGAGAACACC

\*\*\*\*\*  
Consensus:

ATGCATGAGAACACC

>Bacillus\_Fam\_1941\_15\_1 Nr. of seq. 1 Alignment length(with gaps) = 15  
Alignment score = 0.000000  
GCF\_001420715.1\_ASM142071v1\_genomic.fna\_24:95921-96146 Satlength=226 Nr  
of Repeats=14 RepeatLength=15 seed=AGACGTTCTA Num.seqs=13  
Similarity=0.831339  
AGACGTTCTAGTAGA

0

\*\*\*\*\*  
Consensus:

AGACGTTCTAGTAGA

>Bacillus\_Fam\_1942\_15\_1 Nr. of seq. 1 Alignment length(with gaps) = 15  
Alignment score = 0.000000  
GCF\_001590785.1\_ASM159078v1\_genomic.fna\_7:40479-40902 Satlength=424 Nr of  
Repeats=8 RepeatLength=15 seed=TCTCCGTGCT Num.seqs=6 Similarity=0.875556  
0 TCTCCGTGCTCATGG

\*\*\*\*\*  
Consensus:

TCTCCGTGCTCATGG

>Bacillus\_Fam\_1943\_15\_1 Nr. of seq. 1 Alignment length(with gaps) = 15  
Alignment score = 0.000000  
GCF\_001591665.1\_ASM159166v1\_genomic.fna\_29:1963-2053 Satlength=91 Nr of  
Repeats=4 RepeatLength=15 seed=GAAGTGTTCC Num.seqs=3 Similarity=1.000000  
0 GAAGTGTTCCGTCTC

\*\*\*\*\*  
Consensus:

GAAGTGTTCCGTCTC

>Bacillus\_Fam\_1944\_15\_1 Nr. of seq. 1 Alignment length(with gaps) = 15  
Alignment score = 0.000000  
GCF\_001591805.1\_ASM159180v1\_genomic.fna\_17:30976-31126 Satlength=151 Nr  
of Repeats=10 RepeatLength=15 seed=CAACCGATCC Num.seqs=10  
Similarity=0.899259  
CAACCGATCCAGGAC

0

\*\*\*\*\*  
Consensus:

CAACCGATCCAGGAC

>Bacillus\_Fam\_1945\_15\_1 Nr. of seq. 1 Alignment length(with gaps) = 15  
Alignment score = 0.000000  
GCF\_001636325.1\_ASM163632v1\_genomic.fna\_1:2446901-2447021 Satlength=121  
Nr of Repeats=7 RepeatLength=15 seed=AATCCTGGAC Num.seqs=6



```
Similarity=0.946667 0
AATCCTGGACCTCCA

*****
Consensus:

AATCCTGGACCTCCA

>Bacillus_Fam_1946_15_1 Nr. of seq. 1 Alignment length(with gaps) = 15
Alignment score = 0.000000
GCF_002019595.1_ASM201959v1_genomic.fna_1:1565861-1565951 Satlength=91 Nr
of Repeats=6 RepeatLength=15 seed=CCGGGGAAAC Num.seqs=6
Similarity=0.946667 0
CCGGGGAAACCGCCA

*****
Consensus:

CCGGGGAAACCGCCA

>Bacillus_Fam_1947_15_1 Nr. of seq. 1 Alignment length(with gaps) = 15
Alignment score = 0.000000
GCF_002019635.1_ASM201963v1_genomic.fna_1:1407148-1407343 Satlength=196
Nr of Repeats=12 RepeatLength=15 seed=CACTGATGAT Num.seqs=11
Similarity=0.938586 0
CACTGATGATCCGGG

*****
Consensus:

CACTGATGATCCGGG

>Bacillus_Fam_1948_15_1 Nr. of seq. 1 Alignment length(with gaps) = 15
Alignment score = 0.000000
GCF_900156875.1_PRJEB18969_genomic.fna_11:2364715-2365012 Satlength=298
Nr of Repeats=8 RepeatLength=15 seed=TGCATCAT TG Num.seqs=7
Similarity=0.718254 0
TGCATCAT TGGTGAT

*****
Consensus:

TGCATCAT TGGTGAT

>Bacillus_Fam_1949_14_1 Nr. of seq. 1 Alignment length(with gaps) = 14
Alignment score = 0.000000
GCF_000331575.1_ASM33157v1_genomic.fna_1:1707310-1707394 Satlength=85 Nr
of Repeats=6 RepeatLength=14 seed=ATTTTG TAGT Num.seqs=6
Similarity=0.917460
0 ATTTTG TAGTCGTG

*****
Consensus:
```

ATTTTGTAGTCGTG

>Bacillus\_Fam\_1950\_13\_1 Nr. of seq. 1 Alignment length(with gaps) = 13  
Alignment score = 0.000000  
GCF\_000331575.1\_ASM33157v1\_genomic.fna\_3:37579-37631 Satlength=53 Nr of  
Repeats=4 RepeatLength=13 seed=TACTAGGAGA Num.seqs=4 Similarity=0.948718  
0 TACTAGGAGACAG

\*\*\*\*\*

Consensus:

TACTAGGAGACAG

>Bacillus\_Fam\_1951\_13\_1 Nr. of seq. 1 Alignment length(with gaps) = 13  
Alignment score = 0.000000  
GCF\_000430765.1\_ASM43076v1\_genomic.fna\_6:130918-130983 Satlength=66 Nr of  
Repeats=5 RepeatLength=13 seed=AGTGTTTCAGG Num.seqs=5 Similarity=1.000000  
0 AGTGTTTCAGGATA

\*\*\*\*\*

Consensus:

AGTGTTTCAGGATA

>Bacillus\_Fam\_1952\_12\_1 Nr. of seq. 1 Alignment length(with gaps) = 12  
Alignment score = 0.000000  
GCF\_000161455.1\_ASM16145v1\_genomic.fna\_1:175339-175456 Satlength=118 Nr  
of Repeats=5 RepeatLength=12 seed=CGTGATGGTA Num.seqs=3  
Similarity=0.851852  
0 CGTGATGGTAAT

\*\*\*\*\*

Consensus:

CGTGATGGTAAT

>Bacillus\_Fam\_1953\_12\_1 Nr. of seq. 1 Alignment length(with gaps) = 12  
Alignment score = 0.000000  
GCF\_000242895.2\_ASM24289v3\_genomic.fna\_1:2189079-2189571 Satlength=493 Nr  
of Repeats=39 RepeatLength=12 seed=CGTTCAAGCC Num.seqs=37  
Similarity=0.830831 0  
CGTTCAAGCCGT

\*\*\*\*\*

Consensus:

CGTTCAAGCCGT

>Bacillus\_Fam\_1954\_12\_1 Nr. of seq. 1 Alignment length(with gaps) = 12  
Alignment score = 0.000000  
GCF\_000307875.1\_BABA1.0\_genomic.fna\_97:105197-105245 Satlength=49 Nr of  
Repeats=4 RepeatLength=12 seed=CAAATATGAT Num.seqs=4 Similarity=1.000000  
0 CAAATATGATGC

\*\*\*\*\*

Consensus:

CAAATATGATGC

>Bacillus\_Fam\_1955\_12\_1 Nr. of seq. 1 Alignment length(with gaps) = 12  
Alignment score = 0.000000  
GCF\_000331575.1\_ASM33157v1\_genomic.fna\_1:1702114-1702162 Satlength=49 Nr  
of Repeats=4 RepeatLength=12 seed=CGTTGTATTA Num.seqs=4  
Similarity=1.000000  
0 CGTTGTATTATT

\*\*\*\*\*

Consensus:

CGTTGTATTATT

>Bacillus\_Fam\_1956\_12\_1 Nr. of seq. 1 Alignment length(with gaps) = 12  
Alignment score = 0.000000  
GCF\_000331575.1\_ASM33157v1\_genomic.fna\_4:145562-145634 Satlength=73 Nr of  
Repeats=6 RepeatLength=12 seed=ATGCAAACCTC Num.seqs=6 Similarity=0.731624  
0 ATGCAAACCTCTA

\*\*\*\*\*

Consensus:

ATGCAAACCTCTA

>Bacillus\_Fam\_1957\_12\_1 Nr. of seq. 1 Alignment length(with gaps) = 12  
Alignment score = 0.000000  
GCF\_000380245.2\_ASM38024v2\_genomic.fna\_12:2893696-2893756 Satlength=61 Nr  
of Repeats=5 RepeatLength=12 seed=CTTTTTTACA Num.seqs=5  
Similarity=1.000000 0  
CTTTTTTACAAC

\*\*\*\*\*

Consensus:

CTTTTTTACAAC

>Bacillus\_Fam\_1958\_12\_1 Nr. of seq. 1 Alignment length(with gaps) = 12  
Alignment score = 0.000000  
GCF\_000429725.1\_ASM42972v1\_genomic.fna\_2:378953-379145 Satlength=193 Nr  
of Repeats=12 RepeatLength=12 seed=ACGACATGGA Num.seqs=8  
Similarity=0.773810  
0 ACGACATGGACA

\*\*\*\*\*

Consensus:

ACGACATGGACA

>Bacillus\_Fam\_1959\_12\_1 Nr. of seq. 1 Alignment length(with gaps) = 12  
Alignment score = 0.000000  
GCF\_000430765.1\_ASM43076v1\_genomic.fna\_4:178616-178796 Satlength=181 Nr  
of Repeats=9 RepeatLength=12 seed=TGGTTCCATT Num.seqs=7  
Similarity=0.883598  
0 TGGTTCCATTGC

\*\*\*\*\*

Consensus:

TGGTTCCATTGC

>Bacillus\_Fam\_1960\_12\_1 Nr. of seq. 1 Alignment length(with gaps) = 12  
Alignment score = 0.000000  
GCF\_000751775.1\_A1A\_genomic.fna\_68:68366-68414 Satlength=49 Nr of  
Repeats=4 RepeatLength=12 seed=TCTTTGATTC Num.seqs=4 Similarity=0.944444  
0 TCTTTGATTCCT

\*\*\*\*\*

Consensus:

TCTTTGATTCCT

>Bacillus\_Fam\_1961\_12\_1 Nr. of seq. 1 Alignment length(with gaps) = 12  
Alignment score = 0.000000  
GCF\_000752035.1\_Bacillus\_rubiinfantis\_genomic.fna\_13:49986-50062  
Satlength=77 Nr of Repeats=5 RepeatLength=12 seed=ATTGGTGCCT Num.seqs=3  
Similarity=1.000000 0  
ATTGGTGCCTTT

\*\*\*\*\*

Consensus:

ATTGGTGCCTTT

>Bacillus\_Fam\_1962\_12\_1 Nr. of seq. 1 Alignment length(with gaps) = 12  
Alignment score = 0.000000  
GCF\_001636345.1\_ASM163634v1\_genomic.fna\_1:3481278-3481350 Satlength=73 Nr  
of Repeats=6 RepeatLength=12 seed=GGGCGTTCTT Num.seqs=6  
Similarity=1.000000 0  
GGGCGTTCTTCG

\*\*\*\*\*

Consensus:

GGGCGTTCTTCG

>Bacillus\_Fam\_1963\_11\_1 Nr. of seq. 1 Alignment length(with gaps) = 11  
Alignment score = 0.000000  
GCF\_000331575.1\_ASM33157v1\_genomic.fna\_1:1378343-1378409 Satlength=67 Nr  
of Repeats=6 RepeatLength=11 seed=GCACTATTTT Num.seqs=6  
Similarity=0.935354  
0 GCACTATTTTC

\*\*\*\*\*

Consensus:

GCACTATTTTC

>Bacillus\_Fam\_1964\_11\_1 Nr. of seq. 1 Alignment length(with gaps) = 11  
Alignment score = 0.000000  
GCF\_000831065.1\_ASM83106v1\_genomic.fna\_1:2961625-2961669 Satlength=45 Nr  
of Repeats=4 RepeatLength=11 seed=AGGGGCTTAG Num.seqs=4  
Similarity=1.000000  
0 AGGGGCTTAGA

\*\*\*\*\*

Consensus:

AGGGGCTTAGA

>Bacillus\_Fam\_1965\_11\_1 Nr. of seq. 1 Alignment length(with gaps) = 11  
Alignment score = 0.000000  
GCF\_001636345.1\_ASM163634v1\_genomic.fna\_1:595400-595488 Satlength=89 Nr  
of Repeats=8 RepeatLength=11 seed=CCAAAAACCG Num.seqs=8  
Similarity=1.000000  
0 CCAAAAACCGC

\*\*\*\*\*

Consensus:

CCAAAAACCGC

>Bacillus\_Fam\_1966\_10\_1 Nr. of seq. 1 Alignment length(with gaps) = 10  
Alignment score = 0.000000  
GCF\_000331575.1\_ASM33157v1\_genomic.fna\_2:525802-525852 Satlength=51 Nr of  
Repeats=4 RepeatLength=10 seed=TTGTCGCGGA Num.seqs=3 Similarity=1.000000  
0 TTGTCGCGGA

\*\*\*\*\*

Consensus:

TTGTCGCGGA
