# Supplementary material for: Tandem Repeats in Bacillus: Unique Features and Taxonomic Distribution
Source: MDPI journal article supplement (doi:10.3390/ijms22105373), 2021-05-20
Supplement: s1 [file s1]

**Table S7. Blastn of TGTCCTTTT in *B. coagulans* (NC-015634)**

We have determined the exact matches of the TGTCCTTTT signal on the genome of *B. coagulans* (NC-015634). Blastn has been used. Hits on tandem repeats have been eliminated from the list. We find the sequence to be present in about 50 genes of different types. The first three hits, for example, correspond to tRNA synthetase, FadR transcription regulator and cytochrome oxidase

| Start   | End     |         | Reverse |
|---------|---------|---------|---------|
|         |         | Start   | End     |
| 56984   | 56976   |         |         |
| 519694  | 519686  |         |         |
| 559411  | 559403  |         |         |
| 649485  | 649477  |         |         |
| 656518  | 656510  | 48298   | 48306   |
| 698568  | 698560  | 51918   | 51926   |
| 709956  | 709948  | 109813  | 109821  |
| 744478  | 744470  | 167466  | 167474  |
| 847693  | 847685  | 331471  | 331479  |
| 852480  | 852472  | 380074  | 380082  |
| 971570  | 971562  | 424918  | 424926  |
| 980361  | 980353  | 439756  | 439764  |
| 1017354 | 1017346 | 769753  | 769761  |
| 1041636 | 1041628 | 1049399 | 1049407 |
| 1480845 | 1480837 | 1068682 | 1068690 |
| 1643601 | 1643593 | 1108089 | 1108097 |
| 1828597 | 1828589 | 1108505 | 1108513 |
| 1872121 | 1872113 | 1147117 | 1147125 |
| 1969558 | 1969550 | 1280019 | 1280027 |
| 2115600 | 2115592 | 1408525 | 1408533 |
| 2253684 | 2253676 | 1643858 | 1643866 |
| 2521570 | 2521562 | 1711096 | 1711104 |
| 2640895 | 2640887 | 1911361 | 1911369 |
| 2718035 | 2718027 | 2038675 | 2038683 |
| 2718087 | 2718079 | 2154002 | 2154010 |
| 2793789 | 2793781 | 2288686 | 2288694 |
| 2871401 | 2871393 | 2407275 | 2407283 |
| 3061604 | 3061596 | 2417011 | 2417019 |
|         |         | 2437651 | 2437659 |
|         |         | 2565198 | 2565206 |
|         |         | 2583949 | 2583957 |
|         |         | 2875492 | 2875500 |
|         |         | 2886659 | 2886667 |
