# Supplementary material for: Tandem Repeats in Bacillus: Unique Features and Taxonomic Distribution
Source: MDPI journal article supplement (doi:10.3390/ijms22105373), 2021-05-20
Supplement: s1 [file s1]

**Figure S1.** Histograms showing the number of 52 nt repeats in individual tandem repeats (satellites) of selected species. The 21 class includes all tandem repeats with more than 20 repeats.

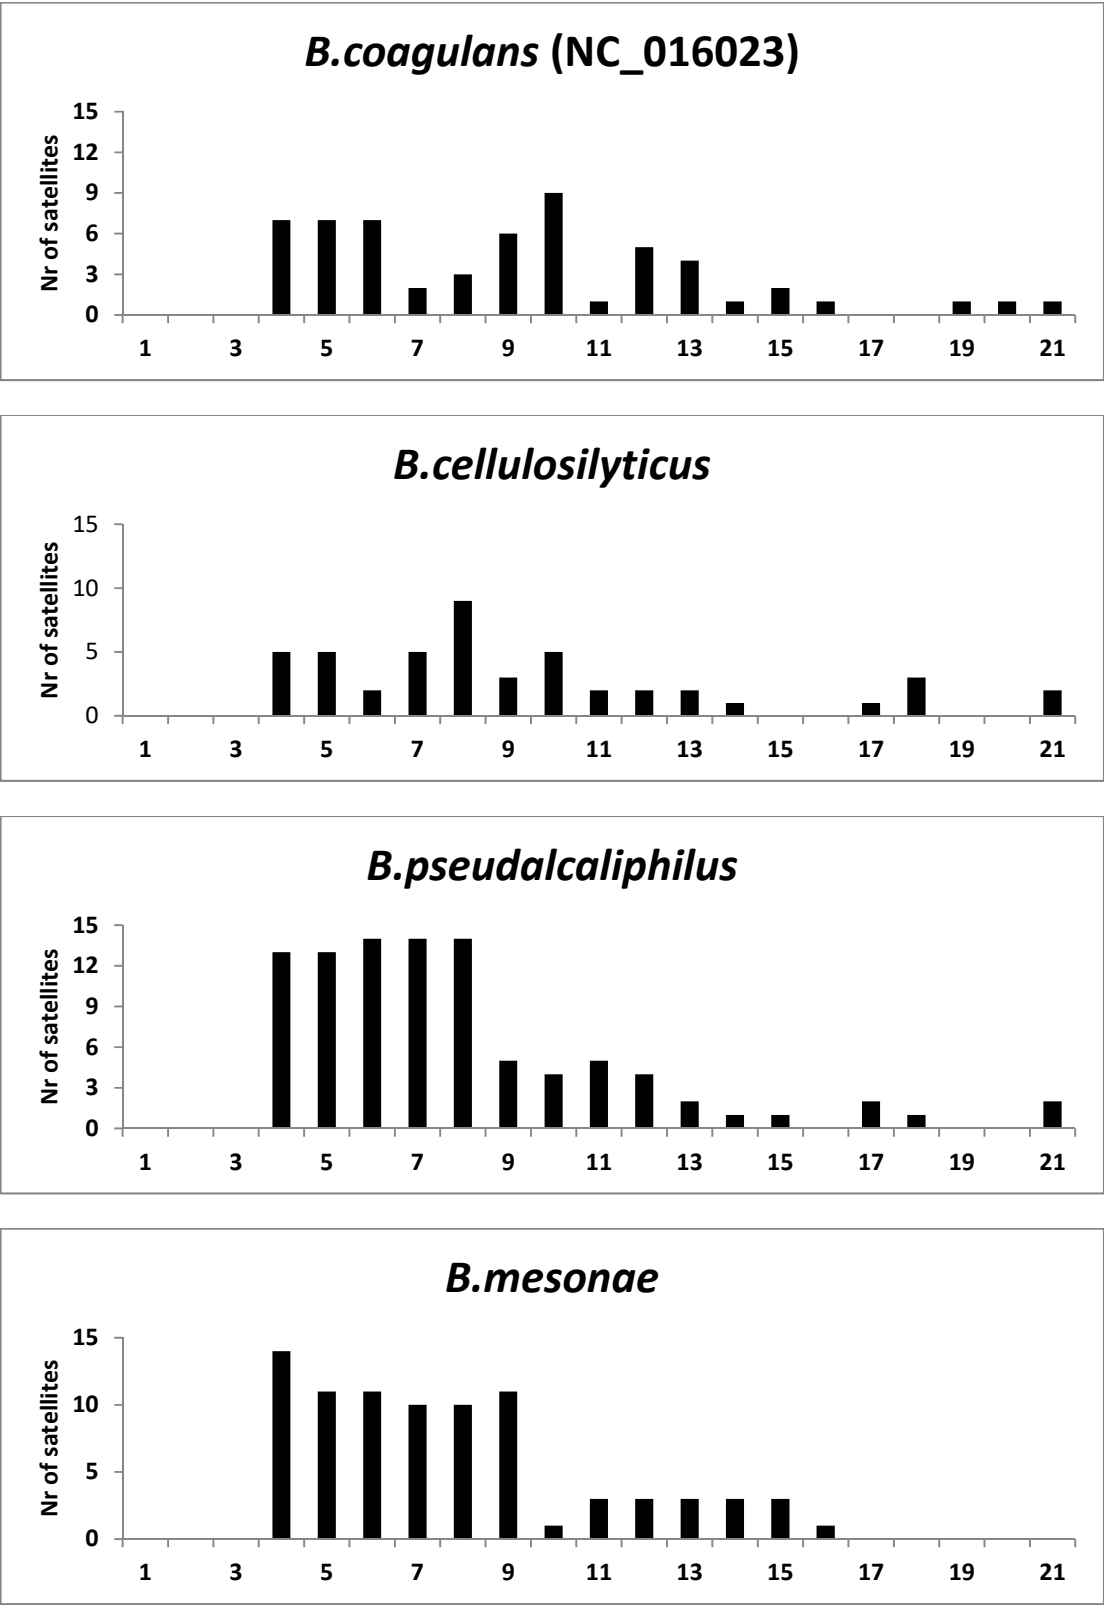

Number of repeats in each tandem
