# Supplementary material for: Tandem Repeats in Bacillus: Unique Features and Taxonomic Distribution
Source: MDPI journal article supplement (doi:10.3390/ijms22105373), 2021-05-20
Supplement: s1 [file s1]

The program is running under the following parameters:

Output:

Prefix of the family name Bacillus

Circular permutations are allowed

Reverse sequences are considered.

Sequences are aligned while similarity: 0.600000

Alignment score: Normalized respect to the length and number of sequences.

Alignment parameters:

opening gap: -3.000000

extensio gap: -1.000000

extreme gaph: -0.500000

\*\*\*\*\*

There are 1966 alignments:

>Bacillus\_Fam\_1\_60\_41 Nr. of seq. 41 Alignment length(with gaps) = 64  
Alignment score = 0.721735

TCCGCCTTTTngCCgATtTctTGaTAGAATTCTTTgTCATGgTtTnnGcaGTnGCTTC

>Bacillus\_Fam\_2\_52\_36 Nr. of seq. 36 Alignment length(with gaps) = 57  
Alignment score = 0.678177

CTTAACgTAGACGngCTCTATGTgAAGgAAGgcCnTCntTTTnCnnGCTTc

>Bacillus\_Fam\_3\_50\_31 Nr. of seq. 31 Alignment length(with gaps) = 64  
Alignment score = 0.605623

gAATCnCGGGGTTGCGaGCnGAAAAAGaGGAGAAAAGCCCGAGCAAACGcn

>Bacillus\_Fam\_4\_52\_27 Nr. of seq. 27 Alignment length(with gaps) = 53  
Alignment score = 0.745847

AAgGGAATCAaACAAcGtTTTCaTTCCTTTgttggGCTTTtGGCATgAGA

>Bacillus\_Fam\_5\_52\_25 Nr. of seq. 25 Alignment length(with gaps) = 56  
Alignment score = 0.706369

GTTAATGTGaAGATACgGAGGCcAAACcttGgAGTAtCTGCACAAAGAGggG

>Bacillus\_Fam\_6\_20\_21 Nr. of seq. 21 Alignment length(with gaps) = 22  
Alignment score = 0.672366

TGCTAATAAAanngAAAAGt

>Bacillus\_Fam\_7\_52\_18 Nr. of seq. 18 Alignment length(with gaps) = 60  
Alignment score = 0.620516

ATCGTACCCtCgnAAACcGaaAAaCGATnTgggAGGGTAAGCAAAnGcnnGA

>Bacillus\_Fam\_8\_52\_17 Nr. of seq. 17 Alignment length(with gaps) = 56  
Alignment score = 0.680278

gacGACGAGAAAnnGGTcTCGTGCGCAAAAAAngGaGTTTtnCGnGtCAAAAn

>Bacillus\_Fam\_9\_52\_16 Nr. of seq. 16 Alignment length(with gaps) = 60  
Alignment score = 0.601759

CCTtTGATTCCCTTTncGGCTtTtATTcaatgGCTTTtGgcaTCATTGcnGn

>Bacillus\_Fam\_10\_20\_16 Nr. of seq. 16 Alignment length(with gaps) = 22  
Alignment score = 0.662626

tCGCCAATAAAAAttanATTT

>Bacillus\_Fam\_11\_51\_15 Nr. of seq. 15 Alignment length(with gaps) = 56  
Alignment score = 0.625454

TTTTCATtACcTATtcCnntTTaTTCGCACCcTAATtcnncaCAgCnCgGc

>Bacillus\_Fam\_12\_52\_15 Nr. of seq. 15 Alignment length(with gaps) = 54  
Alignment score = 0.703939

TTTTGgCGACGAGaCccntTCTCGTCACCATTTTgaggtGAgAAAtGctCaa

```

>Bacillus_Fam_13_21_15 Nr. of seq. 15 Alignment length(with gaps) = 24
Alignment score = 0.642196
TTACCGTaGATAAAATnGcngt
>Bacillus_Fam_14_21_15 Nr. of seq. 15 Alignment length(with gaps) = 23
Alignment score = 0.651484
AATCGCGGATAGAgcnccnAn
>Bacillus_Fam_15_52_14 Nr. of seq. 14 Alignment length(with gaps) = 54
Alignment score = 0.680301
ATGAACGACCgcGggCgcGGnTTTTCTtCCGgcgCGGGCTTTCATTCCCtT
>Bacillus_Fam_16_52_14 Nr. of seq. 14 Alignment length(with gaps) = 54
Alignment score = 0.664021
ATGAGAACCGAAAgAGgtccAGcGnaAgcaGgaAaCGGTCTTCATaAagGgg
>Bacillus_Fam_17_12_14 Nr. of seq. 14 Alignment length(with gaps) = 14
Alignment score = 0.607535
CTTTtTCTtTtT
>Bacillus_Fam_18_52_13 Nr. of seq. 13 Alignment length(with gaps) = 57
Alignment score = 0.612086
GTTTCATGAGTAAGTAAAnAGcAAAAAnanGnAAAntagTtACTCATAaagg
>Bacillus_Fam_19_53_13 Nr. of seq. 13 Alignment length(with gaps) = 57
Alignment score = 0.601589
TGctGCCACTTTTtacCnGaGatGgATcCtcaTTTGTGGCGTCATTcGcngtAG
>Bacillus_Fam_20_52_13 Nr. of seq. 13 Alignment length(with gaps) = 53
Alignment score = 0.740364
ATGAAGACnTcAGTGACgAggAAaaAGGAGgAGAGAAgTCCTCATcGccGTt
>Bacillus_Fam_21_36_13 Nr. of seq. 13 Alignment length(with gaps) = 36
Alignment score = 0.755935
TgTTATCCATnATtGGCATnATgTTtGGcatTTGaT
>Bacillus_Fam_22_53_12 Nr. of seq. 12 Alignment length(with gaps) = 56
Alignment score = 0.655032
GTTCCCTCTaTTTcTCnTTTTTCgnntTTTgAGGGCACGATtACGCncTGATC
>Bacillus_Fam_23_52_12 Nr. of seq. 12 Alignment length(with gaps) = 55
Alignment score = 0.736639
TTTTGTCCTTTTGACaGctTCAAAAgGACATTTTCGngCCCGGATGCagCncG
>Bacillus_Fam_24_21_12 Nr. of seq. 12 Alignment length(with gaps) = 23
Alignment score = 0.627141
CGCcCATTGAACncnnAAATT
>Bacillus_Fam_25_20_12 Nr. of seq. 12 Alignment length(with gaps) = 21
Alignment score = 0.723545
tTTTTTATAGCGAAAATtTan
>Bacillus_Fam_26_53_11 Nr. of seq. 11 Alignment length(with gaps) = 58
Alignment score = 0.666458
nGtTGGTCGACATGATCATgGnAAAAAAGGncaAGAACcTGTCGATGAaGGn
>Bacillus_Fam_27_39_11 Nr. of seq. 11 Alignment length(with gaps) = 40
Alignment score = 0.799394
CTACATTTTCTTTcTTcACTTGcGGcGAtACTATaTTtC
>Bacillus_Fam_28_21_11 Nr. of seq. 11 Alignment length(with gaps) = 25
Alignment score = 0.604364
TTTACTCGCCAATTcGnGngn
>Bacillus_Fam_29_20_11 Nr. of seq. 11 Alignment length(with gaps) = 22
Alignment score = 0.720386
TTTATTGGCGATtTTcaaAT
>Bacillus_Fam_30_18_11 Nr. of seq. 11 Alignment length(with gaps) = 19
Alignment score = 0.651675
CCTGTTACTCCnGTTGga

```

```

>Bacillus_Fam_31_51_10 Nr. of seq. 10 Alignment length(with gaps) = 56
Alignment score = 0.632407
gtTGTC CAATAGaAGcggTCTAaTGGACAAGAAatctgGtnaaAagcGAAAA
>Bacillus_Fam_32_52_10 Nr. of seq. 10 Alignment length(with gaps) = 56
Alignment score = 0.659061
TTTcGTTACCCggCaCaCncatTTTcCTCCTTCTcGGTAACCAAtCgCTctC
>Bacillus_Fam_33_52_10 Nr. of seq. 10 Alignment length(with gaps) = 55
Alignment score = 0.634747
gTGTaTCATACgaaggCAATGACACgtGAgAAAGtaGaaGaaacgnAATAAA
>Bacillus_Fam_34_52_10 Nr. of seq. 10 Alignment length(with gaps) = 54
Alignment score = 0.660905
TGTCCGAAGtngCgCcAAcTTCGGA CTcatTCTcCtCngaTTTctgCTtCTcC
>Bacillus_Fam_35_52_10 Nr. of seq. 10 Alignment length(with gaps) = 53
Alignment score = 0.701887
TTGATGGTtCCgAaCtCagaGATAAGTGCCAtCAAAacgGAAAatCCnCcGn
>Bacillus_Fam_36_20_10 Nr. of seq. 10 Alignment length(with gaps) = 26
Alignment score = 0.611966
GTTTTGGCTAtTTTTCaAgg
>Bacillus_Fam_37_21_10 Nr. of seq. 10 Alignment length(with gaps) = 24
Alignment score = 0.601389
TTTGATAGGAAAnncaaaAAn
>Bacillus_Fam_38_15_10 Nr. of seq. 10 Alignment length(with gaps) = 15
Alignment score = 0.786667
CCaGAaCCgTTgCCa
>Bacillus_Fam_39_81_9 Nr. of seq. 9 Alignment length(with gaps) = 83
Alignment score = 0.715640

AgCAAAATTCAGtCCgGAAACgATtTTaacagAgCTGGATAAgTTcACaACnTCaTTcATGaGnAAAGTgGAcG
aaATcGCn
>Bacillus_Fam_40_52_9 Nr. of seq. 9 Alignment length(with gaps) = 58
Alignment score = 0.648467
tCTTTTGTC TTTTTGAnncCTCCAAAAGGACAaTTtGcnCCTgggtCCgGcTc
>Bacillus_Fam_41_51_9 Nr. of seq. 9 Alignment length(with gaps) = 57
Alignment score = 0.622157
TTTTTCATTACcTATcCncnnTTTTTCGCACcnTAATTTggcCtgCtcggC
>Bacillus_Fam_42_53_9 Nr. of seq. 9 Alignment length(with gaps) = 56
Alignment score = 0.615245
CanaCCAACAtCcCTencAtAATcCatTCTCaTTGGnctGaTTActCCcTTTT
>Bacillus_Fam_43_53_9 Nr. of seq. 9 Alignment length(with gaps) = 56
Alignment score = 0.632275
nGCttGCATAAGGGTATCtTTCcgCnTGAAaGaTgCCCTTATngaGGaGgAAn
>Bacillus_Fam_44_51_9 Nr. of seq. 9 Alignment length(with gaps) = 54
Alignment score = 0.728567
GTTTTGCTGATAGTAAAtCCTTTTTATCGTCAGCAAATcgAGNaTcaCgnC
>Bacillus_Fam_45_52_9 Nr. of seq. 9 Alignment length(with gaps) = 53
Alignment score = 0.615129
gATGAAGGACAtTTcGccgttngcangCCnntgtTTTGTCTTCATCacCCc
>Bacillus_Fam_46_36_9 Nr. of seq. 9 Alignment length(with gaps) = 36
Alignment score = 0.777263
taCACCAGTggCACCgGTAGgtCCaGTATctCCAGT
>Bacillus_Fam_47_21_9 Nr. of seq. 9 Alignment length(with gaps) = 24
Alignment score = 0.626157
tCACGAGTAAAnnGCTcAAAc

```

>Bacillus\_Fam\_48\_21\_9 Nr. of seq. 9 Alignment length(with gaps) = 23  
Alignment score = 0.644525  
ATTCGCTAATAAACnnncaAg  
>Bacillus\_Fam\_49\_21\_9 Nr. of seq. 9 Alignment length(with gaps) = 22  
Alignment score = 0.671296  
tTACTCGTGAAATtngtGCat  
>Bacillus\_Fam\_50\_18\_9 Nr. of seq. 9 Alignment length(with gaps) = 21  
Alignment score = 0.615520  
cAnAAGAAAgNAGAAGAA  
>Bacillus\_Fam\_51\_21\_9 Nr. of seq. 9 Alignment length(with gaps) = 21  
Alignment score = 0.772046  
ACTCGTGAgTTTcgcnCnTTT  
>Bacillus\_Fam\_52\_18\_9 Nr. of seq. 9 Alignment length(with gaps) = 18  
Alignment score = 0.911008  
GAGCTTTAGCTGCTTctT  
>Bacillus\_Fam\_53\_18\_9 Nr. of seq. 9 Alignment length(with gaps) = 18  
Alignment score = 0.913580  
CCTTGGTTGTcGTTTCCg  
>Bacillus\_Fam\_54\_114\_8 Nr. of seq. 8 Alignment length(with gaps) = 115  
Alignment score = 0.790890

TCGCTTACATtGCATTGGCCATaCTtATTnnaACCCACAGCcacCACcGTaCCGTCCgATTTAAGnCCgATgG  
TATGannacAaCCCGCCGcNacCGCCACAATAtCGcGCCAG

>Bacillus\_Fam\_55\_52\_8 Nr. of seq. 8 Alignment length(with gaps) = 59  
Alignment score = 0.632062

TCATGAGGACAAAgTCGgacGAAAacCaaGaAAggttTGTCCTCATAgAGGGt

>Bacillus\_Fam\_56\_52\_8 Nr. of seq. 8 Alignment length(with gaps) = 58  
Alignment score = 0.632389

nagTTTTGTCTTCATCaccCTTATGAAGGACACTTctCtCtcTTTtCaCtC

>Bacillus\_Fam\_57\_52\_8 Nr. of seq. 8 Alignment length(with gaps) = 57  
Alignment score = 0.671261

GGACAAAATgaaGngtCAAtCAGgAAAAAcTGTCCAATAGAACGGcTCTCaT

>Bacillus\_Fam\_58\_52\_8 Nr. of seq. 8 Alignment length(with gaps) = 57  
Alignment score = 0.619779

TTTCTTGACAgCTTTgCGCTcttcaccctgAAAcCTGTcACAATAACggCTT

>Bacillus\_Fam\_59\_55\_8 Nr. of seq. 8 Alignment length(with gaps) = 57  
Alignment score = 0.625731

CGCCACAAAcnAggAtcCnaTCacngGnAAAAGTGGCagCACTACnGcgGAATGA

>Bacillus\_Fam\_60\_52\_8 Nr. of seq. 8 Alignment length(with gaps) = 56  
Alignment score = 0.673044

ATGGCACTTATCcGGgAGAAtAGAACCATCAAAAAAGaagaATnctCaGGTTG

>Bacillus\_Fam\_61\_52\_8 Nr. of seq. 8 Alignment length(with gaps) = 56  
Alignment score = 0.638924

gnAtCTTGGTTCGtCAAAGcGAGnGAATGaAGCCCAAGATnngaAtcnaAAAg

>Bacillus\_Fam\_62\_52\_8 Nr. of seq. 8 Alignment length(with gaps) = 55  
Alignment score = 0.629437

GGTctTAGTcAagccgACTAanACCcTCTgAnccggAaAAAAggAAaCAGAg

>Bacillus\_Fam\_63\_52\_8 Nr. of seq. 8 Alignment length(with gaps) = 54  
Alignment score = 0.661155

gATGAAGGACTTTTctcTGGaTcTctTnCncctTTTTGTCTTCAGnACCCg

>Bacillus\_Fam\_64\_45\_8 Nr. of seq. 8 Alignment length(with gaps) = 45  
Alignment score = 0.881481

TTTTTGcTCTTCTTGTTGTTTACGAGCTTGTTCaTCAGCtTGaCG

>Bacillus\_Fam\_65\_26\_8 Nr. of seq. 8 Alignment length(with gaps) = 26  
Alignment score = 0.630495  
ATcTGAGCCAGGcTCAAaagngtgn

>Bacillus\_Fam\_66\_21\_8 Nr. of seq. 8 Alignment length(with gaps) = 24  
Alignment score = 0.630208  
TTCGCAAATAAAACnGgnaAa

>Bacillus\_Fam\_67\_21\_8 Nr. of seq. 8 Alignment length(with gaps) = 21  
Alignment score = 0.806689  
TGaAGaAACAGAAAaaCCAGG

>Bacillus\_Fam\_68\_52\_7 Nr. of seq. 7 Alignment length(with gaps) = 54  
Alignment score = 0.639624  
CGGTCACTtATAGCctTcATtaGTgACCACTTTtTCnATTtnaaCnagATTt

>Bacillus\_Fam\_69\_52\_7 Nr. of seq. 7 Alignment length(with gaps) = 54  
Alignment score = 0.627572  
tGACagCTTTTCgnCTTtCCnnCcAAACCTGTCCGAAgTTGgnnCTncTTC

>Bacillus\_Fam\_70\_52\_7 Nr. of seq. 7 Alignment length(with gaps) = 54  
Alignment score = 0.638448  
aAaatGGaAAATgGTGTcGcGaAAAgngAGAAACACCCctcTaaAaTCCAG

>Bacillus\_Fam\_71\_52\_7 Nr. of seq. 7 Alignment length(with gaps) = 54  
Alignment score = 0.641387  
TGTCTGAAGTaGCCTnGnGTTTCGGACAGcTTTgaTtgtTTnnaaGcnAAAGC

>Bacillus\_Fam\_72\_52\_7 Nr. of seq. 7 Alignment length(with gaps) = 52  
Alignment score = 0.731380  
CATAGgCctTCTATGATtcAGTTGCcgaaGCgAAAACAAGGAGnAAGTgAAT

>Bacillus\_Fam\_73\_20\_7 Nr. of seq. 7 Alignment length(with gaps) = 22  
Alignment score = 0.655123  
TTTTATAGCGAntTTTnCnT

>Bacillus\_Fam\_74\_21\_7 Nr. of seq. 7 Alignment length(with gaps) = 22  
Alignment score = 0.698413  
TTTATTTATCAcCGAnCnCnn

>Bacillus\_Fam\_75\_22\_7 Nr. of seq. 7 Alignment length(with gaps) = 22  
Alignment score = 0.622655  
TTTACTCGCCaAtTTngnnAcn

>Bacillus\_Fam\_76\_21\_7 Nr. of seq. 7 Alignment length(with gaps) = 21  
Alignment score = 0.702948  
TTACTTAACAnnTtttcAAAa

>Bacillus\_Fam\_77\_15\_7 Nr. of seq. 7 Alignment length(with gaps) = 16  
Alignment score = 0.610119  
cCtGGtTCTTCnGTn

>Bacillus\_Fam\_78\_12\_7 Nr. of seq. 7 Alignment length(with gaps) = 12  
Alignment score = 0.830688  
CGGCGAGtAGAA

>Bacillus\_Fam\_79\_12\_7 Nr. of seq. 7 Alignment length(with gaps) = 12  
Alignment score = 0.640212  
nTgTTGAtnTTG

>Bacillus\_Fam\_80\_52\_6 Nr. of seq. 6 Alignment length(with gaps) = 58  
Alignment score = 0.624904  
CGGTCACTCATAaGGTagATGAGAGCCCGngAAtaGcaAAAAGAAGnaAGaG

>Bacillus\_Fam\_81\_52\_6 Nr. of seq. 6 Alignment length(with gaps) = 57  
Alignment score = 0.684016  
GGAGAAAaccGaAGcaAAAGTGTCTTCATAAAGGnGATGAAGGACAAAcaA

>Bacillus\_Fam\_82\_52\_6 Nr. of seq. 6 Alignment length(with gaps) = 57  
Alignment score = 0.644444  
aaAAGGGcAGTCATGTATnCcGGGAgcgtTncGGgaTACATGAGTGGgTcGa

>Bacillus\_Fam\_83\_52\_6 Nr. of seq. 6 Alignment length(with gaps) = 56  
Alignment score = 0.775397  
AACCaCTTTTCGCGaAATCCnCATCATTTTcGGCTCATAGaACTCTTCTATG

>Bacillus\_Fam\_84\_53\_6 Nr. of seq. 6 Alignment length(with gaps) = 56  
Alignment score = 0.659127  
cTTTGCTTACCCTcCccAncCgtTTTTTCGcTcTTGCTGGGTAcGATTCCTCC

>Bacillus\_Fam\_85\_52\_6 Nr. of seq. 6 Alignment length(with gaps) = 55  
Alignment score = 0.734949  
CAcTCAACGAAGGTcATCATAAGcAAGCAATGCTaCCCCAAAACCAAACcn

>Bacillus\_Fam\_86\_53\_6 Nr. of seq. 6 Alignment length(with gaps) = 55  
Alignment score = 0.654545  
CTGatTTTTcTGTTCGTTCCGGGtTCTATaCacCTTATTGAaGACTCTTTCgn

>Bacillus\_Fam\_87\_52\_6 Nr. of seq. 6 Alignment length(with gaps) = 53  
Alignment score = 0.628512  
TCTACGTGACCcaacgtCctctTTTTcnTCcgnTtCGGTcCaCGTAGAACctC

>Bacillus\_Fam\_88\_52\_6 Nr. of seq. 6 Alignment length(with gaps) = 53  
Alignment score = 0.782809  
GTCAATCGTTACCGTTTCACAGaAGaTCAaCtCATTAcGGGCACGATTcAGt

>Bacillus\_Fam\_89\_53\_6 Nr. of seq. 6 Alignment length(with gaps) = 53  
Alignment score = 0.780503  
aGnCAAaAATGTGTGTCCAAGGcGaaAGTGGAGACAcAtaAcGAaGgAAAAAc

>Bacillus\_Fam\_90\_42\_6 Nr. of seq. 6 Alignment length(with gaps) = 42  
Alignment score = 0.812169  
TCTTCCACTTGTGGTTcTACTACcACTTGCTGCACtGGtTtT

>Bacillus\_Fam\_91\_20\_6 Nr. of seq. 6 Alignment length(with gaps) = 22  
Alignment score = 0.625758  
aATTTAATTGCGATTcTcGg

>Bacillus\_Fam\_92\_21\_6 Nr. of seq. 6 Alignment length(with gaps) = 22  
Alignment score = 0.633333  
AAActngaAAntTGGCGGAATA

>Bacillus\_Fam\_93\_21\_6 Nr. of seq. 6 Alignment length(with gaps) = 22  
Alignment score = 0.603030  
ATCGCGGAaAGaagtGcCGGA

>Bacillus\_Fam\_94\_21\_6 Nr. of seq. 6 Alignment length(with gaps) = 21  
Alignment score = 0.647619  
ATTcCGCCAAACtnaggATTa

>Bacillus\_Fam\_95\_20\_6 Nr. of seq. 6 Alignment length(with gaps) = 20  
Alignment score = 0.731111  
ATACTCTTCACtTTcgaGAA

>Bacillus\_Fam\_96\_15\_6 Nr. of seq. 6 Alignment length(with gaps) = 15  
Alignment score = 0.751111  
TAAaAAGAAAAaaC

>Bacillus\_Fam\_97\_12\_6 Nr. of seq. 6 Alignment length(with gaps) = 12  
Alignment score = 0.807407  
GGTTCTGGcTTT

>Bacillus\_Fam\_98\_52\_5 Nr. of seq. 5 Alignment length(with gaps) = 61  
Alignment score = 0.610929  
tttctnctctGnTTcCtatTtTcggcttCatgaagngctcatgGcgaccatT

>Bacillus\_Fam\_99\_61\_5 Nr. of seq. 5 Alignment length(with gaps) = 61  
Alignment score = 0.663934  
CCtgTtgCATtGcaCCgtttcCgTTnAAGTAgTACCATgttCCanttAntTGctTgCCAA

>Bacillus\_Fam\_100\_52\_5 Nr. of seq. 5 Alignment length(with gaps) = 59  
Alignment score = 0.628531  
AGAGtGtgCTtGTGACCAAAaGtAAgnTngGAatcCATagAAGTGGTCACA

>Bacillus\_Fam\_101\_51\_5 Nr. of seq. 5 Alignment length(with gaps) = 58  
Alignment score = 0.637356  
GGAATtgTGACAGgTttGnaGTGaaAGccgAAAAGCTGTCAAGAAAAccac

>Bacillus\_Fam\_102\_52\_5 Nr. of seq. 5 Alignment length(with gaps) = 58  
Alignment score = 0.601149  
nGcTATTGgCGACAtTtCTnttagcAAAAntcAacaaAAGTGTTTCCAATgg

>Bacillus\_Fam\_103\_53\_5 Nr. of seq. 5 Alignment length(with gaps) = 57  
Alignment score = 0.626901  
CACTCgGnGTAgTGGcGCCAcAAAngAGGatcCaTcaCgaGaAAAAGTGGcAg

>Bacillus\_Fam\_104\_52\_5 Nr. of seq. 5 Alignment length(with gaps) = 56  
Alignment score = 0.618750  
ATGACGGACAcTTTTntCntntTTccntngaTTTcTGTCCGTCATggCCTtg

>Bacillus\_Fam\_105\_53\_5 Nr. of seq. 5 Alignment length(with gaps) = 56  
Alignment score = 0.664286  
AgTCATGTAtccCAacagGCATCcGgGATACATgACccGGCnGagaAAAGnGA

>Bacillus\_Fam\_106\_53\_5 Nr. of seq. 5 Alignment length(with gaps) = 56  
Alignment score = 0.671429  
tTGGaTaAAatTAGGaGAAaGCGaACCaGtAAAgtcGTnaaTCaTCctcGCAa

>Bacillus\_Fam\_107\_52\_5 Nr. of seq. 5 Alignment length(with gaps) = 55  
Alignment score = 0.752727  
gAGTaAGTAACGAAAAGaGccGAACgaGnCAGTTACTcGaGGGaAGtgAGn

>Bacillus\_Fam\_108\_52\_5 Nr. of seq. 5 Alignment length(with gaps) = 55  
Alignment score = 0.681818  
TaATGTGCAGATAcgGAaGAGanaAGgGctaGTAtCTGcACAAAgAGgcGgt

>Bacillus\_Fam\_109\_52\_5 Nr. of seq. 5 Alignment length(with gaps) = 55  
Alignment score = 0.613333  
ancCtGTCAgTtnCcTTTTTTCnnGccTcnCngatTTTTtGGGcACTGAGAg

>Bacillus\_Fam\_110\_52\_5 Nr. of seq. 5 Alignment length(with gaps) = 54  
Alignment score = 0.714815  
TGGTAGTTAATCgaGAnGaaTAACGACGAAAAagacgaaggTCnAaGGAAAAa

>Bacillus\_Fam\_111\_52\_5 Nr. of seq. 5 Alignment length(with gaps) = 54  
Alignment score = 0.714815  
TTTGcTACCCcATATtTcNcNcCaCtCcgtTTTATAaGGatGCATTTTcttcT

>Bacillus\_Fam\_112\_52\_5 Nr. of seq. 5 Alignment length(with gaps) = 54  
Alignment score = 0.676543  
ACTTATCtCGnntTtCAGtACCACCAAnaCgcagatntCCTTtctTGATGGC

>Bacillus\_Fam\_113\_52\_5 Nr. of seq. 5 Alignment length(with gaps) = 54  
Alignment score = 0.609877  
GACAgTTTTnntaatTTTTtgaagcgggtTTTGTCTtCaAGAagcCTTATTgAA

>Bacillus\_Fam\_114\_52\_5 Nr. of seq. 5 Alignment length(with gaps) = 54  
Alignment score = 0.701235  
gATGAgAACCGaAACaAncgcagcAaGAGAAGGaAaCGGTCTTCATcAaGgg

>Bacillus\_Fam\_115\_53\_5 Nr. of seq. 5 Alignment length(with gaps) = 53  
Alignment score = 0.694969  
GGTCAAAAGGagaAGCnCTATTACCCGAAAAgngaGccGnacCaaGaAnaAc

>Bacillus\_Fam\_116\_51\_5 Nr. of seq. 5 Alignment length(with gaps) = 53  
Alignment score = 0.735220  
aAtcncggggttgCnggnGnaAAaaGcaGGagtaaccccgAGcAAAcGgnG

>Bacillus\_Fam\_117\_52\_5 Nr. of seq. 5 Alignment length(with gaps) = 53  
Alignment score = 0.725786  
AGTAACTGaCAtgtTcaGcCttTTTCGTGtaGTTACTCACcctnttCCTtcg

>Bacillus\_Fam\_118\_52\_5 Nr. of seq. 5 Alignment length(with gaps) = 53  
Alignment score = 0.699371  
aGTTcCCGagccCgCGnaAaaTccTCCATCaaGGTAACCAAAcGCaCTCatt

```

>Bacillus_Fam_119_52_5 Nr. of seq. 5 Alignment length(with gaps) = 53
Alignment score = 0.620755
GtTTTGTCTAaTAgAGnncttCTATtGgACAAaAtCaTtgCtCagAnCatGt
>Bacillus_Fam_120_52_5 Nr. of seq. 5 Alignment length(with gaps) = 52
Alignment score = 0.853846
ACACATTTTTcgCtTnTcCCcaTGATAATCTGTCTCagGcATGGCtTCTGAC
>Bacillus_Fam_121_52_5 Nr. of seq. 5 Alignment length(with gaps) = 52
Alignment score = 0.823077
tnaTTGAACCCCGAaCagGCGAAAAAAgCatCAAAGaGTCTTCAATAGggG
>Bacillus_Fam_122_45_5 Nr. of seq. 5 Alignment length(with gaps) = 48
Alignment score = 0.736806
ACTGGACCTCAAGGtgTCAAGGAcCagcaGGtgCTACTGGtGCT
>Bacillus_Fam_123_39_5 Nr. of seq. 5 Alignment length(with gaps) = 42
Alignment score = 0.642857
tTCTnCTcTttGcTgCTCtTCTTGCTTaCGtTTtTcttc
>Bacillus_Fam_124_40_5 Nr. of seq. 5 Alignment length(with gaps) = 42
Alignment score = 0.684127
ATTTGCGTCTcCtCngnGATTTtTGCGTCGgTtTtCtCan
>Bacillus_Fam_125_42_5 Nr. of seq. 5 Alignment length(with gaps) = 42
Alignment score = 0.888889
AAAGAAGAAGTaAAAGAgCCggtAAAAGAAGTTGAAGaAaCa
>Bacillus_Fam_126_39_5 Nr. of seq. 5 Alignment length(with gaps) = 39
Alignment score = 0.788034
nAAgCAaCAAAgTtCTAAaCAAGAnGATTCnTCTCAagA
>Bacillus_Fam_127_36_5 Nr. of seq. 5 Alignment length(with gaps) = 36
Alignment score = 0.792593
gTTGtTCTTCTaCGACcGGtgCtTCTTCTgCAACTg
>Bacillus_Fam_128_36_5 Nr. of seq. 5 Alignment length(with gaps) = 36
Alignment score = 0.874074
CTTCcACTTCTTCTgaCTCTTctGtTTCcGCAATTA
>Bacillus_Fam_129_29_5 Nr. of seq. 5 Alignment length(with gaps) = 30
Alignment score = 0.824444
GAGCAGCGgAGCGTACAagggACGTACGt
>Bacillus_Fam_130_21_5 Nr. of seq. 5 Alignment length(with gaps) = 24
Alignment score = 0.626389
TCGACCAcATttngaAnTAAT
>Bacillus_Fam_131_24_5 Nr. of seq. 5 Alignment length(with gaps) = 24
Alignment score = 0.822222
AGCTTctTCTTCaGCTTtTTTctT
>Bacillus_Fam_132_21_5 Nr. of seq. 5 Alignment length(with gaps) = 23
Alignment score = 0.630435
AGTcGAGCATAaAncCtgAaa
>Bacillus_Fam_133_21_5 Nr. of seq. 5 Alignment length(with gaps) = 23
Alignment score = 0.650725
TGCAAATAAAAannngTgaAAC
>Bacillus_Fam_134_21_5 Nr. of seq. 5 Alignment length(with gaps) = 23
Alignment score = 0.628986
TTTATCAGCGaAttTnannct
>Bacillus_Fam_135_21_5 Nr. of seq. 5 Alignment length(with gaps) = 23
Alignment score = 0.630435
TTTATTTTCgaaTTTgaTcan
>Bacillus_Fam_136_20_5 Nr. of seq. 5 Alignment length(with gaps) = 22
Alignment score = 0.613636
GATATatTTnganAATCGCt

```



```

>Bacillus_Fam_137_20_5 Nr. of seq. 5 Alignment length(with gaps) = 22
Alignment score = 0.633333
CcGATATAaTcagAtTtTcg
>Bacillus_Fam_138_20_5 Nr. of seq. 5 Alignment length(with gaps) = 22
Alignment score = 0.601515
taTCaGCCAAACTTnnnatT
>Bacillus_Fam_139_21_5 Nr. of seq. 5 Alignment length(with gaps) = 22
Alignment score = 0.645455
nTcGnGATaTATGAGCgAGan
>Bacillus_Fam_140_22_5 Nr. of seq. 5 Alignment length(with gaps) = 22
Alignment score = 0.630303
TTTATTGTCCnGaTncgcnnCA
>Bacillus_Fam_141_20_5 Nr. of seq. 5 Alignment length(with gaps) = 21
Alignment score = 0.666667
ATCGGTCTaAcTtnaaAtAT
>Bacillus_Fam_142_20_5 Nr. of seq. 5 Alignment length(with gaps) = 20
Alignment score = 0.746667
tctCgCTATacgAGAGTATt
>Bacillus_Fam_143_20_5 Nr. of seq. 5 Alignment length(with gaps) = 20
Alignment score = 0.686667
cGCAAATAAAanctngGaAT
>Bacillus_Fam_144_18_5 Nr. of seq. 5 Alignment length(with gaps) = 18
Alignment score = 0.718518
GGagcAACnGGcCCaCa
>Bacillus_Fam_145_12_5 Nr. of seq. 5 Alignment length(with gaps) = 12
Alignment score = 0.811111
GAAGAnGAaGAt
>Bacillus_Fam_146_52_4 Nr. of seq. 4 Alignment length(with gaps) = 58
Alignment score = 0.652778
gTTCGGAActgCtCtgaacGGgTTTCTCTCTGTCCGAAGttGCAtCaG
>Bacillus_Fam_147_54_4 Nr. of seq. 4 Alignment length(with gaps) = 57
Alignment score = 0.632554
TTCATccgcTtGATGAACACCAcTTTTtCCTcnGnCTTCntCTggaATTgTGGTg
>Bacillus_Fam_148_52_4 Nr. of seq. 4 Alignment length(with gaps) = 57
Alignment score = 0.626218
gCTcTTGgTGACCGAaAtccaaGGAaAaAaGTGGTaACCAAGaAGg
>Bacillus_Fam_149_53_4 Nr. of seq. 4 Alignment length(with gaps) = 57
Alignment score = 0.627680
GACAGCTTtaGCTanAtcAAcAgAGaAAGCTGTCCGAACatAGccAgACTTCG
>Bacillus_Fam_150_53_4 Nr. of seq. 4 Alignment length(with gaps) = 56
Alignment score = 0.619048
GATTAACtaCCATTTTcgCCTTactcCAcCTcAaTTTcGgCGTtAaTCCatct
>Bacillus_Fam_151_52_4 Nr. of seq. 4 Alignment length(with gaps) = 56
Alignment score = 0.669643
TTATGAAGGACAtTTCagccTGCgGtTcgcaacCtTTTGTCTTCATCCcGc
>Bacillus_Fam_152_53_4 Nr. of seq. 4 Alignment length(with gaps) = 56
Alignment score = 0.633929
tGAaGGTCATCATAcGaAGGnCAATGCTacCCGAgAAAgcAaaAcagAaGcgc
>Bacillus_Fam_153_52_4 Nr. of seq. 4 Alignment length(with gaps) = 56
Alignment score = 0.611607
cTcTTCaTTTcagttTTCGGTCACTCCAGacCcCcTgGAgTgACCCaAtCnT
>Bacillus_Fam_154_53_4 Nr. of seq. 4 Alignment length(with gaps) = 56
Alignment score = 0.640377
TCTACGTTACCCttcagCcTtatTTTTcgACCTtTCGGgCACGTAGAcACCCt

```

>Bacillus\_Fam\_155\_54\_4 Nr. of seq. 4 Alignment length(with gaps) = 56  
Alignment score = 0.630952  
CCTGAAaCaCtcTccgATcaCTCTnCTTCAGagGAATAAAtgCatCtTTATtCA

>Bacillus\_Fam\_156\_51\_4 Nr. of seq. 4 Alignment length(with gaps) = 55  
Alignment score = 0.623232  
ATTgGTAATGnAaaTtTcactTTCTtCTtTTTaCGGTGCGTATTAtcctga

>Bacillus\_Fam\_157\_53\_4 Nr. of seq. 4 Alignment length(with gaps) = 55  
Alignment score = 0.639899  
ctttaATTCGCaCCCTaATTTGnCTgCnAtcCtCgATTtTCATTACctATCACg

>Bacillus\_Fam\_158\_51\_4 Nr. of seq. 4 Alignment length(with gaps) = 55  
Alignment score = 0.638384  
AGTCCGAACcTGccaCaACTTCgGACAgAaAacGAAAAAtCCcgtGccAG

>Bacillus\_Fam\_159\_52\_4 Nr. of seq. 4 Alignment length(with gaps) = 55  
Alignment score = 0.621212  
GTTTCGGACaCgATTTcGCTtcTnCGacctTtttCTGTCCGAACtAcCaCCaA

>Bacillus\_Fam\_160\_52\_4 Nr. of seq. 4 Alignment length(with gaps) = 55  
Alignment score = 0.711616  
aTAAGTGCCAtCAaCaACagAGATTcCtggTTTGgTGGTTCcTtTcTgCCTG

>Bacillus\_Fam\_161\_52\_4 Nr. of seq. 4 Alignment length(with gaps) = 55  
Alignment score = 0.627778  
ctcAaGTTTaCGcgAAAacgGGcgCATAgAACCTTcCTATgAaCCcAaaATc

>Bacillus\_Fam\_162\_53\_4 Nr. of seq. 4 Alignment length(with gaps) = 55  
Alignment score = 0.636364  
ggAgAGaATcGTgCCCGAAATcnaaGgaAGGcgAAGgaAAACGGtAACAATag

>Bacillus\_Fam\_163\_52\_4 Nr. of seq. 4 Alignment length(with gaps) = 55  
Alignment score = 0.742929  
cAAAAATGGTCTTCATCacccTTATGAAGaaCATTTCTCTTcGgCTttTCatC

>Bacillus\_Fam\_164\_52\_4 Nr. of seq. 4 Alignment length(with gaps) = 55  
Alignment score = 0.659596  
GCGTTcCATtCACcttCTATGACACgCGttttCaCTccCGCTCtCtattTTc

>Bacillus\_Fam\_165\_52\_4 Nr. of seq. 4 Alignment length(with gaps) = 55  
Alignment score = 0.602525  
gTTCAGACAGCTTTTgcccgcctaGCaCcgaAAgCTGTCCGAAGtTgGCCaAG

>Bacillus\_Fam\_166\_52\_4 Nr. of seq. 4 Alignment length(with gaps) = 54  
Alignment score = 0.626543  
tTTTCATTACcTATCaCaaCTTtTTTCGcACccTAATcCcagCATCcCacaan

>Bacillus\_Fam\_167\_52\_4 Nr. of seq. 4 Alignment length(with gaps) = 54  
Alignment score = 0.618827  
aAAAAATGGTCATAGagagagaAACTGGAACCAAAAatgctcGaGcaAAgcga

>Bacillus\_Fam\_168\_50\_4 Nr. of seq. 4 Alignment length(with gaps) = 54  
Alignment score = 0.652778  
TTTGTCTTTTCATAAgCTcGATGAAaGACTTTTTCTtgaagcTCCAcCgAT

>Bacillus\_Fam\_169\_54\_4 Nr. of seq. 4 Alignment length(with gaps) = 54  
Alignment score = 0.745885  
GaCGAAAAcGTGgnaGaGAgGtAGaGAAAatGGTAGcTAATCaACcGGATTAAc

>Bacillus\_Fam\_170\_52\_4 Nr. of seq. 4 Alignment length(with gaps) = 54  
Alignment score = 0.600823  
GGACaaCTTTctCcgCctgcCgCcTcAACCTGTCCGAACttacaccgaCTTC

>Bacillus\_Fam\_171\_53\_4 Nr. of seq. 4 Alignment length(with gaps) = 54  
Alignment score = 0.641975  
GTCGCaTAgaAAGGcGTATAcGCGaCcGAgCGGcaGaaAAAataGaGnngCtCG

>Bacillus\_Fam\_172\_53\_4 Nr. of seq. 4 Alignment length(with gaps) = 54  
Alignment score = 0.720165  
aTGAAGGACTTTgCtCGcTcTTCTtgACctgGTTTTGgcCTTCATtagCttga

>Bacillus\_Fam\_173\_52\_4 Nr. of seq. 4 Alignment length(with gaps) = 54  
Alignment score = 0.661523  
ATCGTGCCCTcaAAAcgagaAAAACGAAAtagaGGtAACGATgaAGcGctG

>Bacillus\_Fam\_174\_54\_4 Nr. of seq. 4 Alignment length(with gaps) = 54  
Alignment score = 0.763375  
GTCATGTATcCCAaCAGGTTcCCGGaATACATGaGTAtGacaGaAAaAAGGaTa

>Bacillus\_Fam\_175\_54\_4 Nr. of seq. 4 Alignment length(with gaps) = 54  
Alignment score = 0.627572  
CATGagACATACTTtCtCTaaaAAccccCTcaacTtaTGTttCATGAaCCctT

>Bacillus\_Fam\_176\_53\_4 Nr. of seq. 4 Alignment length(with gaps) = 54  
Alignment score = 0.659465  
gAaaAAATTAGGaAAaagCgAACCaGcAAAcgcatAtaCAGGTtCGCAtaTG

>Bacillus\_Fam\_177\_51\_4 Nr. of seq. 4 Alignment length(with gaps) = 53  
Alignment score = 0.768344  
AAAAAtGGGAAccAAAGAGCCgcAaTgATGCCCAAAATcCaaGAGtCGCgG

>Bacillus\_Fam\_178\_52\_4 Nr. of seq. 4 Alignment length(with gaps) = 53  
Alignment score = 0.633124  
ATAAGAAAGcgCcGgATTccCaTCAAGAAaaccGcaAnCncGaaTaAAGtTG

>Bacillus\_Fam\_179\_53\_4 Nr. of seq. 4 Alignment length(with gaps) = 53  
Alignment score = 0.742138  
CTTAGTCaGCTGaACTAGaaCCCTCTGaTaaGacAATTaagAGtCCAGAGGGc

>Bacillus\_Fam\_180\_53\_4 Nr. of seq. 4 Alignment length(with gaps) = 53  
Alignment score = 0.778826  
ACCGCTATTTCTaTGAAAAcGAAAATAaTGGTTcCAGCaggAGaGAGcTAGa

>Bacillus\_Fam\_181\_53\_4 Nr. of seq. 4 Alignment length(with gaps) = 53  
Alignment score = 0.796646  
TTcCTcgTcCtCTCTTcCaTTTTCGTCgTCATGAaCCCTCcATGaCGACCATt

>Bacillus\_Fam\_182\_53\_4 Nr. of seq. 4 Alignment length(with gaps) = 53  
Alignment score = 0.667715  
GTCAGtGCCCaAAATccGCgGagGcCnGccaAAAAAGGTAACTGAcAggCcgc

>Bacillus\_Fam\_183\_52\_4 Nr. of seq. 4 Alignment length(with gaps) = 53  
Alignment score = 0.642034  
GGgTGATGAAGGcCaaAACgtGgaaAaaGagaagcaGAAAAGTCcTTCATaa

>Bacillus\_Fam\_184\_52\_4 Nr. of seq. 4 Alignment length(with gaps) = 53  
Alignment score = 0.692872  
TCCAATaagCCgATTGGAtACCTTTTcTCCnAttTTTccagcgGaACGGGt

>Bacillus\_Fam\_185\_52\_4 Nr. of seq. 4 Alignment length(with gaps) = 53  
Alignment score = 0.707547  
TTTTGgcCTTCATCngcCTTATGAAGacCATTTtGaaCCtGGctCaCgcCTg

>Bacillus\_Fam\_186\_51\_4 Nr. of seq. 4 Alignment length(with gaps) = 52  
Alignment score = 0.607906  
GCaCCgTAATttcggcaccCacctgTTTCATTACctATTCatcgtTATtC

>Bacillus\_Fam\_187\_51\_4 Nr. of seq. 4 Alignment length(with gaps) = 52  
Alignment score = 0.695513  
TTTCATTACcTATCccagGTTTTTCGcACCcTAATccctGCaAAacTcaAt

>Bacillus\_Fam\_188\_52\_4 Nr. of seq. 4 Alignment length(with gaps) = 52  
Alignment score = 0.668803  
TGAAGGACAAAACcCtgtAgaAAaacagaAgAAaTGTCTTCATaaaGccaA

>Bacillus\_Fam\_189\_52\_4 Nr. of seq. 4 Alignment length(with gaps) = 52  
Alignment score = 0.784188  
GGcccTAGTCGagCGaACTAAcACCCTCTATtCtcCAAAATGacaTTCAGAG

>Bacillus\_Fam\_190\_52\_4 Nr. of seq. 4 Alignment length(with gaps) = 52  
Alignment score = 0.841880  
AAAAATGTGTCTCAacCcgGTCaATGGAAaCACATAAcAAGaGATtaTGCTcA

>Bacillus\_Fam\_191\_52\_4 Nr. of seq. 4 Alignment length(with gaps) = 52  
Alignment score = 0.735043  
ttTTGGTTCCAGTTAcaCaatCTAtGACCATTTTctGcttgaCtaCACCcaA

>Bacillus\_Fam\_192\_45\_4 Nr. of seq. 4 Alignment length(with gaps) = 45  
Alignment score = 0.887654  
CAAAATCCATATGcAGCAcCaCaAAacCAAGAACAACAATATCAa

>Bacillus\_Fam\_193\_42\_4 Nr. of seq. 4 Alignment length(with gaps) = 43  
Alignment score = 0.714470  
TGGCCGaAAAAGcgacgCAGTTGGCGcgAAAGtgaGtTcaGT

>Bacillus\_Fam\_194\_40\_4 Nr. of seq. 4 Alignment length(with gaps) = 40  
Alignment score = 0.730556  
AAAaGAGCCAacGGaaCcGTCCCCcGGCCCaGcTcCAaa

>Bacillus\_Fam\_195\_40\_4 Nr. of seq. 4 Alignment length(with gaps) = 40  
Alignment score = 0.661111  
nTAAAGCggTaataGcgCTGgGGGaCAGgCCCCGcTnaaG

>Bacillus\_Fam\_196\_40\_4 Nr. of seq. 4 Alignment length(with gaps) = 40  
Alignment score = 0.686111  
cAGACGCAAAATcagaaTTtcGACGCAAAATCctcaGaag

>Bacillus\_Fam\_197\_36\_4 Nr. of seq. 4 Alignment length(with gaps) = 36  
Alignment score = 0.608025  
CCAGTcGgtCCAGTaaTaCCaGTntctCCaGTagca

>Bacillus\_Fam\_198\_36\_4 Nr. of seq. 4 Alignment length(with gaps) = 36  
Alignment score = 0.804012  
TCTTCCTTAGccTTtgCTActTCTTGgaCTTTcgCT

>Bacillus\_Fam\_199\_36\_4 Nr. of seq. 4 Alignment length(with gaps) = 36  
Alignment score = 0.658951  
CCcGTGTtACcTtGAgctCCttgaGgtCCaGTaGCg

>Bacillus\_Fam\_200\_36\_4 Nr. of seq. 4 Alignment length(with gaps) = 36  
Alignment score = 0.780864  
CCAGTAGGtCCaGTGaTnCCaGTAAATCCgGTagcC

>Bacillus\_Fam\_201\_33\_4 Nr. of seq. 4 Alignment length(with gaps) = 35  
Alignment score = 0.651587  
CctCCCATCATgCctGgnTGaCcTCcTtgaTGA

>Bacillus\_Fam\_202\_27\_4 Nr. of seq. 4 Alignment length(with gaps) = 28  
Alignment score = 0.646825  
CCAgcTaaTCCTGTcGcTCCcGtTGct

>Bacillus\_Fam\_203\_27\_4 Nr. of seq. 4 Alignment length(with gaps) = 27  
Alignment score = 0.711934  
GGAGcaACaGGtcCaACaGGAATaaCa

>Bacillus\_Fam\_204\_25\_4 Nr. of seq. 4 Alignment length(with gaps) = 25  
Alignment score = 0.617778  
gCctccGctTCTGCCcTccGctTTTG

>Bacillus\_Fam\_205\_24\_4 Nr. of seq. 4 Alignment length(with gaps) = 24  
Alignment score = 0.805556  
CCtGaAAcAcCaGATCCAGaAAA

>Bacillus\_Fam\_206\_20\_4 Nr. of seq. 4 Alignment length(with gaps) = 23  
Alignment score = 0.718599  
TATGATCCATTtCaGAAATa

>Bacillus\_Fam\_207\_21\_4 Nr. of seq. 4 Alignment length(with gaps) = 23  
Alignment score = 0.642512  
aacaTgGAATAAACTCcGaaA

>Bacillus\_Fam\_208\_21\_4 Nr. of seq. 4 Alignment length(with gaps) = 22  
Alignment score = 0.604798  
tCTATTTGCaGnTTTccgatt

```

>Bacillus_Fam_209_22_4 Nr. of seq. 4 Alignment length(with gaps) = 22
Alignment score = 0.651515
AGTCGCAAGtAAaaGtGgnGan
>Bacillus_Fam_210_21_4 Nr. of seq. 4 Alignment length(with gaps) = 22
Alignment score = 0.650253
GTAGAgTAAAnTncagAAAtT
>Bacillus_Fam_211_21_4 Nr. of seq. 4 Alignment length(with gaps) = 22
Alignment score = 0.656566
TTaGCGAatTTCaaaCatTTA
>Bacillus_Fam_212_21_4 Nr. of seq. 4 Alignment length(with gaps) = 22
Alignment score = 0.631313
TAtCTACGAAAttTanAgATA
>Bacillus_Fam_213_21_4 Nr. of seq. 4 Alignment length(with gaps) = 22
Alignment score = 0.611111
AcaAaaaGAAATGaAAgaaGa
>Bacillus_Fam_214_22_4 Nr. of seq. 4 Alignment length(with gaps) = 22
Alignment score = 0.623737
aTTTATTGTCCgGAaaCaaatg
>Bacillus_Fam_215_22_4 Nr. of seq. 4 Alignment length(with gaps) = 22
Alignment score = 0.694444
aTCAGCCAAAgtagGnagGGAA
>Bacillus_Fam_216_22_4 Nr. of seq. 4 Alignment length(with gaps) = 22
Alignment score = 0.702020
ATCTCTCGGTTTTGCGnctttA
>Bacillus_Fam_217_22_4 Nr. of seq. 4 Alignment length(with gaps) = 22
Alignment score = 0.601010
tATTTGCGAATcTagcacctTT
>Bacillus_Fam_218_20_4 Nr. of seq. 4 Alignment length(with gaps) = 21
Alignment score = 0.669312
tTGCGagTTTctCcAtATAT
>Bacillus_Fam_219_20_4 Nr. of seq. 4 Alignment length(with gaps) = 21
Alignment score = 0.671958
ATtATCaAAAAanCaAtTAT
>Bacillus_Fam_220_21_4 Nr. of seq. 4 Alignment length(with gaps) = 21
Alignment score = 0.625661
AgTTgGCGGaaTTAtTtacGa
>Bacillus_Fam_221_21_4 Nr. of seq. 4 Alignment length(with gaps) = 21
Alignment score = 0.634921
AcTcaccgATAGAAacgCAAA
>Bacillus_Fam_222_21_4 Nr. of seq. 4 Alignment length(with gaps) = 21
Alignment score = 0.701058
TGTcgTAAGtggCtgAAAATa
>Bacillus_Fam_223_21_4 Nr. of seq. 4 Alignment length(with gaps) = 21
Alignment score = 0.666667
TATCAGCGaATtTaanCaaTa
>Bacillus_Fam_224_21_4 Nr. of seq. 4 Alignment length(with gaps) = 21
Alignment score = 0.724868
TTTACTGTCCacTTtTanccA
>Bacillus_Fam_225_20_4 Nr. of seq. 4 Alignment length(with gaps) = 20
Alignment score = 0.666667
TTATctgCGAtTtCtgattT
>Bacillus_Fam_226_20_4 Nr. of seq. 4 Alignment length(with gaps) = 20
Alignment score = 0.788889
aTTCAGgATAAATCccAAAA

```

```

>Bacillus_Fam_227_18_4 Nr. of seq. 4 Alignment length(with gaps) = 19
Alignment score = 0.688596
TCgCCtTGaGGtCCTtGT
>Bacillus_Fam_228_18_4 Nr. of seq. 4 Alignment length(with gaps) = 18
Alignment score = 0.641975
GTgAcgCCtGTaGgaCCA
>Bacillus_Fam_229_18_4 Nr. of seq. 4 Alignment length(with gaps) = 18
Alignment score = 0.716049
CCAGGaGAtCCaaGcaAa
>Bacillus_Fam_230_18_4 Nr. of seq. 4 Alignment length(with gaps) = 18
Alignment score = 0.864198
AGACCATtTGGtTTTGGc
>Bacillus_Fam_231_15_4 Nr. of seq. 4 Alignment length(with gaps) = 15
Alignment score = 0.700000
aCCgAAaaAAGaAGa
>Bacillus_Fam_232_12_4 Nr. of seq. 4 Alignment length(with gaps) = 12
Alignment score = 0.888889
GGCAACGGcAAt
>Bacillus_Fam_233_234_3 Nr. of seq. 3 Alignment length(with gaps) = 234
Alignment score = 0.864198

CCAAAACAACGACGAAGTATGTCAATGTGGAtAAaGGnTCcCATtTAATaTTaCGtTCnAAAGCCTCCaaaaC
GTCCAGCATTTTtaGcaAGCTTGgCAAGAGGngAAAAaGTGACGGTtTACTCtATTTCCGGGGAnTGGGCaAAA
GTAAAAGCCGGgAGCAAAACGGGCTATGTTTCATGCATCTTTTTTgCGAAcTCAAATCCcGAtAGCAaTGCAG
acACTTCTaCTCCaG
>Bacillus_Fam_234_213_3 Nr. of seq. 3 Alignment length(with gaps) = 222
Alignment score = 0.719720

TTAAACcTtCGgtCgGGtGCTGGcACgtctCatCGngTTtTaACgACnCTtCCTGTTGGaCagAAGCTtGAgC
TTCTTcAAAAAcAAGGCAATTGGTATCAAGTTAAAGCtGGtaacCAaActGGcTGGGTtTctGCTGAtTTcAT
TAAaAaCagAtGGtAATaatGTcGAAGaCAACAAGcCCTTCTcTtGGCTCTGCgACgActACaGCTCGC
>Bacillus_Fam_235_166_3 Nr. of seq. 3 Alignment length(with gaps) = 168
Alignment score = 0.659392

attaAcTcCnnaTCCacTATtccCGTCTcCCcAgCTGACCaaaATcGTTntCttCCCCACGtATACAnCGTtCC
ATCACTTGCTAAcGCTAcTgtgTGancnantCCTgCnGnTACTTGTTCGATctTGGCTCCTcCgGGgATnGng
ATCgCTgTCGGACTAGnttg
>Bacillus_Fam_236_151_3 Nr. of seq. 3 Alignment length(with gaps) = 159
Alignment score = 0.705101

GCCGATgAccAAGgtgCTtccgctTTTCTcTcTGCTAGCTCCAgCGCCTATCGGCTaGCGgATTTCTcCGTCT
cCTCCCTgCGATAAGtCAACATCAGCTCGTaCCTCGCTGTGTnTCCTTtATCTCAGtCgnAgacTctGaaAtC
CGtAC
>Bacillus_Fam_237_144_3 Nr. of seq. 3 Alignment length(with gaps) = 148
Alignment score = 0.644895

TGGTGGGAcGGncgaaGnTGGAGcnagTGGGAaAATCTtGGttCnCCgCaaGGnGGatTTGAaGGctCGCCag
gtGCTGTcTCaTGGGgacCAAATCGnATCGACTGtTTTGTcAGGGganGnaAtAAtCanATGTGGCAtAAa
>Bacillus_Fam_238_122_3 Nr. of seq. 3 Alignment length(with gaps) = 125
Alignment score = 0.682667

GGCTCGcTCAGAATgggAGGaggaTGGAGCTTCTGaCcTtGAgGCGCTtTTTGCcTCgnggGAAGAnGCGAAg
ccaCCGaacaTTCTaGCCaCTGgAGCTGGATatCaTTAAAAAGCGgAAgt

```

>Bacillus\_Fam\_239\_104\_3 Nr. of seq. 3 Alignment length(with gaps) = 104  
Alignment score = 0.978632

ATGCTAGAAACTGATTCAAAAGCTTGAACAAGAATATCTGTAAACATAAGATCCACCTCCAGTTTGAAAATAA  
GGAAAAAGAGAATTAGCCAAGAGTGCCGATA

>Bacillus\_Fam\_240\_84\_3 Nr. of seq. 3 Alignment length(with gaps) = 84  
Alignment score = 0.825397

AAGAGTTTTCaGaGATGCTTGAAGAAAGATCTCCcGAATGtGAtGAGTcTGAATcAATcAAaGAaGAaGatAC  
tTCAtTAGAAg

>Bacillus\_Fam\_241\_59\_3 Nr. of seq. 3 Alignment length(with gaps) = 66  
Alignment score = 0.611111

GGCTGGgTgCAAActGgnGGcAaATGGTATTACCTtAATcaAtcGGnGCgATGCAAACc

>Bacillus\_Fam\_242\_66\_3 Nr. of seq. 3 Alignment length(with gaps) = 66  
Alignment score = 0.752525

ACAGGcTGGGnAcAAGTAGanGGnAAATGGTACTaCCTaGATGcaAAtGatGGTggaGCAATGAAA

>Bacillus\_Fam\_243\_66\_3 Nr. of seq. 3 Alignment length(with gaps) = 66  
Alignment score = 1.000000

GGGGTCTGACCCCGTTTGTtATAATCAAGAGCTACGAACCCTTGTCTTTCCTGGAATTAACGCTTG

>Bacillus\_Fam\_244\_55\_3 Nr. of seq. 3 Alignment length(with gaps) = 58  
Alignment score = 0.607280

TaTTGGTGACCTTtTcTcTcTaGnaCaCttccccACTTtGGGCACCAAtGaGCCT

>Bacillus\_Fam\_245\_53\_3 Nr. of seq. 3 Alignment length(with gaps) = 57  
Alignment score = 0.606238

TGGcCCATTTAnCaCcTtAaTGGcCCAACATCcTCTcAtAacTtgAtTCTCAT

>Bacillus\_Fam\_246\_53\_3 Nr. of seq. 3 Alignment length(with gaps) = 56  
Alignment score = 0.684524

AAGTGGCGCCATTCTcGcanAGTGgTGCCACTTTTcGAGTGAngAGActCtCaa

>Bacillus\_Fam\_247\_50\_3 Nr. of seq. 3 Alignment length(with gaps) = 55  
Alignment score = 0.630303

TTTTCATTACcATTaACCTttATTTCGcACcgTAATTCgccCagCTcGga

>Bacillus\_Fam\_248\_51\_3 Nr. of seq. 3 Alignment length(with gaps) = 55  
Alignment score = 0.612121

GGTAACAGAGAagGCgTCTCAAgCCCCGAAGCaAGnagcGAAncnCnAAAC

>Bacillus\_Fam\_249\_53\_3 Nr. of seq. 3 Alignment length(with gaps) = 55  
Alignment score = 0.616162

aAACGGTAACAGAGAgGCCGTCTCAaaGCCcGAAGctgCTCngaactnCGCCa

>Bacillus\_Fam\_250\_51\_3 Nr. of seq. 3 Alignment length(with gaps) = 55  
Alignment score = 0.620202

GTTTcTCTtngAATCtTACCATTATAAatCggtTTCCCTcTGtAgtGGTAC

>Bacillus\_Fam\_251\_52\_3 Nr. of seq. 3 Alignment length(with gaps) = 55  
Alignment score = 0.634343

TACcCTTTTCcattCnCTcCTTCCCTTTTnTTGTcTCCATCtccnTTTGGt

>Bacillus\_Fam\_252\_53\_3 Nr. of seq. 3 Alignment length(with gaps) = 55  
Alignment score = 0.638384

ATGAAGGaCaatTaGGnnTGAAAtTTttGGTcGAAATGntgTTCATAAGcCCG

>Bacillus\_Fam\_253\_52\_3 Nr. of seq. 3 Alignment length(with gaps) = 55  
Alignment score = 0.731313

CCACCAAACCTTcttccTcAGcgCTTGATGGTTCTTATaaCCGTTTTcAGTA

>Bacillus\_Fam\_254\_53\_3 Nr. of seq. 3 Alignment length(with gaps) = 55  
Alignment score = 0.628283

TTGGCTaCCGTTCTTtcGCnnTcTcNcTcGgtTTCGGGatCCAtCacACCTCT

>Bacillus\_Fam\_255\_52\_3 Nr. of seq. 3 Alignment length(with gaps) = 55  
Alignment score = 0.660606

TAGACATTTcAAGCtnCAnCAGctTcTGAAATGTCTATTAAAcacCCTtTTaT  
 >Bacillus\_Fam\_256\_52\_3 Nr. of seq. 3 Alignment length(with gaps) = 55  
 Alignment score = 0.668687  
 CTCTATGtgCACTTtnCncGCTTTTTtcAtcGaTTTCGTGTTTCATTGaaGAC  
 >Bacillus\_Fam\_257\_52\_3 Nr. of seq. 3 Alignment length(with gaps) = 55  
 Alignment score = 0.634343  
 TGCATTGCCCAAAancGGtGAtAgAtcnAAAAtTTGGTCAAtGGAaGaGGGn  
 >Bacillus\_Fam\_258\_51\_3 Nr. of seq. 3 Alignment length(with gaps) = 55  
 Alignment score = 0.612121  
 aTTTaTTCTCTaAAGCtgCaaAAAttcGcAAGCTTcAGGTGAAtAAaGaG  
 >Bacillus\_Fam\_259\_52\_3 Nr. of seq. 3 Alignment length(with gaps) = 55  
 Alignment score = 0.723232  
 AATGTGTCTCAAGActgGatCTTGAGACAgATAAAgAGGGaGaAAggAgAAA  
 >Bacillus\_Fam\_260\_52\_3 Nr. of seq. 3 Alignment length(with gaps) = 55  
 Alignment score = 0.717172  
 ATGAAaACCAttTTctCTTCGGAACaAgGAgAAACGGTCTTCATgaCGGCg  
 >Bacillus\_Fam\_261\_53\_3 Nr. of seq. 3 Alignment length(with gaps) = 55  
 Alignment score = 0.640404  
 ACCGCAAGaangTTTTcacGGTACAtGCTCAntcAAAAAnAGancaAGCaTGT  
 >Bacillus\_Fam\_262\_53\_3 Nr. of seq. 3 Alignment length(with gaps) = 55  
 Alignment score = 0.696970  
 CGGGCACTATGAActCTcTATAGTgACCGCncaCTtCTTnTgAcTcCCTCctg  
 >Bacillus\_Fam\_263\_52\_3 Nr. of seq. 3 Alignment length(with gaps) = 54  
 Alignment score = 0.633745  
 GTCAAATAGAAcGgnTCTATAcGCCCCGAAnGCcCGtgaAAaAgaGgnaAAcG  
 >Bacillus\_Fam\_264\_52\_3 Nr. of seq. 3 Alignment length(with gaps) = 54  
 Alignment score = 0.641975  
 cTCAnGACACTTTTCTcTCTcnTTTTngnnTTTcATGtCCTTGAGAnaCTtC  
 >Bacillus\_Fam\_265\_52\_3 Nr. of seq. 3 Alignment length(with gaps) = 54  
 Alignment score = 0.637860  
 ACTTCGACTCattCCTCcagATttCCnCTttTtCTGTcCgAAAtGnTGACCn  
 >Bacillus\_Fam\_266\_52\_3 Nr. of seq. 3 Alignment length(with gaps) = 54  
 Alignment score = 0.699588  
 CGGATTCGACAAcattaCcgntTCatCCTgCTTccCTGTCCGAATATcAAG  
 >Bacillus\_Fam\_267\_53\_3 Nr. of seq. 3 Alignment length(with gaps) = 54  
 Alignment score = 0.627572  
 cTAAAGGACAAAActcgGatgnagCagCAAAGATnnGTCCATGAgAaGcggTc  
 >Bacillus\_Fam\_268\_52\_3 Nr. of seq. 3 Alignment length(with gaps) = 54  
 Alignment score = 0.633745  
 AGTGCCCatgCgCatGggAAAAagCcAAgnAcGGGCACTCTGAGaGGTtcAC  
 >Bacillus\_Fam\_269\_52\_3 Nr. of seq. 3 Alignment length(with gaps) = 54  
 Alignment score = 0.625514  
 atTTTTGAGGGTaCtatTCTGnctTtTtAGTgCCCTCAAttTTTgnTTTTcg  
 >Bacillus\_Fam\_270\_52\_3 Nr. of seq. 3 Alignment length(with gaps) = 54  
 Alignment score = 0.703704  
 gtGGAAATGaCCCTTCAGCAnGaTcaAAAtCtGtGcGAAGGTCACAAAgGCGc  
 >Bacillus\_Fam\_271\_53\_3 Nr. of seq. 3 Alignment length(with gaps) = 54  
 Alignment score = 0.600823  
 CGGGCACATGTtnGCctcTCTGTtACCgtgCtCTtgcttTTTcttgCTTtn  
 >Bacillus\_Fam\_272\_52\_3 Nr. of seq. 3 Alignment length(with gaps) = 54  
 Alignment score = 0.633745  
 CTCTCTTACCATCcnACcCtnTTtccTCnCGAAAtGGGCACTGACaACnnCT  
 >Bacillus\_Fam\_273\_53\_3 Nr. of seq. 3 Alignment length(with gaps) = 54  
 Alignment score = 0.651235



```

aCGGTAAAtGaAaGAgcGnTtCATTtACCGAAAAGngGaAAAAAnAgAGCnCTt
>Bacillus_Fam_274_52_3 Nr. of seq. 3 Alignment length(with gaps) = 54
Alignment score = 0.720165
CACAGTGCCnnGCncGGCTTTTTTggcctCGAcGGGCACTCTGaaCTCTT
>Bacillus_Fam_275_53_3 Nr. of seq. 3 Alignment length(with gaps) = 54
Alignment score = 0.672840
GgAACGAAAGAGgtGcATTcGTgCccgTaaGAGGnAAAAATtAGGAGAAgnCa
>Bacillus_Fam_276_53_3 Nr. of seq. 3 Alignment length(with gaps) = 54
Alignment score = 0.738683
gTGTACCgCTAGAcnCntCtTGCGGnACATGCTCacCcTATTTCaCaCCaAGC
>Bacillus_Fam_277_51_3 Nr. of seq. 3 Alignment length(with gaps) = 53
Alignment score = 0.639413
GAATAGAAgCnccCTATTCGACCGTTncACGnggTTtCacTTccTTCGGgc
>Bacillus_Fam_278_51_3 Nr. of seq. 3 Alignment length(with gaps) = 53
Alignment score = 0.635220
TGTCTGAACCTgagCTAACTTCGGACTnCttctGccTtTTTctcCtGAtCt
>Bacillus_Fam_279_51_3 Nr. of seq. 3 Alignment length(with gaps) = 53
Alignment score = 0.681342
ACTTTATtTtnGATTaTTaaTtgaAAATGTCTtTTCATaAGgtcGATGAAGg
>Bacillus_Fam_280_52_3 Nr. of seq. 3 Alignment length(with gaps) = 53
Alignment score = 0.666667
TTTtGtCCTTCATcCcCcttATGAAGGACcGTTCTCTGnAttTtnCnCcTcG
>Bacillus_Fam_281_52_3 Nr. of seq. 3 Alignment length(with gaps) = 53
Alignment score = 0.752621
aGTTTCTGCTGCTAAaTCcaGTTaAgAACACTTTCaCCGCaaACCaaCcAg
>Bacillus_Fam_282_52_3 Nr. of seq. 3 Alignment length(with gaps) = 53
Alignment score = 0.746331
cACAtGAAAAAnnGGCTcATAGAAcCTnTCTATGAACCCaAATTTgAtCGAAn
>Bacillus_Fam_283_52_3 Nr. of seq. 3 Alignment length(with gaps) = 53
Alignment score = 0.658281
TTGaCTnCCGTTCTTcCnCnCTTctCcTTTTTCGGgAGcCAcCaCnnCtCT
>Bacillus_Fam_284_52_3 Nr. of seq. 3 Alignment length(with gaps) = 53
Alignment score = 0.618449
CCTCCATCACcCtCATGGAgGACcttTTTTCCnntTctCaCgcnAnntcGGt
>Bacillus_Fam_285_52_3 Nr. of seq. 3 Alignment length(with gaps) = 53
Alignment score = 0.907757
AATGTGTGTCCAAGAGAnGAGcTGAAACACATTATAAGAGAAACCGGAGGAg
>Bacillus_Fam_286_53_3 Nr. of seq. 3 Alignment length(with gaps) = 53
Alignment score = 0.851153
ATTGGTTACCCgGTTGcGCgGATTTCACccGgACTCGGTCACCTTTcGGCNTG
>Bacillus_Fam_287_52_3 Nr. of seq. 3 Alignment length(with gaps) = 53
Alignment score = 0.633124
TTAAAGACATTTTgagCantttgAnaGGnaGTTtTGTCtTTAAGaAgGGcTA
>Bacillus_Fam_288_52_3 Nr. of seq. 3 Alignment length(with gaps) = 53
Alignment score = 0.731656
cTTATAAGCTACCCAACCTggggcganTttCtCGGtTTCGGTcGCTTATACCC
>Bacillus_Fam_289_52_3 Nr. of seq. 3 Alignment length(with gaps) = 53
Alignment score = 0.645702
nAAgTGTTTCCAATgAaGGCTATTGGcgACAAACTCagtangAAAanggGa
>Bacillus_Fam_290_52_3 Nr. of seq. 3 Alignment length(with gaps) = 53
Alignment score = 0.607966
TGGAatCACTTTaCTCTnTTTTnCTCcgagtTTTGTtTCCAATagccntgAT
>Bacillus_Fam_291_52_3 Nr. of seq. 3 Alignment length(with gaps) = 53
Alignment score = 0.714885

```

GCTGTCCGAAGTnGagTGAGGTTTCAGACAGcTTGaGggtgagAAGaGGAAAA  
>Bacillus\_Fam\_292\_52\_3 Nr. of seq. 3 Alignment length(with gaps) = 53  
Alignment score = 0.704403  
aaGGTTCGACAGCTTTtGcTcncaGGcanTCGAAGTTGTCCGAAGTnGctC  
>Bacillus\_Fam\_293\_52\_3 Nr. of seq. 3 Alignment length(with gaps) = 53  
Alignment score = 0.637317  
GTCTGAAGTCAccnTAGGTTTCgGACaCngtTGcAttTGaAATCaCtnaTCcT  
>Bacillus\_Fam\_294\_51\_3 Nr. of seq. 3 Alignment length(with gaps) = 52  
Alignment score = 0.651709  
TATaAGgAAGaaATGAGtGCTAAAgcgnAgGATAGanCattATaTTaCCAG  
>Bacillus\_Fam\_295\_52\_3 Nr. of seq. 3 Alignment length(with gaps) = 52  
Alignment score = 0.707265  
TtAAGGAAGncCGnnAAAAAgngtcnCTaTCTTAACgTAGAggCGTTCTAnG  
>Bacillus\_Fam\_296\_52\_3 Nr. of seq. 3 Alignment length(with gaps) = 52  
Alignment score = 0.841880  
GGcGCGCTtaCCcTAgCGCGnGgCTCTTCTcTCTTTTTCTTCTTCTTGGGA  
>Bacillus\_Fam\_297\_52\_3 Nr. of seq. 3 Alignment length(with gaps) = 52  
Alignment score = 0.675214  
AagCGTGTCATACgAgggCAATGcCaCATGAAAAAtaggaAncaAgcaAATA  
>Bacillus\_Fam\_298\_52\_3 Nr. of seq. 3 Alignment length(with gaps) = 52  
Alignment score = 0.688034  
AAaCGGtAACTAATcGtGagGAAAgGTtcCCGnTTtGtGcCcGagTtcGAAa  
>Bacillus\_Fam\_299\_52\_3 Nr. of seq. 3 Alignment length(with gaps) = 52  
Alignment score = 0.846154  
AAAGTGTTCTAanCCAGAGTTAGCAGCACAAAgTGAGTAGAgCaCaGgCcCg  
>Bacillus\_Fam\_300\_52\_3 Nr. of seq. 3 Alignment length(with gaps) = 52  
Alignment score = 0.811966  
GAGTTTgTGCTGCTAAcTCaGTtTgGAACACTTTcGcCgnGGaCCCGCACc  
>Bacillus\_Fam\_301\_52\_3 Nr. of seq. 3 Alignment length(with gaps) = 52  
Alignment score = 0.809829  
AAgGGTCATAAngaCaCaTGATtTAACCCTTCAGCATGAAGGAaAcTccGTG  
>Bacillus\_Fam\_302\_52\_3 Nr. of seq. 3 Alignment length(with gaps) = 52  
Alignment score = 0.760684  
CTGGAGTGACCGaAaAgCATntAgaAAAnGCaTtGGGTCAATGCAGatAGt  
>Bacillus\_Fam\_303\_52\_3 Nr. of seq. 3 Alignment length(with gaps) = 52  
Alignment score = 0.713675  
GACTgCTTTtacGGAAAAagGCGgAAAgctGTcCGAACTTGgGgcTACTTCg  
>Bacillus\_Fam\_304\_52\_3 Nr. of seq. 3 Alignment length(with gaps) = 52  
Alignment score = 0.675214  
AATCGTtaCCgTTTcanATGnGAnCACggCAAnAcGGtAACGAtTCaGAGcn  
>Bacillus\_Fam\_305\_52\_3 Nr. of seq. 3 Alignment length(with gaps) = 52  
Alignment score = 0.705128  
GGcTnATTcGGACAGaaCAAgcnagAAatGcCgnTAGAGAGTCCgAATGCAA  
>Bacillus\_Fam\_306\_52\_3 Nr. of seq. 3 Alignment length(with gaps) = 52  
Alignment score = 0.726496  
tGaTTGaTTACCTGaaGatGaAAATTGcatgTGTACGGgAACCAтанаGAG  
>Bacillus\_Fam\_307\_52\_3 Nr. of seq. 3 Alignment length(with gaps) = 52  
Alignment score = 0.899573  
GGTAACCATTGagGGcCTTTGGTGACCCTTTnGGNGGAAAACTCCTTTCTcTC  
>Bacillus\_Fam\_308\_52\_3 Nr. of seq. 3 Alignment length(with gaps) = 52  
Alignment score = 0.929487  
AGAAAAGAGGAAGAAAGGTAACCAATCGCtCGGAAAGGTTaCCGAAActnGAA  
>Bacillus\_Fam\_309\_52\_3 Nr. of seq. 3 Alignment length(with gaps) = 52  
Alignment score = 0.739316

TgGAtACACATTtTgngAGAATATTgcaGAtAATgTGTCTCAAGgATgGcGg  
>Bacillus\_Fam\_310\_52\_3 Nr. of seq. 3 Alignment length(with gaps) = 52  
Alignment score = 0.982906  
CTTAAATAGAGGAAACCAgGTGTGTAGGGTAACTAAAGCGAGCGAAAGGTTA  
>Bacillus\_Fam\_311\_52\_3 Nr. of seq. 3 Alignment length(with gaps) = 52  
Alignment score = 0.730769  
aGGTTACCGAaTCcatGAGAAATCCACCTanAGGGTAACgAAaCnaGcgcaA  
>Bacillus\_Fam\_312\_52\_3 Nr. of seq. 3 Alignment length(with gaps) = 52  
Alignment score = 0.649573  
AAAGGnAGAAGAGaGngcGTcTCAnCGCCCAtcTGAgngAGAAAnAagaGaaG  
>Bacillus\_Fam\_313\_52\_3 Nr. of seq. 3 Alignment length(with gaps) = 52  
Alignment score = 0.675214  
TATGGGACAnttgcTTncnntTtTCnGCTtnTTTTGTCTcATTGAGCtCTCC  
>Bacillus\_Fam\_314\_52\_3 Nr. of seq. 3 Alignment length(with gaps) = 52  
Alignment score = 0.982906  
AAAAGGGAACATAGAGTCCTTGTATGTACGCGAAACTGGTGgGAAGACTCCG  
>Bacillus\_Fam\_315\_52\_3 Nr. of seq. 3 Alignment length(with gaps) = 52  
Alignment score = 0.946581  
GAGCAAAGAACATGTCATCATCGAnaGGATGAAGACACGAATAGAAgTGTAG  
>Bacillus\_Fam\_316\_48\_3 Nr. of seq. 3 Alignment length(with gaps) = 48  
Alignment score = 0.981481  
TTCTTCTGATGACGTTGAGAACGACTCAGAtGCTGACAGTGACGATGA  
>Bacillus\_Fam\_317\_45\_3 Nr. of seq. 3 Alignment length(with gaps) = 46  
Alignment score = 0.666667  
GnACAAAAGCCAGAcGATAnCgAAAcAAAACCGgATGAccAAaACg  
>Bacillus\_Fam\_318\_40\_3 Nr. of seq. 3 Alignment length(with gaps) = 43  
Alignment score = 0.666667  
AAAtCGCAGATAAgTnaTGAAAcCGCAGATAACTCGtGa  
>Bacillus\_Fam\_319\_39\_3 Nr. of seq. 3 Alignment length(with gaps) = 42  
Alignment score = 0.722222  
AtAAAAAATcTtTaCTGtTCTCACAAaAGATCnCGCAGCc  
>Bacillus\_Fam\_320\_42\_3 Nr. of seq. 3 Alignment length(with gaps) = 42  
Alignment score = 0.978836  
GCAGAAGAGAAAGTAgCAGAATTAAACAGACGAAGCAAAAT  
>Bacillus\_Fam\_321\_40\_3 Nr. of seq. 3 Alignment length(with gaps) = 40  
Alignment score = 0.766667  
tAAGAGTATTTCCgatTTCCGAAGAGTaTcCncGCAAAAGT  
>Bacillus\_Fam\_322\_39\_3 Nr. of seq. 3 Alignment length(with gaps) = 39  
Alignment score = 0.863248  
ACaaCaCCTCCAGCaATAAcGGAGGAGGtCAAGGAAAT  
>Bacillus\_Fam\_323\_39\_3 Nr. of seq. 3 Alignment length(with gaps) = 39  
Alignment score = 0.749288  
TCAggggCAACAgaaAcACTCTAAgCAAGACgACTCcaA  
>Bacillus\_Fam\_324\_36\_3 Nr. of seq. 3 Alignment length(with gaps) = 36  
Alignment score = 0.811728  
tAAGAAaCAAGAAgAgGCgAAAAAgCTAGAAGAGag  
>Bacillus\_Fam\_325\_36\_3 Nr. of seq. 3 Alignment length(with gaps) = 36  
Alignment score = 0.969136  
AATGCAACAAGGGATGGGAGGAAACCACCAngCCCC  
>Bacillus\_Fam\_326\_34\_3 Nr. of seq. 3 Alignment length(with gaps) = 35  
Alignment score = 0.615873  
CGACGAGtAAtCGCAGGAGCAnacgGtttttnaTG  
>Bacillus\_Fam\_327\_25\_3 Nr. of seq. 3 Alignment length(with gaps) = 26  
Alignment score = 0.846154

```

tTGTgCCTGGCACCTTTtCCCCTTT
>Bacillus_Fam_328_24_3 Nr. of seq. 3 Alignment length(with gaps) = 24
Alignment score = 0.759259
GaAaCCgCCCATGCCCATtcCnGG
>Bacillus_Fam_329_21_3 Nr. of seq. 3 Alignment length(with gaps) = 23
Alignment score = 0.661836
TTTACTGGCGGAtAnCnCCaC
>Bacillus_Fam_330_21_3 Nr. of seq. 3 Alignment length(with gaps) = 23
Alignment score = 0.642512
gttnTgtcTaTtTttntGagn
>Bacillus_Fam_331_21_3 Nr. of seq. 3 Alignment length(with gaps) = 23
Alignment score = 0.671498
GTTGGCgCAAAAGtATCtCG
>Bacillus_Fam_332_21_3 Nr. of seq. 3 Alignment length(with gaps) = 23
Alignment score = 0.690821
TTCGCAAATAAAaCCnTcAtA
>Bacillus_Fam_333_21_3 Nr. of seq. 3 Alignment length(with gaps) = 23
Alignment score = 0.637681
TGACGGGATtnTCTcGngTTa
>Bacillus_Fam_334_23_3 Nr. of seq. 3 Alignment length(with gaps) = 23
Alignment score = 0.647343
TCnATaCgGACAaGAGcgAGcGc
>Bacillus_Fam_335_23_3 Nr. of seq. 3 Alignment length(with gaps) = 23
Alignment score = 0.743961
TATTTGCGAATTaCctnGcntTT
>Bacillus_Fam_336_20_3 Nr. of seq. 3 Alignment length(with gaps) = 22
Alignment score = 0.676768
TaTATCGGCGAtTCTCgAtT
>Bacillus_Fam_337_20_3 Nr. of seq. 3 Alignment length(with gaps) = 22
Alignment score = 0.651515
GACGCAAAAAnccttgGTGGa
>Bacillus_Fam_338_21_3 Nr. of seq. 3 Alignment length(with gaps) = 22
Alignment score = 0.732323
ATCAGCCAAAGcAGnTGnGAT
>Bacillus_Fam_339_21_3 Nr. of seq. 3 Alignment length(with gaps) = 22
Alignment score = 0.772727
tTTGGCTGATTTCTcCTCCgc
>Bacillus_Fam_340_21_3 Nr. of seq. 3 Alignment length(with gaps) = 22
Alignment score = 0.616162
nnTGGATCATAAAATctccAAt
>Bacillus_Fam_341_21_3 Nr. of seq. 3 Alignment length(with gaps) = 22
Alignment score = 0.727273
aCTCCTATAATAAAaAngaTA
>Bacillus_Fam_342_22_3 Nr. of seq. 3 Alignment length(with gaps) = 22
Alignment score = 0.636364
TTTGGCGGAATtnCcantnaAg
>Bacillus_Fam_343_21_3 Nr. of seq. 3 Alignment length(with gaps) = 22
Alignment score = 0.737374
TACGaGAGTAAnCgCACTCnT
>Bacillus_Fam_344_21_3 Nr. of seq. 3 Alignment length(with gaps) = 22
Alignment score = 0.747475
CTTGAGCGGTATTcncCTCcn
>Bacillus_Fam_345_21_3 Nr. of seq. 3 Alignment length(with gaps) = 22
Alignment score = 0.727273

```

TtAACCaCTGCTaTTCGTCgG

>Bacillus\_Fam\_346\_21\_3 Nr. of seq. 3 Alignment length(with gaps) = 22  
Alignment score = 0.631313  
TGTCCCATAnAaTcgAAgTnn

>Bacillus\_Fam\_347\_18\_3 Nr. of seq. 3 Alignment length(with gaps) = 21  
Alignment score = 0.767196  
CCAGGAgCAGGcTTTGGC

>Bacillus\_Fam\_348\_20\_3 Nr. of seq. 3 Alignment length(with gaps) = 21  
Alignment score = 0.708995  
GtAGGaCGAAATATTtGcGT

>Bacillus\_Fam\_349\_20\_3 Nr. of seq. 3 Alignment length(with gaps) = 21  
Alignment score = 0.687831  
ACTGtCACTATnccnAAAAAT

>Bacillus\_Fam\_350\_21\_3 Nr. of seq. 3 Alignment length(with gaps) = 21  
Alignment score = 0.687831  
tTTATTTGCGATAacTaCgtc

>Bacillus\_Fam\_351\_21\_3 Nr. of seq. 3 Alignment length(with gaps) = 21  
Alignment score = 0.957672  
GCCAACCAACCGTGTCCgCCTT

>Bacillus\_Fam\_352\_21\_3 Nr. of seq. 3 Alignment length(with gaps) = 21  
Alignment score = 0.788360  
AGAACGgCGAGagCgGCGaGT

>Bacillus\_Fam\_353\_21\_3 Nr. of seq. 3 Alignment length(with gaps) = 21  
Alignment score = 0.661376  
ATtCCGCGAAAncnGAGnngA

>Bacillus\_Fam\_354\_21\_3 Nr. of seq. 3 Alignment length(with gaps) = 21  
Alignment score = 0.756614  
AACCGAGAGAtTAaggGcTga

>Bacillus\_Fam\_355\_21\_3 Nr. of seq. 3 Alignment length(with gaps) = 21  
Alignment score = 0.788360  
GATGtGAGagAGAAGaGCgCG

>Bacillus\_Fam\_356\_21\_3 Nr. of seq. 3 Alignment length(with gaps) = 21  
Alignment score = 0.671958  
ATTCCGCCAAcTtnGGannngN

>Bacillus\_Fam\_357\_20\_3 Nr. of seq. 3 Alignment length(with gaps) = 20  
Alignment score = 0.711111  
GaCGCAAaTATtgTGAAact

>Bacillus\_Fam\_358\_20\_3 Nr. of seq. 3 Alignment length(with gaps) = 20  
Alignment score = 0.877778  
CaCaTATAAAAAGCTcCAACT

>Bacillus\_Fam\_359\_20\_3 Nr. of seq. 3 Alignment length(with gaps) = 20  
Alignment score = 0.788889  
TATCaGGAAAAaTtnAATA

>Bacillus\_Fam\_360\_18\_3 Nr. of seq. 3 Alignment length(with gaps) = 18  
Alignment score = 0.703704  
GGtGgaCCnGGnTTCGGT

>Bacillus\_Fam\_361\_18\_3 Nr. of seq. 3 Alignment length(with gaps) = 18  
Alignment score = 0.746914  
TCAGCAGTAGagTCnGcg

>Bacillus\_Fam\_362\_18\_3 Nr. of seq. 3 Alignment length(with gaps) = 18  
Alignment score = 0.679012  
TGctcATGATggTGnTCA

>Bacillus\_Fam\_363\_16\_3 Nr. of seq. 3 Alignment length(with gaps) = 16  
Alignment score = 0.722222

AACCCGGGTTaaaGgg  
 >Bacillus\_Fam\_364\_15\_3 Nr. of seq. 3 Alignment length(with gaps) = 15  
 Alignment score = 0.762963  
 GTtTTTCTTCTtTtaG  
 >Bacillus\_Fam\_365\_15\_3 Nr. of seq. 3 Alignment length(with gaps) = 15  
 Alignment score = 0.837037  
 TCTGgTTTtTCTACT  
 >Bacillus\_Fam\_366\_15\_3 Nr. of seq. 3 Alignment length(with gaps) = 15  
 Alignment score = 0.755556  
 TCTTCTTCAGTnacG  
 >Bacillus\_Fam\_367\_12\_3 Nr. of seq. 3 Alignment length(with gaps) = 12  
 Alignment score = 0.675926  
 TnCTTtGTtATt  
 >Bacillus\_Fam\_368\_12\_3 Nr. of seq. 3 Alignment length(with gaps) = 12  
 Alignment score = 0.666667  
 ATagAAnAAGGt  
 >Bacillus\_Fam\_369\_12\_3 Nr. of seq. 3 Alignment length(with gaps) = 12  
 Alignment score = 0.777778  
 GCTGCTgCaACg  
 >Bacillus\_Fam\_370\_12\_3 Nr. of seq. 3 Alignment length(with gaps) = 12  
 Alignment score = 0.888889  
 CCAGGnGAAGAA  
 >Bacillus\_Fam\_371\_12\_3 Nr. of seq. 3 Alignment length(with gaps) = 12  
 Alignment score = 0.777778  
 CACCAgCACCaA  
 >Bacillus\_Fam\_372\_12\_3 Nr. of seq. 3 Alignment length(with gaps) = 12  
 Alignment score = 1.000000  
 CCGTAACCGCCG  
 >Bacillus\_Fam\_373\_12\_3 Nr. of seq. 3 Alignment length(with gaps) = 12  
 Alignment score = 0.777778  
 TGaCCtTGaCCT  
 >Bacillus\_Fam\_374\_12\_3 Nr. of seq. 3 Alignment length(with gaps) = 12  
 Alignment score = 0.777778  
 GAAgCaGAAgCA  
 >Bacillus\_Fam\_375\_240\_2 Nr. of seq. 2 Alignment length(with gaps) = 240  
 Alignment score = 0.920833

GGTTGGGCGAAAGTGAaTGTAATGGGAAACAGGaTATGTAAGTAGTCAaTATTTAACAGGCAAGACGAACA  
 CAGCCCCAtCAAAACCaTCaACATCCACACCAGCAAAAGACGGAAACAAAATATGTATCTGTAACTCAGGTTC  
 TAtTTTGAATCTACGCAGTAGTGCCAGTACAAGTGCATCaATAATCGGGAAcCTaACAAATGGCACAGCaGTA  
 ACGGTTCAATCAGATTCCAAa

>Bacillus\_Fam\_376\_210\_2 Nr. of seq. 2 Alignment length(with gaps) = 210  
 Alignment score = 0.853968

GGCTGGTACAGTGATGAAGCACgAACGAATTTGTACGATTTTaAtGaGCCAGTNAAAGCAGCgAcaAagTTGT  
 ATGCGAAATGGACcCATAATCAATATGAAGTaAaTTTTGATACNAATGGCGGcAGTNANaTTGCTTCgGAAAA  
 TGTGAANTACAATGAAAAAGCaANGAAGCCAgNaGtACCAACGAAAGAAGGcTACACCTTCGCN

>Bacillus\_Fam\_377\_200\_2 Nr. of seq. 2 Alignment length(with gaps) = 200  
 Alignment score = 0.746667

ATTGATAAAACaGCTCCAGTcGTAAcTGGaGTTAgAAaACaACGGcCTtTACAATaAaGATGTaACAgTTTCa  
 TTTAATGAAGGAACaGCgACATTAAATGGTAAaGaAgTgaaAaCTGGaACAGcAGTTAAaCAAGAtGGAacc  
 TAcACAgTAGTGGTAAcCaGAcGCAGCAGGaAAcAAACaAcTGTgAAGTTCACg

>Bacillus\_Fam\_378\_154\_2 Nr. of seq. 2 Alignment length(with gaps) = 154  
Alignment score = 0.696970

ACATGTGGCATCAcTTCTTcACCGCTTCTAAGAAAAaCgAAAAACgaGcTTcacTaagcTCGTTTTTaaTcaA  
aacATAaGAGAGTgaTAAAAAtAtGGCGGTGGAAaTGAAgCCACGCGTAGTAGaGAGAAGAGCACTCACTACTA  
CTTTAAAAa

>Bacillus\_Fam\_379\_153\_2 Nr. of seq. 2 Alignment length(with gaps) = 153  
Alignment score = 0.644880

aATAAGTCAACATCGAaTCGCTaaCGCTCaTCGTGTTTCCTTTATcTcGATgCcAAaCCCTCCAagCCaTACa  
cCcCTAAACaGgCGccTCCGCTTTTCTaTTGTCCAGCTcCacCgCCcAgGcGCTaATcGaccTtCGGccTTcT  
CaCCTaC

>Bacillus\_Fam\_380\_148\_2 Nr. of seq. 2 Alignment length(with gaps) = 148  
Alignment score = 0.718468

TAGAcGAaGCaACAAAAGAAAAAGCGAAaTCaATcTTaGAaCAAGAAAAaTCCGGaAaAcTAACaCGTGAAcA  
AGCAAAAGAaaaATTaAaAaAaCTAGGcGTGAAATTCCCaGAGAAAGGgtAAGCAcGaaGAcATGTTcGCgAA  
cT

>Bacillus\_Fam\_381\_145\_2 Nr. of seq. 2 Alignment length(with gaps) = 145  
Alignment score = 0.671264

CCACCATTtATGCCACAgATgaTCGTTGTcTCCaCgGACAAAgGTATCaATcCGaTTcGccCCCCATGATAAA  
GCacCCGgtAGaCCCTtcAAaCCaCccCGCGGaGcCCaAGaTcTCCCAaTCaCTCCAGCgcGAACCaTC

>Bacillus\_Fam\_382\_140\_2 Nr. of seq. 2 Alignment length(with gaps) = 140  
Alignment score = 0.814286

ATCGTCCGaAAACTaTAAaACGcCGCGGGGTGGAGCAACGAGCaAaGCATCAgTGAAAAaCaAaCGAGTTGTc  
TCGACGCATaaGCAgCGaAGCaAAGCAaGAAGAGGAAGAGACAGTCAAAGGACaTCGAAGCaAaAGC

>Bacillus\_Fam\_383\_138\_2 Nr. of seq. 2 Alignment length(with gaps) = 138  
Alignment score = 0.990338

GTTGTCTCGGAAGCGAGGCTTCGTGAAGAGCAGGAAAAATGAAGAGGAAGAAGCTGAGCGGTCAGCGCCATTGG  
CTTTAAAGCAGAGGAAGCGGCGGTATAAAAGCAGAAGAAGCGCCAGCTGAGCCGCCaGAGCTT

>Bacillus\_Fam\_384\_128\_2 Nr. of seq. 2 Alignment length(with gaps) = 128  
Alignment score = 0.695312

acCTCGAGGTCATAAGCcAAAaacaCCAAAAGGCaAAGaACGCCTTTCCGGtaAGTctTCaTCTTATGCTTG  
TCGcCcCaGAGCaAcCCgCCTCCGCTTTTCTacaTGTCCAGCTaCGGCGccTaGa

>Bacillus\_Fam\_385\_127\_2 Nr. of seq. 2 Alignment length(with gaps) = 127  
Alignment score = 0.616798

TcCGCTTTTCTcTTGTcCAGCTGCAGcGCTcTaGcCCTCGaGGTcAAATAACCTaCCTcaAaaAAGcCAAAa  
AGCGGaCTTcTTGtgCaGgaAGAACATTTaCcgGTcCGGaGCaGAaCAaGaGcCT

>Bacillus\_Fam\_386\_127\_2 Nr. of seq. 2 Alignment length(with gaps) = 127  
Alignment score = 0.619423

cAGCTaGACAtAgCaaAGAAAAGCGGaGcCGACTGcTCaGcccCGACAAGCATAaGAccGGCTgGcGaaGCGG  
CGCaGTTTGCCGCaAGcCAGACcaaCaTATGACCTCGAGcccCaAGGAGcCaa

>Bacillus\_Fam\_387\_127\_2 Nr. of seq. 2 Alignment length(with gaps) = 127  
Alignment score = 0.674541

GGGcGAAgAAATCTCGACGCTCcTaccCGCCGcAGCTaGAcAaAGAAAAGCGaAGGCGGGTTGcaCAGGAGCG  
AGAAATgTcTGGAGcaCCTGACAAAAaGAAaTCCCGcccTTGGCTaaCGcTTGcCa

>Bacillus\_Fam\_388\_96\_2 Nr. of seq. 2 Alignment length(with gaps) = 96  
Alignment score = 1.000000

GTTCGTTTCGCTTCTTCTTGGTCCATTTGCCCCGGAACGCCTCGGTTCCACTCATTACCTCTGCCTCTTCAAT  
CTCTGGTTCCTCCGCGTCCATACC

>Bacillus\_Fam\_389\_84\_2 Nr. of seq. 2 Alignment length(with gaps) = 84  
Alignment score = 0.603175

TGGCGAGcTTgccGctgCGaGgCGaCGaGGTTcGgacCaTACCTCGACGTACCTCTccCcTCCAGTGGCGAGG  
caGccaCCaTg

>Bacillus\_Fam\_390\_84\_2 Nr. of seq. 2 Alignment length(with gaps) = 84  
Alignment score = 0.904762

GGAAAAAGTAACAGCaGGTTTAAATACGTAAATaGCAAAACaGGTGAGATGCAGACTGGTATAGGGAAATTAG  
TAGAcGGgTCa

>Bacillus\_Fam\_391\_78\_2 Nr. of seq. 2 Alignment length(with gaps) = 78  
Alignment score = 0.914530

GAAGATCTTGaTGACCGATATGATTTGGAaGAACTTTTGaaTCTGATGAACGATCATATgTTGACGATTGAT  
AATCT

>Bacillus\_Fam\_392\_75\_2 Nr. of seq. 2 Alignment length(with gaps) = 75  
Alignment score = 0.951111

CTTTCCGCCAACGATGCCGACTCATTTTTACCAGaAAACTCCGGNTCGGCCTGCCATTTCATCCTGCaCCACTC  
CA

>Bacillus\_Fam\_393\_74\_2 Nr. of seq. 2 Alignment length(with gaps) = 74  
Alignment score = 0.689189

TTcacCTgcTTGTCaTcAgTTTgaCTGTTTGTGcTTTTCaTCAGcAGAACCATTcGTTGATTTCTCTTCct  
t

>Bacillus\_Fam\_394\_67\_2 Nr. of seq. 2 Alignment length(with gaps) = 67  
Alignment score = 0.611940

GTCATATCTCCATCTAaTCCGTTGCTGTGATATGATatNAATGnCngTaTatttCtgtATNcgttAt

>Bacillus\_Fam\_395\_66\_2 Nr. of seq. 2 Alignment length(with gaps) = 66  
Alignment score = 0.626263

TGGTAcTACTTggatGAAGcAgcTAGCGGaGCAATGaAAACAGGTTGGTTGaAagACGaaGaAAAC

>Bacillus\_Fam\_396\_62\_2 Nr. of seq. 2 Alignment length(with gaps) = 62  
Alignment score = 0.618280

GGTGTAAATGCAAACaGGcTGGcAcAAAGATcGGcAGcAAGtaaGTAcTACTTcGaCaaAAAC

>Bacillus\_Fam\_397\_61\_2 Nr. of seq. 2 Alignment length(with gaps) = 61  
Alignment score = 0.661202

TGGTGCGATGAAaACNGGcTGGgTnTaAAcCTGGcgccAaaTGGTATTACTTAGAaAAAAa

>Bacillus\_Fam\_398\_60\_2 Nr. of seq. 2 Alignment length(with gaps) = 60  
Alignment score = 0.911111

AAATGGTACTAcCTTAACGCAAACGGCGAaATGGCAACAGGCTGGAAaCTGGTTAGCGGa

>Bacillus\_Fam\_399\_60\_2 Nr. of seq. 2 Alignment length(with gaps) = 60  
Alignment score = 0.811111

AAATGGTACTAcCTcCAaGCTGAcGGcgCNATGAAAACCGGCTGGCTgAGCACAAAcAAC

>Bacillus\_Fam\_400\_60\_2 Nr. of seq. 2 Alignment length(with gaps) = 60  
Alignment score = 0.716667

TATTcAaGTAATACCAcTTaCCCCaAaagaTAaCCAGCCTGTTTGCATTaCTCCgGAAC

>Bacillus\_Fam\_401\_60\_2 Nr. of seq. 2 Alignment length(with gaps) = 60  
Alignment score = 0.688889

CCTGGTAaTGGaCCcTCaAAATTCCGTGGaTATGGgaaaTTCCAacCTCCaCCaTTTGGa



>Bacillus\_Fam\_402\_57\_2 Nr. of seq. 2 Alignment length(with gaps) = 57  
Alignment score = 0.625731  
cGGCTTCATGAAGCacTtCATGGCGACCgTTTTcagCCggCTaCcCtTCgaTTTTTg

>Bacillus\_Fam\_403\_57\_2 Nr. of seq. 2 Alignment length(with gaps) = 57  
Alignment score = 0.605263  
aGATGAAGACCGcTTTAtGcAccGGAtccAgGCTaGAGGAAAGGTTcTCATAGCgAG

>Bacillus\_Fam\_404\_57\_2 Nr. of seq. 2 Alignment length(with gaps) = 57  
Alignment score = 0.684211  
AacAAGAAAGGTCACCAAcAAGGCcCATTGGTGCCCAAGTgggAAGaGTcTGctag

>Bacillus\_Fam\_405\_56\_2 Nr. of seq. 2 Alignment length(with gaps) = 56  
Alignment score = 0.636905  
ATGAAGACCTGtcaAtGGAAGAAAtttgaAGTaGGAAGAGatGTCaTCATAAGGTGG

>Bacillus\_Fam\_406\_56\_2 Nr. of seq. 2 Alignment length(with gaps) = 56  
Alignment score = 0.622024  
TCTCTcTTACCGtTTTTCTgTTTcccGAAtcGcagTTCGGGCACaGAGAcCGCCT

>Bacillus\_Fam\_407\_56\_2 Nr. of seq. 2 Alignment length(with gaps) = 56  
Alignment score = 0.601190  
GTTCCCGTCAGGCTCtgacTTTTCTgCTGACGGGCACTTcCtGctcaCAacTTA

>Bacillus\_Fam\_408\_56\_2 Nr. of seq. 2 Alignment length(with gaps) = 56  
Alignment score = 0.669643  
aCTTCGGACAGCTTTaGCTtCTTTcAGaGCTtcAAAGCTGTCTGAACtCTGGaCTc

>Bacillus\_Fam\_409\_56\_2 Nr. of seq. 2 Alignment length(with gaps) = 56  
Alignment score = 0.625000  
TTTGTTCAATAGAcAGaCcTCTATcGGACAAActCTATcGATtCaaGcCTATccGT

>Bacillus\_Fam\_410\_56\_2 Nr. of seq. 2 Alignment length(with gaps) = 56  
Alignment score = 0.601190  
TaTaGaGGTTGcCGATTGaagGTcgTGaGAGGAATCgGaGGTaGTCAAAGAGaGCC

>Bacillus\_Fam\_411\_55\_2 Nr. of seq. 2 Alignment length(with gaps) = 55  
Alignment score = 0.654545  
cTCAAGACACTTTccTcaGCTaATTTTAcCCgGTTcATGTCCTTGAGAcAcCTCC

>Bacillus\_Fam\_412\_55\_2 Nr. of seq. 2 Alignment length(with gaps) = 55  
Alignment score = 0.624242  
CTTCATCAaCCtCGATGAAGGACTTTCCacCgAgcAaTcTaCgCTcCATTCGaGA

>Bacillus\_Fam\_413\_55\_2 Nr. of seq. 2 Alignment length(with gaps) = 55  
Alignment score = 0.633333  
CacAAaAAATGGgAGcTAATCGaAATGAATAACGACGAAAAAGaaacCTcTacnc

>Bacillus\_Fam\_414\_55\_2 Nr. of seq. 2 Alignment length(with gaps) = 55  
Alignment score = 0.639394  
TTTTGTCTTTAATAAGGGcTCTTAAAGACaaAaaTcCAGcGAAAgGaaCATGcag

>Bacillus\_Fam\_415\_55\_2 Nr. of seq. 2 Alignment length(with gaps) = 55  
Alignment score = 0.642424  
TTCATAAAGCCCGtcGaCaGagGAAAAAGccGtCaaAgCGGTCAATAAGAGaGG

>Bacillus\_Fam\_416\_55\_2 Nr. of seq. 2 Alignment length(with gaps) = 55  
Alignment score = 0.624242  
TTTGTCcaATAGAGCCTTTCTATcGGACActTTTcTCCGaTTcTTgCaCgTcCcT

>Bacillus\_Fam\_417\_55\_2 Nr. of seq. 2 Alignment length(with gaps) = 55  
Alignment score = 0.636364  
AaTTGCTCCagCTGATTTATaaGGaACCATAaATTGacgCTTTTTGaTaCCCCATA

>Bacillus\_Fam\_418\_55\_2 Nr. of seq. 2 Alignment length(with gaps) = 55  
Alignment score = 0.624242  
CCTcCATTCGGACTCaGAGAcAcCaCTTgCtCTCgCTcgGcCTGTCCGAATCAGa

>Bacillus\_Fam\_419\_55\_2 Nr. of seq. 2 Alignment length(with gaps) = 55  
Alignment score = 0.669697  
tTCAAAAGACCAAGAGGAAGGaAAAcCaGaaGtCGAGATGgcCTTTATaaGGGa

>Bacillus\_Fam\_420\_55\_2 Nr. of seq. 2 Alignment length(with gaps) = 55  
Alignment score = 0.627273  
GGTAACAATAGaacaAGTATcGTGCCCCGAAATCAAGcccGtAAGaAGGcAAaAac

>Bacillus\_Fam\_421\_55\_2 Nr. of seq. 2 Alignment length(with gaps) = 55  
Alignment score = 0.630303  
GGggATGAAGGACgaaAggaCGAaGAGAGAAcngCGAcGAAaAGTCCTTCATCGA

>Bacillus\_Fam\_422\_55\_2 Nr. of seq. 2 Alignment length(with gaps) = 55  
Alignment score = 0.624242  
TTTCGGACTCAaCAggcTaaaAAAgTATGCaCgCggcTGTCCGAATCAAGcGCTC

>Bacillus\_Fam\_423\_55\_2 Nr. of seq. 2 Alignment length(with gaps) = 55  
Alignment score = 0.651515  
TcTGTCTTTAGcACGCTcTCTCTcaGACAtCTTcCTCCCTgaTTCTcaCCCACT

>Bacillus\_Fam\_424\_55\_2 Nr. of seq. 2 Alignment length(with gaps) = 55  
Alignment score = 0.612121  
ACCgaaaaTaTCAtAgagTTcCCTCTTTTTTCGGGCAATGCAACCCaCTccCATTa

>Bacillus\_Fam\_425\_55\_2 Nr. of seq. 2 Alignment length(with gaps) = 55  
Alignment score = 0.603030  
gATGAAGGACaTTTTcGcCATgGGaAACCAaCcTCGaTaaGGgCTTCATCgACGCC

>Bacillus\_Fam\_426\_55\_2 Nr. of seq. 2 Alignment length(with gaps) = 55  
Alignment score = 0.657576  
gAAACAGGACANgAAACCCCAGTAActTGGaAAATaGaGAGaCGtGtAAAtGAGaG

>Bacillus\_Fam\_427\_55\_2 Nr. of seq. 2 Alignment length(with gaps) = 55  
Alignment score = 0.690909  
aaCGAGcAGaAGAAaAAAtgaGAaAACGGTAActATaaAGCGTTCATaATGCCCCG

>Bacillus\_Fam\_428\_55\_2 Nr. of seq. 2 Alignment length(with gaps) = 55  
Alignment score = 0.636364  
AAAAAGagCAAGAaccTGcCGACcAAAGctCGTGacaTCGACATGAaCAGaGcGA

>Bacillus\_Fam\_429\_55\_2 Nr. of seq. 2 Alignment length(with gaps) = 55  
Alignment score = 0.660606  
CCCTTATGCaGaGgAAAagGTCacCTATAAGGGTACAATTAgAGAGcGAATCaTA

>Bacillus\_Fam\_430\_55\_2 Nr. of seq. 2 Alignment length(with gaps) = 55  
Alignment score = 0.660606  
ATTGGTGACCTTTCTTCaaCtTTCaCcACcTAcATAGGGCACCAATcAaCctcC

>Bacillus\_Fam\_431\_54\_2 Nr. of seq. 2 Alignment length(with gaps) = 54  
Alignment score = 0.669753  
gCGCGGTGCagaAAAGAGGAGaAAaGAAGaGAGAAcAGCaCCGCGCGaGccGaG

>Bacillus\_Fam\_432\_54\_2 Nr. of seq. 2 Alignment length(with gaps) = 54  
Alignment score = 0.743827  
aATGAAGACAcCTCTCaCTCctAaTTTCACCTCACgcACGTCTTCATACCgTCg

>Bacillus\_Fam\_433\_54\_2 Nr. of seq. 2 Alignment length(with gaps) = 54  
Alignment score = 0.629630  
GGtaAACATTGTCTCGTAGGaGTGtcAATGAaGCCcTcaaCCGaTGaAAAAGa

>Bacillus\_Fam\_434\_54\_2 Nr. of seq. 2 Alignment length(with gaps) = 54  
Alignment score = 0.771605  
TCTTACCTTCACACTaTTTTTTaTTcGCTCAAGGGCAGATGGcaGACTgCgCCA

>Bacillus\_Fam\_435\_54\_2 Nr. of seq. 2 Alignment length(with gaps) = 54  
Alignment score = 0.654321  
TTTCCTTTCTaAcGCaCgTTTCaTCcTcAGAAAGGAATaCTAgACTCcTcTcGC

>Bacillus\_Fam\_436\_54\_2 Nr. of seq. 2 Alignment length(with gaps) = 54  
Alignment score = 0.617284  
TTCATGaAGaCCAAAAagAaaGTGGAaaTcaAGaTTAGGGTGTCTCATGAaAGc

>Bacillus\_Fam\_437\_54\_2 Nr. of seq. 2 Alignment length(with gaps) = 54  
Alignment score = 0.635802  
gTTaGACCCgGTGGAATccaAgAAAaAGAGaAATCGaCCGgGTTAAAgAGGtTG

```

>Bacillus_Fam_438_54_2 Nr. of seq. 2 Alignment length(with gaps) = 54
Alignment score = 0.635802
AAAAAGtaccCAGnCGGTaACTgAAACaAGtGAAGTAGTGACCAAAGAGaGtGa
>Bacillus_Fam_439_54_2 Nr. of seq. 2 Alignment length(with gaps) = 54
Alignment score = 0.611111
TGTCCGAATCaCAcCTAcTaTTCaGACTCcacCTTcGcTTTTcCGCtCaACaTC
>Bacillus_Fam_440_54_2 Nr. of seq. 2 Alignment length(with gaps) = 54
Alignment score = 0.660494
TTTcCTGTCCGAACtGgGcCTcAGTTCGGACaCaAtTTTAGCagTTgCTGcGga
>Bacillus_Fam_441_54_2 Nr. of seq. 2 Alignment length(with gaps) = 54
Alignment score = 0.626543
AGaAAATagCaGGccGGAATGGCGTTCATagGGgaaATGAAAGCcATcTTGaGa
>Bacillus_Fam_442_54_2 Nr. of seq. 2 Alignment length(with gaps) = 54
Alignment score = 0.617284
GCGTTCATCCCCcCTtATGAACGcCATcaCaatTCAAnTTTTcCATcCtGgGATa
>Bacillus_Fam_443_54_2 Nr. of seq. 2 Alignment length(with gaps) = 54
Alignment score = 0.641975
AGGTAACAGAGAGaaCTcCTCAGTGaCCGTaaGCACGaAAAacAAAaggAGcAAA
>Bacillus_Fam_444_54_2 Nr. of seq. 2 Alignment length(with gaps) = 54
Alignment score = 0.654321
aAcTTTCGGACAGaTTGcGGACCCcaaTagaTCAAAAGCTGTCCGAACTCAGAgC
>Bacillus_Fam_445_54_2 Nr. of seq. 2 Alignment length(with gaps) = 54
Alignment score = 0.694444
AAAAAAGaaGGAGaCGGgCACTgTaGAGaGGTTCaGAGTGCCCGTgGaAGCTGa
>Bacillus_Fam_446_54_2 Nr. of seq. 2 Alignment length(with gaps) = 54
Alignment score = 0.604938
TaGACCCCTTCAGaTcTaTgcTGGTcTgCccTGAAGaGTCATATGcgaTCCcGTT
>Bacillus_Fam_447_54_2 Nr. of seq. 2 Alignment length(with gaps) = 54
Alignment score = 0.629630
GTCTATGAaCCCaAAAAAtAaCaGAAAccCCGcAAAAAgCGGTcCtATAGAAaTc
>Bacillus_Fam_448_54_2 Nr. of seq. 2 Alignment length(with gaps) = 54
Alignment score = 0.620370
TTgGGTTCCTTcaAacGgaaAAAAGcTGAGTTcgaGGGAATCAAAAGaGAGTc
>Bacillus_Fam_449_54_2 Nr. of seq. 2 Alignment length(with gaps) = 54
Alignment score = 0.654321
TAaTCcTCTcTCAagCTCTcTTTTcGGGcgaCCAaCCTTCcTCTTTGaCTACCG
>Bacillus_Fam_450_54_2 Nr. of seq. 2 Alignment length(with gaps) = 54
Alignment score = 0.654321
GGGgGACTTCGGACAAATTgaaGcCTCtTCCagCaGaTgcTTTGTCCGAACCTG
>Bacillus_Fam_451_54_2 Nr. of seq. 2 Alignment length(with gaps) = 54
Alignment score = 0.669753
tGGAAATGTCTGAAGTAGCCcCAGGTTCaGCCAAAAcAaCgtCAcTaGgaaCGa
>Bacillus_Fam_452_54_2 Nr. of seq. 2 Alignment length(with gaps) = 54
Alignment score = 0.611111
AAAaACCAGaAAcTaGGgAAAacAGgaCACCAATaaAGCCGtATTGGaGCaCgA
>Bacillus_Fam_453_54_2 Nr. of seq. 2 Alignment length(with gaps) = 54
Alignment score = 0.648148
aTCAGtGACCacTTTTcGGAGcgGGcCgGCTCATTTTGGGcACTGACAGCccaT
>Bacillus_Fam_454_54_2 Nr. of seq. 2 Alignment length(with gaps) = 54
Alignment score = 0.663580
TGTCAGTGCCcGTTTTTTCgaGtGaGGAgcGagTTTTGGGTACTGAGGgGaGTc
>Bacillus_Fam_455_54_2 Nr. of seq. 2 Alignment length(with gaps) = 54
Alignment score = 0.617284
aaCCAAAAccAAcTGaGcGAGCAcAggAAAAAGGTCATCATAAaGcCGATGAa

```

>Bacillus\_Fam\_456\_54\_2 Nr. of seq. 2 Alignment length(with gaps) = 54  
Alignment score = 0.604938  
GGTAACCAaAGGnAAGCaTaTGaTGCCCGTaAAcGagGAAAAAtAGtcGaTCaAC

>Bacillus\_Fam\_457\_54\_2 Nr. of seq. 2 Alignment length(with gaps) = 54  
Alignment score = 0.632716  
TCTTGTTACCGcGAACaCaCTcTTTTCTaCTTTCagGGGcACATGacaCaTCac

>Bacillus\_Fam\_458\_54\_2 Nr. of seq. 2 Alignment length(with gaps) = 54  
Alignment score = 0.635802  
TGTCCCTTCATAGacGgTaATGAAGGACAAaTTCGaAaaAAAgaATAaGcAaaGa

>Bacillus\_Fam\_459\_54\_2 Nr. of seq. 2 Alignment length(with gaps) = 54  
Alignment score = 0.722222  
CTcTATGTTACCGTaaACcgCtTTTTTCTTcgCTcCACGGTCACTTAgaAAGCCT

>Bacillus\_Fam\_460\_54\_2 Nr. of seq. 2 Alignment length(with gaps) = 54  
Alignment score = 0.608025  
tGgCCTTCATTCCaCTgATGAAGGACaaTTTTCaCaCGAgcCACAACCaTggTa

>Bacillus\_Fam\_461\_54\_2 Nr. of seq. 2 Alignment length(with gaps) = 54  
Alignment score = 0.617284  
TgCTCTCaTTTTcGGcTTTCATCAaccTcaTGaACACCAcCTTTCcCTTCC

>Bacillus\_Fam\_462\_54\_2 Nr. of seq. 2 Alignment length(with gaps) = 54  
Alignment score = 0.608025  
aACGTTCTTCATCaGGaggATGAAAGACGTTAcGGaGcGataTaaTGAttGaA

>Bacillus\_Fam\_463\_54\_2 Nr. of seq. 2 Alignment length(with gaps) = 54  
Alignment score = 0.709877  
aTCGAAGTAGAcAGtacTCTACTTCAACaTTCaaGcTCtAAAATCCAGGGAAAC

>Bacillus\_Fam\_464\_54\_2 Nr. of seq. 2 Alignment length(with gaps) = 54  
Alignment score = 0.682099  
TTTTTTCCgGgCcaCGGGCACTATGAACCTcTTATAGTGCCCatGaaCGtcTCT

>Bacillus\_Fam\_465\_54\_2 Nr. of seq. 2 Alignment length(with gaps) = 54  
Alignment score = 0.604938  
TGCTGTCTgaAAAGtcaAAAATccAaTaTAGAGAgCAAGTAGAAaccCgCTAGc

>Bacillus\_Fam\_466\_54\_2 Nr. of seq. 2 Alignment length(with gaps) = 54  
Alignment score = 0.703704  
cTATAGGCGACCGAGAGaGCGaGaAAAAAAGaGAggAcGGGTAGCGTAgAAGGa

>Bacillus\_Fam\_467\_54\_2 Nr. of seq. 2 Alignment length(with gaps) = 54  
Alignment score = 0.697531  
gtTccAATTTTaaCTaaAGTATTGTcGcCAATAcCcGCcATTGGAAACACTTTG

>Bacillus\_Fam\_468\_54\_2 Nr. of seq. 2 Alignment length(with gaps) = 54  
Alignment score = 0.611111  
ATCGCCCGTTCGccGcccAAAGnTacAgCAGAAGGTaGAAgAGAAGcGTgcCTC

>Bacillus\_Fam\_469\_54\_2 Nr. of seq. 2 Alignment length(with gaps) = 54  
Alignment score = 0.623457  
AaAGTCCaTCATaaGgTGATGATGGACAAAACGcGGTcaGAAaAaCggAAAagc

>Bacillus\_Fam\_470\_54\_2 Nr. of seq. 2 Alignment length(with gaps) = 54  
Alignment score = 0.679012  
GGAGGaAccAaTCCGTGTccAGGGTAACCAAAGaACGTGaTAGATTaCCCTaaa

>Bacillus\_Fam\_471\_54\_2 Nr. of seq. 2 Alignment length(with gaps) = 54  
Alignment score = 0.604938  
GTTTTGTCTaATAgGAgCGCTTcCTATcaGACAACTaacCTCcCaGaCCaCCT

>Bacillus\_Fam\_472\_54\_2 Nr. of seq. 2 Alignment length(with gaps) = 54  
Alignment score = 0.666667  
GCcGCTTCTCAaggCTacTTTCGAaCAGATTAGCTcCTaTTCgTTaACGTaCA

>Bacillus\_Fam\_473\_54\_2 Nr. of seq. 2 Alignment length(with gaps) = 54  
Alignment score = 0.654321  
TcGAAAAaaAGcTAAaCGacCCAaCGAGAAaGGGAAACCaAGcGGATGTaGGtG

```

>Bacillus_Fam_474_54_2 Nr. of seq. 2 Alignment length(with gaps) = 54
Alignment score = 0.635802
TGaAATGATGTaCCGCGcCTGaCtGaGCGCATGaCATCATTaTGaaaTTCcTga
>Bacillus_Fam_475_54_2 Nr. of seq. 2 Alignment length(with gaps) = 54
Alignment score = 0.709877
ATGTTGGTCTGaTTAGGAgcTaaTCAGgCCAaTGAGAcTCAATaTTCgAAGGaG
>Bacillus_Fam_476_54_2 Nr. of seq. 2 Alignment length(with gaps) = 54
Alignment score = 0.827160
TTATCGGCgTGATTAGAACCACCAAgGGAaAGGaAGAAGCATGCTTGAGGGTAc
>Bacillus_Fam_477_54_2 Nr. of seq. 2 Alignment length(with gaps) = 54
Alignment score = 0.913580
GACTTGTGGCACCACCTAGGCGGAGTGAcACCACCTTTTCACTCTTCCAnCCAcCG
>Bacillus_Fam_478_54_2 Nr. of seq. 2 Alignment length(with gaps) = 54
Alignment score = 0.669753
aTGAAGGACAAAacgAAGcAAGAGAAaGAtAaaAAgTGTCTTCaCaAAGGgTa
>Bacillus_Fam_479_54_2 Nr. of seq. 2 Alignment length(with gaps) = 54
Alignment score = 0.657407
caaTTTGaAGGTcCACcATATaCCAaTAATTAGGAGAATaGTGCCaCTCcAatt
>Bacillus_Fam_480_54_2 Nr. of seq. 2 Alignment length(with gaps) = 54
Alignment score = 0.790123
TCATAGTGaCCaTCCGAGaAGGAAAcCAGGTGAGaaCGGTCACTATgaAAGAGC
>Bacillus_Fam_481_54_2 Nr. of seq. 2 Alignment length(with gaps) = 54
Alignment score = 0.882716
TATAACAAATaTAGTAGCaGaACGAGGAATCGTaTCCcCAGCACCAGTAAATAG
>Bacillus_Fam_482_53_2 Nr. of seq. 2 Alignment length(with gaps) = 53
Alignment score = 0.672956
AGGACgATaAAAAaAGcAAAAgcaAAATTAAAGTaCTATAgAaAGGTTTcTAA
>Bacillus_Fam_483_53_2 Nr. of seq. 2 Alignment length(with gaps) = 53
Alignment score = 0.676101
aaACcCCAAaTTATCGTCCTTTaAAAcGGCtTCTATAaGACaTTAATcTaCTc
>Bacillus_Fam_484_53_2 Nr. of seq. 2 Alignment length(with gaps) = 53
Alignment score = 0.625786
tTCATTACcTATcCcTgacTATTTCGCACCTTAATTTgGCACgTTCgCCgTggT
>Bacillus_Fam_485_53_2 Nr. of seq. 2 Alignment length(with gaps) = 53
Alignment score = 0.685535
TgTTTTGTCCAATAGACCGCccCTATCGaACAAaTTCtTTTCCcaAaACacGCT
>Bacillus_Fam_486_53_2 Nr. of seq. 2 Alignment length(with gaps) = 53
Alignment score = 0.635220
AAAAaGGAGaaaCaGAAAAATaGGTAGTTAAGccAgGCgTTTAaAACgCCCCGA
>Bacillus_Fam_487_53_2 Nr. of seq. 2 Alignment length(with gaps) = 53
Alignment score = 0.679245
TGAAGGACaTTTTaAcGtGccCcTgGCTCgCGcTTTGTCTTCATTaaCCCCGA
>Bacillus_Fam_488_53_2 Nr. of seq. 2 Alignment length(with gaps) = 53
Alignment score = 0.613208
cTTCTTAACGTAGaACCaCTCTATGTgAAcaTAtcACcGcAgATTTcagCTg
>Bacillus_Fam_489_53_2 Nr. of seq. 2 Alignment length(with gaps) = 53
Alignment score = 0.628931
AaTGTCTTTTACAACGGcTCAAAAaGACAAAAGcGgTcCAccTTgCCgaccGA
>Bacillus_Fam_490_53_2 Nr. of seq. 2 Alignment length(with gaps) = 53
Alignment score = 0.622642
GtcAGAGAGGTCTTcATaGCacTTATGAaGACaTCaGtTTGGaGAGAAAgGac
>Bacillus_Fam_491_53_2 Nr. of seq. 2 Alignment length(with gaps) = 53
Alignment score = 0.672956
TCTCTGTTACCGtaaCcCcacTGTTgcTCGGcGcTTCGGGCTTTGAGAcGCCC

```

>Bacillus\_Fam\_492\_53\_2 Nr. of seq. 2 Alignment length(with gaps) = 53  
Alignment score = 0.638365  
TTCGGTCaaATAGAAGGGCTCTATAaGCCcaAAGaGcAAcTgAgAcccGGAGc

>Bacillus\_Fam\_493\_53\_2 Nr. of seq. 2 Alignment length(with gaps) = 53  
Alignment score = 0.660377  
ATGAAGACATCaGTaGcgcTaAaaACaGcTaGAGAGAGGTCTTGAGAAGaGgA

>Bacillus\_Fam\_494\_53\_2 Nr. of seq. 2 Alignment length(with gaps) = 53  
Alignment score = 0.660377  
AGcgaATGAAGACATcAGTGaAcCaGGAAaCtGAGtgAGAGAAgTCTTCATGa

>Bacillus\_Fam\_495\_53\_2 Nr. of seq. 2 Alignment length(with gaps) = 53  
Alignment score = 0.647799  
aGGTcCTCATAAGgcTgATGAAGACaTGAGtTGGTTgGaATaTTaTgCGAaAG

>Bacillus\_Fam\_496\_53\_2 Nr. of seq. 2 Alignment length(with gaps) = 53  
Alignment score = 0.713836  
GCTAaTTTAaTTTGCTGCCCTTTCTTATGCTgTTcCcaaCTTacAATgGGCTc

>Bacillus\_Fam\_497\_53\_2 Nr. of seq. 2 Alignment length(with gaps) = 53  
Alignment score = 0.698113  
TTCATCgGGCTcTATGATagaCATTTcGAGCCaaAaTTTTGcCTGTGATaGCG

>Bacillus\_Fam\_498\_53\_2 Nr. of seq. 2 Alignment length(with gaps) = 53  
Alignment score = 0.672956  
CCACTTTTcCCTccTaCTgACgGaTTTTcTGGCTTTTCATCccCTccATGAACA

>Bacillus\_Fam\_499\_53\_2 Nr. of seq. 2 Alignment length(with gaps) = 53  
Alignment score = 0.622642  
CGaGaAcGcAaGAAAAAGagAAAAaaCGGTAAcTAGTaGAGGCGaCTAaTGCC

>Bacillus\_Fam\_500\_53\_2 Nr. of seq. 2 Alignment length(with gaps) = 53  
Alignment score = 0.823899  
GTCACGTAGAGcCTGTCTACGTTACCCaaATCcAGcTCtTTTCAATGTTTaCG

>Bacillus\_Fam\_501\_53\_2 Nr. of seq. 2 Alignment length(with gaps) = 53  
Alignment score = 0.757862  
AATAGAACCATCAAAaCCGaaAATcAaaAGCTTGATGGCNCTAAaCAGGCnGt

>Bacillus\_Fam\_502\_53\_2 Nr. of seq. 2 Alignment length(with gaps) = 53  
Alignment score = 0.710692  
TCTATGAgCCCaAAAaTCaaGTGnAAaGAgCAAAAATgGGTTcATAGAaCGAA

>Bacillus\_Fam\_503\_53\_2 Nr. of seq. 2 Alignment length(with gaps) = 53  
Alignment score = 0.672956  
TGACAGcTTTgATGaTGaatGAGaCAAAGCTGTCATGATTaCaCaGTTATTc

>Bacillus\_Fam\_504\_53\_2 Nr. of seq. 2 Alignment length(with gaps) = 53  
Alignment score = 0.679245  
gCggaaTCTTGACAGCTTTGGCCCCGgATCCagaAAAcCTGTcACAAaAACTa

>Bacillus\_Fam\_505\_53\_2 Nr. of seq. 2 Alignment length(with gaps) = 53  
Alignment score = 0.723270  
ATGACGGACACTTTTTcCTCAAtTaTCGcaaTTTCTGTCCGTCATCacGgcT

>Bacillus\_Fam\_506\_53\_2 Nr. of seq. 2 Alignment length(with gaps) = 53  
Alignment score = 0.622642  
GACAgATccTTaGGATacTgTCCcCTGTTTGgCCGATAGAcCCCTTCTAacG

>Bacillus\_Fam\_507\_53\_2 Nr. of seq. 2 Alignment length(with gaps) = 53  
Alignment score = 0.610063  
aAAaCaGGGaACCAATACAGCtTATTGacGACCTaAaTcCTCcaAAATaCGa

>Bacillus\_Fam\_508\_53\_2 Nr. of seq. 2 Alignment length(with gaps) = 53  
Alignment score = 0.915094  
TCTCAGTGCCCGAAATGTCTCCTGCCACTACAAAcAGGgCACTGACAcCTCct

>Bacillus\_Fam\_509\_53\_2 Nr. of seq. 2 Alignment length(with gaps) = 53  
Alignment score = 0.628931  
TGTCCGAAGAGAGaGcAacTTTCGACAgGAAAacCGGaacAAgAGCgAaAAGc

>Bacillus\_Fam\_510\_53\_2 Nr. of seq. 2 Alignment length(with gaps) = 53  
Alignment score = 0.622642  
AGTTCGGACAAGAtaTcAcggGAAGAAGCacAAAGcaGTCCGAAGaaGGCaCA

>Bacillus\_Fam\_511\_53\_2 Nr. of seq. 2 Alignment length(with gaps) = 53  
Alignment score = 0.650943  
aAaAGGTCaTCATCAAGcTaATGAAGAcCCGAAAGCAtcTccAaaGCaaAGAA

>Bacillus\_Fam\_512\_53\_2 Nr. of seq. 2 Alignment length(with gaps) = 53  
Alignment score = 0.628931  
GACTTCaGACaaTcgTTCAGcCTTTTCCTaTcacACCTGTCTGAACTcGGaTc

>Bacillus\_Fam\_513\_53\_2 Nr. of seq. 2 Alignment length(with gaps) = 53  
Alignment score = 0.716981  
GTCCTTCATCCctCCGATGAACGACATCTcaaGcTtTTTCCTcTcGcCcgTTTT

>Bacillus\_Fam\_514\_53\_2 Nr. of seq. 2 Alignment length(with gaps) = 53  
Alignment score = 0.663522  
gTTCtTcTCATCTTCCCGCATCcCTCgGaTTTCGAGCAcTTCGCCcacgGaTCcC

>Bacillus\_Fam\_515\_53\_2 Nr. of seq. 2 Alignment length(with gaps) = 53  
Alignment score = 0.613208  
CTCCTcATCTTCCCGcATCCgATccTTGCGGGaAcTTCaGacGGnGaTcTCTt

>Bacillus\_Fam\_516\_53\_2 Nr. of seq. 2 Alignment length(with gaps) = 53  
Alignment score = 0.622642  
CGAATcGGaTGGATaCGGGAACTTGagAGcAaGAaAcccGaAGtcGAAGTGCC

>Bacillus\_Fam\_517\_53\_2 Nr. of seq. 2 Alignment length(with gaps) = 53  
Alignment score = 0.647799  
AcTAGTGGAATcaGTGAACTAAacgagCaTTTAGaACATatGtAaTTCCAGAA

>Bacillus\_Fam\_518\_53\_2 Nr. of seq. 2 Alignment length(with gaps) = 53  
Alignment score = 0.710692  
TGTCCCTCATAAgGcAGATGAAGGACATTTaTcTTGGtAAAAaCAagaGaGATT

>Bacillus\_Fam\_519\_53\_2 Nr. of seq. 2 Alignment length(with gaps) = 53  
Alignment score = 0.672956  
GTAACGTAGAGCcCGTCTACGTGCCCCGAacaGAtGgAtaaTTTaGCaGTaAGG

>Bacillus\_Fam\_520\_53\_2 Nr. of seq. 2 Alignment length(with gaps) = 53  
Alignment score = 0.874214  
TTCCTGAAATCTGTGGCTTCCgCTnCTTTTCGGGAATGACTCGCCTTGGGgcA

>Bacillus\_Fam\_521\_53\_2 Nr. of seq. 2 Alignment length(with gaps) = 53  
Alignment score = 0.773585  
CTGTATGACACGCAaAATCaTGtTCCaTTaGaATgTTCGCGTcTCATTCGTG

>Bacillus\_Fam\_522\_53\_2 Nr. of seq. 2 Alignment length(with gaps) = 53  
Alignment score = 0.672956  
GGTAACTATGaAaGCGtTCATAGTGACCAaAccccAAagAGAAAAAGCaAaAaC

>Bacillus\_Fam\_523\_53\_2 Nr. of seq. 2 Alignment length(with gaps) = 53  
Alignment score = 0.751572  
TGTCCCTCAAGaAGgGcTTATGAGGACAAACTcGaGTccGAAGCGTaGgCGAAn

>Bacillus\_Fam\_524\_53\_2 Nr. of seq. 2 Alignment length(with gaps) = 53  
Alignment score = 0.855346  
AGGTCATCATGGAGGTGATGAAGACTCtGAAGCgGTGTTGcTTGGaaGgGAAG

>Bacillus\_Fam\_525\_53\_2 Nr. of seq. 2 Alignment length(with gaps) = 53  
Alignment score = 1.000000  
CTCTCTTGAGTGACTCATATCGGTTCTCTGAGGCACTCTGGGGCGGGGGTCT

>Bacillus\_Fam\_526\_53\_2 Nr. of seq. 2 Alignment length(with gaps) = 53  
Alignment score = 0.974843  
GTACAGAGTGCCTCAAACGAAGTCTATGAAGCACTCTAaAGATGGAAAGGAGC

>Bacillus\_Fam\_527\_53\_2 Nr. of seq. 2 Alignment length(with gaps) = 53  
Alignment score = 0.943396  
CATGTATCCAGTAGCTTTTTTCGGGATACATGACACCNCNTTTTTTTNCTCGGT

>Bacillus\_Fam\_528\_53\_2 Nr. of seq. 2 Alignment length(with gaps) = 53  
Alignment score = 0.654088  
AATGAcacCCCCGCGCGgcCGaAGCGCATGtCaTCATTgTGAacaTTaaGAgGA

>Bacillus\_Fam\_529\_53\_2 Nr. of seq. 2 Alignment length(with gaps) = 53  
Alignment score = 0.622642  
CTTATGACTTTTCccaCcTAAaGTCgGAagCTaGTTgcCcgCtCCCCGCTCTTTc

>Bacillus\_Fam\_530\_53\_2 Nr. of seq. 2 Alignment length(with gaps) = 53  
Alignment score = 0.930818  
AAATAGCATAAGATAAGCAaGGAATCGTACGCTATAATCTcaAGCCAGTGTAC

>Bacillus\_Fam\_531\_53\_2 Nr. of seq. 2 Alignment length(with gaps) = 53  
Alignment score = 0.811321  
TGGTTCTAAAcCGaGTTAATAGTGCCATCAAAGGaggGGGaTTGGgAGcTTGA

>Bacillus\_Fam\_532\_53\_2 Nr. of seq. 2 Alignment length(with gaps) = 53  
Alignment score = 0.880503  
TGtTGCCACTTTTaCTTCACcCATGaAGCCTGTTTGTGGCGCAACTCACCGGAg

>Bacillus\_Fam\_533\_53\_2 Nr. of seq. 2 Alignment length(with gaps) = 53  
Alignment score = 0.628931  
GCGGTACAcGCTcGcaAaAAATcCGCcaaAGCGTGTACCGcaAGACcactCTa

>Bacillus\_Fam\_534\_52\_2 Nr. of seq. 2 Alignment length(with gaps) = 52  
Alignment score = 0.826923  
CAAAAGGACAATTcCaGGNAGAAaACAAAGaGCAAAcTGTcCTTTAgAGnGGTT

>Bacillus\_Fam\_535\_52\_2 Nr. of seq. 2 Alignment length(with gaps) = 52  
Alignment score = 0.743590  
TTTTcATTACCTATTATgaaGcTaTaCGCACCCCTAAcCTTGGCTTTGCTaGa

>Bacillus\_Fam\_536\_52\_2 Nr. of seq. 2 Alignment length(with gaps) = 52  
Alignment score = 0.602564  
GTAATGAAATtactCGacTcaCcTGATTTTTCAgTaCcTATTACTCctgATTG

>Bacillus\_Fam\_537\_52\_2 Nr. of seq. 2 Alignment length(with gaps) = 52  
Alignment score = 0.641026  
TCaCAAAAtTCGCTgaaaaaTCCgTTTTGCTGATaATAAAaCcGATTTACcA

>Bacillus\_Fam\_538\_52\_2 Nr. of seq. 2 Alignment length(with gaps) = 52  
Alignment score = 0.692308  
ccAAGAAGcGTTCAaaACGCCCGaaATTTcaAAAAGAAgGAAAAATcGGTAG

>Bacillus\_Fam\_539\_52\_2 Nr. of seq. 2 Alignment length(with gaps) = 52  
Alignment score = 0.698718  
ACTTTTcCTagTGAaCTAcTCgATTTTGTCcTTCATcAGCnCgcATGAAAG

>Bacillus\_Fam\_540\_52\_2 Nr. of seq. 2 Alignment length(with gaps) = 52  
Alignment score = 1.000000  
AGAGGGTGTTAGTGGTAGCGACTAAAGCCGTCTAAGAGAGATTTTGCTAAAC

>Bacillus\_Fam\_541\_52\_2 Nr. of seq. 2 Alignment length(with gaps) = 52  
Alignment score = 1.000000  
AGCCACTATTTTCATTTTTCTTCAGGATAGTGGTCCCAGCTCCTGTGGCTGG

>Bacillus\_Fam\_542\_52\_2 Nr. of seq. 2 Alignment length(with gaps) = 52  
Alignment score = 1.000000  
GAACCGCTATTTTAGCTTTTACACAGAAATAGTGGTCCCAGCGAGCGTGGCTA

>Bacillus\_Fam\_543\_52\_2 Nr. of seq. 2 Alignment length(with gaps) = 52  
Alignment score = 1.000000  
GTCACTCTAACCAAGAACATAGAATCAGAGTGCCTCAAAAAGAGGATATGA

>Bacillus\_Fam\_544\_52\_2 Nr. of seq. 2 Alignment length(with gaps) = 52  
Alignment score = 1.000000  
AAATCAGAGGGCCTCAAACGAGCGAAATGGAACCCCTCTAAACTGAAATAATC

>Bacillus\_Fam\_545\_52\_2 Nr. of seq. 2 Alignment length(with gaps) = 52  
Alignment score = 0.820513  
aCTCTaTTTCGGACAGAGTTcCTTGTTcAaTATTCAACTCTGTCCgATTGCa



>Bacillus\_Fam\_546\_52\_2 Nr. of seq. 2 Alignment length(with gaps) = 52  
Alignment score = 0.801282  
AAGGgCAgCATACGAAGcCTATGCcaCCCGAAAAAatGAAAcCGAGCAGATG

>Bacillus\_Fam\_547\_52\_2 Nr. of seq. 2 Alignment length(with gaps) = 52  
Alignment score = 0.878205  
CGCTATGATTACCGTCAACTCATTtTTGGGCTCgcTCTCGGGAAGCATAcAag

>Bacillus\_Fam\_548\_52\_2 Nr. of seq. 2 Alignment length(with gaps) = 52  
Alignment score = 0.955128  
GTTcAGACAGGAAGACGAGAAATAGcCTGTTTGTGTCCGAAGAAgGGGCGAG

>Bacillus\_Fam\_549\_52\_2 Nr. of seq. 2 Alignment length(with gaps) = 52  
Alignment score = 0.910256  
TGGGAGTTAAcCAAAGGGAATAAGcCGAAATCCCGAGAGCaAGCCAACAAAA

>Bacillus\_Fam\_550\_52\_2 Nr. of seq. 2 Alignment length(with gaps) = 52  
Alignment score = 0.974359  
GTCGCCATAAGAGGTTcATGACGACGAAAAATTGGAGGTCCAAGTAAAAACa

>Bacillus\_Fam\_551\_52\_2 Nr. of seq. 2 Alignment length(with gaps) = 52  
Alignment score = 0.923077  
TTCGGACTCAaCGAcCATCCGTTTCGCGGTTTTGaGTCCGAACACCAGTCAAC

>Bacillus\_Fam\_552\_52\_2 Nr. of seq. 2 Alignment length(with gaps) = 52  
Alignment score = 0.974359  
CATGAAATATGGGAGTTAATcCTAATCATTATCGACCAACAAGAGATGCCA

>Bacillus\_Fam\_553\_52\_2 Nr. of seq. 2 Alignment length(with gaps) = 52  
Alignment score = 0.948718  
CACCTTCGGACTCGCTCACGTTGATTTCTCCcTTTCTGTCCGAACCTcCTC

>Bacillus\_Fam\_554\_52\_2 Nr. of seq. 2 Alignment length(with gaps) = 52  
Alignment score = 0.897436  
TCCTCTTCATAAGCccCGTGAAGaGGAAACGTAAcCAAAAATCTCATTCcTTT

>Bacillus\_Fam\_555\_52\_2 Nr. of seq. 2 Alignment length(with gaps) = 52  
Alignment score = 0.820513  
TGAAGAGGATTACaAGCTTaaaTTCcTCCCaCTTTCCTCTTCATCTAGGCTa

>Bacillus\_Fam\_556\_52\_2 Nr. of seq. 2 Alignment length(with gaps) = 52  
Alignment score = 0.692308  
TGTcCcTcAATAAGGGCTaTTaAaGACAAAACCTCccCgGGAAAGCAagaAAAA

>Bacillus\_Fam\_557\_52\_2 Nr. of seq. 2 Alignment length(with gaps) = 52  
Alignment score = 0.628205  
ATTTCGGACTcaCTTactccTTTTaCaGCTcGacCTGTCCGAATaCCCCtCT

>Bacillus\_Fam\_558\_52\_2 Nr. of seq. 2 Alignment length(with gaps) = 52  
Alignment score = 0.641026  
GGCggtCATcCCCCtTATGAaCGACCaTaCCgATGTGTTTTaCaaTcgCaCG

>Bacillus\_Fam\_559\_52\_2 Nr. of seq. 2 Alignment length(with gaps) = 52  
Alignment score = 0.666667  
AATCAaACGGTCGaTCATccCCcTTATGAACGaCCaCGCCgGCTGAaaaTcc

>Bacillus\_Fam\_560\_52\_2 Nr. of seq. 2 Alignment length(with gaps) = 52  
Alignment score = 0.724359  
ATTAGTGACCGagaTaCGGGATTTacCcTAAATACGGGaaCCTTTTTaCcGCg

>Bacillus\_Fam\_561\_52\_2 Nr. of seq. 2 Alignment length(with gaps) = 52  
Alignment score = 0.615385  
TTAGTgACCGgTTTTCCaCTcaaACcCgTaTTCGGGCACcaTTaCcCgCGA

>Bacillus\_Fam\_562\_52\_2 Nr. of seq. 2 Alignment length(with gaps) = 52  
Alignment score = 0.910256  
CAGAAaATCAGaTTTGATGGCACTGAACATcGAGAATAGgACCACCAACGAA

>Bacillus\_Fam\_563\_52\_2 Nr. of seq. 2 Alignment length(with gaps) = 52  
Alignment score = 1.000000  
TGAAAAGTGTTCGTAACCCAGTTTAAGAACACTTTTCCGCAGAGCAGAAGGGT

>Bacillus\_Fam\_564\_52\_2 Nr. of seq. 2 Alignment length(with gaps) = 52  
Alignment score = 0.980769  
TGATGTGAAGGGTTATAAGTAAGTGAGAATTGACCCTTNAGTGCAGCCGTAG

>Bacillus\_Fam\_565\_52\_2 Nr. of seq. 2 Alignment length(with gaps) = 52  
Alignment score = 0.974359  
GTGAATGAACCCCTTCaTACGAAGAATCAGGAGCTGAAGGGTCAAAAGGCGTC

>Bacillus\_Fam\_566\_52\_2 Nr. of seq. 2 Alignment length(with gaps) = 52  
Alignment score = 1.000000  
CATGAAGGGTCATATCATGCTCGCTTATGACCACTCAGCTCACCTGCCCTG

>Bacillus\_Fam\_567\_52\_2 Nr. of seq. 2 Alignment length(with gaps) = 52  
Alignment score = 0.826923  
aAGGTTTAAGAGCACAACCGGTCTaCCCAGatAAGAGTTTGTGCTGCaAAC

>Bacillus\_Fam\_568\_52\_2 Nr. of seq. 2 Alignment length(with gaps) = 52  
Alignment score = 0.948718  
TCTTACCCTCCCAAACCGTTATTTCGATCTGACAGGGcAAGCAAACCTACgTT

>Bacillus\_Fam\_569\_52\_2 Nr. of seq. 2 Alignment length(with gaps) = 52  
Alignment score = 0.897436  
AAGTGTCTTAACCTGaGTTAGCAACACAAACTcTGTTGATcGTTCACTGGA

>Bacillus\_Fam\_570\_52\_2 Nr. of seq. 2 Alignment length(with gaps) = 52  
Alignment score = 0.794872  
TTGATGGTTCTTATAAGCCCCGATAAGTaCCAcCAAaCTCTGAgTcccTTGaA

>Bacillus\_Fam\_571\_52\_2 Nr. of seq. 2 Alignment length(with gaps) = 52  
Alignment score = 0.948718  
GAAGGTCACAAAACaGGAAGGAATGTGCCCTTCGTGAAGTGTTCaAGaTGT

>Bacillus\_Fam\_572\_52\_2 Nr. of seq. 2 Alignment length(with gaps) = 52  
Alignment score = 1.000000  
GGAAAGTGTTCTAAAAAGGGTTTAGCAACATTAACCCTGGCTGGAGAAGAGA

>Bacillus\_Fam\_573\_52\_2 Nr. of seq. 2 Alignment length(with gaps) = 52  
Alignment score = 1.000000  
TGAAAGGTCAATAAGCGGAAGGATAAGACCCTTTATCAAAGCTGGTCCGCCG

>Bacillus\_Fam\_574\_52\_2 Nr. of seq. 2 Alignment length(with gaps) = 52  
Alignment score = 0.641026  
CTTTGACTaCCGgTCTcgcgGCTTCCTCcaacTTTCGGGaGcCAaCCCCCTTC

>Bacillus\_Fam\_575\_52\_2 Nr. of seq. 2 Alignment length(with gaps) = 52  
Alignment score = 0.910256  
AATCTCCACATACTGGaAAATCgTAGTCCCAATaAGCCCTATTGGTGCTCCg

>Bacillus\_Fam\_576\_52\_2 Nr. of seq. 2 Alignment length(with gaps) = 52  
Alignment score = 0.974359  
GGGCCTCCATCaGGGCGATGGACGACCGTTTATTGCTCAATCTCAGGTTTCA

>Bacillus\_Fam\_577\_52\_2 Nr. of seq. 2 Alignment length(with gaps) = 52  
Alignment score = 0.730769  
TTTTTCTCcCacTcTGCcGATTTCCGGTACTGAcaCcaCCTGTCAGTaaCTC

>Bacillus\_Fam\_578\_52\_2 Nr. of seq. 2 Alignment length(with gaps) = 52  
Alignment score = 0.666667  
gATGAAGACCgGAACGAAGCTTGAGccaGaccaAAAAGGTaTTCATcaGGTT

>Bacillus\_Fam\_579\_52\_2 Nr. of seq. 2 Alignment length(with gaps) = 52  
Alignment score = 0.692308  
GCGaaTTCGGGACaTGAGaGcCCATCATGAaCCATcaaCaCGACTTTTcC

>Bacillus\_Fam\_580\_52\_2 Nr. of seq. 2 Alignment length(with gaps) = 52  
Alignment score = 0.705128  
GgCCCGTaGgtTCccTTTTTTGaCaCGAACGGGaCaTGATAAAGCgTCTCAT

>Bacillus\_Fam\_581\_52\_2 Nr. of seq. 2 Alignment length(with gaps) = 52  
Alignment score = 0.653846  
ATGAAGGaCAAGTgACAcCAAGAAaAaAaAaAaTGTCCTTCATcAaGTaa

```

>Bacillus_Fam_582_52_2 Nr. of seq. 2 Alignment length(with gaps) = 52
Alignment score = 0.801282
TGGgCTTTTGATaCCTTATAAAGACCATTcGGAacCGGATTCTTCCaCaaAT
>Bacillus_Fam_583_52_2 Nr. of seq. 2 Alignment length(with gaps) = 52
Alignment score = 0.775641
AGTTCCCGaaCCcAGGCAAAaTcCCCcTCCAGGGTAATtAATCGgTCACTTa
>Bacillus_Fam_584_52_2 Nr. of seq. 2 Alignment length(with gaps) = 52
Alignment score = 0.666667
TCAGTGCCCaTGcAGGGgaAAAAaaaAgGCccAcGGGCACTCAGaaAGGTTg
>Bacillus_Fam_585_52_2 Nr. of seq. 2 Alignment length(with gaps) = 52
Alignment score = 0.647436
aTGAGGACAagTTaaGCcCTTGCTcaacGAgTtTcTGTcCTCATGAACaCCcC
>Bacillus_Fam_586_52_2 Nr. of seq. 2 Alignment length(with gaps) = 52
Alignment score = 0.717949
CTATTGGACAAAACcCccTTATAAAcCaCccAaAaTGTCcAaTAGAcCCCTT
>Bacillus_Fam_587_52_2 Nr. of seq. 2 Alignment length(with gaps) = 52
Alignment score = 0.717949
aGTGCACATTGAAGccTTCAATGAACACGaGAGaAAGGaAaATCaaCaaAGA
>Bacillus_Fam_588_52_2 Nr. of seq. 2 Alignment length(with gaps) = 52
Alignment score = 0.621795
TTATTCCcCTGAAGaAGaaaaAAaGaaCcgTcTTCaGGTGAATAACCacaGT
>Bacillus_Fam_589_52_2 Nr. of seq. 2 Alignment length(with gaps) = 52
Alignment score = 0.641026
AaGaAAAAGTCCaTCATAGGGccAATGAaAGACAAAaccCAAccagCAaAGa
>Bacillus_Fam_590_52_2 Nr. of seq. 2 Alignment length(with gaps) = 52
Alignment score = 0.698718
ATGATGGACTTTTcccGCgTTcCCTcAaaCGcTTTTGTcCTTCaGaaCCTTg
>Bacillus_Fam_591_52_2 Nr. of seq. 2 Alignment length(with gaps) = 52
Alignment score = 0.769231
CTGGATTATAGAGGTGTGTTTCgCGCcgaATcGGGACaCcGaTTACCAAAaT
>Bacillus_Fam_592_52_2 Nr. of seq. 2 Alignment length(with gaps) = 52
Alignment score = 0.647436
GGagAAACGAGaCacAAaAGTCCAGTAaaTGGAAAAaAGaGTCGTGaaaACa
>Bacillus_Fam_593_52_2 Nr. of seq. 2 Alignment length(with gaps) = 52
Alignment score = 0.608974
TCATGAAGGACgTtTCcCaaGAcATaGcAcatCcAAaaGTCCTTCATCaCcC
>Bacillus_Fam_594_52_2 Nr. of seq. 2 Alignment length(with gaps) = 52
Alignment score = 0.974359
CACATTTTTCTGCATTTTCGCTCCATTATCTGTTTCAAAACCTCgAGTTGACG
>Bacillus_Fam_595_52_2 Nr. of seq. 2 Alignment length(with gaps) = 52
Alignment score = 0.929487
GGGCACCTTTCTCCCTCTTTTCGTTACCGGAAACCGcTTTTTCCTCTCgaGC
>Bacillus_Fam_596_52_2 Nr. of seq. 2 Alignment length(with gaps) = 52
Alignment score = 0.794872
CTTCAATGTgACCGTTTCTaTGATTTcAaTaaCgTTTTGGTCACATTGAGCc
>Bacillus_Fam_597_52_2 Nr. of seq. 2 Alignment length(with gaps) = 52
Alignment score = 0.955128
ATGAAGACCGTTAGTTTTGGTGAATGagCAAGAACCGGTTATCATAGTTGAG
>Bacillus_Fam_598_52_2 Nr. of seq. 2 Alignment length(with gaps) = 52
Alignment score = 1.000000
GGCTTTCATTCTTCTCATGATGACCTTTTCTCTAGCTCTCTAGAATGATTTC
>Bacillus_Fam_599_51_2 Nr. of seq. 2 Alignment length(with gaps) = 51
Alignment score = 0.712418
TTTCATTACCaaTcaCCagTTaTTCGTACCCTAATTaAGcCAACaCTCcAg

```

>Bacillus\_Fam\_600\_51\_2 Nr. of seq. 2 Alignment length(with gaps) = 51  
Alignment score = 0.895425  
TTCGGCTTATAATTCTTactCTCCATTCTTTTTACGCCGAActcgCTCTTA

>Bacillus\_Fam\_601\_51\_2 Nr. of seq. 2 Alignment length(with gaps) = 51  
Alignment score = 1.000000  
TTCTTGCTCTTCTCTAGCATCGTCCTCGCTGAGCTCTTCTGTACTGTCTTC

>Bacillus\_Fam\_602\_51\_2 Nr. of seq. 2 Alignment length(with gaps) = 51  
Alignment score = 1.000000  
AAAAGGAAAGCGCCAAAAGCCCGTTTGTGAACACGAAAATCGAAAAACAGG

>Bacillus\_Fam\_603\_48\_2 Nr. of seq. 2 Alignment length(with gaps) = 48  
Alignment score = 1.000000  
CAGATAGAGGAGGTTGAAGAACCGAGCAAACCTGAGGAGTCAGAAGAG

>Bacillus\_Fam\_604\_48\_2 Nr. of seq. 2 Alignment length(with gaps) = 48  
Alignment score = 0.951389  
TTGGATTATCCACTGCATTACTtTCTTCTTGaGAAACAGCACTATTAC

>Bacillus\_Fam\_605\_48\_2 Nr. of seq. 2 Alignment length(with gaps) = 48  
Alignment score = 0.694444  
TCTTTcGGcTCTTCcaTTGacCCATCacCAGGcTTTGTcCCaTCCTGA

>Bacillus\_Fam\_606\_47\_2 Nr. of seq. 2 Alignment length(with gaps) = 47  
Alignment score = 1.000000  
TCCGTGGACAGATGGGGTGAAGTGTCTTTTTGTGGTGCCAGGTACGC

>Bacillus\_Fam\_607\_46\_2 Nr. of seq. 2 Alignment length(with gaps) = 46  
Alignment score = 0.753623  
CCAGGTGAAGaGaGAATCTGGcCAaCCaGAaGAaGAAaTAACGGAG

>Bacillus\_Fam\_608\_45\_2 Nr. of seq. 2 Alignment length(with gaps) = 45  
Alignment score = 0.629630  
AATCCAACaACACCACCAAcgaCAaGTGaAGaaAAcAAcGGaGAa

>Bacillus\_Fam\_609\_45\_2 Nr. of seq. 2 Alignment length(with gaps) = 45  
Alignment score = 0.614815  
GGCATTTGaCCaTATCCcGCTGGcAcTTgCTGaCCAgAACCCagT

>Bacillus\_Fam\_610\_45\_2 Nr. of seq. 2 Alignment length(with gaps) = 45  
Alignment score = 0.874074  
GAAAAAGAAGCAGCAATgCAagaACAACAAAAACAAGATaAAAT

>Bacillus\_Fam\_611\_45\_2 Nr. of seq. 2 Alignment length(with gaps) = 45  
Alignment score = 0.822222  
GATTCCTCaTcGATTCaTAacCATCGCTaGACTCGTTATCTTCA

>Bacillus\_Fam\_612\_43\_2 Nr. of seq. 2 Alignment length(with gaps) = 43  
Alignment score = 0.837209  
GAAGCTaCCgGCTGAAGAAcCTGTAAACAGAGGaACCAGCAGAG

>Bacillus\_Fam\_613\_43\_2 Nr. of seq. 2 Alignment length(with gaps) = 43  
Alignment score = 0.689922  
CATGCgGAAGGTNaaanAcAACaGCAAGTgGGANATgCTTCN

>Bacillus\_Fam\_614\_43\_2 Nr. of seq. 2 Alignment length(with gaps) = 43  
Alignment score = 0.732558  
CCTTCCGCATGCGAgNcAacTCCACTGGCTATTGTaTtaANtn

>Bacillus\_Fam\_615\_43\_2 Nr. of seq. 2 Alignment length(with gaps) = 43  
Alignment score = 0.658915  
GcAGGAGCaATGGACGcCAAtATgCCaCAcATGCCGCAaGTa

>Bacillus\_Fam\_616\_42\_2 Nr. of seq. 2 Alignment length(with gaps) = 42  
Alignment score = 0.793651  
aGATTGTGACCAAGCGCGGcGnAAAcTcCGGaCAATTGGCGa

>Bacillus\_Fam\_617\_42\_2 Nr. of seq. 2 Alignment length(with gaps) = 42  
Alignment score = 0.690476  
AtTTCGtGATTTCGCGGCCaGAaCaAcaCTTTTCaTGCCGG

```

>Bacillus_Fam_618_42_2 Nr. of seq. 2 Alignment length(with gaps) = 42
Alignment score = 0.638889
tcCGaTCcCTATcCGTcGGTAAaCcCgTcATTCTGGTTAA
>Bacillus_Fam_619_42_2 Nr. of seq. 2 Alignment length(with gaps) = 42
Alignment score = 0.809524
GGaATaACTGGTCTACTGGaGTTACAGGacCTACCGGAATc
>Bacillus_Fam_620_42_2 Nr. of seq. 2 Alignment length(with gaps) = 42
Alignment score = 1.000000
CTTGCTTTCAATGATGAAATGCGCCATTTCCAAAAGGAGCAG
>Bacillus_Fam_621_42_2 Nr. of seq. 2 Alignment length(with gaps) = 42
Alignment score = 0.809524
GGATCaGGTTCcGCaTCCGGaACGACcGCAACGGGCAACACc
>Bacillus_Fam_622_42_2 Nr. of seq. 2 Alignment length(with gaps) = 42
Alignment score = 1.000000
TTTGATTCTGGTTGATCAGAAGTTTGATTCCATTGATCAGAGA
>Bacillus_Fam_623_42_2 Nr. of seq. 2 Alignment length(with gaps) = 42
Alignment score = 0.650794
AGaaGTAGTGGAaaCTCaAGaaGAAGAGAGACCaGTAcAgCa
>Bacillus_Fam_624_42_2 Nr. of seq. 2 Alignment length(with gaps) = 42
Alignment score = 0.690476
GGAGAAATGCCacaAGcctAcGGCCaAaTGCCaCAGGaTAC
>Bacillus_Fam_625_42_2 Nr. of seq. 2 Alignment length(with gaps) = 42
Alignment score = 0.730159
AaAcTCGTGGGTAAAgCaCCGaGTTATaTGGGTATTCCaCca
>Bacillus_Fam_626_42_2 Nr. of seq. 2 Alignment length(with gaps) = 42
Alignment score = 0.968254
CCAGGAGGCGGAACGGGAACAGAcAACGGAACCGGAGGAAAC
>Bacillus_Fam_627_42_2 Nr. of seq. 2 Alignment length(with gaps) = 42
Alignment score = 1.000000
GAAGTCGCGAAATTCGGTGGGAAGTTGAAAGATTAACGGGA
>Bacillus_Fam_628_41_2 Nr. of seq. 2 Alignment length(with gaps) = 41
Alignment score = 0.617886
TTCTTTTACTggAgcgGTTTTGttACAAaTTGGCTgtGGcGC
>Bacillus_Fam_629_41_2 Nr. of seq. 2 Alignment length(with gaps) = 41
Alignment score = 0.626016
GCgGATAAAaCaaAgAAAGTCGcGATATATcggAAAgTTa
>Bacillus_Fam_630_40_2 Nr. of seq. 2 Alignment length(with gaps) = 40
Alignment score = 0.754167
tGTTCaTCTGTTGGCTCTGTaacTTCTACTTCTTCaGtCT
>Bacillus_Fam_631_39_2 Nr. of seq. 2 Alignment length(with gaps) = 39
Alignment score = 0.897436
GGcTTCACTTCTGGcTCCTTCGGcTCTTTTCGGATCTTCC
>Bacillus_Fam_632_39_2 Nr. of seq. 2 Alignment length(with gaps) = 39
Alignment score = 0.897436
AATCCGGAACAAAaCCAGCAACTAAACCTGcTACTGAc
>Bacillus_Fam_633_39_2 Nr. of seq. 2 Alignment length(with gaps) = 39
Alignment score = 0.760684
TGaTCaTGcTCgTCccCATGAGCTTCTTCCTCATGCTCa
>Bacillus_Fam_634_39_2 Nr. of seq. 2 Alignment length(with gaps) = 39
Alignment score = 0.641026
ATGaCCATGATGGaAGCCaTaACCaGGGTaaTAaccgCC
>Bacillus_Fam_635_39_2 Nr. of seq. 2 Alignment length(with gaps) = 39
Alignment score = 0.794872
CATGcTCGTGATCATGATCTTCCTCATGccCGTcCTCac

```

>Bacillus\_Fam\_636\_39\_2 Nr. of seq. 2 Alignment length(with gaps) = 39  
Alignment score = 0.974359  
AGAAGAAGTTGTGGAATTAGAGAAAtCTGAGGAAGCGAC

>Bacillus\_Fam\_637\_39\_2 Nr. of seq. 2 Alignment length(with gaps) = 39  
Alignment score = 0.666667  
AAGaAaGAAGAAcaAGaaCGtTTAGCaGAaGAACAGCGa

>Bacillus\_Fam\_638\_39\_2 Nr. of seq. 2 Alignment length(with gaps) = 39  
Alignment score = 0.940171  
GCTCCCATCACTCCGGACGGCTGACCCATCGGGGATTGc

>Bacillus\_Fam\_639\_37\_2 Nr. of seq. 2 Alignment length(with gaps) = 37  
Alignment score = 0.662162  
TGtCCTGGaTAaCCTCCCATGCCaCCaTAaCCaCCca

>Bacillus\_Fam\_640\_37\_2 Nr. of seq. 2 Alignment length(with gaps) = 37  
Alignment score = 0.603604  
cACGGGAGCaACGGGAGcAACCGGGacCaAcCGGAGc

>Bacillus\_Fam\_641\_37\_2 Nr. of seq. 2 Alignment length(with gaps) = 37  
Alignment score = 0.747748  
TGCCACTGaTGCCAAgGTAccGTaaGGATGcTGCTGA

>Bacillus\_Fam\_642\_36\_2 Nr. of seq. 2 Alignment length(with gaps) = 36  
Alignment score = 0.666667  
ACcGGAGCaACaGGccCaACgGGAaTAACgGGCCCA

>Bacillus\_Fam\_643\_36\_2 Nr. of seq. 2 Alignment length(with gaps) = 36  
Alignment score = 0.898148  
AAAAGCAAGAAACCCGATGACTGCAAAAAaCCTGAC

>Bacillus\_Fam\_644\_36\_2 Nr. of seq. 2 Alignment length(with gaps) = 36  
Alignment score = 0.925926  
GAAATTAaACAGGAAAAAGATATAGGAATTAAaAAG

>Bacillus\_Fam\_645\_36\_2 Nr. of seq. 2 Alignment length(with gaps) = 36  
Alignment score = 0.925926  
TCTTTTGTAGCcTGTTcAGCTTGAGCcTGCTGCTGC

>Bacillus\_Fam\_646\_36\_2 Nr. of seq. 2 Alignment length(with gaps) = 36  
Alignment score = 1.000000  
GGTCCTTGAACCCCTTGTTGTGCCTTGATCTCCTTGC

>Bacillus\_Fam\_647\_36\_2 Nr. of seq. 2 Alignment length(with gaps) = 36  
Alignment score = 0.944444  
CAAGGATCAACTGNGCNCAGGGATCCCAAGGACCG

>Bacillus\_Fam\_648\_36\_2 Nr. of seq. 2 Alignment length(with gaps) = 36  
Alignment score = 0.666667  
GGaAATACAACgCCGCCAaaCAaTGGAaAaGGCcAA

>Bacillus\_Fam\_649\_36\_2 Nr. of seq. 2 Alignment length(with gaps) = 36  
Alignment score = 0.962963  
GCAACAACCGGAATAACGGaAACGGCCAGGCCGCAA

>Bacillus\_Fam\_650\_36\_2 Nr. of seq. 2 Alignment length(with gaps) = 36  
Alignment score = 0.703704  
CaTgGacTGCaGTgCCACCATTcGGaCCTTGaCCTC

>Bacillus\_Fam\_651\_36\_2 Nr. of seq. 2 Alignment length(with gaps) = 36  
Alignment score = 0.629630  
CGCCAGTAGCCcCCgGaAaaaCCaGTaGGaCCGGTAa

>Bacillus\_Fam\_652\_36\_2 Nr. of seq. 2 Alignment length(with gaps) = 36  
Alignment score = 0.666667  
GGacCgACAGGAGCAACAGGAaTAGaaGGaaTCACc

>Bacillus\_Fam\_653\_36\_2 Nr. of seq. 2 Alignment length(with gaps) = 36  
Alignment score = 0.824074  
AGTACAGCAAacGGAAGAAaGCAGCCGAGAGTAcC

>Bacillus\_Fam\_654\_34\_2 Nr. of seq. 2 Alignment length(with gaps) = 34  
 Alignment score = 1.000000  
 TCTGTCCCCCTTGGCCCAGTTTTCGGGCCAGGGGG

>Bacillus\_Fam\_655\_33\_2 Nr. of seq. 2 Alignment length(with gaps) = 33  
 Alignment score = 1.000000  
 CGGCGGGAATGCCGGAATGCCAGGTCAAGGAAG

>Bacillus\_Fam\_656\_30\_2 Nr. of seq. 2 Alignment length(with gaps) = 30  
 Alignment score = 1.000000  
 AAAATGAAAGAAACTCCAAATGTAGTACCG

>Bacillus\_Fam\_657\_28\_2 Nr. of seq. 2 Alignment length(with gaps) = 28  
 Alignment score = 0.601190  
 aGCCAAGCaaAAGCaACAAGAcAACAA

>Bacillus\_Fam\_658\_27\_2 Nr. of seq. 2 Alignment length(with gaps) = 27  
 Alignment score = 0.697531  
 tTGTAACCTGGTACATgGaGcGtTtGAT

>Bacillus\_Fam\_659\_27\_2 Nr. of seq. 2 Alignment length(with gaps) = 27  
 Alignment score = 0.654321  
 cCTccaGCTcccccaGgacCTccTGaa

>Bacillus\_Fam\_660\_24\_2 Nr. of seq. 2 Alignment length(with gaps) = 24  
 Alignment score = 0.631944  
 GgACAgGTAAAAcCAcAAAAAGaa

>Bacillus\_Fam\_661\_24\_2 Nr. of seq. 2 Alignment length(with gaps) = 24  
 Alignment score = 0.833333  
 ATGGCaGGAGCGAACATGGcGCCa

>Bacillus\_Fam\_662\_24\_2 Nr. of seq. 2 Alignment length(with gaps) = 24  
 Alignment score = 0.944444  
 CAGAAAAGAATCAAAAAaCAGAGA

>Bacillus\_Fam\_663\_23\_2 Nr. of seq. 2 Alignment length(with gaps) = 23  
 Alignment score = 0.666667  
 TATTTGCGTCGgTcCCAnaCnAT

>Bacillus\_Fam\_664\_23\_2 Nr. of seq. 2 Alignment length(with gaps) = 23  
 Alignment score = 0.717391  
 aTTAGGATCGTaaATTTCTGaGA

>Bacillus\_Fam\_665\_23\_2 Nr. of seq. 2 Alignment length(with gaps) = 23  
 Alignment score = 0.615942  
 cCAACTaGCGGATaAcCaCGaTC

>Bacillus\_Fam\_666\_23\_2 Nr. of seq. 2 Alignment length(with gaps) = 23  
 Alignment score = 0.760870  
 TTTATTTTCCATTcaAGCCGnAt

>Bacillus\_Fam\_667\_23\_2 Nr. of seq. 2 Alignment length(with gaps) = 23  
 Alignment score = 0.666667  
 ATTCCGCGAAAnAACcaAcaATA

>Bacillus\_Fam\_668\_22\_2 Nr. of seq. 2 Alignment length(with gaps) = 22  
 Alignment score = 0.772727  
 tTATATCAGCGaAACTCCaAAt

>Bacillus\_Fam\_669\_22\_2 Nr. of seq. 2 Alignment length(with gaps) = 22  
 Alignment score = 0.621212  
 aATTCCGgAACTTTTcGgaTTa

>Bacillus\_Fam\_670\_22\_2 Nr. of seq. 2 Alignment length(with gaps) = 22  
 Alignment score = 0.643939  
 cTaACTaTaAcATTTTTGGGTC

>Bacillus\_Fam\_671\_22\_2 Nr. of seq. 2 Alignment length(with gaps) = 22  
 Alignment score = 0.628788  
 aAAAAAGCATTAtGaTcAaGAc

>Bacillus\_Fam\_672\_22\_2 Nr. of seq. 2 Alignment length(with gaps) = 22  
 Alignment score = 0.628788  
 TATTCCCGTCTGaGaagGaaGt  
 >Bacillus\_Fam\_673\_22\_2 Nr. of seq. 2 Alignment length(with gaps) = 22  
 Alignment score = 0.681818  
 TTATTCCCGTCTCagaATaaGC  
 >Bacillus\_Fam\_674\_22\_2 Nr. of seq. 2 Alignment length(with gaps) = 22  
 Alignment score = 0.696970  
 TcCGACAGTAAaGcGTGGCtTA  
 >Bacillus\_Fam\_675\_22\_2 Nr. of seq. 2 Alignment length(with gaps) = 22  
 Alignment score = 0.674242  
 tAATTCCGGAACtTTTcaacCat  
 >Bacillus\_Fam\_676\_22\_2 Nr. of seq. 2 Alignment length(with gaps) = 22  
 Alignment score = 0.643939  
 cTTTATTGTCCgGAAacGCtCt  
 >Bacillus\_Fam\_677\_22\_2 Nr. of seq. 2 Alignment length(with gaps) = 22  
 Alignment score = 0.810606  
 TTCATTCCAAAAcTGGGNTTTt  
 >Bacillus\_Fam\_678\_22\_2 Nr. of seq. 2 Alignment length(with gaps) = 22  
 Alignment score = 0.810606  
 CTAACCTCGACTAAAGGcgGAGg  
 >Bacillus\_Fam\_679\_22\_2 Nr. of seq. 2 Alignment length(with gaps) = 22  
 Alignment score = 0.666667  
 TTTAAACAGGTTgGcAcGcgCG  
 >Bacillus\_Fam\_680\_22\_2 Nr. of seq. 2 Alignment length(with gaps) = 22  
 Alignment score = 0.674242  
 TTTAcgATCCAAaTTgAACCAa  
 >Bacillus\_Fam\_681\_22\_2 Nr. of seq. 2 Alignment length(with gaps) = 22  
 Alignment score = 0.848485  
 GGAATGATTATTcGcCGAATCC  
 >Bacillus\_Fam\_682\_22\_2 Nr. of seq. 2 Alignment length(with gaps) = 22  
 Alignment score = 0.628788  
 aCTTCTcccTTTGGaTCTgTCa  
 >Bacillus\_Fam\_683\_22\_2 Nr. of seq. 2 Alignment length(with gaps) = 22  
 Alignment score = 0.727273  
 ATTCTACAAAAaTcAAAGagGA  
 >Bacillus\_Fam\_684\_22\_2 Nr. of seq. 2 Alignment length(with gaps) = 22  
 Alignment score = 0.613636  
 GTTACTCCCGcATaGaCTcCac  
 >Bacillus\_Fam\_685\_22\_2 Nr. of seq. 2 Alignment length(with gaps) = 22  
 Alignment score = 0.727273  
 GCAAATAGAAaTggGaAAAtCG  
 >Bacillus\_Fam\_686\_22\_2 Nr. of seq. 2 Alignment length(with gaps) = 22  
 Alignment score = 0.674242  
 GATAATTCGACCgTCacGaGCc  
 >Bacillus\_Fam\_687\_22\_2 Nr. of seq. 2 Alignment length(with gaps) = 22  
 Alignment score = 0.613636  
 cTCTCGCGTTCCgAcccCTcC  
 >Bacillus\_Fam\_688\_22\_2 Nr. of seq. 2 Alignment length(with gaps) = 22  
 Alignment score = 0.803030  
 TCGCAAATAAACAgGaTAaGAT  
 >Bacillus\_Fam\_689\_22\_2 Nr. of seq. 2 Alignment length(with gaps) = 22  
 Alignment score = 0.643939  
 gTTTTGTCTAtTTTTaAgagAG



>Bacillus\_Fam\_690\_22\_2 Nr. of seq. 2 Alignment length(with gaps) = 22  
 Alignment score = 0.659091  
 AGTTCGTGCCAAAAtcaGaCag

>Bacillus\_Fam\_691\_22\_2 Nr. of seq. 2 Alignment length(with gaps) = 22  
 Alignment score = 0.750000  
 aGGTTCTCACGCTTCTCaGcAa

>Bacillus\_Fam\_692\_22\_2 Nr. of seq. 2 Alignment length(with gaps) = 22  
 Alignment score = 0.621212  
 AGGTTCTCACagaaCTCaCctG

>Bacillus\_Fam\_693\_22\_2 Nr. of seq. 2 Alignment length(with gaps) = 22  
 Alignment score = 0.651515  
 TTcGATAATaAAAcTTgGaATT

>Bacillus\_Fam\_694\_22\_2 Nr. of seq. 2 Alignment length(with gaps) = 22  
 Alignment score = 0.795455  
 cTATaCTTTACTCCGATCtCTT

>Bacillus\_Fam\_695\_21\_2 Nr. of seq. 2 Alignment length(with gaps) = 21  
 Alignment score = 0.603175  
 AAGAACCccATAACaCAnGct

>Bacillus\_Fam\_696\_21\_2 Nr. of seq. 2 Alignment length(with gaps) = 21  
 Alignment score = 0.603175  
 CtAaGcTCAaATGCCAATGgg

>Bacillus\_Fam\_697\_21\_2 Nr. of seq. 2 Alignment length(with gaps) = 21  
 Alignment score = 0.634921  
 gGCAAATAGAACGaggTTTcc

>Bacillus\_Fam\_698\_21\_2 Nr. of seq. 2 Alignment length(with gaps) = 21  
 Alignment score = 0.658730  
 CTCCAaCTTGcGGATaGaGcN

>Bacillus\_Fam\_699\_21\_2 Nr. of seq. 2 Alignment length(with gaps) = 21  
 Alignment score = 0.785714  
 aTATATCAAGAAATTTaGtGA

>Bacillus\_Fam\_700\_21\_2 Nr. of seq. 2 Alignment length(with gaps) = 21  
 Alignment score = 0.626984  
 TCGCCCGTAAATCtCaAaAtt

>Bacillus\_Fam\_701\_21\_2 Nr. of seq. 2 Alignment length(with gaps) = 21  
 Alignment score = 0.706349  
 CGCAGATAAcTCAaGAAAaag

>Bacillus\_Fam\_702\_21\_2 Nr. of seq. 2 Alignment length(with gaps) = 21  
 Alignment score = 0.603175  
 TTTaCGGTaGcACaAcTTTnA

>Bacillus\_Fam\_703\_21\_2 Nr. of seq. 2 Alignment length(with gaps) = 21  
 Alignment score = 0.682540  
 TTTGTCTGTAAGtGCaGctAgT

>Bacillus\_Fam\_704\_21\_2 Nr. of seq. 2 Alignment length(with gaps) = 21  
 Alignment score = 0.650794  
 TTGGCGaAAtTACagTCAAGN

>Bacillus\_Fam\_705\_21\_2 Nr. of seq. 2 Alignment length(with gaps) = 21  
 Alignment score = 0.666667  
 ACtGGCGAaAAAAAccTAATa

>Bacillus\_Fam\_706\_21\_2 Nr. of seq. 2 Alignment length(with gaps) = 21  
 Alignment score = 0.706349  
 GCAAAATAAAAAaTGggaATAc

>Bacillus\_Fam\_707\_21\_2 Nr. of seq. 2 Alignment length(with gaps) = 21  
 Alignment score = 0.666667  
 TTATCaACAcAcTTTTAGaaT

>Bacillus\_Fam\_708\_21\_2 Nr. of seq. 2 Alignment length(with gaps) = 21  
 Alignment score = 0.666667  
 aaAATACGGCGGGTTTGAgCa  
 >Bacillus\_Fam\_709\_21\_2 Nr. of seq. 2 Alignment length(with gaps) = 21  
 Alignment score = 0.619048  
 TTGGTTGATTTcCTacaGaAg  
 >Bacillus\_Fam\_710\_21\_2 Nr. of seq. 2 Alignment length(with gaps) = 21  
 Alignment score = 0.690476  
 GAaAGTaTaTCCAAAATAGCc  
 >Bacillus\_Fam\_711\_21\_2 Nr. of seq. 2 Alignment length(with gaps) = 21  
 Alignment score = 0.809524  
 GCAACATCcTGTTTcAGCaCT  
 >Bacillus\_Fam\_712\_21\_2 Nr. of seq. 2 Alignment length(with gaps) = 21  
 Alignment score = 0.873016  
 TGTTAGTacATTAAAGAGTGA  
 >Bacillus\_Fam\_713\_21\_2 Nr. of seq. 2 Alignment length(with gaps) = 21  
 Alignment score = 0.746032  
 GGaGgcTCTTCgCCATCACCC  
 >Bacillus\_Fam\_714\_21\_2 Nr. of seq. 2 Alignment length(with gaps) = 21  
 Alignment score = 0.746032  
 ATCCGACAGTaAGCcGCgGcT  
 >Bacillus\_Fam\_715\_21\_2 Nr. of seq. 2 Alignment length(with gaps) = 21  
 Alignment score = 0.809524  
 TTCAAAaTTTCACTGTGaTCg  
 >Bacillus\_Fam\_716\_21\_2 Nr. of seq. 2 Alignment length(with gaps) = 21  
 Alignment score = 0.650794  
 TtTaTCAACCACTTcTCcgCt  
 >Bacillus\_Fam\_717\_21\_2 Nr. of seq. 2 Alignment length(with gaps) = 21  
 Alignment score = 0.873016  
 TTACTACCAACaACCaCAGAT  
 >Bacillus\_Fam\_718\_21\_2 Nr. of seq. 2 Alignment length(with gaps) = 21  
 Alignment score = 0.682540  
 AgaGCcGATACaCCCGTaAAA  
 >Bacillus\_Fam\_719\_21\_2 Nr. of seq. 2 Alignment length(with gaps) = 21  
 Alignment score = 0.698413  
 AATCACTACGaAAaTcAaAaT  
 >Bacillus\_Fam\_720\_21\_2 Nr. of seq. 2 Alignment length(with gaps) = 21  
 Alignment score = 0.746032  
 GTATTTCGACAcAagTTGGATc  
 >Bacillus\_Fam\_721\_21\_2 Nr. of seq. 2 Alignment length(with gaps) = 21  
 Alignment score = 0.888889  
 cTCACGAGTAAATCgTGAAAA  
 >Bacillus\_Fam\_722\_21\_2 Nr. of seq. 2 Alignment length(with gaps) = 21  
 Alignment score = 0.682540  
 acCTTcATCTCCGTCaCCaGG  
 >Bacillus\_Fam\_723\_21\_2 Nr. of seq. 2 Alignment length(with gaps) = 21  
 Alignment score = 0.698413  
 gTGGTCaATAaAAcCAgAAAA  
 >Bacillus\_Fam\_724\_21\_2 Nr. of seq. 2 Alignment length(with gaps) = 21  
 Alignment score = 0.619048  
 TGTTAAaaAAAAcCaCAAacc  
 >Bacillus\_Fam\_725\_21\_2 Nr. of seq. 2 Alignment length(with gaps) = 21  
 Alignment score = 0.825397  
 CGCCAATAGAACCTctaAATC

```

>Bacillus_Fam_726_21_2 Nr. of seq. 2 Alignment length(with gaps) = 21
Alignment score = 0.619048
aTcCGACAGTTGGaaCacGCT
>Bacillus_Fam_727_21_2 Nr. of seq. 2 Alignment length(with gaps) = 21
Alignment score = 0.682540
TTGGCGAAATcCcNgCacAGT
>Bacillus_Fam_728_20_2 Nr. of seq. 2 Alignment length(with gaps) = 20
Alignment score = 0.800000
TATCCATTGTaAATTgaATA
>Bacillus_Fam_729_20_2 Nr. of seq. 2 Alignment length(with gaps) = 20
Alignment score = 0.616667
GACGCAATTaaccatATTA
>Bacillus_Fam_730_20_2 Nr. of seq. 2 Alignment length(with gaps) = 20
Alignment score = 0.700000
TTTGCGTCTCCcacctGATA
>Bacillus_Fam_731_20_2 Nr. of seq. 2 Alignment length(with gaps) = 20
Alignment score = 0.750000
TATATCGGCGtTTTTaGaaA
>Bacillus_Fam_732_20_2 Nr. of seq. 2 Alignment length(with gaps) = 20
Alignment score = 0.883333
CTCATATATTTcGTTCTCcG
>Bacillus_Fam_733_20_2 Nr. of seq. 2 Alignment length(with gaps) = 20
Alignment score = 0.750000
TTTGGCTGATATTTTcCcac
>Bacillus_Fam_734_19_2 Nr. of seq. 2 Alignment length(with gaps) = 19
Alignment score = 0.649123
cCcGGaTGaAGGTCCTGGT
>Bacillus_Fam_735_19_2 Nr. of seq. 2 Alignment length(with gaps) = 19
Alignment score = 0.622807
cTaGAcAAGCAAGaACAaT
>Bacillus_Fam_736_19_2 Nr. of seq. 2 Alignment length(with gaps) = 19
Alignment score = 0.649123
AAgCCAAaGcCGCCaCACA
>Bacillus_Fam_737_18_2 Nr. of seq. 2 Alignment length(with gaps) = 18
Alignment score = 0.666667
ACGGGGaacACCGGAcCa
>Bacillus_Fam_738_18_2 Nr. of seq. 2 Alignment length(with gaps) = 18
Alignment score = 0.629630
CCaGATACAccAaAaAAA
>Bacillus_Fam_739_18_2 Nr. of seq. 2 Alignment length(with gaps) = 18
Alignment score = 0.629630
TGaTGaTGcTGaCCaTGG
>Bacillus_Fam_740_18_2 Nr. of seq. 2 Alignment length(with gaps) = 18
Alignment score = 0.648148
aACAACAaCAaCAGCaGt
>Bacillus_Fam_741_18_2 Nr. of seq. 2 Alignment length(with gaps) = 18
Alignment score = 0.925926
CCAGGaGAAGGTGAAGGC
>Bacillus_Fam_742_18_2 Nr. of seq. 2 Alignment length(with gaps) = 18
Alignment score = 0.629630
aTCTTcaTCTagTCCTGG
>Bacillus_Fam_743_18_2 Nr. of seq. 2 Alignment length(with gaps) = 18
Alignment score = 0.629630
CACCcAATCCAaCTaagC

```

>Bacillus\_Fam\_744\_18\_2 Nr. of seq. 2 Alignment length(with gaps) = 18  
 Alignment score = 0.703704  
 GCCTCTTGcTcAGCTTca  
 >Bacillus\_Fam\_745\_18\_2 Nr. of seq. 2 Alignment length(with gaps) = 18  
 Alignment score = 0.777778  
 ATcAGTACCAGTaCCaGG  
 >Bacillus\_Fam\_746\_18\_2 Nr. of seq. 2 Alignment length(with gaps) = 18  
 Alignment score = 0.629630  
 AaaACTTcTAGAAaCCGg  
 >Bacillus\_Fam\_747\_18\_2 Nr. of seq. 2 Alignment length(with gaps) = 18  
 Alignment score = 0.777778  
 GGcCCGAATCCCATgCCa  
 >Bacillus\_Fam\_748\_18\_2 Nr. of seq. 2 Alignment length(with gaps) = 18  
 Alignment score = 0.851852  
 GGAGCACCTGTTaCGCCc  
 >Bacillus\_Fam\_749\_18\_2 Nr. of seq. 2 Alignment length(with gaps) = 18  
 Alignment score = 0.629630  
 CCggcAGaTCCAGTAAcT  
 >Bacillus\_Fam\_750\_18\_2 Nr. of seq. 2 Alignment length(with gaps) = 18  
 Alignment score = 0.703704  
 GGTGGaATgGGCGGaCaT  
 >Bacillus\_Fam\_751\_18\_2 Nr. of seq. 2 Alignment length(with gaps) = 18  
 Alignment score = 0.777778  
 ATACCGGaGGcGAAGaAG  
 >Bacillus\_Fam\_752\_18\_2 Nr. of seq. 2 Alignment length(with gaps) = 18  
 Alignment score = 0.629630  
 CcTaCTgGTGcTGCTcGT  
 >Bacillus\_Fam\_753\_18\_2 Nr. of seq. 2 Alignment length(with gaps) = 18  
 Alignment score = 0.666667  
 CCAGCaGGaGCaACaGGa  
 >Bacillus\_Fam\_754\_18\_2 Nr. of seq. 2 Alignment length(with gaps) = 18  
 Alignment score = 0.703704  
 cTGGCTTTGaTcGTTcTG  
 >Bacillus\_Fam\_755\_18\_2 Nr. of seq. 2 Alignment length(with gaps) = 18  
 Alignment score = 0.648148  
 CcTGCTGtTTTgCTTGcT  
 >Bacillus\_Fam\_756\_18\_2 Nr. of seq. 2 Alignment length(with gaps) = 18  
 Alignment score = 0.629630  
 GGAaCcGGATTTGcTccT  
 >Bacillus\_Fam\_757\_16\_2 Nr. of seq. 2 Alignment length(with gaps) = 16  
 Alignment score = 0.625000  
 CTgAAcTCAACCAAcA  
 >Bacillus\_Fam\_758\_15\_2 Nr. of seq. 2 Alignment length(with gaps) = 15  
 Alignment score = 0.688889  
 TTATTatGTTTTTCc  
 >Bacillus\_Fam\_759\_15\_2 Nr. of seq. 2 Alignment length(with gaps) = 15  
 Alignment score = 0.733333  
 GGcGAACCaGGaGAT  
 >Bacillus\_Fam\_760\_15\_2 Nr. of seq. 2 Alignment length(with gaps) = 15  
 Alignment score = 0.666667  
 CaAAAACCaGAGGat  
 >Bacillus\_Fam\_761\_15\_2 Nr. of seq. 2 Alignment length(with gaps) = 15  
 Alignment score = 0.733333  
 TTCTTgTTCTTTgTa

>Bacillus\_Fam\_762\_15\_2 Nr. of seq. 2 Alignment length(with gaps) = 15  
 Alignment score = 1.000000  
 GGCATGATGTGCGGC  
 >Bacillus\_Fam\_763\_15\_2 Nr. of seq. 2 Alignment length(with gaps) = 15  
 Alignment score = 0.644444  
 CCaGGCaaTGGCGaT  
 >Bacillus\_Fam\_764\_15\_2 Nr. of seq. 2 Alignment length(with gaps) = 15  
 Alignment score = 0.844444  
 GGcATTTCTTTgATC  
 >Bacillus\_Fam\_765\_14\_2 Nr. of seq. 2 Alignment length(with gaps) = 14  
 Alignment score = 0.738095  
 TTcTCTTTTTCtt  
 >Bacillus\_Fam\_766\_14\_2 Nr. of seq. 2 Alignment length(with gaps) = 14  
 Alignment score = 0.714286  
 TcATTACaTATCaC  
 >Bacillus\_Fam\_767\_12\_2 Nr. of seq. 2 Alignment length(with gaps) = 12  
 Alignment score = 0.666667  
 GGAgGAGTaaTT  
 >Bacillus\_Fam\_768\_12\_2 Nr. of seq. 2 Alignment length(with gaps) = 12  
 Alignment score = 0.694444  
 CCTgAaCCTaAG  
 >Bacillus\_Fam\_769\_12\_2 Nr. of seq. 2 Alignment length(with gaps) = 12  
 Alignment score = 0.666667  
 TGGCaTTTCTgT  
 >Bacillus\_Fam\_770\_12\_2 Nr. of seq. 2 Alignment length(with gaps) = 12  
 Alignment score = 0.805556  
 GATGCCcGATGCg  
 >Bacillus\_Fam\_771\_12\_2 Nr. of seq. 2 Alignment length(with gaps) = 12  
 Alignment score = 0.666667  
 aCaGGaGGAACA  
 >Bacillus\_Fam\_772\_12\_2 Nr. of seq. 2 Alignment length(with gaps) = 12  
 Alignment score = 0.777778  
 TCATGGccGTGA  
 >Bacillus\_Fam\_773\_12\_2 Nr. of seq. 2 Alignment length(with gaps) = 12  
 Alignment score = 0.777778  
 TTGaAcTGGTTG  
 >Bacillus\_Fam\_774\_12\_2 Nr. of seq. 2 Alignment length(with gaps) = 12  
 Alignment score = 0.777778  
 CaGGAACAGAcC  
 >Bacillus\_Fam\_775\_11\_2 Nr. of seq. 2 Alignment length(with gaps) = 11  
 Alignment score = 0.636364  
 GTTTCgaTATg  
 >Bacillus\_Fam\_776\_321\_1 Nr. of seq. 1 Alignment length(with gaps) = 321  
 Alignment score = 0.000000

TGAACGTTACGGTATGTCTTCCATCTCTAAATTTGGTTGTGTGCGAGAGTATAATGAAAGCCACCATTTCCCATTT  
 GTGGTACTCTGGAAAGACTTTTCTGGACATCTGGTCTCGCATCTCCATAGATCGCCTGACCTGCCACTACACCG  
 TCTACCAGTACTTCAATTTTCGACACTCCGCTTTCATCTAAAAACCAGCCCCGTACGTTTTGGGACCCGATAA  
 GTGTTTTGCCAGAAACCGGATCATCGATATACCCGAGGACATTTGCAATCGTTATAGTCTTTTCAGGCAATGT  
 TGTGACATAGCCGTTTCATTCCTGTTTCTC

>Bacillus\_Fam\_777\_255\_1 Nr. of seq. 1 Alignment length(with gaps) = 255  
 Alignment score = 0.000000

AGTAGGACGTTGCCAGGCAGATTAAACACANTCCTTTAGGGATGTGTTTTTTAATATGCATAAAGAGTATACT

CGGCGCAAAAAGAGCGCTGGTTCTGAAGAAGCAGCCCCCTACGAAGCGAAGCCCCGAAAGCGATCGAAGGAAGAA  
AACCAAGTACGTTTCGCGAGACGAATCGGTTCTCTTCGTGCGACCTCGTGAGAGGCATCGGGGAAATCGCTACA  
TGCCATACTTCCCCGAAGAAGAGAATCCGAAGAGAC

>Bacillus\_Fam\_778\_252\_1 Nr. of seq. 1 Alignment length(with gaps) = 252  
Alignment score = 0.000000

TTTTGCTTCGATTTAATCCTGACTGAGAAGCTACCTTTACTACTTGCTGTCCCTGTCCCCAGCACCGTTTTAC  
CACGTTTAATCGTCACCTTTGGCGCCGGCTTCTGCTTTACCTGTAATCGTTGTTTGATTATCGCCAAACCGATT  
GACGGACGGGGCTGATGGTGCTGTTTTGTCTTCCACTTTGAACGATTTGCCTGCACCCGTATTTCCAGCTTTA  
TCTGTTCGCATAGGCTGTCAGAACCGTTCCCTGCC

>Bacillus\_Fam\_779\_249\_1 Nr. of seq. 1 Alignment length(with gaps) = 249  
Alignment score = 0.000000

AAACAAAAAGCAGGAACGAAGCTTGTCGTTTATGCGGAAGATGCGGCAGGGAACAAGAGCGNTGAAACNGTNG  
TAACGGTTATTGATAAAACGGCTCCGGCAGCGCCGAAAGTCGGAGAAGTAAGCGATACAAGTACTGTGGTTAC  
AGGAACCACAGAAGCGGGCGCGAAAGTAACAGTAAATCCGGCTCGAACATTTTAGGNACGGCAACGGCTGAT  
CATACCGGTGCATTTAAGGTAACCATTGCA

>Bacillus\_Fam\_780\_246\_1 Nr. of seq. 1 Alignment length(with gaps) = 246  
Alignment score = 0.000000

GTTTTATCTACTTTTACTTCTACTGTGTTTTATTTTCNGTATTACCNGCATTATCTACACTGTAGTAAGTTA  
GAGTGTGGATGCCTTCTTTTTCTANGGTNAAGCTTGTGCCTTCGCTGAATTCAGCNCCATCGATAGAATAGTA  
GGTTGCTTTCACACCGCTTAGGTCATCAGTTGCTGTGCTCAGCTCAACATTCAGTCTTCTGTGTACCATTGATCC  
TCGACATTACTTACAGTAGTAGGAGCA

>Bacillus\_Fam\_781\_237\_1 Nr. of seq. 1 Alignment length(with gaps) = 237  
Alignment score = 0.000000

CCATTGGCTTTCACCCTTGCCAGCCGTTTCGATTTCGGATATCACTGATACTGCCGTTCCGCTGGACAGCTTGC  
TTATCACTTTTCCTTGTGTAGACGCCTTGTCTCGGACATTCAGCGAGGATCCAGAGTCGACTTTCACATATTT  
GGTAACCGNNTTGGCCGACGGTTTTGGTGTACCTGTGCTGGCTGACGGCTTGCTTGATGACAAATATTGTGAA  
CTTACGTAGCCTGTTTTG

>Bacillus\_Fam\_782\_237\_1 Nr. of seq. 1 Alignment length(with gaps) = 237  
Alignment score = 0.000000

TATACGTTTGTGCTGGAACACCGAAGCGGATGGAAGTGGTGAAACCTATAAAGAGGGTGACACGTTTACCC  
AAGGAATAGGAAATGTGACGTTCTATGCGCAGTGGTCTGTAAATCACTACGAGCTGCGATATGACGGGAACGG  
GCAAGATGGAGGAAGTGCGCCAGAAGCGGAATCTGTTGCGTATGGAAGTGAAGTGGAGGTATCGGATTCTCAA  
ACGTTAAGCCGAACCGGT

>Bacillus\_Fam\_783\_234\_1 Nr. of seq. 1 Alignment length(with gaps) = 234  
Alignment score = 0.000000

TTACTTTTTCTCCGTTTTTTAAATTTCCGAGAATTGCACTATTTGTATTTGCTTGACTTCTTACTCGCAGGCT  
CGTTGCGTTGATTGTTCCGCTTTCTTGTACTCCATTTGTGATGTCTTCACTGGCTTTTCTTCTTGTTCCTCA  
GCTTCTAGCTTCACAAACTCTAACGATACGTAACCTTCTTTTCCCTTTATAATTGATCTTCGCCAGCCGTTTG  
CTTTTCCTAAGATTG

>Bacillus\_Fam\_784\_232\_1 Nr. of seq. 1 Alignment length(with gaps) = 232  
Alignment score = 0.000000

TTCCATTTGACTCCTCTGTGTTAGACGGAGAAATTCGGTTTATCTCGGGAAATACTACTATTTCCCTTGAATT  
AAGGGAAGCTTTTCCGCTTATATGATCCAAATCCTTGGATTTTGCTTTTTTTGAAGGTAGTAAGCGGAATTT  
TACCCTTATATCTCCCTTTAAGCCGCAAAATTTTCATTAGACGGAAATTCCTCGCTTATGCTTCTCCACCT  
ATCCTTTGGCAAC

>Bacillus\_Fam\_785\_231\_1 Nr. of seq. 1 Alignment length(with gaps) = 231  
Alignment score = 0.000000

GAAAAAACTTGGTTGCCGCTAGATTTTCTGTAAATTGCCCTCTTTACTTGTCAATTTGCTGTCTTTCCATTTCGAA  
GATAGCAGTTCAGCGGCAGCCTTAGCTTTTTCTTACCTCCCTTCAGCCCACGCTCTTTCACCCTTAATAATGG  
TTGTTCAAGAAAAACAAGCCTGTTTTTCCACCTCTCTTTATGACAGGGAGGAATCACTTCTCTTTTTGCCTTC  
AACCTTTATTTTC

>Bacillus\_Fam\_786\_231\_1 Nr. of seq. 1 Alignment length(with gaps) = 231  
Alignment score = 0.000000

GTGTGTCGATAAATATTTAGTACTGACATATCCTTCTTTTCCATTAGCTTTGATCTTCGCCCCAACCTTTAGATT  
CCGAATACACCGTTACCTGCATGCCTTTTCGAAAGCTTCGCAACTATGCTGGCAGTTTCCGTCCCACCTTTTTTCG  
CATATTGAGCGTCCCAGAACTTACATTTACATATTTTCGTTCGTCTTTAACAGGGGTGGATGGTGTGGAACCC  
GTTACAGGCTTC

>Bacillus\_Fam\_787\_230\_1 Nr. of seq. 1 Alignment length(with gaps) = 230  
Alignment score = 0.000000

GAACAACCATTATGAAGGGTGAGAGAGGGAAAAAGTTTGGGAAGTAAGAAAAGCTAAGGGCTCTGCCGAACTTC  
CGTCTTTGAAGGGAGGAAAGAGGACTTCGAAAAGAATGCACTCTTTAAAAAGAATCTGGCAGAGCCCAAGCTT  
TGAAACAGAGGTTTATAAGGTCTGAAAAAGAGCGCCCTCCCTATCATAAAGAGGGGAGGAAAAACAGCGGT  
CTGTTTTTCTC

>Bacillus\_Fam\_788\_226\_1 Nr. of seq. 1 Alignment length(with gaps) = 226  
Alignment score = 0.000000

ATTTACGTGCCGATTTGGCTTCTTTTCGGTCCGGAACGGAGCTCTTTCGTGCCGAAATCATCACTTTTCGAGC  
GAGATTGGCGATTTTCGCGCCGGAGCTTAAATCTCTACGGTTCGAACCACTTAATTACTATTTTTTTATGAACC  
CCGTTGCTGTCCCAGTTATGTTAGCTATGGCACATCAGCTAATGCACATGCACAAACCATCATTACGGGCCGG  
ATTTCAA

>Bacillus\_Fam\_789\_226\_1 Nr. of seq. 1 Alignment length(with gaps) = 226  
Alignment score = 0.000000

GCTTCGCTTTCCTCGGGGCGAGCGCTGAGCTTCCTCGTCGTTTCTCTCCTGCGGGATCTCACCTGTCTCGCTC  
ATCCCGTAGGAGTCTTCTCATCTTTCACTGCCTTCCTTTGGTCTTTTCGACTAGGAACTATTTAGTAGCCTGCT  
TTTTGGAATGTGTATTTTCAGATAAGCTATGTTTCATTCCACATGAAACACCCTTTACTTAGTCGGATTCCAGCT  
CCAGATT

>Bacillus\_Fam\_790\_225\_1 Nr. of seq. 1 Alignment length(with gaps) = 225  
Alignment score = 0.000000

AAGCTTGATGAGGTTTTTAAACGGGAACCTCTAGACCTGCCACTCTTCGCTTTGGTGACCGTCATCCGTACGTCA  
TTCAGCTTAAAAAAGATTTAGCTGAAGCAGGATTCCCGGTCTCCGGTAGCCCGACGGAGTATTTTGGATCAGT  
CACCGAATCCCAAGTCAAGGCTTTCCAACGAGCTCACGGACTTACTGCTAATGGCGTTGTCGGATCTGCTACT  
TACGCA

>Bacillus\_Fam\_791\_222\_1 Nr. of seq. 1 Alignment length(with gaps) = 222  
Alignment score = 0.000000

TTATCCAAACTGATTAACCACGCAAAAACATATGAAAAGGATAAATATACCGAACTTCATACGGNGCNCTGC  
AACAAGCAATTAGCCATGCNGAAGCAGTGGTACAAAATGCGAANACACAAGATGAAGTAACGGAAGCNATTAG  
TCNTCTCCAAAAAGCGATTAATGGATTAGAAAAAATAGCAGAACCCAGAACCCAGAACTGAAGTAGATACGGGC  
GAG

>Bacillus\_Fam\_792\_219\_1 Nr. of seq. 1 Alignment length(with gaps) = 219  
Alignment score = 0.000000

GATGGGTTTCTGCGGAGTACTTAAATGTCAGTGGGTTCGGGCAGCGATGCGAGTGAAGGGTCTTCCTCCATTGG  
ATCGGCTACCACNACCGCAAGGCTTAACCTTCGCTCCGGTGCAAGGACTTCGAATCGTATTTTAAACGACATTG  
AACAACGGGCAGAACGTNGCCTTGCTTCAGAAACAAGGCAACTGGTATCAGGTTAAAGCCGGTTCTCAGACGG

>Bacillus\_Fam\_793\_214\_1 Nr. of seq. 1 Alignment length(with gaps) = 214  
Alignment score = 0.000000

TCAGGGTAGACCTTTATGCGAATAAGTATTGGCACCATGGAAGATGAAAAAGTTTATACTCAGTGTGGAATG  
AGCAGAGAGTCACCTGACTCCTGCGGGATCTAGCGGTCTCGTGAGACCCCGCAGGAGCCAAAAGCGACGAGGA  
GGCTCACGGGGCGCCCCGCGGAAAGCAGGTGGATCGCAGCGAATGGAACCTCACTATCTAAGTTATTT

>Bacillus\_Fam\_794\_213\_1 Nr. of seq. 1 Alignment length(with gaps) = 213  
Alignment score = 0.000000

CGCCTTAACTTGCGTTCTGGAGCAGGCACTAACCATAGCATTATCACTACCCCTTGCTAAAGGACAAAAAGTCG  
AGTTGCTTAAAAAGCAAGGTGGCTGGTACCAAGTTAAAGCGGGCAACCGTACTGGATGGGTTTCTGTTGACTA  
CTTAAATGTCAGCGGCTCTGGCAATGTGGACAACGCTCCTTCTAACGGCTCTGCCACAACCACTGCA

>Bacillus\_Fam\_795\_213\_1 Nr. of seq. 1 Alignment length(with gaps) = 213  
Alignment score = 0.000000

CCACCAGAAAAAGAAGGCCATTTCATTCAAAGGATGGTATCAAGATGAGTTGCTCACAGAAGCGTGGGATTTTCG  
AAACGAACACGGTTAGCGAAGATATGACCCTGTATGCAAAGTGGGAAATCAACGTTTATACTGTTAGTTTTGA  
ATCGAATGGNGGCAGCCAAGTATCGGAAGTAGAAGCCGAGTATGGTTCGTCNATCACAGAGCCAGCT

>Bacillus\_Fam\_796\_210\_1 Nr. of seq. 1 Alignment length(with gaps) = 210  
Alignment score = 0.000000

GACAATCCGAATGCTGNTTACGGTCCAACGACGACAACCTCGGGTGAAGGAATTCAGAAATATTATGGATTAG  
TGGTCAACGGCATTGGTGATGAAGTAACACTTGCTAAAATTGAAGAGATTTTAGCATCNCCTCCAAAACGG  
AGGCAGGCATGAAGACGTGATAGCGTTAAAGGAAAACCTTNTCTCGCCTCGGTTTCCATGTATCG

>Bacillus\_Fam\_797\_208\_1 Nr. of seq. 1 Alignment length(with gaps) = 208  
Alignment score = 0.000000

AGGGTGAGAGAGGGAGGAGTTTGGGAGGTAAGAAAACTAAGGCCTCCGCCGATCTGCCGTCTTTGGTAAAGG  
GAATCGGACAGTTTTTTAGGAGTGCTCTTCTTAACGGGATACAGGCAAGGTAGTGACGCTGAAAAACATCCCGA  
TCCGCCCTGTCATAAAGAGCGGTGGAAGCAAGCTTGCTTTTCATGATTAACTTTATGAC

>Bacillus\_Fam\_798\_206\_1 Nr. of seq. 1 Alignment length(with gaps) = 206  
Alignment score = 0.000000

TCGTGCCTGCGGGGTCTCGGTCATCCCTCTTTTCCGAAGGAGTCCGGGGCCCTTCGCTTCTTTTCACTCTTGG  
TGATACTTTGATTCCCTTTTTTTCATTGTTTCCGCTAGTTCGTTTTTGGTTCTGCTTCATTGGTGTGAT  
GGATTGGGCGTTCCATCCCGCTGTGGGACCGCTTTTCTTGGGAGGGCGCCCGAGCCTCT

>Bacillus\_Fam\_799\_206\_1 Nr. of seq. 1 Alignment length(with gaps) = 206  
Alignment score = 0.000000

AAAGAAAAGCGTAAACGCCCCGTTTAGCGACGTACAAACTTTAATAATAAGGATGAACGGCTAAAGTCGCGCCG  
TCCTGGCGCAACGCCGTTCTGACCAACGTCGTGTTGGCCCGAGATAAAGGAAACACAGCGAGGGACGAGCTGA  
TGTTGACTTATCGTAGGAAGAAGCTGAAAGTTTGCTAGTCGTTGGGCGTTGAAGCTGGAC

>Bacillus\_Fam\_800\_205\_1 Nr. of seq. 1 Alignment length(with gaps) = 205  
Alignment score = 0.000000

AAAGTGGAAGATCTGTTACGAATGATAAGTTTCGACACATTGAAAGGAAGTACCGATCAAAGNGCGATTGATG  
AAGCTCAAAAAGCNGTCAATAAACTTCCGGAAGGTCCAGAAAAAATCGNCTTGAANGATTTAGTGAACAAAG  
CACAAGATCTATTAAATAAAAAAACAAGCCGAAAAAGACTTGAACGATGCAAAGAAC

>Bacillus\_Fam\_801\_196\_1 Nr. of seq. 1 Alignment length(with gaps) = 196  
Alignment score = 0.000000

CGAATTAATACGTGGATTGGACCGAAGTGGATCAAACCAAACAATCCACTAATAGGGGAACCAACTCCGATCT  
CAACGAGGATNCACGATAACAGAAAATACCTATTTGCATAATCAACCGTGAATAGTGCTAGAAGAAATGAAT  
TTTTACGTCCGCAAACAGTGACAGCATTTGAAGAATGGAATGGATGGTAC



>Bacillus\_Fam\_802\_195\_1 Nr. of seq. 1 Alignment length(with gaps) = 195  
Alignment score = 0.000000

TCCATCACCAAAAGTGCAATGCAGCGGAGACCGGCCGACTCCTTCGGGAATAGAGTGAAGTTCGATACCCCG  
GACGCGCAGCTGAGGAGGCTCGACTCACTCCCCGAGGAAAGCGGACGGCCGCAGCGAAATGGAACGGACCTTG  
ACTCCACCAAGATCCTCATCTAAAGCAGAAAGACATCATGCCTACCTCC

>Bacillus\_Fam\_803\_195\_1 Nr. of seq. 1 Alignment length(with gaps) = 195  
Alignment score = 0.000000

ATAATCAACCATTTGCNAATACAAGAAGATCAGAAGTNTTACGTCCNCAAACGGTACAGGCAACAGGAGAATG  
GAATGGCTGGTACCGAATTAATACATGGGTAGGACCAAAGTGGATTAAACCGTCGAATGCGATTGTAGGAGAA  
ATTTAAANAAATCTCGCAAANTATAACATTAACGCAAAATACGCATTTGC

>Bacillus\_Fam\_804\_194\_1 Nr. of seq. 1 Alignment length(with gaps) = 194  
Alignment score = 0.000000

ACGTCGAATACACTAAGNCCGTTCCACTCGGATTGAGTTTGCTTATAAACACATCAAANTTCCGTTANAACCTT  
TGATCATATGCTCCNGCGGTGCTTGGGAAATTGNTGATGTTGTATANCCNGTCACATACGCATTTCCATCCT  
CATCGANNGCAATTCCATNTCCTNNATCANNATCACTTCNCCTAAAT

>Bacillus\_Fam\_805\_190\_1 Nr. of seq. 1 Alignment length(with gaps) = 190  
Alignment score = 0.000000

TTAAATCAAAATTGGGATTGTACATAGANATANGCAGTGTTCTAATCATCCTGCTGGGTTGATTTCCGTTGCA  
GGCGCTCGCTTTCCGAGGCCTGCCGGGAGTCTCATCATAGTAAGCTCCTTCGGGGTTTCCATAAAGCCAGCTG  
ATCCCGCAGGAGTCTCGCACCTTCCGCTCCAATCAACCTTTGAA

>Bacillus\_Fam\_806\_177\_1 Nr. of seq. 1 Alignment length(with gaps) = 177  
Alignment score = 0.000000

CAGAAACAACAAATGCTGAAGTAGTAGCAAAAACAGAAGCCATCCAAAAGCACTAGCAGGCTTAGAATTTGC  
AGGCCAAAACAGCCTTAAATGCAGCAAAAGCAAAAGCTGAGGAAAAGCAAGAAGCCGACTACACATCTGAAAGC  
TATAGCCCATTAAAAGCAGCATTAGAACTGC

>Bacillus\_Fam\_807\_172\_1 Nr. of seq. 1 Alignment length(with gaps) = 172  
Alignment score = 0.000000

TTACATATGGCTAGAGTAAAGCTTTGTGCTCTTTTTACTTCGTCCATCATCGTTTGAATTTTTTGATCGTGT  
AAAGCTTCGGTTTCAGAAAGCTTATCTTTTTGAATCGTAATTTTAAAAGAAAAAATTTGAAATATCATAATGT  
AATCGCTCCTTTAGGTTGTTTTCGTA

>Bacillus\_Fam\_808\_171\_1 Nr. of seq. 1 Alignment length(with gaps) = 171  
Alignment score = 0.000000

ATGTTGTTCCACGATTGAAGTTGCGCTACGGTTACGCCGAATTTCACTGCAATTCCACTAAGTGTATCACCTG  
ATTTAACGGTGTACGTGGATACGGTTGAATCGCCACCACCCTCGTAGGAGCTTTAACTTTCAAAACTTGTC  
AATCTTAATCACATCAGCGTTTGAG

>Bacillus\_Fam\_809\_168\_1 Nr. of seq. 1 Alignment length(with gaps) = 168  
Alignment score = 0.000000

TCTACCAATTTTAATNCCGAAAGTTCTTCCATCANTTCTTGATGTGTTTGTTTTAATTGTTCAAGTTCTTGGT  
ACTGACTTTGTTCTTTCAANGTAGCNNCCGATAACTGTTTCGAGTACTTCTTCATATGATTGNTTTAATTTTTC  
TAGTTCTTCGCTTTTGACTTGT

>Bacillus\_Fam\_810\_164\_1 Nr. of seq. 1 Alignment length(with gaps) = 164  
Alignment score = 0.000000

AACAGGGACGGTTCTCACTTGCCAGTTTGATAGTTTTTTTTATGATTTGGTCATAGTTATGTGCGATTTCTTTTC  
AAGTTACACGCGATTTTGATCGAGTTACGCGCGATTTACACGAGTTTGAAGCGATTTGGAAACCAACTGGAA  
AAACACTTCAATTAGGCT

>Bacillus\_Fam\_811\_164\_1 Nr. of seq. 1 Alignment length(with gaps) = 164  
Alignment score = 0.000000

GGTCACATTCCATGAGGTAAGATTTCAGCTTGTTTCAGTGATTTGATCACCGCACTCGGGACATTGTTTAGGTGG  
TAGGGTTCTAAAGAACTCCAACGGATTTTTAGTTTGCATGATGGTTTCCTCCTTTAAATGGTTTAGTAGTCTT  
CGCGTTTAGAAAGGCAGT

>Bacillus\_Fam\_812\_156\_1 Nr. of seq. 1 Alignment length(with gaps) = 156  
Alignment score = 0.000000

ATAAAGTGAATCTTCCATCAGTGAGGGTTTGCTTCATCCTCCACTGATGGTTAGTTGAACCAATCGGGGTTT  
TACAGGCTGTTTTATCACTACACTTCTCTCTATTTCTCCAACGAAAATGAAAGAGGGATTATTACAGCCTG  
TTAAACCGGG

>Bacillus\_Fam\_813\_156\_1 Nr. of seq. 1 Alignment length(with gaps) = 156  
Alignment score = 0.000000

TTCTTTCTTAATAGTATTTTTAAGAATTAACAGAAGAACCAGCTTGCGTGACTACTTCCTTTACATTGAATGC  
TTTTAGAGGATTTTGCTTTTAGTTGTACATCTTTTGATACAGCTTCTTTTTGTAAAGATAATACTTTGTTTCAT  
TTCTCATTC

>Bacillus\_Fam\_814\_156\_1 Nr. of seq. 1 Alignment length(with gaps) = 156  
Alignment score = 0.000000

ATTTTGACTGGGGGCGGGAACCTAAGGGTGCGGTTGATTACCGAGAAGGAAGAAATTCCGGGGGTTTCGGGAAC  
CTAAGGGAGGGTTTGTTACCGGGATGGAGAAAAATGNCTGTGNTCGGTAACCTAAAGAGTGTGGTTGGTTACC  
CTGGTGGGGA

>Bacillus\_Fam\_815\_156\_1 Nr. of seq. 1 Alignment length(with gaps) = 156  
Alignment score = 0.000000

AAAAAGGACTGCCTGGCACTGGAGCAAACCCGCCTGAACCATTTACCTAAAAAACCGAGACATCATCGGAAC  
AAAGTTCACGACCGCAAGATCCATAATCCCGTCTCCATTAATAATCTGCAGACGTGATGGAANTTGGACCCAAA  
CCTCCACTAG

>Bacillus\_Fam\_816\_155\_1 Nr. of seq. 1 Alignment length(with gaps) = 155  
Alignment score = 0.000000

CGCTTGCCATTCCGGACCACCACGTTTCTCCCAAATAGCAGCATAACGATCCTGACCATTACTACCGTAACCA  
CTTACNTGCATATCAACCGATAGCCTTGCGCAACCAAGTTCAATTGAACGTCCGCTGATATTGCTCTGCTGTCAA  
ACCATGTCTG

>Bacillus\_Fam\_817\_155\_1 Nr. of seq. 1 Alignment length(with gaps) = 155  
Alignment score = 0.000000

TGCTCTACCGACTGAGCTATCGAGCCATAATAATATTTAACTTACAACCTTTATACTCCACTTGCAAAACGTCC  
TCTGTCCCTTCCTCTTCTAGCTTATTCTTTGATGCTTATGCGTCGGGACAACCTCGCAGCTGATTGCTGATGT  
GGTGCTCGT

>Bacillus\_Fam\_818\_155\_1 Nr. of seq. 1 Alignment length(with gaps) = 155  
Alignment score = 0.000000

TTTGTTGTAACAAAAGCAGAAAAAACCATGCACAAATCCAGAAATGCGCATGCATTTCAATTAATAGCTGAAGC  
AAAGCCATGTGTAATATCCAGGACATGGAAGAAAAACCCATAAAGTCAGTTATAACAGTAAAAAAGTTCCACA  
CCCGCATGA

>Bacillus\_Fam\_819\_154\_1 Nr. of seq. 1 Alignment length(with gaps) = 154  
Alignment score = 0.000000

GGTTCTCCTATATCTCGCTCGGCATCAGTCCAGGTCATACGGCGATGAACAGGACCCTTTTCGCTTTTCGTTTT  
TGTCCAGCAGCAGGGCCCTATCGCCTAGTGTCTTCCCTTACCTCGGGTCGATAAGTCGAAAACGAAAGGAGA  
GCCCTTTC

>Bacillus\_Fam\_820\_153\_1 Nr. of seq. 1 Alignment length(with gaps) = 153  
Alignment score = 0.000000

CTAGAAAACCTCGTAAAACCCATGCGAATCTCACGGTTTCACATGGTTTTATCAAAAGATCTCAAGAAAAGCAT  
GTGGAAGTGGAAGTTCTCCAAATATTGACCGTTTTAGAGCTAGAATTTCCAAACTATGGATGTTGCGCATG  
CCATTTC

>Bacillus\_Fam\_821\_150\_1 Nr. of seq. 1 Alignment length(with gaps) = 150  
Alignment score = 0.000000

TTCCGGCAATGAATTTTTAATGTGCTTCCAAACTCGATCGTCCACAAACACATCCGGAGTGGACAACGAAGTC  
GAAAACAATGAGTTATAAGAATCTCCTCTCATCGGTTCAAAAATTTCTTTTGTACCGGGTTAGGAAGCACAT  
AGTT

>Bacillus\_Fam\_822\_150\_1 Nr. of seq. 1 Alignment length(with gaps) = 150  
Alignment score = 0.000000

TATGGTGGATTGGAGCAAACGGCTCAGTGCAAGGGGCTTATTGGTATGAAGGAATGGCACGACGAGAGAGTTA  
TGAATTAGCACCAGCGGGAAGCGCTTCTACCAATGGAGGTATTGCAGCGGTGTCGAGAAGGCCAAACACTTTC  
GAAC

>Bacillus\_Fam\_823\_150\_1 Nr. of seq. 1 Alignment length(with gaps) = 150  
Alignment score = 0.000000

ACTACCCACATAACGTTTACACGTCCNTGNTTATCTACGAAAAACAAATCAAGTTGCTCATCGGTTTGACGTG  
CAGTTGCTNNNACCGNATCCAATGGAACGTAGTTNGGTGCAGTNAGAGGAATTGGTCCTTGCCAATTTCCGGT  
TCCG

>Bacillus\_Fam\_824\_148\_1 Nr. of seq. 1 Alignment length(with gaps) = 148  
Alignment score = 0.000000

GAACTTTTAAAAGCAGTAATGTAAGTTCATTATTCCGCAATTATTTATAAAAATTATCATACCTTAATACGAA  
AAAAGAGGAGGAAATCATATGGCAATCGCAATGGCAGTTTTAAATTTGTAGGTGGAGCACTTCCATTAGTAC  
AA

>Bacillus\_Fam\_825\_147\_1 Nr. of seq. 1 Alignment length(with gaps) = 147  
Alignment score = 0.000000

TTTTTCTTTGGTGGCTGCATCAAGATTTGCGAACATGCCGTGGCGTTACCCCTTTTCCGGAAGTGTTACACCA  
AGCTTTTTCAGCTGGTCCCTGTGCCTGGGTCTGTGTGTCAGGGTGCCGGCCTTCAGCTTTTCCATAATCGCCCCG  
C

>Bacillus\_Fam\_826\_144\_1 Nr. of seq. 1 Alignment length(with gaps) = 144  
Alignment score = 0.000000

ATGAAATTACCGAGCTGACTAATCTCGATCCCTCAATGGAAGATACCAATTTGGATGAAGTGGCGTCTGTAAA  
GGAAATCACTAATTCCATCGAGATTATTTCTACAAATGAAGATATCGAGACGATCGAAGGTGTCACTTCAC

>Bacillus\_Fam\_827\_143\_1 Nr. of seq. 1 Alignment length(with gaps) = 143  
Alignment score = 0.000000

ACTTTTTCAGTGCCCTTTTATTTGTATTGCAATGGCTACGTTTCGTTGCGCGCCTGATAGGATAAACCCACTCC  
TATCAGGCTTTTAAACGATTGCAACGACTACGCACATTGCTTAGGGGCACTTCAAAAGTGAAAGAACACC

>Bacillus\_Fam\_828\_139\_1 Nr. of seq. 1 Alignment length(with gaps) = 139  
Alignment score = 0.000000

TTTTGTGGAAAAGGGGACGGAGCTTACAGGATGATAAAGCAGGAAGCCTATCGCTCACACCCCTTCATTGAAA  
GGTTACTCAGCGTTACTGGACGTACTCATTTTCATCCAGTGGAAGAGCGAGCCACTTATGCTAA

>Bacillus\_Fam\_829\_135\_1 Nr. of seq. 1 Alignment length(with gaps) = 135  
Alignment score = 0.000000

GACGGTTCCCGTGCCTACACAGCAAATGTTAAACAATGACACGGTTTCCGTGATCGGCACGGCCACGAATACTG  
TCTTGACCACCATTTCGCTCGCTCCCGCAGGAAACGGTCCTNNTGCTATTGCCATCACGCCG

>Bacillus\_Fam\_830\_132\_1 Nr. of seq. 1 Alignment length(with gaps) = 132  
Alignment score = 0.000000

CATCAATGACAGAAACNGTATCACTATTTTCNTCATTAGCTACATAAATACGATTATTAGAGGGATTAACACC  
TACATCAGAAGGCTGANTCTCCGACAGGTACTATTCCAATAACAGCATTGTGNNACCTG

>Bacillus\_Fam\_831\_132\_1 Nr. of seq. 1 Alignment length(with gaps) = 132  
Alignment score = 0.000000

TTTTCTTCCCAGAACAATTGAATTTGCTCCAATGCTCCAGAAAATAATCTCACTTATAAATGCCATTGCCTCTG  
AAATAATGGTCCCTACAACCTCCATCGTACTAGTCAATATTTCCATTATCCATGTGCCG

>Bacillus\_Fam\_832\_132\_1 Nr. of seq. 1 Alignment length(with gaps) = 132  
Alignment score = 0.000000

TCGCGGGGTGGAGCATGGAGCAAAGCTTCTTGATTTTACATCGACATGTCGTGACGCATCAAGCTACAAAGCG  
TTACGAGAAGAGGAAACGATGACCTCTTAGAAAAAACATCATCTGTAAGCTATATAACG

>Bacillus\_Fam\_833\_131\_1 Nr. of seq. 1 Alignment length(with gaps) = 131  
Alignment score = 0.000000

CATTAAACCATNNACTTAAGANTAGCCCATTTGTTCCATNACCTAATCCTTTACAGCATCCACCCATCTGAAA  
GCCAGTCCNANNGTTGTCAAATNTCAACATCTTCCTATAATGGCTCCCATACAGTTT

>Bacillus\_Fam\_834\_129\_1 Nr. of seq. 1 Alignment length(with gaps) = 129  
Alignment score = 0.000000

TTTTTTGAACAATCACGAAACGATGAGCGAACAGCCGCAACGCTTTTAAGCCAGTCATGAACGCATTTGTCATG  
ATTGGCGAGCGGGGAGGAAGCCATCGTCCTACAAATAAAAAAGGGCGCTTTTCCC

>Bacillus\_Fam\_835\_128\_1 Nr. of seq. 1 Alignment length(with gaps) = 128  
Alignment score = 0.000000

TGGTTTACAGAAATACAGGTAACAAAATAGGAAGAATNNCAACGGANGGTGAAATTACAGAATATNATATNC  
CTACNNCAGATGCAGGTGCNTATNGATTATAGCNNNAGGTNCTGATGGTGCCTN

>Bacillus\_Fam\_836\_127\_1 Nr. of seq. 1 Alignment length(with gaps) = 127  
Alignment score = 0.000000

TTTCTGTAATTGATGGGTAAACAAATACTGTAATTGCCACGATTCCAGTAGGAAACTCAACCGACCGGTATAG  
AGATCAATCCATACATCAATCGAATTTATATAACAAATAGAGGTAGTAATACAG

>Bacillus\_Fam\_837\_127\_1 Nr. of seq. 1 Alignment length(with gaps) = 127  
Alignment score = 0.000000

CGTCGTTTTTCCAAAAGGGAAATGCGCCCTTTTATTTTAGTTTACGATGGCTCGCTTTTGTGCGACGTCGGTT  
ATGACAAATGCGCTCATAACCTACTTAAAAACGCGACAGCTCCCTCATCGTAC

>Bacillus\_Fam\_838\_126\_1 Nr. of seq. 1 Alignment length(with gaps) = 126  
Alignment score = 0.000000

GATGTTGAAGCATTAACAACAGAAAAAGAAGCTGTATCTTCTTCTCATNCTGAAGGAAAAGAAACACACGATT  
CAGTAAGCAAGGAAGAGAAAGCATCATCTCTAGTTGATGTAAAAGCGGACTTA

>Bacillus\_Fam\_839\_125\_1 Nr. of seq. 1 Alignment length(with gaps) = 125  
Alignment score = 0.000000

AGCGCCCTCCGCATTTCTTGTCCAGCTTCGGGCGCTATCGGCTCGAGGGCAAATGCCAGATGCCCAAGAGG  
TGGAAGAGCGATCTTCCGTGTCATCTGGGCTTTGGCTGGTCGCCGATGGGCC

>Bacillus\_Fam\_840\_124\_1 Nr. of seq. 1 Alignment length(with gaps) = 124  
Alignment score = 0.000000

GAACGTCCGAGCCGGCCGGCGGAGTGTCGCCCCAGCGCCGGAGTGACCGCTTTGCTCTTCGATGTGACCGCTC  
ACCTCCTCCGAAGCGCCGTCCGCGGCCGCCTTCCGACCGCTTTTCCCGGCC

>Bacillus\_Fam\_841\_124\_1 Nr. of seq. 1 Alignment length(with gaps) = 124  
Alignment score = 0.000000

GGAAAGCGCTTGGTCAGACCCGACCAGCATAAGTCGCTCCAGGATAGAAGGCGTCCTTTGCCTTCAATCCTGG  
AGTGGCTTATGACTCGAGGGTCTAGGCGCTGGAGCTGGACAATCGAAAAGC

>Bacillus\_Fam\_842\_123\_1 Nr. of seq. 1 Alignment length(with gaps) = 123  
Alignment score = 0.000000

GCTTCCGCTTTTCTTATTGTCCAGCTGCAGCGGCTAGCCCCCTCGAGACACTTCGGTCCATCACCTGAAGGCAA  
AGAACGCCCTTCAACTGCTGGCCCTCCAGTGCTTTTTCGGGGCTGGACAGCC

>Bacillus\_Fam\_843\_122\_1 Nr. of seq. 1 Alignment length(with gaps) = 122  
Alignment score = 0.000000

CGAAAAGCGGAAGCGCTCGTTTAGCTCCGGGAGTCAGATAAGGAAGTGGCGGAAAAGGCGCTTTTTGCCTTTN  
CNGACAATTCCGTTCTGACAGAGGAGCTGAGCGCTGGAGCTAGACAATG

>Bacillus\_Fam\_844\_122\_1 Nr. of seq. 1 Alignment length(with gaps) = 122  
Alignment score = 0.000000

CGAAAAGCGGAGCCGACTGTTCAGTCCTNTCAGTCAGATAAGAAAATCACCGGAAAAGTCCGGTTTTGACTTTTT  
TCGGGGATTTTGTTCGACAGAAGGACTAGGAGGCGGAGCTGGACAATG

>Bacillus\_Fam\_845\_122\_1 Nr. of seq. 1 Alignment length(with gaps) = 122  
Alignment score = 0.000000

GCATCATCTCTTGTGTTTCCATTGGTTGTTGTTTCATAAAAGCAACATCTCCTTTGGGTCATGAGAATGGTTTAT  
ACTTATTAGNTTACAGGTATTCCATNTTTAGTCGCCGGGACTAAAAACN

>Bacillus\_Fam\_846\_121\_1 Nr. of seq. 1 Alignment length(with gaps) = 121  
Alignment score = 0.000000

GAAATTGCGCCGAATCTCTCCTCCCCTGACGAACGAGAAGCAAGAAGTTCAAGGAGATGAGAGAGAGAGGACC  
GGAGCGTATCTATAATACGTGAGGATCCGAGCGAGCGAAATCGACGCA

>Bacillus\_Fam\_847\_120\_1 Nr. of seq. 1 Alignment length(with gaps) = 120  
Alignment score = 0.000000

TGGTATTACTTTGAGAGTAATGGCGTAATGAAAACAGATTGGTATTTTGATGGAACGAATTGGTTTTATATGA  
ATAGCAATGGTGGAATGGAGACAGGATGGAAAAAGATTCAAGGAACG

>Bacillus\_Fam\_848\_120\_1 Nr. of seq. 1 Alignment length(with gaps) = 120  
Alignment score = 0.000000

GAAGAAATCGATGTGATTCTTTTCCANGAAACCGACAATGCCGGGCAACGCGAAAAGCTGCCATCAGATGCGG  
AAAATGAAACAGTTGGCGGTGCGANAGGTGAAGACACAGACGAACCG

>Bacillus\_Fam\_849\_118\_1 Nr. of seq. 1 Alignment length(with gaps) = 118  
Alignment score = 0.000000

GCTTATAAGAAACCTCGCCTTTTTGAACTGCGCCGTGCTGTAGCAGCTGGCGGCCATTAATCTCATATAGCAT  
TTGACATCTAGTACTCTATTTTAGGAGGGATGCTCAATGAAAAAA

>Bacillus\_Fam\_850\_116\_1 Nr. of seq. 1 Alignment length(with gaps) = 116  
Alignment score = 0.000000

CAAAAGGTCGAACTTTACCTTTTGGGGATTTTACGTAACGAGAGCGAAGTCGTCACAAAGAAGAGCACAAATG  
GAGTGAACCTTCTCCATTAGTGCGAGTGACGAACGGAGCCTCGC

>Bacillus\_Fam\_851\_115\_1 Nr. of seq. 1 Alignment length(with gaps) = 115  
Alignment score = 0.000000

CTCATAGAACGGCTATATGAGACAAAATTAGTTGAAAATCAAGCCAAAATGTCCCATAGAATTGCCCCGATCC  
CCTGCTATGGGACAAAACCAGCGGAAGCCGAAGCAAAAATGG

>Bacillus\_Fam\_852\_114\_1 Nr. of seq. 1 Alignment length(with gaps) = 114  
Alignment score = 0.000000

AAAAGGTATAGGGCGACATTTTGGGTGCGGAGACGCTCGTTGCTCGCCATTGAGAAGTAACTGAATGGCTTT  
AAGAGCGGGCAACGGCTTTCCCCCTCTTACGAGAAAGAACC

>Bacillus\_Fam\_853\_114\_1 Nr. of seq. 1 Alignment length(with gaps) = 114  
Alignment score = 0.000000

TTCTCTGTTTCCTTCACTTTCCGACTCCGCTGTTTTTCTTCTGCTTCGCGAGAGCCTGTGCTTTTGCCTTT  
GCGGCTGCTGCGGCCTTTTTCTTCGCCAGGGCTAGTGCGTC

>Bacillus\_Fam\_854\_114\_1 Nr. of seq. 1 Alignment length(with gaps) = 114  
Alignment score = 0.000000

CACTTGATTCAATGGAAGAAGATGACTCCTCGTCTGAGACCTCCGAATCAATGCTACTGGATTCAATCCGGTGA  
GGGGGCGAGTGCATCGCAACAGGTAACCGTTTCATCCTCCA

>Bacillus\_Fam\_855\_111\_1 Nr. of seq. 1 Alignment length(with gaps) = 111  
Alignment score = 0.000000

TGTGGCGGAATGGCAGACGCGCTAGACTTAGGATCTAGTGCTTATGACGTGGGGGTTCAGTCCCTTCACCC  
GCACTTTGAATTTTATAGAGTGATGAAAAGTGAAGCGGT

>Bacillus\_Fam\_856\_111\_1 Nr. of seq. 1 Alignment length(with gaps) = 111  
Alignment score = 0.000000

TTGCTGCTGCGGCGGCTTTCTTTTTGGCTAGCTCCTTGGCGTCATCTGTTTCGGTTGCTGGAGCTTCGCCTG  
CTTCACTCTTTTGTTTGGCAGTGCGGCAGCCTTTGCT

>Bacillus\_Fam\_857\_111\_1 Nr. of seq. 1 Alignment length(with gaps) = 111  
Alignment score = 0.000000

CAGCGGCTTTTTCTTCGCTAAGTCGTCTGCTTCCCCAGCTGGCGGCGTTTCTGAGTCTGACTCTTTCGCTTT  
CATTTTCGCGAGTGCGGCAGCCTTTGCTTTTCGCTGCTG

>Bacillus\_Fam\_858\_110\_1 Nr. of seq. 1 Alignment length(with gaps) = 110  
Alignment score = 0.000000

GATATGGCAAAAGTGTTTCATGTTTTATATGTGTCAAATATTANNGAAACANCTATAAAACGTTGATATATAA  
GGGTNTATAAGATGTTTCNNATATTTATTAGGTCAAG

>Bacillus\_Fam\_859\_110\_1 Nr. of seq. 1 Alignment length(with gaps) = 110  
Alignment score = 0.000000

AGGATACCGCAAACGTGTTGCAAGTTAAGTTATANGTATATGAATAAGAAAAAACGNCTATCCTTTGATATA  
TAAGGNATTCGAGTNAAATGACAAAAAAGTTAGGGTA

>Bacillus\_Fam\_860\_108\_1 Nr. of seq. 1 Alignment length(with gaps) = 108  
Alignment score = 0.000000

ACAGGTCCAGTTGGTCCNCNAGGAGCGACGGGCCCCCCCCGNCCTACAGGAGCAGTAGGCCAGCAGGGCCAA  
CAGGAGCCCCAGGCCCGATCGGCCCAATGGGAGCG

>Bacillus\_Fam\_861\_106\_1 Nr. of seq. 1 Alignment length(with gaps) = 106  
Alignment score = 0.000000

TTTTTAGGAGATAGCGAACCTGCAACATGCCTTTGCGGGTTCGCAATTGGATAATATTAGGAAACACCATTCC  
TGTATAACTCATTTGCATCCTCGCACTTGGATA

>Bacillus\_Fam\_862\_105\_1 Nr. of seq. 1 Alignment length(with gaps) = 105  
Alignment score = 0.000000

CTGAAACAGCAACTGGAAACGAAAGACGAGCAGATTTCAGAAGCTAGAACAAGAAAAGCAAAAGTTAGAAACCC  
AAATGAATCAGTTGCAAGGAGGGCCAGAAAAT

>Bacillus\_Fam\_863\_105\_1 Nr. of seq. 1 Alignment length(with gaps) = 105  
Alignment score = 0.000000

AGCGCCCCATTCTAAAGGGAAAAATATATGTAGAAAGGCGCACAAATCGAAATAGCGGGCCATTGAGAGAAAAG  
AAAAAGCAATAGAAATGGCCAGCAAAATAAAAT

>Bacillus\_Fam\_864\_105\_1 Nr. of seq. 1 Alignment length(with gaps) = 105  
Alignment score = 0.000000

TATCTATGTCAACTGGTATAGCAATGAAGCAATTTCGATCAAAGCTTAAAAAACTAACGGCTCTTCCAACTGA  
GAATCTAAACAGTGTAATAAATTCCTCATTGC

>Bacillus\_Fam\_865\_105\_1 Nr. of seq. 1 Alignment length(with gaps) = 105  
Alignment score = 0.000000

CTTCAGACAGAGGCNGGCATGCCTTTCTCTTTGTTGTCCGAACCTACGGTAACTTCGGACTGTACTCGAGTTT  
TTCTTGAGGTTAAGTGTCCAAACCTTCTNCGA

>Bacillus\_Fam\_866\_104\_1 Nr. of seq. 1 Alignment length(with gaps) = 104  
Alignment score = 0.000000

GGACTCTGGTTGAGGATATCACGTATTTTGGGTCCAAACCTGAGCCTACTTCAGACTCTGGTTGAGCTCATCC  
TGAAATGTGAGTCCGAACCTAGTACAACCTC

>Bacillus\_Fam\_867\_104\_1 Nr. of seq. 1 Alignment length(with gaps) = 104  
Alignment score = 0.000000

TGGTTTCTTACCGTACCAATGATTTCCCTCTTTCTAGGGCAAAATCAACGCTTGATTTTTACCGCCTGAACC  
GTTTTTCTCTTCTTGGGAAATTCATTAA

>Bacillus\_Fam\_868\_104\_1 Nr. of seq. 1 Alignment length(with gaps) = 104  
Alignment score = 0.000000

GAGGTGTGTTTCGGAGCTAAACGCGACTATGAAATCCTATATATGGAAAATAGTGTGCGTGGAAATGCTCTAAT  
CACGACAGAATAATCCAATAAATGGATAACA

>Bacillus\_Fam\_869\_104\_1 Nr. of seq. 1 Alignment length(with gaps) = 104  
Alignment score = 0.000000

TTTTCTGAATTGCAACGCTTTATGGGTTCTATGAAACCTGCTATATTACCACTTTTGAAGATTACAACCCATT  
ACGGGAACCTATGAACCGCACTATGCGACCGC

>Bacillus\_Fam\_870\_104\_1 Nr. of seq. 1 Alignment length(with gaps) = 104  
Alignment score = 0.000000

CGTCAAGTCCCGGTGTANGATTAAAAATCCGGCGGGTTCCGAATGAAATCGGGCCAGATGGAAGACAAATCGG  
GCGGGAATCAAGGTAAATCCGGCAAGCCGGG

>Bacillus\_Fam\_871\_104\_1 Nr. of seq. 1 Alignment length(with gaps) = 104  
Alignment score = 0.000000

GAAAGCGGCGACTTTCAGAAAGAATCCGGCGGGGAAAGCGAGGAAATCCGGCGAGANACATTTCGAGTGACTGGT  
TCGGGTGAAAAAACGGCGGGATTAGAAAG

>Bacillus\_Fam\_872\_104\_1 Nr. of seq. 1 Alignment length(with gaps) = 104  
Alignment score = 0.000000

ACCCGCCCCGATTATTCACCTTTCTCGCCGGATAATTGACCCGGATTGACCCAGATTCCAGAACTGGCCCCGAT  
TTTCTTTGGATCCCCCGGCATTCGAGCTCAC

>Bacillus\_Fam\_873\_104\_1 Nr. of seq. 1 Alignment length(with gaps) = 104  
Alignment score = 0.000000

ACAAGAAATTGGGTCTGAATAAAATCGTAATTCAGACAAGAGATCTGCTAAGGTGAGAAATCAAGTCCGAATG  
GGCGGGGGATTTCAGACAGAAAAGAGACTTCA

>Bacillus\_Fam\_874\_103\_1 Nr. of seq. 1 Alignment length(with gaps) = 103  
Alignment score = 0.000000

TTTATTCTACCTTCACACGATTCTCCNCGTCATGACGGGACTTTAAAACATGGTTCTTACCCCTTCAGACCGG  
GGCGTTCACTCTAAAAGGATATTAAATCGT

>Bacillus\_Fam\_875\_103\_1 Nr. of seq. 1 Alignment length(with gaps) = 103  
Alignment score = 0.000000

AACTTTTGGAAAAAGTGCTGAACTAAAGAGTGGAACGCGGAACCGCCAGAGGAATGCTGAAAAAATGGAGA  
TTAACGCTGAAATAGGGGAGGAAAACGCTG

>Bacillus\_Fam\_876\_102\_1 Nr. of seq. 1 Alignment length(with gaps) = 102  
Alignment score = 0.000000

GGTTGGAAGCACATGGAACCTTGCAATCAAAAATATAGATACACTAAAATCATTCTCTGACCCTTTGAAAGAT  
ACACGAAAAGCCCTTGCTTCAATTGCAGA

>Bacillus\_Fam\_877\_99\_1 Nr. of seq. 1 Alignment length(with gaps) = 99  
Alignment score = 0.000000

AACAAAAATAACAGTAACGATGAAGATACAGAAACAACATCGAATGAAAAATAACAATACAAAACAAGATA  
ACGATAATCAACAAAATTCTAACAAC

>Bacillus\_Fam\_878\_99\_1 Nr. of seq. 1 Alignment length(with gaps) = 99  
Alignment score = 0.000000

CGAAGAAGAACTACATGTAGANAACTACTAAGCATNAATTTGGAAAAACGCTAGAAACGTATGCGCAAAGT  
GGTGAGATAGCAGAACAAATNGAACG

>Bacillus\_Fam\_879\_93\_1 Nr. of seq. 1 Alignment length(with gaps) = 93  
Alignment score = 0.000000

ATTACCCAAGTAGAAATGAACCTGCACCTCCAGATACACAACACATAATGCAAATGATGACAAGTCTCGAGGA  
TCGATTAAATAAACTCACTA

>Bacillus\_Fam\_880\_90\_1 Nr. of seq. 1 Alignment length(with gaps) = 90  
Alignment score = 0.000000

CGTTCTACTTGCTGACGATCACCTTTTGCCTGATCGTTTGGCACTTCATTTCTTCTGGGTTATTTATTTCGAT  
TAGCTACTTCCAATTCT

>Bacillus\_Fam\_881\_84\_1 Nr. of seq. 1 Alignment length(with gaps) = 84  
Alignment score = 0.000000

ACTTCTCGTTGAACTGTCGTTCCATTTACGCTCACGTTTCCGCTATTTACTGATCCTTGATTCTTCACATTAT  
CCTGTACGTTT



>Bacillus\_Fam\_882\_84\_1 Nr. of seq. 1 Alignment length(with gaps) = 84  
Alignment score = 0.000000

AATTAGCAGATGGCTCAAGTCAAGTAACAGGCGGTTTAGGAACATTATCTGTAGGAGCAAATCAAATGGCAGG  
TGGAGTAAATC

>Bacillus\_Fam\_883\_84\_1 Nr. of seq. 1 Alignment length(with gaps) = 84  
Alignment score = 0.000000

AACTCTTTCTTTGCGCATTCATCAATTACTTCTTCGCTAATAAATGGTGCCACNCNTGTTAATCCTTTAATAC  
CATTCGTTTCA

>Bacillus\_Fam\_884\_84\_1 Nr. of seq. 1 Alignment length(with gaps) = 84  
Alignment score = 0.000000

AAGCTGTGGAACAAGAAGACACAGAATCGAAACAAGCTGATGCAGAAATCGCTGTTCAAGAAAAGGAAGAGCT  
AAAAACAAGTTG

>Bacillus\_Fam\_885\_81\_1 Nr. of seq. 1 Alignment length(with gaps) = 81  
Alignment score = 0.000000

ACTCAGGTTGGTTGACTTGGTCATTAAGATCTTCAATAACTTCTGTGATTGGAGCAGAGTCAATAGGTATTTTC  
TGAACCTG

>Bacillus\_Fam\_886\_78\_1 Nr. of seq. 1 Alignment length(with gaps) = 78  
Alignment score = 0.000000

AGGAGCAAGAATCGGAAGAAGAAGTAGCATTAAATTCTGATGCAAATCAACCAGAAGTAGAAGAACAATCACT  
GCAAG

>Bacillus\_Fam\_887\_78\_1 Nr. of seq. 1 Alignment length(with gaps) = 78  
Alignment score = 0.000000

CAGAGAACAATCAGGAAGGAACAGCGAAAACAGTGTTGGCAGAAAGTAATCAGGCAGGAGCATCAGAACCAGC  
GTCGT

>Bacillus\_Fam\_888\_76\_1 Nr. of seq. 1 Alignment length(with gaps) = 76  
Alignment score = 0.000000

TGAAGCTTGACGCGAAAAGATGAAGTAAAACGTTGATATAAGGGATAGAAGTGCATAGCTTGACGTAAGCA  
ACG

>Bacillus\_Fam\_889\_75\_1 Nr. of seq. 1 Alignment length(with gaps) = 75  
Alignment score = 0.000000

TATTATCTGGGTCAGTTGCATCTTTAGGGTCTTCAATCGGATCTTCTTTATTAGTGCCCCATCATTTTCATC  
GA

>Bacillus\_Fam\_890\_75\_1 Nr. of seq. 1 Alignment length(with gaps) = 75  
Alignment score = 0.000000

GAGCAAGATTCTGATTCCTCTCTAGATGAAGATGTTTCTCTTGATAACGACGCTTCTGAAGACCAGGATGCAG  
AT

>Bacillus\_Fam\_891\_74\_1 Nr. of seq. 1 Alignment length(with gaps) = 74  
Alignment score = 0.000000

CTTTCAATCCCCTAAATCGGGTCACATCTTTTGCTACGANNTATGAAGATTCGTTAANAATCTAACAGTTATT  
N

>Bacillus\_Fam\_892\_73\_1 Nr. of seq. 1 Alignment length(with gaps) = 73  
Alignment score = 0.000000

CACGCAAGTATCACTATGGTAATTTGACGGACATAACTCCACAACGAGATCCCAGAAAGAATCTCTAAAATGA

>Bacillus\_Fam\_893\_72\_1 Nr. of seq. 1 Alignment length(with gaps) = 72  
Alignment score = 0.000000  
CAGTAACACCAGTTGCGCCAATCGAAAATGAAGTACCAAATTCAGAAGTGGCCGCTGGGCCAATGTCAACAC

>Bacillus\_Fam\_894\_70\_1 Nr. of seq. 1 Alignment length(with gaps) = 70  
Alignment score = 0.000000  
TGAGTGCGTGGATTGAAATAACTACGNCNTTGANCAATGCAATATCNCAATTAGCTAGTCGCACTTTTTTG

>Bacillus\_Fam\_895\_69\_1 Nr. of seq. 1 Alignment length(with gaps) = 69  
Alignment score = 0.000000  
TAATTTCTGACTTTGTACCTTCAATAGATGTTCCGTTTGTAAATGTTTCAGGTAAAGAGAATTATATGGT

>Bacillus\_Fam\_896\_69\_1 Nr. of seq. 1 Alignment length(with gaps) = 69  
Alignment score = 0.000000  
GTCGCACCCCTACATGGGTGCGTGGATTGAAATNAANGNGNCAATNAANNCGNATNNTTNATNAGNNNCN

>Bacillus\_Fam\_897\_68\_1 Nr. of seq. 1 Alignment length(with gaps) = 68  
Alignment score = 0.000000  
GTTTTATCTGAACGTAGTGGGATATAAAGTTTAANTTCGCATAANAANCTNTNACCTTAGCCGANNNT

>Bacillus\_Fam\_898\_68\_1 Nr. of seq. 1 Alignment length(with gaps) = 68  
Alignment score = 0.000000  
GTCGCACTCTATGTGAGTGCGTGGATTGAAATANCTNTTTGNNCCNGNTCAGCNTANNTTNCAGTACN

>Bacillus\_Fam\_899\_68\_1 Nr. of seq. 1 Alignment length(with gaps) = 68  
Alignment score = 0.000000  
TCGCACTCTATATGAGTGCGTGGATTGAAATTCCTTTCTNCTNTTTCTTTAGCCGTTTCNNCGNTTGCAG

>Bacillus\_Fam\_900\_68\_1 Nr. of seq. 1 Alignment length(with gaps) = 68  
Alignment score = 0.000000  
GTCGCACTCTTAGTGAGTGCGTGGATTGAAATNTAATGGCAACTACACCCAAAAGAAAAAGGCAAATC

>Bacillus\_Fam\_901\_68\_1 Nr. of seq. 1 Alignment length(with gaps) = 68  
Alignment score = 0.000000  
TGGATTGAAATNNGATTANNCAGNNTTNAATGATTNNAATAATCNNTGTGCGCACTCCTTGTGAGTGCG

>Bacillus\_Fam\_902\_67\_1 Nr. of seq. 1 Alignment length(with gaps) = 67  
Alignment score = 0.000000  
GTCATATCTCCATCTAATCCGTTGCTGTGATATGATANNNGCNNTCANCANNTNGATGNTGNNAANN

>Bacillus\_Fam\_903\_67\_1 Nr. of seq. 1 Alignment length(with gaps) = 67  
Alignment score = 0.000000  
AAAACTGAAAGAGTGCCAAACTANGTTNANATNGTNCATNTTNTCNANANNGTTTTCTATACC

>Bacillus\_Fam\_904\_67\_1 Nr. of seq. 1 Alignment length(with gaps) = 67  
Alignment score = 0.000000  
GGTACTCTCTCAGTTTTTCGGTATAGAGAAACAAGTCCACGANTGTGNAAGANTACGATTNNGTTTT

>Bacillus\_Fam\_905\_66\_1 Nr. of seq. 1 Alignment length(with gaps) = 66  
Alignment score = 0.000000  
ATCTTTTGATAATTCGTAGCCCGCTGGTGCTTCTATTTCAACGATTTTGTATTACCTATCGGTAA

>Bacillus\_Fam\_906\_66\_1 Nr. of seq. 1 Alignment length(with gaps) = 66  
Alignment score = 0.000000  
ATCATATCACAGCAATAATCTTAGGGGAACATGACNGNTNNTNNGANNATNTNCGNTNNNNN

>Bacillus\_Fam\_907\_66\_1 Nr. of seq. 1 Alignment length(with gaps) = 66  
Alignment score = 0.000000  
GTCGCATCCCACGCGGATGCGTGGATTGAAATGNCNANCATGNCGAGATANANCCGNNANTCTNGN

>Bacillus\_Fam\_908\_66\_1 Nr. of seq. 1 Alignment length(with gaps) = 66  
Alignment score = 0.000000  
GACAGCACCAACGCTACTGATACTTCCACCGCTACAAGCGGCTCCACCAGCGAGTCCGACACG

>Bacillus\_Fam\_909\_66\_1 Nr. of seq. 1 Alignment length(with gaps) = 66  
Alignment score = 0.000000  
ATCATAATACAGCAATGGCTTTAATGGAACATGACNTACAAATGTANGANAAATATTNGATTTNA

>Bacillus\_Fam\_910\_66\_1 Nr. of seq. 1 Alignment length(with gaps) = 66  
Alignment score = 0.000000  
GGATTGAAATNNGNTNGTATGCTNANNAGGTTTCGTTGGCNGNCGTCGCATCCCATGTGGGTGCGC

>Bacillus\_Fam\_911\_66\_1 Nr. of seq. 1 Alignment length(with gaps) = 66  
Alignment score = 0.000000  
GTCGCACTCTTCATGAGTGCGTGGATTGAAATNTTATANTCNTGATGGTCGAGNGCATNNGATCGN

>Bacillus\_Fam\_912\_65\_1 Nr. of seq. 1 Alignment length(with gaps) = 65  
Alignment score = 0.000000  
ATTTCAATCCTCGCACTCACATGGAGTGCGACCANTAAGTCTATTNCTGTTATGCAAGANNNGNCT

>Bacillus\_Fam\_913\_65\_1 Nr. of seq. 1 Alignment length(with gaps) = 65  
Alignment score = 0.000000  
TCCACGCACTCACATGGAGTGCGATTACGNCNNANNNATNNCGNNGANAACGTCNGANATTTCAA

>Bacillus\_Fam\_914\_65\_1 Nr. of seq. 1 Alignment length(with gaps) = 65  
Alignment score = 0.000000  
GTCGCACTCTTTGTGAGTGCGTGGATTGAAATAANCATNTTTCTGTAANCGGCAAAATAATNCNG

>Bacillus\_Fam\_915\_63\_1 Nr. of seq. 1 Alignment length(with gaps) = 63  
Alignment score = 0.000000  
TTTTTTCTACCGCAAAGAGAGATATTCCTACCACAAANAGCAATAATCCTACCGAAAATCCGA

>Bacillus\_Fam\_916\_63\_1 Nr. of seq. 1 Alignment length(with gaps) = 63  
Alignment score = 0.000000  
CAAGAAATAGAAAATTTAAATGAAACAATCATCAGTTACAAAACAAAAGAACTGAACATAAA

>Bacillus\_Fam\_917\_63\_1 Nr. of seq. 1 Alignment length(with gaps) = 63  
Alignment score = 0.000000  
AATACCATTTTNCNCNGATTGAACCCATGCTTTTGTTACCATAGCTCCATCAGCACCTAAGT

>Bacillus\_Fam\_918\_63\_1 Nr. of seq. 1 Alignment length(with gaps) = 63  
Alignment score = 0.000000  
TTTGTCCCATAGACCGTGAATCCGGAATTCTATGGGACATTTTATTTTACTTTTCAACTAAA

>Bacillus\_Fam\_919\_63\_1 Nr. of seq. 1 Alignment length(with gaps) = 63  
Alignment score = 0.000000  
TAGGAAAACTATCTGACGGATCTACTCAGCTAGCAACAGGAAAAGGCGATTTATCAAATGGTT

>Bacillus\_Fam\_920\_63\_1 Nr. of seq. 1 Alignment length(with gaps) = 63  
Alignment score = 0.000000  
AGAGTACCAAAACNTNNNNANANNNTNNGNTANTANGTNGTTTCTCTATACCGAAAACCTGAG

>Bacillus\_Fam\_921\_63\_1 Nr. of seq. 1 Alignment length(with gaps) = 63  
Alignment score = 0.000000  
GAAAAAGAGCAGCAAGCCAGNCTTACCATCCAAGAGCTGGAGAACAAAATCCAACACTCTTTG

>Bacillus\_Fam\_922\_62\_1 Nr. of seq. 1 Alignment length(with gaps) = 62  
Alignment score = 0.000000  
ATGAAAGCCATNATGAAGGAAAAACGCGGTNAANTNGCTTTCATCTGTAAAAAAGATCCAA

>Bacillus\_Fam\_923\_61\_1 Nr. of seq. 1 Alignment length(with gaps) = 61  
Alignment score = 0.000000  
AATCGAAACAAGGACGAAATACTCCAATGTAGGCCGAATTAATAGCAGTCAAGGCCGGATT

>Bacillus\_Fam\_924\_60\_1 Nr. of seq. 1 Alignment length(with gaps) = 60  
Alignment score = 0.000000  
AATACCAAGTAGATCCTTCTTTTAACCAGCCAGTAGCCATAGAACCATTTGCATTTAGAT

>Bacillus\_Fam\_925\_60\_1 Nr. of seq. 1 Alignment length(with gaps) = 60  
Alignment score = 0.000000  
TGGTATTACTTGAAAGAAAATGGATCNAATGATGACAGGTTGGACGTTAGTAAATGGTNAG

>Bacillus\_Fam\_926\_60\_1 Nr. of seq. 1 Alignment length(with gaps) = 60  
Alignment score = 0.000000  
TGGTATTATTTAAACGCTAATGGAGCAATGAAAACGGGCTGGCTATTANATCAAGGAGTT

>Bacillus\_Fam\_927\_60\_1 Nr. of seq. 1 Alignment length(with gaps) = 60  
Alignment score = 0.000000  
TAGTACCAAGTATTANCAAGNTGAAGCCATCCNGTATGCATNNCACCGTTATTNTTTAAN

>Bacillus\_Fam\_928\_60\_1 Nr. of seq. 1 Alignment length(with gaps) = 60  
Alignment score = 0.000000  
ATTTACATTTTTCTTACATTCACTCTCTTGATACCTTGCTTTTACCTCATCCTTTGA

```

>Bacillus_Fam_929_60_1 Nr. of seq. 1 Alignment length(with gaps) = 60
Alignment score = 0.000000
ATCACAAACACCACAGTCAGGAACAACACCATCACCAGCGAATCCGATGGAAAGTAAGCCA
>Bacillus_Fam_930_60_1 Nr. of seq. 1 Alignment length(with gaps) = 60
Alignment score = 0.000000
CCCAACCAGTAGCCATCGCACCCTAGGATGCATGAAGTACCAGGTGCTCCCATCANNNTA
>Bacillus_Fam_931_60_1 Nr. of seq. 1 Alignment length(with gaps) = 60
Alignment score = 0.000000
AGGTAGTACCACTTCCACCTGTATAAAGCCAACCGGTCTTCATCGAGCCATTACTAGTC
>Bacillus_Fam_932_60_1 Nr. of seq. 1 Alignment length(with gaps) = 60
Alignment score = 0.000000
TCAGCCAGCCNTTNTGAATNAGACCGTTTGATNCAAAGTAATANTGCTNNNATCCCTNGG
>Bacillus_Fam_933_60_1 Nr. of seq. 1 Alignment length(with gaps) = 60
Alignment score = 0.000000
AAGAGCGGAGCCATGCAAACGGCTGGCTGAAAGACGGATCGAAATGGTACTACCTCGGT
>Bacillus_Fam_934_60_1 Nr. of seq. 1 Alignment length(with gaps) = 60
Alignment score = 0.000000
GGAGTAATGAAAACCTAGTTGGTTAGTATTAGGTAATAAACATTATTACTTTGATAAATAT
>Bacillus_Fam_935_60_1 Nr. of seq. 1 Alignment length(with gaps) = 60
Alignment score = 0.000000
TGACGGTAGCCATGAGGAGGCAGGACATGAAGACGAAAATCATGAAGCTGACGCTCATGG
>Bacillus_Fam_936_58_1 Nr. of seq. 1 Alignment length(with gaps) = 58
Alignment score = 0.000000
TGGTATTATTTTGATNNNACCGGTGCAATGAAAACAGGNTGGCTGCTATNGTGGCAAN
>Bacillus_Fam_937_58_1 Nr. of seq. 1 Alignment length(with gaps) = 58
Alignment score = 0.000000
AGGATGGCGACATTCCTGTTACTCACAGGACGTGAGTGGTACTTAAGCGGAATTGG
>Bacillus_Fam_938_57_1 Nr. of seq. 1 Alignment length(with gaps) = 57
Alignment score = 0.000000
TTTCCAATGCCAAGCCACCATGGAGGAATGATGCCAATGCCAGAGCAAAGTGGAGGA
>Bacillus_Fam_939_57_1 Nr. of seq. 1 Alignment length(with gaps) = 57
Alignment score = 0.000000
AATGACTCATAAATACTCGATTCTTTTTTATCATGGATTCTTCAGCTGGTCTTATT
>Bacillus_Fam_940_57_1 Nr. of seq. 1 Alignment length(with gaps) = 57
Alignment score = 0.000000
CAAATGTTGGAAATGTAGTTGGTGCTCCTACTGGAACCTCCGCCTTGCGCCCCCTCTTA
>Bacillus_Fam_941_57_1 Nr. of seq. 1 Alignment length(with gaps) = 57
Alignment score = 0.000000
GGGCCTACTGGACCTACCGGAATAACTGGAGCAACTGGACCTTCTGGTGGACCTCCA
>Bacillus_Fam_942_56_1 Nr. of seq. 1 Alignment length(with gaps) = 56
Alignment score = 0.000000
TTTGGAGGTACTTCCTTTTAGCTATTTCGCTAGCATGATGTGACNTCATGACACTCT
>Bacillus_Fam_943_55_1 Nr. of seq. 1 Alignment length(with gaps) = 55
Alignment score = 0.000000
GTCTTCCTTAACNTAGANGCGNTTCTACGTTAAGATACCCGAAAAATTCCGANG
>Bacillus_Fam_944_55_1 Nr. of seq. 1 Alignment length(with gaps) = 55
Alignment score = 0.000000
GGACCATGATTAAGCTGCTATTTGTTGGTAGTTTTATACATAGCACTTGATTTCGC
>Bacillus_Fam_945_55_1 Nr. of seq. 1 Alignment length(with gaps) = 55
Alignment score = 0.000000
ATGAAGGACAANTTGAAGGAAAGAATCGAAGGAAAAATCAGTCCTTCATCGGAAGT
>Bacillus_Fam_946_55_1 Nr. of seq. 1 Alignment length(with gaps) = 55
Alignment score = 0.000000
CTTTATTTTGACCGGTGACCTCCTTCTTGGTACCTTTGCGGGAAGAATCNGACGN

```

>Bacillus\_Fam\_947\_55\_1 Nr. of seq. 1 Alignment length(with gaps) = 55  
Alignment score = 0.000000  
CTCATGAACCCCTCTATGAGAACAATTGCNAGCACCCCTCCTTCANCCCAGTCTGTC

>Bacillus\_Fam\_948\_54\_1 Nr. of seq. 1 Alignment length(with gaps) = 54  
Alignment score = 0.000000  
CCCGTCTTTCAGCATGATGTTTCAGGCAAATCCGGGGGAACACGGCGCTCTATTT

>Bacillus\_Fam\_949\_54\_1 Nr. of seq. 1 Alignment length(with gaps) = 54  
Alignment score = 0.000000  
TGTCTTTCATCANACCGATGAAGGACAAATAGCTACCAGCCACNCCTTGTA AAA

>Bacillus\_Fam\_950\_54\_1 Nr. of seq. 1 Alignment length(with gaps) = 54  
Alignment score = 0.000000  
TTCAGTGCCATCAAAACCGATTCCGGACGCTTCTTGAGGGTCTTATCCTGNTG

>Bacillus\_Fam\_951\_54\_1 Nr. of seq. 1 Alignment length(with gaps) = 54  
Alignment score = 0.000000  
ACAAAGACTTCCGGCTCTTCTTGNTTTCTCTACA ACTTCTGCTTCAGGTTC

>Bacillus\_Fam\_952\_54\_1 Nr. of seq. 1 Alignment length(with gaps) = 54  
Alignment score = 0.000000  
ATTGTTGGAAACACAAACATCACGATGATTGTTCAAAACATAAACATCATTGTG

>Bacillus\_Fam\_953\_54\_1 Nr. of seq. 1 Alignment length(with gaps) = 54  
Alignment score = 0.000000  
AGAGAAAGAAAGTGAAGAACTGAATCAAAAAAAGAAGATAAAGCAATTGAATT

>Bacillus\_Fam\_954\_54\_1 Nr. of seq. 1 Alignment length(with gaps) = 54  
Alignment score = 0.000000  
CTGACAGCCCTCCTCAGTGCCCGTTTCTTGGAATAGGAAACCATTTTAGGGCT

>Bacillus\_Fam\_955\_54\_1 Nr. of seq. 1 Alignment length(with gaps) = 54  
Alignment score = 0.000000  
ATGGGGCCAACAGGAGCCACCGATTAGCAGGAGCAACCGGGCCAGCAGGAGTA

>Bacillus\_Fam\_956\_54\_1 Nr. of seq. 1 Alignment length(with gaps) = 54  
Alignment score = 0.000000  
TTTGTCTCTGAGCACGTCTATCAGAGACATTAATTATCCAATTAAGCGAAGA

>Bacillus\_Fam\_957\_54\_1 Nr. of seq. 1 Alignment length(with gaps) = 54  
Alignment score = 0.000000  
TAAGCCAGTAGCGCCAGTAGGCCAGGATCGCCGGTGGCCCCAGTAGCCCCAGC

>Bacillus\_Fam\_958\_54\_1 Nr. of seq. 1 Alignment length(with gaps) = 54  
Alignment score = 0.000000  
CTCAGCCAGCAGCTCGGTTTCTTCTGCAGCCTCTTCGAGTAATTCTGTCTCATT

>Bacillus\_Fam\_959\_54\_1 Nr. of seq. 1 Alignment length(with gaps) = 54  
Alignment score = 0.000000  
AAAGCAGAAGAGCAACAGCGTGAAGCATTGAAGAAACAAGAAGAGGCCCGTAAA

>Bacillus\_Fam\_960\_53\_1 Nr. of seq. 1 Alignment length(with gaps) = 53  
Alignment score = 0.000000  
GGTCGACATGATCGAGGAGAAAATAGAGAAAGAACAGGTCGATGAGTAGCCGA

>Bacillus\_Fam\_961\_53\_1 Nr. of seq. 1 Alignment length(with gaps) = 53  
Alignment score = 0.000000  
ATATGAGTCACTNTGGTGGTGGNGAAAGCCGNACAGAGTGACTCAAGAGGAAG

>Bacillus\_Fam\_962\_53\_1 Nr. of seq. 1 Alignment length(with gaps) = 53  
Alignment score = 0.000000  
GCTTCCTTAACATAGAAGCGCTCTACATTAAGGAAAGGCGAAAATTCGTGACN

>Bacillus\_Fam\_963\_53\_1 Nr. of seq. 1 Alignment length(with gaps) = 53  
Alignment score = 0.000000  
GAATCGGTAGGGTCAAAAGAGCACTTAGACATGGTCTGAATCCAGGTAAGAGAA

>Bacillus\_Fam\_964\_53\_1 Nr. of seq. 1 Alignment length(with gaps) = 53  
Alignment score = 0.000000  
GTAGGTCATAAGGGTCTCAACATGAAAATGAAGCCATGCGCTCGTCCCGCGCG

```

>Bacillus_Fam_965_53_1 Nr. of seq. 1 Alignment length(with gaps) = 53
Alignment score = 0.000000
TCTCAATGGGCTAATTACGTCGTTTACGGGCCAACACCTCATCAAAAAGTCAA
>Bacillus_Fam_966_53_1 Nr. of seq. 1 Alignment length(with gaps) = 53
Alignment score = 0.000000
TACATGAGTTACTTCAGATGGTCCGACTCATGTATGAAAACTNGATCNTTGA
>Bacillus_Fam_967_53_1 Nr. of seq. 1 Alignment length(with gaps) = 53
Alignment score = 0.000000
GTCCCTTTGACGACTCCGATTCTCCCTGACTTCCGATTCCACACCCTCATTGA
>Bacillus_Fam_968_53_1 Nr. of seq. 1 Alignment length(with gaps) = 53
Alignment score = 0.000000
CTAAAGACCAAAACGAATGAAATTCCAGGTGTAAAAGTGTCTTTAGAGACGTT
>Bacillus_Fam_969_53_1 Nr. of seq. 1 Alignment length(with gaps) = 53
Alignment score = 0.000000
AAAGGGTGTAACGGGCCAACGAGAAAGCAGAACCAGAAGGATGCTGGCCCGC
>Bacillus_Fam_970_53_1 Nr. of seq. 1 Alignment length(with gaps) = 53
Alignment score = 0.000000
CATCAAAAGGTGTGGACGGTGAAAATGATGTATGAAAAGAGGGATGATTCCAG
>Bacillus_Fam_971_53_1 Nr. of seq. 1 Alignment length(with gaps) = 53
Alignment score = 0.000000
ACGTTTCTTCTCTAATCGTGCACCTTCACNTCAGATTCCCGCCTTCTAGGGGC
>Bacillus_Fam_972_53_1 Nr. of seq. 1 Alignment length(with gaps) = 53
Alignment score = 0.000000
GTTGTTGAAGGTAAAGTTTAAAGAGCTAAACGTACCCCTTGAGTGCAGATTGA
>Bacillus_Fam_973_53_1 Nr. of seq. 1 Alignment length(with gaps) = 53
Alignment score = 0.000000
GTACATCATTCGAGAGTCAACCAGGAAATGACACCCCGCGGGAGGAGCGCG
>Bacillus_Fam_974_53_1 Nr. of seq. 1 Alignment length(with gaps) = 53
Alignment score = 0.000000
CCAACATCTCGAGGAATTCTGAATCACAATGGTCCGATAACCCCTCTAAACGGA
>Bacillus_Fam_975_53_1 Nr. of seq. 1 Alignment length(with gaps) = 53
Alignment score = 0.000000
GTAAACGTACCACTACAGAAGGNGAATCGGGCTTCTAATGGTACGATTAGCTT
>Bacillus_Fam_976_53_1 Nr. of seq. 1 Alignment length(with gaps) = 53
Alignment score = 0.000000
AAAAGAGAATCGACCCTGTCTGAAGAGGCGTAAAGACCAGGTCTGAATGGTTGCA
>Bacillus_Fam_977_53_1 Nr. of seq. 1 Alignment length(with gaps) = 53
Alignment score = 0.000000
GGCTTCATTTGTGGATTACAGGTGCTTATGACAACACGCGCTCGAGGTGCGCGG
>Bacillus_Fam_978_53_1 Nr. of seq. 1 Alignment length(with gaps) = 53
Alignment score = 0.000000
CATCATTTCTGGGCCGCCGTGAAAAATGATGTAGGAAAAACAATCGGAATTAGGG
>Bacillus_Fam_979_53_1 Nr. of seq. 1 Alignment length(with gaps) = 53
Alignment score = 0.000000
TTGGTACATCAAATCAAGGTGGTCCACGCAATGATGTCCTAATAAAGTCAGAA
>Bacillus_Fam_980_53_1 Nr. of seq. 1 Alignment length(with gaps) = 53
Alignment score = 0.000000
TGGCCCATTTAACCATTTAATGGACCAACACCCTTTAGAGTCGCAACTCTCAT
>Bacillus_Fam_981_53_1 Nr. of seq. 1 Alignment length(with gaps) = 53
Alignment score = 0.000000
GTCATTTTGTGAGAATTGGTCTGAATGACACCCNGCGCCCCGTCCGCGCGGTAG
>Bacillus_Fam_982_53_1 Nr. of seq. 1 Alignment length(with gaps) = 53
Alignment score = 0.000000
CACTGGCCCAATAATCCAATAAATGGGCCAACATGATCTGGTTTTAGCAATCT

```

```

>Bacillus_Fam_983_53_1 Nr. of seq. 1 Alignment length(with gaps) = 53
Alignment score = 0.000000
AAATGATGACATGCGCGGCGNGNGCGCGGGGTGTCATTGTGTTGGATTTGCGG
>Bacillus_Fam_984_53_1 Nr. of seq. 1 Alignment length(with gaps) = 53
Alignment score = 0.000000
GTAATCGACCCAACATCTTCTCCAAAACCCAATCTCCTTGGGCTGTTTACCTC
>Bacillus_Fam_985_53_1 Nr. of seq. 1 Alignment length(with gaps) = 53
Alignment score = 0.000000
ATACCATTTATCGTTGCTCGGCTTCGTGATATTCCGTTTACGCCGTTTGCGGT
>Bacillus_Fam_986_53_1 Nr. of seq. 1 Alignment length(with gaps) = 53
Alignment score = 0.000000
ATGAAGAGGATACACCACGAATGAAAGCTACGAAATCCCCCTTCATGAGAGCTA
>Bacillus_Fam_987_53_1 Nr. of seq. 1 Alignment length(with gaps) = 53
Alignment score = 0.000000
GAGGAAAAGTCAGAAGGAGAAGCTNNGNACGCGTCGGCAGGTTTCAGACTTTAGG
>Bacillus_Fam_988_53_1 Nr. of seq. 1 Alignment length(with gaps) = 53
Alignment score = 0.000000
TTGTCCGAATAANCCTTCTATTTCGGACTANAACCACTTGGTGCTTCNCNTCNC
>Bacillus_Fam_989_53_1 Nr. of seq. 1 Alignment length(with gaps) = 53
Alignment score = 0.000000
TTTGTCTCATGGAGCNTTCATGTTACATGAGTTACTCCCTTTCTTGAGGAAAG
>Bacillus_Fam_990_53_1 Nr. of seq. 1 Alignment length(with gaps) = 53
Alignment score = 0.000000
ATTAGTGACCGTTTTCTNTTGCAACTACAAAAACGGGCATCTANTACACTCG
>Bacillus_Fam_991_53_1 Nr. of seq. 1 Alignment length(with gaps) = 53
Alignment score = 0.000000
ATTATAACGTAAAGGAAACACTCGAATCGTACGCTATACGTACACCGGATGAAA
>Bacillus_Fam_992_53_1 Nr. of seq. 1 Alignment length(with gaps) = 53
Alignment score = 0.000000
CCAGAAATGGTGACCGGAAACAGAGAAAAGTGGCGTCACTAAGGCGAGTGGCG
>Bacillus_Fam_993_53_1 Nr. of seq. 1 Alignment length(with gaps) = 53
Alignment score = 0.000000
AGAGTGCTGCCACTTTTGCCGTTGAGGGATCATCGGAAGTGGCGTCAATCCAC
>Bacillus_Fam_994_53_1 Nr. of seq. 1 Alignment length(with gaps) = 53
Alignment score = 0.000000
TGACGCCACAAAGCTGTTTGCAATATAAGTGAAAGTGGCGCAACTCNCCGGAG
>Bacillus_Fam_995_53_1 Nr. of seq. 1 Alignment length(with gaps) = 53
Alignment score = 0.000000
TGCCACTTTTTGCGTGATGGGTTTGCCAATTGTGGTGTGTCATTGGCCGTAGTGG
>Bacillus_Fam_996_53_1 Nr. of seq. 1 Alignment length(with gaps) = 53
Alignment score = 0.000000
CGGGCTCCTATTTCAACGATTGGCTACCGTTTCCACTCCTTGAGAGCTACGCT
>Bacillus_Fam_997_53_1 Nr. of seq. 1 Alignment length(with gaps) = 53
Alignment score = 0.000000
GTTTTGTCTCAAGACCCCCGATTGAGGACGAATCCTCTGGGGACTCTTGNTA
>Bacillus_Fam_998_53_1 Nr. of seq. 1 Alignment length(with gaps) = 53
Alignment score = 0.000000
AAGAAAGATACCCTTATGCAGCCGTTTGTGCATCACATAAGGGTACGAAAACCG
>Bacillus_Fam_999_53_1 Nr. of seq. 1 Alignment length(with gaps) = 53
Alignment score = 0.000000
TATTGGTTACCTATAATTCTAGTTTCAGCCCTTTTTAGGGCACCAATAACGCC
>Bacillus_Fam_1000_53_1 Nr. of seq. 1 Alignment length(with gaps) = 53
Alignment score = 0.000000
GTACCCTTATGGAGAGCTTTCGCTTGGTATAAGGATACGATTAGGAGAAAATC

```

>Bacillus\_Fam\_1001\_53\_1 Nr. of seq. 1 Alignment length(with gaps) = 53  
Alignment score = 0.000000  
CTTCAGACAAAATCTGCACGCCTAAGACGTGGTTTTGGCCGAACATGGCATCA

>Bacillus\_Fam\_1002\_53\_1 Nr. of seq. 1 Alignment length(with gaps) = 53  
Alignment score = 0.000000  
TATCCTTATGAGGTAAAATCCAGCAACATAAGGGTACCGTTCAAGCCNAATCG

>Bacillus\_Fam\_1003\_53\_1 Nr. of seq. 1 Alignment length(with gaps) = 53  
Alignment score = 0.000000  
CCTAAAAAGAGGAAAATGGTGACCGTCAAAACGAAAGCAATGGTCACCAATCT

>Bacillus\_Fam\_1004\_53\_1 Nr. of seq. 1 Alignment length(with gaps) = 53  
Alignment score = 0.000000  
GTATTGCGACACAAAGCAAGAATTTTCAGCAAGCCGAGTCCGAATANAGCNTC

>Bacillus\_Fam\_1005\_53\_1 Nr. of seq. 1 Alignment length(with gaps) = 53  
Alignment score = 0.000000  
CTTATGAAGACCTTTTCGACGAGCCACGAGTTCTGATTGAGTCTTCATCACG

>Bacillus\_Fam\_1006\_53\_1 Nr. of seq. 1 Alignment length(with gaps) = 53  
Alignment score = 0.000000  
ATGAAAGACAAAACCTCAGGAGAATGGGTGAGGGAATTGTCCTTCATCCGGTGT

>Bacillus\_Fam\_1007\_53\_1 Nr. of seq. 1 Alignment length(with gaps) = 53  
Alignment score = 0.000000  
GATGAAGCCCAAANCCCACTAAGCCCACNCAAGGATATGTNCTTCATAGGCNC

>Bacillus\_Fam\_1008\_53\_1 Nr. of seq. 1 Alignment length(with gaps) = 53  
Alignment score = 0.000000  
GTCAATGAAAGCCTCTTCCATTTACCATGGAGGCCCNATTATTTCTCTTTTCG

>Bacillus\_Fam\_1009\_53\_1 Nr. of seq. 1 Alignment length(with gaps) = 53  
Alignment score = 0.000000  
TATTGGAGCCCATTCTGTTTGAAAACCTTGGGCAAAAGGTATCCAATCGATCCG

>Bacillus\_Fam\_1010\_53\_1 Nr. of seq. 1 Alignment length(with gaps) = 53  
Alignment score = 0.000000  
TTTTTACCGCCTGACCCCTTCTCAGCACTCCGCGGGCAATAGAACCATCTTC

>Bacillus\_Fam\_1011\_53\_1 Nr. of seq. 1 Alignment length(with gaps) = 53  
Alignment score = 0.000000  
TATTGCCCGATTGNGGTGTCCAAGGGGTGCAAACGGTAAAAAGAACAGGCTTC

>Bacillus\_Fam\_1012\_53\_1 Nr. of seq. 1 Alignment length(with gaps) = 53  
Alignment score = 0.000000  
TGTCCATCATCCGTTAGATGAAGGCCATTTTTAGCAGGCAAATCATGGAGTAA

>Bacillus\_Fam\_1013\_53\_1 Nr. of seq. 1 Alignment length(with gaps) = 53  
Alignment score = 0.000000  
TTCTGTCCCGAATCCGTTTCATACGGGACACTAGGGCATAAAAAGTGCAGACGC

>Bacillus\_Fam\_1014\_53\_1 Nr. of seq. 1 Alignment length(with gaps) = 53  
Alignment score = 0.000000  
GTCCTCATCCCTACCATGATAACAATTCCGAACCCTACTTTCTCTCCAAACAT

>Bacillus\_Fam\_1015\_53\_1 Nr. of seq. 1 Alignment length(with gaps) = 53  
Alignment score = 0.000000  
TTGCGGGTTCGCACTTGGAACCTTTCTAGGAGATACCGAACCCGATTCCACCAC

>Bacillus\_Fam\_1016\_53\_1 Nr. of seq. 1 Alignment length(with gaps) = 53  
Alignment score = 0.000000  
AGAAAATAGGTAACAGCGAACCAGTAAAACCATTATAGTGGTATGCAAATGGA

>Bacillus\_Fam\_1017\_52\_1 Nr. of seq. 1 Alignment length(with gaps) = 52  
Alignment score = 0.000000  
TAATCGTGTTAGATACTGTGACCATTGTGGGGAGTAACTGACATGAAAAGGGC

>Bacillus\_Fam\_1018\_52\_1 Nr. of seq. 1 Alignment length(with gaps) = 52  
Alignment score = 0.000000  
TAGCAACATATCGAGTGAAAAGGGCAGAGTTGTTGTAGGAAAAGTCGGGAAG



>Bacillus\_Fam\_1019\_52\_1 Nr. of seq. 1 Alignment length(with gaps) = 52  
 Alignment score = 0.000000  
 GCTTTTGTCCATTTAGAACAGCTAACGGGACAATTCCACCGGAGCTGCCAGC  
 >Bacillus\_Fam\_1020\_52\_1 Nr. of seq. 1 Alignment length(with gaps) = 52  
 Alignment score = 0.000000  
 TGAAGGACATTTTAGGGTTGTGGCGNCTTTGTTTTGTCCTTCATNGGGCGGA  
 >Bacillus\_Fam\_1021\_52\_1 Nr. of seq. 1 Alignment length(with gaps) = 52  
 Alignment score = 0.000000  
 AAAAGCCAAAAGGCACCTGGNNANCGTCCAAACTGTCCTTTAGAACGTCTCA  
 >Bacillus\_Fam\_1022\_52\_1 Nr. of seq. 1 Alignment length(with gaps) = 52  
 Alignment score = 0.000000  
 GCTCTTCTTCTTCTCCTGCTGCCTTTGAGACACGCGCTACCCCTAGCGCGGC  
 >Bacillus\_Fam\_1023\_52\_1 Nr. of seq. 1 Alignment length(with gaps) = 52  
 Alignment score = 0.000000  
 GGCGCGGTGCAGAAAGTAGGTTTGGGCAGGGGTGAGAGCACCGCGCGGGGGT  
 >Bacillus\_Fam\_1024\_52\_1 Nr. of seq. 1 Alignment length(with gaps) = 52  
 Alignment score = 0.000000  
 TTTTGGGCACCGCGCGGACGCGGCGGCGCTCTTCTCACGCTGCAACTCAC  
 >Bacillus\_Fam\_1025\_52\_1 Nr. of seq. 1 Alignment length(with gaps) = 52  
 Alignment score = 0.000000  
 GAGATGTCTTCATCCATGCGATGAGGACCTGTCTACGCACAAATAGGAACGA  
 >Bacillus\_Fam\_1026\_52\_1 Nr. of seq. 1 Alignment length(with gaps) = 52  
 Alignment score = 0.000000  
 AGGTCTTCATACACCTTATGAAGACACTTCCAAGCCTGAAATCCTTCCACTA  
 >Bacillus\_Fam\_1027\_52\_1 Nr. of seq. 1 Alignment length(with gaps) = 52  
 Alignment score = 0.000000  
 GACATCTCTCCACCGGAAATCTTCTCTCACATGTCTTCATTCCGCTTATGAG  
 >Bacillus\_Fam\_1028\_52\_1 Nr. of seq. 1 Alignment length(with gaps) = 52  
 Alignment score = 0.000000  
 GATGAAGACATTCCCATGATGATTTTCCTTTTCCAAAGTGTCTTCATCATGCG  
 >Bacillus\_Fam\_1029\_52\_1 Nr. of seq. 1 Alignment length(with gaps) = 52  
 Alignment score = 0.000000  
 CAACATTGTCTCGTAGGTAGCGTACGACTCCCTGAGAAGGTGAAAACCCGC  
 >Bacillus\_Fam\_1030\_52\_1 Nr. of seq. 1 Alignment length(with gaps) = 52  
 Alignment score = 0.000000  
 AACGAGGACAATGTTGACGTGATTTTCGGGGTTACCGGGTTTCATAGGAGTTC  
 >Bacillus\_Fam\_1031\_52\_1 Nr. of seq. 1 Alignment length(with gaps) = 52  
 Alignment score = 0.000000  
 TGTTTTGGTAAGATAGAGGGGTTCTATACGCCCCGAAGCAGCATGGTAAAAGGC  
 >Bacillus\_Fam\_1032\_52\_1 Nr. of seq. 1 Alignment length(with gaps) = 52  
 Alignment score = 0.000000  
 GCTTCTATACTACCGAAGACCTCGGGATTCTACCGTTCGGGCGTATAGAAC  
 >Bacillus\_Fam\_1033\_52\_1 Nr. of seq. 1 Alignment length(with gaps) = 52  
 Alignment score = 0.000000  
 AGGTAGTCATACGCTTTGAACGAGGACAATGTTTTTACACTTTTCAGTGGGGA  
 >Bacillus\_Fam\_1034\_52\_1 Nr. of seq. 1 Alignment length(with gaps) = 52  
 Alignment score = 0.000000  
 CTATACGACCGAAGCTACTTATCAAGCTCCCCCTTCCGTCTTATAGAACCCCT  
 >Bacillus\_Fam\_1035\_52\_1 Nr. of seq. 1 Alignment length(with gaps) = 52  
 Alignment score = 0.000000  
 GACCGAAGCAACCCCTATTACCTCGAAACGTCGTATAGAACGCTTCTATAC  
 >Bacillus\_Fam\_1036\_52\_1 Nr. of seq. 1 Alignment length(with gaps) = 52  
 Alignment score = 0.000000  
 CCCGTTAGAGCAGGATTCAATAACTAAGTGTCGATTAAACAGGGTTTAAAT

```

>Bacillus_Fam_1037_52_1 Nr. of seq. 1 Alignment length(with gaps) = 52
Alignment score = 0.000000
GTGTCATAGCACTCGTATGACGCATCTTATATTGAATCTCTAGCTATGTNGT
>Bacillus_Fam_1038_52_1 Nr. of seq. 1 Alignment length(with gaps) = 52
Alignment score = 0.000000
TAGTCTGAGTGGATATAAAACACGAAATAAAATCTCGTTGTGATGGTGAGTC
>Bacillus_Fam_1039_52_1 Nr. of seq. 1 Alignment length(with gaps) = 52
Alignment score = 0.000000
CCCGTTAGAATGATTATCCCGTGCTGAAGGTAGATAAAACAGCGTTTAAAAG
>Bacillus_Fam_1040_52_1 Nr. of seq. 1 Alignment length(with gaps) = 52
Alignment score = 0.000000
TGCGAGTGGACTTTAAAGTGCCTATAAAATCCCATGAGGTAGAGGGAGCATG
>Bacillus_Fam_1041_52_1 Nr. of seq. 1 Alignment length(with gaps) = 52
Alignment score = 0.000000
TTTTCCGTTTCAGTGGATCCTCTCTTCCTTGAACGGAATTCTTTGTCATTTTC
>Bacillus_Fam_1042_52_1 Nr. of seq. 1 Alignment length(with gaps) = 52
Alignment score = 0.000000
TTGCTTTCCTTTCTAAGGCACTCAGCTTCCTGGAAGGAATACTAAGCCACT
>Bacillus_Fam_1043_52_1 Nr. of seq. 1 Alignment length(with gaps) = 52
Alignment score = 0.000000
AATGGGTGCTATTTTGTTCGTCGCTTTTGCCTGCGTTGTTTTCTGCTCG
>Bacillus_Fam_1044_52_1 Nr. of seq. 1 Alignment length(with gaps) = 52
Alignment score = 0.000000
AAGGAATGGGCGCTATTCTTATTTGCTGGCCTTTACCTCTGATTTTGTGA
>Bacillus_Fam_1045_52_1 Nr. of seq. 1 Alignment length(with gaps) = 52
Alignment score = 0.000000
CTTTCCTCGGATAGTTTTCTTTTCAGAGACTTTTCTCTTTGAACGGAACG
>Bacillus_Fam_1046_52_1 Nr. of seq. 1 Alignment length(with gaps) = 52
Alignment score = 0.000000
TTCCTTCTACTAGTAAATCAGCCATGAAAGGAATACTAAACGCCTTCACT
>Bacillus_Fam_1047_52_1 Nr. of seq. 1 Alignment length(with gaps) = 52
Alignment score = 0.000000
TAAAGGAATACTAAGCACTCTGGCTTTCCTTCTACGTCGATTCCCTCGTCC
>Bacillus_Fam_1048_52_1 Nr. of seq. 1 Alignment length(with gaps) = 52
Alignment score = 0.000000
GTTGTCGATTAGGATTATGAAAAATCGATGGTGCCAAAAGGTGCGAATGGG
>Bacillus_Fam_1049_52_1 Nr. of seq. 1 Alignment length(with gaps) = 52
Alignment score = 0.000000
CCCCGTCAAAGAGAGGGTATGAGGGTGTGCAATTGAATTTTGGTTGAATCGG
>Bacillus_Fam_1050_52_1 Nr. of seq. 1 Alignment length(with gaps) = 52
Alignment score = 0.000000
GAAACGTACCAATATAGAGTCAGAATCCTGCTGTAGTGGTAAGATTGAGAA
>Bacillus_Fam_1051_52_1 Nr. of seq. 1 Alignment length(with gaps) = 52
Alignment score = 0.000000
AGGAATGATGTAGGAATGCAGGGGTAATTAGAGCATCAAATCGGAGAAGTGA
>Bacillus_Fam_1052_52_1 Nr. of seq. 1 Alignment length(with gaps) = 52
Alignment score = 0.000000
GGGTGCTCATGAACGCTTCATGGGGCCATTTGCCTGCATATTTGAAGTTA
>Bacillus_Fam_1053_52_1 Nr. of seq. 1 Alignment length(with gaps) = 52
Alignment score = 0.000000
GGTGGTCAATCCCAAAAAAAGAGAATCGGCCCCGTCAAAGTGCTGCTTCGA
>Bacillus_Fam_1054_52_1 Nr. of seq. 1 Alignment length(with gaps) = 52
Alignment score = 0.000000
GGTGGAATTTAGTTTGGAGAAATCGGCATGGTCAAAGCGGGCGAAAGACAG

```

```

>Bacillus_Fam_1055_52_1 Nr. of seq. 1 Alignment length(with gaps) = 52
Alignment score = 0.000000
CTCAACCAGAGTCCGAAGTTGTACTAGGTTCGGACTCAAATTCAGGATGAG
>Bacillus_Fam_1056_52_1 Nr. of seq. 1 Alignment length(with gaps) = 52
Alignment score = 0.000000
ATGAAGCCGAAAAGTCGTGNAGCGATAAGAAAACGGTCGCCATGAGGCAGTC
>Bacillus_Fam_1057_52_1 Nr. of seq. 1 Alignment length(with gaps) = 52
Alignment score = 0.000000
GACGAAAATTCAGTGGCTCACCAANAAATGGTCGACATAGAGCCTTCATGAA
>Bacillus_Fam_1058_52_1 Nr. of seq. 1 Alignment length(with gaps) = 52
Alignment score = 0.000000
TCACAGACAATTCATTCAACTTTTTACTNCGNTTGTCTTCGAGACTGGCTA
>Bacillus_Fam_1059_52_1 Nr. of seq. 1 Alignment length(with gaps) = 52
Alignment score = 0.000000
TATGAAGGACTTTCTCACC GCCAGGCTGCTCGTTTCGAGGCTTCATCGGCCT
>Bacillus_Fam_1060_52_1 Nr. of seq. 1 Alignment length(with gaps) = 52
Alignment score = 0.000000
TCAGTTTCTCAGACCNAATCCCCTTCATAGACCACTTGAAGAGGATACACCT
>Bacillus_Fam_1061_52_1 Nr. of seq. 1 Alignment length(with gaps) = 52
Alignment score = 0.000000
CCTCGGCATACTCCGGTTTGTCTTGTCTCCGAGAGCAGCTATCAAACACTTT
>Bacillus_Fam_1062_52_1 Nr. of seq. 1 Alignment length(with gaps) = 52
Alignment score = 0.000000
TTCATTGCCTCGATGAAGAGCATAACGCAACAGAACTATGCTCGAATTCCTC
>Bacillus_Fam_1063_52_1 Nr. of seq. 1 Alignment length(with gaps) = 52
Alignment score = 0.000000
TTGGACATTCTGACTACCTCCACTTTCTCCTTTGTCTTTAAACTTGGGATA
>Bacillus_Fam_1064_52_1 Nr. of seq. 1 Alignment length(with gaps) = 52
Alignment score = 0.000000
TACATGTTTTGGCTGGTTGCTGACCATTATTTGGGTGCCATACTCATTTGGG
>Bacillus_Fam_1065_52_1 Nr. of seq. 1 Alignment length(with gaps) = 52
Alignment score = 0.000000
TAATTCGTAATGTAATTTCCCACTATGNACTAATTACGGTGCGTATAACCCC
>Bacillus_Fam_1066_52_1 Nr. of seq. 1 Alignment length(with gaps) = 52
Alignment score = 0.000000
GTTTCGGACAGGAGAAGAGGAAAAACCGTGATTGAGTCCGAAGTCGCCCTAT
>Bacillus_Fam_1067_52_1 Nr. of seq. 1 Alignment length(with gaps) = 52
Alignment score = 0.000000
TTCGGACAGACTCTGGACTTTTTCTGCCTTGCCTGTCCGAACCTTGCCCCAGG
>Bacillus_Fam_1068_52_1 Nr. of seq. 1 Alignment length(with gaps) = 52
Alignment score = 0.000000
TTTATCCTCACCAAACCGAGCCTAGATGAGGTTTGATAGTAAATAACTCGTG
>Bacillus_Fam_1069_52_1 Nr. of seq. 1 Alignment length(with gaps) = 52
Alignment score = 0.000000
TTTGGTGAGGATAAAAGCAGGTTATCTACTACCAAAGTAAGTAGAGTGGAA
>Bacillus_Fam_1070_52_1 Nr. of seq. 1 Alignment length(with gaps) = 52
Alignment score = 0.000000
AAAATCTAGCGGACTGTCCTTAATAGGCGCTGTTGAGGACAAAACGGGGTTG
>Bacillus_Fam_1071_52_1 Nr. of seq. 1 Alignment length(with gaps) = 52
Alignment score = 0.000000
TCTGTCCGAATGCACCTCTTATTCGGACTCCTTCACCTCTCTACTACCTTT
>Bacillus_Fam_1072_52_1 Nr. of seq. 1 Alignment length(with gaps) = 52
Alignment score = 0.000000
ATTCGGACAAGCCTATGGCTTCTTGCTTCCTACTTGTCCGAATATCCTTCCG

```

>Bacillus\_Fam\_1073\_52\_1 Nr. of seq. 1 Alignment length(with gaps) = 52  
Alignment score = 0.000000  
TGTCCGAACTAGGCTTAAGTTCCGACAGAAATGACCGCTTTTTCTCAAATGG

>Bacillus\_Fam\_1074\_52\_1 Nr. of seq. 1 Alignment length(with gaps) = 52  
Alignment score = 0.000000  
ATTGCGTTGCTCTCGATCAAGAAATGGACTTCATAGCCGAGGTAACGATCGT

>Bacillus\_Fam\_1075\_52\_1 Nr. of seq. 1 Alignment length(with gaps) = 52  
Alignment score = 0.000000  
CGTTCATAAGGCGGATGAAAGCCATTGTAAAGAGAAAAACAGGTGAGAAGG

>Bacillus\_Fam\_1076\_52\_1 Nr. of seq. 1 Alignment length(with gaps) = 52  
Alignment score = 0.000000  
AATGGCGTTCATCAGCCGTATGAACGCTATCTCTACCGGGGTTGATCCTTGA

>Bacillus\_Fam\_1077\_52\_1 Nr. of seq. 1 Alignment length(with gaps) = 52  
Alignment score = 0.000000  
CGGGCTTTCATATCCCCAATGAACGACCGTTTCCCCGGGCACTTGCCCTGATT

>Bacillus\_Fam\_1078\_52\_1 Nr. of seq. 1 Alignment length(with gaps) = 52  
Alignment score = 0.000000  
GCGAAATGAAGTTCATCAGGCCTATGAAAGCAATCGCGGCCGAAATTTTAGA

>Bacillus\_Fam\_1079\_52\_1 Nr. of seq. 1 Alignment length(with gaps) = 52  
Alignment score = 0.000000  
GGGCTTTCATTCGACCGATGATCGACCGCGCGGATGGTTTTTCTCTCGCGT

>Bacillus\_Fam\_1080\_52\_1 Nr. of seq. 1 Alignment length(with gaps) = 52  
Alignment score = 0.000000  
ATGAACGCGATCACGAATGAAAAAGGGGGTTACGATGGTGTTCATAAGNCCG

>Bacillus\_Fam\_1081\_52\_1 Nr. of seq. 1 Alignment length(with gaps) = 52  
Alignment score = 0.000000  
ATAGCGTTCATCCCGGGTATGAAGTTCATCTTGANTATCTTTTTTACTTGNA

>Bacillus\_Fam\_1082\_52\_1 Nr. of seq. 1 Alignment length(with gaps) = 52  
Alignment score = 0.000000  
GCTTATGAAGTGCATTTGGCATGGATTTTTTTACCGAGATAGCGTTCATTCC

>Bacillus\_Fam\_1083\_52\_1 Nr. of seq. 1 Alignment length(with gaps) = 52  
Alignment score = 0.000000  
CGGGCACTTTTAGCCTCTATTAGTGACCGGTTCTCTCGACAACTCTATTTG

>Bacillus\_Fam\_1084\_52\_1 Nr. of seq. 1 Alignment length(with gaps) = 52  
Alignment score = 0.000000  
AATCGGTAACTAATAGGCAGGAAAGATGCCCGAATCCGNTGTGTGTCGCCGC

>Bacillus\_Fam\_1085\_52\_1 Nr. of seq. 1 Alignment length(with gaps) = 52  
Alignment score = 0.000000  
CGTATATCCCAAAAAGCGGTCACCAATCGTATGGATTAGTGCCCGTTCTGAG

>Bacillus\_Fam\_1086\_52\_1 Nr. of seq. 1 Alignment length(with gaps) = 52  
Alignment score = 0.000000  
AAAAGCGGTCACGATTAGTGAGGAAAGATGCCCGTTTTAGTCGGTTTTTCAGT

>Bacillus\_Fam\_1087\_52\_1 Nr. of seq. 1 Alignment length(with gaps) = 52  
Alignment score = 0.000000  
TATTTGTGACCGGATTTTCGTATTTCTCCCTTCAAACGGGCATCTTCCACTAC

>Bacillus\_Fam\_1088\_52\_1 Nr. of seq. 1 Alignment length(with gaps) = 52  
Alignment score = 0.000000  
TCACTAAAAAGTGCTAAAAGTGCCCGTAATGTGGTGAATCACGAAAATCCGG

>Bacillus\_Fam\_1089\_52\_1 Nr. of seq. 1 Alignment length(with gaps) = 52  
Alignment score = 0.000000  
ACCGCTTTTACCAAAATCTCTCGTAACGGGCACCTTTCTCCAACATTAGTG

>Bacillus\_Fam\_1090\_52\_1 Nr. of seq. 1 Alignment length(with gaps) = 52  
Alignment score = 0.000000  
ACCAATAAAGGTTAATAGTGCCCGAAAAGGAGAAAAAAGTGCTCTAATGGTC

>Bacillus\_Fam\_1091\_52\_1 Nr. of seq. 1 Alignment length(with gaps) = 52  
 Alignment score = 0.000000  
 GATTAGTGACCGNTTTTTCGGATTAACGCAACTTTTCGGGCATCTTTTACTCC  
 >Bacillus\_Fam\_1092\_52\_1 Nr. of seq. 1 Alignment length(with gaps) = 52  
 Alignment score = 0.000000  
 GTTCATCTTGTTTATGAACGATAGTTTTGCCCCTCTTCTTTTGAAAAAGTGGC  
 >Bacillus\_Fam\_1093\_52\_1 Nr. of seq. 1 Alignment length(with gaps) = 52  
 Alignment score = 0.000000  
 TGGCTTTCATTCCCTTGATGAACGCCACTTTCCTCCAAGATTACCTTAAAAC  
 >Bacillus\_Fam\_1094\_52\_1 Nr. of seq. 1 Alignment length(with gaps) = 52  
 Alignment score = 0.000000  
 TGTCCGAAGTGGGTCTGTGTTTCGGACAACCTTCCGGATGAATCCAAGCCAACCT  
 >Bacillus\_Fam\_1095\_52\_1 Nr. of seq. 1 Alignment length(with gaps) = 52  
 Alignment score = 0.000000  
 TCTCTGAACCATTTNCCAGCGGAGCAGCCTCNGTTTTGGTCTTGAGACGCCT  
 >Bacillus\_Fam\_1096\_52\_1 Nr. of seq. 1 Alignment length(with gaps) = 52  
 Alignment score = 0.000000  
 TCTCATGACCAAAACTTCTGCCGCTTCCCCTCTTTATGGTTCTGAGACGCAC  
 >Bacillus\_Fam\_1097\_52\_1 Nr. of seq. 1 Alignment length(with gaps) = 52  
 Alignment score = 0.000000  
 CCTCTCAAGACCAAAATTCCTTTAAGCAAGCGGAGAAGTGGTTCAGAGAGGG  
 >Bacillus\_Fam\_1098\_52\_1 Nr. of seq. 1 Alignment length(with gaps) = 52  
 Alignment score = 0.000000  
 GGATGACGAAGATAGGTCAATGAGAAGGGTTCTAATGGACACTACGCTGAAN  
 >Bacillus\_Fam\_1099\_52\_1 Nr. of seq. 1 Alignment length(with gaps) = 52  
 Alignment score = 0.000000  
 TCAGGACCAAAAACAAAGACAGAGCTGGTGAAAGTGGTTCAGAGGGGGCGTC  
 >Bacillus\_Fam\_1100\_52\_1 Nr. of seq. 1 Alignment length(with gaps) = 52  
 Alignment score = 0.000000  
 GGGTCTTAGTTTCTCTGACTAGCACCTCTGGTTTGGTTTTGTGATTCAGA  
 >Bacillus\_Fam\_1101\_52\_1 Nr. of seq. 1 Alignment length(with gaps) = 52  
 Alignment score = 0.000000  
 CGATAAGCTACCCAACTGGTTCTTTCTTGATGGATTCGGTCGCTTATAANCC  
 >Bacillus\_Fam\_1102\_52\_1 Nr. of seq. 1 Alignment length(with gaps) = 52  
 Alignment score = 0.000000  
 GGGCACTCTGGCTACTCCACAGTGCCCGGTTGATGCTTTTTTCTCCTCACAT  
 >Bacillus\_Fam\_1103\_52\_1 Nr. of seq. 1 Alignment length(with gaps) = 52  
 Alignment score = 0.000000  
 CGGTCATTAAGCGGGGCTCTAAATGCCCGCGGAGAGCGAAAAAGGAAGGGAG  
 >Bacillus\_Fam\_1104\_52\_1 Nr. of seq. 1 Alignment length(with gaps) = 52  
 Alignment score = 0.000000  
 TCTTAGTTACCGCGAGACCCGCATTTTCTCCTTCGCGGGCATTTAGAGCCCT  
 >Bacillus\_Fam\_1105\_52\_1 Nr. of seq. 1 Alignment length(with gaps) = 52  
 Alignment score = 0.000000  
 TTATAGCCTTTATAAATGACCGACCGACCGGAAAAANCGCCAGCTCGGGCAT  
 >Bacillus\_Fam\_1106\_52\_1 Nr. of seq. 1 Alignment length(with gaps) = 52  
 Alignment score = 0.000000  
 AACCAAGTAAGTGTTCTATACCGTCAATAGCAACACTTTCCTCATCAATTG  
 >Bacillus\_Fam\_1107\_52\_1 Nr. of seq. 1 Alignment length(with gaps) = 52  
 Alignment score = 0.000000  
 TCGTTTAAGAGCACTTTGGTCTTGCTGTGAATCGGAGTTCTTGTTGCAAACA  
 >Bacillus\_Fam\_1108\_52\_1 Nr. of seq. 1 Alignment length(with gaps) = 52  
 Alignment score = 0.000000  
 TATTACGCCGCAACCAATTTATAGGGTTGCATTTGCCAGTATGGTACCCTC

>Bacillus\_Fam\_1109\_52\_1 Nr. of seq. 1 Alignment length(with gaps) = 52  
Alignment score = 0.000000  
TAGAACACTTTCTGCGGTCGGGATNCCNACTTAATGTTGCTTACTCCGGTT

>Bacillus\_Fam\_1110\_52\_1 Nr. of seq. 1 Alignment length(with gaps) = 52  
Alignment score = 0.000000  
CAAAATGTTGCTAAAGCCAGGTTAGAACACTTTCNGGGCTTCTGGCCTCTG

>Bacillus\_Fam\_1111\_52\_1 Nr. of seq. 1 Alignment length(with gaps) = 52  
Alignment score = 0.000000  
CTGAAGGGCACATTCTGCCTGGTTTTTCGACCTTCAGCTTACTTCCTTTTCC

>Bacillus\_Fam\_1112\_52\_1 Nr. of seq. 1 Alignment length(with gaps) = 52  
Alignment score = 0.000000  
ACCTTCACACAATCCCACTCCTGATAAACGGTCATATCTTATCCACTTATA

>Bacillus\_Fam\_1113\_52\_1 Nr. of seq. 1 Alignment length(with gaps) = 52  
Alignment score = 0.000000  
ACCTTCAGCTTCTTCTCCACCACTGAAGGGCACGATCCATCCGCTTTTGTG

>Bacillus\_Fam\_1114\_52\_1 Nr. of seq. 1 Alignment length(with gaps) = 52  
Alignment score = 0.000000  
TAAGTGCCTTATCTCGGTTTTAGAACACTTTCACAGATANTGCNCTTTGGC

>Bacillus\_Fam\_1115\_52\_1 Nr. of seq. 1 Alignment length(with gaps) = 52  
Alignment score = 0.000000  
GCTGCGGCGAAAGGCATGAAGGGTCATAAGAGGCTTGATTGTTACCTTCA

>Bacillus\_Fam\_1116\_52\_1 Nr. of seq. 1 Alignment length(with gaps) = 52  
Alignment score = 0.000000  
TTTCTCCAGGCTCACGCTCCACTTTGTGCTCTTAACCCCGCGGAAGCGCAC

>Bacillus\_Fam\_1117\_52\_1 Nr. of seq. 1 Alignment length(with gaps) = 52  
Alignment score = 0.000000  
GAAATATAGGGCAGCAAAACATGAAAATGCAACCCTATAAAATGCGCCATCT

>Bacillus\_Fam\_1118\_52\_1 Nr. of seq. 1 Alignment length(with gaps) = 52  
Alignment score = 0.000000  
CTGTATTTTGGACAAGCNGATTTATAGGGCAGCATTTACCTTTTTTGGTGCC

>Bacillus\_Fam\_1119\_52\_1 Nr. of seq. 1 Alignment length(with gaps) = 52  
Alignment score = 0.000000  
CATAAGTGCTGCAAAGCTGGTTTAAACAACATAAACTCAGCTGCAGGAAGCCG

>Bacillus\_Fam\_1120\_52\_1 Nr. of seq. 1 Alignment length(with gaps) = 52  
Alignment score = 0.000000  
TTCTTATCGGACGAATNGGTGCCATCAAANCTGATTCTTCTCTGCTTGAGGG

>Bacillus\_Fam\_1121\_52\_1 Nr. of seq. 1 Alignment length(with gaps) = 52  
Alignment score = 0.000000  
GAACCCTCAAGCTTTGGATTCTGTGGATTGATGGCACTTATAGCAGAGTTTA

>Bacillus\_Fam\_1122\_52\_1 Nr. of seq. 1 Alignment length(with gaps) = 52  
Alignment score = 0.000000  
AAGTGTCTTATCTTGCTTTTACAGCACTTATCTTCGCTCCGGAGTCACTCA

>Bacillus\_Fam\_1123\_52\_1 Nr. of seq. 1 Alignment length(with gaps) = 52  
Alignment score = 0.000000  
AGCGGGTAAAATAAAGCGCCGTTTTTTACCGGTGATAGCCTTTTTTCGCTCC

>Bacillus\_Fam\_1124\_52\_1 Nr. of seq. 1 Alignment length(with gaps) = 52  
Alignment score = 0.000000  
CGCTTATACCTTTTATTGGTGACCGAACCAGTGTCAAACCCATGGTTCCGGG

>Bacillus\_Fam\_1125\_52\_1 Nr. of seq. 1 Alignment length(with gaps) = 52  
Alignment score = 0.000000  
TTATTGGCGACCGCTCACTACTGGAGNTCCTTCGCTCGGGCGCTTATCTCCC

>Bacillus\_Fam\_1126\_52\_1 Nr. of seq. 1 Alignment length(with gaps) = 52  
Alignment score = 0.000000  
GACCTTTTCAACCTTTTTCACCACAATTTCGGGCGTCTACAACTCTTCTAGAG

>Bacillus\_Fam\_1127\_52\_1 Nr. of seq. 1 Alignment length(with gaps) = 52  
 Alignment score = 0.000000  
 AGGGTTCTCAAGGACAAAGTGCACGCAAAAACCGGTGAAACTGTCCTAGACA  
 >Bacillus\_Fam\_1128\_52\_1 Nr. of seq. 1 Alignment length(with gaps) = 52  
 Alignment score = 0.000000  
 TCTTAAGGACAAATCTTCTAGTTCTCTTTAGAGATTTGTCCTTCATACCCCT  
 >Bacillus\_Fam\_1129\_52\_1 Nr. of seq. 1 Alignment length(with gaps) = 52  
 Alignment score = 0.000000  
 GTAACGATTAGTCGCTAATCGTGCCCTTCTCCTCGATTTTTTGGAGTTTGCG  
 >Bacillus\_Fam\_1130\_52\_1 Nr. of seq. 1 Alignment length(with gaps) = 52  
 Alignment score = 0.000000  
 TATGAGTGACCGCTTGTCTTTTTCCAGGAGGTTCTTGGGCTCTCATGAACCT  
 >Bacillus\_Fam\_1131\_52\_1 Nr. of seq. 1 Alignment length(with gaps) = 52  
 Alignment score = 0.000000  
 TGTGACCAAACTCATGGATGAACTATCAAAATGGTCACAAGAAGGGTCGC  
 >Bacillus\_Fam\_1132\_52\_1 Nr. of seq. 1 Alignment length(with gaps) = 52  
 Alignment score = 0.000000  
 CTTGCTCTTTTTCGGTAGGCAATACATCTTGTGTCTACTCTTATTGCGGCT  
 >Bacillus\_Fam\_1133\_52\_1 Nr. of seq. 1 Alignment length(with gaps) = 52  
 Alignment score = 0.000000  
 CTACCCAAATACGGGGACCTCTCAAGTTCGGGCGCCATCACATCCCTTTGA  
 >Bacillus\_Fam\_1134\_52\_1 Nr. of seq. 1 Alignment length(with gaps) = 52  
 Alignment score = 0.000000  
 CTCCTTTTCGGTAGCCATTCCACCCCTTTGACTCCCTTCCTCACNCCTCCTCA  
 >Bacillus\_Fam\_1135\_52\_1 Nr. of seq. 1 Alignment length(with gaps) = 52  
 Alignment score = 0.000000  
 TTCGCTTCTCTTCGGGAGTCAACACCCTCCTTTAGCTACCGTTCTCTTTGTC  
 >Bacillus\_Fam\_1136\_52\_1 Nr. of seq. 1 Alignment length(with gaps) = 52  
 Alignment score = 0.000000  
 ACATTTCGGGCTCCAGATCCCTCTTCTGCTTCCCTACTTTTCCCATTCCCACC  
 >Bacillus\_Fam\_1137\_52\_1 Nr. of seq. 1 Alignment length(with gaps) = 52  
 Alignment score = 0.000000  
 ACGGGAGCCATTCCCTTCCTTTGACTACCCAAATCCNGTTCGGTCCTTCTGC  
 >Bacillus\_Fam\_1138\_52\_1 Nr. of seq. 1 Alignment length(with gaps) = 52  
 Alignment score = 0.000000  
 TCGTTGACTACCCAAATTTGTGATNGACTCAGAGTTCGAGTGCCANTGNGCT  
 >Bacillus\_Fam\_1139\_52\_1 Nr. of seq. 1 Alignment length(with gaps) = 52  
 Alignment score = 0.000000  
 AGTCAATACACCTTATTGGCTACCGTCCACTCCTCCTCCCTCGCTTTTCGGG  
 >Bacillus\_Fam\_1140\_52\_1 Nr. of seq. 1 Alignment length(with gaps) = 52  
 Alignment score = 0.000000  
 TTTCGGTAGTCAACCCTTCTCTTTGTCTACCAAAATCCTCGCCCTCTCCCTT  
 >Bacillus\_Fam\_1141\_52\_1 Nr. of seq. 1 Alignment length(with gaps) = 52  
 Alignment score = 0.000000  
 TAGACATTTTGTAGTCAATTGGCATTGCGAAATGTACATTAAACAAGGTTTTT  
 >Bacillus\_Fam\_1142\_52\_1 Nr. of seq. 1 Alignment length(with gaps) = 52  
 Alignment score = 0.000000  
 TCATTTGGGTAAAGAGGAAAGCCCCTGCATTGCCCCGAAAAAGCGCCAACTCCA  
 >Bacillus\_Fam\_1143\_52\_1 Nr. of seq. 1 Alignment length(with gaps) = 52  
 Alignment score = 0.000000  
 GATGACGGACACTTTCCAGCGTTTTTGGGCTATTTCTGTCCGTCATAGGCTG  
 >Bacillus\_Fam\_1144\_52\_1 Nr. of seq. 1 Alignment length(with gaps) = 52  
 Alignment score = 0.000000  
 AAAAAAGGTAAAAGGAAAGGCTCTGCATTACCCGAAAAATGCTGGAGAGAAGT

>Bacillus\_Fam\_1145\_52\_1 Nr. of seq. 1 Alignment length(with gaps) = 52  
Alignment score = 0.000000  
TGTCCATTAAATGCACTTTCTTAGACATTTTCGGTTTGGAACTCATGCTGAAA

>Bacillus\_Fam\_1146\_52\_1 Nr. of seq. 1 Alignment length(with gaps) = 52  
Alignment score = 0.000000  
TTTTGTCCGAACCTGCCCCCTACTTCAGACAATTTCCGCTTGTACGGCCGAGA

>Bacillus\_Fam\_1147\_52\_1 Nr. of seq. 1 Alignment length(with gaps) = 52  
Alignment score = 0.000000  
TTAATAGACATTTTTCAGTCCGTTACTCTTCGAAATGTCTAAGAAGTGCTGT

>Bacillus\_Fam\_1148\_52\_1 Nr. of seq. 1 Alignment length(with gaps) = 52  
Alignment score = 0.000000  
AAACAGGTCACCAATACCCNTGATTGGTGACCTAAAAATCCATATTTCCGNA

>Bacillus\_Fam\_1149\_52\_1 Nr. of seq. 1 Alignment length(with gaps) = 52  
Alignment score = 0.000000  
GTTCCGACATTTCAACGGCCTCTTCATTGAGTTTTGTCCGAAGTAGGATCAA

>Bacillus\_Fam\_1150\_52\_1 Nr. of seq. 1 Alignment length(with gaps) = 52  
Alignment score = 0.000000  
GAAAAGCTGTCAAGATTATCCCGAATTATGACAGGCTCAAGCCCATAAAGC

>Bacillus\_Fam\_1151\_52\_1 Nr. of seq. 1 Alignment length(with gaps) = 52  
Alignment score = 0.000000  
GTTCCGACAAATCATCGGGAGTGACGGTACTTTTTGTCCGAAGGTGACCCAT

>Bacillus\_Fam\_1152\_52\_1 Nr. of seq. 1 Alignment length(with gaps) = 52  
Alignment score = 0.000000  
TCCCTCATCCGGGCACATATTTCCCTTTATGTGCCCCGTCTCCCTTCATCT

>Bacillus\_Fam\_1153\_52\_1 Nr. of seq. 1 Alignment length(with gaps) = 52  
Alignment score = 0.000000  
TATGAAGGACATTTTGGGGGCGNGGGATTCTCCTTTTGTCTTTCATCCCTGT

>Bacillus\_Fam\_1154\_52\_1 Nr. of seq. 1 Alignment length(with gaps) = 52  
Alignment score = 0.000000  
TTATTTTGACAACTTTCAGGTGAAAAGGGCAAAAGTTGTCAAGAAAGAGAGG

>Bacillus\_Fam\_1155\_52\_1 Nr. of seq. 1 Alignment length(with gaps) = 52  
Alignment score = 0.000000  
TGATAGGCGCCCGTGGCGGTTGAAAATAGGAGTTGGCGGTCGCCAATAGGGT

>Bacillus\_Fam\_1156\_52\_1 Nr. of seq. 1 Alignment length(with gaps) = 52  
Alignment score = 0.000000  
GGGCACTGAGAACACCTGTGAGCACCCAAAATCCCTGGCCCCCTCTAAAAAT

>Bacillus\_Fam\_1157\_52\_1 Nr. of seq. 1 Alignment length(with gaps) = 52  
Alignment score = 0.000000  
TGTCAGTGCCCCAAAAGTGGAGCAGNTCGTNAAAAAGGTTACTGAGGGTCGN

>Bacillus\_Fam\_1158\_52\_1 Nr. of seq. 1 Alignment length(with gaps) = 52  
Alignment score = 0.000000  
CCTCTTTTTTCGGTAAACTCTCGGAAAAAGGTACCTGACAGGCTGCCTCAGTA

>Bacillus\_Fam\_1159\_52\_1 Nr. of seq. 1 Alignment length(with gaps) = 52  
Alignment score = 0.000000  
TTGGTCGTCCATACACCCGATGGAGGCCCGTTTTTCAGAATCAGCTTCAGTA

>Bacillus\_Fam\_1160\_52\_1 Nr. of seq. 1 Alignment length(with gaps) = 52  
Alignment score = 0.000000  
GGGCTTCCATCCACTTGATGGAGGACCTTTTTTGCGGCTTTCCTGCGAAAAC

>Bacillus\_Fam\_1161\_52\_1 Nr. of seq. 1 Alignment length(with gaps) = 52  
Alignment score = 0.000000  
TTTTTTGGTGGTTTGCATGAATTTGGGTACTGAGGAGGAGTNTCAGAGCCC

>Bacillus\_Fam\_1162\_52\_1 Nr. of seq. 1 Alignment length(with gaps) = 52  
Alignment score = 0.000000  
GTCCTTCATCCAGGGTCTGAAGGACATAACAACACTAGTGATCACGTGAATT



>Bacillus\_Fam\_1163\_52\_1 Nr. of seq. 1 Alignment length(with gaps) = 52  
 Alignment score = 0.000000  
 TAGTCCGAAGGCAGGTCAAGTTCGGACAGAAAGCAGACATCAAAGCGCAAAC  
 >Bacillus\_Fam\_1164\_52\_1 Nr. of seq. 1 Alignment length(with gaps) = 52  
 Alignment score = 0.000000  
 TTCGGCCAAATCAGGAGCGNCGAGCCGTTGAAATGTCCGAAGTTGGTGTAGG  
 >Bacillus\_Fam\_1165\_52\_1 Nr. of seq. 1 Alignment length(with gaps) = 52  
 Alignment score = 0.000000  
 CATTTTTCAGGGCTATGGTCTATGACAGACGTTATCATGACCCGTTGGCTG  
 >Bacillus\_Fam\_1166\_52\_1 Nr. of seq. 1 Alignment length(with gaps) = 52  
 Alignment score = 0.000000  
 CTCTCATGGACCTTTCGCATGTAAAAGTCGCTGCAATGGGACACGACAACGA  
 >Bacillus\_Fam\_1167\_52\_1 Nr. of seq. 1 Alignment length(with gaps) = 52  
 Alignment score = 0.000000  
 GAATCGTTACCGTCATGCGANGCTTTCAAGNCTAACGGGCACGATTCACTTC  
 >Bacillus\_Fam\_1168\_52\_1 Nr. of seq. 1 Alignment length(with gaps) = 52  
 Alignment score = 0.000000  
 CCTCTCATGTCCCGTATCATTGAAAAAAGGATGTGCTTGGGACATGAGACCA  
 >Bacillus\_Fam\_1169\_52\_1 Nr. of seq. 1 Alignment length(with gaps) = 52  
 Alignment score = 0.000000  
 CTATTCGCCCGAGGAGGAAGAAAAGTGTATCTAGGGGTAGAATAGGACGTCT  
 >Bacillus\_Fam\_1170\_52\_1 Nr. of seq. 1 Alignment length(with gaps) = 52  
 Alignment score = 0.000000  
 GGTCGAATAGGGCGTCTCTATTTCGCCCGAAGCGCCAGGTTCGAGTCGTTCAAA  
 >Bacillus\_Fam\_1171\_52\_1 Nr. of seq. 1 Alignment length(with gaps) = 52  
 Alignment score = 0.000000  
 CCTTGAATGGGACGTGATGAGTGTTATCAAAGCCCGATCGCCANCTTTTTTN  
 >Bacillus\_Fam\_1172\_52\_1 Nr. of seq. 1 Alignment length(with gaps) = 52  
 Alignment score = 0.000000  
 ACGGTAACGATTGAGGCCGAATCGTTCCCGCACCGTGCTATTTTTGGGAGTT  
 >Bacillus\_Fam\_1173\_52\_1 Nr. of seq. 1 Alignment length(with gaps) = 52  
 Alignment score = 0.000000  
 CGATTGAGTTCAGTTTATCCAAAATTACCCGCTAACGGGAACCAATGAGCT  
 >Bacillus\_Fam\_1174\_52\_1 Nr. of seq. 1 Alignment length(with gaps) = 52  
 Alignment score = 0.000000  
 TTCGGACAAGCCCAGGTGATTTTGAGCAATCNTAGTCCGAATAGCCGTCGAG  
 >Bacillus\_Fam\_1175\_52\_1 Nr. of seq. 1 Alignment length(with gaps) = 52  
 Alignment score = 0.000000  
 GTCGCCAATAAGGTGTATTGGTACCCGAACTCTACTATATTTAATAAAACG  
 >Bacillus\_Fam\_1176\_52\_1 Nr. of seq. 1 Alignment length(with gaps) = 52  
 Alignment score = 0.000000  
 GACAACCACACTCAAATTCGGCTGAAGAAGTCCGAAGTGGTAGTGGGTTC  
 >Bacillus\_Fam\_1177\_52\_1 Nr. of seq. 1 Alignment length(with gaps) = 52  
 Alignment score = 0.000000  
 AGGGAACCAATGACTCCTATTGATACCTCAAACAACGCTAATTTGCCAAATA  
 >Bacillus\_Fam\_1178\_52\_1 Nr. of seq. 1 Alignment length(with gaps) = 52  
 Alignment score = 0.000000  
 GGAAACAAGCAGCCCTATTGAGTACACTATTCCTCGAATTCTTTAAAAATG  
 >Bacillus\_Fam\_1179\_52\_1 Nr. of seq. 1 Alignment length(with gaps) = 52  
 Alignment score = 0.000000  
 TGTCTGAACCTTGAAGTGGTTCGGACTCGATTACCTTAAAAATCGCCATTGC  
 >Bacillus\_Fam\_1180\_52\_1 Nr. of seq. 1 Alignment length(with gaps) = 52  
 Alignment score = 0.000000  
 CTTTTTCTCCAGTGTTTCGGTCAACAATAACGGCGATTGGATACCCTTCTGT

```

>Bacillus_Fam_1181_52_1 Nr. of seq. 1 Alignment length(with gaps) = 52
Alignment score = 0.000000
TACTTCAGACTTCTTTTNCGCAATCAAGGGCTAACCTGTCCGAACCTGAGGC
>Bacillus_Fam_1182_52_1 Nr. of seq. 1 Alignment length(with gaps) = 52
Alignment score = 0.000000
GGCTATTGATAACCTTTTTTGCTTTTTTTACAGGAAAACTGAACTCAATAGA
>Bacillus_Fam_1183_52_1 Nr. of seq. 1 Alignment length(with gaps) = 52
Alignment score = 0.000000
TCTTGTTTCAGACTCGATCTCTTATTTTACCAAACCTGTCCGAACCTTGAC
>Bacillus_Fam_1184_52_1 Nr. of seq. 1 Alignment length(with gaps) = 52
Alignment score = 0.000000
CCTAACCTGTCCGAACCTCATCCCAAGTTCGGACTTCTTTGCTCTTGAATCCT
>Bacillus_Fam_1185_52_1 Nr. of seq. 1 Alignment length(with gaps) = 52
Alignment score = 0.000000
AGAAAAAGCGAACTCAACAAGCGTTATTGGTTCCCCGAAAACTAGCAGAAAGGC
>Bacillus_Fam_1186_52_1 Nr. of seq. 1 Alignment length(with gaps) = 52
Alignment score = 0.000000
AGATGTCCTTCATCAATGAAATGAAGGCCAAGNTATAGGGTTTCTACTGTC
>Bacillus_Fam_1187_52_1 Nr. of seq. 1 Alignment length(with gaps) = 52
Alignment score = 0.000000
TGAATTGTTCCCGTTCATCAACACCATCCACGATTGCGGTCACGATACNTCG
>Bacillus_Fam_1188_52_1 Nr. of seq. 1 Alignment length(with gaps) = 52
Alignment score = 0.000000
AGAGGAAGTATTGTGCCCGGAAAGGGAAAGCTCGAGAAGAAACGGGAACAAA
>Bacillus_Fam_1189_52_1 Nr. of seq. 1 Alignment length(with gaps) = 52
Alignment score = 0.000000
GTATTGTTCCCATAACTCTGCGAAAGACAGAAACGGTAACGATTAGTTGA
>Bacillus_Fam_1190_52_1 Nr. of seq. 1 Alignment length(with gaps) = 52
Alignment score = 0.000000
GGGAACAATAGAAAGTAGAATCGTGCCCGAAATCAGGAGAGAGCAGTGNCCCC
>Bacillus_Fam_1191_52_1 Nr. of seq. 1 Alignment length(with gaps) = 52
Alignment score = 0.000000
ACAACGGTAACGATCAGAGGTGGAATGTGCCCCGTAGCGGAGGAAATCTCGGG
>Bacillus_Fam_1192_52_1 Nr. of seq. 1 Alignment length(with gaps) = 52
Alignment score = 0.000000
TGTCCCTTCATGAAGGTAATGAAGTCCAAACTAGGTGTACCAAAATCGAAAAG
>Bacillus_Fam_1193_52_1 Nr. of seq. 1 Alignment length(with gaps) = 52
Alignment score = 0.000000
AGCGATGAAGGCCAAAATGTGCTCGGTAACAAGAGCAGATGACCTTCATAAA
>Bacillus_Fam_1194_52_1 Nr. of seq. 1 Alignment length(with gaps) = 52
Alignment score = 0.000000
ATCGTGCCCAATACCGAGGCNGACATGGAATAACGGGAACAATACCAGGAGA
>Bacillus_Fam_1195_52_1 Nr. of seq. 1 Alignment length(with gaps) = 52
Alignment score = 0.000000
TGAAGGACACTTCCCTTGTTTTCTATCACTATCTTGTCCCTCATAACCCCGA
>Bacillus_Fam_1196_52_1 Nr. of seq. 1 Alignment length(with gaps) = 52
Alignment score = 0.000000
CTTTGGTCTTTATAACCCGCTTAAAGGACAATTCCTTTAAAAATTTGATTC
>Bacillus_Fam_1197_52_1 Nr. of seq. 1 Alignment length(with gaps) = 52
Alignment score = 0.000000
TGTCCCTTCATATGCTCCATGAAGGACATGTCCATGGGTATTTTCGGTTGTCT
>Bacillus_Fam_1198_52_1 Nr. of seq. 1 Alignment length(with gaps) = 52
Alignment score = 0.000000
ATTAGAGTAAAAGGTCTTCATCGATGTTATGAAGACCAAAACCGGGTTCAGAG

```

>Bacillus\_Fam\_1199\_52\_1 Nr. of seq. 1 Alignment length(with gaps) = 52  
Alignment score = 0.000000  
TGATTGCGACACGGATTTCGGNAAAATTCAAAGATGAGTCCGAATAAGAGTG

>Bacillus\_Fam\_1200\_52\_1 Nr. of seq. 1 Alignment length(with gaps) = 52  
Alignment score = 0.000000  
CTTGTGTTGTCCGAATCAAGGCGTCATTTCGGACAGCTACGCCAGATTTTCCTG

>Bacillus\_Fam\_1201\_52\_1 Nr. of seq. 1 Alignment length(with gaps) = 52  
Alignment score = 0.000000  
ATGATTTCGGACACAGATCAGGAAAAACCGCACCCCTCGAGTCCGAATGAAGCG

>Bacillus\_Fam\_1202\_52\_1 Nr. of seq. 1 Alignment length(with gaps) = 52  
Alignment score = 0.000000  
AGTCCGAATGCAAGGCTGATTTCGGACAGTTGGGTTCAGGGGAATNCAGAAGCG

>Bacillus\_Fam\_1203\_52\_1 Nr. of seq. 1 Alignment length(with gaps) = 52  
Alignment score = 0.000000  
CTGTCCAGAAATCAACCCTTCATTTCGGACTCAACTACTCGTATTCCTTACTTCT

>Bacillus\_Fam\_1204\_52\_1 Nr. of seq. 1 Alignment length(with gaps) = 52  
Alignment score = 0.000000  
AGGTCTTCATGAGGTTGATGAAGACCTATTTGCAACTAGTATTCTCTCGGAA

>Bacillus\_Fam\_1205\_52\_1 Nr. of seq. 1 Alignment length(with gaps) = 52  
Alignment score = 0.000000  
GAATCGTACCCGATTTCGGGGCAATTGCAAGGAAAAGGGTAACGCAAACGTGG

>Bacillus\_Fam\_1206\_52\_1 Nr. of seq. 1 Alignment length(with gaps) = 52  
Alignment score = 0.000000  
CTGTCCGAATGAGGCATGAATTCGGACTCATAAACGTTTTTTTGGGACCTACA

>Bacillus\_Fam\_1207\_52\_1 Nr. of seq. 1 Alignment length(with gaps) = 52  
Alignment score = 0.000000  
TGGTCTTCATCACCTCAATGATAACCGTTTTCCGCGATTTCAGCGAACGAGTTT

>Bacillus\_Fam\_1208\_52\_1 Nr. of seq. 1 Alignment length(with gaps) = 52  
Alignment score = 0.000000  
TGTCCGAATCATAGGCTCATTTCGGACTTAAGGCAACAGAATCCTTTGCGACG

>Bacillus\_Fam\_1209\_52\_1 Nr. of seq. 1 Alignment length(with gaps) = 52  
Alignment score = 0.000000  
GAATCGTTCCCGATTGCAAATAAAAATCATAAAAAGAGTAACGCAAGCCCTC

>Bacillus\_Fam\_1210\_52\_1 Nr. of seq. 1 Alignment length(with gaps) = 52  
Alignment score = 0.000000  
TTACCGGGGACTCTTGATTTCCTCCTTCACGGTAAGCATACTCCCTCTTTGN

>Bacillus\_Fam\_1211\_52\_1 Nr. of seq. 1 Alignment length(with gaps) = 52  
Alignment score = 0.000000  
ACCGAAAAGAGGCCCAAGTCCCGCTCCAGGTAACCAAAACCCAGTAAAGGTA

>Bacillus\_Fam\_1212\_52\_1 Nr. of seq. 1 Alignment length(with gaps) = 52  
Alignment score = 0.000000  
ATGGTACCGGAAAAGAGAGAAGCTGTACGATGGCAACGCGAATCTCGTAGCC

>Bacillus\_Fam\_1213\_52\_1 Nr. of seq. 1 Alignment length(with gaps) = 52  
Alignment score = 0.000000  
TGCTCTATCGGTTTCGTTTTGNCTCTTGAGTACCATTTGGCGTTNGTGCTCC

>Bacillus\_Fam\_1214\_52\_1 Nr. of seq. 1 Alignment length(with gaps) = 52  
Alignment score = 0.000000  
GATCTTCCCGCATACCGGGATTTCGGGTACTTCATGCAATGCTAGCTGCCGC

>Bacillus\_Fam\_1215\_52\_1 Nr. of seq. 1 Alignment length(with gaps) = 52  
Alignment score = 0.000000  
CAAAAATGTAAAAGGAANGCCGGCTTGTATATAGATTTTCGGTGTAGAAGGT

>Bacillus\_Fam\_1216\_52\_1 Nr. of seq. 1 Alignment length(with gaps) = 52  
Alignment score = 0.000000  
GCACAGCAATGGTACCGCTTCTCCTTTAACCGGTTCCATAGCAGTACGCCCCG

```

>Bacillus_Fam_1217_52_1 Nr. of seq. 1 Alignment length(with gaps) = 52
Alignment score = 0.000000
CAAGTGGACGAATCCGCCGGATGCGGGAAGATAAGGATGGATGAACCCTGCT
>Bacillus_Fam_1218_52_1 Nr. of seq. 1 Alignment length(with gaps) = 52
Alignment score = 0.000000
CCAACTTGGTCGCCAAAGCCCCGGAATGAAGCCCCAAGAACGAAGCAANNAGT
>Bacillus_Fam_1219_52_1 Nr. of seq. 1 Alignment length(with gaps) = 52
Alignment score = 0.000000
TGCCCCGAAAGAGCCGTATGCGGGAATTTGAACAAGACCCATCAATCCCGAAG
>Bacillus_Fam_1220_52_1 Nr. of seq. 1 Alignment length(with gaps) = 52
Alignment score = 0.000000
CAAAATTAAAACAAGAAGTGCTTCATACAGCGTTTATGAGGTACATGGTTTT
>Bacillus_Fam_1221_52_1 Nr. of seq. 1 Alignment length(with gaps) = 52
Alignment score = 0.000000
TACATTTTACAAGCATCTATTCAAAAATGTAAAAGCAAAGCAAGGATACCTA
>Bacillus_Fam_1222_52_1 Nr. of seq. 1 Alignment length(with gaps) = 52
Alignment score = 0.000000
GTCCGATGGAGAAGGAAAGCGTGAGGCTATGAGGCTGGAAAGAAGAGAAGCG
>Bacillus_Fam_1223_52_1 Nr. of seq. 1 Alignment length(with gaps) = 52
Alignment score = 0.000000
GCTCCCTTTTGACNCNTTTTCGAGTTCAGCGCTNTTTTCNGGTGAATAGGTG
>Bacillus_Fam_1224_52_1 Nr. of seq. 1 Alignment length(with gaps) = 52
Alignment score = 0.000000
TCTTTCTTACCGTAACCACCTCTCAAACCTAGTCTTCGGTTCGTTTAAGAGCCC
>Bacillus_Fam_1225_52_1 Nr. of seq. 1 Alignment length(with gaps) = 52
Alignment score = 0.000000
TTCCAATCAAGGGNATTGGTGCATGAACCCGAAAAAAACCGNGTAGTTCAAG
>Bacillus_Fam_1226_52_1 Nr. of seq. 1 Alignment length(with gaps) = 52
Alignment score = 0.000000
GCCACTTTTTTCGCTTCTCCCTTCCATTTTGGCTTTCATCTTGGAATGAAC
>Bacillus_Fam_1227_52_1 Nr. of seq. 1 Alignment length(with gaps) = 52
Alignment score = 0.000000
ATAAGTGGTTTTTCATTCAACAAATGAACGCCACTTTTTATGGAAAAGATGGC
>Bacillus_Fam_1228_52_1 Nr. of seq. 1 Alignment length(with gaps) = 52
Alignment score = 0.000000
GTTTCATCAGTTGGATGAAAGCCGAAATCCCGTGAGCAAGAGGAAAAGAGGC
>Bacillus_Fam_1229_52_1 Nr. of seq. 1 Alignment length(with gaps) = 52
Alignment score = 0.000000
TTTAGTGCCCGCGTATACCAGAAATTAGTAGAATGAGGTCACTAAAAGTTAA
>Bacillus_Fam_1230_52_1 Nr. of seq. 1 Alignment length(with gaps) = 52
Alignment score = 0.000000
TCCAGATATTAGGAAAACCAGGGCACTATATTTCAGATTTAACACCCTTAAAA
>Bacillus_Fam_1231_52_1 Nr. of seq. 1 Alignment length(with gaps) = 52
Alignment score = 0.000000
AGTCCGAATGACGGTCTGATTAGGACAGCAACAGCAGCTCAAACCTAATTCAC
>Bacillus_Fam_1232_52_1 Nr. of seq. 1 Alignment length(with gaps) = 52
Alignment score = 0.000000
GAAGTTCATCTGGCTCATGAACGTCATTACAAAGAGAAAAGACTGAGCAAAT
>Bacillus_Fam_1233_52_1 Nr. of seq. 1 Alignment length(with gaps) = 52
Alignment score = 0.000000
TCTCTTACCATCCATCATGATTTTCCGCCCCTTTGGGCACTGAGACGCCTTC
>Bacillus_Fam_1234_52_1 Nr. of seq. 1 Alignment length(with gaps) = 52
Alignment score = 0.000000
ATCTTTCCCTTCCTTTTTTCAGCCAAACGTGGAAGTAGAACCCTCTACTTCA

```

```

>Bacillus_Fam_1235_52_1 Nr. of seq. 1 Alignment length(with gaps) = 52
Alignment score = 0.000000
GAAAGGGAGAAACGGTCGATAAGAGCGGTTCATAACGACCATTTGGGTGAG
>Bacillus_Fam_1236_52_1 Nr. of seq. 1 Alignment length(with gaps) = 52
Alignment score = 0.000000
CTCATGAGGACAGGAATCATGTTTAATTCACATTTTTTGTCTCATGAAAGG
>Bacillus_Fam_1237_52_1 Nr. of seq. 1 Alignment length(with gaps) = 52
Alignment score = 0.000000
ATCGACCGTAATTGACTTTTCAGCTTGGCTATCGGGCTTTATAAACCTTTCTT
>Bacillus_Fam_1238_52_1 Nr. of seq. 1 Alignment length(with gaps) = 52
Alignment score = 0.000000
ATGAAGGACTAATCCCTATTAGAAAGACAGCGTTTTGTCTTCATCAAGCAT
>Bacillus_Fam_1239_52_1 Nr. of seq. 1 Alignment length(with gaps) = 52
Alignment score = 0.000000
GGTTTCCAATCAGCCCTATTGGAACAAGTTAAGGCNAAAAAGTCGGTCAAAA
>Bacillus_Fam_1240_52_1 Nr. of seq. 1 Alignment length(with gaps) = 52
Alignment score = 0.000000
TTTTGTCTCATGAAGCACTCATGCGGACAGTTTCGCCTTGGGAACCCCGGG
>Bacillus_Fam_1241_52_1 Nr. of seq. 1 Alignment length(with gaps) = 52
Alignment score = 0.000000
TCATAGTGCCCGAAACCTGAAAAAACAGCCACTCGGGCACTGAGAGCAGT
>Bacillus_Fam_1242_52_1 Nr. of seq. 1 Alignment length(with gaps) = 52
Alignment score = 0.000000
CTATTGGACAGTTGGGGTTGTATCTTCGTCGATATTGTCTATAGACCGCTT
>Bacillus_Fam_1243_52_1 Nr. of seq. 1 Alignment length(with gaps) = 52
Alignment score = 0.000000
GGATAACGGGCTCCAATGAGGGTTATTGGCGACCGAAACGCTCTCGAATTCC
>Bacillus_Fam_1244_52_1 Nr. of seq. 1 Alignment length(with gaps) = 52
Alignment score = 0.000000
GGTCACAGAGAGCGATCCTCAGTGCCCGAAGAGAGGCAAAAAGCTGTCTAGC
>Bacillus_Fam_1245_52_1 Nr. of seq. 1 Alignment length(with gaps) = 52
Alignment score = 0.000000
TGTCCCTTAGATCCTCTCTCTCGGACACTCCTTCTCCTTTTTCTCAATATT
>Bacillus_Fam_1246_52_1 Nr. of seq. 1 Alignment length(with gaps) = 52
Alignment score = 0.000000
TGTCCCTTAGACGACTTCTCTCGGACACTTCCAACCCCTTCTCCCGCGAGAC
>Bacillus_Fam_1247_52_1 Nr. of seq. 1 Alignment length(with gaps) = 52
Alignment score = 0.000000
CTATTGGACAGATCCTCTCCTCTTTTGGCTCGGACTGTCTTTAGCGCCCTC
>Bacillus_Fam_1248_52_1 Nr. of seq. 1 Alignment length(with gaps) = 52
Alignment score = 0.000000
TATCGAAGACAAATTCCACCGCTTCCACCCTCGTTTTGTCTCAAGACGCCT
>Bacillus_Fam_1249_52_1 Nr. of seq. 1 Alignment length(with gaps) = 52
Alignment score = 0.000000
GGGCACGTAGACGCNTTCTACGTTACCTTGAGGCGGGATATTACGCTGGAT
>Bacillus_Fam_1250_52_1 Nr. of seq. 1 Alignment length(with gaps) = 52
Alignment score = 0.000000
GGGCACGTAGANCACGTCTACGTGACCGAACCGTCAGTTTTTTCAGCTGNTTG
>Bacillus_Fam_1251_52_1 Nr. of seq. 1 Alignment length(with gaps) = 52
Alignment score = 0.000000
CGGGCACGTAGAACACTTCTATGTGACCTTACACTGCTTTTTTCATGCCCGTT
>Bacillus_Fam_1252_52_1 Nr. of seq. 1 Alignment length(with gaps) = 52
Alignment score = 0.000000
TATTGAAGACAAAATGAGATCACTCCCTTTTAAATTTGTCCCAATACCCTC

```

```

>Bacillus_Fam_1253_52_1 Nr. of seq. 1 Alignment length(with gaps) = 52
Alignment score = 0.000000
AAGTGTCTCCAATAAGCTTCATTGGAGACAAAACCCNCTCTTTTTTTCACGAG
>Bacillus_Fam_1254_52_1 Nr. of seq. 1 Alignment length(with gaps) = 52
Alignment score = 0.000000
AAAGTCACGTAGAAACCCTCTACGTGACCGTACCTCCCTTTTTTNCCTGCTCT
>Bacillus_Fam_1255_52_1 Nr. of seq. 1 Alignment length(with gaps) = 52
Alignment score = 0.000000
CGGATTTTCCCTTTTCAGACATCACTTAGACGGNCTCTACTTAGTGTCTAAAC
>Bacillus_Fam_1256_52_1 Nr. of seq. 1 Alignment length(with gaps) = 52
Alignment score = 0.000000
ATGAGAACTGAAACCANGAAAAGCGCGGNGTCTTGTCTCATGAAGCGTTC
>Bacillus_Fam_1257_52_1 Nr. of seq. 1 Alignment length(with gaps) = 52
Alignment score = 0.000000
GACCGAGCAGCTGGAAAAATAGGAAGAAGAGTCGCGTAGAGAGGTTCTANGC
>Bacillus_Fam_1258_52_1 Nr. of seq. 1 Alignment length(with gaps) = 52
Alignment score = 0.000000
TAAGAAAGGCTCTCAAGGACAAAACGCTAGTAAAAATTAATAGAANTGTCTT
>Bacillus_Fam_1259_52_1 Nr. of seq. 1 Alignment length(with gaps) = 52
Alignment score = 0.000000
TCCATTGCCCAAACCGGCTAAATCATCAAATTATGGTCAATGCAGCCCCAT
>Bacillus_Fam_1260_52_1 Nr. of seq. 1 Alignment length(with gaps) = 52
Alignment score = 0.000000
TGTCTGAATGATTATTTTGCAGCCAGAGATCAGTTAGAATCCGTCTAGTTGC
>Bacillus_Fam_1261_52_1 Nr. of seq. 1 Alignment length(with gaps) = 52
Alignment score = 0.000000
ATGAACCTTTTCATAGAGCGCGTCGGAGTAAAAAATCGAGCTCCCGCGTACT
>Bacillus_Fam_1262_52_1 Nr. of seq. 1 Alignment length(with gaps) = 52
Alignment score = 0.000000
GTTTCATAGAGCGCGAACNTGAGGGGAAATTCCAAAAACGCGCACTATAAAGA
>Bacillus_Fam_1263_52_1 Nr. of seq. 1 Alignment length(with gaps) = 52
Alignment score = 0.000000
TTTCGGAAAAGGTGTTTCATAGAAGAGGTCAATGAGCACATGAGGCTGAGTTT
>Bacillus_Fam_1264_52_1 Nr. of seq. 1 Alignment length(with gaps) = 52
Alignment score = 0.000000
ACTATGGGAGGTTTCATAGAGCGNGAAATTAGGAAAAAGGAAAGACTCCGCGC
>Bacillus_Fam_1265_52_1 Nr. of seq. 1 Alignment length(with gaps) = 52
Alignment score = 0.000000
TATTGCCCGAAGAGAAGAAAAAATAAATCCCGCGGTAAAAAGACCGGGCTTC
>Bacillus_Fam_1266_52_1 Nr. of seq. 1 Alignment length(with gaps) = 52
Alignment score = 0.000000
AGCGTTTATGAGAACAGAGAGCTAATGATTTGGGTGCGAACTGTCCTCATGA
>Bacillus_Fam_1267_52_1 Nr. of seq. 1 Alignment length(with gaps) = 52
Alignment score = 0.000000
AAAAAAGAGAGCGCCGGGTAGAATANAGAGCATCTATGCGACCGAGCCCGAG
>Bacillus_Fam_1268_52_1 Nr. of seq. 1 Alignment length(with gaps) = 52
Alignment score = 0.000000
TCAATGAACACGAATCGGCAAATTTTCAGGCAGGAAGTGTTTCATAGAGAGGT
>Bacillus_Fam_1269_52_1 Nr. of seq. 1 Alignment length(with gaps) = 52
Alignment score = 0.000000
TCTACGTGCCCAAGTTCAATAAATTAGTGGGTTTCGGTCGCGTAGAGCCCT
>Bacillus_Fam_1270_52_1 Nr. of seq. 1 Alignment length(with gaps) = 52
Alignment score = 0.000000
TTGACCTTTTCTTTNAAAATCAATTAGTTTTAGGCAATGNACATGGCTTCCA

```

```

>Bacillus_Fam_1271_52_1 Nr. of seq. 1 Alignment length(with gaps) = 52
Alignment score = 0.000000
CATCCTCTTCAGGTGAAAAAGCCCAATTATTCACCGGAGTGCTCATATTTT
>Bacillus_Fam_1272_52_1 Nr. of seq. 1 Alignment length(with gaps) = 52
Alignment score = 0.000000
TTATTCCTCTAAAGCAACGCCACACGCGCCTCTTCAGGTGAACAAATCGCAT
>Bacillus_Fam_1273_52_1 Nr. of seq. 1 Alignment length(with gaps) = 52
Alignment score = 0.000000
GTTATTTACACGAAGGGATTTTGAACCGAATGCTTCAGGTGAATAAATTGCG
>Bacillus_Fam_1274_52_1 Nr. of seq. 1 Alignment length(with gaps) = 52
Alignment score = 0.000000
ATTTATTCCCATGAAGCGAGAGGAAAACCGGAGCTTCCGGTGGATAAACTGA
>Bacillus_Fam_1275_52_1 Nr. of seq. 1 Alignment length(with gaps) = 52
Alignment score = 0.000000
AAAATGGTCACAGAGTGCCAACTAAGACCAAAATGACAAGGGAGCAAGCGG
>Bacillus_Fam_1276_52_1 Nr. of seq. 1 Alignment length(with gaps) = 52
Alignment score = 0.000000
GGAAGGTAGGAGAGAGGCAGTCTCATCGCCCGTTCCAGCTATTTACCATTA
>Bacillus_Fam_1277_52_1 Nr. of seq. 1 Alignment length(with gaps) = 52
Alignment score = 0.000000
CATAGAGCGAGTCAATGGGACATTTNGCAATTTTCNAGAGCAGCAAATGTCC
>Bacillus_Fam_1278_52_1 Nr. of seq. 1 Alignment length(with gaps) = 52
Alignment score = 0.000000
TGATGGACAAAACAGTAGATAGAGCGCAAAGCAAAGTCCATCAATCCTGAGA
>Bacillus_Fam_1279_52_1 Nr. of seq. 1 Alignment length(with gaps) = 52
Alignment score = 0.000000
TTCCTTCGTTTCTTCATGGGTTTTGTACCATTGATTGCTTCTATGGGACATG
>Bacillus_Fam_1280_52_1 Nr. of seq. 1 Alignment length(with gaps) = 52
Alignment score = 0.000000
GATTTTTCCTAAAGTACCTTGTTGCGGGCGACATGAGCGCTTCTTGGCTACC
>Bacillus_Fam_1281_52_1 Nr. of seq. 1 Alignment length(with gaps) = 52
Alignment score = 0.000000
GACTTTTTCGGGAGACATGAGCTAGTCTTGGCGACCGGTTTCACAAGTTGAT
>Bacillus_Fam_1282_52_1 Nr. of seq. 1 Alignment length(with gaps) = 52
Alignment score = 0.000000
TTCTATGAGACAAAATCGGGGAGCAGACGAGNGTTTGTCTCATTGGAGCG
>Bacillus_Fam_1283_52_1 Nr. of seq. 1 Alignment length(with gaps) = 52
Alignment score = 0.000000
GACTCTTTGAGCNGATTTTTCGGGCGTTGGGTCTCTATCNGGCTTATTGAN
>Bacillus_Fam_1284_52_1 Nr. of seq. 1 Alignment length(with gaps) = 52
Alignment score = 0.000000
TTTGTCTTCATTCGCTTGATGATGGACTTTTTCTAGAGCGATCGGCTTCGN
>Bacillus_Fam_1285_52_1 Nr. of seq. 1 Alignment length(with gaps) = 52
Alignment score = 0.000000
ATGATGGACATTTTCGATAATTTCTCAGCTGCTTTTGGCCTTCATCTCTTCG
>Bacillus_Fam_1286_52_1 Nr. of seq. 1 Alignment length(with gaps) = 52
Alignment score = 0.000000
ATGATGGACACTTGGAGCGGATTCTTTTTTCGCTTTTGTCCATCATCTCTCGC
>Bacillus_Fam_1287_52_1 Nr. of seq. 1 Alignment length(with gaps) = 52
Alignment score = 0.000000
TTTTGTCCCATAGAACCCCTCTATGGGACATTTCTCTTGCTTATTCTGATC
>Bacillus_Fam_1288_52_1 Nr. of seq. 1 Alignment length(with gaps) = 52
Alignment score = 0.000000
AGGATTTTCAGGAATCAGAACATCAATGTAAATCCCGAAACCAGTTCCATGCA

```

>Bacillus\_Fam\_1289\_52\_1 Nr. of seq. 1 Alignment length(with gaps) = 52  
Alignment score = 0.000000  
ATTTGGATATTAAGGTCGTGATAAGCGCCTAAACACCCCTCTGTTATACAGT

>Bacillus\_Fam\_1290\_52\_1 Nr. of seq. 1 Alignment length(with gaps) = 52  
Alignment score = 0.000000  
TCTCCTTCCCCAACTCTATTGATGACCGGCATTTTCGGGAAGTACTCTGCCTN

>Bacillus\_Fam\_1291\_52\_1 Nr. of seq. 1 Alignment length(with gaps) = 52  
Alignment score = 0.000000  
ATTCCCGAATTCCTTAATGCACTTGTTTCGGGAATTACTACGGGCTTCTC

>Bacillus\_Fam\_1292\_52\_1 Nr. of seq. 1 Alignment length(with gaps) = 52  
Alignment score = 0.000000  
ACGGGCACCTTTGANCGCACNTTGTTCNCCAAACGCTTTTTTCCAAGCCG

>Bacillus\_Fam\_1293\_52\_1 Nr. of seq. 1 Alignment length(with gaps) = 52  
Alignment score = 0.000000  
GAATTAGAAATCCAAGAGTCATTCTGAAACGGTCTCAACCATGGAAGTTCGG

>Bacillus\_Fam\_1294\_52\_1 Nr. of seq. 1 Alignment length(with gaps) = 52  
Alignment score = 0.000000  
AACGCTTAATCACGACAGTATTATCCAGATAACGGTAATTAGGGGCGTGATA

>Bacillus\_Fam\_1295\_52\_1 Nr. of seq. 1 Alignment length(with gaps) = 52  
Alignment score = 0.000000  
AGCGGATTTTCGGGAATTACTTTCCCTTTGCATTTCCCGAAACTTTGTCTCCT

>Bacillus\_Fam\_1296\_52\_1 Nr. of seq. 1 Alignment length(with gaps) = 52  
Alignment score = 0.000000  
TTACGCCTTAAACACGACTCCAATTCCCAGGTTTTGGTGTTCGTGTCTCGA

>Bacillus\_Fam\_1297\_52\_1 Nr. of seq. 1 Alignment length(with gaps) = 52  
Alignment score = 0.000000  
GTTCTATTTCCCCAAACCGGCACTCGCCTTCTCTTTCGGGAATTACTTTGCC

>Bacillus\_Fam\_1298\_52\_1 Nr. of seq. 1 Alignment length(with gaps) = 52  
Alignment score = 0.000000  
TTTTGTCTTCATACCACCGATGAAGGACTTTTGACAACGAAAATTCACCAG

>Bacillus\_Fam\_1299\_52\_1 Nr. of seq. 1 Alignment length(with gaps) = 52  
Alignment score = 0.000000  
TGAAGGACTTTTATCACCTTTTATTCTCGCGAAAAGTCCTTCATACCTGCGA

>Bacillus\_Fam\_1300\_52\_1 Nr. of seq. 1 Alignment length(with gaps) = 52  
Alignment score = 0.000000  
GATGAAGGACTATTCTTGCTTTGATTGTGTCTCGAATGGTCCATCATCCCCTC

>Bacillus\_Fam\_1301\_52\_1 Nr. of seq. 1 Alignment length(with gaps) = 52  
Alignment score = 0.000000  
AAGTCCTTCATCGTGGTTATGAAGACCAATAAGAGGTTAATTAGGAAGCGAA

>Bacillus\_Fam\_1302\_52\_1 Nr. of seq. 1 Alignment length(with gaps) = 52  
Alignment score = 0.000000  
CGGTGCGCATAGCAAGGTTCTATAAGCCCGGAAACACAGGAAATCCAATGGAA

>Bacillus\_Fam\_1303\_52\_1 Nr. of seq. 1 Alignment length(with gaps) = 52  
Alignment score = 0.000000  
AGTGAACCGGCGGAAACAGAGTTCAAAGAAGGGGCTATGTTCCCGAAATCG

>Bacillus\_Fam\_1304\_52\_1 Nr. of seq. 1 Alignment length(with gaps) = 52  
Alignment score = 0.000000  
GCGTGTCATAGAGCCCGAATGAAACGCGAANTCGCTGGGGCTTAGTGAAAAC

>Bacillus\_Fam\_1305\_52\_1 Nr. of seq. 1 Alignment length(with gaps) = 52  
Alignment score = 0.000000  
TGGAATTGTCATCATAGCAATCATGAAGACAATCTCGAGCGGATTTTGTGAG

>Bacillus\_Fam\_1306\_52\_1 Nr. of seq. 1 Alignment length(with gaps) = 52  
Alignment score = 0.000000  
CCTTATGAAGACACTTTTCGGTCCACTTTCTCTCTCGGATGTGTCTTCATCCA



```

>Bacillus_Fam_1307_52_1 Nr. of seq. 1 Alignment length(with gaps) = 52
Alignment score = 0.000000
CGTTTTCTTGCCTCGCTTCGAAGTTTGGGTGCCATTGCGCCTCTATGACACG
>Bacillus_Fam_1308_52_1 Nr. of seq. 1 Alignment length(with gaps) = 52
Alignment score = 0.000000
CGCGAATTTCCCTCCCGCTCCTAATTTGGTGTGTCATACTGCTCCTATGACG
>Bacillus_Fam_1309_52_1 Nr. of seq. 1 Alignment length(with gaps) = 52
Alignment score = 0.000000
TTTCCCTCTCAACATTGTCTTCATCCACCTTGTGAAGACAGTACCATGCTTG
>Bacillus_Fam_1310_52_1 Nr. of seq. 1 Alignment length(with gaps) = 52
Alignment score = 0.000000
AGATTGTCTTCATCACNCTTATAATGACAATCTTGAACGATTTTCACTGTG
>Bacillus_Fam_1311_52_1 Nr. of seq. 1 Alignment length(with gaps) = 52
Alignment score = 0.000000
AAGACACTTTTGCCGTGTTTTCTGCTGACATTGTCTTCAGACCACTGATG
>Bacillus_Fam_1312_52_1 Nr. of seq. 1 Alignment length(with gaps) = 52
Alignment score = 0.000000
CTCATGAACCGCTTATGAGTAAGTAAATACATGATTTAGATTATTTAGTTA
>Bacillus_Fam_1313_52_1 Nr. of seq. 1 Alignment length(with gaps) = 52
Alignment score = 0.000000
AATGTGTCTCAAGAATAGGGTTGGAAACAGATAAACCGGGAATNNCGTTGAA
>Bacillus_Fam_1314_52_1 Nr. of seq. 1 Alignment length(with gaps) = 52
Alignment score = 0.000000
GGTAACCTTTCGCGGGCTTTGGTTACCCGGATCTCATCACAGAGCCNACTTC
>Bacillus_Fam_1315_52_1 Nr. of seq. 1 Alignment length(with gaps) = 52
Alignment score = 0.000000
TCTTCAAGGTAATCAAAAGCTCACAAAGGTACCCGAGCCGCCGGAATTACCT
>Bacillus_Fam_1316_52_1 Nr. of seq. 1 Alignment length(with gaps) = 52
Alignment score = 0.000000
TGGAGACACATTTTATTGCTAAAAAGTAAATAATGTGTTTCAGAACCAGNGC
>Bacillus_Fam_1317_52_1 Nr. of seq. 1 Alignment length(with gaps) = 52
Alignment score = 0.000000
TAAGACACATAATGTGACCAACCCCAAAAAATGTGTCTCACCCGCCAGTCT
>Bacillus_Fam_1318_52_1 Nr. of seq. 1 Alignment length(with gaps) = 52
Alignment score = 0.000000
CGTTGTTTCGGGCACATGAACCCTCTATAGTTCCCAGTCTCTTGCTTCCAT
>Bacillus_Fam_1319_52_1 Nr. of seq. 1 Alignment length(with gaps) = 52
Alignment score = 0.000000
CCGTTTGAGCAGCTCGAAGGAGATAGCGGTCACTATGAAAAGCGTCATGGTGA
>Bacillus_Fam_1320_52_1 Nr. of seq. 1 Alignment length(with gaps) = 52
Alignment score = 0.000000
ACTTCAGACAACTTCTGCNGCCAATTACTTAAACCTGTCCGAACCTCTGCCT
>Bacillus_Fam_1321_52_1 Nr. of seq. 1 Alignment length(with gaps) = 52
Alignment score = 0.000000
GAGCAACTTGATCATAGACCTCCTATGATTCACTTCCCTACAATTCATGTGC
>Bacillus_Fam_1322_52_1 Nr. of seq. 1 Alignment length(with gaps) = 52
Alignment score = 0.000000
TGTCTGAAGTTGAGNAGCCTTCGGACAGGTTAGAAGCCTACAGAGTAAAAGC
>Bacillus_Fam_1323_52_1 Nr. of seq. 1 Alignment length(with gaps) = 52
Alignment score = 0.000000
AAGCTGTCCGAAGAGAGCTCAGGTTACAGACAGGTTTGCTCAGGTTNAGTAGA
>Bacillus_Fam_1324_52_1 Nr. of seq. 1 Alignment length(with gaps) = 52
Alignment score = 0.000000
TCTGATTCCCTTTCAGTAGTGNATCGGGGTAGAAAGGGAACGAAAGAGCAAG

```

```

>Bacillus_Fam_1325_52_1 Nr. of seq. 1 Alignment length(with gaps) = 52
Alignment score = 0.000000
AGATTCCCTTACTAGGCAAAATGAAGTGCAAAGGGAACGAAAGGTAGTCAC
>Bacillus_Fam_1326_52_1 Nr. of seq. 1 Alignment length(with gaps) = 52
Alignment score = 0.000000
GAAAGCTGTCCGAACCTTCACTTGGGTTCGGACTACTTTTCCTTTACGACCAC
>Bacillus_Fam_1327_52_1 Nr. of seq. 1 Alignment length(with gaps) = 52
Alignment score = 0.000000
ATTCCCTTTGTCTGGAGAAAATACACAGGAAAGGGAACGAAAGGAGCGCTTTG
>Bacillus_Fam_1328_52_1 Nr. of seq. 1 Alignment length(with gaps) = 52
Alignment score = 0.000000
AAGCTGTCTGAACCTACCCACCTTCGGACAGCTTGACTCCGAAAAACCCAA
>Bacillus_Fam_1329_52_1 Nr. of seq. 1 Alignment length(with gaps) = 52
Alignment score = 0.000000
ATTATGGGTAACGATAAAGGCGTGATCGTGCCCTGAACTCGAGAATATAGTG
>Bacillus_Fam_1330_52_1 Nr. of seq. 1 Alignment length(with gaps) = 52
Alignment score = 0.000000
GAGTCTGAACCTNGCGTGAGTTCGGACAGGAATCGTGANTGTGAATGTAAGC
>Bacillus_Fam_1331_52_1 Nr. of seq. 1 Alignment length(with gaps) = 52
Alignment score = 0.000000
TGTCCAATAGGATGCCTCTATCGGACATAACTCACTTCCCAAGACTAGATTC
>Bacillus_Fam_1332_52_1 Nr. of seq. 1 Alignment length(with gaps) = 52
Alignment score = 0.000000
ACGGCTCTATCGAACAAACTATGGGCCTTCACGCTTGGTTTGTCCAATAGG
>Bacillus_Fam_1333_52_1 Nr. of seq. 1 Alignment length(with gaps) = 52
Alignment score = 0.000000
CTATTGGACAAAATCGCTTCACGGCACTGGCGGTTTGTCTAATACAGGCTTC
>Bacillus_Fam_1334_52_1 Nr. of seq. 1 Alignment length(with gaps) = 52
Alignment score = 0.000000
ATCAGAGACCTTTGGACAGCTTCTTCGNNTGATATGGTCATTGACACCTCTC
>Bacillus_Fam_1335_52_1 Nr. of seq. 1 Alignment length(with gaps) = 52
Alignment score = 0.000000
TTTTGTCCGATAGAGACCTCTTATTGGACAAAACCTTTGCTGGCACCGTTTCG
>Bacillus_Fam_1336_52_1 Nr. of seq. 1 Alignment length(with gaps) = 52
Alignment score = 0.000000
ATAAGTGCCCGTTCTAGGGTCCCTAGCAAGGAGAGCGGTCATCTAACTCGAG
>Bacillus_Fam_1337_52_1 Nr. of seq. 1 Alignment length(with gaps) = 52
Alignment score = 0.000000
ACTTCAGACAGAAGAAGGTAAAAGAAGTAAGGGAGAGTCTGAANTNGAAGTG
>Bacillus_Fam_1338_52_1 Nr. of seq. 1 Alignment length(with gaps) = 52
Alignment score = 0.000000
TTCTATTGGACATTCTCATCGATACGAACGCACGTTTTGTCCAATAGACGCC
>Bacillus_Fam_1339_52_1 Nr. of seq. 1 Alignment length(with gaps) = 52
Alignment score = 0.000000
AAGAGCAAATCGTTGACGAAACGAGCATTTTGAAAGCTGAACGTCAACGAAT
>Bacillus_Fam_1340_52_1 Nr. of seq. 1 Alignment length(with gaps) = 52
Alignment score = 0.000000
TCGTTACCGTTTTTGGCGTACTCTTCTGTTTTTCGGGCACATTAAACTCTTTN
>Bacillus_Fam_1341_52_1 Nr. of seq. 1 Alignment length(with gaps) = 52
Alignment score = 0.000000
CACCAAGAGCTTTCCTTGGCGCAGTAATATAGGTTTCATCTACTAATAACTG
>Bacillus_Fam_1342_52_1 Nr. of seq. 1 Alignment length(with gaps) = 52
Alignment score = 0.000000
GGTCTTCATAGCACCGATGAAGACCTGAAACAGTTGGAAACTGCTTCGTACA

```

>Bacillus\_Fam\_1343\_52\_1 Nr. of seq. 1 Alignment length(with gaps) = 52  
 Alignment score = 0.000000  
 CTCTTCATCTCGCTTATGAAGGGGATTTGGATGAGGTAACTGCCTTGTTTTTC  
 >Bacillus\_Fam\_1344\_52\_1 Nr. of seq. 1 Alignment length(with gaps) = 52  
 Alignment score = 0.000000  
 ATGTCGTCATGAGTGCGATGAAGACACAACTCTCCTGGCGAGCGGAAGAAG  
 >Bacillus\_Fam\_1345\_52\_1 Nr. of seq. 1 Alignment length(with gaps) = 52  
 Alignment score = 0.000000  
 GGAAAACACAGCAAAAGCCGGATAGAAATCCCCTTCATCAAGGCCATGAAGG  
 >Bacillus\_Fam\_1346\_52\_1 Nr. of seq. 1 Alignment length(with gaps) = 52  
 Alignment score = 0.000000  
 GATGAAGACCGTTTAAAGATCCCTCCGNGCCAGAAAAGGTTATCATGGGAGA  
 >Bacillus\_Fam\_1347\_52\_1 Nr. of seq. 1 Alignment length(with gaps) = 52  
 Alignment score = 0.000000  
 ATCTATAAAAAATGGTCATCATGTACGTGATGAAAACCGAAATCTGGTATGTG  
 >Bacillus\_Fam\_1348\_52\_1 Nr. of seq. 1 Alignment length(with gaps) = 52  
 Alignment score = 0.000000  
 CGGTCTTCATGGCCGGGATGAGAACCGATNTTNCTGATTTCTTTGCGGAGAAC  
 >Bacillus\_Fam\_1349\_52\_1 Nr. of seq. 1 Alignment length(with gaps) = 52  
 Alignment score = 0.000000  
 TGGTTTTTCATAAGCGGAATGAAGACCGTTATTAGGGGCTTTGTCCTGCGTAA  
 >Bacillus\_Fam\_1350\_52\_1 Nr. of seq. 1 Alignment length(with gaps) = 52  
 Alignment score = 0.000000  
 GATGAAGACCAATCCATNGGAAGGAGCGCGGGNAAACGGTCATCATCAAGGG  
 >Bacillus\_Fam\_1351\_52\_1 Nr. of seq. 1 Alignment length(with gaps) = 52  
 Alignment score = 0.000000  
 GGTTTTCATAGCTGGAATGAAGACCGAAAGTAACGGTGATAGATCGAGTTTA  
 >Bacillus\_Fam\_1352\_52\_1 Nr. of seq. 1 Alignment length(with gaps) = 52  
 Alignment score = 0.000000  
 TGAGTCTGAATCCGAAGGTTATTTCGGACTCCAGCAAGAGGAAACCCAGGCAT  
 >Bacillus\_Fam\_1353\_52\_1 Nr. of seq. 1 Alignment length(with gaps) = 52  
 Alignment score = 0.000000  
 TCTTCATAAAGGCAATGAAGACCGTTTGGTTGGTTTTTTANAANGNCTTTGG  
 >Bacillus\_Fam\_1354\_52\_1 Nr. of seq. 1 Alignment length(with gaps) = 52  
 Alignment score = 0.000000  
 TTGGTTTTTCATAACGGCGATGATGACCGTTTTGCTGAGTGCTGGCTTGCTTT  
 >Bacillus\_Fam\_1355\_52\_1 Nr. of seq. 1 Alignment length(with gaps) = 52  
 Alignment score = 0.000000  
 TAAAACTTCATGCTTATGGTCCTCATTCAACGGATGATGACCGTTTGCCTTA  
 >Bacillus\_Fam\_1356\_52\_1 Nr. of seq. 1 Alignment length(with gaps) = 52  
 Alignment score = 0.000000  
 ATGATGACCGTTNTTGGTTCATAGAACANAGAAACTGGTCTTCATCTGGGCT  
 >Bacillus\_Fam\_1357\_51\_1 Nr. of seq. 1 Alignment length(with gaps) = 51  
 Alignment score = 0.000000  
 AATACGCAGCAATGAAACCGNAAAAATAGTCCTCAATGCCGCACAAATAAA  
 >Bacillus\_Fam\_1358\_51\_1 Nr. of seq. 1 Alignment length(with gaps) = 51  
 Alignment score = 0.000000  
 GGGGTTACTCATGAGAAAAGTGAGAGTAAGCCCGAGAAAAGAGAAATGCNC  
 >Bacillus\_Fam\_1359\_51\_1 Nr. of seq. 1 Alignment length(with gaps) = 51  
 Alignment score = 0.000000  
 CGTTTTCTCGGGCTTCTACTCTTTTTTCCGCCCCGTAACCCCAAGCATCAT  
 >Bacillus\_Fam\_1360\_51\_1 Nr. of seq. 1 Alignment length(with gaps) = 51  
 Alignment score = 0.000000  
 CTAAACAAGACGAGCAAACACAAAACAAACAACATCAATCTGCTCAAGGTA

```

>Bacillus_Fam_1361_51_1 Nr. of seq. 1 Alignment length(with gaps) = 51
Alignment score = 0.000000
AAAGACAAAACGNGGNGCCGAGACGAAAGAAATGTCCTTCATAGGGTCATG
>Bacillus_Fam_1362_51_1 Nr. of seq. 1 Alignment length(with gaps) = 51
Alignment score = 0.000000
TGAATGAGGACAAAGTAAGCGGGAAAACAGAAACATTGTCCTCGTAGGGCG
>Bacillus_Fam_1363_51_1 Nr. of seq. 1 Alignment length(with gaps) = 51
Alignment score = 0.000000
GATGACAAAACCTTCAATGAACNAAGGATTTCTGTTCATCGGAAAGCTTCAAC
>Bacillus_Fam_1364_51_1 Nr. of seq. 1 Alignment length(with gaps) = 51
Alignment score = 0.000000
TAAAGGACGTTAACGAGTCAATTTAGAGACTAAAGTCCCTATAAACAGCTTN
>Bacillus_Fam_1365_51_1 Nr. of seq. 1 Alignment length(with gaps) = 51
Alignment score = 0.000000
TATCGTCCTATAGAGGGACTTTAAAGGACTTTAATATTGAATGTTGCNAAA
>Bacillus_Fam_1366_51_1 Nr. of seq. 1 Alignment length(with gaps) = 51
Alignment score = 0.000000
GTGACCAAAAAGAAAAAAGAGAGCTACTTCGGTCACTCCAGAGAATTGGA
>Bacillus_Fam_1367_51_1 Nr. of seq. 1 Alignment length(with gaps) = 51
Alignment score = 0.000000
GCACGCTGAGCCNGCGCTTCGTCAAGAAGAGAAAGCAGCGGCTCAACCGGA
>Bacillus_Fam_1368_51_1 Nr. of seq. 1 Alignment length(with gaps) = 51
Alignment score = 0.000000
CTTATCCTCCGTTTTTCGTACCGTATTTTGGCCAGGGAGAATTTTTTCATTC
>Bacillus_Fam_1369_51_1 Nr. of seq. 1 Alignment length(with gaps) = 51
Alignment score = 0.000000
GAAAAAGAGCCGAGCTAGCGGAAGTACGGCGTATAAGGAGTCATGAAGTT
>Bacillus_Fam_1370_51_1 Nr. of seq. 1 Alignment length(with gaps) = 51
Alignment score = 0.000000
TTTAAAGGACAAAAAAGGAAGCCGAAGCTGGAAAGTGTTCCAATAACGAGAG
>Bacillus_Fam_1371_51_1 Nr. of seq. 1 Alignment length(with gaps) = 51
Alignment score = 0.000000
AGTGAAAAGGGAATCAAAGCCCTCAATGATTCCCAAAGAGCCCCAGAACCA
>Bacillus_Fam_1372_51_1 Nr. of seq. 1 Alignment length(with gaps) = 51
Alignment score = 0.000000
AATACGCCGAACCTCCCTTTACTCGGCTCTTTTTTCTGCTTCACAGTTCTA
>Bacillus_Fam_1373_51_1 Nr. of seq. 1 Alignment length(with gaps) = 51
Alignment score = 0.000000
GTGCGTATTCATCTGATTTGGTAATCAAATTTCAACCTGAGCCGAATTACG
>Bacillus_Fam_1374_51_1 Nr. of seq. 1 Alignment length(with gaps) = 51
Alignment score = 0.000000
TTTTTCATTACCTATTATNGTTTATTCAAACCTAATTGAGNGAGTTTCCCT
>Bacillus_Fam_1375_51_1 Nr. of seq. 1 Alignment length(with gaps) = 51
Alignment score = 0.000000
TTGGTCTTCATCCGCTTAATGAAGACCTTTTTTCCGATTTGTTTACACTT
>Bacillus_Fam_1376_51_1 Nr. of seq. 1 Alignment length(with gaps) = 51
Alignment score = 0.000000
CGTTACCTTTTCTTCGTATTTTCCCATTTTTGGTCACATAGACCCCTTCTA
>Bacillus_Fam_1377_51_1 Nr. of seq. 1 Alignment length(with gaps) = 51
Alignment score = 0.000000
GTCACGTAGAACCTCTCTACGTGACCTCTCCCATGCTTTTTTCTCCAAAATA
>Bacillus_Fam_1378_51_1 Nr. of seq. 1 Alignment length(with gaps) = 51
Alignment score = 0.000000
CGCTTTTATCGTCACGTAAAATGATTTCAACGCGTTTTGCTGATAATAAAT

```

>Bacillus\_Fam\_1379\_51\_1 Nr. of seq. 1 Alignment length(with gaps) = 51  
 Alignment score = 0.000000  
 TCCGTTATTTGTCCAAAACCTATGCTACAGCTATTTTNCCGGACACCAGG  
 >Bacillus\_Fam\_1380\_51\_1 Nr. of seq. 1 Alignment length(with gaps) = 51  
 Alignment score = 0.000000  
 GCTTCAGTTTCTTCATCCGAAATCATCTCAGCTGTACCTGCAGGCTCTTTT  
 >Bacillus\_Fam\_1381\_51\_1 Nr. of seq. 1 Alignment length(with gaps) = 51  
 Alignment score = 0.000000  
 ATATTTTTTTGAACGTTCTTCACGTTTGCTAGATCGTTTTTCGCGATCATA  
 >Bacillus\_Fam\_1382\_51\_1 Nr. of seq. 1 Alignment length(with gaps) = 51  
 Alignment score = 0.000000  
 AGTTGTCCATTTGCGGNGGGCTATTGGACAACTTTTTCNGAAAAACACCAG  
 >Bacillus\_Fam\_1383\_51\_1 Nr. of seq. 1 Alignment length(with gaps) = 51  
 Alignment score = 0.000000  
 TTGGACAGCTTCGCGCTATTTTCCAAAAAGTTGTCCATTAGACACAAGCTA  
 >Bacillus\_Fam\_1384\_51\_1 Nr. of seq. 1 Alignment length(with gaps) = 51  
 Alignment score = 0.000000  
 TTTTCTCTAATTACGATATTTCTGTCCAATAGGACCTGGCTATTGGACAGG  
 >Bacillus\_Fam\_1385\_51\_1 Nr. of seq. 1 Alignment length(with gaps) = 51  
 Alignment score = 0.000000  
 CTTGGCGCAAAAAGTTTTCCCGAGGNTGGAGAAATTGCGTTAACGCAGGGT  
 >Bacillus\_Fam\_1386\_51\_1 Nr. of seq. 1 Alignment length(with gaps) = 51  
 Alignment score = 0.000000  
 CTCAGAGACAAAATCCAGGNAAAAAGTAGNGATTTGTCTCTGATCGGGTGT  
 >Bacillus\_Fam\_1387\_51\_1 Nr. of seq. 1 Alignment length(with gaps) = 51  
 Alignment score = 0.000000  
 CTTGCGTCGAATAGAAACGCCCTATTCGCGCATTTCTGTGATTTTCTTTTN  
 >Bacillus\_Fam\_1388\_51\_1 Nr. of seq. 1 Alignment length(with gaps) = 51  
 Alignment score = 0.000000  
 CGCCCCAATTCACCCGAAGAAAAGGAAATACACGTCAANGGTGAATAGAT  
 >Bacillus\_Fam\_1389\_51\_1 Nr. of seq. 1 Alignment length(with gaps) = 51  
 Alignment score = 0.000000  
 GGTCGAATAGAAGCGATCAATTCGACCGTTGCTGGAAAATCCGCTTTGTTT  
 >Bacillus\_Fam\_1390\_51\_1 Nr. of seq. 1 Alignment length(with gaps) = 51  
 Alignment score = 0.000000  
 CTTATACATTTTTTCTTTCTTCCCATGAAAATCTATACGCATCCTCCCTTC  
 >Bacillus\_Fam\_1391\_51\_1 Nr. of seq. 1 Alignment length(with gaps) = 51  
 Alignment score = 0.000000  
 TTCGGACACAGAAAGGGGGAACCCGTGGAATTGAGTCAGAACCCGGNCAAG  
 >Bacillus\_Fam\_1392\_51\_1 Nr. of seq. 1 Alignment length(with gaps) = 51  
 Alignment score = 0.000000  
 TAATCGTTCCCGAAAATGCNGTGTANGAGGCTGGNGGTAATGAATAGGGAG  
 >Bacillus\_Fam\_1393\_51\_1 Nr. of seq. 1 Alignment length(with gaps) = 51  
 Alignment score = 0.000000  
 ATAGAGCGCGTGTCCAGTAATTTATTGGAAAAGGCGTCCTATGAACCATTC  
 >Bacillus\_Fam\_1394\_51\_1 Nr. of seq. 1 Alignment length(with gaps) = 51  
 Alignment score = 0.000000  
 AAAATGGTCCTAGTTCACCAAATGGAACCAAAATCAAGAAAGACAGCGTA  
 >Bacillus\_Fam\_1395\_51\_1 Nr. of seq. 1 Alignment length(with gaps) = 51  
 Alignment score = 0.000000  
 AACTGTGACCAAAAATGGCGGAGAAATCAAAAAAACGGTCACAGAGTGTA  
 >Bacillus\_Fam\_1396\_51\_1 Nr. of seq. 1 Alignment length(with gaps) = 51  
 Alignment score = 0.000000  
 AAAAAAAGTAAAAAACATGTAAAGAGTCTCATAGGAGCATTCATGGGAC

>Bacillus\_Fam\_1397\_51\_1 Nr. of seq. 1 Alignment length(with gaps) = 51  
 Alignment score = 0.000000  
 TAAAAGAGAACTTAGGATGAATAGCTTCCACAAACTGTAAGTGGAAGCATC  
 >Bacillus\_Fam\_1398\_51\_1 Nr. of seq. 1 Alignment length(with gaps) = 51  
 Alignment score = 0.000000  
 GACTTTAGAGNACATTNCTTCTNATACTGGTAATTAAAGGAGCTAAGATT  
 >Bacillus\_Fam\_1399\_51\_1 Nr. of seq. 1 Alignment length(with gaps) = 51  
 Alignment score = 0.000000  
 GGATTTTGAAGAAGGGAAAAGCATGCCCCCAAAGTGCGCTTAGGATACAT  
 >Bacillus\_Fam\_1400\_51\_1 Nr. of seq. 1 Alignment length(with gaps) = 51  
 Alignment score = 0.000000  
 TTCTATTACCTCTATCCTGCTTTTGGCATCACCTTTTCGGCTTCGGGCTT  
 >Bacillus\_Fam\_1401\_51\_1 Nr. of seq. 1 Alignment length(with gaps) = 51  
 Alignment score = 0.000000  
 CCATCCGGAAGTGGTGGAAGATTTTCATCCCCTGCAAGTTCTACCCCAGTC  
 >Bacillus\_Fam\_1402\_51\_1 Nr. of seq. 1 Alignment length(with gaps) = 51  
 Alignment score = 0.000000  
 CATCCTTCACCATGATCACGGGCACTTATCTCCTCTTTGGTTACCTCTTTT  
 >Bacillus\_Fam\_1403\_51\_1 Nr. of seq. 1 Alignment length(with gaps) = 51  
 Alignment score = 0.000000  
 TTTGGGGAACCTATCTCGGCTTTGGTTACCTTTTCCTTGGCTTCGGNTCGA  
 >Bacillus\_Fam\_1404\_51\_1 Nr. of seq. 1 Alignment length(with gaps) = 51  
 Alignment score = 0.000000  
 TTCTTCAACAGCCTCTATTGCTTGTGGGACGGATTCCCTCGGTCATTTCCAC  
 >Bacillus\_Fam\_1405\_50\_1 Nr. of seq. 1 Alignment length(with gaps) = 50  
 Alignment score = 0.000000  
 CGACTGCCACTATTTGGAAAACAAAATGCACACACACTCATTTACCGCCT  
 >Bacillus\_Fam\_1406\_50\_1 Nr. of seq. 1 Alignment length(with gaps) = 50  
 Alignment score = 0.000000  
 TTTAAATCAAAGGAATAGATTGTGGTTCGGGTNAAATCAAGTAGCTCACT  
 >Bacillus\_Fam\_1407\_48\_1 Nr. of seq. 1 Alignment length(with gaps) = 48  
 Alignment score = 0.000000  
 GCGATGATGCCGCAGATGCCGCATCAGATGCCACATCAGGTGCAGGGA  
 >Bacillus\_Fam\_1408\_48\_1 Nr. of seq. 1 Alignment length(with gaps) = 48  
 Alignment score = 0.000000  
 TCAGCCAGAAAACAACGGAAAAGGATATAAACAAGAAAATAGAGAGTC  
 >Bacillus\_Fam\_1409\_48\_1 Nr. of seq. 1 Alignment length(with gaps) = 48  
 Alignment score = 0.000000  
 GGGATGCCGCTAAATCCGGCTCCTGGTACCCCTCCATAACCTGCTGGT  
 >Bacillus\_Fam\_1410\_48\_1 Nr. of seq. 1 Alignment length(with gaps) = 48  
 Alignment score = 0.000000  
 AAACCAACAGAGTCAGCATCATTGAGCAATGCTGCATAATCATCTTGT  
 >Bacillus\_Fam\_1411\_48\_1 Nr. of seq. 1 Alignment length(with gaps) = 48  
 Alignment score = 0.000000  
 TCATTGCTGTCCTGAATACATTGGAGAAGGTATGCTAGAATATGGCC  
 >Bacillus\_Fam\_1412\_48\_1 Nr. of seq. 1 Alignment length(with gaps) = 48  
 Alignment score = 0.000000  
 AGCCCGATGAGAAATTACTATAGAGCGATTGATCAGCACGTGACCGAT  
 >Bacillus\_Fam\_1413\_48\_1 Nr. of seq. 1 Alignment length(with gaps) = 48  
 Alignment score = 0.000000  
 GCTTCTTCTGTTGTTTCCTTCTTGGCCTTCTTCATCTACAGCATCC  
 >Bacillus\_Fam\_1414\_48\_1 Nr. of seq. 1 Alignment length(with gaps) = 48  
 Alignment score = 0.000000  
 GCAAAGAAAGAAGCCGAAGAACAAGCGAAACGAGAGGCTGAAGAACAG

>Bacillus\_Fam\_1415\_48\_1 Nr. of seq. 1 Alignment length(with gaps) = 48  
 Alignment score = 0.000000  
 GGTGTGATGGGAGCAGAGATGCATCATCAGATGCCGATGGGTCAGCCG  
 >Bacillus\_Fam\_1416\_48\_1 Nr. of seq. 1 Alignment length(with gaps) = 48  
 Alignment score = 0.000000  
 TTAGAAAGAAGCAGAGACAGAAGTTCGGAAAGCAGTGTGGACAATGAC  
 >Bacillus\_Fam\_1417\_48\_1 Nr. of seq. 1 Alignment length(with gaps) = 48  
 Alignment score = 0.000000  
 CGGCCTCCCCGCGAATCCTCACGTTTAGGTCCGCGGCTGTTTCCATC  
 >Bacillus\_Fam\_1418\_48\_1 Nr. of seq. 1 Alignment length(with gaps) = 48  
 Alignment score = 0.000000  
 CATCATAAGAAGAGCTGCCGCAAGTCACATCGCAGCAAGCACAGATCG  
 >Bacillus\_Fam\_1419\_48\_1 Nr. of seq. 1 Alignment length(with gaps) = 48  
 Alignment score = 0.000000  
 ATGCCGTGGCAAAATGGGATGATGCCAATGCCTGGACAGCAGGAAGGA  
 >Bacillus\_Fam\_1420\_48\_1 Nr. of seq. 1 Alignment length(with gaps) = 48  
 Alignment score = 0.000000  
 TATAAGAAGGACTACTACTACCATGAGCCTTACAAGAAGCATCACGAG  
 >Bacillus\_Fam\_1421\_48\_1 Nr. of seq. 1 Alignment length(with gaps) = 48  
 Alignment score = 0.000000  
 CTGTTCTTTCATCCGAACCAGGGGCGGTTCTTCTTCCGGCTCATCTC  
 >Bacillus\_Fam\_1422\_47\_1 Nr. of seq. 1 Alignment length(with gaps) = 47  
 Alignment score = 0.000000  
 AAACACGAGTAAGAATATGAATTATTCAGCTACCTTGATTACGTTTA  
 >Bacillus\_Fam\_1423\_45\_1 Nr. of seq. 1 Alignment length(with gaps) = 45  
 Alignment score = 0.000000  
 TTGTTGATTTCTCTTCTTTTTTACCTTTTTTCATCAGCTGAACCGC  
 >Bacillus\_Fam\_1424\_45\_1 Nr. of seq. 1 Alignment length(with gaps) = 45  
 Alignment score = 0.000000  
 CACCATCAAGTACAACAGGTGGATCTCAATCAAGTGGTGGAGGAG  
 >Bacillus\_Fam\_1425\_45\_1 Nr. of seq. 1 Alignment length(with gaps) = 45  
 Alignment score = 0.000000  
 GCCCGAAGCATTAGGGGTCAGNGCAGAAGTGCCAGAGCGTGAGA  
 >Bacillus\_Fam\_1426\_45\_1 Nr. of seq. 1 Alignment length(with gaps) = 45  
 Alignment score = 0.000000  
 CCGGAGTATTAACAGAAATAGAATCACACACATCGACATCGACAA  
 >Bacillus\_Fam\_1427\_45\_1 Nr. of seq. 1 Alignment length(with gaps) = 45  
 Alignment score = 0.000000  
 TCCTTGTTGGTCCAGTGGGACCGATAGGCCCTGGTTCCCCTTGTGA  
 >Bacillus\_Fam\_1428\_45\_1 Nr. of seq. 1 Alignment length(with gaps) = 45  
 Alignment score = 0.000000  
 GAGCAATCTAGTAATTATTGACGGTATCAGCCGTTATCTGAACTT  
 >Bacillus\_Fam\_1429\_45\_1 Nr. of seq. 1 Alignment length(with gaps) = 45  
 Alignment score = 0.000000  
 TCTTGAGTTTGCTGAGATACGTGTTGATTTTGTGACGTTGAGGT  
 >Bacillus\_Fam\_1430\_45\_1 Nr. of seq. 1 Alignment length(with gaps) = 45  
 Alignment score = 0.000000  
 GGAACAGAAAGACAAGGAATGGGTGAAGGAAATGCAGTTCCAGTA  
 >Bacillus\_Fam\_1431\_45\_1 Nr. of seq. 1 Alignment length(with gaps) = 45  
 Alignment score = 0.000000  
 TGTATCGGTGAAACGGGCATTTGCTTTTCTACTTTAGGAAATTCC  
 >Bacillus\_Fam\_1432\_45\_1 Nr. of seq. 1 Alignment length(with gaps) = 45  
 Alignment score = 0.000000  
 GATAAACCGGATGGCGAGAATCCAGATGTAGACAAGCCTGACACG

```

>Bacillus_Fam_1433_45_1 Nr. of seq. 1 Alignment length(with gaps) = 45
Alignment score = 0.000000
TCTGTGCCTTCCGTTTCCTTCGGTTACCGCTTCTGCTCCTGTGTCTG
>Bacillus_Fam_1434_45_1 Nr. of seq. 1 Alignment length(with gaps) = 45
Alignment score = 0.000000
TTTTCTCTTTTAGGAGGAGTTGGATTCTGAAGGCTTNGGAGCCGGT
>Bacillus_Fam_1435_45_1 Nr. of seq. 1 Alignment length(with gaps) = 45
Alignment score = 0.000000
CTCATGAAGAAGATCACGACCACGATCACGACCATGAACACGATG
>Bacillus_Fam_1436_45_1 Nr. of seq. 1 Alignment length(with gaps) = 45
Alignment score = 0.000000
TCCTCTTCATCTATAAAAGAGCTCTCTTCTTGGGGAGAACTGGAT
>Bacillus_Fam_1437_45_1 Nr. of seq. 1 Alignment length(with gaps) = 45
Alignment score = 0.000000
CCATTATTTCTTGCAGAGCTCTTCGGTTGTTCTTCTTGCCCATTC
>Bacillus_Fam_1438_45_1 Nr. of seq. 1 Alignment length(with gaps) = 45
Alignment score = 0.000000
GCTCCGGTTACTCCGGTCGCTCCCGTATCTCCCGTTGCACCTGTG
>Bacillus_Fam_1439_43_1 Nr. of seq. 1 Alignment length(with gaps) = 43
Alignment score = 0.000000
AAAACCTTCTAACAAAGATCCAACCCCAACCCCTAGTTACCCA
>Bacillus_Fam_1440_43_1 Nr. of seq. 1 Alignment length(with gaps) = 43
Alignment score = 0.000000
GGCTGGTTAGATTCCGTTCTTGCTTCTTCGTANATCCAATGAA
>Bacillus_Fam_1441_43_1 Nr. of seq. 1 Alignment length(with gaps) = 43
Alignment score = 0.000000
TCAGTTTTTAAGCTCGGAGACATCTGTTTTTAAGNTTAGAAAACC
>Bacillus_Fam_1442_42_1 Nr. of seq. 1 Alignment length(with gaps) = 42
Alignment score = 0.000000
TGATCATCTTCCTCGTGACCATGCTCCTCATGGCTATGGTCG
>Bacillus_Fam_1443_42_1 Nr. of seq. 1 Alignment length(with gaps) = 42
Alignment score = 0.000000
AGGTTTTTGCTTCAGGTTTAGCTGTTTCGTTGTTTACAGC
>Bacillus_Fam_1444_42_1 Nr. of seq. 1 Alignment length(with gaps) = 42
Alignment score = 0.000000
AATCAAGGAAATCAAACGCCGCCAATAGCGGAAACGGAAAT
>Bacillus_Fam_1445_42_1 Nr. of seq. 1 Alignment length(with gaps) = 42
Alignment score = 0.000000
TTCTCGTGCGGTTGCCGCTCCATCCTGTGCGGCTTTTCCCCT
>Bacillus_Fam_1446_42_1 Nr. of seq. 1 Alignment length(with gaps) = 42
Alignment score = 0.000000
TAACTTTGATCAAATCGCTCGTAACTCGGGCCGAATCGCGCG
>Bacillus_Fam_1447_42_1 Nr. of seq. 1 Alignment length(with gaps) = 42
Alignment score = 0.000000
TCTCTTTTCAGCTCATATTCTTCCGGTTCCTCTTCCACTTTC
>Bacillus_Fam_1448_42_1 Nr. of seq. 1 Alignment length(with gaps) = 42
Alignment score = 0.000000
CTGGACCTATGATGGGTGGGTTTAACCCTCAAGGACCTGGTG
>Bacillus_Fam_1449_42_1 Nr. of seq. 1 Alignment length(with gaps) = 42
Alignment score = 0.000000
CTTCTTCAGGAGTCTCTACTTCTCTCTGTTCTTCTGTTC
>Bacillus_Fam_1450_42_1 Nr. of seq. 1 Alignment length(with gaps) = 42
Alignment score = 0.000000
CAGCCTTTTATCCATCGAGCTGACCTTTTGATCCAGAACGTC

```



```

>Bacillus_Fam_1451_42_1 Nr. of seq. 1 Alignment length(with gaps) = 42
Alignment score = 0.000000
ATTGTTAGAGCTGCGTCGATCATTCTGAACAACGACGGCGACG
>Bacillus_Fam_1452_42_1 Nr. of seq. 1 Alignment length(with gaps) = 42
Alignment score = 0.000000
TTCGCTTTCGGGTTTGCTTTTGGGTCTACCTTCGAATTTCCG
>Bacillus_Fam_1453_42_1 Nr. of seq. 1 Alignment length(with gaps) = 42
Alignment score = 0.000000
TCAAGAATCGCGATGAAATGTCCGGTCGTACAATAGACGAGC
>Bacillus_Fam_1454_42_1 Nr. of seq. 1 Alignment length(with gaps) = 42
Alignment score = 0.000000
TGCGTGAAGTATTGCGGTTTCTTGAAGTANAGCGGCTCTGCT
>Bacillus_Fam_1455_42_1 Nr. of seq. 1 Alignment length(with gaps) = 42
Alignment score = 0.000000
CAACCAAGAGAAGTGGCCCCTGGAGAGGTACCTTCTGAAGCT
>Bacillus_Fam_1456_42_1 Nr. of seq. 1 Alignment length(with gaps) = 42
Alignment score = 0.000000
GATGATGGTGGCCATGCTCATGGTGATGATGCTCACGTTTCAT
>Bacillus_Fam_1457_42_1 Nr. of seq. 1 Alignment length(with gaps) = 42
Alignment score = 0.000000
AAGCGCTTGTCGACCTCAACGAAACGTGCGTCCACTTCATCG
>Bacillus_Fam_1458_42_1 Nr. of seq. 1 Alignment length(with gaps) = 42
Alignment score = 0.000000
TCTCCAGAGTCATCATCGTTTCCGTTCATCCGGATTCTGAATCA
>Bacillus_Fam_1459_42_1 Nr. of seq. 1 Alignment length(with gaps) = 42
Alignment score = 0.000000
TTGTTGTCTCTGGTTGTTATTTGGATCCTGATTGTTCCATTGG
>Bacillus_Fam_1460_42_1 Nr. of seq. 1 Alignment length(with gaps) = 42
Alignment score = 0.000000
CCGGCGGCGGGAACAACGGGGCTGACAATGGCGCCAACAACG
>Bacillus_Fam_1461_42_1 Nr. of seq. 1 Alignment length(with gaps) = 42
Alignment score = 0.000000
GGAGGATCTTCTCACGCGGAAGGATCGAACACAACAGCCAAT
>Bacillus_Fam_1462_42_1 Nr. of seq. 1 Alignment length(with gaps) = 42
Alignment score = 0.000000
CTGTTCAACAGCAATCAGCTCAACAAGAAAAAACTCAGCAGC
>Bacillus_Fam_1463_42_1 Nr. of seq. 1 Alignment length(with gaps) = 42
Alignment score = 0.000000
TCTGCTCTTCGACTTTTATAAATCTTTCATTCTCTTATAAC
>Bacillus_Fam_1464_42_1 Nr. of seq. 1 Alignment length(with gaps) = 42
Alignment score = 0.000000
CGCTCAGCTTCTTGTTTAGCAGCAGCCTGTTCTTGAGCTTTT
>Bacillus_Fam_1465_42_1 Nr. of seq. 1 Alignment length(with gaps) = 42
Alignment score = 0.000000
CAGGTGAAGGAGCCGGAAGGCGAAGGCCAGGGCGGCGGAA
>Bacillus_Fam_1466_42_1 Nr. of seq. 1 Alignment length(with gaps) = 42
Alignment score = 0.000000
GGATTCGTACCACCTTGGTTATTTTCGTTTCCACCATTTGGT
>Bacillus_Fam_1467_42_1 Nr. of seq. 1 Alignment length(with gaps) = 42
Alignment score = 0.000000
AAGAACTTTCTTCTGCCAAGAAAAAGATTCTCTTGGGAAA
>Bacillus_Fam_1468_42_1 Nr. of seq. 1 Alignment length(with gaps) = 42
Alignment score = 0.000000
TGTTTCAGTCTTGATCGCACCGATTTCTTTCCGCATTTCTGAC

```

>Bacillus\_Fam\_1469\_42\_1 Nr. of seq. 1 Alignment length(with gaps) = 42  
 Alignment score = 0.000000  
 TCAAACCGTTTATCCATGCTGTTTCAGACGGCCATCCACATCA  
 >Bacillus\_Fam\_1470\_42\_1 Nr. of seq. 1 Alignment length(with gaps) = 42  
 Alignment score = 0.000000  
 AGCCACTTGTAATTTATCGCTCCTTCTTTCACTGGAACGCG  
 >Bacillus\_Fam\_1471\_42\_1 Nr. of seq. 1 Alignment length(with gaps) = 42  
 Alignment score = 0.000000  
 GCTCTTCTTCTTCCCGCTCCCTCAGAATCGGGCAGTCTCCG  
 >Bacillus\_Fam\_1472\_42\_1 Nr. of seq. 1 Alignment length(with gaps) = 42  
 Alignment score = 0.000000  
 GTCAAACGCAAAATGGTGGTAGCCAGCCAGGTGGAAGTGACG  
 >Bacillus\_Fam\_1473\_42\_1 Nr. of seq. 1 Alignment length(with gaps) = 42  
 Alignment score = 0.000000  
 GGAGGACCGGGTGGNTTTCAGGCANTCCAGGTGGNTTCCCA  
 >Bacillus\_Fam\_1474\_42\_1 Nr. of seq. 1 Alignment length(with gaps) = 42  
 Alignment score = 0.000000  
 GATGTGGGAGGCCTAAACAAAATGTCGAAATGCTAAAAGAC  
 >Bacillus\_Fam\_1475\_42\_1 Nr. of seq. 1 Alignment length(with gaps) = 42  
 Alignment score = 0.000000  
 CCTGCTACGTTTGGCTGTCCGTGATACGGATTTTCTGATGCG  
 >Bacillus\_Fam\_1476\_42\_1 Nr. of seq. 1 Alignment length(with gaps) = 42  
 Alignment score = 0.000000  
 GGAATTGCACCGATAACAACGATAATTGCACCGTTGACCTTG  
 >Bacillus\_Fam\_1477\_42\_1 Nr. of seq. 1 Alignment length(with gaps) = 42  
 Alignment score = 0.000000  
 GCTTTCGTTTGTGATGCGTAGAGTATCTCGAATCTTCCTCGT  
 >Bacillus\_Fam\_1478\_42\_1 Nr. of seq. 1 Alignment length(with gaps) = 42  
 Alignment score = 0.000000  
 CAGGAGTCGGACAATTAGTTGACGGACAAAAACAGCGGTTG  
 >Bacillus\_Fam\_1479\_42\_1 Nr. of seq. 1 Alignment length(with gaps) = 42  
 Alignment score = 0.000000  
 GAGCTTCAATCCGACAAGAGGAGCGCTCATTCGGACAGGAGG  
 >Bacillus\_Fam\_1480\_42\_1 Nr. of seq. 1 Alignment length(with gaps) = 42  
 Alignment score = 0.000000  
 TGATCGGTAAATCCTCTGACATGAGCGATAACCATCTCTCACT  
 >Bacillus\_Fam\_1481\_42\_1 Nr. of seq. 1 Alignment length(with gaps) = 42  
 Alignment score = 0.000000  
 ATTTCTGCTAGTGCGCCTTTGGTTTCTGCATGTAGATCTCCG  
 >Bacillus\_Fam\_1482\_42\_1 Nr. of seq. 1 Alignment length(with gaps) = 42  
 Alignment score = 0.000000  
 TTGAAGTCGACAAACGGTTTGATGCTGTTGATCAAAAATTTA  
 >Bacillus\_Fam\_1483\_42\_1 Nr. of seq. 1 Alignment length(with gaps) = 42  
 Alignment score = 0.000000  
 TTATTTAACAGGTAGCAGAATTAACATAACAGAGTTTCGATT  
 >Bacillus\_Fam\_1484\_42\_1 Nr. of seq. 1 Alignment length(with gaps) = 42  
 Alignment score = 0.000000  
 GTTGGCCGATATATCGATTGTGGTGGCGCAATAACATGCTCA  
 >Bacillus\_Fam\_1485\_42\_1 Nr. of seq. 1 Alignment length(with gaps) = 42  
 Alignment score = 0.000000  
 AAGTGCGTCAATTACTTATCCAGCTGCGTCAAAAAGTTCGCC  
 >Bacillus\_Fam\_1486\_42\_1 Nr. of seq. 1 Alignment length(with gaps) = 42  
 Alignment score = 0.000000  
 TTTGATAAAATTGAAACTCGACTTAATAATATGGATCAGCGG

```

>Bacillus_Fam_1487_42_1 Nr. of seq. 1 Alignment length(with gaps) = 42
Alignment score = 0.000000
AGAAACGCCAGGAGATAACGAAGAACTCCTGGAGATAATGA
>Bacillus_Fam_1488_42_1 Nr. of seq. 1 Alignment length(with gaps) = 42
Alignment score = 0.000000
GCGAATTTCCGNGCCCAATGNGCGAATTATCGNACCTTACTN
>Bacillus_Fam_1489_42_1 Nr. of seq. 1 Alignment length(with gaps) = 42
Alignment score = 0.000000
GTGATCATTCGGCCGGCGGTTTGAAAATCATTGGTTGATGAC
>Bacillus_Fam_1490_42_1 Nr. of seq. 1 Alignment length(with gaps) = 42
Alignment score = 0.000000
TATTTCGCCGTTCTNCTCNATTTATTGGACATTANCNGCACTT
>Bacillus_Fam_1491_42_1 Nr. of seq. 1 Alignment length(with gaps) = 42
Alignment score = 0.000000
ACATATCTATGCTGATAAAAGGCAATTACCCCTTTAAGTAG
>Bacillus_Fam_1492_42_1 Nr. of seq. 1 Alignment length(with gaps) = 42
Alignment score = 0.000000
CTCGCCAATTCGGCACTTTTACTCGCGAGTTTGNAGCTGTTTA
>Bacillus_Fam_1493_42_1 Nr. of seq. 1 Alignment length(with gaps) = 42
Alignment score = 0.000000
TTTTTCGGCCTGCACTCAACTTAATTCGACCTGCATCCACTT
>Bacillus_Fam_1494_42_1 Nr. of seq. 1 Alignment length(with gaps) = 42
Alignment score = 0.000000
GTTGCGCAATANGGTANTGTTTTAGCGCAATTCCGTGTGNAA
>Bacillus_Fam_1495_42_1 Nr. of seq. 1 Alignment length(with gaps) = 42
Alignment score = 0.000000
TCGTAGCATTTTTTCTTCTTACAGCAAAAATCTACGTGATCG
>Bacillus_Fam_1496_42_1 Nr. of seq. 1 Alignment length(with gaps) = 42
Alignment score = 0.000000
TTTGGTCCCATATATGCTGGCATTGTTTGTGGGAAGTTTGCA
>Bacillus_Fam_1497_42_1 Nr. of seq. 1 Alignment length(with gaps) = 42
Alignment score = 0.000000
GAAGTAGAAGATCTAAAAGCAGGTCAAACGAAGTTAACAACG
>Bacillus_Fam_1498_42_1 Nr. of seq. 1 Alignment length(with gaps) = 42
Alignment score = 0.000000
TTCTTCTTCAGCAACGGTGTTAACTTCATCCTCAGGAAGGTA
>Bacillus_Fam_1499_42_1 Nr. of seq. 1 Alignment length(with gaps) = 42
Alignment score = 0.000000
TACTTACTTGTGACCATTCTCCACTCTTTCCAAACGTTTCGT
>Bacillus_Fam_1500_42_1 Nr. of seq. 1 Alignment length(with gaps) = 42
Alignment score = 0.000000
AGTTCTTTTCGTGTCTGCTTTTAATAGCCGGACGTCTCCTTTT
>Bacillus_Fam_1501_42_1 Nr. of seq. 1 Alignment length(with gaps) = 42
Alignment score = 0.000000
GTCACTTACATTGGTTTTCAATTCACCAACATCGGTTGTCAG
>Bacillus_Fam_1502_42_1 Nr. of seq. 1 Alignment length(with gaps) = 42
Alignment score = 0.000000
TTTACTCCGATCCTCTTATACTTTACTAACAACCACCTATAC
>Bacillus_Fam_1503_42_1 Nr. of seq. 1 Alignment length(with gaps) = 42
Alignment score = 0.000000
GCTACTGAAGACACTCATTCTCATGACGATGAAGAGAGTCAT
>Bacillus_Fam_1504_42_1 Nr. of seq. 1 Alignment length(with gaps) = 42
Alignment score = 0.000000
CGGAAGACGGGGAGAACGCCGAAGGAGAAGCGCCAAGTCCGC

```

```

>Bacillus_Fam_1505_42_1 Nr. of seq. 1 Alignment length(with gaps) = 42
Alignment score = 0.000000
AGAGCAGTGCAGACAGCGCTGCGTCGTGCGAAGCACAAAAAAG
>Bacillus_Fam_1506_42_1 Nr. of seq. 1 Alignment length(with gaps) = 42
Alignment score = 0.000000
GCCGAATCCTGGAGTCGCATACGGAGAACTGGACGAACACG
>Bacillus_Fam_1507_42_1 Nr. of seq. 1 Alignment length(with gaps) = 42
Alignment score = 0.000000
ATCAGCCAACTTCGGGCGAGAATCAACCAAGCTTGGCGAAAA
>Bacillus_Fam_1508_42_1 Nr. of seq. 1 Alignment length(with gaps) = 42
Alignment score = 0.000000
GAAAAGCGTTTTGACGGTTTTAGAAGGGCGTATTGATGGGCTA
>Bacillus_Fam_1509_41_1 Nr. of seq. 1 Alignment length(with gaps) = 41
Alignment score = 0.000000
TTTGCGTCTTCTGATGAGNGATTTCACCGGTTTGGTGGCA
>Bacillus_Fam_1510_41_1 Nr. of seq. 1 Alignment length(with gaps) = 41
Alignment score = 0.000000
AATATTGGAATTTGCTTCTGAAAATTTTCAGGGTTAGTTCCC
>Bacillus_Fam_1511_41_1 Nr. of seq. 1 Alignment length(with gaps) = 41
Alignment score = 0.000000
TATACGAGAGGTGGAGCTGCTATAAGTGAGTGGCACCTGTC
>Bacillus_Fam_1512_41_1 Nr. of seq. 1 Alignment length(with gaps) = 41
Alignment score = 0.000000
GATTTATCAGCCAAAACTCACTCTTTTCAGCCAAACTTCC
>Bacillus_Fam_1513_41_1 Nr. of seq. 1 Alignment length(with gaps) = 41
Alignment score = 0.000000
TCGATCGATAAATCTCAAAGTCGATGAATAAACAGGCAAC
>Bacillus_Fam_1514_41_1 Nr. of seq. 1 Alignment length(with gaps) = 41
Alignment score = 0.000000
TTTATCAATCACTTTCCCCTCGTTATCCATCACTTTCACAA
>Bacillus_Fam_1515_41_1 Nr. of seq. 1 Alignment length(with gaps) = 41
Alignment score = 0.000000
TGGACAATTCGGCGGGATTGTGACCAAGCGGCGGCCAAGTC
>Bacillus_Fam_1516_41_1 Nr. of seq. 1 Alignment length(with gaps) = 41
Alignment score = 0.000000
TTGCGGGCCGACCTAACCTTTACATGCCGATTCTTATA
>Bacillus_Fam_1517_41_1 Nr. of seq. 1 Alignment length(with gaps) = 41
Alignment score = 0.000000
CACTTTTTCACACCAAAATCGAAGTTTGCGGGCCGGTTCAAA
>Bacillus_Fam_1518_41_1 Nr. of seq. 1 Alignment length(with gaps) = 41
Alignment score = 0.000000
AAAAAGTGACCGCATTATCACCTGTTTTGACTGAATAAACG
>Bacillus_Fam_1519_41_1 Nr. of seq. 1 Alignment length(with gaps) = 41
Alignment score = 0.000000
AATTCGTCCTACATGGNAANAATTCGACCGTAACCGGCAAN
>Bacillus_Fam_1520_41_1 Nr. of seq. 1 Alignment length(with gaps) = 41
Alignment score = 0.000000
CTGAAGGTCGATTTATTCCGACCCACGGACGAATTCATTCA
>Bacillus_Fam_1521_41_1 Nr. of seq. 1 Alignment length(with gaps) = 41
Alignment score = 0.000000
GAGACGCAAAAGTAGTTGCAGCTTACGCAAAAAACAGTGGA
>Bacillus_Fam_1522_41_1 Nr. of seq. 1 Alignment length(with gaps) = 41
Alignment score = 0.000000
TAAATATTTGCGTCAGCCTCAGTGATTTAAGCGTCACCATT

```

```

>Bacillus_Fam_1523_41_1 Nr. of seq. 1 Alignment length(with gaps) = 41
Alignment score = 0.000000
TGCATATATTCGCCGTCCTCAAGCAGATATTGGACAAAACC
>Bacillus_Fam_1524_41_1 Nr. of seq. 1 Alignment length(with gaps) = 41
Alignment score = 0.000000
AGGGAAGCAGGACGAATAAATTCGCGGACGGACGGAAAAAG
>Bacillus_Fam_1525_41_1 Nr. of seq. 1 Alignment length(with gaps) = 41
Alignment score = 0.000000
GGACGAATTCTCTCGACGGTAGGTCTGAATTAAACCTGTTTG
>Bacillus_Fam_1526_41_1 Nr. of seq. 1 Alignment length(with gaps) = 41
Alignment score = 0.000000
GGACGGATTATTTTCATCCCAGGTCGGATTCCACGCGCTGTC
>Bacillus_Fam_1527_41_1 Nr. of seq. 1 Alignment length(with gaps) = 41
Alignment score = 0.000000
TTCGACCTAAACTCCATTTTTTCCGGCCCACTATCGATTAA
>Bacillus_Fam_1528_41_1 Nr. of seq. 1 Alignment length(with gaps) = 41
Alignment score = 0.000000
GATATAATTCCAGTTTCGGCGATATATTGCCGGTTTTTCGTA
>Bacillus_Fam_1529_41_1 Nr. of seq. 1 Alignment length(with gaps) = 41
Alignment score = 0.000000
ATATTCCGGCCTTACCCGCTGGTTTCCGGCCTGCTTCATCG
>Bacillus_Fam_1530_41_1 Nr. of seq. 1 Alignment length(with gaps) = 41
Alignment score = 0.000000
ATTGGGTCGATTTATCTCCTGTTAGGACGATTTATCCCCGC
>Bacillus_Fam_1531_41_1 Nr. of seq. 1 Alignment length(with gaps) = 41
Alignment score = 0.000000
GTAAGGAAGTCGCGCAATCCCCAGGAAAGAAGCGCAATGCA
>Bacillus_Fam_1532_41_1 Nr. of seq. 1 Alignment length(with gaps) = 41
Alignment score = 0.000000
AAAAGTAGCGGATAAAACCCAAAAGTTGTTGGATAAATCCC
>Bacillus_Fam_1533_41_1 Nr. of seq. 1 Alignment length(with gaps) = 41
Alignment score = 0.000000
TTCTCGTGCTTCAAATGGAAGCATGAGAACCGTCCCACTGC
>Bacillus_Fam_1534_40_1 Nr. of seq. 1 Alignment length(with gaps) = 40
Alignment score = 0.000000
CATGAAGAAGACGAACATGAGCATCACGAGCATGAGGGGC
>Bacillus_Fam_1535_40_1 Nr. of seq. 1 Alignment length(with gaps) = 40
Alignment score = 0.000000
GATTTGCGTCTGCATTTTCGTTTTTTGCGTCGCACCCGGCA
>Bacillus_Fam_1536_40_1 Nr. of seq. 1 Alignment length(with gaps) = 40
Alignment score = 0.000000
ATCCACTTATTTTAACTTTGTCCGAGTTATTGGCAGATTG
>Bacillus_Fam_1537_40_1 Nr. of seq. 1 Alignment length(with gaps) = 40
Alignment score = 0.000000
ACGCATAAATCCTGGAACCGATGCAAATAACTTGGATCCG
>Bacillus_Fam_1538_40_1 Nr. of seq. 1 Alignment length(with gaps) = 40
Alignment score = 0.000000
ATTTTAAATTGCGATTACACGAATTTATTTGCCATTTCCC
>Bacillus_Fam_1539_39_1 Nr. of seq. 1 Alignment length(with gaps) = 39
Alignment score = 0.000000
TTATCTTTAGATTTCCACCAATCGTCATCACAATTGTGC
>Bacillus_Fam_1540_39_1 Nr. of seq. 1 Alignment length(with gaps) = 39
Alignment score = 0.000000
TCTTCTTTTGCCGCTTGCTCCTCAGCTTTTCGTTTTGCT

```

```

>Bacillus_Fam_1541_39_1 Nr. of seq. 1 Alignment length(with gaps) = 39
Alignment score = 0.000000
TTCATGCCTTCCATATCATGAGAAGTGTGCTCGTCCATA
>Bacillus_Fam_1542_39_1 Nr. of seq. 1 Alignment length(with gaps) = 39
Alignment score = 0.000000
CGCCTGGATTGCCCCGATCTTCAGGATCCGGCTCCTCTC
>Bacillus_Fam_1543_39_1 Nr. of seq. 1 Alignment length(with gaps) = 39
Alignment score = 0.000000
TCTGGTAATTTGTTAGTTGCTTCCTCTTCATGTGCAAGC
>Bacillus_Fam_1544_39_1 Nr. of seq. 1 Alignment length(with gaps) = 39
Alignment score = 0.000000
GCGCTTTTCTTATGCTTGTCGCCGATAAACAGGCGCCTT
>Bacillus_Fam_1545_39_1 Nr. of seq. 1 Alignment length(with gaps) = 39
Alignment score = 0.000000
TTACCATTATCAGAGCCACTGCCATTGTTGTTGTTGTTA
>Bacillus_Fam_1546_39_1 Nr. of seq. 1 Alignment length(with gaps) = 39
Alignment score = 0.000000
CTTTTCCTGAAGTCTACGGATCCTGTGTAGTATGGTGCG
>Bacillus_Fam_1547_39_1 Nr. of seq. 1 Alignment length(with gaps) = 39
Alignment score = 0.000000
GCTGGTTGCTGCTGCATGCCACCCATCGGTTGTTGGTAC
>Bacillus_Fam_1548_39_1 Nr. of seq. 1 Alignment length(with gaps) = 39
Alignment score = 0.000000
CTCCGTATCCAGGCATTGCTCCATAGCCCGCTGGGGCTG
>Bacillus_Fam_1549_39_1 Nr. of seq. 1 Alignment length(with gaps) = 39
Alignment score = 0.000000
AAACCTGGCTGAGCGCCATAAGGAACTCCTGCTGCGGCG
>Bacillus_Fam_1550_39_1 Nr. of seq. 1 Alignment length(with gaps) = 39
Alignment score = 0.000000
CAAAGTCTCATAGCATGCTGATCATTGACTACATCAATG
>Bacillus_Fam_1551_39_1 Nr. of seq. 1 Alignment length(with gaps) = 39
Alignment score = 0.000000
TTCACCTACTCTTTGCTTCATTGCAGTTAAGTCCGTCAA
>Bacillus_Fam_1552_39_1 Nr. of seq. 1 Alignment length(with gaps) = 39
Alignment score = 0.000000
CTCAAGCAAATCAGTCAATGATGCCAATGAATATAGGGC
>Bacillus_Fam_1553_39_1 Nr. of seq. 1 Alignment length(with gaps) = 39
Alignment score = 0.000000
AGGATATTGACCAGGGCCTCCTCCTTGGGGCGGCAGTCC
>Bacillus_Fam_1554_39_1 Nr. of seq. 1 Alignment length(with gaps) = 39
Alignment score = 0.000000
GGAATGGGAACAGGAGGCTATCCCGGCGGAGGATTTCCA
>Bacillus_Fam_1555_39_1 Nr. of seq. 1 Alignment length(with gaps) = 39
Alignment score = 0.000000
GGGGGCTGTCCCCCGCTGTTTTAACGCATTACTCCGCC
>Bacillus_Fam_1556_39_1 Nr. of seq. 1 Alignment length(with gaps) = 39
Alignment score = 0.000000
AGAATCAACAGAAGAAATTCAAGCAGTAGCAGAGGAAGT
>Bacillus_Fam_1557_39_1 Nr. of seq. 1 Alignment length(with gaps) = 39
Alignment score = 0.000000
TCTTTCTTCTCTTCAGAAGAACCACTTGTTGATTTCTCT
>Bacillus_Fam_1558_39_1 Nr. of seq. 1 Alignment length(with gaps) = 39
Alignment score = 0.000000
TTTTCTTCAGGAGCTACAGTTTCGTTACCTGTTTCAGGT

```

```

>Bacillus_Fam_1559_39_1 Nr. of seq. 1 Alignment length(with gaps) = 39
Alignment score = 0.000000
GCAGGTAAAGGTGGCGCAGGAGCAGGCGAAGGTCCAGGA
>Bacillus_Fam_1560_39_1 Nr. of seq. 1 Alignment length(with gaps) = 39
Alignment score = 0.000000
CAAAACCACCAGTAGACCCACCAACAGATCCAGGAGATA
>Bacillus_Fam_1561_39_1 Nr. of seq. 1 Alignment length(with gaps) = 39
Alignment score = 0.000000
TCTGCTGCGGGAACGGTGTGTCCGGTGATGCGTCCGTCT
>Bacillus_Fam_1562_39_1 Nr. of seq. 1 Alignment length(with gaps) = 39
Alignment score = 0.000000
GGCATATTTGGCATCGGTTTCATTTCGGCATTGGCATGTTC
>Bacillus_Fam_1563_39_1 Nr. of seq. 1 Alignment length(with gaps) = 39
Alignment score = 0.000000
CAAAGATAGAAGAGAAGAAAACCTGAAGATAAAGAAACAG
>Bacillus_Fam_1564_39_1 Nr. of seq. 1 Alignment length(with gaps) = 39
Alignment score = 0.000000
CCTTGACCTCCCGGCATCATCGAAATCCTCCAGGCTGA
>Bacillus_Fam_1565_39_1 Nr. of seq. 1 Alignment length(with gaps) = 39
Alignment score = 0.000000
AGATCTGGTTCGTTCTCGTAGATCCCGCGTTCTGGAGGC
>Bacillus_Fam_1566_39_1 Nr. of seq. 1 Alignment length(with gaps) = 39
Alignment score = 0.000000
CCTGGCATCATTGGCTGGCCGCTCATTTCCTTGACCCATT
>Bacillus_Fam_1567_39_1 Nr. of seq. 1 Alignment length(with gaps) = 39
Alignment score = 0.000000
TGATCATGACTATGACTGTGACCTTCGTGACTGTGTTCG
>Bacillus_Fam_1568_39_1 Nr. of seq. 1 Alignment length(with gaps) = 39
Alignment score = 0.000000
GGATGGGGAAGCGGATTCCCACAAACACCAGGCCAAAGC
>Bacillus_Fam_1569_39_1 Nr. of seq. 1 Alignment length(with gaps) = 39
Alignment score = 0.000000
CAAATAAAATGAGAGTTTCGCAAAAATAAAGCGTTCTTG
>Bacillus_Fam_1570_39_1 Nr. of seq. 1 Alignment length(with gaps) = 39
Alignment score = 0.000000
AAGCTGTAGAGAAGCAGGAACCGGCCAAGGAAGCAGCAC
>Bacillus_Fam_1571_39_1 Nr. of seq. 1 Alignment length(with gaps) = 39
Alignment score = 0.000000
TGCATTGGCATTTGACCTTGATCTGGCATATATGGTTGC
>Bacillus_Fam_1572_39_1 Nr. of seq. 1 Alignment length(with gaps) = 39
Alignment score = 0.000000
TTCTGCGGAGAACGGCATGATCTGCGCGTGCCTCTCGTGC
>Bacillus_Fam_1573_39_1 Nr. of seq. 1 Alignment length(with gaps) = 39
Alignment score = 0.000000
TTTGTGTTTGCGTTTGAGCTGGTTGCTTTTCTACCGGCT
>Bacillus_Fam_1574_39_1 Nr. of seq. 1 Alignment length(with gaps) = 39
Alignment score = 0.000000
GCTTTAGAGTTGAATCTGTATCAGAATTATTTGAATCGT
>Bacillus_Fam_1575_39_1 Nr. of seq. 1 Alignment length(with gaps) = 39
Alignment score = 0.000000
CAACAACCTGGTGAGACAACCTGGAGGAACAACCGGCAGCA
>Bacillus_Fam_1576_39_1 Nr. of seq. 1 Alignment length(with gaps) = 39
Alignment score = 0.000000
TGTGGTGCCATTTGATGCGGTTGATACGGCATCGCCTGC

```

```

>Bacillus_Fam_1577_39_1 Nr. of seq. 1 Alignment length(with gaps) = 39
Alignment score = 0.000000
CATGTTCTTCTTCATGAGCAGCCTCAGTTTCATCATGTG
>Bacillus_Fam_1578_39_1 Nr. of seq. 1 Alignment length(with gaps) = 39
Alignment score = 0.000000
AAAACAACAACAAGAGCAGCAACAGCAGCAGGCCCAACA
>Bacillus_Fam_1579_39_1 Nr. of seq. 1 Alignment length(with gaps) = 39
Alignment score = 0.000000
TCTTCTTCTCATGGGCATGTTTCATCGTCAGCGTGNTGC
>Bacillus_Fam_1580_39_1 Nr. of seq. 1 Alignment length(with gaps) = 39
Alignment score = 0.000000
GCTTTCTTCCATTCTCGGTTCCGCTTTTGCGTCCCTGCT
>Bacillus_Fam_1581_39_1 Nr. of seq. 1 Alignment length(with gaps) = 39
Alignment score = 0.000000
CACGGCTGGCCGGGTCAAGGCGGGTCTGGCTCCGGCGGG
>Bacillus_Fam_1582_39_1 Nr. of seq. 1 Alignment length(with gaps) = 39
Alignment score = 0.000000
CCCTGCATATGATGTCCGTGTCCCATATCCGGCATGTTT
>Bacillus_Fam_1583_39_1 Nr. of seq. 1 Alignment length(with gaps) = 39
Alignment score = 0.000000
CGTTCGGCTTCTTCCGCAGCAATGCGCTCTTCCTCCTCA
>Bacillus_Fam_1584_39_1 Nr. of seq. 1 Alignment length(with gaps) = 39
Alignment score = 0.000000
TATCAACCAGCACCGTTTCCACAAGGTGGTCAAATGGGA
>Bacillus_Fam_1585_38_1 Nr. of seq. 1 Alignment length(with gaps) = 38
Alignment score = 0.000000
TTTGCTTCGTAGTCTTCCCTGTTTCTTCCTCTGCCAGC
>Bacillus_Fam_1586_37_1 Nr. of seq. 1 Alignment length(with gaps) = 37
Alignment score = 0.000000
GAAATCGGCCTTATTGCACGTTATCGGGCTTGTTGCA
>Bacillus_Fam_1587_36_1 Nr. of seq. 1 Alignment length(with gaps) = 36
Alignment score = 0.000000
AAAACCTGATACGGGAGGAAATCCAGACACAGGAGG
>Bacillus_Fam_1588_36_1 Nr. of seq. 1 Alignment length(with gaps) = 36
Alignment score = 0.000000
ATGGATCAAAACGTGCATCCGCAGCAATGGCCGCAA
>Bacillus_Fam_1589_36_1 Nr. of seq. 1 Alignment length(with gaps) = 36
Alignment score = 0.000000
TTTTGTGAGAACGTGATTTTTTATGGCTGCGGGATT
>Bacillus_Fam_1590_36_1 Nr. of seq. 1 Alignment length(with gaps) = 36
Alignment score = 0.000000
ATGCAGGGTATGCAGGGTAGAGCTGGCCTGGGGGGT
>Bacillus_Fam_1591_36_1 Nr. of seq. 1 Alignment length(with gaps) = 36
Alignment score = 0.000000
ACAGGTGATACCGGGGCNACCGGAGTAACNGGAGCA
>Bacillus_Fam_1592_36_1 Nr. of seq. 1 Alignment length(with gaps) = 36
Alignment score = 0.000000
AAAAGGGAATTGGAAGTGCAGTCAGAACAAACAGAGA
>Bacillus_Fam_1593_36_1 Nr. of seq. 1 Alignment length(with gaps) = 36
Alignment score = 0.000000
CTTCTGGTTTATTGTTATCAACAAGTGGTTGATCTG
>Bacillus_Fam_1594_36_1 Nr. of seq. 1 Alignment length(with gaps) = 36
Alignment score = 0.000000
TCGCTTTGATTTTGGTTTTGGGACAAGCCCTCGTCC

```



```

>Bacillus_Fam_1595_36_1 Nr. of seq. 1 Alignment length(with gaps) = 36
Alignment score = 0.000000
TTTTTCATCCAAAGGGCAGCCGAAAAGCAAACCAGG
>Bacillus_Fam_1596_36_1 Nr. of seq. 1 Alignment length(with gaps) = 36
Alignment score = 0.000000
CAGACATATCAACCAAATCAAATGACGATGCCACAA
>Bacillus_Fam_1597_36_1 Nr. of seq. 1 Alignment length(with gaps) = 36
Alignment score = 0.000000
CTATCTCTTCAGTTACTTCGACTTCTGGAGTTACAG
>Bacillus_Fam_1598_36_1 Nr. of seq. 1 Alignment length(with gaps) = 36
Alignment score = 0.000000
CCGCTTCCTGGAGCATCTGGTTGATTTCTTCTTGG
>Bacillus_Fam_1599_36_1 Nr. of seq. 1 Alignment length(with gaps) = 36
Alignment score = 0.000000
CTTCTGCAACTGGTTGTTCTTCAGCGACTGGCCCTT
>Bacillus_Fam_1600_36_1 Nr. of seq. 1 Alignment length(with gaps) = 36
Alignment score = 0.000000
GGGCGGATTCCCTGGTCANGGTGGNCATGGNGGAAT
>Bacillus_Fam_1601_36_1 Nr. of seq. 1 Alignment length(with gaps) = 36
Alignment score = 0.000000
TCCAAAGGCAGTGGTGGATCGAAAGGAAGTCATGGC
>Bacillus_Fam_1602_36_1 Nr. of seq. 1 Alignment length(with gaps) = 36
Alignment score = 0.000000
CTGTTATTTCCGCCACTTCGACTACGTCATCTACAC
>Bacillus_Fam_1603_36_1 Nr. of seq. 1 Alignment length(with gaps) = 36
Alignment score = 0.000000
GTGTCATCCCCAGTACCTGGACTTCCTCCATTATCC
>Bacillus_Fam_1604_36_1 Nr. of seq. 1 Alignment length(with gaps) = 36
Alignment score = 0.000000
GTTTCTTCTCTACTGCTTCTTCCGGCGCTTCTGAA
>Bacillus_Fam_1605_36_1 Nr. of seq. 1 Alignment length(with gaps) = 36
Alignment score = 0.000000
ACTAGCTCTTCTTCAAATGCTTCTCTGTTTCCGCA
>Bacillus_Fam_1606_36_1 Nr. of seq. 1 Alignment length(with gaps) = 36
Alignment score = 0.000000
GCTTCAAGAAACACCATTGTGACTGCTGTGACAAGT
>Bacillus_Fam_1607_36_1 Nr. of seq. 1 Alignment length(with gaps) = 36
Alignment score = 0.000000
TGCAGCAGCAGGAAGCACGGAAGCATGAGGAGACGT
>Bacillus_Fam_1608_36_1 Nr. of seq. 1 Alignment length(with gaps) = 36
Alignment score = 0.000000
ACAAGCATGATGACTGTAATAAACGAGACAGAAACG
>Bacillus_Fam_1609_36_1 Nr. of seq. 1 Alignment length(with gaps) = 36
Alignment score = 0.000000
CGATGCATGCTCAGCCAATGATGTACCCAGACAATG
>Bacillus_Fam_1610_36_1 Nr. of seq. 1 Alignment length(with gaps) = 36
Alignment score = 0.000000
CGAAGAAACCAGACGGATACAAAAGGATGACGATT
>Bacillus_Fam_1611_36_1 Nr. of seq. 1 Alignment length(with gaps) = 36
Alignment score = 0.000000
TCTTCTTCGGAGTGAGCGGCTTCTTCGTCATGGTGC
>Bacillus_Fam_1612_36_1 Nr. of seq. 1 Alignment length(with gaps) = 36
Alignment score = 0.000000
GAACCGAAAACAGAAAAGCCAGATGGTAAACCAGAA

```

>Bacillus\_Fam\_1613\_36\_1 Nr. of seq. 1 Alignment length(with gaps) = 36  
 Alignment score = 0.000000  
 GTAGGTCCAGTCGGTCCAAGGTCGCCGGTAGCACCT  
 >Bacillus\_Fam\_1614\_36\_1 Nr. of seq. 1 Alignment length(with gaps) = 36  
 Alignment score = 0.000000  
 TTTTCCTCCGGCTCCTGTTCCAGGACGAAATCCGGC  
 >Bacillus\_Fam\_1615\_36\_1 Nr. of seq. 1 Alignment length(with gaps) = 36  
 Alignment score = 0.000000  
 CCGCAAATGGGCTATGGCCCGCAAGCTGGATTCGCC  
 >Bacillus\_Fam\_1616\_36\_1 Nr. of seq. 1 Alignment length(with gaps) = 36  
 Alignment score = 0.000000  
 GGAGGAGGTCAACCGCCGCGCGACCACCACAAGGG  
 >Bacillus\_Fam\_1617\_36\_1 Nr. of seq. 1 Alignment length(with gaps) = 36  
 Alignment score = 0.000000  
 GAAGATGATCAATCGGACACCGATGACACAGAAGGG  
 >Bacillus\_Fam\_1618\_36\_1 Nr. of seq. 1 Alignment length(with gaps) = 36  
 Alignment score = 0.000000  
 CAATGGGACGGACATGGCGGAGGTCATGGTGGCGGT  
 >Bacillus\_Fam\_1619\_36\_1 Nr. of seq. 1 Alignment length(with gaps) = 36  
 Alignment score = 0.000000  
 TTTCTCGCTCCGTCATTTTCTTCCGGAGACTCTG  
 >Bacillus\_Fam\_1620\_36\_1 Nr. of seq. 1 Alignment length(with gaps) = 36  
 Alignment score = 0.000000  
 TCTTCGCCTTCGACTGGTTCTTCTCCCTCAACTGGC  
 >Bacillus\_Fam\_1621\_36\_1 Nr. of seq. 1 Alignment length(with gaps) = 36  
 Alignment score = 0.000000  
 TGTTCGTGCTTTTGNGCTTGTCACAGGTTTCGATAC  
 >Bacillus\_Fam\_1622\_36\_1 Nr. of seq. 1 Alignment length(with gaps) = 36  
 Alignment score = 0.000000  
 AGAGAAAATAAACAAGAACAAGCAAACCAACAGGCA  
 >Bacillus\_Fam\_1623\_36\_1 Nr. of seq. 1 Alignment length(with gaps) = 36  
 Alignment score = 0.000000  
 TTCTTCTGTTACAACCTCAGTAGNTTCGTTAGTTGC  
 >Bacillus\_Fam\_1624\_36\_1 Nr. of seq. 1 Alignment length(with gaps) = 36  
 Alignment score = 0.000000  
 GGTTCTTTAATTGGTTCCTCACTAGGTTGTTTAGCT  
 >Bacillus\_Fam\_1625\_36\_1 Nr. of seq. 1 Alignment length(with gaps) = 36  
 Alignment score = 0.000000  
 TTAGCGGCATTTCCGCCATTGGCTGCGTCGCCTCCG  
 >Bacillus\_Fam\_1626\_36\_1 Nr. of seq. 1 Alignment length(with gaps) = 36  
 Alignment score = 0.000000  
 ATCCGGGACATCCAGGGTATGGCGGCATGACTGGTT  
 >Bacillus\_Fam\_1627\_36\_1 Nr. of seq. 1 Alignment length(with gaps) = 36  
 Alignment score = 0.000000  
 GTTACTCCCGGTGATCCCGTTAAACCAGTTGCACCT  
 >Bacillus\_Fam\_1628\_36\_1 Nr. of seq. 1 Alignment length(with gaps) = 36  
 Alignment score = 0.000000  
 TTTCTGTTGATACTGGTGATACTTGACATATTTGGT  
 >Bacillus\_Fam\_1629\_36\_1 Nr. of seq. 1 Alignment length(with gaps) = 36  
 Alignment score = 0.000000  
 CAGGAGCACCGGGAGCAGCAGCTGGAACCTCCATATC  
 >Bacillus\_Fam\_1630\_36\_1 Nr. of seq. 1 Alignment length(with gaps) = 36  
 Alignment score = 0.000000  
 AGGAGAAACAGGGGCGACTGGTAGTCAAGGAGTTCA

>Bacillus\_Fam\_1631\_36\_1 Nr. of seq. 1 Alignment length(with gaps) = 36  
 Alignment score = 0.000000  
 GGCATCATTCCTCCGGCATGCCTCCTTGCCATTTGTCCC  
 >Bacillus\_Fam\_1632\_36\_1 Nr. of seq. 1 Alignment length(with gaps) = 36  
 Alignment score = 0.000000  
 CAGGTCCAAAAGGAAAAGAAGGCCACCCGGTCCAG  
 >Bacillus\_Fam\_1633\_36\_1 Nr. of seq. 1 Alignment length(with gaps) = 36  
 Alignment score = 0.000000  
 CTCCTGGTACTGGATTTAATCCTGGCATGGGTTATG  
 >Bacillus\_Fam\_1634\_34\_1 Nr. of seq. 1 Alignment length(with gaps) = 34  
 Alignment score = 0.000000  
 AACGTTTGATTGACTTCAGCGGTTCTACTAACTA  
 >Bacillus\_Fam\_1635\_34\_1 Nr. of seq. 1 Alignment length(with gaps) = 34  
 Alignment score = 0.000000  
 GGGGGTCAGGCACGCTTTAATGATTACCGCACT  
 >Bacillus\_Fam\_1636\_33\_1 Nr. of seq. 1 Alignment length(with gaps) = 33  
 Alignment score = 0.000000  
 GGAATGATGCCAATGCCAGGTCAAAACGGAAAT  
 >Bacillus\_Fam\_1637\_33\_1 Nr. of seq. 1 Alignment length(with gaps) = 33  
 Alignment score = 0.000000  
 GAACAAGAGCCTGAACTGACGCTAGCACAGAC  
 >Bacillus\_Fam\_1638\_33\_1 Nr. of seq. 1 Alignment length(with gaps) = 33  
 Alignment score = 0.000000  
 AACAAATCCGCCGTCAACAGGAGGAAATGAATC  
 >Bacillus\_Fam\_1639\_33\_1 Nr. of seq. 1 Alignment length(with gaps) = 33  
 Alignment score = 0.000000  
 GGCATGCCTCCACTTGTTGACCTCCCAATCCC  
 >Bacillus\_Fam\_1640\_33\_1 Nr. of seq. 1 Alignment length(with gaps) = 33  
 Alignment score = 0.000000  
 TAGAGCATAGATTAGAAGGCAAAATAGAAGAAC  
 >Bacillus\_Fam\_1641\_33\_1 Nr. of seq. 1 Alignment length(with gaps) = 33  
 Alignment score = 0.000000  
 ATTGTTGGAAGTCTAAGGATAAACATCATTCTG  
 >Bacillus\_Fam\_1642\_33\_1 Nr. of seq. 1 Alignment length(with gaps) = 33  
 Alignment score = 0.000000  
 CAACTAACAGAAACGAAAGATAACTTACAGTCA  
 >Bacillus\_Fam\_1643\_33\_1 Nr. of seq. 1 Alignment length(with gaps) = 33  
 Alignment score = 0.000000  
 ATCAGCATGACCTTCTTGCTTAGGAGCAGGGAA  
 >Bacillus\_Fam\_1644\_33\_1 Nr. of seq. 1 Alignment length(with gaps) = 33  
 Alignment score = 0.000000  
 AAAAGAAGAAAGCTTGTCGAGCGAGAAAAGCA  
 >Bacillus\_Fam\_1645\_33\_1 Nr. of seq. 1 Alignment length(with gaps) = 33  
 Alignment score = 0.000000  
 GGTGTTTGTGTTCTGGTGTGTTGTCCACTTCC  
 >Bacillus\_Fam\_1646\_33\_1 Nr. of seq. 1 Alignment length(with gaps) = 33  
 Alignment score = 0.000000  
 AGTGTTTTACTAACTTNTTCATCTAATTCAGTT  
 >Bacillus\_Fam\_1647\_33\_1 Nr. of seq. 1 Alignment length(with gaps) = 33  
 Alignment score = 0.000000  
 TAAGTTTGATGGAAAGCTTGAGGATTTAAGCAA  
 >Bacillus\_Fam\_1648\_33\_1 Nr. of seq. 1 Alignment length(with gaps) = 33  
 Alignment score = 0.000000  
 GTTAAACCTTGGTTCATTTCAATTTCTTACTTCC

>Bacillus\_Fam\_1649\_33\_1 Nr. of seq. 1 Alignment length(with gaps) = 33  
 Alignment score = 0.000000  
 CTGACGTACAAGCGGAAATGCAAGAGTTAAGAA  
 >Bacillus\_Fam\_1650\_33\_1 Nr. of seq. 1 Alignment length(with gaps) = 33  
 Alignment score = 0.000000  
 ATTTTCATCTTTTAAGTCCACTCTCACTACCGAG  
 >Bacillus\_Fam\_1651\_32\_1 Nr. of seq. 1 Alignment length(with gaps) = 32  
 Alignment score = 0.000000  
 CAGTTGTACAAGAACCCCTGTTTGCCAACTGT  
 >Bacillus\_Fam\_1652\_31\_1 Nr. of seq. 1 Alignment length(with gaps) = 31  
 Alignment score = 0.000000  
 TAGAATATATGAGAAAACGTTAATTCCGTTG  
 >Bacillus\_Fam\_1653\_30\_1 Nr. of seq. 1 Alignment length(with gaps) = 30  
 Alignment score = 0.000000  
 GGATCTTCCGGTTTCACTTCTGGTTCTTTC  
 >Bacillus\_Fam\_1654\_30\_1 Nr. of seq. 1 Alignment length(with gaps) = 30  
 Alignment score = 0.000000  
 CTTTCATCCTATCGTGAGGCCGATCTCGAGA  
 >Bacillus\_Fam\_1655\_30\_1 Nr. of seq. 1 Alignment length(with gaps) = 30  
 Alignment score = 0.000000  
 ATGCAAGGCGGAGGCTACCCGGGCTACGGT  
 >Bacillus\_Fam\_1656\_30\_1 Nr. of seq. 1 Alignment length(with gaps) = 30  
 Alignment score = 0.000000  
 ATATTTTCGGTTAGCTTTTCAACATAATGGG  
 >Bacillus\_Fam\_1657\_30\_1 Nr. of seq. 1 Alignment length(with gaps) = 30  
 Alignment score = 0.000000  
 TGCATGCCCTGCACATTGTTGGGTGGATAC  
 >Bacillus\_Fam\_1658\_30\_1 Nr. of seq. 1 Alignment length(with gaps) = 30  
 Alignment score = 0.000000  
 TAANCAAAGAGCCTATGAGTCCAACAGGAG  
 >Bacillus\_Fam\_1659\_30\_1 Nr. of seq. 1 Alignment length(with gaps) = 30  
 Alignment score = 0.000000  
 TTTTGTCCATCCGGCTTCTGCTCTTCTGGA  
 >Bacillus\_Fam\_1660\_30\_1 Nr. of seq. 1 Alignment length(with gaps) = 30  
 Alignment score = 0.000000  
 AAGAAAAAGCTGAAGACGACGCAGCAGCC  
 >Bacillus\_Fam\_1661\_30\_1 Nr. of seq. 1 Alignment length(with gaps) = 30  
 Alignment score = 0.000000  
 TTACCTGTTCCAGGGTCTGGGTTTCCTCCA  
 >Bacillus\_Fam\_1662\_30\_1 Nr. of seq. 1 Alignment length(with gaps) = 30  
 Alignment score = 0.000000  
 CCAGCCAAGCAGCAGCCTGCAGCTCCTGCA  
 >Bacillus\_Fam\_1663\_30\_1 Nr. of seq. 1 Alignment length(with gaps) = 30  
 Alignment score = 0.000000  
 TTTTCTTCAGCTATTTGCTTTGCCTTTGCC  
 >Bacillus\_Fam\_1664\_30\_1 Nr. of seq. 1 Alignment length(with gaps) = 30  
 Alignment score = 0.000000  
 GATGAGCTTTCTGTTGTACTACTTTCNTCT  
 >Bacillus\_Fam\_1665\_30\_1 Nr. of seq. 1 Alignment length(with gaps) = 30  
 Alignment score = 0.000000  
 GAGGAAGATCACGATCACGAACATGGACAT  
 >Bacillus\_Fam\_1666\_30\_1 Nr. of seq. 1 Alignment length(with gaps) = 30  
 Alignment score = 0.000000  
 TATGGCGGTCATTCTGGATATGGTATGGGC

```

>Bacillus_Fam_1667_30_1 Nr. of seq. 1 Alignment length(with gaps) = 30
Alignment score = 0.000000
CTTGTTTCGCTTTTTCCTTCACTAATGCTG
>Bacillus_Fam_1668_30_1 Nr. of seq. 1 Alignment length(with gaps) = 30
Alignment score = 0.000000
CACCATTGTCATGATGGACATAAACCTTGC
>Bacillus_Fam_1669_30_1 Nr. of seq. 1 Alignment length(with gaps) = 30
Alignment score = 0.000000
TCTTTGATCGGTGCNTGATACTTCGGCTGT
>Bacillus_Fam_1670_30_1 Nr. of seq. 1 Alignment length(with gaps) = 30
Alignment score = 0.000000
TACTACTTCTTCAGCTGCCGCTTCTTCAGT
>Bacillus_Fam_1671_30_1 Nr. of seq. 1 Alignment length(with gaps) = 30
Alignment score = 0.000000
CCAGGACCAGGCATGATGCCAGGAGGAATG
>Bacillus_Fam_1672_30_1 Nr. of seq. 1 Alignment length(with gaps) = 30
Alignment score = 0.000000
CCACCTTGTTGGTTGCTTTGGCTGCTGTGCT
>Bacillus_Fam_1673_29_1 Nr. of seq. 1 Alignment length(with gaps) = 29
Alignment score = 0.000000
TTGCGGTAATAAACTTCTAATACCCCTT
>Bacillus_Fam_1674_28_1 Nr. of seq. 1 Alignment length(with gaps) = 28
Alignment score = 0.000000
TTGGCATTAAACGGCATTGTGATTTTGCGN
>Bacillus_Fam_1675_28_1 Nr. of seq. 1 Alignment length(with gaps) = 28
Alignment score = 0.000000
CCAGTAACGCCAGTAACACCTGTNTAAG
>Bacillus_Fam_1676_27_1 Nr. of seq. 1 Alignment length(with gaps) = 27
Alignment score = 0.000000
GGACCAACAGGNGAGCAAGGGATCCAA
>Bacillus_Fam_1677_27_1 Nr. of seq. 1 Alignment length(with gaps) = 27
Alignment score = 0.000000
GGAGATGACGGCGAAACNCCAGGCACA
>Bacillus_Fam_1678_27_1 Nr. of seq. 1 Alignment length(with gaps) = 27
Alignment score = 0.000000
CCACCATATCCATGATGGTACGGGTAA
>Bacillus_Fam_1679_27_1 Nr. of seq. 1 Alignment length(with gaps) = 27
Alignment score = 0.000000
CCATACATGCCGGATCCTGGGAAACCC
>Bacillus_Fam_1680_27_1 Nr. of seq. 1 Alignment length(with gaps) = 27
Alignment score = 0.000000
TCTTCTTCTCCTCCCGGTGGCAACTCT
>Bacillus_Fam_1681_27_1 Nr. of seq. 1 Alignment length(with gaps) = 27
Alignment score = 0.000000
CCTGGTCCGAATGGAGATACGTTTGGC
>Bacillus_Fam_1682_27_1 Nr. of seq. 1 Alignment length(with gaps) = 27
Alignment score = 0.000000
CCCGGTTCTCCTGGCTCTCCCGGTTTA
>Bacillus_Fam_1683_27_1 Nr. of seq. 1 Alignment length(with gaps) = 27
Alignment score = 0.000000
CACAGGGGCCACAAGGGTTGACGGGNN
>Bacillus_Fam_1684_27_1 Nr. of seq. 1 Alignment length(with gaps) = 27
Alignment score = 0.000000
CCAGAGCCTCCTTCTCCGTCTCCAGTG

```

>Bacillus\_Fam\_1685\_27\_1 Nr. of seq. 1 Alignment length(with gaps) = 27  
 Alignment score = 0.000000  
 TTTCTGAAATTGCTNCCACTTCTTGAN  
 >Bacillus\_Fam\_1686\_27\_1 Nr. of seq. 1 Alignment length(with gaps) = 27  
 Alignment score = 0.000000  
 TGAAGCTGTTGAAGCTGTTGATGCTCT  
 >Bacillus\_Fam\_1687\_27\_1 Nr. of seq. 1 Alignment length(with gaps) = 27  
 Alignment score = 0.000000  
 GAGGTCCTTGAGGCCAGTTGCTCCCT  
 >Bacillus\_Fam\_1688\_27\_1 Nr. of seq. 1 Alignment length(with gaps) = 27  
 Alignment score = 0.000000  
 AGCAAAAACCGTTGCAGCCTATTCAAC  
 >Bacillus\_Fam\_1689\_27\_1 Nr. of seq. 1 Alignment length(with gaps) = 27  
 Alignment score = 0.000000  
 GGTCTACTGGTTCAACAGGAACATCA  
 >Bacillus\_Fam\_1690\_27\_1 Nr. of seq. 1 Alignment length(with gaps) = 27  
 Alignment score = 0.000000  
 AACTGCTTGATGAGCTCTCGCATGAGG  
 >Bacillus\_Fam\_1691\_27\_1 Nr. of seq. 1 Alignment length(with gaps) = 27  
 Alignment score = 0.000000  
 CCTTCTGGTCCCGCTGGTCTATTGCT  
 >Bacillus\_Fam\_1692\_27\_1 Nr. of seq. 1 Alignment length(with gaps) = 27  
 Alignment score = 0.000000  
 CCTGCATTTCTGTTCTTTCTGCTCTG  
 >Bacillus\_Fam\_1693\_27\_1 Nr. of seq. 1 Alignment length(with gaps) = 27  
 Alignment score = 0.000000  
 GCCAATTTTACTAGGTAAAATTCTACT  
 >Bacillus\_Fam\_1694\_27\_1 Nr. of seq. 1 Alignment length(with gaps) = 27  
 Alignment score = 0.000000  
 TCATGTCCATGCTCTTCATGCTCGTGA  
 >Bacillus\_Fam\_1695\_26\_1 Nr. of seq. 1 Alignment length(with gaps) = 26  
 Alignment score = 0.000000  
 TGTACCAGGTACAANACCNCAACTNN  
 >Bacillus\_Fam\_1696\_25\_1 Nr. of seq. 1 Alignment length(with gaps) = 25  
 Alignment score = 0.000000  
 TACTACCCTATGGTAAAATATGTAA  
 >Bacillus\_Fam\_1697\_25\_1 Nr. of seq. 1 Alignment length(with gaps) = 25  
 Alignment score = 0.000000  
 TGTACCTGGTACATGANCCNGTNNT  
 >Bacillus\_Fam\_1698\_24\_1 Nr. of seq. 1 Alignment length(with gaps) = 24  
 Alignment score = 0.000000  
 TGGAGTTGGAGGATTGGCGGACC  
 >Bacillus\_Fam\_1699\_24\_1 Nr. of seq. 1 Alignment length(with gaps) = 24  
 Alignment score = 0.000000  
 GGGACACAGCTGTTGGAGCTGTGC  
 >Bacillus\_Fam\_1700\_24\_1 Nr. of seq. 1 Alignment length(with gaps) = 24  
 Alignment score = 0.000000  
 CCTCCGCCAATACCAGGCACGGCG  
 >Bacillus\_Fam\_1701\_24\_1 Nr. of seq. 1 Alignment length(with gaps) = 24  
 Alignment score = 0.000000  
 GGAGGATTTTGCGCAGGCAGGTGC  
 >Bacillus\_Fam\_1702\_24\_1 Nr. of seq. 1 Alignment length(with gaps) = 24  
 Alignment score = 0.000000  
 ACTGTTTTTCGTTCTGCTATTTAC

>Bacillus\_Fam\_1703\_24\_1 Nr. of seq. 1 Alignment length(with gaps) = 24  
Alignment score = 0.000000  
GACCAAAACACAATACAGAAGTTG

>Bacillus\_Fam\_1704\_24\_1 Nr. of seq. 1 Alignment length(with gaps) = 24  
Alignment score = 0.000000  
CCGGGTGAAGGGCCAGGAGAAAAC

>Bacillus\_Fam\_1705\_24\_1 Nr. of seq. 1 Alignment length(with gaps) = 24  
Alignment score = 0.000000  
AGTGTCTTTTGTTCCTCTCAGAGTT

>Bacillus\_Fam\_1706\_24\_1 Nr. of seq. 1 Alignment length(with gaps) = 24  
Alignment score = 0.000000  
TCGGCACTTTCATCTNCACTTTCG

>Bacillus\_Fam\_1707\_24\_1 Nr. of seq. 1 Alignment length(with gaps) = 24  
Alignment score = 0.000000  
TCCTCCAGTGCTGCCTCCGTTGTC

>Bacillus\_Fam\_1708\_24\_1 Nr. of seq. 1 Alignment length(with gaps) = 24  
Alignment score = 0.000000  
TTACCTTGGCCACCACTTGGTCG

>Bacillus\_Fam\_1709\_24\_1 Nr. of seq. 1 Alignment length(with gaps) = 24  
Alignment score = 0.000000  
TTGTACTTGCTCCTGCACCGGCTC

>Bacillus\_Fam\_1710\_24\_1 Nr. of seq. 1 Alignment length(with gaps) = 24  
Alignment score = 0.000000  
CCATGATGATTGTGATGGTGTCCG

>Bacillus\_Fam\_1711\_24\_1 Nr. of seq. 1 Alignment length(with gaps) = 24  
Alignment score = 0.000000  
CCTGGTCCATAACCAGGGCCCAT

>Bacillus\_Fam\_1712\_24\_1 Nr. of seq. 1 Alignment length(with gaps) = 24  
Alignment score = 0.000000  
CGGTACTGGCGCCGGTGGCAACGG

>Bacillus\_Fam\_1713\_24\_1 Nr. of seq. 1 Alignment length(with gaps) = 24  
Alignment score = 0.000000  
TGATTCATATGCGCTTGTTGCGGC

>Bacillus\_Fam\_1714\_24\_1 Nr. of seq. 1 Alignment length(with gaps) = 24  
Alignment score = 0.000000  
GGTGGCGTTGTACCTCCATCTCCG

>Bacillus\_Fam\_1715\_24\_1 Nr. of seq. 1 Alignment length(with gaps) = 24  
Alignment score = 0.000000  
GTTTGTGCTGGCTTTTGAGTCTGA

>Bacillus\_Fam\_1716\_24\_1 Nr. of seq. 1 Alignment length(with gaps) = 24  
Alignment score = 0.000000  
GGCTAATAGANCGAAAGTGATAAC

>Bacillus\_Fam\_1717\_24\_1 Nr. of seq. 1 Alignment length(with gaps) = 24  
Alignment score = 0.000000  
TTCACGAGTAAATGACCCAATNAN

>Bacillus\_Fam\_1718\_24\_1 Nr. of seq. 1 Alignment length(with gaps) = 24  
Alignment score = 0.000000  
ATTCCGCCAACTATTGGAGTTNGG

>Bacillus\_Fam\_1719\_24\_1 Nr. of seq. 1 Alignment length(with gaps) = 24  
Alignment score = 0.000000  
ATATCAGCCAANGTAACGGGGAGC

>Bacillus\_Fam\_1720\_24\_1 Nr. of seq. 1 Alignment length(with gaps) = 24  
Alignment score = 0.000000  
TTTCAATTTCAATTCGTCTTCTTC

>Bacillus\_Fam\_1721\_24\_1 Nr. of seq. 1 Alignment length(with gaps) = 24  
 Alignment score = 0.000000  
 TTGCAGTACGCTAGAGTACTCCAG  
 >Bacillus\_Fam\_1722\_24\_1 Nr. of seq. 1 Alignment length(with gaps) = 24  
 Alignment score = 0.000000  
 GAAAAACAGCCTGCAACAGAAGAA  
 >Bacillus\_Fam\_1723\_24\_1 Nr. of seq. 1 Alignment length(with gaps) = 24  
 Alignment score = 0.000000  
 TGGTTCAATCNCCTCGNTCTTCAA  
 >Bacillus\_Fam\_1724\_24\_1 Nr. of seq. 1 Alignment length(with gaps) = 24  
 Alignment score = 0.000000  
 GTGCCGTCACCAAGTACCAGTACCC  
 >Bacillus\_Fam\_1725\_24\_1 Nr. of seq. 1 Alignment length(with gaps) = 24  
 Alignment score = 0.000000  
 GAAGAACCAACAACAGAACAACCT  
 >Bacillus\_Fam\_1726\_24\_1 Nr. of seq. 1 Alignment length(with gaps) = 24  
 Alignment score = 0.000000  
 AAACCAAGTGAAATAGACGAGACA  
 >Bacillus\_Fam\_1727\_24\_1 Nr. of seq. 1 Alignment length(with gaps) = 24  
 Alignment score = 0.000000  
 TTATTACCTGGTTTCTCGCCCGGT  
 >Bacillus\_Fam\_1728\_24\_1 Nr. of seq. 1 Alignment length(with gaps) = 24  
 Alignment score = 0.000000  
 CGACCATCAGGTCAAGGCCAACAA  
 >Bacillus\_Fam\_1729\_23\_1 Nr. of seq. 1 Alignment length(with gaps) = 23  
 Alignment score = 0.000000  
 GTGCACGCAAGAAGNCCGAAAAA  
 >Bacillus\_Fam\_1730\_23\_1 Nr. of seq. 1 Alignment length(with gaps) = 23  
 Alignment score = 0.000000  
 TTGGCCGGTAATTTNCATTNAAA  
 >Bacillus\_Fam\_1731\_23\_1 Nr. of seq. 1 Alignment length(with gaps) = 23  
 Alignment score = 0.000000  
 ATTCGGCCCTTANTCTCCATCNN  
 >Bacillus\_Fam\_1732\_23\_1 Nr. of seq. 1 Alignment length(with gaps) = 23  
 Alignment score = 0.000000  
 TACATGTAAATCATATTTTCGA  
 >Bacillus\_Fam\_1733\_23\_1 Nr. of seq. 1 Alignment length(with gaps) = 23  
 Alignment score = 0.000000  
 TACATCCAACAATTAGAGCAATT  
 >Bacillus\_Fam\_1734\_23\_1 Nr. of seq. 1 Alignment length(with gaps) = 23  
 Alignment score = 0.000000  
 GGTGATAAATAAATACCACTCTT  
 >Bacillus\_Fam\_1735\_23\_1 Nr. of seq. 1 Alignment length(with gaps) = 23  
 Alignment score = 0.000000  
 GTTGAACAGAANNATCAAGTTGA  
 >Bacillus\_Fam\_1736\_23\_1 Nr. of seq. 1 Alignment length(with gaps) = 23  
 Alignment score = 0.000000  
 AATCCAGCCGANAATACGAAANG  
 >Bacillus\_Fam\_1737\_23\_1 Nr. of seq. 1 Alignment length(with gaps) = 23  
 Alignment score = 0.000000  
 TTCGCCGATAACTNGCTNCATGN  
 >Bacillus\_Fam\_1738\_23\_1 Nr. of seq. 1 Alignment length(with gaps) = 23  
 Alignment score = 0.000000  
 TTTTCCGGCCGGTCGACTCGACT



>Bacillus\_Fam\_1739\_23\_1 Nr. of seq. 1 Alignment length(with gaps) = 23  
 Alignment score = 0.000000  
 AATCGCAAATAAAATCNAAGNNN  
 >Bacillus\_Fam\_1740\_23\_1 Nr. of seq. 1 Alignment length(with gaps) = 23  
 Alignment score = 0.000000  
 AAATCAACCAACTNATGAGTGAG  
 >Bacillus\_Fam\_1741\_22\_1 Nr. of seq. 1 Alignment length(with gaps) = 22  
 Alignment score = 0.000000  
 TATTTTCCGTTACNGNTATATT  
 >Bacillus\_Fam\_1742\_22\_1 Nr. of seq. 1 Alignment length(with gaps) = 22  
 Alignment score = 0.000000  
 TTTCTTGATATATCTTGCAANA  
 >Bacillus\_Fam\_1743\_22\_1 Nr. of seq. 1 Alignment length(with gaps) = 22  
 Alignment score = 0.000000  
 TTTATCGGCCGCTTTTGATAAT  
 >Bacillus\_Fam\_1744\_22\_1 Nr. of seq. 1 Alignment length(with gaps) = 22  
 Alignment score = 0.000000  
 TTTATTTGCGAACTAGCCACA  
 >Bacillus\_Fam\_1745\_22\_1 Nr. of seq. 1 Alignment length(with gaps) = 22  
 Alignment score = 0.000000  
 ATTGCGGGCGTTCTANGCCATA  
 >Bacillus\_Fam\_1746\_22\_1 Nr. of seq. 1 Alignment length(with gaps) = 22  
 Alignment score = 0.000000  
 GATACCTTATGAGTACGGAAAT  
 >Bacillus\_Fam\_1747\_22\_1 Nr. of seq. 1 Alignment length(with gaps) = 22  
 Alignment score = 0.000000  
 GAGGAGAAGAAANAGCGGAGCN  
 >Bacillus\_Fam\_1748\_22\_1 Nr. of seq. 1 Alignment length(with gaps) = 22  
 Alignment score = 0.000000  
 TATAATGAATTCTCAACNATA  
 >Bacillus\_Fam\_1749\_22\_1 Nr. of seq. 1 Alignment length(with gaps) = 22  
 Alignment score = 0.000000  
 TAATCCTGATTTCGCTGCATT  
 >Bacillus\_Fam\_1750\_22\_1 Nr. of seq. 1 Alignment length(with gaps) = 22  
 Alignment score = 0.000000  
 CAATAATTGATGCAATCAACTT  
 >Bacillus\_Fam\_1751\_22\_1 Nr. of seq. 1 Alignment length(with gaps) = 22  
 Alignment score = 0.000000  
 TTTACTTAACAGAGCTTCGGAA  
 >Bacillus\_Fam\_1752\_22\_1 Nr. of seq. 1 Alignment length(with gaps) = 22  
 Alignment score = 0.000000  
 TGGTGCAACACCACGCAAAAN  
 >Bacillus\_Fam\_1753\_22\_1 Nr. of seq. 1 Alignment length(with gaps) = 22  
 Alignment score = 0.000000  
 TCTATTGGCGAATTTACCTAN  
 >Bacillus\_Fam\_1754\_22\_1 Nr. of seq. 1 Alignment length(with gaps) = 22  
 Alignment score = 0.000000  
 TTTGATAGGAAAGCTGNTTANN  
 >Bacillus\_Fam\_1755\_22\_1 Nr. of seq. 1 Alignment length(with gaps) = 22  
 Alignment score = 0.000000  
 TTTACCCGATTANACGCATANT  
 >Bacillus\_Fam\_1756\_22\_1 Nr. of seq. 1 Alignment length(with gaps) = 22  
 Alignment score = 0.000000  
 TTTAATTGCAGATATAGCATAN

>Bacillus\_Fam\_1757\_22\_1 Nr. of seq. 1 Alignment length(with gaps) = 22  
 Alignment score = 0.000000  
 ATTCGTCCGAAATCCGCCTTCN  
 >Bacillus\_Fam\_1758\_22\_1 Nr. of seq. 1 Alignment length(with gaps) = 22  
 Alignment score = 0.000000  
 TCGCGGGATTNCCATGCTCTTT  
 >Bacillus\_Fam\_1759\_21\_1 Nr. of seq. 1 Alignment length(with gaps) = 21  
 Alignment score = 0.000000  
 TCAAACCTTTTATCAACAGCA  
 >Bacillus\_Fam\_1760\_21\_1 Nr. of seq. 1 Alignment length(with gaps) = 21  
 Alignment score = 0.000000  
 GGTGGCACAACAAACCCAGGC  
 >Bacillus\_Fam\_1761\_21\_1 Nr. of seq. 1 Alignment length(with gaps) = 21  
 Alignment score = 0.000000  
 CCGCACGAGAAGAAGGTCCNC  
 >Bacillus\_Fam\_1762\_21\_1 Nr. of seq. 1 Alignment length(with gaps) = 21  
 Alignment score = 0.000000  
 GCCGGGCACACCGCCGCCGAA  
 >Bacillus\_Fam\_1763\_21\_1 Nr. of seq. 1 Alignment length(with gaps) = 21  
 Alignment score = 0.000000  
 TCTTTTGGCTCACAATCC  
 >Bacillus\_Fam\_1764\_21\_1 Nr. of seq. 1 Alignment length(with gaps) = 21  
 Alignment score = 0.000000  
 TTACCCATATATCTGNGCACT  
 >Bacillus\_Fam\_1765\_21\_1 Nr. of seq. 1 Alignment length(with gaps) = 21  
 Alignment score = 0.000000  
 TTCCTTCCGTGGTAACGTGGA  
 >Bacillus\_Fam\_1766\_21\_1 Nr. of seq. 1 Alignment length(with gaps) = 21  
 Alignment score = 0.000000  
 AATCGAGTGCTTTTCTCGCGG  
 >Bacillus\_Fam\_1767\_21\_1 Nr. of seq. 1 Alignment length(with gaps) = 21  
 Alignment score = 0.000000  
 TTTACCCATATGAATTAGCTA  
 >Bacillus\_Fam\_1768\_21\_1 Nr. of seq. 1 Alignment length(with gaps) = 21  
 Alignment score = 0.000000  
 TACCACATAAAATGCGGATT  
 >Bacillus\_Fam\_1769\_21\_1 Nr. of seq. 1 Alignment length(with gaps) = 21  
 Alignment score = 0.000000  
 CATGAAGAAGAAGAACATGGA  
 >Bacillus\_Fam\_1770\_21\_1 Nr. of seq. 1 Alignment length(with gaps) = 21  
 Alignment score = 0.000000  
 TTGGCTGATATCGGTGTTGGA  
 >Bacillus\_Fam\_1771\_21\_1 Nr. of seq. 1 Alignment length(with gaps) = 21  
 Alignment score = 0.000000  
 TATAATGAATCTCGAANCATT  
 >Bacillus\_Fam\_1772\_21\_1 Nr. of seq. 1 Alignment length(with gaps) = 21  
 Alignment score = 0.000000  
 AAAGTGATTGATAANNGGATN  
 >Bacillus\_Fam\_1773\_21\_1 Nr. of seq. 1 Alignment length(with gaps) = 21  
 Alignment score = 0.000000  
 TTAAACAGGTTAGGCTCTCAT  
 >Bacillus\_Fam\_1774\_21\_1 Nr. of seq. 1 Alignment length(with gaps) = 21  
 Alignment score = 0.000000  
 TAATTCTACCTAAAAAGNCAT

>Bacillus\_Fam\_1775\_21\_1 Nr. of seq. 1 Alignment length(with gaps) = 21  
 Alignment score = 0.000000  
 GAGCAAAAAAGNACCNTGCNG  
 >Bacillus\_Fam\_1776\_21\_1 Nr. of seq. 1 Alignment length(with gaps) = 21  
 Alignment score = 0.000000  
 TTTTGTGCTCANCACACCNATN  
 >Bacillus\_Fam\_1777\_21\_1 Nr. of seq. 1 Alignment length(with gaps) = 21  
 Alignment score = 0.000000  
 TGCCACAAGGAATGCATCAAG  
 >Bacillus\_Fam\_1778\_21\_1 Nr. of seq. 1 Alignment length(with gaps) = 21  
 Alignment score = 0.000000  
 ACTGACGCAATAGCGTCTGGA  
 >Bacillus\_Fam\_1779\_21\_1 Nr. of seq. 1 Alignment length(with gaps) = 21  
 Alignment score = 0.000000  
 TTGGATCTTTCGGATCTGTGC  
 >Bacillus\_Fam\_1780\_21\_1 Nr. of seq. 1 Alignment length(with gaps) = 21  
 Alignment score = 0.000000  
 CTTCTTGGGACCGTCATCCGG  
 >Bacillus\_Fam\_1781\_21\_1 Nr. of seq. 1 Alignment length(with gaps) = 21  
 Alignment score = 0.000000  
 AAGTGACCGGTATTTNNACNA  
 >Bacillus\_Fam\_1782\_21\_1 Nr. of seq. 1 Alignment length(with gaps) = 21  
 Alignment score = 0.000000  
 GAACTGCGACGGTTGCGAGAA  
 >Bacillus\_Fam\_1783\_21\_1 Nr. of seq. 1 Alignment length(with gaps) = 21  
 Alignment score = 0.000000  
 GGATCATTTTCCAATATCNTT  
 >Bacillus\_Fam\_1784\_21\_1 Nr. of seq. 1 Alignment length(with gaps) = 21  
 Alignment score = 0.000000  
 AATTTGTAGATATCTAGACCA  
 >Bacillus\_Fam\_1785\_21\_1 Nr. of seq. 1 Alignment length(with gaps) = 21  
 Alignment score = 0.000000  
 CAGCCAGCACCGCAGCAGGCA  
 >Bacillus\_Fam\_1786\_21\_1 Nr. of seq. 1 Alignment length(with gaps) = 21  
 Alignment score = 0.000000  
 CCTGGGAAAAACGGACCCACA  
 >Bacillus\_Fam\_1787\_21\_1 Nr. of seq. 1 Alignment length(with gaps) = 21  
 Alignment score = 0.000000  
 TTTGGATTGTTACACGCCGCA  
 >Bacillus\_Fam\_1788\_21\_1 Nr. of seq. 1 Alignment length(with gaps) = 21  
 Alignment score = 0.000000  
 AACGGGAGTAAANTCCTCCTG  
 >Bacillus\_Fam\_1789\_21\_1 Nr. of seq. 1 Alignment length(with gaps) = 21  
 Alignment score = 0.000000  
 ATTCAACAGTAGATTACGAGT  
 >Bacillus\_Fam\_1790\_21\_1 Nr. of seq. 1 Alignment length(with gaps) = 21  
 Alignment score = 0.000000  
 ATGGACAAGCTTGAATCCCGA  
 >Bacillus\_Fam\_1791\_21\_1 Nr. of seq. 1 Alignment length(with gaps) = 21  
 Alignment score = 0.000000  
 TACGAGAGTAAACCTGNGTTA  
 >Bacillus\_Fam\_1792\_21\_1 Nr. of seq. 1 Alignment length(with gaps) = 21  
 Alignment score = 0.000000  
 TCTACAAATTCAGGNCCGTAT

>Bacillus\_Fam\_1793\_21\_1 Nr. of seq. 1 Alignment length(with gaps) = 21  
 Alignment score = 0.000000  
 TGTTTCTACAAATTAAAGATG

>Bacillus\_Fam\_1794\_21\_1 Nr. of seq. 1 Alignment length(with gaps) = 21  
 Alignment score = 0.000000  
 TTTTGTAGANTNAGCACTTAA

>Bacillus\_Fam\_1795\_21\_1 Nr. of seq. 1 Alignment length(with gaps) = 21  
 Alignment score = 0.000000  
 TACTGTTGAAGTTTCATCTTT

>Bacillus\_Fam\_1796\_21\_1 Nr. of seq. 1 Alignment length(with gaps) = 21  
 Alignment score = 0.000000  
 AACTTCGGAAATNATAGCNTC

>Bacillus\_Fam\_1797\_21\_1 Nr. of seq. 1 Alignment length(with gaps) = 21  
 Alignment score = 0.000000  
 AGTCCAAAACCNCAATGGAAAT

>Bacillus\_Fam\_1798\_21\_1 Nr. of seq. 1 Alignment length(with gaps) = 21  
 Alignment score = 0.000000  
 CTGTTCTACAGCTTCGACAAG

>Bacillus\_Fam\_1799\_21\_1 Nr. of seq. 1 Alignment length(with gaps) = 21  
 Alignment score = 0.000000  
 AAGGAACAGCCGAAACAAGTA

>Bacillus\_Fam\_1800\_21\_1 Nr. of seq. 1 Alignment length(with gaps) = 21  
 Alignment score = 0.000000  
 AGAGATTTATCTCCAGTTAAG

>Bacillus\_Fam\_1801\_21\_1 Nr. of seq. 1 Alignment length(with gaps) = 21  
 Alignment score = 0.000000  
 ATTCCGCGAAAAAATTCTTTA

>Bacillus\_Fam\_1802\_21\_1 Nr. of seq. 1 Alignment length(with gaps) = 21  
 Alignment score = 0.000000  
 TTTTCTACGGTTGGCAGCAN

>Bacillus\_Fam\_1803\_21\_1 Nr. of seq. 1 Alignment length(with gaps) = 21  
 Alignment score = 0.000000  
 AAAACCAGAAGGCGAAGGTGG

>Bacillus\_Fam\_1804\_21\_1 Nr. of seq. 1 Alignment length(with gaps) = 21  
 Alignment score = 0.000000  
 AGACTAAGCTGATACTTAATG

>Bacillus\_Fam\_1805\_21\_1 Nr. of seq. 1 Alignment length(with gaps) = 21  
 Alignment score = 0.000000  
 GGTTGGATCGGGTTGAAGAGC

>Bacillus\_Fam\_1806\_21\_1 Nr. of seq. 1 Alignment length(with gaps) = 21  
 Alignment score = 0.000000  
 TTGGAAAATAAACTTNCNTN

>Bacillus\_Fam\_1807\_21\_1 Nr. of seq. 1 Alignment length(with gaps) = 21  
 Alignment score = 0.000000  
 GACGAATTATCTTCTCTCAAG

>Bacillus\_Fam\_1808\_21\_1 Nr. of seq. 1 Alignment length(with gaps) = 21  
 Alignment score = 0.000000  
 GGCACATAAACTACGTCGAGT

>Bacillus\_Fam\_1809\_21\_1 Nr. of seq. 1 Alignment length(with gaps) = 21  
 Alignment score = 0.000000  
 TTATGCGCGATCTTCCCTCGG

>Bacillus\_Fam\_1810\_21\_1 Nr. of seq. 1 Alignment length(with gaps) = 21  
 Alignment score = 0.000000  
 AACAAGCACAGCANGCAATTC

>Bacillus\_Fam\_1811\_21\_1 Nr. of seq. 1 Alignment length(with gaps) = 21  
Alignment score = 0.000000  
TTTGCGAATAAACCATNNATT

>Bacillus\_Fam\_1812\_21\_1 Nr. of seq. 1 Alignment length(with gaps) = 21  
Alignment score = 0.000000  
TGCTAGATAAATAGCTACAAT

>Bacillus\_Fam\_1813\_21\_1 Nr. of seq. 1 Alignment length(with gaps) = 21  
Alignment score = 0.000000  
GCGGGATTATAGTAAAAATTC

>Bacillus\_Fam\_1814\_21\_1 Nr. of seq. 1 Alignment length(with gaps) = 21  
Alignment score = 0.000000  
TAATAGACAAAATACTTNGGN

>Bacillus\_Fam\_1815\_21\_1 Nr. of seq. 1 Alignment length(with gaps) = 21  
Alignment score = 0.000000  
CGACGCAAATAATCCAGTAAT

>Bacillus\_Fam\_1816\_21\_1 Nr. of seq. 1 Alignment length(with gaps) = 21  
Alignment score = 0.000000  
TAGGGCACAAATTANTTCCANN

>Bacillus\_Fam\_1817\_21\_1 Nr. of seq. 1 Alignment length(with gaps) = 21  
Alignment score = 0.000000  
ACCTCCTAGTCCAACAGGAAA

>Bacillus\_Fam\_1818\_21\_1 Nr. of seq. 1 Alignment length(with gaps) = 21  
Alignment score = 0.000000  
GCGAGAATCCAGACAAGAGGA

>Bacillus\_Fam\_1819\_21\_1 Nr. of seq. 1 Alignment length(with gaps) = 21  
Alignment score = 0.000000  
GTCCTCCAATGCTTCAACTCT

>Bacillus\_Fam\_1820\_21\_1 Nr. of seq. 1 Alignment length(with gaps) = 21  
Alignment score = 0.000000  
GGAAGCGGAGACGGAGATAGC

>Bacillus\_Fam\_1821\_21\_1 Nr. of seq. 1 Alignment length(with gaps) = 21  
Alignment score = 0.000000  
GTTGCACCAAGTTTGTACGGT

>Bacillus\_Fam\_1822\_21\_1 Nr. of seq. 1 Alignment length(with gaps) = 21  
Alignment score = 0.000000  
TGGCACAAAAGGATGTTGGGT

>Bacillus\_Fam\_1823\_21\_1 Nr. of seq. 1 Alignment length(with gaps) = 21  
Alignment score = 0.000000  
TTGACGCACTTGNAAAATTAA

>Bacillus\_Fam\_1824\_21\_1 Nr. of seq. 1 Alignment length(with gaps) = 21  
Alignment score = 0.000000  
TTTATGTGTGCCNGTGAANCN

>Bacillus\_Fam\_1825\_21\_1 Nr. of seq. 1 Alignment length(with gaps) = 21  
Alignment score = 0.000000  
CCGAAACCTGGGCCTCCTGGG

>Bacillus\_Fam\_1826\_21\_1 Nr. of seq. 1 Alignment length(with gaps) = 21  
Alignment score = 0.000000  
TGCAAATAGAANGCANGAATN

>Bacillus\_Fam\_1827\_21\_1 Nr. of seq. 1 Alignment length(with gaps) = 21  
Alignment score = 0.000000  
TTTGGCCGGTAAATTATGCAN

>Bacillus\_Fam\_1828\_21\_1 Nr. of seq. 1 Alignment length(with gaps) = 21  
Alignment score = 0.000000  
GAAGCTCTTCGGACTGCGTTT

```

>Bacillus_Fam_1829_21_1 Nr. of seq. 1 Alignment length(with gaps) = 21
Alignment score = 0.000000
TATCAGCCAAACTCGAGGGCT
>Bacillus_Fam_1830_21_1 Nr. of seq. 1 Alignment length(with gaps) = 21
Alignment score = 0.000000
AAATAGGTAGTAAGTGACCAT
>Bacillus_Fam_1831_21_1 Nr. of seq. 1 Alignment length(with gaps) = 21
Alignment score = 0.000000
TTTTGTTGAATGGCACCTGGT
>Bacillus_Fam_1832_21_1 Nr. of seq. 1 Alignment length(with gaps) = 21
Alignment score = 0.000000
CGCCTTGACGGACTAGACCAA
>Bacillus_Fam_1833_21_1 Nr. of seq. 1 Alignment length(with gaps) = 21
Alignment score = 0.000000
TTAGCGATTTNANACNGCCTA
>Bacillus_Fam_1834_21_1 Nr. of seq. 1 Alignment length(with gaps) = 21
Alignment score = 0.000000
GACGGGTAAAATCNAANAANTT
>Bacillus_Fam_1835_21_1 Nr. of seq. 1 Alignment length(with gaps) = 21
Alignment score = 0.000000
GGCGAATAAAACAGTGAGCAT
>Bacillus_Fam_1836_21_1 Nr. of seq. 1 Alignment length(with gaps) = 21
Alignment score = 0.000000
TTCTTATCAAAANAAGCGGAC
>Bacillus_Fam_1837_21_1 Nr. of seq. 1 Alignment length(with gaps) = 21
Alignment score = 0.000000
AATGATCGAAAANATCTCNAN
>Bacillus_Fam_1838_21_1 Nr. of seq. 1 Alignment length(with gaps) = 21
Alignment score = 0.000000
AAATGTTGCACAAAAACGAAA
>Bacillus_Fam_1839_21_1 Nr. of seq. 1 Alignment length(with gaps) = 21
Alignment score = 0.000000
GGACGAATTATCTCCTGATTG
>Bacillus_Fam_1840_21_1 Nr. of seq. 1 Alignment length(with gaps) = 21
Alignment score = 0.000000
ATTGCGCGACTTTCATNTGGN
>Bacillus_Fam_1841_21_1 Nr. of seq. 1 Alignment length(with gaps) = 21
Alignment score = 0.000000
AGTCGCGCAATGCAGGTATAA
>Bacillus_Fam_1842_21_1 Nr. of seq. 1 Alignment length(with gaps) = 21
Alignment score = 0.000000
TGACGGGATTNCCNNTTCTTA
>Bacillus_Fam_1843_21_1 Nr. of seq. 1 Alignment length(with gaps) = 21
Alignment score = 0.000000
TGAAGGGATTTTNCACACTTG
>Bacillus_Fam_1844_21_1 Nr. of seq. 1 Alignment length(with gaps) = 21
Alignment score = 0.000000
GCACGAACTCCGAGCGTTTCC
>Bacillus_Fam_1845_21_1 Nr. of seq. 1 Alignment length(with gaps) = 21
Alignment score = 0.000000
TGCAAATAAAANTNNTCAAGN
>Bacillus_Fam_1846_21_1 Nr. of seq. 1 Alignment length(with gaps) = 21
Alignment score = 0.000000
TTATTTGCAGNNTTNAATNTN

```

>Bacillus\_Fam\_1847\_21\_1 Nr. of seq. 1 Alignment length(with gaps) = 21  
 Alignment score = 0.000000  
 TTTATTTTCGNTTTTCCTNGT  
 >Bacillus\_Fam\_1848\_21\_1 Nr. of seq. 1 Alignment length(with gaps) = 21  
 Alignment score = 0.000000  
 TTTATTTTCGNTTTCTACGCA  
 >Bacillus\_Fam\_1849\_21\_1 Nr. of seq. 1 Alignment length(with gaps) = 21  
 Alignment score = 0.000000  
 TCGTGCGAATCATNTCGGAAT  
 >Bacillus\_Fam\_1850\_21\_1 Nr. of seq. 1 Alignment length(with gaps) = 21  
 Alignment score = 0.000000  
 AATCCGCGCGATNTGAAGCAG  
 >Bacillus\_Fam\_1851\_21\_1 Nr. of seq. 1 Alignment length(with gaps) = 21  
 Alignment score = 0.000000  
 ATTCGTCCAAAATCCNGTAAC  
 >Bacillus\_Fam\_1852\_21\_1 Nr. of seq. 1 Alignment length(with gaps) = 21  
 Alignment score = 0.000000  
 TTGGACGAATNAGNGCGNGAA  
 >Bacillus\_Fam\_1853\_21\_1 Nr. of seq. 1 Alignment length(with gaps) = 21  
 Alignment score = 0.000000  
 TATTATCGAAATCNANAAATT  
 >Bacillus\_Fam\_1854\_21\_1 Nr. of seq. 1 Alignment length(with gaps) = 21  
 Alignment score = 0.000000  
 GGCGCAATTAATTAGANAGTN  
 >Bacillus\_Fam\_1855\_21\_1 Nr. of seq. 1 Alignment length(with gaps) = 21  
 Alignment score = 0.000000  
 TTAGATGTTAGTATAGCGTGT  
 >Bacillus\_Fam\_1856\_21\_1 Nr. of seq. 1 Alignment length(with gaps) = 21  
 Alignment score = 0.000000  
 TCGTCTTCTTCATGCGCGTGA  
 >Bacillus\_Fam\_1857\_21\_1 Nr. of seq. 1 Alignment length(with gaps) = 21  
 Alignment score = 0.000000  
 CGGCTTGGAACAAAGTCGA  
 >Bacillus\_Fam\_1858\_21\_1 Nr. of seq. 1 Alignment length(with gaps) = 21  
 Alignment score = 0.000000  
 TTATGGGACACTGGTTTCATN  
 >Bacillus\_Fam\_1859\_21\_1 Nr. of seq. 1 Alignment length(with gaps) = 21  
 Alignment score = 0.000000  
 TTCATTTCTTGTAGATCCCGC  
 >Bacillus\_Fam\_1860\_20\_1 Nr. of seq. 1 Alignment length(with gaps) = 20  
 Alignment score = 0.000000  
 TTTCTTGATATANTGTNAAT  
 >Bacillus\_Fam\_1861\_20\_1 Nr. of seq. 1 Alignment length(with gaps) = 20  
 Alignment score = 0.000000  
 TTTGCGTCAACANCCACAGA  
 >Bacillus\_Fam\_1862\_20\_1 Nr. of seq. 1 Alignment length(with gaps) = 20  
 Alignment score = 0.000000  
 ATTTGCGTCNNTTCCNNCNG  
 >Bacillus\_Fam\_1863\_20\_1 Nr. of seq. 1 Alignment length(with gaps) = 20  
 Alignment score = 0.000000  
 TAATGAGGGTATTAAACTTT  
 >Bacillus\_Fam\_1864\_20\_1 Nr. of seq. 1 Alignment length(with gaps) = 20  
 Alignment score = 0.000000  
 TTATCCATCACTTCGGCCGG

```

>Bacillus_Fam_1865_20_1  Nr. of seq. 1 Alignment length(with gaps) = 20
Alignment score = 0.000000
TTTACCGGCACTTTCACNAT
>Bacillus_Fam_1866_20_1  Nr. of seq. 1 Alignment length(with gaps) = 20
Alignment score = 0.000000
TTACTTGCGGTTGGGGNGCG
>Bacillus_Fam_1867_20_1  Nr. of seq. 1 Alignment length(with gaps) = 20
Alignment score = 0.000000
TTTCCGAAGTTGGCGTGTTT
>Bacillus_Fam_1868_20_1  Nr. of seq. 1 Alignment length(with gaps) = 20
Alignment score = 0.000000
TTTACGTGCCAAATTATAGA
>Bacillus_Fam_1869_20_1  Nr. of seq. 1 Alignment length(with gaps) = 20
Alignment score = 0.000000
TAATTGCAAAAATCCTTGAA
>Bacillus_Fam_1870_20_1  Nr. of seq. 1 Alignment length(with gaps) = 20
Alignment score = 0.000000
TACATTAAAGTTCACTACTT
>Bacillus_Fam_1871_20_1  Nr. of seq. 1 Alignment length(with gaps) = 20
Alignment score = 0.000000
GGCGCAAAAATCGAATGAGA
>Bacillus_Fam_1872_20_1  Nr. of seq. 1 Alignment length(with gaps) = 20
Alignment score = 0.000000
GCGAATATATTCNTATNACG
>Bacillus_Fam_1873_20_1  Nr. of seq. 1 Alignment length(with gaps) = 20
Alignment score = 0.000000
CGAATAAAATCAGAGTAAGGT
>Bacillus_Fam_1874_20_1  Nr. of seq. 1 Alignment length(with gaps) = 20
Alignment score = 0.000000
TTATCCTGAAATCTATGGGT
>Bacillus_Fam_1875_20_1  Nr. of seq. 1 Alignment length(with gaps) = 20
Alignment score = 0.000000
TGACGGGATTTTAGTNGTTA
>Bacillus_Fam_1876_20_1  Nr. of seq. 1 Alignment length(with gaps) = 20
Alignment score = 0.000000
ATTGTGACTTTTCCATNGTT
>Bacillus_Fam_1877_20_1  Nr. of seq. 1 Alignment length(with gaps) = 20
Alignment score = 0.000000
CGAGTTTTTTTAGGTCAGGAG
>Bacillus_Fam_1878_20_1  Nr. of seq. 1 Alignment length(with gaps) = 20
Alignment score = 0.000000
TTTATGAGCCANTACCTCTN
>Bacillus_Fam_1879_20_1  Nr. of seq. 1 Alignment length(with gaps) = 20
Alignment score = 0.000000
CCTGAGCTCCTCTCTCTAAT
>Bacillus_Fam_1880_20_1  Nr. of seq. 1 Alignment length(with gaps) = 20
Alignment score = 0.000000
AGTAAAAATAGCGGGCGCGAC
>Bacillus_Fam_1881_20_1  Nr. of seq. 1 Alignment length(with gaps) = 20
Alignment score = 0.000000
TTTATCCGTAAGAATTTTCA
>Bacillus_Fam_1882_19_1  Nr. of seq. 1 Alignment length(with gaps) = 19
Alignment score = 0.000000
TATATTCTCTACGTTATTA

```



```

>Bacillus_Fam_1883_19_1 Nr. of seq. 1 Alignment length(with gaps) = 19
Alignment score = 0.000000
CTTGATTGAGAATCCTCAG
>Bacillus_Fam_1884_19_1 Nr. of seq. 1 Alignment length(with gaps) = 19
Alignment score = 0.000000
TCATCCTCAGAATGAGTGC
>Bacillus_Fam_1885_18_1 Nr. of seq. 1 Alignment length(with gaps) = 18
Alignment score = 0.000000
GGCAATGGAAACGGGAAT
>Bacillus_Fam_1886_18_1 Nr. of seq. 1 Alignment length(with gaps) = 18
Alignment score = 0.000000
CGTCTGTTGTTTGTCTC
>Bacillus_Fam_1887_18_1 Nr. of seq. 1 Alignment length(with gaps) = 18
Alignment score = 0.000000
TCAAAACCGTAGTTAAGG
>Bacillus_Fam_1888_18_1 Nr. of seq. 1 Alignment length(with gaps) = 18
Alignment score = 0.000000
CCTGGTATGGGCGGATCA
>Bacillus_Fam_1889_18_1 Nr. of seq. 1 Alignment length(with gaps) = 18
Alignment score = 0.000000
TGTGTTTACGGCATGTTG
>Bacillus_Fam_1890_18_1 Nr. of seq. 1 Alignment length(with gaps) = 18
Alignment score = 0.000000
TGACCGTGATGGACGTGA
>Bacillus_Fam_1891_18_1 Nr. of seq. 1 Alignment length(with gaps) = 18
Alignment score = 0.000000
GTTGTCGTCGGTGCGGCN
>Bacillus_Fam_1892_18_1 Nr. of seq. 1 Alignment length(with gaps) = 18
Alignment score = 0.000000
GTTAACTGAGGAAGAAGG
>Bacillus_Fam_1893_18_1 Nr. of seq. 1 Alignment length(with gaps) = 18
Alignment score = 0.000000
AAAGAACAACCAATCATC
>Bacillus_Fam_1894_18_1 Nr. of seq. 1 Alignment length(with gaps) = 18
Alignment score = 0.000000
GATGCCTGGTGGTGGAAT
>Bacillus_Fam_1895_18_1 Nr. of seq. 1 Alignment length(with gaps) = 18
Alignment score = 0.000000
TAATTAGTTACCAAGCAA
>Bacillus_Fam_1896_18_1 Nr. of seq. 1 Alignment length(with gaps) = 18
Alignment score = 0.000000
TGCTGCTGAAGAGCAGGC
>Bacillus_Fam_1897_18_1 Nr. of seq. 1 Alignment length(with gaps) = 18
Alignment score = 0.000000
GGAAAGAGAACGCGAGCG
>Bacillus_Fam_1898_18_1 Nr. of seq. 1 Alignment length(with gaps) = 18
Alignment score = 0.000000
CATCTAAACCAACTACAG
>Bacillus_Fam_1899_18_1 Nr. of seq. 1 Alignment length(with gaps) = 18
Alignment score = 0.000000
AGAGCGTTTAGACTGCTT
>Bacillus_Fam_1900_18_1 Nr. of seq. 1 Alignment length(with gaps) = 18
Alignment score = 0.000000
TATTATGAATAAAGAATC

```

>Bacillus\_Fam\_1901\_18\_1 Nr. of seq. 1 Alignment length(with gaps) = 18  
Alignment score = 0.000000  
AGCTCTTGAAGACGACAC

>Bacillus\_Fam\_1902\_18\_1 Nr. of seq. 1 Alignment length(with gaps) = 18  
Alignment score = 0.000000  
CACGGACATCACCATGGC

>Bacillus\_Fam\_1903\_18\_1 Nr. of seq. 1 Alignment length(with gaps) = 18  
Alignment score = 0.000000  
CCTAAGGACCCTATAGAC

>Bacillus\_Fam\_1904\_18\_1 Nr. of seq. 1 Alignment length(with gaps) = 18  
Alignment score = 0.000000  
CCAGGACAGCCAGGCANC

>Bacillus\_Fam\_1905\_18\_1 Nr. of seq. 1 Alignment length(with gaps) = 18  
Alignment score = 0.000000  
TCACCTGGTTCTTCGTTA

>Bacillus\_Fam\_1906\_18\_1 Nr. of seq. 1 Alignment length(with gaps) = 18  
Alignment score = 0.000000  
AGCAGAGGGTCAAAAGGC

>Bacillus\_Fam\_1907\_18\_1 Nr. of seq. 1 Alignment length(with gaps) = 18  
Alignment score = 0.000000  
CACTAGCCGTCGTCGCTT

>Bacillus\_Fam\_1908\_18\_1 Nr. of seq. 1 Alignment length(with gaps) = 18  
Alignment score = 0.000000  
TCTTGTTTGTCTGTTTA

>Bacillus\_Fam\_1909\_18\_1 Nr. of seq. 1 Alignment length(with gaps) = 18  
Alignment score = 0.000000  
AGCCAGGCCCGGATCCGC

>Bacillus\_Fam\_1910\_18\_1 Nr. of seq. 1 Alignment length(with gaps) = 18  
Alignment score = 0.000000  
AAGCTCTTGGTCTACATC

>Bacillus\_Fam\_1911\_18\_1 Nr. of seq. 1 Alignment length(with gaps) = 18  
Alignment score = 0.000000  
TGGCGTTTGATTATTACC

>Bacillus\_Fam\_1912\_18\_1 Nr. of seq. 1 Alignment length(with gaps) = 18  
Alignment score = 0.000000  
GGATCAGGAAACGGCGAA

>Bacillus\_Fam\_1913\_18\_1 Nr. of seq. 1 Alignment length(with gaps) = 18  
Alignment score = 0.000000  
CGTTTCGCACCGTTTCGCGT

>Bacillus\_Fam\_1914\_18\_1 Nr. of seq. 1 Alignment length(with gaps) = 18  
Alignment score = 0.000000  
TCATCTCCTCCTGTTCCG

>Bacillus\_Fam\_1915\_18\_1 Nr. of seq. 1 Alignment length(with gaps) = 18  
Alignment score = 0.000000  
ATCACTGACACCATTGAT

>Bacillus\_Fam\_1916\_18\_1 Nr. of seq. 1 Alignment length(with gaps) = 18  
Alignment score = 0.000000  
TGCCTTGACCGCTGCCAT

>Bacillus\_Fam\_1917\_18\_1 Nr. of seq. 1 Alignment length(with gaps) = 18  
Alignment score = 0.000000  
GTTGTTCTCAGTTTTTGC

>Bacillus\_Fam\_1918\_18\_1 Nr. of seq. 1 Alignment length(with gaps) = 18  
Alignment score = 0.000000  
GCTGCATTTGCGGTGTCG

>Bacillus\_Fam\_1919\_18\_1 Nr. of seq. 1 Alignment length(with gaps) = 18  
Alignment score = 0.000000  
TCTTCCATGTTTGTATCA

>Bacillus\_Fam\_1920\_18\_1 Nr. of seq. 1 Alignment length(with gaps) = 18  
Alignment score = 0.000000  
GTCCATGGGGCTGGGGCC

>Bacillus\_Fam\_1921\_18\_1 Nr. of seq. 1 Alignment length(with gaps) = 18  
Alignment score = 0.000000  
CCTTGCAATCATCGGCTGG

>Bacillus\_Fam\_1922\_18\_1 Nr. of seq. 1 Alignment length(with gaps) = 18  
Alignment score = 0.000000  
CAGCTCCAGCAGCTTGAA

>Bacillus\_Fam\_1923\_18\_1 Nr. of seq. 1 Alignment length(with gaps) = 18  
Alignment score = 0.000000  
GAGAAAAGCAAGGAGCAC

>Bacillus\_Fam\_1924\_18\_1 Nr. of seq. 1 Alignment length(with gaps) = 18  
Alignment score = 0.000000  
CCTGGTTGCGNGCAAAG

>Bacillus\_Fam\_1925\_17\_1 Nr. of seq. 1 Alignment length(with gaps) = 17  
Alignment score = 0.000000  
ATGATGCAAAAAAGACG

>Bacillus\_Fam\_1926\_15\_1 Nr. of seq. 1 Alignment length(with gaps) = 15  
Alignment score = 0.000000  
GTAACAATGAACCAA

>Bacillus\_Fam\_1927\_15\_1 Nr. of seq. 1 Alignment length(with gaps) = 15  
Alignment score = 0.000000  
GCAGCAGTTCNCGGC

>Bacillus\_Fam\_1928\_15\_1 Nr. of seq. 1 Alignment length(with gaps) = 15  
Alignment score = 0.000000  
GGATCTTCTTTNACC

>Bacillus\_Fam\_1929\_15\_1 Nr. of seq. 1 Alignment length(with gaps) = 15  
Alignment score = 0.000000  
AATAATGGCAACGGC

>Bacillus\_Fam\_1930\_15\_1 Nr. of seq. 1 Alignment length(with gaps) = 15  
Alignment score = 0.000000  
TATTCGCTCCAGTGC

>Bacillus\_Fam\_1931\_15\_1 Nr. of seq. 1 Alignment length(with gaps) = 15  
Alignment score = 0.000000  
ATCACGAATTCTATA

>Bacillus\_Fam\_1932\_15\_1 Nr. of seq. 1 Alignment length(with gaps) = 15  
Alignment score = 0.000000  
ATTTCTCCGCTTGGC

>Bacillus\_Fam\_1933\_15\_1 Nr. of seq. 1 Alignment length(with gaps) = 15  
Alignment score = 0.000000  
ATTGTAAAAATAAAT

>Bacillus\_Fam\_1934\_15\_1 Nr. of seq. 1 Alignment length(with gaps) = 15  
Alignment score = 0.000000  
TTCAAGTTCAAGCAA

>Bacillus\_Fam\_1935\_15\_1 Nr. of seq. 1 Alignment length(with gaps) = 15  
Alignment score = 0.000000  
AGATTGAGTAAACAG

>Bacillus\_Fam\_1936\_15\_1 Nr. of seq. 1 Alignment length(with gaps) = 15  
Alignment score = 0.000000  
GCTGGTGCCTTCGCT

>Bacillus\_Fam\_1937\_15\_1 Nr. of seq. 1 Alignment length(with gaps) = 15  
Alignment score = 0.000000  
TTAATTGGTGCTNCT

>Bacillus\_Fam\_1938\_15\_1 Nr. of seq. 1 Alignment length(with gaps) = 15  
Alignment score = 0.000000  
TGAACTTCTTATTTC

>Bacillus\_Fam\_1939\_15\_1 Nr. of seq. 1 Alignment length(with gaps) = 15  
Alignment score = 0.000000  
TTCATCGGTTGCTGG

>Bacillus\_Fam\_1940\_15\_1 Nr. of seq. 1 Alignment length(with gaps) = 15  
Alignment score = 0.000000  
ATGCATGAGAACACC

>Bacillus\_Fam\_1941\_15\_1 Nr. of seq. 1 Alignment length(with gaps) = 15  
Alignment score = 0.000000  
AGACGTTCTAGTAGA

>Bacillus\_Fam\_1942\_15\_1 Nr. of seq. 1 Alignment length(with gaps) = 15  
Alignment score = 0.000000  
TCTCCGTGCTCATGG

>Bacillus\_Fam\_1943\_15\_1 Nr. of seq. 1 Alignment length(with gaps) = 15  
Alignment score = 0.000000  
GAAGTGTTCCGTCTC

>Bacillus\_Fam\_1944\_15\_1 Nr. of seq. 1 Alignment length(with gaps) = 15  
Alignment score = 0.000000  
CAACCGATCCAGGAC

>Bacillus\_Fam\_1945\_15\_1 Nr. of seq. 1 Alignment length(with gaps) = 15  
Alignment score = 0.000000  
AATCCTGGACCTCCA

>Bacillus\_Fam\_1946\_15\_1 Nr. of seq. 1 Alignment length(with gaps) = 15  
Alignment score = 0.000000  
CCGGGGAAACCGCCA

>Bacillus\_Fam\_1947\_15\_1 Nr. of seq. 1 Alignment length(with gaps) = 15  
Alignment score = 0.000000  
CACTGATGATCCGGG

>Bacillus\_Fam\_1948\_15\_1 Nr. of seq. 1 Alignment length(with gaps) = 15  
Alignment score = 0.000000  
TGCATCATTTGGTGAT

>Bacillus\_Fam\_1949\_14\_1 Nr. of seq. 1 Alignment length(with gaps) = 14  
Alignment score = 0.000000  
ATTTTGTAGTCGTG

>Bacillus\_Fam\_1950\_13\_1 Nr. of seq. 1 Alignment length(with gaps) = 13  
Alignment score = 0.000000  
TACTAGGAGACAG

>Bacillus\_Fam\_1951\_13\_1 Nr. of seq. 1 Alignment length(with gaps) = 13  
Alignment score = 0.000000  
AGTGTTTCAGGATA

>Bacillus\_Fam\_1952\_12\_1 Nr. of seq. 1 Alignment length(with gaps) = 12  
Alignment score = 0.000000  
CGTGATGGTAAT

>Bacillus\_Fam\_1953\_12\_1 Nr. of seq. 1 Alignment length(with gaps) = 12  
Alignment score = 0.000000  
CGTTCAAGCCGT

>Bacillus\_Fam\_1954\_12\_1 Nr. of seq. 1 Alignment length(with gaps) = 12  
Alignment score = 0.000000  
CAAATATGATGC

>Bacillus\_Fam\_1955\_12\_1 Nr. of seq. 1 Alignment length(with gaps) = 12  
Alignment score = 0.000000  
CGTTGTATTATT

>Bacillus\_Fam\_1956\_12\_1 Nr. of seq. 1 Alignment length(with gaps) = 12  
Alignment score = 0.000000  
ATGCAAACTCTA

>Bacillus\_Fam\_1957\_12\_1 Nr. of seq. 1 Alignment length(with gaps) = 12  
Alignment score = 0.000000  
CTTTTTTACAAC

>Bacillus\_Fam\_1958\_12\_1 Nr. of seq. 1 Alignment length(with gaps) = 12  
Alignment score = 0.000000  
ACGACATGGACA

>Bacillus\_Fam\_1959\_12\_1 Nr. of seq. 1 Alignment length(with gaps) = 12  
Alignment score = 0.000000  
TGGTTCCATTGC

>Bacillus\_Fam\_1960\_12\_1 Nr. of seq. 1 Alignment length(with gaps) = 12  
Alignment score = 0.000000  
TCTTTGATTCCT

>Bacillus\_Fam\_1961\_12\_1 Nr. of seq. 1 Alignment length(with gaps) = 12  
Alignment score = 0.000000  
ATTGGTGCCTTT

>Bacillus\_Fam\_1962\_12\_1 Nr. of seq. 1 Alignment length(with gaps) = 12  
Alignment score = 0.000000  
GGGCGTTCTTCG

>Bacillus\_Fam\_1963\_11\_1 Nr. of seq. 1 Alignment length(with gaps) = 11  
Alignment score = 0.000000  
GCACTATTTTC

>Bacillus\_Fam\_1964\_11\_1 Nr. of seq. 1 Alignment length(with gaps) = 11  
Alignment score = 0.000000  
AGGGGCTTAGA

>Bacillus\_Fam\_1965\_11\_1 Nr. of seq. 1 Alignment length(with gaps) = 11  
Alignment score = 0.000000  
CCAAAAACCGC

>Bacillus\_Fam\_1966\_10\_1 Nr. of seq. 1 Alignment length(with gaps) = 10  
Alignment score = 0.000000  
TTGTCGCGGA
